# Supplementary material
Source: PubMed Central journal article supplement (PMC5642708)
Supplement: pnas.1708023114.sapp.pdf [file pnas.1708023114.sapp.pdf]

**Classification: Biological Science**

**Heterochronic Truncation of Odontogenesis in Theropod Dinosaurs Provides Insight into the Macroevolution of Avian Beaks**

Shuo Wang<sup>a,b</sup> Josef Stiegler<sup>c</sup> Ping Wu<sup>d</sup> Cheng-Ming Chuong<sup>d</sup> Dongyu Hu<sup>e</sup>  
Amy Balanoff<sup>f</sup> Yachun Zhou<sup>g,h</sup> Xing Xu<sup>g</sup>

<sup>a</sup> Laboratory of Vertebrate Evolution, College of Life Science, Capital Normal University, Beijing 100048, China.

<sup>b</sup> State Key Laboratory of Palaeobiology and Stratigraphy, Nanjing Institute of Geology and Palaeontology, Chinese Academy of Sciences, Nanjing, 210008, China.

<sup>c</sup> Department of Biological Sciences, The George Washington University, Washington DC 20052, USA.

<sup>d</sup> Department of Pathology, Keck School of Medicine, University of Southern California, Los Angeles, CA 90033, USA.

<sup>e</sup> Paleontological Institute of Shenyang Normal University, Paleontological Museum of Liaoning, Key Laboratory for Evolution of Past Life in Northeast Asia, Ministry of Land and Resources, Shenyang 110034, China.

<sup>f</sup> Center for Functional Anatomy and Evolution, Johns Hopkins University, Baltimore, MD 21205, USA.

<sup>g</sup> Key Laboratory of Vertebrate Evolution and Human Origin of Chinese Academy of Sciences, Institute of Vertebrate Paleontology & Paleoanthropology, Chinese Academy of Sciences, Beijing 100044, China.

<sup>h</sup> University of Chinese Academy of Sciences, Beijing 100049, China.

## **SI Appendix**

- 1. Abbreviations.**
- 2. Identification of caenagnathid and *Saperonis* specimens.**
- 3. Experimental Procedures for Mi-CT scan.**
- 4. Methods for evolutionary development experiments.**
- 5. Additional discussion of the homologous of the alveolar canal.**
- 6. Additional discussion of the macro-evolutionary model for vertebrate tooth loss.**
- 7. Character Correlation Analysis.**
- 8. Image Attributions.**

## **References**

## **1. Abbreviations.**

**BMNH**, Beijing Museum of Natural History, Beijing, China; **CAGS**, Chinese Academy of Geological Sciences, Beijing, China; **CCMGE**, Chernyshev's Central Museum of Geological Exploration, Saint Petersburg, Russia; **CDPC**, Changzhou Dinosaur Park of China, Changzhou, China; **CM**, Carnegie Museum of Natural History, Pittsburgh, Pennsylvania, USA; **CMN**, Canadian Museum of Nature, Ottawa, Canada; **DNHM**, Dalian Natural History Museum, Dalian, China; **HGM**, Henan Geological Museum, Zhengzhou, China; **LPM**, Liaoning Paleontological Museum, Shenyang, China; **IVPP**, Institute of Vertebrate Paleontology and Paleoanthropology, Beijing, China; **RTMP**, Royal Tyrell Museum of Paleontology, Drumheller, Alberta, Canada; **STM**, Shandong Tianyu Museum of Natural History, Linyi, China; **USNM**, National Museum of Natural History, Smithsonian Institution, Washington D.C., USA.

## **2. Identification of *Confuciusornis* sp. and *Sapeornis* sp. specimens.**

IVPP V23275 is an incomplete skeleton consists of nearly complete mandibles, possible left premaxilla, incomplete right quadrate, incomplete left palatine, nearly complete articulated cervical vertebrae and at least three anterior dorsal vertebrae (Fig. S1). It was identified as *Confuciusornis* sp. based on the presence of edentulous beak and relative large mandibular fenestra (1).

LPM B00015 is a nearly complete skeleton consists of most cranial elements (Table S1), both forelimbs and hindlimbs, pectoral girdle and some dorsal vertebrae. It was referable to *Sapeornis* sp. based on the presence of four premaxillary and three maxillary teeth, humeral deltopectoral crest penetrated by a large oval foramen and stout boomerang-shaped furcula with short hypocleidium (2). This specimen will be described in detailed in a separated paper.

### **3. Experimental Procedures for Mi-CT scan.**

IGM 100/973 was scanned using the High-Resolution X-ray Computed Tomography Facility at the University of Texas (3), IVPP V15923 was scanned using SR- $\mu$ CT (Shanghai Synchrotron Radiation Facility, SSRF) (4), whereas the rest of specimens were scanned using the Mi-CT 225kV micro-computerized tomography (developed by the Institute of High Energy Physics, Chinese Academy of Sciences) CT at the Key Laboratory of Vertebrate Evolution and Human Origins, Institute of Vertebrate Paleontology and Paleoanthropology, Chinese Academy of Sciences.

All of the specimens were scanned along the sagittal axis except IGM 100/973 (3), which was scanned along the coronal axis. The resolutions of the Mi-CT images are 127 $\mu$ m, 34 $\mu$ m, 42 $\mu$ m, 98 $\mu$ m, 163 $\mu$ m and 4.7 $\mu$ m for IVPP 1361, IVPP V20377, LPM B00015, IVPP 1032, IGM 100/973 (3) and IVPP V23275, respectively. A total of 913 slices were acquired for IGM 100/973 and was reconstructed in a 1024\*1024 matrix using VGStudio Max 2.0.1 (3), whereas the images for the rest specimens were reconstructed in a 2048\*2048 matrix of 1563 slices using two-dimensional reconstruction software developed by the Institute of High Energy Physics, Chinese Academy of Sciences. The 3D reconstruction was performed using Mimics (Version 16.0).

The transverse section of IVPP 1361, IVPP V20377, LPM B00015, IVPP 1032, IGM 100/973 and IVPP V23275 is 30mm, 8mm, 17mm, 18mm, 24mm and 11mm from the anterior end of the dentary, respectively.

#### **4. Methods for evolutionary development experiments**

##### **Chicken eggs and beak tissue processing**

Pathogen-free fertilized chick eggs (White Leghorn) were purchased from SPAFAS (Preston, CT). Chicken embryonic stages are according to Hamburger and Hamilton (5). We collected E7 (stage 31), E11 (stage 37), E12 (stage 38) and E20 (stage 45) at normal and experimental conditions. Paraffin sections were prepared. Section and whole mount in situ hybridizations are performed as described in (6).

##### **Virus Infection**

RCAS retrovirus preparation was performed using protocols as described in (7). Virus (2  $\mu$ l) was microinjected at E3.5-E4 (stage 22-23) into multiple beak prominences according the method of (8).

##### **Cloning of beak keratin**

Using a chick E11 beak cDNA library as a template, degenerate chicken  $\beta$ -keratin primers were used for PCR reactions. This pair of degenerative primers covers a region of beta-keratin homology (9). The forward primer is 5'-ATGCCTGCTHYRRYCTGTG-3' and the backward primer is 5'-TTAGCAGGGCMSRCASCTSC-3'. The Genbank accession number is AY239222.

## 5. Additional discussion of the homologies of the alveolar canal

The mandibular canal of vertebrates carries the mandibular nerve ( $V_3$ ), inferior alveolar artery, and inferior alveolar vein anteriorly through the mandibular foramen on the medial aspect of the dentary. In edentulous vertebrates, the mandibular canal is nearly always the largest foramen inside the dentary, and it supplies capillaries and nerves that nourish the keratinized rhamphotheca. In toothed vertebrates, the mandibular canal is situated beneath or adjacent to the alveoli and supplies nourishment and sensation to the teeth and integument.

The dorsally enclosed alveolar canals described in *Limusaurus*, Caenagnathidae, and *Sapeornis* are independent from the mandibular canal. The alveolar canal is situated dorsal to the mandibular canal, and extends sub-parallel to the latter structure in the taxa described in the main text. The alveolar canal is present in taxa with vestiges of alveoli on the occlusal surface of the dentary and lingual ridges on the dorsomedial aspect of the dentary; (III) in taxa with ontogenetic tooth reduction, the alveolar canal is always present in the toothless region, leaving the mandibular canal is the only canal beneath the teeth; (IV) when the vestigial alveoli still remain, the alveolar canal always communicates with the alveoli via tiny tubes or foramina; (V) the internal surface of the alveolar canal is usually not as smooth as the wall of the mandibular canal, suggesting that it has been remodeled; (VI) unlike the mandibular canal, the alveolar canal does not open on the medial aspect of the dentary; (VII) in some cases, tiny branches communicate with the alveolar canal extend onto the lateral surface of the dentary as well as the medial face of the dentary's buccal edge as anastomosing vascular grooves, an osteological correlate of branches of capillary and nerves that nourish the keratinized rhamphotheca.

This morphological evidence suggests the alveolar canal is independent from the mandibular canal and has been modified from the space that once accommodated dental tissue, thus it is homologous to the alveoli in other toothed archosaurians.

## **6. Additional discussion of the macro-evolutionary model for vertebrate tooth loss (Figs. 3, S3)**

The following is a brief discussion of each taxon illustrated in Figs. 3, S3

### **Acipenseridae**

All extant sturgeons exhibit postnatal ontogenetic edentulism. They have marginal teeth as larvae, and are edentulous post-larvally (10).

### **Polyodontidae**

All extant paddlefish exhibit postnatal ontogenetic edentulism. They have marginal teeth as larvae, and are edentulous post-larvally (11).

### **Clupeidae**

The Japanese sardine *Sardinops melanostictus* bears small teeth on the anterior portion of the dentary as larvae and undergoes complete postnatal ontogenetic edentulism (12). The gizzard shad *Dorosoma* has small teeth on its upper jaw as fry and also undergoes complete postnatal ontogenetic edentulism (13). Early in the postnatal ontogeny of *Dorosoma*, a portion of the gut thickens to form a gizzard (14).

### **Chanidae**

The milkfish *Chanos chanos* is apparently edentulous throughout ontogeny and teeth have not been identified in fossil representatives. *Chanos* possesses a muscular gizzard, numerous pyloric ceca, and an extremely convoluted intestine (15).

### **Callichthyidae**

The genera *Corydoras* and *Hoplosternum* exhibit complete postnatal ontogenetic edentulism larvae and juveniles forage pelagically for brine shrimp, whereas adults forage benthically using barbels and suction feeding (16).

### **Schilbeidae**

The schilbeid catfish *Siluranodon* bears teeth on the upper and lower jaws in juveniles, but individuals become edentulous as they age and generally complete their postnatal ontogenetic edentulism at large body sizes (17)

### **Doradidae**

Several species of the genus *Leptodoras* bear small teeth at the anterior extent of the dentaries and juveniles, but become completely edentulous by adulthood (18).



### **Pangasiidae**

The genus *Pangasianodon* exhibits complete postnatal ontogenetic edentulism (19).

### **Ammodytidae**

Larvae of *Gymnamodytes semisquamatus* bear vomerine teeth as well as sharp tooth-like protrusions on the premaxillae as young juveniles. Both the true vomerine teeth and the premaxillary structures are lost by adulthood (20).

### **Xiphiidae**

The rostra of most adult billfishes are covered with small villiform teeth, an apomorphic reduction from the plesiomorphic condition. Some fossil Xiphiidae retain villiform teeth on the rostrum as adults, but *Xiphias gladius* undergoes complete postnatal ontogenetic edentulism (21, 22).

### **Mullidae**

Teeth are present in the premaxillae of juvenile *Mullus barbatus* and *M. surmuletus*, but are lost by adulthood in both species (23).

### **Syngnathidae**

Teeth are absent throughout ontogeny in Hippocampinae as the mouthparts have been integrated into a tubed rostrum prior to hatching (24).

### **Sirenidae**

Fossil Sirenidae are fully toothed (25), but extant Sirenidae retain palatal dentition and lack marginal dentition in adulthood (26). Some accounts state that sirens lack all marginal dentition, however Rose (26) describes the appearance of dentary teeth at 21.5 mm, and the loss of those teeth between 24.5 mm and 32.5 mm when the keratinous beak appears on the dentary. In addition to possessing a rhamphotheca, gut fermentation has been described in *Siren lacertian* (27), so given that adults retain palatal dentition, both mechanical and digestive tools have been acquired prior to complete edentulism.

### **Rhinophrynidae**

The genus *Rhinophrynus* is completely edentulous throughout its ontogeny (28, 29). Its tadpoles lack the keratodonts and jaw sheaths present in other taxa, but unlike other frogs, its rostrum is heavily keratinized in adulthood. Epidermal cells on the upper and lower jaws contain keratinous spicules that protrude from the skin, but these spicules do not form a coherent structure as in the

beaks of birds or turtles. The only known fossil rhinophrynid with teeth preserves a toothed maxilla but no definitive premaxilla or dentary (30), therefore information on the pattern leading to edentulism is unknown for Rhinophrynidae.

### **Bufonidae**

All known species of Bufonidae lack teeth throughout ontogeny, and the transition to edentulism has not been documented in the fossil record (31, 32).

### **Telmatobiidae**

Most species of *Telmatobius* have fang-like teeth on the premaxillae and dentaries. *Telmatobius halli* and *T. degener* have edentulous premaxillae throughout ontogeny, but their maxillary teeth are rudimentary and fail to erupt through the labial mucosa in *T. halli* (33, 34). This represents a postnatal truncation of normal odontogenesis similar to that found in the non-functional teeth of monodontid and ziphiid odontocete whales. Other species of *Telmatobius* lack premaxillary teeth polymorphically. *T. vilamensis* and *T. intermedius* are completely edentulous, but some individuals are reported to bear teeth (34).

### **Monotremata**

The oldest recognized fossil monotremes and other probable Australosphenida from the Early Cretaceous of Australia show evidence of an initial phylogenetic reduction in the dentition, and absence of evidence for a secondary tool. A dentary referred to *Teinolophos trusleri* shows large diastemata between the premolars and more anterior teeth, though it retains incisors at the rostral tip of the dentary and has been interpreted as lacking a rhamphotheca (35).

Extant monotremes include only three genera, *Ornithorhynchus* (platypus in the family Ornithorhynchidae) and two genera in the Tachyglossidae (echidnas), *Tachyglossus* and *Zaglossus*. All three genera bear a true premaxillary egg tooth that is lost within days of hatching, and the adults of each genus are completely edentulous (36-38). Recognized fossil tachyglossids lack teeth, but the fossil ornithorhynchid *Obdurodon* retains molars in the maxillae and dentaries, and likely possessed a rhamphotheca anteriorly(39). Juvenile *Ornithorhynchus* retain a deciduous dentition similar in topology to adult *Obdurodon*, and the dentition is replaced by keratinous pads during postnatal ontogeny (32, 36).

### **Vermilingua**

The transition to complete postnatal edentulism has not been documented in anteaters as the

fossil record is relatively poor. Anteaters possess tooth rudiments embryonically, which are resorbed prior to birth (32).

### **Pholidota**

The non-pholidotan Pholidotomorpha *Palaeanodon* and *Metacheiromys* lack incisors and have small postcanine teeth, whereas all known Pholidota are completely edentulous (40). Though protrusible tongues have been inferred for Palaeanodontidae (41) there is no direct evidence other than absence of incisors, therefore it is likely but not certain that secondary tools were attained prior to complete tooth loss in Pholidota. Extant pangolins lack teeth postnatally and possess a sticky tongue. At least some species have a gizzard-like stomach and ingest small stones to form a gastric mill (42). Embryonic tooth vestiges are present in at least some species of extant pangolins (43).

### **Mysticeti**

All extant mysticete whales are completely edentulous during postnatal ontogeny, however the fetuses of at least some species possess teeth that are transiently present in utero (44, 45).

Rather than a distinct anterior or posterior initial reduction pattern for tooth loss, it appears as though diastemata between teeth increased in size such that tooth positions were still present in anterior and posterior positions within the jaws and evenly spaced in between, a pattern present in *Llanocetus*. At least some eomysticetid whales retained potentially vestigial alveoli in the anterior portions of the premaxillae and dentaries (46), and one specimen preserves a single apparently non-functional tooth (47). Species level ontogenetic series are lacking, and juvenile specimens are necessary to confirm the presence of postnatal ontogenetic edentulism in stem mysticetes.

### **Odontoceti**

Ziphiid and monodontid odontocetes exhibit nearly complete reduction of the postnatal dentition, and both lineages have sexually dimorphic reduction patterns. Most species of ziphiid whales have only one or two erupted teeth anteriorly in males, while females lack erupted teeth. Ziphiidae retain vestigial upper and lower dentitions postnatally that are variable in number and degree of eruption, often lacking any even partially erupted teeth beyond the anterior tusk in males such that there is a postnatal truncation of the odontogenetic program (48).

The narwhal *Monodon* exhibits a sexually dimorphic and bilateral reduction pattern. Adult males typically retain one erupted tooth, whereas teeth are present but unerupted in juveniles and females (49).

### **Hupehsuchia and Nasorostra**

All known Hupehsuchia and Nasorostra are completely edentulous. Disagreement regarding the phylogenetic placement of Ichthyosauriformes makes questions regarding transitions to edentulism difficult, especially given the presence of teeth in early Ichthyopterygia.

### **Shastasauridae**

A purported example of postnatal ontogenetic edentulism is present in the genus *Shonisaurus* (50). However, while some adult specimens have teeth, the apparently edentulous adult specimen has a badly damaged rostrum. Both adult and juvenile specimens of *Shastasaurus liangae* are edentulous (51). Further study and new specimens are needed to determine whether ontogenetic reduction of the dentition occurred in Shastasauridae.

### **Leptonectidae**

*Temnodontosaurus azerguensis* has a long and narrow, apparently edentulous rostrum with shallow alveolar grooves and rudimentary interdental septa, while the much smaller *T. nuertingensis* has teeth. Martin et al. (52) briefly addressed the possibility that these taxa are conspecific, but rejected that hypothesis. Given the sometimes extreme transformations known in taxa with postnatal ontogenetic edentulism, the possibility that these taxa are conspecific cannot be rejected without additional specimens from different ontogenetic stages.

### **Thunnosauria**

Ontogenetic reduction of the dentition was recently identified in *Stenopterygius* (53). Juveniles possess relatively large teeth, whereas adults possess relatively small teeth which were presumed non-functional by the authors. The ontogenetic reduction was interpreted to result from a combination of negative growth allometry, ontogenetic changes in growth rate, and early senescence of the dental lamina.

### **Askeptosauroidea**

The askeptosauroid thallosaur *Miodontosaurus* lacks maxillary teeth, but has premaxillary and dentary teeth at the anterior ends of the rostra (54). Another askeptosauroid thallosaur, *Endennasaurus* is completely edentulous and possesses anteriorly pointed premaxillae and dentaries, but lacks other osteological correlates of rhamphothecae (55).

### ***Xinpusaurus***

The thallosaur *Xinpusaurus* has pointed anteriorly edentulous premaxillae and dentaries

(56), but no other osteological correlates of rhamphothecae have been described.

### ***Henodus***

*Henodus* retains only posteriorly positioned palatine and dentary tooth plates. It has a row of small tooth like structures on the premaxillae but these are presumed to be pseudoteeth and are termed denticles (57). Baleen like structures preserved on some specimens suggest a filter feeding function, and a secondary tool that was present prior to complete edentulism.

### **Placochelyidae**

Placochelyid placodonts have teeth posteriorly, but anteriorly bear elongate rostra that are edentulous (58). These rostra are devoid of osteological correlates of rhamphothecae.

### **Typhlopidae**

Teeth occur only in the maxillae of typhlopids snakes (59).

### **Leptotyphlopidae**

Teeth occur only on the anterior portion of the dentaries in leptotyphlopids snakes (59).

### **Anomalepididae**

Anomalepidid snakes lack premaxillary teeth and the maxillary teeth are posteriorly oriented as in Typhlopidae. Dentary teeth are limited to the anterior portion of the element (60).

### ***Emydocephalus***

*Emydocephalus* is oophagous, feeding almost exclusively on fish eggs. It retains fangs and pterygoid teeth, whereas teeth are absent in the remainder of the maxillae, the premaxillae, palatines, and dentaries. *Emydocephalus* has partial embryonic (and possibly postnatal) ontogenetic edentulism, as late term fetuses retain numerous superficially positioned first generation teeth within the oral mucosa (61).

### **Atractaspidae**

*Atractaspis* (the mole viper) has only fangs, but relies on these remaining teeth to perform critical functions (62) and is therefore unlikely to lose its remaining dentition without a secondary tool for food acquisition.

### ***Dasypeltis***

Though the above non-scolecophidian snakes exhibit marked tooth reduction, teeth still play a critical role in food acquisition and are unlikely to be lost without the acquisition of a non-dental secondary tool. *Dasypeltis* seems the most likely extant squamate lineage to approach or reach

complete edentulism. *Dasypeltis* has elaborated its vertebral hypapophyses to an extreme degree, such that they enter the esophagus and serve to rupture eggs as they are swallowed (63, 64). This snake exhibits anterior reduction of the dentition, with only small teeth at the posterior ends of the maxillae and dentaries (65, 66).

### ***Aprasia***

Pygopodid geckos of the genus *Aprasia* show dimorphic regional edentulism. Males have toothed premaxillae while females and juveniles do not (67).

### ***Lygosoma miopus***

*L. miopus* is unique among skinks in lacking premaxillary teeth (68). The dentaries bear teeth, but it is unclear from published descriptions whether they are regionally edentulous.

### ***Pachygenys***

*Pachygenys* is an enigmatic squamate known from only several small dentaries and thought to be allied with skinks (68, 69). In both *Pachygenys* dentaries and the potentially closely related squamate *Hakuseps* (70), dentary teeth are confined to the rostral portion of the element.

### **Testudinata**

The phylogenetic relationships of turtles have recently been elucidated by a series of molecular and paleontological studies. Turtles have been recognized as basal archosauromorph diapsids, and several Permian and Triassic taxa illustrate the transition from turtles with complete marginal and palatal dentitions to completely edentulous beaked forms (71-74), however transitional morphologies relevant to the marginal dentition remain unknown.

### **Drepanosauridae**

The drepanosaurid *Megalancosaurus* has anteriorly edentulous premaxillae, and both the premaxillae and dentaries have pointed rostral ends.

Only anteriorly acuminate and edentulous dentaries have been described from the skull of the drepanosaurid *Hypuronector* (75). Poor preservation of the material precludes identification of other osteological correlates supporting the presence of a rhamphotheca.

### **Aetosauria (76)**

Nearly all Aetosauria have either anteriorly edentulous or completely edentulous premaxillae, and anteriorly edentulous dentaries. Most authors presume that a keratinous beak was present, though some doubt has been cast on the presence of a rhamphotheca in Aetosauria. *Longosuchus*

*meadi*, *Stagonolepis olenkae*, and *Desmotosuchus haplocerus* each possess osteological correlates of rhamphothecae including edentulous acuminate margins of the dentaries and/or premaxillae with mildly expressed tangential rugosities, making the presence of a beak likely in at least some taxa.

#### ***Lotosaurus* + Shuvosauridae**

The poposauroid pseudosuchians *Lotosaurus*, *Shuvosaurus*, and *Effigia* are completely edentulous and bear osteological correlates of rhamphothecae including acuminate edges of premaxillae, maxillae, and dentaries (76, 77). Early-diverging poposauroids lack edentulous regions of the jaws (78) and cranial remains of *Poposaurus gracilis* are incompletely known but bear teeth (79). The transition to edentulism has not been documented within Poposauroidea as of yet.

#### ***Macelognathus***

*Macelognathus* dentaries bear teeth posteriorly but are edentulous rostrally, though the occlusal margins are poorly preserved in each specime (80).

#### **Shartegosuchidae**

The rostral tips of the dentaries are edentulous in several Shartegosuchidae (81-83).

#### ***Sphagesaurus***

The premaxillae of *Sphagesaurus* are rostrally edentulous (84).

#### ***Anatosuchus***

The rostral tip of the dentaries bear an edentulous flange in *Anatosuchus* that is visible in CT reconstructions, but has not been illustrated (85).

#### **Eopterosauria**

*Raeticodactylus* has an edentulous, acuminate rostral margin of the dentary. This area was described as possessing “ridges” and likely was adorned with a rhamphotheca (86). This represents an initial phylogenetic reduction from the plesiomorphic state (87).

#### ***Campylognathoides***

*Campylognathoides* has a short edentulous portion of the rostral-most dentary. This represents an initial phylogenetic reduction from the plesiomorphic state (87).

#### **Rhamphorhynchinae**

*Rhamphorhynchus* has anteriorly edentulous premaxillae and dentaries that taper to points, and some specimens preserve soft tissue structures consistent with keratinous rhamphothecae on both sets of elements (88). *Dorygnathus* has anteriorly edentulous dentaries. This represents an initial

phylogenetic reduction from the plesiomorphic state (87).

### ***Germanodactylus***

*Germanodactylus cristatus* has anteriorly edentulous premaxillae and dentaries. A specimen of the closely related taxon *Pterodactylus* preserves soft tissue evidence of tiny keratinous rhamphothecae between the anteriormost teeth in both the upper and lower jaws (89). This represents an initial phylogenetic reduction from the plesiomorphic state (87).

### ***Huanhepterus***

Teeth are limited to the anterior part of the rostrum in *Huanhepterus*. They are present in the premaxillae and the anterior portions of the maxillae and dentaries (90). This represents an initial phylogenetic reduction from the plesiomorphic state (87).

### **Gallodactylidae**

In specimens of Gallodactylidae where teeth are known and the rostrum is relatively well preserved, the alveoli are not visible and the teeth have become disarticulated. However, the teeth are heavily concentrated near the rostral tip of the upper and lower jaws, and presumably reflect the topology of the dentition in this taxon (91).

### **Nyctosauridae**

The genera *Nyctosaurus* and *Muzquizopteryx* are edentulous, but their ontogenies are poorly known and the transition to edentulism has not been documented.

### **Pteranodontidae**

All known pteranodontid pterosaurs are completely edentulous, though the transition to edentulism in this lineage has not been documented. Other than edentulism and acuminate anterior portions of the premaxillae and dentaries, osteological correlates of rhamphothecae are apparently lacking in Pteranodontidae (92).

### **Istiodactylidae**

Teeth are limited to the anterior portion of the rostrum in istiodactylid pterosaurs. An acuminate protuberance has been reported at the anterior extent of the mandible in *Istiodactylus*, suggesting the possible presence of a keratinous sheath in this location (93).

### **Dsungaripteridae**

Dsungaripterid pterosaurs have edentulous premaxillae and possess teeth only posteriorly on the dentaries. The toothless anterior ends of the rostrum are pointed on both upper and lower jaws,



suggesting the possible presence of rhamphothecae (94, 95). In some phylogenetic hypotheses Dsungaripteridae is the sister taxon to Adzhardchoidea (96, 97), and in this case Dsungaripteridae may provide evidence for an initial phylogenetic reduction in the dentition prior to complete edentulism in Adzhardchoidea. In other phylogenetic hypotheses, the toothed dsungaripterids are nested within the otherwise edentulous Adzhardchoidea (87).

### **Adzhardchoidea**

All Adzhardchoidea (excluding Dsungaripteridae when included) are completely edentulous in known ontogenetic stages (87).

### **Silesauridae**

Silesauridae lack teeth at the acuminate rostral tip of the dentary, and the surface texture in this location is suggestive of a rhamphotheca or horn with a keratinous sheath (76, 98). It is unclear whether the anteriorly reduced dentary dentition is apomorphic within Silesauridae, or whether the reduced condition represents a synapomorphy or symplesiomorphy of Dinosauromorpha or one of its subclades including Dinosauria and Silesauridae (76). If the dentary preserved in the same concretion as *Lewisuchus* belongs to that taxon (99), then the anterior dentary teeth were reduced independently in Silesauridae and Ornithischia, given the early diverging position of *Lewisuchus* (100).

### **Ornithischia**

Ornithischian dinosaurs possess a neomorphic edentulous prementary element which was recently the subject of an extensive review (101). All ornithischian premaxillae are at least edentulous at their rostral tips if not fully edentulous, and ceratopsians also possess a neomorphic edentulous rostral bone anterior to the premaxillae (76, 102). No ornithischians are completely edentulous, and the rhamphothecae were presumably homologous to only the premaxillary and mandibular nails. The edentulous jaw elements always possess at least some osteological correlates of rhamphothecae including acuminate, and/or crenulate occlusal edges, obliquely exiting neurovascular foraminae, neurovascular impressions, and tangential rugosity. The independence of the reduction in dentition present in Ornithischia is dependent on the condition plesiomorphic condition for Silesauridae and Lagerpetidae and other non-dinosaurian Dinosauromorpha such as *Marasuchus* but dentaries have not been described for *Lewisuchus*, *Marasuchus*, or Lagerpetidae (see Silesauridae above).

### ***Bonitasaura***

The nemegtosaurid sauropod *Bonitasaura* has dentary teeth anteriorly, but possesses several osteological correlates of rhamphothecae on its posterior dentary: an acuminate edentulous margin, impressed neurovascular grooves, and obliquely exiting foramina (103, 104).

### **Diplodocoidea**

Sereno et al. (105) suggested that *Nigersaurus* may have a keratinous sheath covering the anterior rostrum based on the presence of dense impressed neurovascular grooves on the anterior surfaces of the premaxillae, maxillae and dentaries. *Nigersaurus* also has an acuminate margin on the posterior edentulous portion of its maxillae and dentaries, and a lip ventral to the acuminate portion on the dentaries. The surface texture of *Nigersaurus* dentigerous elements appears closer to hummocky rugosity than impressed neurovascular grooves as described by Hieronymus (106), and these elements may be more likely to possess epidermal scales than a rhamphotheca anteriorly. If *Nigersaurus* possessed rhamphothecae, it is more likely that they are posterior elements potentially homologous to the latericorns and ramicornes of avian compound rhamphothecae (107).

Other diplodocoids possess anteriorly restricted teeth in the maxillae and dentaries as adults, whereas the tooth row extends much further posteriorly in juveniles of at least some taxa (108).

### ***Limusaurus***

Postnatal ontogenetic edentulism was recently described for this taxon (4). All other ceratosaurian theropods with known skull material have teeth, making the ontogenetic edentulism present in *Limusaurus* an independent case of edentulism in Theropoda.

### **Ornithomimosauria**

All Early Cretaceous ornithomimosaurids with known dentigerous elements have teeth, whereas all Late Cretaceous taxa are completely edentulous. The earliest diverging ornithomimosaurid with premaxillae, maxillae, and dentaries is *Pelecanimimus*, which has teeth in all three elements (109) indicating the regional edentulism in other Early Cretaceous ornithomimosaurids represent apomorphic reductions given the dentitions of ornithomimosaurid outgroups. Dentary teeth extend much further posteriorly than the maxillary teeth in *Pelecanimimus*. The maxillary tooth row ends anterior to the antorbital fenestra, at which point a sharp edge is present on the occlusal margin suggestive of a probable homologue of the avian latericorn along the posterior maxillae (107).

In *Harpymimus*, only dentary alveoli are present and they are restricted to the downturned

rostral portion of the bone where fossilized remnants of keratinous rhamphotheca are known in ornithomimid *Ornithomimus* and *Gallimimus* (110), and the upper jaw has acuminate oral margins on at least the maxillae [character information from (111)]. Though the lateral faces of the dentaries are smooth, the medial face of the edentulous anterior tip of the dentaries preserves impressed vascular grooves characteristic of a keratinous sheath (112) indicating the probable presence of a rhamphotheca anteriorly. Gastroliths are preserved in both *Nqwebasaurus* (113) and *Shenzhousaurus* (which has similar dental topology to *Harpymimus*) (114), as well as some Late Cretaceous ornithomimosaur (115, 116). Together, these data indicate the probable presence of a rhamphotheca and gastroliths in ornithomimosauria prior to the completely edentulous state of Late Cretaceous taxa (117). Fossilized remnants of presumably keratinous rhamphothecae are preserved in the Cretaceous ornithomimosaur *Gallimimus* and *Ornithomimus* (110).

### **Therizinosauria**

The non-therizinosaurid therizinosaurians *Falcarius* and *Eshanosaurus* have fully toothed dentaries, and *Falcarius* has maxillary teeth but premaxillae are unknown in both taxa and the maxilla is unknown in *Eshanosaurus* (118). *Jianchangosaurus* lacks teeth at the rostral tip of the dentary and has an edentulous premaxilla. Therizinosauridae have rostrally edentulous dentaries (119) and edentulous premaxillae (120).

### **EK Oviraptorosaurs**

The Early Cretaceous oviraptorosaurs *Ningyuansaurus* and *Incisivosaurus* have teeth in the premaxillae, maxillae, and dentaries. Though *Ningyuansaurus* is not well preserved and insufficiently described to determine the topology of the teeth at present, *Incisivosaurus* lacks dentition anteriorly in the dentary and has fewer teeth than *Ningyuansaurus* (121, 122). *Caudipteryx* has only premaxillary teeth and all Caenagnathidae and Oviraptoridae lack teeth as adults (123). *Caudipteryx* and *Incisivosaurus* have downturned oral margins of the dentaries, suggesting an epidermal structure such as a rhamphotheca was likely present to occlude with the premaxillary teeth in these taxa. Multiple *Caudipteryx* specimens preserve gastric mills (124), suggesting multiple secondary tools were present prior to complete edentulism in Oviraptorosauria.

### **Caenagnathidae**

As discussed in the main text, ontogenetic changes to the rostrum and teeth comparable to that in *Limusaurus* are likely present in caenagnathid oviraptorosaurs. Microtomographic or histological

data of embryonic Caenagnathidae (125) are necessary to determine if embryonic vestiges are present. Premaxillary teeth have been reported in a specimen of the caenagnathid *Avimimus* (126) (but are undescribed) while other specimens lack premaxillary teeth (127, 128), suggesting further intraspecific and possibly ontogenetic variation of the dentition in this clade.

### **Oviraptoridae**

No known oviraptorids have teeth in any jaw element and perinatal specimens lack teeth as well (129, 130). An initial phylogenetic reduction occurred along the stem of Caenagnathidae + Oviraptoridae (see EK oviraptorosaurs above) but it is not clear whether the edentulousness of post-juvenile Caenagnathidae and postnatal Oviraptoridae occurred independently or not. Microtomographic or histological data of embryonic oviraptoridae are necessary to determine if embryonic vestiges are present.

### **Scansoriopterygidae**

Teeth are restricted to the premaxillae and anterior dentary in juvenile and post-juvenile Scansoriopterygidae including *Epidendrosaurus* (131), *Epidexipteryx* (132), and *Yi* (133). An additional specimen of *Epidendrosaurus* (CAGS02-IG-gausa-I/DM 607, holotype of *Scansoriopteryx heilmanni*) appears to preserve teeth in the anterior dentary and premaxilla (Figure 5 in (134)), but these features were not described by Czerkas et al., and the specimen has not been examined firsthand by any of us. The presence of more complete dentitions in Early Cretaceous oviraptorosaurs and Jurassic avialans and deinonychosaurs indicates the condition in scansoriopterygidae is an apomorphic reduction of the posterior dentition.

### **Jeholornithiformes**

*Jeholornis prima* has teeth only in the anterior dentary, while *Jeholornis palmapenis* has poor preservation in the anterior dentary but possesses two maxillary alveoli and preserves one maxillary tooth. Given that *Archaeopteryx* and *Xiaotingia*, as well as Jurassic deinonychosaurs have complete dentitions, the state of *Jeholornis* indicates an initial phylogenetic reduction of the dentition.

A curious discrepancy in maxillary tooth count is present between *Jeholornis* specimens. An undescribed specimen of *Jeholornis* (BMC specimen # cf. *Jeholornis prima* cite Chiappe) preserves one maxillary tooth in a single maxillary alveolus, and large specimens of *Jeholornis prima* apparently lack maxillary teeth. It is tempting to suggest synonymy of *Jeholornis* species and

ontogenetic edentulism of the maxilla in this taxon, but other skeletal differences suggest *J. prima* and *J. palmapenis* are not conspecific, and further specimens are necessary to adequately test these hypotheses.

### **Confuciusornithidae**

All known Confuciusornithidae are completely edentulous, but the presence of teeth in *Jeholornis*, *Sapeornis*, and early-diverging Enantiornithes suggests the common ancestor of Pygostylia which gave rise to Confuciusornithidae likely possessed teeth, making the edentulousness of known Confuciusornithidae an independent evolution of complete edentulism. Known confuciusornithids show clear osteological correlates of rhamphothecae, and some specimens preserve rhamphotheca impressions (135), however it can not be assessed at this time whether a rhamphotheca was definitively present prior to complete adult edentulism.

### ***Sapeornis***

As discussed in the main text, ontogenetic changes to the rostrum and teeth comparable to that in *Limusaurus* are likely present in *Sapeornis*. All *Sapeornis* specimens have premaxillary and maxillary teeth, and secondary tools such as crops (136) and gastroliths (137) have been identified in this taxon. The unusual topological pattern of teeth in *Sapeornis* compared to closely related taxa such as Jeholornithiformes and early-diverging Ornithoraces suggests the pattern in *Sapeornis* results from an independent reduction.

### ***Gobipipus***

*Gobipipus* is known only from embryonic specimens which have ossified premaxillae, maxillae, and dentaries, but lack evidence of teeth (138). Adult teeth are inferred here to be absent in this taxon given the presence of embryonic teeth in toothed extant and fossil archosaurs, but microtomographic or histological data of embryonic *Gobipipus* are necessary to determine if embryonic tooth vestiges are present. Published photography and description of *Gobipipus* is insufficient to determine whether osteological correlates of a rhamphotheca were present other than acuminate edentulous oral margins. Embryos assigned to *Gobipteryx* (139) present a similar problem, though the taxonomic affinities of these specimens are currently unknown and there is possible synonymy between *Gobipteryx*, *Gobipipus* and/or *Nanantius*.

### ***Gobipteryx***

Post-juvenile specimens of *Gobipteryx* have acuminate, edentulous oral margins (140). The

oral margin of the premaxillae curves dorsally at its anterior extent, and obliquely oriented foramina exit on the surfaces of the premaxillae and dentaries (141). These structures are the best available evidence for rhamphothecae in Enantiornithes given the lack of clear osteological correlates in the enantiornithine embryos mentioned above (though we hypothesize rhamphothecae were likely present in those embryos).

### **Longipterygidae**

Longipterygidae have teeth in only the premaxillae and anterior portions of the dentaries. Given that earlier diverging Enantiornithes such as Pengornithidae have more complete dentitions, the condition in Longipterygidae represents an initial phylogenetic reduction.

### ***Archaeorhynchus***

*Archaeorhynchus* is completely edentulous in sub-adult specimens, and no juvenile specimens are known. Impressed vascular grooves, obliquely oriented foramina, and edentulous acuminate oral margins indicate the presence of a rhamphotheca, and gastroliths are present.

### ***Iteravis* + *Gansus zheni***

Both taxa have edentulous premaxillae and a toothed maxilla, a rostrally edentulous portion of the dentary, and an intersymphyseal dentary ossification (“prementary”). The premaxilla of *Gansus zheni* has an acuminate oral margin, but this condition cannot be assessed in *Iteravis* and these taxa lack otherwise obvious osteological correlates of rhamphothecae. Rhamphothecae are inferred given the absence of teeth anteriorly and the presence of osteological correlates of rhamphothecae in all other Ornithuromorpha. Both taxa have gastric mills.

### **Hongshanornithidae**

Despite appearing edentulous, alveoli have been identified on the premaxillae and maxillae in *Hongshanornis* and *Longicrusavis*, and the impressions of maxillary teeth have been identified in a new specimen of *Hongshanornis*. A crop has been identified in one specimen of *Hongshanornis* (136), and a separate specimen preserves a gastric mill.

### **Songlingornithidae**

*Yanornis*, *Yixianornis*, and *Songlingornis* each have dentition similar to other Cretaceous Ornithuromorpha—dentigerous premaxillae, maxillae, and dentaries with acuminate edentulous rostral portions of the premaxillae and an intersymphyseal ossification between the dentaries. A gastric mill is present in *Yanornis*

### **Hesperornithiformes**

*Hesperornis* and *Parahesperornis* have teeth in the maxillae and posterior dentaries. The premaxillae are edentulous, and there is an intersymphyseal ossification between the dentaries. This common topological pattern for the dentition suggests an initial phylogenetic reduction among early Ornithuromorpha. The edentulous premaxillae have an acuminate oral margin, and a lip on the interior of the premaxillae, presumably indicating a transition from keratinized, to non keratinized epithelium.

### **Neornithes**

All extant and fossil Neornithes are completely edentulous throughout postnatal ontogeny. An epithelial thickening presumably homologous to the dental lamina is identifiable in some, but not all chicken embryos (142).

## 7. Character Correlation Analysis

A comprehensive time-calibrated tree of Tetrapoda including extinct taxa is not available, character data is largely unavailable in the fossil record for several characters of interest (e.g., parity mode among extinct non-amniotes, caruncles for most extinct tetrapods), and preservation biases favor some characters over others (e.g. hard shelled eggs in terrestrial oviparous lineages) (Table S3). Therefore, an available time-calibrated tree of extant Tetrapoda (143) was used in this study as described in the main text.

### *Tree Construction*

The species level time-calibrated super-tree from Hedges et al. (143) (<http://www.biodiversitycenter.org/ttol>, “TTOL animals\_unsmoothed”) was pruned to include only Tetrapoda, and a dummy outgroup was added to root the tree as required for analysis in BayesTraits V3.0 (<http://www.evolution.rdg.ac.uk/BayesTraitsV3/BayesTraitsV3.html>). The node ages of crown group Archosauromorpha (turtles, crocodiles, and birds) and Archosauria (birds and crocodiles) were modified to conform with minimum divergence dates based on the fossil record.

A series of recent studies hypothesize that the enigmatic Permian reptile *Eunotosaurus* is the earliest-diverging known member of Testudinata (73, 74, 144, 145). Though *Eunotosaurus* and other early-diverging turtles have yet to be included in large-scale phylogenetic analyses of Archosauromorpha, analyses that constrain turtles to be closer to archosaurs than lepidosaurs show that Testudinata is one of the earliest diverging archosauromorph lineages, and certainly outside of Archosauriformes, indicating a Permian origin. Biostratigraphic studies show *Eunotosaurus* is recovered throughout the *Pristerognathus* Assemblage Zone of the South African Beaufort Group (146), and U-Pb geochronology places the recovered range of *Eunotosaurus* in the upper Capitanian Stage of the Permian (~260-261.5 Ma) (147). Therefore, the turtle-archosaur divergence likely occurred in the middle-late Guadalupian Stage of the Permian, and the date was adjusted to the Wordian-Capitanian boundary at 265.1 Ma (147).

The late Ladinian age recovered by Hedges et al. (143) for the crocodile-bird split (Archosauria) is anomalously young at 238.3 Ma. Multiple poposauroid pseudosuchians nested deeply within Pseudosuchia are known from late Early Triassic-early Middle Triassic (Olenakian-Anisian) sediments (148), and multiple members of Dinosauromorpha are known from Anisian sediments (149, 150). This suggests that the age of the Archosaurian node is at least in the Early Triassic (~252-



247Ma) and probably in the Late Permian (Wuchiapingian-Changshingian) or Early Triassic (Induan). The archosaurian divergence date was adjusted to the Permian-Triassic boundary at 252.17Ma (147).

### ***Character Definitions and Sources of Data***

Terrestrial Oviparity: absent (0); present (1);

Taxa that undergo development inside of an egg and outside of the mother were classified as oviparous, whereas taxa that are hatched at parturition or hatch immediately upon parturition (“ovoviviparity”) were considered viviparous (151). All taxa that lay eggs on land or vegetation without sustained contact with standing water during development were considered terrestrially oviparous.

Parity modes are diverse within Lissamphibia, and terrestrial oviparity is present within each major lineage. Within Gymnophiona, all oviparous caecilians guard their eggs in terrestrial nests and terrestrial oviparity is the plesiomorphic condition for the crown clade (152). Parity mode data were collected from Kupfer et al. (152), Nishikawa et al. (153), Duellmann and Trueb (154). Among Caudata, Plethodontidae lay terrestrial eggs and have eliminated the aquatic phase from their life cycle (155). Most Ambystomatidae lay eggs in water, but *Ambystoma opacum* and *A. cingulatum* lay eggs on land and were coded as state 1 (156). *A. talpoideum* has facultatively terrestrial oviparity (157) and was coded as uncertain (-). All other salamanders require standing or running water for nest sites, and aquatic oviparity is plesiomorphic for crown salamanders. Anurans are aquatically oviparous plesiomorphically, but evolve terrestrial oviparity numerous times (151). Parity mode data were collected from Gomez-Mestre et al. (158). All mammals are viviparous (state 0) except the monotremes *Ornithorhynchus*, *Zaglossus*, and *Tachyglossus*, which lay eggs on land. There are frequent transitions from terrestrial oviparity to viviparity within Squamata, and parity mode data were taken from (151). All extant birds and crocodylians lay eggs on land or in floating vegetation nests (state 1); and though eggs can not be assigned to species with certainty the extinct Dinornithiformes included in the tree were coded as state 1 (159). Nearly all turtles are terrestrially oviparous, but *Dermatemys mawii* and *Chelodina rugosa* both lay eggs either in shallow water or near the water line, embryos can survive submerged in meters of water for weeks at a time, and hatching is timed to coincide with the beginning of the wet season (160-163). Though dry conditions

are necessary for the embryos to develop, these taxa were coded as state 0 to create maximum discordance between the hypothesized correlated relationship between terrestrial oviparity and the evolution of caruncles.

Caruncle: absent (0); present (1);

Caruncles are transient, epidermal structures that can serve multiple functions (164, 165), but are thought to assist mainly in the process of egg-pipping or protection of the embryo during egg-pipping. Some terrestrial direct-developing frogs bear keratinous caruncles perinatally, and data were collected from species accounts in the literature. Monotremes possess both a caruncle and a true egg tooth, and while some marsupials retain vestiges of caruncles or egg teeth, these are non-functional at hatching and all therian mammals were coded as absent (36). All extant turtles and crocodylians bear caruncles. Nearly all birds possess caruncles, often on both the upper and lower jaws. Megapodidae and some Paleognathae lack a caruncle, including *Apteryx*, *Struthio*, and *Casuarius*. Dinornithiformes were coded as uncertain (-).

Mineralized Columnar Shell Units: absent (0); present (1).

All extant crocodylians and birds possess rigid-shelled eggs with columnar calcitic shell units, while mineralized columnar eggshell units are absent in all extant amphibians and mammals (166), and most Lepidosauromorpha. Many Lepidosauromorpha possess a thin granular calcitic crust at the eggshell exterior (167), but among extant taxa only Dibamidae (168, 169) and Gekkonoidea (Gekkonidae + Sphaerodactylidae + Phyllodactylidae) (170) lay rigid shelled eggs (state 1). Tuataras (*Sphenodon*) and the Eastern Bearded Dragon (*Pogona barbata*) lay eggs that are often described as pliable-shelled, but columnar calcitic shell units are dispersed throughout the shell and penetrate the entire thickness of the shell membrane (171); these taxa were coded as state 1.

Nearly all turtles possess eggshells with distinct shell units at the exterior of the embryonic membranes. Eggs of Emydidae, Cheloniidae, Chelydridae, and others are sometimes described as pliable-shelled, but all possess discrete aragonitic shell units. Only some Pelomedusidae (e.g., *Pelusios sinuatus*) have a thin granular crust at the egg exterior similar to most squamates and lack discrete columnar shell units (172).

Rhamphotheca: absent (0); present (1).

Rhamphothecae are defined as keratinous sheaths with acuminate edges covering edentulous oral epithelia of premaxillae, maxillae, and dentaries (or other bony elements of the oral margin, e.g. the rostral and prementary bones of ornithischian dinosaurs and the intersymphyseal ossification in non-neornithine Ornithuromorpha and Pelagornithidae). *Ornithorhynchus*, birds, and turtles were scored as possessing a rhamphotheca (1), and all other taxa were scored as absent (0) or unknown (-).

Many frogs possess beaks as larvae, but were scored as absent because these beaks are supported by neomorphic cartilages rather than homologues of dentigerous bones (173); and because of the necessity to compare structures at comparable ontogenetic stages where possible within phylogenetic contexts (174). The frog *Rhinophrynus* possesses a heavily keratinized rostrum, though the keratin is present as spicules inside the rostral epidermal cells and not as a keratinous sheath (absent). The echidna rostrum is frequently referred to as a beak, and though keratinous oral appendages are present, a keratinous sheath does not cover the occlusal surface of the aforementioned elements (absent). Some squamates including diplodactylid geckos, ‘scoleophidian’ and colubroid snakes, and amphisbaenians possess enlarged or otherwise elaborated rostral and mental scales. The enlarged scales in most diplodactylid geckos do not overgrow toothed elements, and we know of no geckos in which regional edentulism is present. The presence and distribution of teeth have not been described to our knowledge in some Australian myrmecophagous geckos in the genera *Rhynchoedura* (“beaked geckos”) and *Diplodactylus*. These taxa are of interest given the tendency towards toothlessness in myrmecophagous mammals and were scored as unknown. While edentulous premaxillae may facilitate evolution of rostral scale elaborations in snakes and amphisbaenians, these scales do not appear to cover oral epithelium in any taxon and all snakes were scored as absent.

### **Modeling**

Each set of hypothesized dependent characters was modeled using Bayesian searches for the independent and dependent models of evolution for binary discrete characters in BayesTraits V3.0 (<http://www.evolution.rdg.ac.uk/BayesTraitsV3/BayesTraitsV3.html>). The commands below were used to set priors and burn-in, the model was sampled every 100 generations, and run for 2,000,000 generations in MCMC analyses.

PriorAll exp 10  
Stones 100 1000  
Burnin 0  
Sample 100  
run

Convergence and effective sample sizes of all model parameters were assessed in Tracer v1.6.0 (<http://tree.bio.ed.ac.uk/software/tracer/>) using a 10% burn-in, and mean likelihood values calculated by Tracer were used to conduct likelihood ratio tests. Likelihood ratio tests were calculated using the “lrttest” function from the “BioGeoBEARS” package (175) in R (176).

### *Results*

State-dependent character correlations between terrestrial oviparity and each other examined character were significantly more likely than independent models (Table S1). The co-distribution of terrestrial oviparity and caruncles represents a “replicated burst” scenario sensu Maddison and Fitzjohn, Figure 1 in (177), whereby the evolution of caruncles is homoplastically distributed with origins in multiple lineages of terrestrially oviparous frogs and either a single origin or multiple early origins in amniotes. This contrasts with the co-distributions of columnar eggshell units and rhamphothecae with terrestrial oviparity. These distributions more closely match an “unreplicated burst” scenario (177), whereby each of columnar eggshell units and rhamphothecae have multiple origins within terrestrially oviparous amniote lineages, but these bursts are not replicated in terrestrially oviparous amphibians, nor is there a hypothesized functional link between each set of characters.

A state-dependent character correlation between caruncles and rhamphothecae was also significantly more likely than an independent model. The co-distribution of caruncles and rhamphothecae may represent a “replicated burst” or an “unreplicated burst” scenario, depending on whether there was a single origin of caruncles in the most recent common ancestor of amniotes or there were separate origins in Mammalia, Rhynchocephalia, and Archosauromorpha.

A state-dependent character model was rejected for associations between columnar eggshell units and both caruncles and rhamphothecae. The infrequent origins of each character among extant taxa likely contributed to these results.

### *Discussion*

We interpret the evolution of terrestrial oviparity and caruncles as correlated, and of caruncles and rhamphothecae as correlated based on the significance of the state-dependent models, the co-distribution patterns of character states, and reason to suggest these characters are functionally related. The susceptibility of character correlation tests to Type I error is concerning, however criteria recently outlined by Maddison and Fitzjohn (177) for inferring character correlations are instructive. The “replicated burst” co-distribution of terrestrial oviparity and caruncles shows that the evolution of a caruncle is always nested within a terrestrially oviparous lineage, but that the acquisition of these features is not necessary, nor is it always rapid. The repeated acquisition of caruncles in terrestrially oviparous frog lineages and in amniotes (either once ancestrally or multiple independent acquisitions), the acquisition of true egg-teeth in squamates, and the loss of caruncles and/or egg-teeth in viviparous mammals and squamates suggests that egg-pipping structures are advantageous for overcoming challenges posed by changes in egg structure frequently present in terrestrial egg-layers, and are disadvantageous and/or unnecessary when functional constraints related to terrestrial oviparity are removed.

The frequent evolution of rhamphothecae within Archosauromorpha and once within monotremes most likely represents the “unreplicated burst” scenario of Maddison and Fitzjohn. Parsimony optimization for the presence of caruncles is ambiguous for the most recent common ancestor of amniotes when the feature is scored as absent for marsupials and placental mammals. However, vestiges of a caruncle are present in some marsupials and monotremes, suggesting that the presence of this feature is plesiomorphic for crown Mammalia. Given the frequent evolution of rhamphothecae within Archosauromorpha, but only a single origin within Monotremata, and no origins in terrestrially oviparous frogs which possess caruncles, the co-distribution of these features alone is not a strong argument for their correlation. Maddison and Fitzjohn (177) argue that a significant correlation between two traits should not necessarily be drawn in an “unreplicated burst” scenario on the grounds that it can not be distinguished from coincidence. However, the topological association of caruncle and rhamphotheca development *in ovo* allays the possibility of Type I error due to coincidence in this case.

The likelihood ratio tests favored a state-dependent model for correlated evolution between terrestrial oviparity and mineralized columnar eggshell units, and between terrestrial oviparity and rhamphothecae. We interpret both of these correlations as Type I errors given the “unreplicated burst”

co-distributions in each case, and no functional or developmental links between the characters.

The likelihood ratio tests for mineralized columnar eggshell units with each of caruncles and rhamphothecae both favored the independent model and are therefore uncorrelated. Because one of the hypothesized functions of caruncles is to protect the embryo's rostrum during pipping, we hypothesized that the evolution of caruncles was correlated with the presence of columnar eggshell units given the acuminate shape of mammillary cones facing the interior of amniotic eggs.

## 8. Image Attributions

The silhouettes used in Figures 3 and S3 were either drawn by the authors, based on images in the public domain, or based on images made available under a Creative Commons License (<https://creativecommons.org/licenses/by-nc-sa/3.0/>). Attributions for the latter category are listed below and many of the images were hosted by [phylopic.org](http://phylopic.org). The silhouette for Hesperornithiformes was modified after (178). The silhouette for *Anatosuchus* was modified after (85).

Istiodactylidae—modified after Dmitry Bogdanov;

Confuciusornithidae—modified after Conty;

*Stegosaurus*—modified after Andrew Farke;

*Huanhepterus*, Jeholornithiformes, *Nigersaurus*, Ornithomimosauria, Silesauridae, and Therizinosauroidea—modified after Scott Hartman;

Dsungaripteridae, *Henodus*, *Macelognathus*, Plachochelyidae—modified after Jamie Headden;

Odontoceti and Mysticeti—modified after Chris Huh;

*Campylognathoides*—modified after Maija Karala;

EK Oviraptorosaurs, Gallodactylidae, *Germanodactylus*, Pteranodontidae, *Sapeornis*, Songlingornithidae, and Hongshanornithidae—modified after Matt Martyniuk;

Nyctosauridae, Rhamphorhynchinae, Shastasauridae, Thunnosauria—modified after Gareth Monger;

Azhdarchoidea—modified after Darren Naish;

Hupehsuchia—modified after Wikimedia Commons user Smokeybjb;

Askeptosauroidea, *Hypuronektor*, Leptonectidae, Longipterygidae, Nasorostra, *Sapheosaurus*, Testudinata, *Xinpusaurus*—modified after Nobu Tamura;

Monotremata, *Lotosaurus* + Shuvosauridae—modified after Sarah Werning;

Oviraptoridae and Scansoriopterygidae—modified after Emily Willoughby.



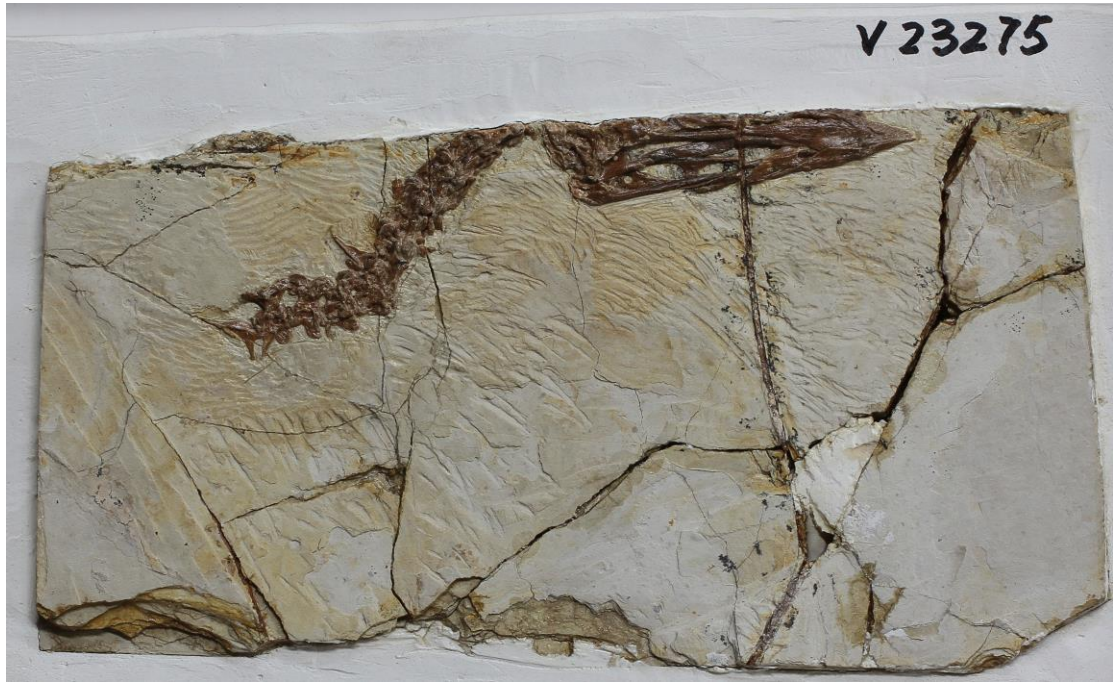

Figure S1 | Stereophoto of *Confuciusornis* sp. IVPP V23275.

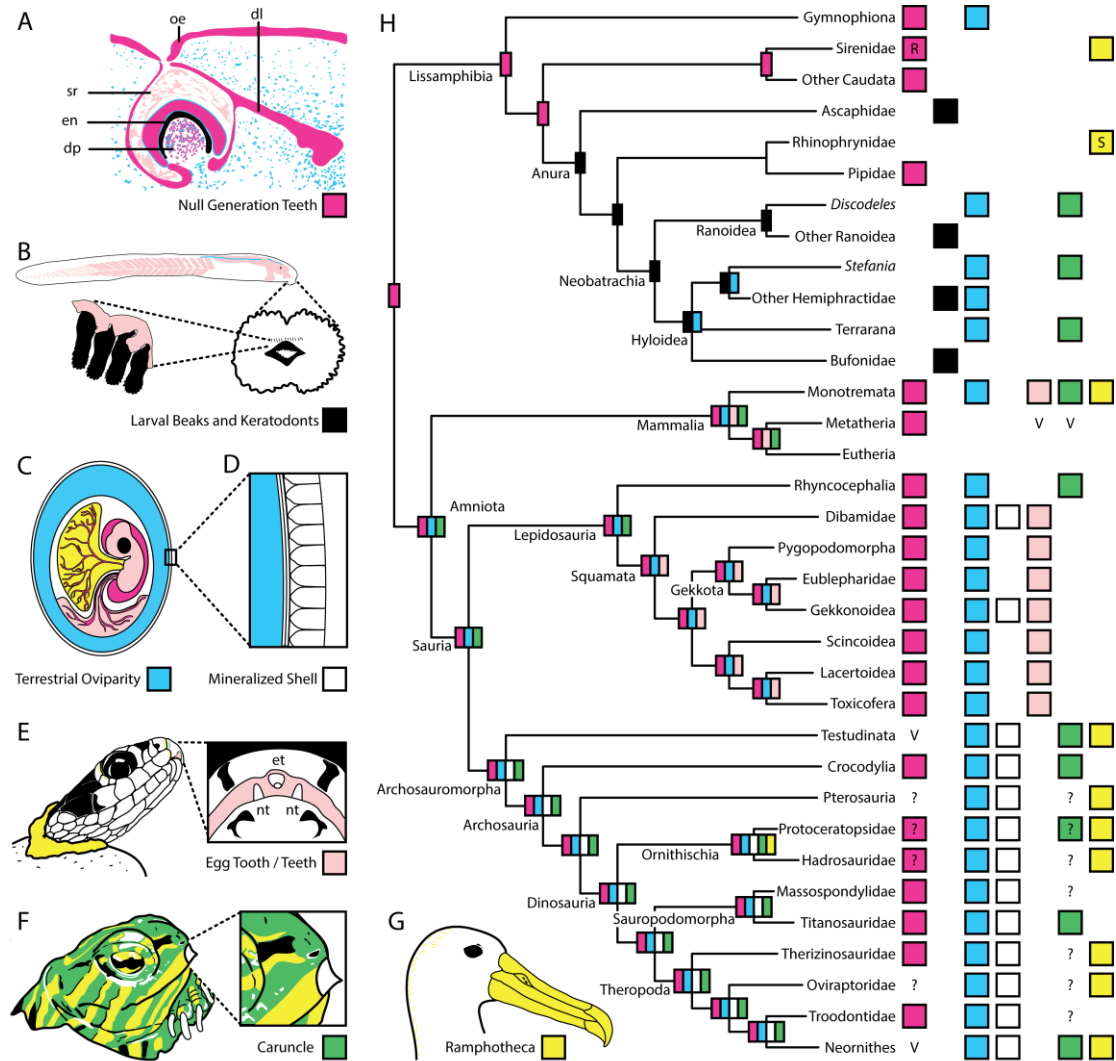

**Figure S2 | Characters involved in egg pipping and keratinous beak development, and their phylogenetic distributions among selected extant tetrapods and Mesozoic dinosaur lineages.** (A-G) Character illustrations showing A, unerupted null generation tooth (in *Crocodylus niloticus*, after (179)); B, keratinous larval mouth parts in *Leptolalax dringi* after (180); C, generalized cleidoic egg; D, close-up of egg cross section showing membrana testacea; E, true egg tooth (in *Natrix natrix*, after (181)); F, caruncle (in *Chrysemys picta*); G, keratinous rhamphotheca (in *Phoebastria irrorata*). H, phylogenetic relationships of extant tetrapods with optimization of character states shown in G. dl, dental lamina; dp, dental papilla; en, enamel; et, egg tooth; nt, null generation tooth; oe, oral epithelium; sr, stellate reticulum; R, resorption of marginal dentition as adult rhamphotheca appears; S, spicules of keratin in rostral cells form the rhamphotheca; V, vestigial.

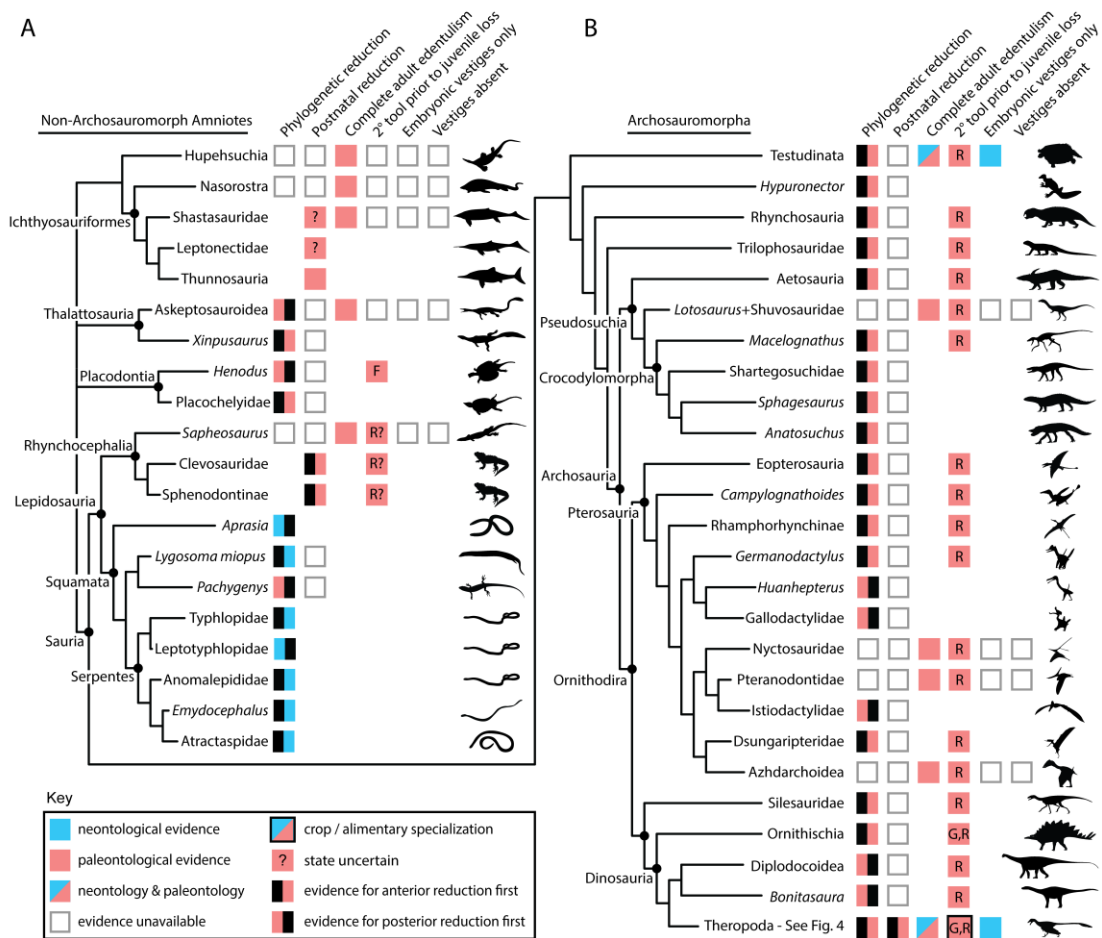

**Figure S3 | Summary of evidence for the macroevolution of edentulism in Diapsida.** A, evidence from non-archosauromorph diapsid lineages with partial to complete edentulism, showing tendency towards dental reduction in aquatic and burrowing lineages that lack hard-shelled oviparity. B, evidence from Archosauromorpha showing repeated independent evolution of anteriorly originated tooth loss accompanied by rhamphothecae. ?, hypothesized state/partial evidence; F, filtration; G, gastric mill/ gizzard; R, rhamphotheca. Taxon silhouettes not to scale.

**Table S1 | Selected measurements and characters of mandibles referred to Caenagnathidae**

| Specimen Number        | Genus                  | Shortest Symphyseal Length (mm) | Dentary Height behind symphysis (mm) | Some Interdental Septa Contact Lingual Ridge | Width between septa (mm) | Vestigial Dentary Alveoli | References |
|------------------------|------------------------|---------------------------------|--------------------------------------|----------------------------------------------|--------------------------|---------------------------|------------|
| MPC-D 107/17           | -                      | ~65                             | 109                                  | No                                           | ~7                       | 8                         | (182)      |
| CM 78000               | <i>Anzu</i>            | >70                             | 25                                   | No                                           | ~7.5                     | 4?                        | (183)      |
| CMN 8776               | ? <i>Chirostenotes</i> | 61.9                            | 17.4                                 | No                                           | ~8.5                     | 6                         | (184)      |
| TMP 1990.56.6          | ? <i>Chirostenotes</i> | 46.5                            | 25                                   | No                                           | ~6                       | 6                         | (184)      |
| TMP 2001.12.12         | ? <i>Chirostenotes</i> | 32.8                            | 20.4                                 | No                                           | ~7                       | 4-5                       | (185)      |
| TMP 1992.40.44         | ? <i>Chirostenotes</i> | 32                              | 21.7                                 | -                                            | -                        | -                         | (184)      |
| TMP 1992.36.390        | ? <i>Chirostenotes</i> | 29.6                            | 18.4                                 | No                                           | ~3.4                     | 6                         | (184)      |
| TMP 1991.144.1         | ? <i>Chirostenotes</i> | 27.2                            | >12.3                                | No                                           | ~4                       | 4                         | (184)      |
| TMM 45920-1            | <i>Leptorhynchus</i>   | ~24.8                           | ~20                                  | -                                            | -                        | -                         | (184)      |
| TMP 1979.8.622         | ? <i>Chirostenotes</i> | >21                             | >13                                  | No                                           | -                        | -                         | (184)      |
| MPC-D 102/107          | -                      | ~20                             | 20                                   | No                                           | ~4.3                     | 6                         | (186)      |
| CCMGE 402/12457        | <i>Caenagnathasia</i>  | >10                             | 9                                    | Yes                                          | ~2.5                     | 6-7                       | (184)      |
| CCMGE 401/12457        | <i>Caenagnathasia</i>  | 11.2                            | 8.3                                  | Yes                                          | ~2.1                     | ≥3                        | (184, 187) |
| IVPP 20377             | -                      | 7.3                             | 6.7                                  | Yes                                          | 1.9                      | ≥4                        |            |
| ZIN PH 2354/16 (CBI-4) | <i>Caenagnathasia</i>  | ~7                              | ~3.19                                | Yes                                          | ~1.6                     | 6-7                       | (187)      |

~, approximate measurement based on photograph and scale;

**Table S2 | Selected measurements and characters of specimens referred to *Sapeornis***

| Specimen Number   | Femoral Length (mm) | Tibial Length (mm) | Histological Data      | Dentary Teeth | Vestigial Dentary Alveoli | References    |
|-------------------|---------------------|--------------------|------------------------|---------------|---------------------------|---------------|
| STM15-29          | # 48?               | # 55?              | -                      | ?             | ?                         | (136, 188)    |
| STM 15-66         | 54                  | -                  | -                      | 2             | ?                         | (136)         |
| STM 15-43         | 56                  | -                  | -                      | 2             | ?                         | (136)         |
| DNHM-D3078        | 56.7                | 62.8               | 0 LAGs                 | ?             | ?                         | (136)         |
| STM 15-6          | 57                  | -                  | 0 LAGs                 | ?             | ?                         | (2, 188)      |
| STM 16-15         | 58                  | -                  | -                      | 2             | ?                         | (2)           |
| LPM B00015        | -                   | -                  | -                      | 1?            | 6-7                       | present paper |
| IVPP V13396       | 58.3                | 68.5               | -                      | 1?            | ?                         | (2, 189)      |
| STM 16-18         | 59.1                | 64.9               | -                      | 2             | 5                         | (188)         |
| CAGS02-IG-gausa-3 | 61                  | 67                 | -                      | ?             | ?                         | (2)           |
| LPM B00018        | 61.8                | 65                 | -                      | 1?            | ?                         | (190)         |
| STM 15-8          | 63                  | -                  | -                      | 2?            | ?                         | (2)           |
| HGM-41HIII0405    | 65                  | 71                 | -                      | ?             | 2?                        | (191)         |
| JZPM-LSV-130      | 68                  | 78                 | -                      | ≥ 1           | ?                         | (192)         |
| STM 15-17         | 68                  | -                  | -                      | 1?            | ?                         | (2)           |
| STM 15-60         | 68                  | -                  | -                      | 1?            | ?                         | (193)         |
| STM 15-5          | 70                  | -                  | -                      | 1?            | ?                         | (194)         |
| STM 15-7          | 70                  | -                  | -                      | 2             | 1-3?                      | (2)           |
| STM 15-64         | 70                  | -                  | -                      | 1?            | ?                         | (2)           |
| STM 15-68         | 70                  | -                  | -                      | 2?            | ?                         | (2)           |
| DNHM-D2523        | 71                  | 85.7               | -                      | ?             | ?                         | (2)           |
| IVPP V13276       | 72.1                | 85.3               | -                      | ?             | ?                         | (2)           |
| IVPP V13275       | 74.1                | 81.2               | -                      | ≥ 1           | ?                         | (2)           |
| STM 15-27         | 75                  | -                  | -                      | 2             | ?                         | (136)         |
| STM 15-38         | 75                  | -                  | -                      | 1?            | ?                         | (189)         |
| STM 15-46         | 75                  | -                  | -                      | 2?            | ?                         | (136)         |
| STM 15-32         | 75                  | -                  | 1 double LAG, ICL, OCL | ?             | ?                         | (137)         |
| BMNHC-PH1067      | 75.9                | 84.9               | -                      | 0             | 1?                        | (136)         |
| STM 15-15         | 76                  | -                  | -                      | ?             | ?                         | (137)         |
| LPM B00166        | 80                  | 84.9               | 1 LAG                  | ?             | ?                         | (2, 195)      |
| CDPC0208001       | 80                  | 90                 | -                      | ?             | ?                         | (2)           |
| IVPP V12698       | 80.4                | 83.6               | -                      | ?             | ?                         | (2)           |
| STM 15-70         | 81                  | -                  | 1 LAG, ICL             | ?             | ?                         | (188)         |
| DNHM-D1197        | -                   | 94.6               | -                      | ?             | ?                         | (196, 197)    |
| STM 15-29         | # 93?               | # 105?             | -                      | ?             | ?                         | (136, 188)    |

\* indicates the estimated complete length of a partial element; -, measurement not available; ?, uncertainty; rows in bold are specimens with identifiable dentary alveolar vestiges. #, the reported femoral length in (188) is inconsistent with the scale of Fig. 2 in (136). STM 15-29 is either the largest or smallest reported *Sapeornis* specimen. LAG, line of arrested growth, ICL, inner circumferential layer, OCL, outer circumferential layer.

**Table S3. Tests of Phylogenetic Character Correlations**

| Characters                       | I (LnL) | D (LnL) | p                     |
|----------------------------------|---------|---------|-----------------------|
| Terr. Oviparity - Columnar Units | -1124.7 | -1003.5 | *2.82e <sup>-51</sup> |
| Terr. Oviparity - Caruncle       | -1139.8 | -1047.7 | *9.34e <sup>-39</sup> |
| Terr. Oviparity - Rhamphotheca   | -1083.0 | -1009.0 | *5.46e <sup>-31</sup> |
| Columnar Units - Caruncle        | -163.5  | -160.0  | 0.1468                |
| Columnar Units - Rhamphotheca    | -65.3   | -63.2   | 0.3796                |
| Caruncle - Rhamphotheca          | -147.9  | -137.1  | *0.0003               |

D, dependent model; I, independent model; LnL, mean log-likelihood; \*, dependent model is significantly more likely at a level >0.0001.

**Table S4 | Character Correlation Data**

A – Terrestrial Oviparity (absent = 0, present = 1)

B – Mineralized Columnar Eggshell Units (absent = 0, present = 1)

C – Caruncle (absent = 0, present = 1)

D – Rhamphotheca (absent = 0, present = 1)

| <b>Taxon</b>                         | <b>A</b> | <b>B</b> | <b>C</b> | <b>D</b> |
|--------------------------------------|----------|----------|----------|----------|
| <i>Outgroup</i>                      | -        | -        | -        | -        |
| <b>Gymnophiona</b>                   | <b>A</b> | <b>B</b> | <b>C</b> | <b>D</b> |
| <i>Boulengerula_boulengeri</i>       | 1        | 0        | 0        | 0        |
| <i>Boulengerula_taitana</i>          | 1        | 0        | 0        | 0        |
| <i>Boulengerula_uluguruensis</i>     | -        | 0        | 0        | 0        |
| <i>Caecilia_tentaculata</i>          | 1        | 0        | 0        | 0        |
| <i>Caecilia_volcani</i>              | -        | 0        | 0        | 0        |
| <i>Caudacaecilia_asplenia</i>        | 1        | 0        | 0        | 0        |
| <i>Chthonerpeton_indistinctum</i>    | 0        | 0        | 0        | 0        |
| <i>Crotaphatrema_tchabalmboensis</i> | -        | 0        | 0        | 0        |
| <i>Dermophis_mexicanus</i>           | 0        | 0        | 0        | 0        |
| <i>Dermophis_oaxacae</i>             | -        | 0        | 0        | 0        |
| <i>Dermophis_parviceps</i>           | 0        | 0        | 0        | 0        |
| <i>Epicrionops_marmoratus</i>        | 1        | 0        | 0        | 0        |
| <i>Epicrionops_niger</i>             | 1        | 0        | 0        | 0        |
| <i>Gegeneophis_ramaswamii</i>        | 1        | 0        | 0        | 0        |
| <i>Gegeneophis_seshachari</i>        | 0        | 0        | 0        | 0        |
| <i>Geotrypetes_seraphini</i>         | 0        | 0        | 0        | 0        |
| <i>Grandisonia_alternans</i>         | 1        | 0        | 0        | 0        |
| <i>Grandisonia_brevis</i>            | 1        | 0        | 0        | 0        |
| <i>Grandisonia_larvata</i>           | 1        | 0        | 0        | 0        |
| <i>Grandisonia_sechellensis</i>      | 1        | 0        | 0        | 0        |
| <i>Gymnopsis_multiplicata</i>        | 0        | 0        | 0        | 0        |
| <i>Herpele_squalostoma</i>           | 1        | 0        | 0        | 0        |
| <i>Hypogeophis_rostratus</i>         | 1        | 0        | 0        | 0        |
| <i>Ichthyophis_bannanicus</i>        | 1        | 0        | 0        | 0        |
| <i>Ichthyophis_bombayensis</i>       | 1        | 0        | 0        | 0        |
| <i>Ichthyophis_glutinosus</i>        | 1        | 0        | 0        | 0        |
| <i>Ichthyophis_orthoplicatus</i>     | 1        | 0        | 0        | 0        |
| <i>Ichthyophis_tricolor</i>          | 1        | 0        | 0        | 0        |
| <i>Luetkenotyphlus_brasiliensis</i>  | -        | 0        | 0        | 0        |
| <i>Microcaecilia_sp._PZ-2009</i>     | 1        | 0        | 0        | 0        |
| <i>Oascaecilia_ochrocephala</i>      | 1        | 0        | 0        | 0        |
| <i>Praslinia_cooperi</i>             | -        | 0        | 0        | 0        |
| <i>Rhinatrema_bivittatum</i>         | 1        | 0        | 0        | 0        |
| <i>Schistometopum_gregorii</i>       | 0        | 0        | 0        | 0        |

|                                           |   |   |   |   |
|-------------------------------------------|---|---|---|---|
| <i>Schistometopum thomense</i>            | 0 | 0 | 0 | 0 |
| <i>Scolecormorphus uluguruensis</i>       | 0 | 0 | 0 | 0 |
| <i>Scolecormorphus vittatus</i>           | 0 | 0 | 0 | 0 |
| <i>Siphonops annulatus</i>                | 1 | 0 | 0 | 0 |
| <i>Siphonops hardyi</i>                   | - | 0 | 0 | 0 |
| <i>Siphonops paulensis</i>                | 1 | 0 | 0 | 0 |
| <i>Typhlonectes natans</i>                | 0 | 0 | 0 | 0 |
| <i>Uraeotyphlus cf. oxyurus</i> MW-212    | - | 0 | 0 | 0 |
| <b>Caudata</b>                            |   |   |   |   |
| <i>Ambystoma andersoni</i>                | 0 | 0 | 0 | 0 |
| <i>Ambystoma barbouri</i>                 | 0 | 0 | 0 | 0 |
| <i>Ambystoma californiense</i>            | 0 | 0 | 0 | 0 |
| <i>Ambystoma cingulatum</i>               | 1 | 0 | 0 | 0 |
| <i>Ambystoma dumerilii</i>                | 0 | 0 | 0 | 0 |
| <i>Ambystoma gracile</i>                  | 0 | 0 | 0 | 0 |
| <i>Ambystoma jeffersonianum</i>           | 0 | 0 | 0 | 0 |
| <i>Ambystoma laterale</i>                 | 0 | 0 | 0 | 0 |
| <i>Ambystoma mabeei</i>                   | 0 | 0 | 0 | 0 |
| <i>Ambystoma macrodactylum</i>            | 0 | 0 | 0 | 0 |
| <i>Ambystoma maculatum</i>                | 0 | 0 | 0 | 0 |
| <i>Ambystoma mexicanum</i>                | 0 | 0 | 0 | 0 |
| <i>Ambystoma opacum</i>                   | 1 | 0 | 0 | 0 |
| <i>Ambystoma ordinarium</i>               | 0 | 0 | 0 | 0 |
| <i>Ambystoma talpoideum</i>               | - | 0 | 0 | 0 |
| <i>Ambystoma texanum</i>                  | 0 | 0 | 0 | 0 |
| <i>Ambystoma tigrinum</i>                 | 0 | 0 | 0 | 0 |
| <i>Ambystoma unisexual_hybrid_complex</i> | 0 | 0 | 0 | 0 |
| <i>Amphiuma means</i>                     | 0 | 0 | 0 | 0 |
| <i>Amphiuma pholeter</i>                  | 0 | 0 | 0 | 0 |
| <i>Amphiuma tridactylum</i>               | 0 | 0 | 0 | 0 |
| <i>Andrias davidianus</i>                 | 0 | 0 | 0 | 0 |
| <i>Andrias japonicus</i>                  | 0 | 0 | 0 | 0 |
| <i>Aneides aeneus</i>                     | 1 | 0 | 0 | 0 |
| <i>Aneides ferreus</i>                    | 1 | 0 | 0 | 0 |
| <i>Aneides flavipunctatus</i>             | 1 | 0 | 0 | 0 |
| <i>Aneides hardii</i>                     | 1 | 0 | 0 | 0 |
| <i>Aneides lugubris</i>                   | 1 | 0 | 0 | 0 |
| <i>Aneides yagrans</i>                    | 1 | 0 | 0 | 0 |
| <i>Batrachoseps attenuatus</i>            | 1 | 0 | 0 | 0 |
| <i>Batrachoseps campi</i>                 | 1 | 0 | 0 | 0 |
| <i>Batrachoseps diabolicus</i>            | 1 | 0 | 0 | 0 |
| <i>Batrachoseps gabrieli</i>              | 1 | 0 | 0 | 0 |
| <i>Batrachoseps gavilanensis</i>          | 1 | 0 | 0 | 0 |
| <i>Batrachoseps gregarius</i>             | 1 | 0 | 0 | 0 |



|                                   |   |   |   |   |
|-----------------------------------|---|---|---|---|
| <i>Batrachoseps_incognitus</i>    | 1 | 0 | 0 | 0 |
| <i>Batrachoseps_kawia</i>         | 1 | 0 | 0 | 0 |
| <i>Batrachoseps_luciae</i>        | 1 | 0 | 0 | 0 |
| <i>Batrachoseps_major</i>         | 1 | 0 | 0 | 0 |
| <i>Batrachoseps_minor</i>         | 1 | 0 | 0 | 0 |
| <i>Batrachoseps_nigriventris</i>  | 1 | 0 | 0 | 0 |
| <i>Batrachoseps_pacificus</i>     | 1 | 0 | 0 | 0 |
| <i>Batrachoseps_regius</i>        | 1 | 0 | 0 | 0 |
| <i>Batrachoseps_relictus</i>      | 1 | 0 | 0 | 0 |
| <i>Batrachoseps_simatus</i>       | 1 | 0 | 0 | 0 |
| <i>Batrachoseps_wrighti</i>       | 1 | 0 | 0 | 0 |
| <i>Batrachuperus_karlschmidti</i> | 0 | 0 | 0 | 0 |
| <i>Batrachuperus_londongensis</i> | 0 | 0 | 0 | 0 |
| <i>Batrachuperus_pinchonii</i>    | 0 | 0 | 0 | 0 |
| <i>Batrachuperus_tibetanus</i>    | 0 | 0 | 0 | 0 |
| <i>Batrachuperus_yenyuanensis</i> | 0 | 0 | 0 | 0 |
| <i>Bolitoglossa_adspersa</i>      | 1 | 0 | 0 | 0 |
| <i>Bolitoglossa_altamazonica</i>  | 1 | 0 | 0 | 0 |
| <i>Bolitoglossa_alvaradoi</i>     | 1 | 0 | 0 | 0 |
| <i>Bolitoglossa_biseriata</i>     | 1 | 0 | 0 | 0 |
| <i>Bolitoglossa_carri</i>         | 1 | 0 | 0 | 0 |
| <i>Bolitoglossa_celaque</i>       | 1 | 0 | 0 | 0 |
| <i>Bolitoglossa_cerroensis</i>    | 1 | 0 | 0 | 0 |
| <i>Bolitoglossa_colonnea</i>      | 1 | 0 | 0 | 0 |
| <i>Bolitoglossa_conanti</i>       | 1 | 0 | 0 | 0 |
| <i>Bolitoglossa_decora</i>        | 1 | 0 | 0 | 0 |
| <i>Bolitoglossa_diaphora</i>      | 1 | 0 | 0 | 0 |
| <i>Bolitoglossa_dofleini</i>      | 1 | 0 | 0 | 0 |
| <i>Bolitoglossa_dunni</i>         | 1 | 0 | 0 | 0 |
| <i>Bolitoglossa_engelhardti</i>   | 1 | 0 | 0 | 0 |
| <i>Bolitoglossa_epimela</i>       | 1 | 0 | 0 | 0 |
| <i>Bolitoglossa_equatoriana</i>   | 1 | 0 | 0 | 0 |
| <i>Bolitoglossa_flavimembris</i>  | 1 | 0 | 0 | 0 |
| <i>Bolitoglossa_flaviventris</i>  | 1 | 0 | 0 | 0 |
| <i>Bolitoglossa_franklini</i>     | 1 | 0 | 0 | 0 |
| <i>Bolitoglossa_gracilis</i>      | 1 | 0 | 0 | 0 |
| <i>Bolitoglossa_hartwegi</i>      | 1 | 0 | 0 | 0 |
| <i>Bolitoglossa_helmrichi</i>     | 1 | 0 | 0 | 0 |
| <i>Bolitoglossa_hermosa</i>       | 1 | 0 | 0 | 0 |
| <i>Bolitoglossa_lignicolor</i>    | 1 | 0 | 0 | 0 |
| <i>Bolitoglossa_lincolni</i>      | 1 | 0 | 0 | 0 |
| <i>Bolitoglossa_longissima</i>    | 1 | 0 | 0 | 0 |
| <i>Bolitoglossa_macrinii</i>      | 1 | 0 | 0 | 0 |
| <i>Bolitoglossa_marmorea</i>      | 1 | 0 | 0 | 0 |

|                                       |   |   |   |   |
|---------------------------------------|---|---|---|---|
| <i>Bolitoglossa_medemi</i>            | 1 | 0 | 0 | 0 |
| <i>Bolitoglossa_mexicana</i>          | 1 | 0 | 0 | 0 |
| <i>Bolitoglossa_minutula</i>          | 1 | 0 | 0 | 0 |
| <i>Bolitoglossa_mombachoensis</i>     | 1 | 0 | 0 | 0 |
| <i>Bolitoglossa_morio</i>             | 1 | 0 | 0 | 0 |
| <i>Bolitoglossa_oaxacensis</i>        | 1 | 0 | 0 | 0 |
| <i>Bolitoglossa_occidentalis</i>      | 1 | 0 | 0 | 0 |
| <i>Bolitoglossa_odonnelli</i>         | 1 | 0 | 0 | 0 |
| <i>Bolitoglossa_palmata</i>           | 1 | 0 | 0 | 0 |
| <i>Bolitoglossa_paraensis</i>         | 1 | 0 | 0 | 0 |
| <i>Bolitoglossa_peruviana</i>         | 1 | 0 | 0 | 0 |
| <i>Bolitoglossa_pesrubra</i>          | 1 | 0 | 0 | 0 |
| <i>Bolitoglossa_platydactyla</i>      | 1 | 0 | 0 | 0 |
| <i>Bolitoglossa_porratorum</i>        | 1 | 0 | 0 | 0 |
| <i>Bolitoglossa_riletti</i>           | 1 | 0 | 0 | 0 |
| <i>Bolitoglossa_robusta</i>           | 1 | 0 | 0 | 0 |
| <i>Bolitoglossa_rostrata</i>          | 1 | 0 | 0 | 0 |
| <i>Bolitoglossa_rufescens</i>         | 1 | 0 | 0 | 0 |
| <i>Bolitoglossa_schizodactyla</i>     | 1 | 0 | 0 | 0 |
| <i>Bolitoglossa_sima</i>              | 1 | 0 | 0 | 0 |
| <i>Bolitoglossa_sooyorum</i>          | 1 | 0 | 0 | 0 |
| <i>Bolitoglossa_striatula</i>         | 1 | 0 | 0 | 0 |
| <i>Bolitoglossa_subpalmata</i>        | 1 | 0 | 0 | 0 |
| <i>Bolitoglossa_synoria</i>           | 1 | 0 | 0 | 0 |
| <i>Bolitoglossa_yucatanana</i>        | 1 | 0 | 0 | 0 |
| <i>Bolitoglossa_zapoteca</i>          | 1 | 0 | 0 | 0 |
| <i>Bradytriton_silus</i>              | 1 | 0 | 0 | 0 |
| <i>Calotriton_arnoldi</i>             | 0 | 0 | 0 | 0 |
| <i>Calotriton_asper</i>               | 0 | 0 | 0 | 0 |
| <i>Chioglossa_lusitanica</i>          | 0 | 0 | 0 | 0 |
| <i>Chiropterotriton_arboreus</i>      | 1 | 0 | 0 | 0 |
| <i>Chiropterotriton_chondrostega</i>  | 1 | 0 | 0 | 0 |
| <i>Chiropterotriton_cracens</i>       | 1 | 0 | 0 | 0 |
| <i>Chiropterotriton_dimidiatus</i>    | 1 | 0 | 0 | 0 |
| <i>Chiropterotriton_lavae</i>         | 1 | 0 | 0 | 0 |
| <i>Chiropterotriton_magnipes</i>      | 1 | 0 | 0 | 0 |
| <i>Chiropterotriton_multidentatus</i> | 1 | 0 | 0 | 0 |
| <i>Chiropterotriton_orculus</i>       | 1 | 0 | 0 | 0 |
| <i>Chiropterotriton_priscus</i>       | 1 | 0 | 0 | 0 |
| <i>Chiropterotriton_terrestris</i>    | 1 | 0 | 0 | 0 |
| <i>Cryptobranchus_alleganiensis</i>   | 0 | 0 | 0 | 0 |
| <i>Cryptotriton_alvarezdeltoroi</i>   | 1 | 0 | 0 | 0 |
| <i>Cryptotriton_nasalis</i>           | 1 | 0 | 0 | 0 |
| <i>Cryptotriton_veraepacis</i>        | 1 | 0 | 0 | 0 |

|                                     |   |   |   |   |
|-------------------------------------|---|---|---|---|
| <i>Cynops_cyanurus</i>              | 0 | 0 | 0 | 0 |
| <i>Cynops_ensicauda</i>             | 0 | 0 | 0 | 0 |
| <i>Cynops_orientalis</i>            | 0 | 0 | 0 | 0 |
| <i>Cynops_orphicus</i>              | 0 | 0 | 0 | 0 |
| <i>Cynops_pyrrhogaster</i>          | 0 | 0 | 0 | 0 |
| <i>Dendrotriton_cuchumatanus</i>    | 1 | 0 | 0 | 0 |
| <i>Dendrotriton_rabbi</i>           | 1 | 0 | 0 | 0 |
| <i>Desmognathus_aeneus</i>          | 1 | 0 | 0 | 0 |
| <i>Desmognathus_apalachicola</i>    | 1 | 0 | 0 | 0 |
| <i>Desmognathus_auriculatus</i>     | 1 | 0 | 0 | 0 |
| <i>Desmognathus_brimleyorum</i>     | 1 | 0 | 0 | 0 |
| <i>Desmognathus_carolinensis</i>    | 1 | 0 | 0 | 0 |
| <i>Desmognathus_conanti</i>         | 1 | 0 | 0 | 0 |
| <i>Desmognathus_folkertsi</i>       | 1 | 0 | 0 | 0 |
| <i>Desmognathus_fuscus</i>          | 1 | 0 | 0 | 0 |
| <i>Desmognathus_imitator</i>        | 1 | 0 | 0 | 0 |
| <i>Desmognathus_marmoratus</i>      | 1 | 0 | 0 | 0 |
| <i>Desmognathus_monticola</i>       | 1 | 0 | 0 | 0 |
| <i>Desmognathus_ochrophaeus</i>     | 1 | 0 | 0 | 0 |
| <i>Desmognathus_ocoee</i>           | 1 | 0 | 0 | 0 |
| <i>Desmognathus_orestes</i>         | 1 | 0 | 0 | 0 |
| <i>Desmognathus_planiceps</i>       | 1 | 0 | 0 | 0 |
| <i>Desmognathus_quadramaculatus</i> | 1 | 0 | 0 | 0 |
| <i>Desmognathus_santeetlah</i>      | 1 | 0 | 0 | 0 |
| <i>Desmognathus_welteri</i>         | 1 | 0 | 0 | 0 |
| <i>Desmognathus_wrighti</i>         | 1 | 0 | 0 | 0 |
| <i>Dicamptodon_aterrimus</i>        | 0 | 0 | 0 | 0 |
| <i>Dicamptodon_copei</i>            | 0 | 0 | 0 | 0 |
| <i>Dicamptodon_ensatus</i>          | 0 | 0 | 0 | 0 |
| <i>Dicamptodon_tenebrosus</i>       | 0 | 0 | 0 | 0 |
| <i>Echinotriton_andersoni</i>       | 0 | 0 | 0 | 0 |
| <i>Echinotriton_chinhaiensis</i>    | 0 | 0 | 0 | 0 |
| <i>Ensatina_eschscholtzii</i>       | 1 | 0 | 0 | 0 |
| <i>Euproctus_montanus</i>           | 0 | 0 | 0 | 0 |
| <i>Euproctus_platycephalus</i>      | 0 | 0 | 0 | 0 |
| <i>Eurycea_aquatica</i>             | 1 | 0 | 0 | 0 |
| <i>Eurycea_bilineata</i>            | 1 | 0 | 0 | 0 |
| <i>Eurycea_chisholmensis</i>        | 1 | 0 | 0 | 0 |
| <i>Eurycea_cirrigera</i>            | 1 | 0 | 0 | 0 |
| <i>Eurycea_guttolineata</i>         | 1 | 0 | 0 | 0 |
| <i>Eurycea_junaluska</i>            | 1 | 0 | 0 | 0 |
| <i>Eurycea_latitans</i>             | 1 | 0 | 0 | 0 |
| <i>Eurycea_longicauda</i>           | 1 | 0 | 0 | 0 |
| <i>Eurycea_lucifuga</i>             | 1 | 0 | 0 | 0 |

|                                   |   |   |   |   |
|-----------------------------------|---|---|---|---|
| <i>Eurycea multiplicata</i>       | 1 | 0 | 0 | 0 |
| <i>Eurycea nana</i>               | 1 | 0 | 0 | 0 |
| <i>Eurycea naufragia</i>          | 1 | 0 | 0 | 0 |
| <i>Eurycea neotenes</i>           | 1 | 0 | 0 | 0 |
| <i>Eurycea pterophila</i>         | 1 | 0 | 0 | 0 |
| <i>Eurycea quadridigitata</i>     | 1 | 0 | 0 | 0 |
| <i>Eurycea rathbuni</i>           | 1 | 0 | 0 | 0 |
| <i>Eurycea sosorum</i>            | 1 | 0 | 0 | 0 |
| <i>Eurycea sp. Comal Springs</i>  | 1 | 0 | 0 | 0 |
| <i>Eurycea spelaea</i>            | 1 | 0 | 0 | 0 |
| <i>Eurycea tonkawae</i>           | 1 | 0 | 0 | 0 |
| <i>Eurycea tridentifera</i>       | 1 | 0 | 0 | 0 |
| <i>Eurycea troglodytes</i>        | 1 | 0 | 0 | 0 |
| <i>Eurycea tynnerensis</i>        | 1 | 0 | 0 | 0 |
| <i>Eurycea waterlooensis</i>      | 1 | 0 | 0 | 0 |
| <i>Eurycea wilderae</i>           | 1 | 0 | 0 | 0 |
| <i>Gyrinophilus gulolineatus</i>  | 1 | 0 | 0 | 0 |
| <i>Gyrinophilus palleucus</i>     | 1 | 0 | 0 | 0 |
| <i>Gyrinophilus porphyriticus</i> | 1 | 0 | 0 | 0 |
| <i>Haideotriton wallacei</i>      | 1 | 0 | 0 | 0 |
| <i>Hemidactylium scutatum</i>     | 1 | 0 | 0 | 0 |
| <i>Hydromantes ambrosii</i>       | 1 | 0 | 0 | 0 |
| <i>Hydromantes brunus</i>         | 1 | 0 | 0 | 0 |
| <i>Hydromantes flavus</i>         | 1 | 0 | 0 | 0 |
| <i>Hydromantes genei</i>          | 1 | 0 | 0 | 0 |
| <i>Hydromantes imperialis</i>     | 1 | 0 | 0 | 0 |
| <i>Hydromantes italicus</i>       | 1 | 0 | 0 | 0 |
| <i>Hydromantes platycephalus</i>  | 1 | 0 | 0 | 0 |
| <i>Hydromantes shastae</i>        | 1 | 0 | 0 | 0 |
| <i>Hydromantes strinatii</i>      | 1 | 0 | 0 | 0 |
| <i>Hydromantes supramontis</i>    | 1 | 0 | 0 | 0 |
| <i>Hynobius abei</i>              | 0 | 0 | 0 | 0 |
| <i>Hynobius amjiensis</i>         | 0 | 0 | 0 | 0 |
| <i>Hynobius arisanensis</i>       | 0 | 0 | 0 | 0 |
| <i>Hynobius boulengeri</i>        | 0 | 0 | 0 | 0 |
| <i>Hynobius chinensis</i>         | 0 | 0 | 0 | 0 |
| <i>Hynobius dunni</i>             | 0 | 0 | 0 | 0 |
| <i>Hynobius formosanus</i>        | 0 | 0 | 0 | 0 |
| <i>Hynobius fuca</i>              | 0 | 0 | 0 | 0 |
| <i>Hynobius glacialis</i>         | 0 | 0 | 0 | 0 |
| <i>Hynobius guabangshanensis</i>  | 0 | 0 | 0 | 0 |
| <i>Hynobius hidamontanus</i>      | 0 | 0 | 0 | 0 |
| <i>Hynobius katoi</i>             | 0 | 0 | 0 | 0 |
| <i>Hynobius kimurae</i>           | 0 | 0 | 0 | 0 |

|                                     |   |   |   |   |
|-------------------------------------|---|---|---|---|
| <i>Hynobius_leechii</i>             | 0 | 0 | 0 | 0 |
| <i>Hynobius_lichenatus</i>          | 0 | 0 | 0 | 0 |
| <i>Hynobius_maoershanensis</i>      | 0 | 0 | 0 | 0 |
| <i>Hynobius_naevius</i>             | 0 | 0 | 0 | 0 |
| <i>Hynobius_nebulosus</i>           | 0 | 0 | 0 | 0 |
| <i>Hynobius_nigrescens</i>          | 0 | 0 | 0 | 0 |
| <i>Hynobius_okiensis</i>            | 0 | 0 | 0 | 0 |
| <i>Hynobius_quelpaertensis</i>      | 0 | 0 | 0 | 0 |
| <i>Hynobius_retardatus</i>          | 0 | 0 | 0 | 0 |
| <i>Hynobius_sonani</i>              | 0 | 0 | 0 | 0 |
| <i>Hynobius_stejnegeri</i>          | 0 | 0 | 0 | 0 |
| <i>Hynobius_takedai</i>             | 0 | 0 | 0 | 0 |
| <i>Hynobius_tokyoensis</i>          | 0 | 0 | 0 | 0 |
| <i>Hynobius_tsuensis</i>            | 0 | 0 | 0 | 0 |
| <i>Hynobius_yangi</i>               | 0 | 0 | 0 | 0 |
| <i>Hynobius_yatsui</i>              | 0 | 0 | 0 | 0 |
| <i>Hynobius_yiwuensis</i>           | 0 | 0 | 0 | 0 |
| <i>Ichthyosaura_alpestris</i>       | 0 | 0 | 0 | 0 |
| <i>Ixalotriton_niger</i>            | 1 | 0 | 0 | 0 |
| <i>Ixalotriton_parvus</i>           | 1 | 0 | 0 | 0 |
| <i>Karsenia_koreana</i>             | 1 | 0 | 0 | 0 |
| <i>Laotriton_laoensis</i>           | 0 | 0 | 0 | 0 |
| <i>Lineatriton_lineolus</i>         | 1 | 0 | 0 | 0 |
| <i>Lineatriton_orchileucos</i>      | 1 | 0 | 0 | 0 |
| <i>Lineatriton_orchimelas</i>       | 1 | 0 | 0 | 0 |
| <i>Lissotriton_boscai</i>           | 0 | 0 | 0 | 0 |
| <i>Lissotriton_helveticus</i>       | 0 | 0 | 0 | 0 |
| <i>Lissotriton_italicus</i>         | 0 | 0 | 0 | 0 |
| <i>Lissotriton_montandoni</i>       | 0 | 0 | 0 | 0 |
| <i>Lissotriton_vulgaris</i>         | 0 | 0 | 0 | 0 |
| <i>Liua_shihi</i>                   | 0 | 0 | 0 | 0 |
| <i>Liua_tsinpaensis</i>             | 0 | 0 | 0 | 0 |
| <i>Lyciasalamandra_antalyana</i>    | 0 | 0 | 0 | 0 |
| <i>Lyciasalamandra_atifi</i>        | 0 | 0 | 0 | 0 |
| <i>Lyciasalamandra_billae</i>       | 0 | 0 | 0 | 0 |
| <i>Lyciasalamandra_fazilae</i>      | 0 | 0 | 0 | 0 |
| <i>Lyciasalamandra_flavimembris</i> | 0 | 0 | 0 | 0 |
| <i>Lyciasalamandra_helverseni</i>   | 0 | 0 | 0 | 0 |
| <i>Lyciasalamandra_luschani</i>     | 0 | 0 | 0 | 0 |
| <i>Mertensiella_caucasica</i>       | 0 | 0 | 0 | 0 |
| <i>Necturus_alabamensis</i>         | 0 | 0 | 0 | 0 |
| <i>Necturus_beyeri</i>              | 0 | 0 | 0 | 0 |
| <i>Necturus_lewisi</i>              | 0 | 0 | 0 | 0 |
| <i>Necturus_maculosus</i>           | 0 | 0 | 0 | 0 |

|                                      |   |   |   |   |
|--------------------------------------|---|---|---|---|
| <i>Necturus_punctatus</i>            | 0 | 0 | 0 | 0 |
| <i>Neurergus_crocatus</i>            | 0 | 0 | 0 | 0 |
| <i>Neurergus_kaiseri</i>             | 0 | 0 | 0 | 0 |
| <i>Neurergus_microspilotus</i>       | 0 | 0 | 0 | 0 |
| <i>Neurergus_strauchii</i>           | 0 | 0 | 0 | 0 |
| <i>Notophthalmus_meridionalis</i>    | 0 | 0 | 0 | 0 |
| <i>Notophthalmus_perstriatus</i>     | 0 | 0 | 0 | 0 |
| <i>Notophthalmus_viridescens</i>     | 0 | 0 | 0 | 0 |
| <i>Nototriton_abscondens</i>         | 1 | 0 | 0 | 0 |
| <i>Nototriton_barbouri</i>           | 1 | 0 | 0 | 0 |
| <i>Nototriton_brodiei</i>            | 1 | 0 | 0 | 0 |
| <i>Nototriton_gamezi</i>             | 1 | 0 | 0 | 0 |
| <i>Nototriton_guanacaste</i>         | 1 | 0 | 0 | 0 |
| <i>Nototriton_lignicola</i>          | 1 | 0 | 0 | 0 |
| <i>Nototriton_limnospectator</i>     | 1 | 0 | 0 | 0 |
| <i>Nototriton_picadoi</i>            | 1 | 0 | 0 | 0 |
| <i>Nototriton_richardi</i>           | 1 | 0 | 0 | 0 |
| <i>Nyctanolis_pernix</i>             | 1 | 0 | 0 | 0 |
| <i>Oedipina_alleni</i>               | 1 | 0 | 0 | 0 |
| <i>Oedipina_carablanca</i>           | 1 | 0 | 0 | 0 |
| <i>Oedipina_collaris</i>             | 1 | 0 | 0 | 0 |
| <i>Oedipina_complex</i>              | 1 | 0 | 0 | 0 |
| <i>Oedipina_cyclocauda</i>           | 1 | 0 | 0 | 0 |
| <i>Oedipina_elongata</i>             | 1 | 0 | 0 | 0 |
| <i>Oedipina_gephyra</i>              | 1 | 0 | 0 | 0 |
| <i>Oedipina_gracilis</i>             | 1 | 0 | 0 | 0 |
| <i>Oedipina_grandis</i>              | 1 | 0 | 0 | 0 |
| <i>Oedipina_kasios</i>               | 1 | 0 | 0 | 0 |
| <i>Oedipina_leptopoda</i>            | 1 | 0 | 0 | 0 |
| <i>Oedipina_maritima</i>             | 1 | 0 | 0 | 0 |
| <i>Oedipina_pacificensis</i>         | 1 | 0 | 0 | 0 |
| <i>Oedipina_parvipes</i>             | 1 | 0 | 0 | 0 |
| <i>Oedipina_poelzi</i>               | 1 | 0 | 0 | 0 |
| <i>Oedipina_pseudouniformis</i>      | 1 | 0 | 0 | 0 |
| <i>Oedipina_quadra</i>               | 1 | 0 | 0 | 0 |
| <i>Oedipina_savagei</i>              | 1 | 0 | 0 | 0 |
| <i>Oedipina_stenopodia</i>           | 1 | 0 | 0 | 0 |
| <i>Oedipina_uniformis</i>            | 1 | 0 | 0 | 0 |
| <i>Ommatotriton_ophryticus</i>       | 0 | 0 | 0 | 0 |
| <i>Ommatotriton_vittatus</i>         | 0 | 0 | 0 | 0 |
| <i>Onychodactylus_fischeri</i>       | 0 | 0 | 0 | 0 |
| <i>Onychodactylus_japonicus</i>      | 0 | 0 | 0 | 0 |
| <i>Pachyhynobius_shangchengensis</i> | 0 | 0 | 0 | 0 |
| <i>Pachytriton_brevipes</i>          | 0 | 0 | 0 | 0 |

|                                      |   |   |   |   |
|--------------------------------------|---|---|---|---|
| <i>Pachytriton labiatus</i>          | 0 | 0 | 0 | 0 |
| <i>Paradactylodon gorganensis</i>    | 0 | 0 | 0 | 0 |
| <i>Paradactylodon mustersi</i>       | 0 | 0 | 0 | 0 |
| <i>Paradactylodon persicus</i>       | 0 | 0 | 0 | 0 |
| <i>Paramesotriton caudopunctatus</i> | 0 | 0 | 0 | 0 |
| <i>Paramesotriton chinensis</i>      | 0 | 0 | 0 | 0 |
| <i>Paramesotriton deloustali</i>     | 0 | 0 | 0 | 0 |
| <i>Paramesotriton fuzhongensis</i>   | 0 | 0 | 0 | 0 |
| <i>Paramesotriton guanxiensis</i>    | 0 | 0 | 0 | 0 |
| <i>Paramesotriton hongkongensis</i>  | 0 | 0 | 0 | 0 |
| <i>Paramesotriton zhijinensis</i>    | 0 | 0 | 0 | 0 |
| <i>Parvimolge townsendi</i>          | 1 | 0 | 0 | 0 |
| <i>Phaeognathus hubrichti</i>        | 1 | 0 | 0 | 0 |
| <i>Plethodon albagula</i>            | 1 | 0 | 0 | 0 |
| <i>Plethodon amplus</i>              | 1 | 0 | 0 | 0 |
| <i>Plethodon angusticlavius</i>      | 1 | 0 | 0 | 0 |
| <i>Plethodon asupak</i>              | 1 | 0 | 0 | 0 |
| <i>Plethodon aureolus</i>            | 1 | 0 | 0 | 0 |
| <i>Plethodon caddoensis</i>          | 1 | 0 | 0 | 0 |
| <i>Plethodon chattahoochee</i>       | 1 | 0 | 0 | 0 |
| <i>Plethodon cheoah</i>              | 1 | 0 | 0 | 0 |
| <i>Plethodon chlorobryonis</i>       | 1 | 0 | 0 | 0 |
| <i>Plethodon cinereus</i>            | 1 | 0 | 0 | 0 |
| <i>Plethodon cylindraceus</i>        | 1 | 0 | 0 | 0 |
| <i>Plethodon dorsalis</i>            | 1 | 0 | 0 | 0 |
| <i>Plethodon dunni</i>               | 1 | 0 | 0 | 0 |
| <i>Plethodon electromorphus</i>      | 1 | 0 | 0 | 0 |
| <i>Plethodon elongatus</i>           | 1 | 0 | 0 | 0 |
| <i>Plethodon fourchensis</i>         | 1 | 0 | 0 | 0 |
| <i>Plethodon glutinosus</i>          | 1 | 0 | 0 | 0 |
| <i>Plethodon grobmani</i>            | 1 | 0 | 0 | 0 |
| <i>Plethodon hoffmani</i>            | 1 | 0 | 0 | 0 |
| <i>Plethodon hubrichti</i>           | 1 | 0 | 0 | 0 |
| <i>Plethodon idahoensis</i>          | 1 | 0 | 0 | 0 |
| <i>Plethodon jordani</i>             | 1 | 0 | 0 | 0 |
| <i>Plethodon kentucki</i>            | 1 | 0 | 0 | 0 |
| <i>Plethodon kiamichi</i>            | 1 | 0 | 0 | 0 |
| <i>Plethodon kisatchie</i>           | 1 | 0 | 0 | 0 |
| <i>Plethodon larselli</i>            | 1 | 0 | 0 | 0 |
| <i>Plethodon longicrus</i>           | 1 | 0 | 0 | 0 |
| <i>Plethodon meridianus</i>          | 1 | 0 | 0 | 0 |
| <i>Plethodon metcalfi</i>            | 1 | 0 | 0 | 0 |
| <i>Plethodon mississippi</i>         | 1 | 0 | 0 | 0 |
| <i>Plethodon montanus</i>            | 1 | 0 | 0 | 0 |

|                                  |   |   |   |   |
|----------------------------------|---|---|---|---|
| <i>Plethodon_neomexicanus</i>    | 1 | 0 | 0 | 0 |
| <i>Plethodon_nettingi</i>        | 1 | 0 | 0 | 0 |
| <i>Plethodon_ocmulgee</i>        | 1 | 0 | 0 | 0 |
| <i>Plethodon_oconaluftee</i>     | 1 | 0 | 0 | 0 |
| <i>Plethodon_ouachitae</i>       | 1 | 0 | 0 | 0 |
| <i>Plethodon_petraeus</i>        | 1 | 0 | 0 | 0 |
| <i>Plethodon_punctatus</i>       | 1 | 0 | 0 | 0 |
| <i>Plethodon_richmondi</i>       | 1 | 0 | 0 | 0 |
| <i>Plethodon_savannah</i>        | 1 | 0 | 0 | 0 |
| <i>Plethodon_sequoyah</i>        | 1 | 0 | 0 | 0 |
| <i>Plethodon_serratus</i>        | 1 | 0 | 0 | 0 |
| <i>Plethodon_shenandoah</i>      | 1 | 0 | 0 | 0 |
| <i>Plethodon_shermani</i>        | 1 | 0 | 0 | 0 |
| <i>Plethodon_stormi</i>          | 1 | 0 | 0 | 0 |
| <i>Plethodon_teahalee</i>        | 1 | 0 | 0 | 0 |
| <i>Plethodon_vandykei</i>        | 1 | 0 | 0 | 0 |
| <i>Plethodon_variolatus</i>      | 1 | 0 | 0 | 0 |
| <i>Plethodon_vehiculum</i>       | 1 | 0 | 0 | 0 |
| <i>Plethodon_ventralis</i>       | 1 | 0 | 0 | 0 |
| <i>Plethodon_virginia</i>        | 1 | 0 | 0 | 0 |
| <i>Plethodon_websteri</i>        | 1 | 0 | 0 | 0 |
| <i>Plethodon_wehrlei</i>         | 1 | 0 | 0 | 0 |
| <i>Plethodon_welleri</i>         | 1 | 0 | 0 | 0 |
| <i>Plethodon_yonahlossee</i>     | 1 | 0 | 0 | 0 |
| <i>Pleurodeles_nebulosus</i>     | 0 | 0 | 0 | 0 |
| <i>Pleurodeles_poireti</i>       | 0 | 0 | 0 | 0 |
| <i>Pleurodeles_waltl</i>         | 0 | 0 | 0 | 0 |
| <i>Proteus_anguinus</i>          | 0 | 0 | 0 | 0 |
| <i>Pseudobranchius_axanthus</i>  | 0 | 0 | 0 | 1 |
| <i>Pseudobranchius_striatus</i>  | 0 | 0 | 0 | 1 |
| <i>Pseudoeurycea_altamontana</i> | 1 | 0 | 0 | 0 |
| <i>Pseudoeurycea_anitae</i>      | 1 | 0 | 0 | 0 |
| <i>Pseudoeurycea_bellii</i>      | 1 | 0 | 0 | 0 |
| <i>Pseudoeurycea_boneti</i>      | 1 | 0 | 0 | 0 |
| <i>Pseudoeurycea_brunnata</i>    | 1 | 0 | 0 | 0 |
| <i>Pseudoeurycea_cephalica</i>   | 1 | 0 | 0 | 0 |
| <i>Pseudoeurycea_cochranae</i>   | 1 | 0 | 0 | 0 |
| <i>Pseudoeurycea_conanti</i>     | 1 | 0 | 0 | 0 |
| <i>Pseudoeurycea_exspectata</i>  | 1 | 0 | 0 | 0 |
| <i>Pseudoeurycea_firscheini</i>  | 1 | 0 | 0 | 0 |
| <i>Pseudoeurycea_gadovii</i>     | 1 | 0 | 0 | 0 |
| <i>Pseudoeurycea_galeanae</i>    | 1 | 0 | 0 | 0 |
| <i>Pseudoeurycea_gigantea</i>    | 1 | 0 | 0 | 0 |
| <i>Pseudoeurycea_goebeli</i>     | 1 | 0 | 0 | 0 |



|                                      |   |   |   |   |
|--------------------------------------|---|---|---|---|
| <i>Pseudoeurycea_juarezi</i>         | 1 | 0 | 0 | 0 |
| <i>Pseudoeurycea_leprosa</i>         | 1 | 0 | 0 | 0 |
| <i>Pseudoeurycea_longicauda</i>      | 1 | 0 | 0 | 0 |
| <i>Pseudoeurycea_lyncbi</i>          | 1 | 0 | 0 | 0 |
| <i>Pseudoeurycea_maxima</i>          | 1 | 0 | 0 | 0 |
| <i>Pseudoeurycea_melanomolga</i>     | 1 | 0 | 0 | 0 |
| <i>Pseudoeurycea_mystax</i>          | 1 | 0 | 0 | 0 |
| <i>Pseudoeurycea_naucampatepetl</i>  | 1 | 0 | 0 | 0 |
| <i>Pseudoeurycea_nigromaculata</i>   | 1 | 0 | 0 | 0 |
| <i>Pseudoeurycea_obesa</i>           | 1 | 0 | 0 | 0 |
| <i>Pseudoeurycea_papenfussi</i>      | 1 | 0 | 0 | 0 |
| <i>Pseudoeurycea_rex</i>             | 1 | 0 | 0 | 0 |
| <i>Pseudoeurycea_robertsi</i>        | 1 | 0 | 0 | 0 |
| <i>Pseudoeurycea_ruficauda</i>       | 1 | 0 | 0 | 0 |
| <i>Pseudoeurycea_saltator</i>        | 1 | 0 | 0 | 0 |
| <i>Pseudoeurycea_scandens</i>        | 1 | 0 | 0 | 0 |
| <i>Pseudoeurycea_smithi</i>          | 1 | 0 | 0 | 0 |
| <i>Pseudoeurycea_tenchalli</i>       | 1 | 0 | 0 | 0 |
| <i>Pseudoeurycea_unguidentis</i>     | 1 | 0 | 0 | 0 |
| <i>Pseudoeurycea_werleri</i>         | 1 | 0 | 0 | 0 |
| <i>Pseudohynobius_flavomaculatus</i> | 0 | 0 | 0 | 0 |
| <i>Pseudohynobius_puxiongensis</i>   | 0 | 0 | 0 | 0 |
| <i>Pseudohynobius_shuichengensis</i> | 0 | 0 | 0 | 0 |
| <i>Pseudotriton_montanus</i>         | 1 | 0 | 0 | 0 |
| <i>Pseudotriton_ruber</i>            | 1 | 0 | 0 | 0 |
| <i>Ranodon_sibiricus</i>             | 0 | 0 | 0 | 0 |
| <i>Rhyacotriton_cascadeae</i>        | 0 | 0 | 0 | 0 |
| <i>Rhyacotriton_kezeri</i>           | 0 | 0 | 0 | 0 |
| <i>Rhyacotriton_olympicus</i>        | 0 | 0 | 0 | 0 |
| <i>Rhyacotriton_variegatus</i>       | 0 | 0 | 0 | 0 |
| <i>Salamandra_algira</i>             | 0 | 0 | 0 | 0 |
| <i>Salamandra_atra</i>               | 0 | 0 | 0 | 0 |
| <i>Salamandra_corsica</i>            | 0 | 0 | 0 | 0 |
| <i>Salamandra_infraimmaculata</i>    | 0 | 0 | 0 | 0 |
| <i>Salamandra_lanzai</i>             | 0 | 0 | 0 | 0 |
| <i>Salamandra_salamandra</i>         | 0 | 0 | 0 | 0 |
| <i>Salamandrella_keyserlingii</i>    | 0 | 0 | 0 | 0 |
| <i>Salamandrella_tridactyla</i>      | 0 | 0 | 0 | 0 |
| <i>Salamandrina_perspicillata</i>    | 0 | 0 | 0 | 0 |
| <i>Salamandrina_terdigitata</i>      | 0 | 0 | 0 | 0 |
| <i>Siren_intermedia</i>              | 0 | 0 | 0 | 1 |
| <i>Siren_lacertina</i>               | 0 | 0 | 0 | 1 |
| <i>Stereochilus_marginatus</i>       | 1 | 0 | 0 | 0 |
| <i>Taricha_granulosa</i>             | 0 | 0 | 0 | 0 |

|                                     |   |   |   |   |
|-------------------------------------|---|---|---|---|
| <i>Taricha rivularis</i>            | 0 | 0 | 0 | 0 |
| <i>Taricha torosa</i>               | 0 | 0 | 0 | 0 |
| <i>Thorius dubitus</i>              | 1 | 0 | 0 | 0 |
| <i>Thorius minutissimus</i>         | 1 | 0 | 0 | 0 |
| <i>Thorius troglodytes</i>          | 1 | 0 | 0 | 0 |
| <i>Triturus carnifex</i>            | 0 | 0 | 0 | 0 |
| <i>Triturus cristatus</i>           | 0 | 0 | 0 | 0 |
| <i>Triturus dobrogicus</i>          | 0 | 0 | 0 | 0 |
| <i>Triturus karelinii</i>           | 0 | 0 | 0 | 0 |
| <i>Triturus macedonicus</i>         | 0 | 0 | 0 | 0 |
| <i>Triturus marmoratus</i>          | 0 | 0 | 0 | 0 |
| <i>Triturus pygmaeus</i>            | 0 | 0 | 0 | 0 |
| <i>Tylotriton asperrimus</i>        | 0 | 0 | 0 | 0 |
| <i>Tylotriton kweichowensis</i>     | 0 | 0 | 0 | 0 |
| <i>Tylotriton shanjing</i>          | 0 | 0 | 0 | 0 |
| <i>Tylotriton taliangensis</i>      | 0 | 0 | 0 | 0 |
| <i>Tylotriton verrucosus</i>        | 0 | 0 | 0 | 0 |
| <i>Tylotriton wenxianensis</i>      | 0 | 0 | 0 | 0 |
| <i>Urspelerpes brucei</i>           | 1 | 0 | 0 | 0 |
| <i>Anura</i>                        |   |   |   |   |
| <i>Acanthixalus sonjae</i>          | 1 | 0 | 0 | 0 |
| <i>Acanthixalus spinosus</i>        | 1 | 0 | 0 | 0 |
| <i>Acris crepitans</i>              | 0 | 0 | 0 | 0 |
| <i>Acris gryllus</i>                | 0 | 0 | 0 | 0 |
| <i>Adelophryne gutturosa</i>        | 1 | 0 | 1 | 0 |
| <i>Adelotus brevis</i>              | 1 | 0 | 0 | 0 |
| <i>Adelphobates castaneoticus</i>   | - | 0 | 0 | 0 |
| <i>Adelphobates galactonotus</i>    | - | 0 | 0 | 0 |
| <i>Adelphobates quinquevittatus</i> | - | 0 | 0 | 0 |
| <i>Adenomera andreae</i>            | 1 | 0 | 0 | 0 |
| <i>Adenomera heyeri</i>             | - | 0 | 0 | 0 |
| <i>Adenomera hylaedactyla</i>       | 1 | 0 | 0 | 0 |
| <i>Adenomus kelaartii</i>           | - | 0 | 0 | 0 |
| <i>Afrixalus delicatus</i>          | - | 0 | 0 | 0 |
| <i>Afrixalus dorsalis</i>           | 1 | 0 | 0 | 0 |
| <i>Afrixalus fornasini</i>          | 1 | 0 | 0 | 0 |
| <i>Afrixalus knysnae</i>            | - | 0 | 0 | 0 |
| <i>Afrixalus laevis</i>             | - | 0 | 0 | 0 |
| <i>Afrixalus paradorsalis</i>       | - | 0 | 0 | 0 |
| <i>Afrixalus pygmaeus</i>           | - | 0 | 0 | 0 |
| <i>Agalychnis annae</i>             | 1 | 0 | 0 | 0 |
| <i>Agalychnis callidryas</i>        | 1 | 0 | 0 | 0 |
| <i>Agalychnis moreletii</i>         | 1 | 0 | 0 | 0 |
| <i>Agalychnis saltator</i>          | 1 | 0 | 0 | 0 |

|                                         |   |   |   |   |
|-----------------------------------------|---|---|---|---|
| <i>Agalychnis_spurrelli</i>             | 1 | 0 | 0 | 0 |
| <i>Aglyptodactylus_laticeps</i>         | 0 | 0 | 0 | 0 |
| <i>Aglyptodactylus_madagascariensis</i> | 0 | 0 | 0 | 0 |
| <i>Albericus_laurini</i>                | - | 0 | 0 | 0 |
| <i>Alexteroon_obstetricans</i>          | 1 | 0 | 0 | 0 |
| <i>Allobates_brunneus</i>               | - | 0 | 0 | 0 |
| <i>Allobates_caeruleodactylus</i>       | - | 0 | 0 | 0 |
| <i>Allobates_conspicuus</i>             | - | 0 | 0 | 0 |
| <i>Allobates_femoralis</i>              | 1 | 0 | 0 | 0 |
| <i>Allobates_gasconi</i>                | - | 0 | 0 | 0 |
| <i>Allobates_juanii</i>                 | - | 0 | 0 | 0 |
| <i>Allobates_nidicola</i>               | - | 0 | 0 | 0 |
| <i>Allobates_talamancae</i>             | 1 | 0 | 0 | 0 |
| <i>Allobates_trilineatus</i>            | - | 0 | 0 | 0 |
| <i>Allobates_undulatus</i>              | - | 0 | 0 | 0 |
| <i>Allobates_zaparo</i>                 | - | 0 | 0 | 0 |
| <i>Allophryne_ruthveni</i>              | - | 0 | 0 | 0 |
| <i>Alsodes_australis</i>                | - | 0 | 0 | 0 |
| <i>Alsodes_barrioi</i>                  | - | 0 | 0 | 0 |
| <i>Alsodes_gargola</i>                  | 0 | 0 | 0 | 0 |
| <i>Alsodes_kaweshkari</i>               | - | 0 | 0 | 0 |
| <i>Alsodes_monticola</i>                | - | 0 | 0 | 0 |
| <i>Alsodes_nodosus</i>                  | - | 0 | 0 | 0 |
| <i>Alsodes_tumultuosus</i>              | - | 0 | 0 | 0 |
| <i>Alsodes_vanzolinii</i>               | - | 0 | 0 | 0 |
| <i>Alytes_cisternasii</i>               | 1 | 0 | 0 | 0 |
| <i>Alytes_dickhilleni</i>               | 1 | 0 | 0 | 0 |
| <i>Alytes_maurus</i>                    | 1 | 0 | 0 | 0 |
| <i>Alytes_muletensis</i>                | 1 | 0 | 0 | 0 |
| <i>Alytes_obstetricans</i>              | 1 | 0 | 0 | 0 |
| <i>Amazophrynella_bokermanni</i>        | - | 0 | 0 | 0 |
| <i>Amazophrynella_minuta</i>            | - | 0 | 0 | 0 |
| <i>Ameerega_altamazonica</i>            | - | 0 | 0 | 0 |
| <i>Ameerega_bassleri</i>                | - | 0 | 0 | 0 |
| <i>Ameerega_bilinguis</i>               | 1 | 0 | 0 | 0 |
| <i>Ameerega_braccata</i>                | - | 0 | 0 | 0 |
| <i>Ameerega_cainarachi</i>              | - | 0 | 0 | 0 |
| <i>Ameerega_flavopicta</i>              | - | 0 | 0 | 0 |
| <i>Ameerega_hahneli</i>                 | 1 | 0 | 0 | 0 |
| <i>Ameerega_macero</i>                  | - | 0 | 0 | 0 |
| <i>Ameerega_parvula</i>                 | 1 | 0 | 0 | 0 |
| <i>Ameerega_petersi</i>                 | - | 0 | 0 | 0 |
| <i>Ameerega_picta</i>                   | 1 | 0 | 0 | 0 |
| <i>Ameerega_pongoensis</i>              | - | 0 | 0 | 0 |

|                                    |   |   |   |   |
|------------------------------------|---|---|---|---|
| <i>Ameerega_pulchripecta</i>       | - | 0 | 0 | 0 |
| <i>Ameerega_rubriventris</i>       | - | 0 | 0 | 0 |
| <i>Ameerega_silverstonei</i>       | 1 | 0 | 0 | 0 |
| <i>Ameerega_simulans</i>           | - | 0 | 0 | 0 |
| <i>Ameerega_smaragdina</i>         | - | 0 | 0 | 0 |
| <i>Ameerega_trivittata</i>         | 1 | 0 | 0 | 0 |
| <i>Amietia_angolensis</i>          | 0 | 0 | 0 | 0 |
| <i>Amietia_dracomontana</i>        | - | 0 | 0 | 0 |
| <i>Amietia_fuscigula</i>           | - | 0 | 0 | 0 |
| <i>Amietia_vertebralis</i>         | 0 | 0 | 0 | 0 |
| <i>Amietophrynus_brauni</i>        | - | 0 | 0 | 0 |
| <i>Amietophrynus_camerunensis</i>  | - | 0 | 0 | 0 |
| <i>Amietophrynus_garmani</i>       | - | 0 | 0 | 0 |
| <i>Amietophrynus_gracilipes</i>    | - | 0 | 0 | 0 |
| <i>Amietophrynus_gutturalis</i>    | - | 0 | 0 | 0 |
| <i>Amietophrynus_kisoloensis</i>   | - | 0 | 0 | 0 |
| <i>Amietophrynus_latifrons</i>     | - | 0 | 0 | 0 |
| <i>Amietophrynus_lemairii</i>      | - | 0 | 0 | 0 |
| <i>Amietophrynus_maculatus</i>     | - | 0 | 0 | 0 |
| <i>Amietophrynus_mauritanicus</i>  | - | 0 | 0 | 0 |
| <i>Amietophrynus_pantherinus</i>   | - | 0 | 0 | 0 |
| <i>Amietophrynus_pardalis</i>      | - | 0 | 0 | 0 |
| <i>Amietophrynus_poweri</i>        | - | 0 | 0 | 0 |
| <i>Amietophrynus_rangeri</i>       | - | 0 | 0 | 0 |
| <i>Amietophrynus_regularis</i>     | - | 0 | 0 | 0 |
| <i>Amietophrynus_steindachneri</i> | - | 0 | 0 | 0 |
| <i>Amietophrynus_tuberosus</i>     | - | 0 | 0 | 0 |
| <i>Amietophrynus_xeros</i>         | - | 0 | 0 | 0 |
| <i>Amolops_archotaphus</i>         | - | 0 | 0 | 0 |
| <i>Amolops_bellulus</i>            | - | 0 | 0 | 0 |
| <i>Amolops_chunganensis</i>        | - | 0 | 0 | 0 |
| <i>Amolops_compotrix</i>           | - | 0 | 0 | 0 |
| <i>Amolops_cremnobatus</i>         | 1 | 0 | 0 | 0 |
| <i>Amolops_cucae</i>               | - | 0 | 0 | 0 |
| <i>Amolops_daiyunensis</i>         | - | 0 | 0 | 0 |
| <i>Amolops_daorum</i>              | - | 0 | 0 | 0 |
| <i>Amolops_granulosus</i>          | - | 0 | 0 | 0 |
| <i>Amolops_hainanensis</i>         | 1 | 0 | 0 | 0 |
| <i>Amolops_hongkongensis</i>       | - | 0 | 0 | 0 |
| <i>Amolops_iriodes</i>             | - | 0 | 0 | 0 |
| <i>Amolops_jinjiangensis</i>       | - | 0 | 0 | 0 |
| <i>Amolops_kangtingensis</i>       | - | 0 | 0 | 0 |
| <i>Amolops_larutensis</i>          | - | 0 | 0 | 0 |
| <i>Amolops_liangshanensis</i>      | - | 0 | 0 | 0 |

|                                     |   |   |   |   |
|-------------------------------------|---|---|---|---|
| <i>Amolops_lifanensis</i>           | - | 0 | 0 | 0 |
| <i>Amolops_loloensis</i>            | - | 0 | 0 | 0 |
| <i>Amolops_mantzorum</i>            | - | 0 | 0 | 0 |
| <i>Amolops_marmoratus</i>           | 0 | 0 | 0 | 0 |
| <i>Amolops_panhai</i>               | 0 | 0 | 0 | 0 |
| <i>Amolops_ricketti</i>             | 0 | 0 | 0 | 0 |
| <i>Amolops_spinapectoralis</i>      | - | 0 | 0 | 0 |
| <i>Amolops_torrentis</i>            | - | 0 | 0 | 0 |
| <i>Amolops_viridimaculatus</i>      | - | 0 | 0 | 0 |
| <i>Amolops_vitreus</i>              | - | 0 | 0 | 0 |
| <i>Amolops_wuyiensis</i>            | - | 0 | 0 | 0 |
| <i>Anaxyrus_americanus</i>          | - | 0 | 0 | 0 |
| <i>Anaxyrus_baxteri</i>             | - | 0 | 0 | 0 |
| <i>Anaxyrus_boreas</i>              | - | 0 | 0 | 0 |
| <i>Anaxyrus_californicus</i>        | - | 0 | 0 | 0 |
| <i>Anaxyrus_canorus</i>             | - | 0 | 0 | 0 |
| <i>Anaxyrus_cognatus</i>            | - | 0 | 0 | 0 |
| <i>Anaxyrus_debilis</i>             | - | 0 | 0 | 0 |
| <i>Anaxyrus_exsul</i>               | - | 0 | 0 | 0 |
| <i>Anaxyrus_fowleri</i>             | - | 0 | 0 | 0 |
| <i>Anaxyrus_hemiophrys</i>          | - | 0 | 0 | 0 |
| <i>Anaxyrus_houstonensis</i>        | - | 0 | 0 | 0 |
| <i>Anaxyrus_microscaphus</i>        | - | 0 | 0 | 0 |
| <i>Anaxyrus_nelsoni</i>             | - | 0 | 0 | 0 |
| <i>Anaxyrus_punctatus</i>           | - | 0 | 0 | 0 |
| <i>Anaxyrus_quercicus</i>           | - | 0 | 0 | 0 |
| <i>Anaxyrus_retiformis</i>          | - | 0 | 0 | 0 |
| <i>Anaxyrus_sp._velatus</i>         | - | 0 | 0 | 0 |
| <i>Anaxyrus_speciosus</i>           | - | 0 | 0 | 0 |
| <i>Anaxyrus_terrestris</i>          | - | 0 | 0 | 0 |
| <i>Anaxyrus_woodhousii</i>          | - | 0 | 0 | 0 |
| <i>Andinobates_bombetes</i>         | - | 0 | 0 | 0 |
| <i>Andinobates_claudiae</i>         | - | 0 | 0 | 0 |
| <i>Andinobates_fulguritus</i>       | - | 0 | 0 | 0 |
| <i>Andinobates_minutus</i>          | - | 0 | 0 | 0 |
| <i>Andinobates_virolinensis</i>     | - | 0 | 0 | 0 |
| <i>Anhydrophryne_rattrayi</i>       | 1 | 0 | 0 | 0 |
| <i>Anodonthyla_boulengerii</i>      | - | 0 | 0 | 0 |
| <i>Anodonthyla_hutchisoni</i>       | - | 0 | 0 | 0 |
| <i>Anodonthyla_montana</i>          | 0 | 0 | 0 | 0 |
| <i>Anodonthyla_moramora</i>         | - | 0 | 0 | 0 |
| <i>Anodonthyla_nigrigularis</i>     | - | 0 | 0 | 0 |
| <i>Anodonthyla_rouxae</i>           | 0 | 0 | 0 | 0 |
| <i>Anomaloglossus_baeobatrachus</i> | - | 0 | 0 | 0 |

|                                           |   |   |   |   |
|-------------------------------------------|---|---|---|---|
| <i>Anomaloglossus_beebei</i>              | - | 0 | 0 | 0 |
| <i>Anomaloglossus_degranvillei</i>        | - | 0 | 0 | 0 |
| <i>Anomaloglossus_praderioi</i>           | - | 0 | 0 | 0 |
| <i>Anomaloglossus_roraima</i>             | - | 0 | 0 | 0 |
| <i>Anomaloglossus_stepheni</i>            | 1 | 0 | 0 | 0 |
| <i>Anomaloglossus_tepuyensis</i>          | - | 0 | 0 | 0 |
| <i>Anotheca_spinosa</i>                   | 0 | 0 | 0 | 0 |
| <i>Ansonia_endauensis</i>                 | - | 0 | 0 | 0 |
| <i>Ansonia_fulginea</i>                   | - | 0 | 0 | 0 |
| <i>Ansonia_guibeii</i>                    | - | 0 | 0 | 0 |
| <i>Ansonia_hanitschi</i>                  | 0 | 0 | 0 | 0 |
| <i>Ansonia_leptopus</i>                   | 0 | 0 | 0 | 0 |
| <i>Ansonia_longidigita</i>                | 0 | 0 | 0 | 0 |
| <i>Ansonia_malayana</i>                   | - | 0 | 0 | 0 |
| <i>Ansonia_mcgregori</i>                  | - | 0 | 0 | 0 |
| <i>Ansonia_minuta</i>                     | - | 0 | 0 | 0 |
| <i>Ansonia_muelleri</i>                   | - | 0 | 0 | 0 |
| <i>Ansonia_ornata</i>                     | - | 0 | 0 | 0 |
| <i>Ansonia_platysoma</i>                  | - | 0 | 0 | 0 |
| <i>Ansonia_siamensis</i>                  | - | 0 | 0 | 0 |
| <i>Ansonia_sp._1_Sanguila_et_al._2011</i> | - | 0 | 0 | 0 |
| <i>Ansonia_sp._2_Sanguila_et_al._2011</i> | - | 0 | 0 | 0 |
| <i>Ansonia_sp._BORN_08424</i>             | - | 0 | 0 | 0 |
| <i>Ansonia_sp._KUHE_12488</i>             | - | 0 | 0 | 0 |
| <i>Ansonia_sp._LSUHC_4991</i>             | - | 0 | 0 | 0 |
| <i>Ansonia_sp._LSUHC_8049</i>             | - | 0 | 0 | 0 |
| <i>Ansonia_spinulifer</i>                 | 0 | 0 | 0 | 0 |
| <i>Ansonia_torrentis</i>                  | - | 0 | 0 | 0 |
| <i>Aparasphenodon_brunoi</i>              | - | 0 | 0 | 0 |
| <i>Aphantophryne_pansa</i>                | 1 | 0 | 0 | 0 |
| <i>Aplastodiscus_albofrenatus</i>         | - | 0 | 0 | 0 |
| <i>Aplastodiscus_albosignatus</i>         | 0 | 0 | 0 | 0 |
| <i>Aplastodiscus_arildae</i>              | 0 | 0 | 0 | 0 |
| <i>Aplastodiscus_callipygius</i>          | 0 | 0 | 0 | 0 |
| <i>Aplastodiscus_cavicola</i>             | - | 0 | 0 | 0 |
| <i>Aplastodiscus_cochranae</i>            | - | 0 | 0 | 0 |
| <i>Aplastodiscus_eugenioi</i>             | - | 0 | 0 | 0 |
| <i>Aplastodiscus_leucopygius</i>          | 0 | 0 | 0 | 0 |
| <i>Aplastodiscus_perviridis</i>           | 0 | 0 | 0 | 0 |
| <i>Aplastodiscus_weygoldti</i>            | - | 0 | 0 | 0 |
| <i>Argenteohyla_siemersi</i>              | - | 0 | 0 | 0 |
| <i>Aromobates_nocturnus</i>               | - | 0 | 0 | 0 |
| <i>Aromobates_saltuensis</i>              | - | 0 | 0 | 0 |
| <i>Arthroleptella_bicolor</i>             | 1 | 0 | 0 | 0 |

|                                     |   |   |   |   |
|-------------------------------------|---|---|---|---|
| <i>Arthroleptella drewesii</i>      | - | 0 | 0 | 0 |
| <i>Arthroleptella landdrosia</i>    | - | 0 | 0 | 0 |
| <i>Arthroleptella lightfooti</i>    | - | 0 | 0 | 0 |
| <i>Arthroleptella subvoce</i>       | - | 0 | 0 | 0 |
| <i>Arthroleptella villiersi</i>     | 1 | 0 | 0 | 0 |
| <i>Arthroleptis adelphus</i>        | - | 0 | 0 | 0 |
| <i>Arthroleptis affinis</i>         | - | 0 | 0 | 0 |
| <i>Arthroleptis aureoli</i>         | - | 0 | 0 | 0 |
| <i>Arthroleptis francei</i>         | - | 0 | 0 | 0 |
| <i>Arthroleptis krokosua</i>        | - | 0 | 0 | 0 |
| <i>Arthroleptis nikeae</i>          | - | 0 | 0 | 0 |
| <i>Arthroleptis poecilonotus</i>    | - | 0 | 0 | 0 |
| <i>Arthroleptis reichei</i>         | - | 0 | 0 | 0 |
| <i>Arthroleptis schubotzi</i>       | - | 0 | 0 | 0 |
| <i>Arthroleptis stenodactylus</i>   | - | 0 | 0 | 0 |
| <i>Arthroleptis sylvaticus</i>      | - | 0 | 0 | 0 |
| <i>Arthroleptis taeniatus</i>       | - | 0 | 0 | 0 |
| <i>Arthroleptis tanneri</i>         | 1 | 0 | 0 | 0 |
| <i>Arthroleptis variabilis</i>      | 1 | 0 | 0 | 0 |
| <i>Arthroleptis wahlbergii</i>      | 1 | 0 | 0 | 0 |
| <i>Arthroleptis xenodactyloides</i> | 1 | 0 | 0 | 0 |
| <i>Arthroleptis xenodactylus</i>    | - | 0 | 0 | 0 |
| <i>Ascaphus montanus</i>            | 0 | 0 | 0 | 0 |
| <i>Ascaphus truei</i>               | 0 | 0 | 0 | 0 |
| <i>Assa darlingtoni</i>             | 1 | 0 | 0 | 0 |
| <i>Asterophrys turpicola</i>        | - | 0 | 0 | 0 |
| <i>Astylosternus batesi</i>         | - | 0 | 0 | 0 |
| <i>Astylosternus diadematus</i>     | - | 0 | 0 | 0 |
| <i>Astylosternus schioetzi</i>      | 0 | 0 | 0 | 0 |
| <i>Atelognathus jeinimenensis</i>   | - | 0 | 0 | 0 |
| <i>Atelognathus patagonicus</i>     | 0 | 0 | 0 | 0 |
| <i>Atelopus barbotini</i>           | - | 0 | 0 | 0 |
| <i>Atelopus bomolochos</i>          | - | 0 | 0 | 0 |
| <i>Atelopus chiriquiensis</i>       | - | 0 | 0 | 0 |
| <i>Atelopus flavescens</i>          | - | 0 | 0 | 0 |
| <i>Atelopus franciscus</i>          | - | 0 | 0 | 0 |
| <i>Atelopus halihelos</i>           | - | 0 | 0 | 0 |
| <i>Atelopus ignescens</i>           | - | 0 | 0 | 0 |
| <i>Atelopus longirostris</i>        | - | 0 | 0 | 0 |
| <i>Atelopus peruensis</i>           | - | 0 | 0 | 0 |
| <i>Atelopus pulcher</i>             | - | 0 | 0 | 0 |
| <i>Atelopus seminiferus</i>         | - | 0 | 0 | 0 |
| <i>Atelopus senex</i>               | - | 0 | 0 | 0 |
| <i>Atelopus spumarius</i>           | 0 | 0 | 0 | 0 |

|                                   |   |   |   |   |
|-----------------------------------|---|---|---|---|
| <i>Atelopus_spurrelli</i>         | - | 0 | 0 | 0 |
| <i>Atelopus_varius</i>            | - | 0 | 0 | 0 |
| <i>Atelopus_zeteki</i>            | - | 0 | 0 | 0 |
| <i>Aubria_subsigillata</i>        | - | 0 | 0 | 0 |
| <i>Austrochaperina_derongo</i>    | - | 0 | 0 | 0 |
| <i>Babina_adenopleura</i>         | - | 0 | 0 | 0 |
| <i>Babina_chapaensis</i>          | - | 0 | 0 | 0 |
| <i>Babina_holsti</i>              | - | 0 | 0 | 0 |
| <i>Babina_okinavana</i>           | - | 0 | 0 | 0 |
| <i>Babina_pleuraden</i>           | - | 0 | 0 | 0 |
| <i>Barbourula_busuangensis</i>    | - | 0 | 0 | 0 |
| <i>Barbourula_kalimantanensis</i> | - | 0 | 0 | 0 |
| <i>Barycholos_pulcher</i>         | 1 | 0 | 1 | 0 |
| <i>Barycholos_ternetzi</i>        | 1 | 0 | 1 | 0 |
| <i>Barygenys_exsul</i>            | - | 0 | 0 | 0 |
| <i>Barygenys_flavigularis</i>     | 1 | 0 | 0 | 0 |
| <i>Batrachyla_antartandica</i>    | 1 | 0 | 0 | 0 |
| <i>Batrachyla_letopus</i>         | 1 | 0 | 0 | 0 |
| <i>Batrachyla_taeiniata</i>       | 1 | 0 | 0 | 0 |
| <i>Batrachylodes_vertrebralis</i> | 1 | 0 | 0 | 0 |
| <i>Blommersia_blommersae</i>      | - | 0 | 0 | 0 |
| <i>Blommersia_domerguei</i>       | - | 0 | 0 | 0 |
| <i>Blommersia_grandisonae</i>     | - | 0 | 0 | 0 |
| <i>Blommersia_kely</i>            | 1 | 0 | 0 | 0 |
| <i>Blommersia_sarotra</i>         | - | 0 | 0 | 0 |
| <i>Blommersia_wittei</i>          | 1 | 0 | 0 | 0 |
| <i>Boehmantis_microtympnum</i>    | 0 | 0 | 0 | 0 |
| <i>Bokermannohyla_astartea</i>    | - | 0 | 0 | 0 |
| <i>Bokermannohyla_circumdata</i>  | 0 | 0 | 0 | 0 |
| <i>Bokermannohyla_hylax</i>       | - | 0 | 0 | 0 |
| <i>Bokermannohyla_martinsi</i>    | - | 0 | 0 | 0 |
| <i>Bombina_bombina</i>            | 0 | 0 | 0 | 0 |
| <i>Bombina_fortinuptialis</i>     | - | 0 | 0 | 0 |
| <i>Bombina_lichuanensis</i>       | - | 0 | 0 | 0 |
| <i>Bombina_maxima</i>             | - | 0 | 0 | 0 |
| <i>Bombina_microdeladigitora</i>  | - | 0 | 0 | 0 |
| <i>Bombina_orientalis</i>         | 0 | 0 | 0 | 0 |
| <i>Bombina_pachypus</i>           | - | 0 | 0 | 0 |
| <i>Bombina_variegata</i>          | 0 | 0 | 0 | 0 |
| <i>Boophis_albilabris</i>         | - | 0 | 0 | 0 |
| <i>Boophis_boehmei</i>            | - | 0 | 0 | 0 |
| <i>Boophis_doulioti</i>           | - | 0 | 0 | 0 |
| <i>Boophis_goudotii</i>           | - | 0 | 0 | 0 |
| <i>Boophis_idae</i>               | - | 0 | 0 | 0 |



|                                       |   |   |   |   |
|---------------------------------------|---|---|---|---|
| <i>Boophis_luteus</i>                 | 0 | 0 | 0 | 0 |
| <i>Boophis_madagascariensis</i>       | 0 | 0 | 0 | 0 |
| <i>Boophis_marojezensis</i>           | - | 0 | 0 | 0 |
| <i>Boophis_microtyimpanum</i>         | - | 0 | 0 | 0 |
| <i>Boophis_occidentalis</i>           | 0 | 0 | 0 | 0 |
| <i>Boophis_pauliani</i>               | - | 0 | 0 | 0 |
| <i>Boophis_rappiodes</i>              | - | 0 | 0 | 0 |
| <i>Boophis_sibilans</i>               | - | 0 | 0 | 0 |
| <i>Boophis_sp._Comoros</i>            | - | 0 | 0 | 0 |
| <i>Boophis_tephraeomystax</i>         | 0 | 0 | 0 | 0 |
| <i>Boophis_viridis</i>                | - | 0 | 0 | 0 |
| <i>Boophis_vittatus</i>               | - | 0 | 0 | 0 |
| <i>Boophis_xerophilus</i>             | 0 | 0 | 0 | 0 |
| <i>Brachycephalus_ephippium</i>       | 1 | 0 | 1 | 0 |
| <i>Brachytarsophrys_feae</i>          | 0 | 0 | 0 | 0 |
| <i>Brachytarsophrys_platyparietus</i> | - | 0 | 0 | 0 |
| <i>Breviceps_fichus</i>               | - | 0 | 0 | 0 |
| <i>Breviceps_fuscus</i>               | 1 | 0 | 0 | 0 |
| <i>Breviceps_mossambicus</i>          | 1 | 0 | 0 | 0 |
| <i>Bromeliahyla_bromeliacia</i>       | - | 0 | 0 | 0 |
| <i>Bryophryne_cophites</i>            | 1 | 0 | 0 | 0 |
| <i>Buergeria_buergeri</i>             | 0 | 0 | 0 | 0 |
| <i>Buergeria_japonica</i>             | 0 | 0 | 0 | 0 |
| <i>Buergeria_oxycephala</i>           | - | 0 | 0 | 0 |
| <i>Buergeria_robusta</i>              | 0 | 0 | 0 | 0 |
| <i>Bufo_bankorensis</i>               | - | 0 | 0 | 0 |
| <i>Bufo_bufo</i>                      | 0 | 0 | 0 | 0 |
| <i>Bufo_cryptotympanicus</i>          | - | 0 | 0 | 0 |
| <i>Bufo_eichwaldi</i>                 | - | 0 | 0 | 0 |
| <i>Bufo_gargarizans</i>               | 0 | 0 | 0 | 0 |
| <i>Bufo_japonicus</i>                 | 0 | 0 | 0 | 0 |
| <i>Bufo_stejnegeri</i>                | - | 0 | 0 | 0 |
| <i>Bufo_tibetanus</i>                 | - | 0 | 0 | 0 |
| <i>Bufo_torrenticola</i>              | - | 0 | 0 | 0 |
| <i>Bufo_tuberculatus</i>              | - | 0 | 0 | 0 |
| <i>Bufo_verrucosissimus</i>           | - | 0 | 0 | 0 |
| <i>Cacosternum_boettgeri</i>          | 0 | 0 | 0 | 0 |
| <i>Cacosternum_capense</i>            | 0 | 0 | 0 | 0 |
| <i>Cacosternum_nanum</i>              | - | 0 | 0 | 0 |
| <i>Cacosternum_platys</i>             | 0 | 0 | 0 | 0 |
| <i>Calluella_guttulata</i>            | 0 | 0 | 0 | 0 |
| <i>Callulina_kisiwamsitu</i>          | 1 | 0 | 0 | 0 |
| <i>Callulina_kreffti</i>              | 1 | 0 | 0 | 0 |
| <i>Callulops_robustus</i>             | 1 | 0 | 0 | 0 |

|                                   |   |   |   |   |
|-----------------------------------|---|---|---|---|
| <i>Calyptocephallela gayi</i>     | 0 | 0 | 0 | 0 |
| <i>Capensibufo rosei</i>          | 0 | 0 | 0 | 0 |
| <i>Capensibufo tradouwi</i>       | 0 | 0 | 0 | 0 |
| <i>Cardioglossa elegans</i>       | - | 0 | 0 | 0 |
| <i>Cardioglossa gracilis</i>      | - | 0 | 0 | 0 |
| <i>Cardioglossa gratiosa</i>      | 0 | 0 | 0 | 0 |
| <i>Cardioglossa leucomystax</i>   | 1 | 0 | 0 | 0 |
| <i>Cardioglossa manengouba</i>    | - | 0 | 0 | 0 |
| <i>Cardioglossa occidentalis</i>  | - | 0 | 0 | 0 |
| <i>Cardioglossa oreas</i>         | - | 0 | 0 | 0 |
| <i>Cardioglossa pulchra</i>       | - | 0 | 0 | 0 |
| <i>Cardioglossa schioetzi</i>     | - | 0 | 0 | 0 |
| <i>Caudiverbera caudiverbera</i>  | - | 0 | 0 | 0 |
| <i>Celsiella revocata</i>         | - | 0 | 0 | 0 |
| <i>Celsiella vozmedianoi</i>      | - | 0 | 0 | 0 |
| <i>Centrolene altitudinale</i>    | - | 0 | 0 | 0 |
| <i>Centrolene antioquiense</i>    | - | 0 | 0 | 0 |
| <i>Centrolene bacatum</i>         | - | 0 | 0 | 0 |
| <i>Centrolene buckleyi</i>        | - | 0 | 0 | 0 |
| <i>Centrolene geckoideum</i>      | 1 | 0 | 0 | 0 |
| <i>Centrolene grandisonae</i>     | - | 0 | 0 | 0 |
| <i>Centrolene hesperium</i>       | - | 0 | 0 | 0 |
| <i>Centrolene hybrida</i>         | - | 0 | 0 | 0 |
| <i>Centrolene notostictum</i>     | - | 0 | 0 | 0 |
| <i>Centrolene peristictum</i>     | - | 0 | 0 | 0 |
| <i>Centrolene pipilatum</i>       | - | 0 | 0 | 0 |
| <i>Centrolene savagei</i>         | - | 0 | 0 | 0 |
| <i>Centrolene venezuelense</i>    | - | 0 | 0 | 0 |
| <i>Ceratobatrachus guentheri</i>  | 1 | 0 | 0 | 0 |
| <i>Ceratophrys cornuta</i>        | 0 | 0 | 0 | 0 |
| <i>Ceratophrys cranwelli</i>      | - | 0 | 0 | 0 |
| <i>Ceratophrys ornata</i>         | 0 | 0 | 0 | 0 |
| <i>Ceuthomantis smaragdinus</i>   | - | 0 | 0 | 0 |
| <i>Chacophrys pierottii</i>       | - | 0 | 0 | 0 |
| <i>Chaperina fusca</i>            | 0 | 0 | 0 | 0 |
| <i>Charadrahyla nephila</i>       | - | 0 | 0 | 0 |
| <i>Charadrahyla taeniopus</i>     | 0 | 0 | 0 | 0 |
| <i>Chiasmocleis hudsoni</i>       | - | 0 | 0 | 0 |
| <i>Chiasmocleis shudikarensis</i> | - | 0 | 0 | 0 |
| <i>Chimerella mariaelenae</i>     | - | 0 | 0 | 0 |
| <i>Chiromantis doriae</i>         | 1 | 0 | 0 | 0 |
| <i>Chiromantis rufescens</i>      | 1 | 0 | 0 | 0 |
| <i>Chiromantis vittatus</i>       | 1 | 0 | 0 | 0 |
| <i>Chiromantis xerampelina</i>    | 1 | 0 | 0 | 0 |

|                                  |   |   |   |   |
|----------------------------------|---|---|---|---|
| <i>Choerophryne_rostellifer</i>  | 1 | 0 | 0 | 0 |
| <i>Churamiti_maridadi</i>        | - | 0 | 0 | 0 |
| <i>Clinotarsus_alticola</i>      | - | 0 | 0 | 0 |
| <i>Clinotarsus_curtipes</i>      | - | 0 | 0 | 0 |
| <i>Cochranella_daidalea</i>      | - | 0 | 0 | 0 |
| <i>Cochranella_euknemos</i>      | 1 | 0 | 0 | 0 |
| <i>Cochranella_granulosa</i>     | 1 | 0 | 0 | 0 |
| <i>Cochranella_litoralis</i>     | - | 0 | 0 | 0 |
| <i>Cochranella_mache</i>         | - | 0 | 0 | 0 |
| <i>Cochranella_nola</i>          | - | 0 | 0 | 0 |
| <i>Colostethus_argyrogaster</i>  | - | 0 | 0 | 0 |
| <i>Colostethus_fraterdanieli</i> | - | 0 | 0 | 0 |
| <i>Colostethus_fugax</i>         | - | 0 | 0 | 0 |
| <i>Colostethus_imbricolus</i>    | - | 0 | 0 | 0 |
| <i>Colostethus_inguinalis</i>    | - | 0 | 0 | 0 |
| <i>Colostethus_latinasus</i>     | - | 0 | 0 | 0 |
| <i>Colostethus_panamansis</i>    | - | 0 | 0 | 0 |
| <i>Colostethus_pratti</i>        | - | 0 | 0 | 0 |
| <i>Conraua_crassipes</i>         | 0 | 0 | 0 | 0 |
| <i>Conraua_goliath</i>           | 0 | 0 | 0 | 0 |
| <i>Conraua_robusta</i>           | - | 0 | 0 | 0 |
| <i>Cophixalus_balbus</i>         | - | 0 | 0 | 0 |
| <i>Cophixalus_humicola</i>       | - | 0 | 0 | 0 |
| <i>Cophixalus_sphagnicola</i>    | 1 | 0 | 0 | 0 |
| <i>Cophixalus_tridactylus</i>    | - | 0 | 0 | 0 |
| <i>Cophyla_berara</i>            | - | 0 | 0 | 0 |
| <i>Cophyla_phyllodactyla</i>     | 0 | 0 | 0 | 0 |
| <i>Copiula_major</i>             | - | 0 | 0 | 0 |
| <i>Copiula_obsti</i>             | - | 0 | 0 | 0 |
| <i>Copiula_pipiens</i>           | - | 0 | 0 | 0 |
| <i>Corythomantis_greeningi</i>   | 0 | 0 | 0 | 0 |
| <i>Craugastor_alfredi</i>        | - | 0 | 1 | 0 |
| <i>Craugastor_andi</i>           | - | 0 | 1 | 0 |
| <i>Craugastor_angelicus</i>      | - | 0 | 1 | 0 |
| <i>Craugastor_augusti</i>        | 1 | 0 | 1 | 0 |
| <i>Craugastor_bocourti</i>       | - | 0 | 1 | 0 |
| <i>Craugastor_bransfordii</i>    | - | 0 | 1 | 0 |
| <i>Craugastor_crassidigitus</i>  | - | 0 | 1 | 0 |
| <i>Craugastor_cuaquero</i>       | - | 0 | 1 | 0 |
| <i>Craugastor_daryi</i>          | 1 | 0 | 1 | 0 |
| <i>Craugastor_emcelae</i>        | - | 0 | 1 | 0 |
| <i>Craugastor_fitzingeri</i>     | - | 0 | 1 | 0 |
| <i>Craugastor_fleischmanni</i>   | - | 0 | 1 | 0 |
| <i>Craugastor_laticeps</i>       | - | 0 | 1 | 0 |

|                                   |   |   |   |   |
|-----------------------------------|---|---|---|---|
| <i>Craugastor_lineatus</i>        | - | 0 | 1 | 0 |
| <i>Craugastor_loki</i>            | - | 0 | 1 | 0 |
| <i>Craugastor_longirostris</i>    | 1 | 0 | 1 | 0 |
| <i>Craugastor_megacephalus</i>    | - | 0 | 1 | 0 |
| <i>Craugastor_melanostictus</i>   | - | 0 | 1 | 0 |
| <i>Craugastor_mexicanus</i>       | - | 0 | 1 | 0 |
| <i>Craugastor_obesus</i>          | - | 0 | 1 | 0 |
| <i>Craugastor_podiciferus</i>     | 1 | 0 | 1 | 0 |
| <i>Craugastor_punctariolus</i>    | - | 0 | 1 | 0 |
| <i>Craugastor_pygmaeus</i>        | 1 | 0 | 1 | 0 |
| <i>Craugastor_raniformis</i>      | - | 0 | 1 | 0 |
| <i>Craugastor_ranoides</i>        | - | 0 | 1 | 0 |
| <i>Craugastor_rhodopis</i>        | - | 0 | 1 | 0 |
| <i>Craugastor_rugulosus</i>       | - | 0 | 1 | 0 |
| <i>Craugastor_rupinius</i>        | - | 0 | 1 | 0 |
| <i>Craugastor_sandersoni</i>      | - | 0 | 1 | 0 |
| <i>Craugastor_sartori</i>         | - | 0 | 1 | 0 |
| <i>Craugastor_spatulatus</i>      | - | 0 | 1 | 0 |
| <i>Craugastor_stuarti</i>         | - | 0 | 1 | 0 |
| <i>Craugastor_tabasarae</i>       | - | 0 | 1 | 0 |
| <i>Craugastor_talamancae</i>      | - | 0 | 1 | 0 |
| <i>Craugastor_tarahumaraensis</i> | - | 0 | 1 | 0 |
| <i>Craugastor_uno</i>             | - | 0 | 1 | 0 |
| <i>Crinia_deserticola</i>         | - | 0 | 0 | 0 |
| <i>Crinia_nimbus</i>              | - | 0 | 0 | 0 |
| <i>Crinia_parinsignifera</i>      | - | 0 | 0 | 0 |
| <i>Crinia_riparia</i>             | - | 0 | 0 | 0 |
| <i>Crinia_signifera</i>           | 0 | 0 | 0 | 0 |
| <i>Crinia_tinnula</i>             | 0 | 0 | 0 | 0 |
| <i>Crossodactylus_caramaschii</i> | - | 0 | 0 | 0 |
| <i>Crossodactylus_schmidti</i>    | 0 | 0 | 0 | 0 |
| <i>Cruziohyla_calcarifer</i>      | 1 | 0 | 0 | 0 |
| <i>Cryptothylax_greshoffii</i>    | 1 | 0 | 0 | 0 |
| <i>Ctenophryne_geayi</i>          | 0 | 0 | 0 | 0 |
| <i>Cycloramphus_acangatan</i>     | 1 | 0 | 0 | 0 |
| <i>Cycloramphus_boraceiensis</i>  | 1 | 0 | 0 | 0 |
| <i>Cyclorana_alboguttata</i>      | 0 | 0 | 0 | 0 |
| <i>Cyclorana_australis</i>        | 0 | 0 | 0 | 0 |
| <i>Cyclorana_brevipes</i>         | 0 | 0 | 0 | 0 |
| <i>Cyclorana_cryptotis</i>        | - | 0 | 0 | 0 |
| <i>Cyclorana_cultripes</i>        | - | 0 | 0 | 0 |
| <i>Cyclorana_longipes</i>         | 0 | 0 | 0 | 0 |
| <i>Cyclorana_maculosa</i>         | - | 0 | 0 | 0 |
| <i>Cyclorana_maini</i>            | - | 0 | 0 | 0 |

|                                         |   |   |   |   |
|-----------------------------------------|---|---|---|---|
| <i>Cyclorana_manya</i>                  | - | 0 | 0 | 0 |
| <i>Cyclorana_novaehollandiae</i>        | 0 | 0 | 0 | 0 |
| <i>Cyclorana_platycephala</i>           | - | 0 | 0 | 0 |
| <i>Cyclorana_vagitus</i>                | - | 0 | 0 | 0 |
| <i>Cyclorana_verrucosa</i>              | - | 0 | 0 | 0 |
| <i>Dasylops_schirchi</i>                | 0 | 0 | 0 | 0 |
| <i>Dendrobates_auratus</i>              | 1 | 0 | 0 | 0 |
| <i>Dendrobates_leucomelas</i>           | 1 | 0 | 0 | 0 |
| <i>Dendrobates_tinctorius</i>           | - | 0 | 0 | 0 |
| <i>Dendrobates_truncatus</i>            | - | 0 | 0 | 0 |
| <i>Dendrophryniscus_brevipollicatus</i> | - | 0 | 0 | 0 |
| <i>Dendrophryniscus_carvalhoi</i>       | - | 0 | 0 | 0 |
| <i>Dendrophryniscus_krausae</i>         | - | 0 | 0 | 0 |
| <i>Dendrophryniscus_leucomystax</i>     | - | 0 | 0 | 0 |
| <i>Dendrophryniscus_oreites</i>         | - | 0 | 0 | 0 |
| <i>Dendrophryniscus_sp._296MC</i>       | - | 0 | 0 | 0 |
| <i>Dendrophryniscus_sp._3035T</i>       | - | 0 | 0 | 0 |
| <i>Dendropsophus_allenorum</i>          | - | 0 | 0 | 0 |
| <i>Dendropsophus_anceps</i>             | 0 | 0 | 0 | 0 |
| <i>Dendropsophus_aperomeus</i>          | - | 0 | 0 | 0 |
| <i>Dendropsophus_berthalutzae</i>       | 1 | 0 | 0 | 0 |
| <i>Dendropsophus_bifurcus</i>           | - | 0 | 0 | 0 |
| <i>Dendropsophus_bipunctatus</i>        | - | 0 | 0 | 0 |
| <i>Dendropsophus_branneri</i>           | - | 0 | 0 | 0 |
| <i>Dendropsophus_brevifrons</i>         | 1 | 0 | 0 | 0 |
| <i>Dendropsophus_carnifex</i>           | 0 | 0 | 0 | 0 |
| <i>Dendropsophus_ebraccatus</i>         | 1 | 0 | 0 | 0 |
| <i>Dendropsophus_elegans</i>            | - | 0 | 0 | 0 |
| <i>Dendropsophus_giesleri</i>           | 1 | 0 | 0 | 0 |
| <i>Dendropsophus_koechlini</i>          | 0 | 0 | 0 | 0 |
| <i>Dendropsophus_labialis</i>           | - | 0 | 0 | 0 |
| <i>Dendropsophus_leali</i>              | 0 | 0 | 0 | 0 |
| <i>Dendropsophus_leucophyllatus</i>     | 1 | 0 | 0 | 0 |
| <i>Dendropsophus_marmoratus</i>         | 0 | 0 | 0 | 0 |
| <i>Dendropsophus_microcephalus</i>      | - | 0 | 0 | 0 |
| <i>Dendropsophus_minusculus</i>         | - | 0 | 0 | 0 |
| <i>Dendropsophus_minutus</i>            | - | 0 | 0 | 0 |
| <i>Dendropsophus_miyatai</i>            | - | 0 | 0 | 0 |
| <i>Dendropsophus_nanus</i>              | - | 0 | 0 | 0 |
| <i>Dendropsophus_parviceps</i>          | 0 | 0 | 0 | 0 |
| <i>Dendropsophus_pelidna</i>            | - | 0 | 0 | 0 |
| <i>Dendropsophus_rhodopeplus</i>        | 0 | 0 | 0 | 0 |
| <i>Dendropsophus_riveroi</i>            | - | 0 | 0 | 0 |
| <i>Dendropsophus_robertmertensi</i>     | - | 0 | 0 | 0 |

|                                    |   |   |   |   |
|------------------------------------|---|---|---|---|
| <i>Dendropsophus_rubicundulus</i>  | - | 0 | 0 | 0 |
| <i>Dendropsophus_sanborni</i>      | - | 0 | 0 | 0 |
| <i>Dendropsophus_sarayacuensis</i> | 0 | 0 | 0 | 0 |
| <i>Dendropsophus_sartori</i>       | - | 0 | 0 | 0 |
| <i>Dendropsophus_schubarti</i>     | - | 0 | 0 | 0 |
| <i>Dendropsophus_seniculus</i>     | - | 0 | 0 | 0 |
| <i>Dendropsophus_triangulum</i>    | 0 | 0 | 0 | 0 |
| <i>Dendropsophus_walfordi</i>      | - | 0 | 0 | 0 |
| <i>Dermatonotus_muelleri</i>       | 0 | 0 | 0 | 0 |
| <i>Diasporus_hylaeiformis</i>      | - | 0 | 0 | 0 |
| <i>Diasporus_vocator</i>           | - | 0 | 0 | 0 |
| <i>Didynamipus_sjostedti</i>       | 1 | 0 | 0 | 0 |
| <i>Discodeles_guppyi</i>           | 1 | 0 | 1 | 0 |
| <i>Discoglossus_galganoi</i>       | 0 | 0 | 0 | 0 |
| <i>Discoglossus_jeanneae</i>       | - | 0 | 0 | 0 |
| <i>Discoglossus_montalentii</i>    | - | 0 | 0 | 0 |
| <i>Discoglossus_pictus</i>         | 0 | 0 | 0 | 0 |
| <i>Discoglossus_sardus</i>         | - | 0 | 0 | 0 |
| <i>Discoglossus_scovazzi</i>       | - | 0 | 0 | 0 |
| <i>Duellmanohyla_rufiocularis</i>  | 1 | 0 | 0 | 0 |
| <i>Duellmanohyla_soralia</i>       | 1 | 0 | 0 | 0 |
| <i>Duttaphrynus_atukoralei</i>     | - | 0 | 0 | 0 |
| <i>Duttaphrynus_brevirostris</i>   | - | 0 | 0 | 0 |
| <i>Duttaphrynus_crocus</i>         | - | 0 | 0 | 0 |
| <i>Duttaphrynus_dhufarensis</i>    | - | 0 | 0 | 0 |
| <i>Duttaphrynus_himalayanus</i>    | - | 0 | 0 | 0 |
| <i>Duttaphrynus_hololius</i>       | - | 0 | 0 | 0 |
| <i>Duttaphrynus_melanostictus</i>  | - | 0 | 0 | 0 |
| <i>Duttaphrynus_parietalis</i>     | - | 0 | 0 | 0 |
| <i>Duttaphrynus_scaber</i>         | - | 0 | 0 | 0 |
| <i>Duttaphrynus_sp._FB-2009b</i>   | - | 0 | 0 | 0 |
| <i>Duttaphrynus_stomaticus</i>     | - | 0 | 0 | 0 |
| <i>Duttaphrynus_stuarti</i>        | - | 0 | 0 | 0 |
| <i>Dyscophus_antongilii</i>        | - | 0 | 0 | 0 |
| <i>Dyscophus_guineti</i>           | 0 | 0 | 0 | 0 |
| <i>Dyscophus_insularis</i>         | - | 0 | 0 | 0 |
| <i>Ecnomiohyla_miliaria</i>        | 1 | 0 | 0 | 0 |
| <i>Ecnomiohyla_minera</i>          | - | 0 | 0 | 0 |
| <i>Ecnomiohyla_miotympanum</i>     | - | 0 | 0 | 0 |
| <i>Edalorhina_perezi</i>           | 1 | 0 | 0 | 0 |
| <i>Elachistocleis_ovalis</i>       | 0 | 0 | 0 | 0 |
| <i>Eleutherodactylus_abbotti</i>   | 1 | 0 | 1 | 0 |
| <i>Eleutherodactylus_acmonis</i>   | - | 0 | 1 | 0 |
| <i>Eleutherodactylus_albipes</i>   | 1 | 0 | 1 | 0 |

|                                                    |   |   |   |   |
|----------------------------------------------------|---|---|---|---|
| <i>Eleutherodactylus_alcoae</i>                    | 1 | 0 | 1 | 0 |
| <i>Eleutherodactylus_alticola</i>                  | 1 | 0 | 1 | 0 |
| <i>Eleutherodactylus_amadeus</i>                   | - | 0 | 1 | 0 |
| <i>Eleutherodactylus_amplinympa</i>                | - | 0 | 1 | 0 |
| <i>Eleutherodactylus_andrewsi</i>                  | - | 0 | 1 | 0 |
| <i>Eleutherodactylus_antillensis</i>               | - | 0 | 1 | 0 |
| <i>Eleutherodactylus_apostates</i>                 | - | 0 | 1 | 0 |
| <i>Eleutherodactylus_armstrongi</i>                | - | 0 | 1 | 0 |
| <i>Eleutherodactylus_atkinsi</i>                   | 1 | 0 | 1 | 0 |
| <i>Eleutherodactylus_audanti</i>                   | - | 0 | 1 | 0 |
| <i>Eleutherodactylus_auriculatoides</i>            | - | 0 | 1 | 0 |
| <i>Eleutherodactylus_auriculatus</i>               | 1 | 0 | 1 | 0 |
| <i>Eleutherodactylus_bakeri</i>                    | - | 0 | 1 | 0 |
| <i>Eleutherodactylus_barlagnei</i>                 | - | 0 | 1 | 0 |
| <i>Eleutherodactylus_bartonsmithi</i>              | - | 0 | 1 | 0 |
| <i>Eleutherodactylus_blairhedgesi</i>              | - | 0 | 1 | 0 |
| <i>Eleutherodactylus_bothroboans</i>               | - | 0 | 1 | 0 |
| <i>Eleutherodactylus_bresslerae</i>                | - | 0 | 1 | 0 |
| <i>Eleutherodactylus_brevirostris</i>              | - | 0 | 1 | 0 |
| <i>Eleutherodactylus_brittoni</i>                  | - | 0 | 1 | 0 |
| <i>Eleutherodactylus_caribe</i>                    | 1 | 0 | 1 | 0 |
| <i>Eleutherodactylus_casparii</i>                  | - | 0 | 1 | 0 |
| <i>Eleutherodactylus_cavernicola</i>               | - | 0 | 1 | 0 |
| <i>Eleutherodactylus_cf._auriculatus_1_AR-2009</i> | - | 0 | 1 | 0 |
| <i>Eleutherodactylus_cf._auriculatus_2_AR-2009</i> | - | 0 | 1 | 0 |
| <i>Eleutherodactylus_cf._auriculatus_3_AR-2009</i> | - | 0 | 1 | 0 |
| <i>Eleutherodactylus_chlorophenax</i>              | - | 0 | 1 | 0 |
| <i>Eleutherodactylus_cochranae</i>                 | - | 0 | 1 | 0 |
| <i>Eleutherodactylus_cooki</i>                     | 1 | 0 | 1 | 0 |
| <i>Eleutherodactylus_coqui</i>                     | 1 | 0 | 1 | 0 |
| <i>Eleutherodactylus_corona</i>                    | - | 0 | 1 | 0 |
| <i>Eleutherodactylus_counouspeus</i>               | - | 0 | 1 | 0 |
| <i>Eleutherodactylus_cubanus</i>                   | - | 0 | 1 | 0 |
| <i>Eleutherodactylus_cundalli</i>                  | 1 | 0 | 1 | 0 |
| <i>Eleutherodactylus_cuneatus</i>                  | - | 0 | 1 | 0 |
| <i>Eleutherodactylus_darlingtoni</i>               | - | 0 | 1 | 0 |
| <i>Eleutherodactylus_dimidiatus</i>                | 1 | 0 | 1 | 0 |
| <i>Eleutherodactylus_dolomedes</i>                 | - | 0 | 1 | 0 |
| <i>Eleutherodactylus_eileenae</i>                  | - | 0 | 1 | 0 |
| <i>Eleutherodactylus_emiliae</i>                   | - | 0 | 1 | 0 |
| <i>Eleutherodactylus_eneidae</i>                   | - | 0 | 1 | 0 |
| <i>Eleutherodactylus_etheridgei</i>                | - | 0 | 1 | 0 |
| <i>Eleutherodactylus_eunaster</i>                  | - | 0 | 1 | 0 |
| <i>Eleutherodactylus_flavescens</i>                | - | 0 | 1 | 0 |

|                                           |   |   |   |   |
|-------------------------------------------|---|---|---|---|
| <i>Eleutherodactylus_fowleri</i>          | 1 | 0 | 1 | 0 |
| <i>Eleutherodactylus_furcyensis</i>       | - | 0 | 1 | 0 |
| <i>Eleutherodactylus_fuscus</i>           | - | 0 | 1 | 0 |
| <i>Eleutherodactylus_glamyrus</i>         | - | 0 | 1 | 0 |
| <i>Eleutherodactylus_glandulifer</i>      | - | 0 | 1 | 0 |
| <i>Eleutherodactylus_glanduliferoides</i> | - | 0 | 1 | 0 |
| <i>Eleutherodactylus_glaphycompus</i>     | - | 0 | 1 | 0 |
| <i>Eleutherodactylus_glaucoreius</i>      | - | 0 | 1 | 0 |
| <i>Eleutherodactylus_goini</i>            | - | 0 | 1 | 0 |
| <i>Eleutherodactylus_gosseii</i>          | 1 | 0 | 1 | 0 |
| <i>Eleutherodactylus_grabhami</i>         | - | 0 | 1 | 0 |
| <i>Eleutherodactylus_grahami</i>          | - | 0 | 1 | 0 |
| <i>Eleutherodactylus_greyi</i>            | - | 0 | 1 | 0 |
| <i>Eleutherodactylus_griphus</i>          | - | 0 | 1 | 0 |
| <i>Eleutherodactylus_gryllus</i>          | - | 0 | 1 | 0 |
| <i>Eleutherodactylus_guanahacabibes</i>   | - | 0 | 1 | 0 |
| <i>Eleutherodactylus_guantanamera</i>     | - | 0 | 1 | 0 |
| <i>Eleutherodactylus_gundlachi</i>        | - | 0 | 1 | 0 |
| <i>Eleutherodactylus_haitianus</i>        | - | 0 | 1 | 0 |
| <i>Eleutherodactylus_hedricki</i>         | - | 0 | 1 | 0 |
| <i>Eleutherodactylus_heminota</i>         | - | 0 | 1 | 0 |
| <i>Eleutherodactylus_hypostenor</i>       | - | 0 | 1 | 0 |
| <i>Eleutherodactylus_iberia</i>           | - | 0 | 1 | 0 |
| <i>Eleutherodactylus_inoptatus</i>        | 1 | 0 | 1 | 0 |
| <i>Eleutherodactylus_intermedius</i>      | - | 0 | 1 | 0 |
| <i>Eleutherodactylus_ionthus</i>          | - | 0 | 1 | 0 |
| <i>Eleutherodactylus_jamaicensis</i>      | - | 0 | 1 | 0 |
| <i>Eleutherodactylus_jaumei</i>           | - | 0 | 1 | 0 |
| <i>Eleutherodactylus_johnstonei</i>       | 1 | 0 | 1 | 0 |
| <i>Eleutherodactylus_jugans</i>           | - | 0 | 1 | 0 |
| <i>Eleutherodactylus_junori</i>           | - | 0 | 1 | 0 |
| <i>Eleutherodactylus_klinikowskii</i>     | - | 0 | 1 | 0 |
| <i>Eleutherodactylus_lamprotes</i>        | - | 0 | 1 | 0 |
| <i>Eleutherodactylus_leberi</i>           | 1 | 0 | 1 | 0 |
| <i>Eleutherodactylus_lentus</i>           | 1 | 0 | 1 | 0 |
| <i>Eleutherodactylus_leoncei</i>          | 1 | 0 | 1 | 0 |
| <i>Eleutherodactylus_limbatus</i>         | - | 0 | 1 | 0 |
| <i>Eleutherodactylus_locustus</i>         | - | 0 | 1 | 0 |
| <i>Eleutherodactylus_luteolus</i>         | - | 0 | 1 | 0 |
| <i>Eleutherodactylus_maestrensis</i>      | - | 0 | 1 | 0 |
| <i>Eleutherodactylus_mariposa</i>         | - | 0 | 1 | 0 |
| <i>Eleutherodactylus_marnockii</i>        | 1 | 0 | 1 | 0 |
| <i>Eleutherodactylus_martinicensis</i>    | 1 | 0 | 1 | 0 |
| <i>Eleutherodactylus_melacara</i>         | - | 0 | 1 | 0 |



|                                        |   |   |   |   |
|----------------------------------------|---|---|---|---|
| <i>Eleutherodactylus_minutus</i>       | - | 0 | 1 | 0 |
| <i>Eleutherodactylus_monensis</i>      | - | 0 | 1 | 0 |
| <i>Eleutherodactylus_nitidus</i>       | - | 0 | 1 | 0 |
| <i>Eleutherodactylus_nortoni</i>       | - | 0 | 1 | 0 |
| <i>Eleutherodactylus_nubicola</i>      | 1 | 0 | 1 | 0 |
| <i>Eleutherodactylus_orcutti</i>       | - | 0 | 1 | 0 |
| <i>Eleutherodactylus_orientalis</i>    | - | 0 | 1 | 0 |
| <i>Eleutherodactylus_oxyrhincus</i>    | - | 0 | 1 | 0 |
| <i>Eleutherodactylus_pantoni</i>       | - | 0 | 1 | 0 |
| <i>Eleutherodactylus_parabates</i>     | - | 0 | 1 | 0 |
| <i>Eleutherodactylus_parapelates</i>   | - | 0 | 1 | 0 |
| <i>Eleutherodactylus_patriciae</i>     | - | 0 | 1 | 0 |
| <i>Eleutherodactylus_paulsoni</i>      | - | 0 | 1 | 0 |
| <i>Eleutherodactylus_pentasyringos</i> | - | 0 | 1 | 0 |
| <i>Eleutherodactylus_pezopetrus</i>    | - | 0 | 1 | 0 |
| <i>Eleutherodactylus_pictissimus</i>   | - | 0 | 1 | 0 |
| <i>Eleutherodactylus_pinarensis</i>    | - | 0 | 1 | 0 |
| <i>Eleutherodactylus_pinchoni</i>      | - | 0 | 1 | 0 |
| <i>Eleutherodactylus_pipilans</i>      | - | 0 | 1 | 0 |
| <i>Eleutherodactylus_pituius</i>       | - | 0 | 1 | 0 |
| <i>Eleutherodactylus_planirostris</i>  | 1 | 0 | 1 | 0 |
| <i>Eleutherodactylus_poolei</i>        | - | 0 | 1 | 0 |
| <i>Eleutherodactylus_portoricensis</i> | - | 0 | 1 | 0 |
| <i>Eleutherodactylus_principalis</i>   | - | 0 | 1 | 0 |
| <i>Eleutherodactylus_probolaeus</i>    | - | 0 | 1 | 0 |
| <i>Eleutherodactylus_rhodesi</i>       | - | 0 | 1 | 0 |
| <i>Eleutherodactylus_richmondi</i>     | - | 0 | 1 | 0 |
| <i>Eleutherodactylus_ricordii</i>      | - | 0 | 1 | 0 |
| <i>Eleutherodactylus_riparius</i>      | - | 0 | 1 | 0 |
| <i>Eleutherodactylus_rivularis</i>     | - | 0 | 1 | 0 |
| <i>Eleutherodactylus_rogersi</i>       | - | 0 | 1 | 0 |
| <i>Eleutherodactylus_ronaldi</i>       | - | 0 | 1 | 0 |
| <i>Eleutherodactylus_rufifemoralis</i> | - | 0 | 1 | 0 |
| <i>Eleutherodactylus_ruthae</i>        | - | 0 | 1 | 0 |
| <i>Eleutherodactylus_schmidti</i>      | - | 0 | 1 | 0 |
| <i>Eleutherodactylus_schwartzi</i>     | - | 0 | 1 | 0 |
| <i>Eleutherodactylus_sciagraphus</i>   | - | 0 | 1 | 0 |
| <i>Eleutherodactylus_simulans</i>      | - | 0 | 1 | 0 |
| <i>Eleutherodactylus_sisyphodemus</i>  | - | 0 | 1 | 0 |
| <i>Eleutherodactylus_sommeri</i>       | - | 0 | 1 | 0 |
| <i>Eleutherodactylus_syningtoni</i>    | - | 0 | 1 | 0 |
| <i>Eleutherodactylus_thomasi</i>       | - | 0 | 1 | 0 |
| <i>Eleutherodactylus_thorectes</i>     | 1 | 0 | 1 | 0 |
| <i>Eleutherodactylus_toa</i>           | - | 0 | 1 | 0 |

|                                         |   |   |   |   |
|-----------------------------------------|---|---|---|---|
| <i>Eleutherodactylus_tonyi</i>          | - | 0 | 1 | 0 |
| <i>Eleutherodactylus_turquinensis</i>   | - | 0 | 1 | 0 |
| <i>Eleutherodactylus_unicolor</i>       | 1 | 0 | 1 | 0 |
| <i>Eleutherodactylus_varians</i>        | - | 0 | 1 | 0 |
| <i>Eleutherodactylus_varleyi</i>        | 1 | 0 | 1 | 0 |
| <i>Eleutherodactylus_ventrilineatus</i> | - | 0 | 1 | 0 |
| <i>Eleutherodactylus_weinlandi</i>      | - | 0 | 1 | 0 |
| <i>Eleutherodactylus_wetmorei</i>       | - | 0 | 1 | 0 |
| <i>Eleutherodactylus_wightmanae</i>     | - | 0 | 1 | 0 |
| <i>Eleutherodactylus_zeus</i>           | 1 | 0 | 1 | 0 |
| <i>Eleutherodactylus_zugi</i>           | 1 | 0 | 1 | 0 |
| <i>Engystomops_coloradorum</i>          | - | 0 | 0 | 0 |
| <i>Engystomops_freibergi</i>            | - | 0 | 0 | 0 |
| <i>Engystomops_guayaco</i>              | - | 0 | 0 | 0 |
| <i>Engystomops_montubio</i>             | - | 0 | 0 | 0 |
| <i>Engystomops_petersi</i>              | 1 | 0 | 0 | 0 |
| <i>Engystomops_pustulatus</i>           | - | 0 | 0 | 0 |
| <i>Engystomops_pustulosus</i>           | 1 | 0 | 0 | 0 |
| <i>Engystomops_randi</i>                | - | 0 | 0 | 0 |
| <i>Epidalea_calamita</i>                | - | 0 | 0 | 0 |
| <i>Epipedobates_anthonyi</i>            | - | 0 | 0 | 0 |
| <i>Epipedobates_boulengeri</i>          | - | 0 | 0 | 0 |
| <i>Epipedobates_espinosai</i>           | - | 0 | 0 | 0 |
| <i>Epipedobates_machalilla</i>          | 1 | 0 | 0 | 0 |
| <i>Epipedobates_tricolor</i>            | - | 0 | 0 | 0 |
| <i>Espadarana_andina</i>                | - | 0 | 0 | 0 |
| <i>Espadarana_callistomma</i>           | - | 0 | 0 | 0 |
| <i>Espadarana_prosolepon</i>            | 1 | 0 | 0 | 0 |
| <i>Eupemphix_nattereri</i>              | - | 0 | 0 | 0 |
| <i>Euphlyctis_cyanophlyctis</i>         | 0 | 0 | 0 | 0 |
| <i>Euphlyctis_ehrenbergi</i>            | 0 | 0 | 0 | 0 |
| <i>Euphlyctis_hexadactylus</i>          | 0 | 0 | 0 | 0 |
| <i>Eupsophus_calcaratus</i>             | 0 | 0 | 0 | 0 |
| <i>Eupsophus_contulmoensis</i>          | - | 0 | 0 | 0 |
| <i>Eupsophus_emiliopugini</i>           | 0 | 0 | 0 | 0 |
| <i>Eupsophus_insularis</i>              | - | 0 | 0 | 0 |
| <i>Eupsophus_migueli</i>                | - | 0 | 0 | 0 |
| <i>Eupsophus_nahuelbutensis</i>         | - | 0 | 0 | 0 |
| <i>Eupsophus_roseus</i>                 | - | 0 | 0 | 0 |
| <i>Eupsophus_vertebrales</i>            | - | 0 | 0 | 0 |
| <i>Excidobates_captivus</i>             | - | 0 | 0 | 0 |
| <i>Excidobates_mysteriosus</i>          | - | 0 | 0 | 0 |
| <i>Exerodonta_abdivita</i>              | - | 0 | 0 | 0 |
| <i>Exerodonta_chimalapa</i>             | - | 0 | 0 | 0 |

|                                   |   |   |   |   |
|-----------------------------------|---|---|---|---|
| <i>Exerodonta_melanomma</i>       | - | 0 | 0 | 0 |
| <i>Exerodonta_perkinsi</i>        | - | 0 | 0 | 0 |
| <i>Exerodonta_smaragdina</i>      | - | 0 | 0 | 0 |
| <i>Exerodonta_sumichrasti</i>     | - | 0 | 0 | 0 |
| <i>Exerodonta_xera</i>            | - | 0 | 0 | 0 |
| <i>Feihyla_palpebralis</i>        | 1 | 0 | 0 | 0 |
| <i>Fejervarya_cancrivora</i>      | 0 | 0 | 0 | 0 |
| <i>Fejervarya_caperata</i>        | - | 0 | 0 | 0 |
| <i>Fejervarya_cf_limnocharis</i>  | - | 0 | 0 | 0 |
| <i>Fejervarya_granosa</i>         | - | 0 | 0 | 0 |
| <i>Fejervarya_greeni</i>          | - | 0 | 0 | 0 |
| <i>Fejervarya_iskandari</i>       | - | 0 | 0 | 0 |
| <i>Fejervarya_kirtisinghei</i>    | - | 0 | 0 | 0 |
| <i>Fejervarya_kudremukhensis</i>  | - | 0 | 0 | 0 |
| <i>Fejervarya_limnocharis</i>     | - | 0 | 0 | 0 |
| <i>Fejervarya_mudduraja</i>       | - | 0 | 0 | 0 |
| <i>Fejervarya_orissaensis</i>     | - | 0 | 0 | 0 |
| <i>Fejervarya_pierrei</i>         | - | 0 | 0 | 0 |
| <i>Fejervarya_rufescens</i>       | 0 | 0 | 0 | 0 |
| <i>Fejervarya_sakishimensis</i>   | - | 0 | 0 | 0 |
| <i>Fejervarya_syhadrensis</i>     | - | 0 | 0 | 0 |
| <i>Fejervarya_triora</i>          | - | 0 | 0 | 0 |
| <i>Fejervarya_vittigera</i>       | 0 | 0 | 0 | 0 |
| <i>Flectonotus_fitzgeraldi</i>    | 1 | 0 | 0 | 0 |
| <i>Flectonotus_pygmaeus</i>       | 1 | 0 | 0 | 0 |
| <i>Gastrophryne_carolinensis</i>  | 0 | 0 | 0 | 0 |
| <i>Gastrophryne_elegans</i>       | - | 0 | 0 | 0 |
| <i>Gastrophryne_olivacea</i>      | 0 | 0 | 0 | 0 |
| <i>Gastrotheca_argenteovirens</i> | - | 0 | 0 | 0 |
| <i>Gastrotheca_atympana</i>       | - | 0 | 0 | 0 |
| <i>Gastrotheca_aureomaculata</i>  | - | 0 | 0 | 0 |
| <i>Gastrotheca_christiani</i>     | - | 0 | 0 | 0 |
| <i>Gastrotheca_chrysosticta</i>   | - | 0 | 0 | 0 |
| <i>Gastrotheca_cornuta</i>        | 1 | 0 | 0 | 0 |
| <i>Gastrotheca_dendronastes</i>   | - | 0 | 0 | 0 |
| <i>Gastrotheca_dunni</i>          | - | 0 | 0 | 0 |
| <i>Gastrotheca_excubitor</i>      | - | 0 | 0 | 0 |
| <i>Gastrotheca_fissipes</i>       | 1 | 0 | 0 | 0 |
| <i>Gastrotheca_galeata</i>        | 1 | 0 | 0 | 0 |
| <i>Gastrotheca_gracilis</i>       | - | 0 | 0 | 0 |
| <i>Gastrotheca_griswoldi</i>      | - | 0 | 0 | 0 |
| <i>Gastrotheca_guentheri</i>      | - | 0 | 0 | 0 |
| <i>Gastrotheca_helenae</i>        | - | 0 | 0 | 0 |
| <i>Gastrotheca_litonedis</i>      | - | 0 | 0 | 0 |

|                                     |   |   |   |   |
|-------------------------------------|---|---|---|---|
| <i>Gastrotheca_longipes</i>         | - | 0 | 0 | 0 |
| <i>Gastrotheca_marsupiata</i>       | 1 | 0 | 0 | 0 |
| <i>Gastrotheca_monticola</i>        | - | 0 | 0 | 0 |
| <i>Gastrotheca_nicefori</i>         | - | 0 | 0 | 0 |
| <i>Gastrotheca_choai</i>            | - | 0 | 0 | 0 |
| <i>Gastrotheca_orophylax</i>        | - | 0 | 0 | 0 |
| <i>Gastrotheca_peruana</i>          | - | 0 | 0 | 0 |
| <i>Gastrotheca_plumbea</i>          | - | 0 | 0 | 0 |
| <i>Gastrotheca_pseustes</i>         | - | 0 | 0 | 0 |
| <i>Gastrotheca_psychrophila</i>     | - | 0 | 0 | 0 |
| <i>Gastrotheca_riobambae</i>        | - | 0 | 0 | 0 |
| <i>Gastrotheca_ruizi</i>            | - | 0 | 0 | 0 |
| <i>Gastrotheca_stictopleura</i>     | - | 0 | 0 | 0 |
| <i>Gastrotheca_trachyceps</i>       | - | 0 | 0 | 0 |
| <i>Gastrotheca_walkerii</i>         | - | 0 | 0 | 0 |
| <i>Gastrotheca_weinlandii</i>       | - | 0 | 0 | 0 |
| <i>Gastrotheca_zeugocystis</i>      | - | 0 | 0 | 0 |
| <i>Genyophryne_thomsoni</i>         | 1 | 0 | 0 | 0 |
| <i>Geocrinia_victoriana</i>         | 1 | 0 | 0 | 0 |
| <i>Gephyromantis_ambohitra</i>      | - | 0 | 0 | 0 |
| <i>Gephyromantis_asper</i>          | - | 0 | 0 | 0 |
| <i>Gephyromantis_azzurrae</i>       | - | 0 | 0 | 0 |
| <i>Gephyromantis_blanci</i>         | - | 0 | 0 | 0 |
| <i>Gephyromantis_boulengeri</i>     | - | 0 | 0 | 0 |
| <i>Gephyromantis_cornutus</i>       | - | 0 | 0 | 0 |
| <i>Gephyromantis_corvus</i>         | - | 0 | 0 | 0 |
| <i>Gephyromantis_decaryi</i>        | 1 | 0 | 0 | 0 |
| <i>Gephyromantis_eiselti</i>        | - | 0 | 0 | 0 |
| <i>Gephyromantis_enki</i>           | - | 0 | 0 | 0 |
| <i>Gephyromantis_granulatus</i>     | - | 0 | 0 | 0 |
| <i>Gephyromantis_horridus</i>       | - | 0 | 0 | 0 |
| <i>Gephyromantis_klemmeri</i>       | - | 0 | 0 | 0 |
| <i>Gephyromantis_leucocephalus</i>  | - | 0 | 0 | 0 |
| <i>Gephyromantis_leucomaculatus</i> | - | 0 | 0 | 0 |
| <i>Gephyromantis_luteus</i>         | 1 | 0 | 0 | 0 |
| <i>Gephyromantis_malagasius</i>     | - | 0 | 0 | 0 |
| <i>Gephyromantis_moseri</i>         | - | 0 | 0 | 0 |
| <i>Gephyromantis_plicifer</i>       | - | 0 | 0 | 0 |
| <i>Gephyromantis_pseudoasper</i>    | 1 | 0 | 0 | 0 |
| <i>Gephyromantis_redimitus</i>      | - | 0 | 0 | 0 |
| <i>Gephyromantis_rivicola</i>       | - | 0 | 0 | 0 |
| <i>Gephyromantis_salegy</i>         | - | 0 | 0 | 0 |
| <i>Gephyromantis_sculpturatus</i>   | - | 0 | 0 | 0 |
| <i>Gephyromantis_silvanus</i>       | - | 0 | 0 | 0 |

|                                      |   |   |   |   |
|--------------------------------------|---|---|---|---|
| <i>Gephyromantis_striatus</i>        | - | 0 | 0 | 0 |
| <i>Gephyromantis_tandroka</i>        | - | 0 | 0 | 0 |
| <i>Gephyromantis_tschenki</i>        | - | 0 | 0 | 0 |
| <i>Gephyromantis_ventrimaculatus</i> | - | 0 | 0 | 0 |
| <i>Gephyromantis_webbi</i>           | 1 | 0 | 0 | 0 |
| <i>Gephyromantis_zavona</i>          | - | 0 | 0 | 0 |
| <i>Ghatixalus_variabilis</i>         | 0 | 0 | 0 | 0 |
| <i>Glandirana_emeljanovi</i>         | 0 | 0 | 0 | 0 |
| <i>Glandirana_minima</i>             | 0 | 0 | 0 | 0 |
| <i>Glandirana_rugosa</i>             | 0 | 0 | 0 | 0 |
| <i>Glandirana_tientaiensis</i>       | 0 | 0 | 0 | 0 |
| <i>Glyphoglossus_molossus</i>        | 0 | 0 | 0 | 0 |
| <i>Gracixalus_gracilipes</i>         | 0 | 0 | 0 | 0 |
| <i>Gracixalus_jinxiuensis</i>        | 0 | 0 | 0 | 0 |
| <i>Gracixalus_quyeti</i>             | 0 | 0 | 0 | 0 |
| <i>Guibemantis_albolineatus</i>      | - | 0 | 0 | 0 |
| <i>Guibemantis_bicalcaratus</i>      | - | 0 | 0 | 0 |
| <i>Guibemantis_depressiceps</i>      | 1 | 0 | 0 | 0 |
| <i>Guibemantis_liber</i>             | 1 | 0 | 0 | 0 |
| <i>Guibemantis_tornieri</i>          | 1 | 0 | 0 | 0 |
| <i>Haddadus_binotatus</i>            | 1 | 0 | 1 | 0 |
| <i>Hadromophryne_natalensis</i>      | 0 | 0 | 0 | 0 |
| <i>Hamptophryne_boliviana</i>        | 0 | 0 | 0 | 0 |
| <i>Heleioporus_australiacus</i>      | - | 0 | 0 | 0 |
| <i>Heleophryne_purcelli</i>          | - | 0 | 0 | 0 |
| <i>Heleophryne_regis</i>             | 0 | 0 | 0 | 0 |
| <i>Hemiphractus_bubalus</i>          | - | 0 | 0 | 0 |
| <i>Hemiphractus_helioi</i>           | - | 0 | 0 | 0 |
| <i>Hemiphractus_proboscideus</i>     | 1 | 0 | 0 | 0 |
| <i>Hemiphractus_scutatus</i>         | 1 | 0 | 0 | 0 |
| <i>Hemisis_marmoratus</i>            | 1 | 0 | 0 | 0 |
| <i>Heterixalus_alboguttatus</i>      | 1 | 0 | 0 | 0 |
| <i>Heterixalus_andrakata</i>         | - | 0 | 0 | 0 |
| <i>Heterixalus_betsileo</i>          | 1 | 0 | 0 | 0 |
| <i>Heterixalus_boettgeri</i>         | - | 0 | 0 | 0 |
| <i>Heterixalus_carbonei</i>          | - | 0 | 0 | 0 |
| <i>Heterixalus_luteostriatus</i>     | 1 | 0 | 0 | 0 |
| <i>Heterixalus_madagascariensis</i>  | - | 0 | 0 | 0 |
| <i>Heterixalus_punctatus</i>         | - | 0 | 0 | 0 |
| <i>Heterixalus_rutenbergi</i>        | - | 0 | 0 | 0 |
| <i>Heterixalus_tricolor</i>          | - | 0 | 0 | 0 |
| <i>Heterixalus_variabilis</i>        | - | 0 | 0 | 0 |
| <i>Hildebrandtia_ornata</i>          | 0 | 0 | 0 | 0 |
| <i>Holoaden_bradei</i>               | 1 | 0 | 0 | 0 |

|                                         |   |   |   |   |
|-----------------------------------------|---|---|---|---|
| <i>Holoaden_luederwaldti</i>            | - | 0 | 0 | 0 |
| <i>Hoplobatrachus_crassus</i>           | - | 0 | 0 | 0 |
| <i>Hoplobatrachus_occipitalis</i>       | 0 | 0 | 0 | 0 |
| <i>Hoplobatrachus_rugulosus</i>         | - | 0 | 0 | 0 |
| <i>Hoplobatrachus_tigerinus</i>         | 0 | 0 | 0 | 0 |
| <i>Hoplophryne_rogersi</i>              | 1 | 0 | 0 | 0 |
| <i>Hoplophryne_uluguruensis</i>         | 1 | 0 | 0 | 0 |
| <i>Huia_cavitympanum</i>                | 0 | 0 | 0 | 0 |
| <i>Huia_masonii</i>                     | - | 0 | 0 | 0 |
| <i>Huia_melasma</i>                     | - | 0 | 0 | 0 |
| <i>Huia_sumatrana</i>                   | - | 0 | 0 | 0 |
| <i>Hyalinobatrachium_antisthenesi</i>   | - | 0 | 0 | 0 |
| <i>Hyalinobatrachium_aureoguttatum</i>  | - | 0 | 0 | 0 |
| <i>Hyalinobatrachium_bergeri</i>        | - | 0 | 0 | 0 |
| <i>Hyalinobatrachium_carlesvilai</i>    | - | 0 | 0 | 0 |
| <i>Hyalinobatrachium_chirripoi</i>      | 1 | 0 | 0 | 0 |
| <i>Hyalinobatrachium_colymbiphyllum</i> | 1 | 0 | 0 | 0 |
| <i>Hyalinobatrachium_crurifasciatum</i> | - | 0 | 0 | 0 |
| <i>Hyalinobatrachium_duranti</i>        | - | 0 | 0 | 0 |
| <i>Hyalinobatrachium_eccentricum</i>    | - | 0 | 0 | 0 |
| <i>Hyalinobatrachium_eurygnathum</i>    | - | 0 | 0 | 0 |
| <i>Hyalinobatrachium_fleischmanni</i>   | 1 | 0 | 0 | 0 |
| <i>Hyalinobatrachium_fragile</i>        | - | 0 | 0 | 0 |
| <i>Hyalinobatrachium_iaspidiense</i>    | - | 0 | 0 | 0 |
| <i>Hyalinobatrachium_ibama</i>          | - | 0 | 0 | 0 |
| <i>Hyalinobatrachium_igniocus</i>       | - | 0 | 0 | 0 |
| <i>Hyalinobatrachium_mondolfii</i>      | - | 0 | 0 | 0 |
| <i>Hyalinobatrachium_orientale</i>      | - | 0 | 0 | 0 |
| <i>Hyalinobatrachium_orocostale</i>     | - | 0 | 0 | 0 |
| <i>Hyalinobatrachium_pallidum</i>       | - | 0 | 0 | 0 |
| <i>Hyalinobatrachium_pellucidum</i>     | - | 0 | 0 | 0 |
| <i>Hyalinobatrachium_talamancae</i>     | 1 | 0 | 0 | 0 |
| <i>Hyalinobatrachium_tatayoi</i>        | - | 0 | 0 | 0 |
| <i>Hyalinobatrachium_taylori</i>        | - | 0 | 0 | 0 |
| <i>Hyalinobatrachium_valerioi</i>       | 1 | 0 | 0 | 0 |
| <i>Hyla_andersonii</i>                  | 0 | 0 | 0 | 0 |
| <i>Hyla_annectans</i>                   | - | 0 | 0 | 0 |
| <i>Hyla_arborea</i>                     | 0 | 0 | 0 | 0 |
| <i>Hyla_arenicolor</i>                  | 0 | 0 | 0 | 0 |
| <i>Hyla_avivoca</i>                     | 0 | 0 | 0 | 0 |
| <i>Hyla_chinensis</i>                   | 0 | 0 | 0 | 0 |
| <i>Hyla_chrysoscelis</i>                | 0 | 0 | 0 | 0 |
| <i>Hyla_cinerea</i>                     | 0 | 0 | 0 | 0 |
| <i>Hyla_euphorbiacea</i>                | - | 0 | 0 | 0 |

|                                |   |   |   |   |
|--------------------------------|---|---|---|---|
| <i>Hyla_eximia</i>             | - | 0 | 0 | 0 |
| <i>Hyla_felixarabica</i>       | - | 0 | 0 | 0 |
| <i>Hyla_femoralis</i>          | 0 | 0 | 0 | 0 |
| <i>Hyla_gratiosa</i>           | 0 | 0 | 0 | 0 |
| <i>Hyla_immaculata</i>         | - | 0 | 0 | 0 |
| <i>Hyla_intermedia</i>         | - | 0 | 0 | 0 |
| <i>Hyla_japonica</i>           | 0 | 0 | 0 | 0 |
| <i>Hyla_meridionalis</i>       | 0 | 0 | 0 | 0 |
| <i>Hyla_molleri</i>            | - | 0 | 0 | 0 |
| <i>Hyla_orientalis</i>         | - | 0 | 0 | 0 |
| <i>Hyla_plicata</i>            | - | 0 | 0 | 0 |
| <i>Hyla_sarda</i>              | - | 0 | 0 | 0 |
| <i>Hyla_savignyi</i>           | - | 0 | 0 | 0 |
| <i>Hyla_squirella</i>          | 0 | 0 | 0 | 0 |
| <i>Hyla_tsinlingensis</i>      | - | 0 | 0 | 0 |
| <i>Hyla_versicolor</i>         | - | 0 | 0 | 0 |
| <i>Hyla_walkeri</i>            | - | 0 | 0 | 0 |
| <i>Hyla_wrightorum</i>         | - | 0 | 0 | 0 |
| <i>Hylarana_albolabris</i>     | 0 | 0 | 0 | 0 |
| <i>Hylarana_arfaki</i>         | 0 | 0 | 0 | 0 |
| <i>Hylarana_aurantiaca</i>     | 0 | 0 | 0 | 0 |
| <i>Hylarana_banjarana</i>      | 0 | 0 | 0 | 0 |
| <i>Hylarana_baramica</i>       | 0 | 0 | 0 | 0 |
| <i>Hylarana_chalconota</i>     | 0 | 0 | 0 | 0 |
| <i>Hylarana_cubitalis</i>      | 0 | 0 | 0 | 0 |
| <i>Hylarana_daemeli</i>        | 0 | 0 | 0 | 0 |
| <i>Hylarana_erythraea</i>      | 0 | 0 | 0 | 0 |
| <i>Hylarana_eschatia</i>       | 0 | 0 | 0 | 0 |
| <i>Hylarana_faber</i>          | 0 | 0 | 0 | 0 |
| <i>Hylarana_galamensis</i>     | 0 | 0 | 0 | 0 |
| <i>Hylarana_glandulosa</i>     | 0 | 0 | 0 | 0 |
| <i>Hylarana_gracilis</i>       | 0 | 0 | 0 | 0 |
| <i>Hylarana_guentheri</i>      | 0 | 0 | 0 | 0 |
| <i>Hylarana_jimiensis</i>      | 0 | 0 | 0 | 0 |
| <i>Hylarana_labialis</i>       | 0 | 0 | 0 | 0 |
| <i>Hylarana_laterimaculata</i> | 0 | 0 | 0 | 0 |
| <i>Hylarana_latouchii</i>      | 0 | 0 | 0 | 0 |
| <i>Hylarana_lepus</i>          | 0 | 0 | 0 | 0 |
| <i>Hylarana_luctuosa</i>       | 0 | 0 | 0 | 0 |
| <i>Hylarana_macroductyla</i>   | 0 | 0 | 0 | 0 |
| <i>Hylarana_malabarica</i>     | 0 | 0 | 0 | 0 |
| <i>Hylarana_maosonensis</i>    | 0 | 0 | 0 | 0 |
| <i>Hylarana_megalonesa</i>     | 0 | 0 | 0 | 0 |
| <i>Hylarana_milleti</i>        | 0 | 0 | 0 | 0 |

|                                  |   |   |   |   |
|----------------------------------|---|---|---|---|
| <i>Hylarana_miopus</i>           | 0 | 0 | 0 | 0 |
| <i>Hylarana_mocquardii</i>       | 0 | 0 | 0 | 0 |
| <i>Hylarana_nicobariensis</i>    | 0 | 0 | 0 | 0 |
| <i>Hylarana_nigrovittata</i>     | 0 | 0 | 0 | 0 |
| <i>Hylarana_parvacola</i>        | 0 | 0 | 0 | 0 |
| <i>Hylarana_picturata</i>        | 0 | 0 | 0 | 0 |
| <i>Hylarana_raniceps</i>         | 0 | 0 | 0 | 0 |
| <i>Hylarana_siberu</i>           | 0 | 0 | 0 | 0 |
| <i>Hylarana_signata</i>          | 0 | 0 | 0 | 0 |
| <i>Hylarana_spinulosa</i>        | 0 | 0 | 0 | 0 |
| <i>Hylarana_taipehensis</i>      | 0 | 0 | 0 | 0 |
| <i>Hylarana_temporalis</i>       | 0 | 0 | 0 | 0 |
| <i>Hylodes_dactylocinus</i>      | 0 | 0 | 0 | 0 |
| <i>Hylodes_meridionalis</i>      | - | 0 | 0 | 0 |
| <i>Hylodes_ornatus</i>           | - | 0 | 0 | 0 |
| <i>Hylodes_perplicatus</i>       | - | 0 | 0 | 0 |
| <i>Hylodes_phyllodes</i>         | - | 0 | 0 | 0 |
| <i>Hylodes_sazimai</i>           | - | 0 | 0 | 0 |
| <i>Hylomantis_aspera</i>         | - | 0 | 0 | 0 |
| <i>Hylomantis_granulosa</i>      | - | 0 | 0 | 0 |
| <i>Hylomantis_hulli</i>          | - | 0 | 0 | 0 |
| <i>Hylomantis_lemur</i>          | 1 | 0 | 0 | 0 |
| <i>Hylophorbus_nigrinus</i>      | - | 0 | 0 | 0 |
| <i>Hylophorbus_picoides</i>      | - | 0 | 0 | 0 |
| <i>Hylophorbus_rufescens</i>     | 1 | 0 | 0 | 0 |
| <i>Hylophorbus_tetraphonus</i>   | - | 0 | 0 | 0 |
| <i>Hylophorbus_wondiwoi</i>      | - | 0 | 0 | 0 |
| <i>Hylorina_sylvatica</i>        | 0 | 0 | 0 | 0 |
| <i>Hyloscirtus_armatus</i>       | - | 0 | 0 | 0 |
| <i>Hyloscirtus_charazani</i>     | - | 0 | 0 | 0 |
| <i>Hyloscirtus_colymba</i>       | - | 0 | 0 | 0 |
| <i>Hyloscirtus_lascinius</i>     | - | 0 | 0 | 0 |
| <i>Hyloscirtus_lindae</i>        | - | 0 | 0 | 0 |
| <i>Hyloscirtus_pacha</i>         | - | 0 | 0 | 0 |
| <i>Hyloscirtus_palmeri</i>       | - | 0 | 0 | 0 |
| <i>Hyloscirtus_pantostictus</i>  | - | 0 | 0 | 0 |
| <i>Hyloscirtus_phyllognathus</i> | - | 0 | 0 | 0 |
| <i>Hyloscirtus_simmonsii</i>     | - | 0 | 0 | 0 |
| <i>Hyloscirtus_tapichalaca</i>   | - | 0 | 0 | 0 |
| <i>Hyloxalus_anthracinus</i>     | - | 0 | 0 | 0 |
| <i>Hyloxalus_awa</i>             | - | 0 | 0 | 0 |
| <i>Hyloxalus_azureiventris</i>   | - | 0 | 0 | 0 |
| <i>Hyloxalus_bocagei</i>         | - | 0 | 0 | 0 |
| <i>Hyloxalus_chlorocraspedus</i> | - | 0 | 0 | 0 |



|                                     |   |   |   |   |
|-------------------------------------|---|---|---|---|
| <i>Hyloxalus_delatorreae</i>        | - | 0 | 0 | 0 |
| <i>Hyloxalus_elachyhistus</i>       | - | 0 | 0 | 0 |
| <i>Hyloxalus_idiomelus</i>          | - | 0 | 0 | 0 |
| <i>Hyloxalus_infraguttatus</i>      | - | 0 | 0 | 0 |
| <i>Hyloxalus_insulatus</i>          | - | 0 | 0 | 0 |
| <i>Hyloxalus_leucophaeus</i>        | - | 0 | 0 | 0 |
| <i>Hyloxalus_maculosus</i>          | - | 0 | 0 | 0 |
| <i>Hyloxalus_nexipus</i>            | - | 0 | 0 | 0 |
| <i>Hyloxalus_pulchellus</i>         | - | 0 | 0 | 0 |
| <i>Hyloxalus_pulcherrimus</i>       | - | 0 | 0 | 0 |
| <i>Hyloxalus_sauli</i>              | 1 | 0 | 0 | 0 |
| <i>Hyloxalus_sordidatus</i>         | - | 0 | 0 | 0 |
| <i>Hyloxalus_subpunctatus</i>       | - | 0 | 0 | 0 |
| <i>Hyloxalus_sylvaticus</i>         | - | 0 | 0 | 0 |
| <i>Hyloxalus_toachi</i>             | - | 0 | 0 | 0 |
| <i>Hyloxalus_vertebrales</i>        | - | 0 | 0 | 0 |
| <i>Hymenochirus_boettgeri</i>       | 0 | 0 | 0 | 0 |
| <i>Hyperolius_acuticeps</i>         | 0 | 0 | 0 | 0 |
| <i>Hyperolius_alticola</i>          | - | 0 | 0 | 0 |
| <i>Hyperolius_angolensis</i>        | - | 0 | 0 | 0 |
| <i>Hyperolius_argus</i>             | 0 | 0 | 0 | 0 |
| <i>Hyperolius_baumannii</i>         | - | 0 | 0 | 0 |
| <i>Hyperolius_castaneus</i>         | 1 | 0 | 0 | 0 |
| <i>Hyperolius_chlorosteus</i>       | - | 0 | 0 | 0 |
| <i>Hyperolius_cinnamomeoventris</i> | 1 | 0 | 0 | 0 |
| <i>Hyperolius_concolor</i>          | 1 | 0 | 0 | 0 |
| <i>Hyperolius_cystocandicans</i>    | - | 0 | 0 | 0 |
| <i>Hyperolius_frontalis</i>         | 1 | 0 | 0 | 0 |
| <i>Hyperolius_fusciventris</i>      | - | 0 | 0 | 0 |
| <i>Hyperolius_glandicolor</i>       | - | 0 | 0 | 0 |
| <i>Hyperolius_guttulatus</i>        | - | 0 | 0 | 0 |
| <i>Hyperolius_horstockii</i>        | - | 0 | 0 | 0 |
| <i>Hyperolius_kivuensis</i>         | 1 | 0 | 0 | 0 |
| <i>Hyperolius_lateralis</i>         | 1 | 0 | 0 | 0 |
| <i>Hyperolius_marmoratus</i>        | - | 0 | 0 | 0 |
| <i>Hyperolius_molleri</i>           | - | 0 | 0 | 0 |
| <i>Hyperolius_montanus</i>          | - | 0 | 0 | 0 |
| <i>Hyperolius_mosaicus</i>          | - | 0 | 0 | 0 |
| <i>Hyperolius_nasutus</i>           | 0 | 0 | 0 | 0 |
| <i>Hyperolius_ocellatus</i>         | - | 0 | 0 | 0 |
| <i>Hyperolius_pardalis</i>          | - | 0 | 0 | 0 |
| <i>Hyperolius_phantasticus</i>      | - | 0 | 0 | 0 |
| <i>Hyperolius_picturatus</i>        | - | 0 | 0 | 0 |
| <i>Hyperolius_puncticulatus</i>     | 0 | 0 | 0 | 0 |

|                                    |   |   |   |   |
|------------------------------------|---|---|---|---|
| <i>Hyperolius_pusillus</i>         | 1 | 0 | 0 | 0 |
| <i>Hyperolius_semidiscus</i>       | 0 | 0 | 0 | 0 |
| <i>Hyperolius_thomensis</i>        | - | 0 | 0 | 0 |
| <i>Hyperolius_torrentis</i>        | - | 0 | 0 | 0 |
| <i>Hyperolius_tuberculatus</i>     | - | 0 | 0 | 0 |
| <i>Hyperolius_tuberilinguis</i>    | 1 | 0 | 0 | 0 |
| <i>Hyperolius_viridiflavus</i>     | - | 0 | 0 | 0 |
| <i>Hyperolius_zonatus</i>          | - | 0 | 0 | 0 |
| <i>Hypodactylus_brunneus</i>       | - | 0 | 0 | 0 |
| <i>Hypodactylus_dolops</i>         | - | 0 | 0 | 0 |
| <i>Hypodactylus_ellipsoidiscus</i> | - | 0 | 0 | 0 |
| <i>Hypodactylus_peraccai</i>       | - | 0 | 0 | 0 |
| <i>Hypopachus_barberi</i>          | - | 0 | 0 | 0 |
| <i>Hypopachus_variolosus</i>       | 0 | 0 | 0 | 0 |
| <i>Hypsiboas_albomarginatus</i>    | 0 | 0 | 0 | 0 |
| <i>Hypsiboas_albopunctatus</i>     | 0 | 0 | 0 | 0 |
| <i>Hypsiboas_andinus</i>           | - | 0 | 0 | 0 |
| <i>Hypsiboas_balzani</i>           | - | 0 | 0 | 0 |
| <i>Hypsiboas_benitezi</i>          | - | 0 | 0 | 0 |
| <i>Hypsiboas_bischoffi</i>         | - | 0 | 0 | 0 |
| <i>Hypsiboas_boans</i>             | 0 | 0 | 0 | 0 |
| <i>Hypsiboas_caingua</i>           | - | 0 | 0 | 0 |
| <i>Hypsiboas_calcaratus</i>        | - | 0 | 0 | 0 |
| <i>Hypsiboas_cinerascens</i>       | 0 | 0 | 0 | 0 |
| <i>Hypsiboas_cordobae</i>          | - | 0 | 0 | 0 |
| <i>Hypsiboas_crepitans</i>         | - | 0 | 0 | 0 |
| <i>Hypsiboas_dentei</i>            | - | 0 | 0 | 0 |
| <i>Hypsiboas_ericae</i>            | - | 0 | 0 | 0 |
| <i>Hypsiboas_faber</i>             | - | 0 | 0 | 0 |
| <i>Hypsiboas_fasciatus</i>         | 0 | 0 | 0 | 0 |
| <i>Hypsiboas_geographicus</i>      | 0 | 0 | 0 | 0 |
| <i>Hypsiboas_guentheri</i>         | - | 0 | 0 | 0 |
| <i>Hypsiboas_heilprini</i>         | - | 0 | 0 | 0 |
| <i>Hypsiboas_joaquini</i>          | - | 0 | 0 | 0 |
| <i>Hypsiboas_lanciformis</i>       | 0 | 0 | 0 | 0 |
| <i>Hypsiboas_laticriatus</i>       | - | 0 | 0 | 0 |
| <i>Hypsiboas_lemai</i>             | - | 0 | 0 | 0 |
| <i>Hypsiboas_leptolineatus</i>     | - | 0 | 0 | 0 |
| <i>Hypsiboas_lundii</i>            | - | 0 | 0 | 0 |
| <i>Hypsiboas_marginatus</i>        | - | 0 | 0 | 0 |
| <i>Hypsiboas_marianitae</i>        | - | 0 | 0 | 0 |
| <i>Hypsiboas_microderma</i>        | - | 0 | 0 | 0 |
| <i>Hypsiboas_multifasciatus</i>    | - | 0 | 0 | 0 |
| <i>Hypsiboas_nympha</i>            | - | 0 | 0 | 0 |

|                                 |   |   |   |   |
|---------------------------------|---|---|---|---|
| <i>Hypsiboas_ornatissimus</i>   | - | 0 | 0 | 0 |
| <i>Hypsiboas_pardalis</i>       | - | 0 | 0 | 0 |
| <i>Hypsiboas_pellucens</i>      | - | 0 | 0 | 0 |
| <i>Hypsiboas_picturatus</i>     | - | 0 | 0 | 0 |
| <i>Hypsiboas_polytaenius</i>    | - | 0 | 0 | 0 |
| <i>Hypsiboas_prasinus</i>       | - | 0 | 0 | 0 |
| <i>Hypsiboas_pulchellus</i>     | - | 0 | 0 | 0 |
| <i>Hypsiboas_raniceps</i>       | - | 0 | 0 | 0 |
| <i>Hypsiboas_riojanus</i>       | - | 0 | 0 | 0 |
| <i>Hypsiboas_roraima</i>        | - | 0 | 0 | 0 |
| <i>Hypsiboas_rosenbergi</i>     | 0 | 0 | 0 | 0 |
| <i>Hypsiboas_rufitelus</i>      | 0 | 0 | 0 | 0 |
| <i>Hypsiboas_semiguttatus</i>   | 0 | 0 | 0 | 0 |
| <i>Hypsiboas_semilineatus</i>   | 0 | 0 | 0 | 0 |
| <i>Hypsiboas_sibleszi</i>       | 0 | 0 | 0 | 0 |
| <i>Ikakogi_tayrona</i>          | 1 | 0 | 0 | 0 |
| <i>Incilius_alvarius</i>        | - | 0 | 0 | 0 |
| <i>Incilius_bocourti</i>        | - | 0 | 0 | 0 |
| <i>Incilius_campbelli</i>       | - | 0 | 0 | 0 |
| <i>Incilius_canaliferus</i>     | - | 0 | 0 | 0 |
| <i>Incilius_coccifer</i>        | - | 0 | 0 | 0 |
| <i>Incilius_coniferus</i>       | - | 0 | 0 | 0 |
| <i>Incilius_cycladen</i>        | - | 0 | 0 | 0 |
| <i>Incilius_fastidiosus</i>     | - | 0 | 0 | 0 |
| <i>Incilius_ibarra</i>          | - | 0 | 0 | 0 |
| <i>Incilius_luetkenii</i>       | - | 0 | 0 | 0 |
| <i>Incilius_macrocristatus</i>  | - | 0 | 0 | 0 |
| <i>Incilius_marmoreus</i>       | - | 0 | 0 | 0 |
| <i>Incilius_mazatlanensis</i>   | - | 0 | 0 | 0 |
| <i>Incilius_melanochlorus</i>   | - | 0 | 0 | 0 |
| <i>Incilius_nebulifer</i>       | - | 0 | 0 | 0 |
| <i>Incilius_occidentalis</i>    | - | 0 | 0 | 0 |
| <i>Incilius_tacanensis</i>      | - | 0 | 0 | 0 |
| <i>Incilius_valliceps</i>       | - | 0 | 0 | 0 |
| <i>Indirana_beddomii</i>        | 1 | 0 | 0 | 0 |
| <i>Indirana_semipalmata</i>     | - | 0 | 0 | 0 |
| <i>Indirana_sp._A_FB-2000</i>   | - | 0 | 0 | 0 |
| <i>Indirana_sp._B_FB-2000</i>   | - | 0 | 0 | 0 |
| <i>Ingerana_baluensis</i>       | 1 | 0 | 0 | 0 |
| <i>Ingerana_tenasserimensis</i> | - | 0 | 0 | 0 |
| <i>Ingerophrynus_biporcatus</i> | - | 0 | 0 | 0 |
| <i>Ingerophrynus_celebensis</i> | - | 0 | 0 | 0 |
| <i>Ingerophrynus_divergens</i>  | - | 0 | 0 | 0 |
| <i>Ingerophrynus_galeatus</i>   | - | 0 | 0 | 0 |

|                                    |   |   |   |   |
|------------------------------------|---|---|---|---|
| <i>Ingerophrynus_macrotis</i>      | - | 0 | 0 | 0 |
| <i>Ingerophrynus_philippinicus</i> | - | 0 | 0 | 0 |
| <i>Insuetophrynus_acarpicus</i>    | - | 0 | 0 | 0 |
| <i>Ischnocnema_guentheri</i>       | 1 | 0 | 0 | 0 |
| <i>Ischnocnema_hoehnei</i>         | - | 0 | 0 | 0 |
| <i>Ischnocnema_holti</i>           | - | 0 | 0 | 0 |
| <i>Ischnocnema_juipoca</i>         | - | 0 | 0 | 0 |
| <i>Ischnocnema_parva</i>           | 1 | 0 | 0 | 0 |
| <i>Isthmohyla_pseudopuma</i>       | 0 | 0 | 0 | 0 |
| <i>Isthmohyla_rivularis</i>        | - | 0 | 0 | 0 |
| <i>Isthmohyla_tica</i>             | - | 0 | 0 | 0 |
| <i>Isthmohyla_zeteki</i>           | - | 0 | 0 | 0 |
| <i>Itaputihyla_langsdorffii</i>    | 0 | 0 | 0 | 0 |
| <i>Kalophrynus_baluensis</i>       | - | 0 | 0 | 0 |
| <i>Kalophrynus_intermedius</i>     | - | 0 | 0 | 0 |
| <i>Kalophrynus_pleurostigma</i>    | 0 | 0 | 0 | 0 |
| <i>Kaloula_conjuncta</i>           | - | 0 | 0 | 0 |
| <i>Kaloula_pulchra</i>             | 0 | 0 | 0 | 0 |
| <i>Kaloula_taprobatica</i>         | 0 | 0 | 0 | 0 |
| <i>Kassina_maculata</i>            | 0 | 0 | 0 | 0 |
| <i>Kassina_senegalensis</i>        | 0 | 0 | 0 | 0 |
| <i>Kurixalus_banaensis</i>         | - | 0 | 0 | 0 |
| <i>Kurixalus_carinensis</i>        | - | 0 | 0 | 0 |
| <i>Kurixalus_eiffingeri</i>        | 1 | 0 | 0 | 0 |
| <i>Kurixalus_hainanus</i>          | - | 0 | 0 | 0 |
| <i>Kurixalus_idiootocus</i>        | 1 | 0 | 0 | 0 |
| <i>Kurixalus_odontotarsus</i>      | - | 0 | 0 | 0 |
| <i>Laliostoma_labrosum</i>         | 0 | 0 | 0 | 0 |
| <i>Lankanectes_corrugatus</i>      | - | 0 | 0 | 0 |
| <i>Lechriodus_fletcheri</i>        | 1 | 0 | 0 | 0 |
| <i>Leiopelma_archeyi</i>           | 1 | 0 | 0 | 0 |
| <i>Leiopelma_hamiltoni</i>         | - | 0 | 0 | 0 |
| <i>Leiopelma_hochstetteri</i>      | 0 | 0 | 0 | 0 |
| <i>Leiopelma_pakeka</i>            | 1 | 0 | 0 | 0 |
| <i>Lepidobatrachus_laevis</i>      | 0 | 0 | 0 | 0 |
| <i>Leptobrachium_abbotti</i>       | - | 0 | 0 | 0 |
| <i>Leptobrachium_ailaonicum</i>    | - | 0 | 0 | 0 |
| <i>Leptobrachium_banae</i>         | - | 0 | 0 | 0 |
| <i>Leptobrachium_boringii</i>      | 0 | 0 | 0 | 0 |
| <i>Leptobrachium_chapaense</i>     | - | 0 | 0 | 0 |
| <i>Leptobrachium_gunungense</i>    | - | 0 | 0 | 0 |
| <i>Leptobrachium_hainanense</i>    | - | 0 | 0 | 0 |
| <i>Leptobrachium_hasseltii</i>     | - | 0 | 0 | 0 |
| <i>Leptobrachium_hendricksoni</i>  | - | 0 | 0 | 0 |

|                                       |   |   |   |   |
|---------------------------------------|---|---|---|---|
| <i>Leptobrachium_huashen</i>          | - | 0 | 0 | 0 |
| <i>Leptobrachium_leishanense</i>      | - | 0 | 0 | 0 |
| <i>Leptobrachium_liui</i>             | - | 0 | 0 | 0 |
| <i>Leptobrachium_montanum</i>         | - | 0 | 0 | 0 |
| <i>Leptobrachium_mouhoti</i>          | - | 0 | 0 | 0 |
| <i>Leptobrachium_ngoclinhense</i>     | - | 0 | 0 | 0 |
| <i>Leptobrachium_nigrops</i>          | - | 0 | 0 | 0 |
| <i>Leptobrachium_promustache</i>      | - | 0 | 0 | 0 |
| <i>Leptobrachium_smithi</i>           | - | 0 | 0 | 0 |
| <i>Leptobrachium_sp._ABTC_76306</i>   | - | 0 | 0 | 0 |
| <i>Leptobrachium_sp._KUHE_UN_AS2</i>  | - | 0 | 0 | 0 |
| <i>Leptobrachium_waysepuntiense</i>   | - | 0 | 0 | 0 |
| <i>Leptobrachium_xanthospilum</i>     | - | 0 | 0 | 0 |
| <i>Leptodactylodon_bicolor</i>        | 0 | 0 | 0 | 0 |
| <i>Leptodactylus_albilabris</i>       | - | 0 | 0 | 0 |
| <i>Leptodactylus_bufonius</i>         | - | 0 | 0 | 0 |
| <i>Leptodactylus_chaquensis</i>       | 1 | 0 | 0 | 0 |
| <i>Leptodactylus_didymus</i>          | - | 0 | 0 | 0 |
| <i>Leptodactylus_diedrus</i>          | - | 0 | 0 | 0 |
| <i>Leptodactylus_discodactylus</i>    | 1 | 0 | 0 | 0 |
| <i>Leptodactylus_elenae</i>           | - | 0 | 0 | 0 |
| <i>Leptodactylus_fallax</i>           | 1 | 0 | 0 | 0 |
| <i>Leptodactylus_fuscus</i>           | 1 | 0 | 0 | 0 |
| <i>Leptodactylus_gracilis</i>         | - | 0 | 0 | 0 |
| <i>Leptodactylus_griseigularis</i>    | - | 0 | 0 | 0 |
| <i>Leptodactylus_knudseni</i>         | - | 0 | 0 | 0 |
| <i>Leptodactylus_labyrinthicus</i>    | 1 | 0 | 0 | 0 |
| <i>Leptodactylus_leptodactyloides</i> | - | 0 | 0 | 0 |
| <i>Leptodactylus_longirostris</i>     | - | 0 | 0 | 0 |
| <i>Leptodactylus_melanonotus</i>      | 1 | 0 | 0 | 0 |
| <i>Leptodactylus_mystaceus</i>        | 1 | 0 | 0 | 0 |
| <i>Leptodactylus_mystacinus</i>       | 1 | 0 | 0 | 0 |
| <i>Leptodactylus_notoaktites</i>      | - | 0 | 0 | 0 |
| <i>Leptodactylus_ocellatus</i>        | - | 0 | 0 | 0 |
| <i>Leptodactylus_pallidirostris</i>   | - | 0 | 0 | 0 |
| <i>Leptodactylus_pentadactylus</i>    | 1 | 0 | 0 | 0 |
| <i>Leptodactylus_plaumanni</i>        | - | 0 | 0 | 0 |
| <i>Leptodactylus_podicipinus</i>      | - | 0 | 0 | 0 |
| <i>Leptodactylus_rhodomystax</i>      | 1 | 0 | 0 | 0 |
| <i>Leptodactylus_rhodonotus</i>       | - | 0 | 0 | 0 |
| <i>Leptodactylus_riveroi</i>          | - | 0 | 0 | 0 |
| <i>Leptodactylus_silvanimbus</i>      | - | 0 | 0 | 0 |
| <i>Leptodactylus_spixi</i>            | - | 0 | 0 | 0 |
| <i>Leptodactylus_validus</i>          | - | 0 | 0 | 0 |

|                                     |   |   |   |   |
|-------------------------------------|---|---|---|---|
| <i>Leptodactylus_vastus</i>         | - | 0 | 0 | 0 |
| <i>Leptodactylus_wagneri</i>        | 1 | 0 | 0 | 0 |
| <i>Leptolalax_arayai</i>            | - | 0 | 0 | 0 |
| <i>Leptolalax_bourreti</i>          | - | 0 | 0 | 0 |
| <i>Leptolalax_liui</i>              | - | 0 | 0 | 0 |
| <i>Leptolalax_oshanensis</i>        | - | 0 | 0 | 0 |
| <i>Leptolalax_pelodytoides</i>      | - | 0 | 0 | 0 |
| <i>Leptolalax_pictus</i>            | - | 0 | 0 | 0 |
| <i>Leptopelis_argenteus</i>         | 1 | 0 | 0 | 0 |
| <i>Leptopelis_bocagii</i>           | - | 0 | 0 | 0 |
| <i>Leptopelis_brevirostris</i>      | - | 0 | 0 | 0 |
| <i>Leptopelis_concolor</i>          | - | 0 | 0 | 0 |
| <i>Leptopelis_kivuensis</i>         | - | 0 | 0 | 0 |
| <i>Leptopelis_modestus</i>          | - | 0 | 0 | 0 |
| <i>Leptopelis_natalensis</i>        | 1 | 0 | 0 | 0 |
| <i>Leptopelis_palmatus</i>          | - | 0 | 0 | 0 |
| <i>Leptopelis_vermiculatus</i>      | - | 0 | 0 | 0 |
| <i>Leptophryne_borbonica</i>        | 0 | 0 | 0 | 0 |
| <i>Limnodynastes_convexiusculus</i> | - | 0 | 0 | 0 |
| <i>Limnodynastes_depressus</i>      | - | 0 | 0 | 0 |
| <i>Limnodynastes_dorsalis</i>       | - | 0 | 0 | 0 |
| <i>Limnodynastes_dumerilii</i>      | - | 0 | 0 | 0 |
| <i>Limnodynastes_fletcheri</i>      | 1 | 0 | 0 | 0 |
| <i>Limnodynastes_interioris</i>     | - | 0 | 0 | 0 |
| <i>Limnodynastes_ornatus</i>        | - | 0 | 0 | 0 |
| <i>Limnodynastes_peronii</i>        | 1 | 0 | 0 | 0 |
| <i>Limnodynastes_salmini</i>        | 1 | 0 | 0 | 0 |
| <i>Limnodynastes_spenceri</i>       | - | 0 | 0 | 0 |
| <i>Limnodynastes_tasmaniensis</i>   | 1 | 0 | 0 | 0 |
| <i>Limnodynastes_terraereginae</i>  | - | 0 | 0 | 0 |
| <i>Limnomedusa_macroglossa</i>      | 0 | 0 | 0 | 0 |
| <i>Limnonectes_acanthi</i>          | - | 0 | 0 | 0 |
| <i>Limnonectes_arathooni</i>        | - | 0 | 0 | 0 |
| <i>Limnonectes_asperatus</i>        | - | 0 | 0 | 0 |
| <i>Limnonectes_bannaensis</i>       | - | 0 | 0 | 0 |
| <i>Limnonectes_blythii</i>          | 0 | 0 | 0 | 0 |
| <i>Limnonectes_dabanus</i>          | - | 0 | 0 | 0 |
| <i>Limnonectes_finchi</i>           | 1 | 0 | 0 | 0 |
| <i>Limnonectes_fragilis</i>         | - | 0 | 0 | 0 |
| <i>Limnonectes_fujianensis</i>      | - | 0 | 0 | 0 |
| <i>Limnonectes_grunniens</i>        | - | 0 | 0 | 0 |
| <i>Limnonectes_gyldenstolpei</i>    | - | 0 | 0 | 0 |
| <i>Limnonectes_hascheanus</i>       | - | 0 | 0 | 0 |
| <i>Limnonectes_heinrichi</i>        | - | 0 | 0 | 0 |

|                                  |   |   |   |   |
|----------------------------------|---|---|---|---|
| <i>Limnonectes ibanorum</i>      | - | 0 | 0 | 0 |
| <i>Limnonectes ingeri</i>        | - | 0 | 0 | 0 |
| <i>Limnonectes kadarsani</i>     | - | 0 | 0 | 0 |
| <i>Limnonectes kuhlii</i>        | 0 | 0 | 0 | 0 |
| <i>Limnonectes laticeps</i>      | - | 0 | 0 | 0 |
| <i>Limnonectes leporinus</i>     | 0 | 0 | 0 | 0 |
| <i>Limnonectes leytensis</i>     | 1 | 0 | 0 | 0 |
| <i>Limnonectes limborgi</i>      | - | 0 | 0 | 0 |
| <i>Limnonectes macrocephalus</i> | - | 0 | 0 | 0 |
| <i>Limnonectes macrodon</i>      | - | 0 | 0 | 0 |
| <i>Limnonectes magnus</i>        | 1 | 0 | 0 | 0 |
| <i>Limnonectes malesianus</i>    | 0 | 0 | 0 | 0 |
| <i>Limnonectes microdiscus</i>   | 1 | 0 | 0 | 0 |
| <i>Limnonectes microtypanum</i>  | - | 0 | 0 | 0 |
| <i>Limnonectes modestus</i>      | - | 0 | 0 | 0 |
| <i>Limnonectes palavanensis</i>  | - | 0 | 0 | 0 |
| <i>Limnonectes paramacrodon</i>  | - | 0 | 0 | 0 |
| <i>Limnonectes parvus</i>        | - | 0 | 0 | 0 |
| <i>Limnonectes poilani</i>       | - | 0 | 0 | 0 |
| <i>Limnonectes shompenorum</i>   | - | 0 | 0 | 0 |
| <i>Limnonectes sp. A_FB-2006</i> | - | 0 | 0 | 0 |
| <i>Limnonectes sp. B_FB-2006</i> | - | 0 | 0 | 0 |
| <i>Limnonectes visayanus</i>     | - | 0 | 0 | 0 |
| <i>Limnonectes woodworthi</i>    | - | 0 | 0 | 0 |
| <i>Liophryne dentata</i>         | - | 0 | 0 | 0 |
| <i>Liophryne rhododactyla</i>    | 1 | 0 | 0 | 0 |
| <i>Liophryne schlaginhaufeni</i> | 1 | 0 | 0 | 0 |
| <i>Lithodytes lineatus</i>       | 1 | 0 | 0 | 0 |
| <i>Litoria adelaidensis</i>      | - | 0 | 0 | 0 |
| <i>Litoria amboinensis</i>       | - | 0 | 0 | 0 |
| <i>Litoria andiirmalin</i>       | - | 0 | 0 | 0 |
| <i>Litoria angiana</i>           | - | 0 | 0 | 0 |
| <i>Litoria arfakiana</i>         | - | 0 | 0 | 0 |
| <i>Litoria aurea</i>             | - | 0 | 0 | 0 |
| <i>Litoria barringtonensis</i>   | - | 0 | 0 | 0 |
| <i>Litoria bicolor</i>           | - | 0 | 0 | 0 |
| <i>Litoria booroolongensis</i>   | - | 0 | 0 | 0 |
| <i>Litoria brevipalmata</i>      | - | 0 | 0 | 0 |
| <i>Litoria burrowsi</i>          | - | 0 | 0 | 0 |
| <i>Litoria caerulea</i>          | 0 | 0 | 0 | 0 |
| <i>Litoria cavernicola</i>       | - | 0 | 0 | 0 |
| <i>Litoria chloris</i>           | - | 0 | 0 | 0 |
| <i>Litoria citropa</i>           | - | 0 | 0 | 0 |
| <i>Litoria congenita</i>         | - | 0 | 0 | 0 |

|                              |   |   |   |   |
|------------------------------|---|---|---|---|
| <i>Litoria_coplandi</i>      | - | 0 | 0 | 0 |
| <i>Litoria_cyclorhyncha</i>  | - | 0 | 0 | 0 |
| <i>Litoria_dahlii</i>        | - | 0 | 0 | 0 |
| <i>Litoria_darlingtoni</i>   | - | 0 | 0 | 0 |
| <i>Litoria_daviesae</i>      | - | 0 | 0 | 0 |
| <i>Litoria_dentata</i>       | - | 0 | 0 | 0 |
| <i>Litoria_dorsalis</i>      | - | 0 | 0 | 0 |
| <i>Litoria_dux</i>           | - | 0 | 0 | 0 |
| <i>Litoria_electrica</i>     | - | 0 | 0 | 0 |
| <i>Litoria_eucnemis</i>      | - | 0 | 0 | 0 |
| <i>Litoria_ewingii</i>       | - | 0 | 0 | 0 |
| <i>Litoria_exophthalmia</i>  | - | 0 | 0 | 0 |
| <i>Litoria_fallax</i>        | - | 0 | 0 | 0 |
| <i>Litoria_freycineti</i>    | - | 0 | 0 | 0 |
| <i>Litoria_genimaculata</i>  | 0 | 0 | 0 | 0 |
| <i>Litoria_gilleni</i>       | - | 0 | 0 | 0 |
| <i>Litoria_gracilentata</i>  | - | 0 | 0 | 0 |
| <i>Litoria_havina</i>        | 1 | 0 | 0 | 0 |
| <i>Litoria_impura</i>        | - | 0 | 0 | 0 |
| <i>Litoria_inermis</i>       | 0 | 0 | 0 | 0 |
| <i>Litoria_infrafrenata</i>  | - | 0 | 0 | 0 |
| <i>Litoria_iris</i>          | - | 0 | 0 | 0 |
| <i>Litoria_jervisiensis</i>  | - | 0 | 0 | 0 |
| <i>Litoria_jungguy</i>       | - | 0 | 0 | 0 |
| <i>Litoria_kumae</i>         | - | 0 | 0 | 0 |
| <i>Litoria_latopalmata</i>   | - | 0 | 0 | 0 |
| <i>Litoria_lesueurii</i>     | - | 0 | 0 | 0 |
| <i>Litoria_leucova</i>       | - | 0 | 0 | 0 |
| <i>Litoria_littlejohni</i>   | - | 0 | 0 | 0 |
| <i>Litoria_longirostris</i>  | 1 | 0 | 0 | 0 |
| <i>Litoria_majikthise</i>    | - | 0 | 0 | 0 |
| <i>Litoria_meiriana</i>      | - | 0 | 0 | 0 |
| <i>Litoria_microbelos</i>    | - | 0 | 0 | 0 |
| <i>Litoria_micromembrana</i> | - | 0 | 0 | 0 |
| <i>Litoria_modica</i>        | - | 0 | 0 | 0 |
| <i>Litoria_moorei</i>        | - | 0 | 0 | 0 |
| <i>Litoria_multiplica</i>    | - | 0 | 0 | 0 |
| <i>Litoria_nannotis</i>      | - | 0 | 0 | 0 |
| <i>Litoria_nasuta</i>        | 0 | 0 | 0 | 0 |
| <i>Litoria_nigrofrenata</i>  | - | 0 | 0 | 0 |
| <i>Litoria_nigropunctata</i> | - | 0 | 0 | 0 |
| <i>Litoria_nudidigitus</i>   | - | 0 | 0 | 0 |
| <i>Litoria_nyakalensis</i>   | - | 0 | 0 | 0 |
| <i>Litoria_olongburensis</i> | - | 0 | 0 | 0 |



|                                  |   |   |   |   |
|----------------------------------|---|---|---|---|
| <i>Litoria pallida</i>           | 0 | 0 | 0 | 0 |
| <i>Litoria paraewingi</i>        | - | 0 | 0 | 0 |
| <i>Litoria pearsoniana</i>       | 0 | 0 | 0 | 0 |
| <i>Litoria peronii</i>           | - | 0 | 0 | 0 |
| <i>Litoria personata</i>         | - | 0 | 0 | 0 |
| <i>Litoria phyllochroa</i>       | - | 0 | 0 | 0 |
| <i>Litoria pronimia</i>          | - | 0 | 0 | 0 |
| <i>Litoria prora</i>             | - | 0 | 0 | 0 |
| <i>Litoria raniformis</i>        | - | 0 | 0 | 0 |
| <i>Litoria revelata</i>          | - | 0 | 0 | 0 |
| <i>Litoria rheocola</i>          | - | 0 | 0 | 0 |
| <i>Litoria rothii</i>            | 0 | 0 | 0 | 0 |
| <i>Litoria rubella</i>           | 0 | 0 | 0 | 0 |
| <i>Litoria spartacus</i>         | - | 0 | 0 | 0 |
| <i>Litoria spenceri</i>          | 0 | 0 | 0 | 0 |
| <i>Litoria splendida</i>         | - | 0 | 0 | 0 |
| <i>Litoria subglandulosa</i>     | 0 | 0 | 0 | 0 |
| <i>Litoria thesaurensis</i>      | - | 0 | 0 | 0 |
| <i>Litoria tornieri</i>          | 0 | 0 | 0 | 0 |
| <i>Litoria tyleri</i>            | - | 0 | 0 | 0 |
| <i>Litoria verreauxii</i>        | - | 0 | 0 | 0 |
| <i>Litoria watjulumensis</i>     | 0 | 0 | 0 | 0 |
| <i>Litoria wilcoxii</i>          | - | 0 | 0 | 0 |
| <i>Litoria wollastoni</i>        | - | 0 | 0 | 0 |
| <i>Litoria xanthomera</i>        | - | 0 | 0 | 0 |
| <i>Liuixalus hainanus</i>        | - | 0 | 0 | 0 |
| <i>Liuixalus romeri</i>          | 0 | 0 | 0 | 0 |
| <i>Lynchius flavomaculatus</i>   | 1 | 0 | 0 | 0 |
| <i>Lynchius nebulanastes</i>     | - | 0 | 0 | 0 |
| <i>Lynchius parkeri</i>          | - | 0 | 0 | 0 |
| <i>Macrogenioglottus alipioi</i> | 0 | 0 | 0 | 0 |
| <i>Mannophryne herminae</i>      | - | 0 | 0 | 0 |
| <i>Mannophryne trinitatis</i>    | 1 | 0 | 0 | 0 |
| <i>Mannophryne venezuelensis</i> | - | 0 | 0 | 0 |
| <i>Mantella aurantiaca</i>       | 1 | 0 | 0 | 0 |
| <i>Mantella baroni</i>           | 1 | 0 | 0 | 0 |
| <i>Mantella bernhardi</i>        | - | 0 | 0 | 0 |
| <i>Mantella betsileo</i>         | - | 0 | 0 | 0 |
| <i>Mantella cowani</i>           | - | 0 | 0 | 0 |
| <i>Mantella crocea</i>           | - | 0 | 0 | 0 |
| <i>Mantella ebenau</i>           | - | 0 | 0 | 0 |
| <i>Mantella expectata</i>        | - | 0 | 0 | 0 |
| <i>Mantella haraldmeieri</i>     | - | 0 | 0 | 0 |
| <i>Mantella laevigata</i>        | 1 | 0 | 0 | 0 |

|                                             |   |   |   |   |
|---------------------------------------------|---|---|---|---|
| <i>Mantella_madagascariensis</i>            | - | 0 | 0 | 0 |
| <i>Mantella_manery</i>                      | - | 0 | 0 | 0 |
| <i>Mantella_milotympanum</i>                | - | 0 | 0 | 0 |
| <i>Mantella_nigricans</i>                   | - | 0 | 0 | 0 |
| <i>Mantella_pulchra</i>                     | - | 0 | 0 | 0 |
| <i>Mantella_viridis</i>                     | - | 0 | 0 | 0 |
| <i>Mantidactylus_ambreensis</i>             | - | 0 | 0 | 0 |
| <i>Mantidactylus_argenteus</i>              | - | 0 | 0 | 0 |
| <i>Mantidactylus_biporus</i>                | - | 0 | 0 | 0 |
| <i>Mantidactylus_charlotteae</i>            | - | 0 | 0 | 0 |
| <i>Mantidactylus_femoralis</i>              | - | 0 | 0 | 0 |
| <i>Mantidactylus_grandidieri</i>            | - | 0 | 0 | 0 |
| <i>Mantidactylus_lugubris</i>               | - | 0 | 0 | 0 |
| <i>Mantidactylus_mocquardi</i>              | - | 0 | 0 | 0 |
| <i>Mantidactylus_opiparis</i>               | - | 0 | 0 | 0 |
| <i>Mantidactylus_ulcerosus</i>              | 1 | 0 | 0 | 0 |
| <i>Megaelosia_goeldii</i>                   | 0 | 0 | 0 | 0 |
| <i>Megastomatohyla_mixe</i>                 | - | 0 | 0 | 0 |
| <i>Megistolotis_lignarius</i>               | - | 0 | 0 | 0 |
| <i>Megophrys_nasuta</i>                     | 0 | 0 | 0 | 0 |
| <i>Melanobatrachus_indicus</i>              | - | 0 | 0 | 0 |
| <i>Melanophryniscus_klappenbachi</i>        | - | 0 | 0 | 0 |
| <i>Melanophryniscus_rubriventris</i>        | - | 0 | 0 | 0 |
| <i>Melanophryniscus_stelzneri</i>           | - | 0 | 0 | 0 |
| <i>Meristogenys_cf._orphocnemis_KR-2003</i> | - | 0 | 0 | 0 |
| <i>Meristogenys_jerboa</i>                  | 0 | 0 | 0 | 0 |
| <i>Meristogenys_kinabaluensis</i>           | - | 0 | 0 | 0 |
| <i>Meristogenys_orphocnemis</i>             | - | 0 | 0 | 0 |
| <i>Meristogenys_phaeomerus</i>              | - | 0 | 0 | 0 |
| <i>Meristogenys_poecilus</i>                | - | 0 | 0 | 0 |
| <i>Meristogenys_whiteheadi</i>              | - | 0 | 0 | 0 |
| <i>Mertensophryne_lindneri</i>              | - | 0 | 0 | 0 |
| <i>Mertensophryne_micranotis</i>            | 0 | 0 | 0 | 0 |
| <i>Mertensophryne_taitana</i>               | - | 0 | 0 | 0 |
| <i>Mertensophryne_uzunguensis</i>           | - | 0 | 0 | 0 |
| <i>Metacrinia_nichollsi</i>                 | 1 | 0 | 0 | 0 |
| <i>Metamagnusia_slateri</i>                 | - | 0 | 0 | 0 |
| <i>Metaphrynella_sundana</i>                | 0 | 0 | 0 | 0 |
| <i>Micrixalus_fuscus</i>                    | - | 0 | 0 | 0 |
| <i>Micrixalus_kottigeharensis</i>           | - | 0 | 0 | 0 |
| <i>Micrixalus_sp._FB-2006</i>               | - | 0 | 0 | 0 |
| <i>Micrixalus_sp._VUB_0013</i>              | - | 0 | 0 | 0 |
| <i>Microbatrachella_capensis</i>            | 0 | 0 | 0 | 0 |
| <i>Microhyla_borneensis</i>                 | - | 0 | 0 | 0 |

|                                     |   |   |   |   |
|-------------------------------------|---|---|---|---|
| <i>Microhyla_butleri</i>            | - | 0 | 0 | 0 |
| <i>Microhyla_fissipes</i>           | - | 0 | 0 | 0 |
| <i>Microhyla_heymonsi</i>           | 0 | 0 | 0 | 0 |
| <i>Microhyla_okinavensis</i>        | 0 | 0 | 0 | 0 |
| <i>Microhyla_ornata</i>             | 0 | 0 | 0 | 0 |
| <i>Microhyla_pulchra</i>            | - | 0 | 0 | 0 |
| <i>Microhyla_rubra</i>              | - | 0 | 0 | 0 |
| <i>Micryletta_inornata</i>          | 0 | 0 | 0 | 0 |
| <i>Minyobates_steyermarki</i>       | - | 0 | 0 | 0 |
| <i>Mixophyes_balbus</i>             | - | 0 | 0 | 0 |
| <i>Mixophyes_carbinensis</i>        | - | 0 | 0 | 0 |
| <i>Mixophyes_coggeri</i>            | - | 0 | 0 | 0 |
| <i>Mixophyes_fasciolatus</i>        | - | 0 | 0 | 0 |
| <i>Mixophyes_schevilli</i>          | - | 0 | 0 | 0 |
| <i>Morerella_cyanophthalma</i>      | - | 0 | 0 | 0 |
| <i>Myersiophyla_inparquesi</i>      | - | 0 | 0 | 0 |
| <i>Myersiophyla_kanaima</i>         | - | 0 | 0 | 0 |
| <i>Myobatrachus_gouldii</i>         | 1 | 0 | 0 | 0 |
| <i>Nannophryne_cophotis</i>         | - | 0 | 0 | 0 |
| <i>Nannophryne_variegata</i>        | - | 0 | 0 | 0 |
| <i>Nannophrys_ceylonensis</i>       | 1 | 0 | 0 | 0 |
| <i>Nannophrys_marmorata</i>         | - | 0 | 0 | 0 |
| <i>Nanorana_aenea</i>               | - | 0 | 0 | 0 |
| <i>Nanorana_arnoldi</i>             | - | 0 | 0 | 0 |
| <i>Nanorana_bourreti</i>            | - | 0 | 0 | 0 |
| <i>Nanorana_chayuensis</i>          | - | 0 | 0 | 0 |
| <i>Nanorana_conaensis</i>           | - | 0 | 0 | 0 |
| <i>Nanorana_delacouri</i>           | - | 0 | 0 | 0 |
| <i>Nanorana_liebigii</i>            | - | 0 | 0 | 0 |
| <i>Nanorana_liui</i>                | - | 0 | 0 | 0 |
| <i>Nanorana_maculosa</i>            | - | 0 | 0 | 0 |
| <i>Nanorana_medogensis</i>          | - | 0 | 0 | 0 |
| <i>Nanorana_parkeri</i>             | 0 | 0 | 0 | 0 |
| <i>Nanorana_pleskei</i>             | 0 | 0 | 0 | 0 |
| <i>Nanorana_quadranus</i>           | - | 0 | 0 | 0 |
| <i>Nanorana_taihangnica</i>         | - | 0 | 0 | 0 |
| <i>Nanorana_unculuanus</i>          | - | 0 | 0 | 0 |
| <i>Nanorana_ventripunctata</i>      | - | 0 | 0 | 0 |
| <i>Nanorana_yunnanensis</i>         | - | 0 | 0 | 0 |
| <i>Nasikabatrachus_sahyadrensis</i> | - | 0 | 0 | 0 |
| <i>Natalobatrachus_bonebergi</i>    | 1 | 0 | 0 | 0 |
| <i>Nectophryne_afra</i>             | 0 | 0 | 0 | 0 |
| <i>Nectophryne_batesii</i>          | 0 | 0 | 0 | 0 |
| <i>Nectophrynoides_minutus</i>      | 1 | 0 | 0 | 0 |

|                                        |   |   |   |   |
|----------------------------------------|---|---|---|---|
| <i>Nectophrynooides_tornieri</i>       | 1 | 0 | 0 | 0 |
| <i>Nectophrynooides_viviparus</i>      | 1 | 0 | 0 | 0 |
| <i>Nelsonophryne_aequatorialis</i>     | 0 | 0 | 0 | 0 |
| <i>Neobatrachus_pelobatooides</i>      | - | 0 | 0 | 0 |
| <i>Neobatrachus_pictus</i>             | - | 0 | 0 | 0 |
| <i>Neobatrachus_sudelli</i>            | 0 | 0 | 0 | 0 |
| <i>Noblella_lochites</i>               | - | 0 | 0 | 0 |
| <i>Noblella_peruviana</i>              | - | 0 | 0 | 0 |
| <i>Notaden_bennettii</i>               | - | 0 | 0 | 0 |
| <i>Notaden_melanoscaphus</i>           | 0 | 0 | 0 | 0 |
| <i>Nyctibates_corrugatus</i>           | 0 | 0 | 0 | 0 |
| <i>Nyctibatrachus_acanthodermis</i>    | - | 0 | 0 | 0 |
| <i>Nyctibatrachus_aliciae</i>          | - | 0 | 0 | 0 |
| <i>Nyctibatrachus_anamallaiensis</i>   | - | 0 | 0 | 0 |
| <i>Nyctibatrachus_beddombii</i>        | - | 0 | 0 | 0 |
| <i>Nyctibatrachus_cf_aliciae</i>       | - | 0 | 0 | 0 |
| <i>Nyctibatrachus_cf_major_FB-2006</i> | - | 0 | 0 | 0 |
| <i>Nyctibatrachus_danieli</i>          | - | 0 | 0 | 0 |
| <i>Nyctibatrachus_dattatreyaensis</i>  | - | 0 | 0 | 0 |
| <i>Nyctibatrachus_deccanensis</i>      | - | 0 | 0 | 0 |
| <i>Nyctibatrachus_deveni</i>           | - | 0 | 0 | 0 |
| <i>Nyctibatrachus_gavi</i>             | - | 0 | 0 | 0 |
| <i>Nyctibatrachus_grandis</i>          | - | 0 | 0 | 0 |
| <i>Nyctibatrachus_humayuni</i>         | - | 0 | 0 | 0 |
| <i>Nyctibatrachus_indraneili</i>       | - | 0 | 0 | 0 |
| <i>Nyctibatrachus_jog</i>              | - | 0 | 0 | 0 |
| <i>Nyctibatrachus_karnatakaensis</i>   | - | 0 | 0 | 0 |
| <i>Nyctibatrachus_kempholeyensis</i>   | - | 0 | 0 | 0 |
| <i>Nyctibatrachus_major</i>            | - | 0 | 0 | 0 |
| <i>Nyctibatrachus_minimus</i>          | - | 0 | 0 | 0 |
| <i>Nyctibatrachus_minor</i>            | - | 0 | 0 | 0 |
| <i>Nyctibatrachus_periyar</i>          | - | 0 | 0 | 0 |
| <i>Nyctibatrachus_petraeus</i>         | - | 0 | 0 | 0 |
| <i>Nyctibatrachus_pillaii</i>          | - | 0 | 0 | 0 |
| <i>Nyctibatrachus_poocha</i>           | - | 0 | 0 | 0 |
| <i>Nyctibatrachus_sanctipalustris</i>  | - | 0 | 0 | 0 |
| <i>Nyctibatrachus_shiradi</i>          | - | 0 | 0 | 0 |
| <i>Nyctibatrachus_sp._A_IVB-2011</i>   | - | 0 | 0 | 0 |
| <i>Nyctibatrachus_sp._B_IVB-2011</i>   | - | 0 | 0 | 0 |
| <i>Nyctibatrachus_sp._VUB_0006</i>     | - | 0 | 0 | 0 |
| <i>Nyctibatrachus_sylvaticus</i>       | - | 0 | 0 | 0 |
| <i>Nyctibatrachus_vasanthi</i>         | - | 0 | 0 | 0 |
| <i>Nyctibatrachus_vrijeuni</i>         | - | 0 | 0 | 0 |
| <i>Nyctimantis_rugiceps</i>            | - | 0 | 0 | 0 |

|                                   |   |   |   |   |
|-----------------------------------|---|---|---|---|
| <i>Nyctimystes_cheesmani</i>      | - | 0 | 0 | 0 |
| <i>Nyctimystes_dayi</i>           | 0 | 0 | 0 | 0 |
| <i>Nyctimystes_foricula</i>       | - | 0 | 0 | 0 |
| <i>Nyctimystes_humeralis</i>      | - | 0 | 0 | 0 |
| <i>Nyctimystes_kubori</i>         | 0 | 0 | 0 | 0 |
| <i>Nyctimystes_narinosus</i>      | - | 0 | 0 | 0 |
| <i>Nyctimystes_papua</i>          | - | 0 | 0 | 0 |
| <i>Nyctimystes_pulcher</i>        | - | 0 | 0 | 0 |
| <i>Nyctimystes_semipalmatus</i>   | - | 0 | 0 | 0 |
| <i>Nyctimystes_zweifeli</i>       | - | 0 | 0 | 0 |
| <i>Nyctixalus_pictus</i>          | 1 | 0 | 0 | 0 |
| <i>Nyctixalus_spinosus</i>        | 1 | 0 | 0 | 0 |
| <i>Nymphargus_bejaranoi</i>       | - | 0 | 0 | 0 |
| <i>Nymphargus_cochranae</i>       | - | 0 | 0 | 0 |
| <i>Nymphargus_griffithsi</i>      | - | 0 | 0 | 0 |
| <i>Nymphargus_megacheirus</i>     | - | 0 | 0 | 0 |
| <i>Nymphargus_mixomaculatus</i>   | - | 0 | 0 | 0 |
| <i>Nymphargus_pluvialis</i>       | - | 0 | 0 | 0 |
| <i>Nymphargus_posadae</i>         | - | 0 | 0 | 0 |
| <i>Nymphargus_puyoensis</i>       | - | 0 | 0 | 0 |
| <i>Nymphargus_rosada</i>          | - | 0 | 0 | 0 |
| <i>Nymphargus_siren</i>           | - | 0 | 0 | 0 |
| <i>Nymphargus_wileyi</i>          | - | 0 | 0 | 0 |
| <i>Occidozyga_baluensis</i>       | - | 0 | 0 | 0 |
| <i>Occidozyga_laevis</i>          | 0 | 0 | 0 | 0 |
| <i>Occidozyga_lima</i>            | 0 | 0 | 0 | 0 |
| <i>Occidozyga_magnapustulosus</i> | - | 0 | 0 | 0 |
| <i>Occidozyga_martensii</i>       | - | 0 | 0 | 0 |
| <i>Odontophrynus_achalensis</i>   | - | 0 | 0 | 0 |
| <i>Odontophrynus_americanus</i>   | 0 | 0 | 0 | 0 |
| <i>Odontophrynus_carvalhoi</i>    | - | 0 | 0 | 0 |
| <i>Odontophrynus_cultripipes</i>  | 0 | 0 | 0 | 0 |
| <i>Odontophrynus_occidentalis</i> | - | 0 | 0 | 0 |
| <i>Odorrana_absita</i>            | - | 0 | 0 | 0 |
| <i>Odorrana_amamiensis</i>        | - | 0 | 0 | 0 |
| <i>Odorrana_andersonii</i>        | - | 0 | 0 | 0 |
| <i>Odorrana_aureola</i>           | - | 0 | 0 | 0 |
| <i>Odorrana_bacboensis</i>        | - | 0 | 0 | 0 |
| <i>Odorrana_banaorum</i>          | - | 0 | 0 | 0 |
| <i>Odorrana_chapaensis</i>        | 0 | 0 | 0 | 0 |
| <i>Odorrana_chloronota</i>        | - | 0 | 0 | 0 |
| <i>Odorrana_grahami</i>           | - | 0 | 0 | 0 |
| <i>Odorrana_hejiangensis</i>      | - | 0 | 0 | 0 |
| <i>Odorrana_hmongorum</i>         | - | 0 | 0 | 0 |

|                                 |   |   |   |   |
|---------------------------------|---|---|---|---|
| <i>Odorrana_hosii</i>           | - | 0 | 0 | 0 |
| <i>Odorrana_ishikawae</i>       | - | 0 | 0 | 0 |
| <i>Odorrana_jingdongensis</i>   | 0 | 0 | 0 | 0 |
| <i>Odorrana_junlianensis</i>    | 0 | 0 | 0 | 0 |
| <i>Odorrana_khalam</i>          | - | 0 | 0 | 0 |
| <i>Odorrana_livida</i>          | - | 0 | 0 | 0 |
| <i>Odorrana_margaretae</i>      | - | 0 | 0 | 0 |
| <i>Odorrana_morafkai</i>        | - | 0 | 0 | 0 |
| <i>Odorrana_narina</i>          | - | 0 | 0 | 0 |
| <i>Odorrana_nasica</i>          | - | 0 | 0 | 0 |
| <i>Odorrana_schmackeri</i>      | 0 | 0 | 0 | 0 |
| <i>Odorrana_supranarina</i>     | - | 0 | 0 | 0 |
| <i>Odorrana_swinhoana</i>       | - | 0 | 0 | 0 |
| <i>Odorrana_tiannanensis</i>    | - | 0 | 0 | 0 |
| <i>Odorrana_tormota</i>         | 0 | 0 | 0 | 0 |
| <i>Odorrana_utsunomiyaorum</i>  | - | 0 | 0 | 0 |
| <i>Odorrana_versabilis</i>      | - | 0 | 0 | 0 |
| <i>Oophaga_arborea</i>          | - | 0 | 0 | 0 |
| <i>Oophaga_granulifera</i>      | - | 0 | 0 | 0 |
| <i>Oophaga_histrionica</i>      | - | 0 | 0 | 0 |
| <i>Oophaga_lehmanni</i>         | - | 0 | 0 | 0 |
| <i>Oophaga_pumilio</i>          | - | 0 | 0 | 0 |
| <i>Oophaga_speciosa</i>         | - | 0 | 0 | 0 |
| <i>Oophaga_sylvatica</i>        | - | 0 | 0 | 0 |
| <i>Oophaga_vicentei</i>         | - | 0 | 0 | 0 |
| <i>Ophryophryne_hansi</i>       | 0 | 0 | 0 | 0 |
| <i>Ophryophryne_microstoma</i>  | - | 0 | 0 | 0 |
| <i>Opisthoxylax_immaculatus</i> | 1 | 0 | 0 | 0 |
| <i>Oreobates_choristolemma</i>  | - | 0 | 1 | 0 |
| <i>Oreobates_cruralis</i>       | - | 0 | 1 | 0 |
| <i>Oreobates_discoidalis</i>    | - | 0 | 1 | 0 |
| <i>Oreobates_granulosus</i>     | - | 0 | 1 | 0 |
| <i>Oreobates_heterodactylus</i> | - | 0 | 1 | 0 |
| <i>Oreobates_ibischi</i>        | - | 0 | 1 | 0 |
| <i>Oreobates_lehri</i>          | - | 0 | 1 | 0 |
| <i>Oreobates_madidi</i>         | - | 0 | 1 | 0 |
| <i>Oreobates_quixensis</i>      | 1 | 0 | 1 | 0 |
| <i>Oreobates_sanctaecrucis</i>  | - | 0 | 1 | 0 |
| <i>Oreobates_sanderi</i>        | - | 0 | 1 | 0 |
| <i>Oreobates_saxatilis</i>      | - | 0 | 1 | 0 |
| <i>Oreolalax_chuanbeiensis</i>  | 0 | 0 | 0 | 0 |
| <i>Oreolalax_jingdongensis</i>  | 0 | 0 | 0 | 0 |
| <i>Oreolalax_liangbeiensis</i>  | - | 0 | 0 | 0 |
| <i>Oreolalax_lichuanensis</i>   | 0 | 0 | 0 | 0 |

|                                    |   |   |   |   |
|------------------------------------|---|---|---|---|
| <i>Oreolalax_major</i>             | - | 0 | 0 | 0 |
| <i>Oreolalax_multipunctatus</i>    | - | 0 | 0 | 0 |
| <i>Oreolalax_nanjiangensis</i>     | - | 0 | 0 | 0 |
| <i>Oreolalax_omeimontis</i>        | - | 0 | 0 | 0 |
| <i>Oreolalax_pingii</i>            | 0 | 0 | 0 | 0 |
| <i>Oreolalax_popei</i>             | - | 0 | 0 | 0 |
| <i>Oreolalax_rhodostigmatus</i>    | - | 0 | 0 | 0 |
| <i>Oreolalax_rugosus</i>           | - | 0 | 0 | 0 |
| <i>Oreolalax_schmidti</i>          | - | 0 | 0 | 0 |
| <i>Oreolalax_xiangchengensis</i>   | - | 0 | 0 | 0 |
| <i>Oreophryne_asplenicola</i>      | - | 0 | 0 | 0 |
| <i>Oreophryne_atrigularis</i>      | - | 0 | 0 | 0 |
| <i>Oreophryne_brachypus</i>        | - | 0 | 0 | 0 |
| <i>Oreophryne_clamata</i>          | 1 | 0 | 0 | 0 |
| <i>Oreophryne_pseudasplenicola</i> | - | 0 | 0 | 0 |
| <i>Oreophryne_sibilans</i>         | - | 0 | 0 | 0 |
| <i>Oreophryne_unicolor</i>         | - | 0 | 0 | 0 |
| <i>Oreophryne_waira</i>            | - | 0 | 0 | 0 |
| <i>Oreophryne_wapoga</i>           | - | 0 | 0 | 0 |
| <i>Oreophrynella_sp._ROM_39649</i> | - | 0 | 0 | 0 |
| <i>Osornophryne_antisana</i>       | - | 0 | 0 | 0 |
| <i>Osornophryne_bufoniformis</i>   | - | 0 | 0 | 0 |
| <i>Osornophryne_guacamayo</i>      | 1 | 0 | 0 | 0 |
| <i>Osornophryne_puruanta</i>       | - | 0 | 0 | 0 |
| <i>Osornophryne_sumacoensis</i>    | - | 0 | 0 | 0 |
| <i>Osteocephalus_alboguttatus</i>  | - | 0 | 0 | 0 |
| <i>Osteocephalus_buckleyi</i>      | 0 | 0 | 0 | 0 |
| <i>Osteocephalus_cabrerae</i>      | - | 0 | 0 | 0 |
| <i>Osteocephalus_deridens</i>      | - | 0 | 0 | 0 |
| <i>Osteocephalus_exophthalmus</i>  | - | 0 | 0 | 0 |
| <i>Osteocephalus_leprieurii</i>    | 0 | 0 | 0 | 0 |
| <i>Osteocephalus_mutabor</i>       | - | 0 | 0 | 0 |
| <i>Osteocephalus_oophagus</i>      | 0 | 0 | 0 | 0 |
| <i>Osteocephalus_planiceps</i>     | - | 0 | 0 | 0 |
| <i>Osteocephalus_taurinus</i>      | 0 | 0 | 0 | 0 |
| <i>Osteocephalus_verruciger</i>    | - | 0 | 0 | 0 |
| <i>Osteopilus_brunneus</i>         | - | 0 | 0 | 0 |
| <i>Osteopilus_crucialis</i>        | - | 0 | 0 | 0 |
| <i>Osteopilus_dominicensis</i>     | - | 0 | 0 | 0 |
| <i>Osteopilus_mariana</i>          | - | 0 | 0 | 0 |
| <i>Osteopilus_pulchrrilineatus</i> | - | 0 | 0 | 0 |
| <i>Osteopilus_septentrionalis</i>  | 0 | 0 | 0 | 0 |
| <i>Osteopilus_vastus</i>           | - | 0 | 0 | 0 |
| <i>Osteopilus_wilderi</i>          | - | 0 | 0 | 0 |

|                                       |   |   |   |   |
|---------------------------------------|---|---|---|---|
| <i>Otophryne_pyburni</i>              | 1 | 0 | 0 | 0 |
| <i>Oxydactyla_crassa</i>              | 1 | 0 | 0 | 0 |
| <i>Pachymedusa_dacnicolor</i>         | - | 0 | 0 | 0 |
| <i>Paracrinia_haswelli</i>            | 0 | 0 | 0 | 0 |
| <i>Paradoxophyla_palmata</i>          | 0 | 0 | 0 | 0 |
| <i>Paradoxophyla_tiarano</i>          | - | 0 | 0 | 0 |
| <i>Paratelmatoebius_cardosoi</i>      | 0 | 0 | 0 | 0 |
| <i>Paratelmatoebius_gaigeae</i>       | - | 0 | 0 | 0 |
| <i>Paratelmatoebius_poecilogaster</i> | 0 | 0 | 0 | 0 |
| <i>Pedostibes_hosii</i>               | 0 | 0 | 0 | 0 |
| <i>Pedostibes_rugosus</i>             | - | 0 | 0 | 0 |
| <i>Pedostibes_tuberculosis</i>        | 0 | 0 | 0 | 0 |
| <i>Pelobates_cultripes</i>            | 0 | 0 | 0 | 0 |
| <i>Pelobates_fuscus</i>               | - | 0 | 0 | 0 |
| <i>Pelobates_syriacus</i>             | - | 0 | 0 | 0 |
| <i>Pelobates_varaldii</i>             | - | 0 | 0 | 0 |
| <i>Pelodytes_caucasicus</i>           | - | 0 | 0 | 0 |
| <i>Pelodytes_ibericus</i>             | - | 0 | 0 | 0 |
| <i>Pelodytes_punctatus</i>            | 0 | 0 | 0 | 0 |
| <i>Pelophryne_brevipes</i>            | 0 | 0 | 0 | 0 |
| <i>Pelophryne_misera</i>              | 0 | 0 | 0 | 0 |
| <i>Pelophryne_signata</i>             | - | 0 | 0 | 0 |
| <i>Pelophylax_bedriagae</i>           | - | 0 | 0 | 0 |
| <i>Pelophylax_bergeri</i>             | - | 0 | 0 | 0 |
| <i>Pelophylax_cerigensis</i>          | - | 0 | 0 | 0 |
| <i>Pelophylax_cretensis</i>           | - | 0 | 0 | 0 |
| <i>Pelophylax_epeiroticus</i>         | - | 0 | 0 | 0 |
| <i>Pelophylax_esculentus</i>          | - | 0 | 0 | 0 |
| <i>Pelophylax_fukienensis</i>         | - | 0 | 0 | 0 |
| <i>Pelophylax_hubeiensis</i>          | - | 0 | 0 | 0 |
| <i>Pelophylax_kurtmuelleri</i>        | - | 0 | 0 | 0 |
| <i>Pelophylax_lateralis</i>           | - | 0 | 0 | 0 |
| <i>Pelophylax_lessonae</i>            | - | 0 | 0 | 0 |
| <i>Pelophylax_nigromaculatus</i>      | - | 0 | 0 | 0 |
| <i>Pelophylax_perezi</i>              | - | 0 | 0 | 0 |
| <i>Pelophylax_plancyi</i>             | - | 0 | 0 | 0 |
| <i>Pelophylax_porosus</i>             | - | 0 | 0 | 0 |
| <i>Pelophylax_ridibundus</i>          | - | 0 | 0 | 0 |
| <i>Pelophylax_saharicus</i>           | - | 0 | 0 | 0 |
| <i>Pelophylax_shqipericus</i>         | - | 0 | 0 | 0 |
| <i>Peltophryne_cataulaciceps</i>      | - | 0 | 0 | 0 |
| <i>Peltophryne_empua</i>              | - | 0 | 0 | 0 |
| <i>Peltophryne_florentinoi</i>        | - | 0 | 0 | 0 |
| <i>Peltophryne_fustiger</i>           | - | 0 | 0 | 0 |



|                                    |   |   |   |   |
|------------------------------------|---|---|---|---|
| <i>Peltophryne guentheri</i>       | - | 0 | 0 | 0 |
| <i>Peltophryne gundlachi</i>       | - | 0 | 0 | 0 |
| <i>Peltophryne lemur</i>           | - | 0 | 0 | 0 |
| <i>Peltophryne longinasus</i>      | - | 0 | 0 | 0 |
| <i>Peltophryne peltocephalus</i>   | - | 0 | 0 | 0 |
| <i>Peltophryne taladai</i>         | - | 0 | 0 | 0 |
| <i>Petropedetes cameronensis</i>   | 1 | 0 | 0 | 0 |
| <i>Petropedetes martiensseni</i>   | 1 | 0 | 0 | 0 |
| <i>Petropedetes newtoni</i>        | - | 0 | 0 | 0 |
| <i>Petropedetes palmipes</i>       | - | 0 | 0 | 0 |
| <i>Petropedetes parkeri</i>        | 1 | 0 | 0 | 0 |
| <i>Petropedetes yakusini</i>       | - | 0 | 0 | 0 |
| <i>Phasmahyla cochranae</i>        | 1 | 0 | 0 | 0 |
| <i>Phasmahyla cruzi</i>            | - | 0 | 0 | 0 |
| <i>Phasmahyla exilis</i>           | - | 0 | 0 | 0 |
| <i>Phasmahyla guttata</i>          | 1 | 0 | 0 | 0 |
| <i>Phasmahyla jandaia</i>          | - | 0 | 0 | 0 |
| <i>Philautus abditus</i>           | - | 0 | 0 | 0 |
| <i>Philautus acutirostris</i>      | 1 | 0 | 0 | 0 |
| <i>Philautus aurifasciatus</i>     | - | 0 | 0 | 0 |
| <i>Philautus ingeri</i>            | - | 0 | 0 | 0 |
| <i>Philautus mjobergi</i>          | - | 0 | 0 | 0 |
| <i>Philautus ocellatus</i>         | - | 0 | 0 | 0 |
| <i>Philautus petersi</i>           | - | 0 | 0 | 0 |
| <i>Philautus sp. neelanethrus</i>  | - | 0 | 0 | 0 |
| <i>Philautus surdus</i>            | 1 | 0 | 0 | 0 |
| <i>Phyloria sphagnicolus</i>       | 1 | 0 | 0 | 0 |
| <i>Phlyctimantis leonardi</i>      | 0 | 0 | 0 | 0 |
| <i>Phlyctimantis verrucosus</i>    | - | 0 | 0 | 0 |
| <i>Phrynobatrachus acridoides</i>  | 0 | 0 | 0 | 0 |
| <i>Phrynobatrachus africanus</i>   | - | 0 | 0 | 0 |
| <i>Phrynobatrachus auritus</i>     | - | 0 | 0 | 0 |
| <i>Phrynobatrachus calcaratus</i>  | 0 | 0 | 0 | 0 |
| <i>Phrynobatrachus cricogaster</i> | - | 0 | 0 | 0 |
| <i>Phrynobatrachus dendrobates</i> | 1 | 0 | 0 | 0 |
| <i>Phrynobatrachus dispar</i>      | - | 0 | 0 | 0 |
| <i>Phrynobatrachus krefftii</i>    | - | 0 | 0 | 0 |
| <i>Phrynobatrachus leveleve</i>    | - | 0 | 0 | 0 |
| <i>Phrynobatrachus mababiensis</i> | 0 | 0 | 0 | 0 |
| <i>Phrynobatrachus natalensis</i>  | 0 | 0 | 0 | 0 |
| <i>Phrynobatrachus sandersoni</i>  | 1 | 0 | 0 | 0 |
| <i>Phrynobatrachus sp. MV-1999</i> | - | 0 | 0 | 0 |
| <i>Phrynoidis asper</i>            | - | 0 | 0 | 0 |
| <i>Phrynoidis juxtaspera</i>       | - | 0 | 0 | 0 |

|                                     |   |   |   |   |
|-------------------------------------|---|---|---|---|
| <i>Phrynomantis_annectens</i>       | - | 0 | 0 | 0 |
| <i>Phrynomantis_bifasciatus</i>     | - | 0 | 0 | 0 |
| <i>Phrynomantis_microps</i>         | 0 | 0 | 0 | 0 |
| <i>Phrynomedusa_marginata</i>       | - | 0 | 0 | 0 |
| <i>Phrynopus_barthlenae</i>         | - | 0 | 0 | 0 |
| <i>Phrynopus_bracki</i>             | 1 | 0 | 0 | 0 |
| <i>Phrynopus_bufoides</i>           | - | 0 | 0 | 0 |
| <i>Phrynopus_horstpauli</i>         | - | 0 | 0 | 0 |
| <i>Phrynopus_juinensis</i>          | - | 0 | 0 | 0 |
| <i>Phrynopus_kauneorum</i>          | - | 0 | 0 | 0 |
| <i>Phrynopus_pesantesi</i>          | - | 0 | 0 | 0 |
| <i>Phrynopus_tautzorom</i>          | - | 0 | 0 | 0 |
| <i>Phyllobates_aurotaenia</i>       | - | 0 | 0 | 0 |
| <i>Phyllobates_bicolor</i>          | - | 0 | 0 | 0 |
| <i>Phyllobates_lugubris</i>         | - | 0 | 0 | 0 |
| <i>Phyllobates_terribilis</i>       | 1 | 0 | 0 | 0 |
| <i>Phyllobates_vittatus</i>         | 1 | 0 | 0 | 0 |
| <i>Phyllodytes_auratus</i>          | - | 0 | 0 | 0 |
| <i>Phyllodytes_luteolus</i>         | 0 | 0 | 0 | 0 |
| <i>Phyllomedusa_araguari</i>        | - | 0 | 0 | 0 |
| <i>Phyllomedusa_atelopoides</i>     | 1 | 0 | 0 | 0 |
| <i>Phyllomedusa_ayeaye</i>          | - | 0 | 0 | 0 |
| <i>Phyllomedusa_azurea</i>          | 0 | 0 | 0 | 0 |
| <i>Phyllomedusa_bahiana</i>         | 0 | 0 | 0 | 0 |
| <i>Phyllomedusa_baltea</i>          | 0 | 0 | 0 | 0 |
| <i>Phyllomedusa_bicolor</i>         | 1 | 0 | 0 | 0 |
| <i>Phyllomedusa_boliviana</i>       | - | 0 | 0 | 0 |
| <i>Phyllomedusa_burmeisteri</i>     | - | 0 | 0 | 0 |
| <i>Phyllomedusa_camba</i>           | - | 0 | 0 | 0 |
| <i>Phyllomedusa_centralis</i>       | - | 0 | 0 | 0 |
| <i>Phyllomedusa_distincta</i>       | - | 0 | 0 | 0 |
| <i>Phyllomedusa_duellmani</i>       | - | 0 | 0 | 0 |
| <i>Phyllomedusa_hypochondrialis</i> | 1 | 0 | 0 | 0 |
| <i>Phyllomedusa_iheringii</i>       | - | 0 | 0 | 0 |
| <i>Phyllomedusa_itacolomi</i>       | - | 0 | 0 | 0 |
| <i>Phyllomedusa_megacephala</i>     | - | 0 | 0 | 0 |
| <i>Phyllomedusa_neildi</i>          | - | 0 | 0 | 0 |
| <i>Phyllomedusa_nordestina</i>      | - | 0 | 0 | 0 |
| <i>Phyllomedusa_oreades</i>         | - | 0 | 0 | 0 |
| <i>Phyllomedusa_palliata</i>        | 1 | 0 | 0 | 0 |
| <i>Phyllomedusa_perinesos</i>       | - | 0 | 0 | 0 |
| <i>Phyllomedusa_rohdei</i>          | - | 0 | 0 | 0 |
| <i>Phyllomedusa_sauvagii</i>        | - | 0 | 0 | 0 |
| <i>Phyllomedusa_tarsius</i>         | 1 | 0 | 0 | 0 |

|                                   |   |   |   |   |
|-----------------------------------|---|---|---|---|
| <i>Phyllomedusa_tetraploidea</i>  | - | 0 | 0 | 0 |
| <i>Phyllomedusa_tomopterna</i>    | 1 | 0 | 0 | 0 |
| <i>Phyllomedusa_trinitatis</i>    | - | 0 | 0 | 0 |
| <i>Phyllomedusa_vaillanti</i>     | 1 | 0 | 0 | 0 |
| <i>Physalaemus_albonotatus</i>    | - | 0 | 0 | 0 |
| <i>Physalaemus_barrio</i>         | - | 0 | 0 | 0 |
| <i>Physalaemus_biligonigerus</i>  | 1 | 0 | 0 | 0 |
| <i>Physalaemus_cuvieri</i>        | 1 | 0 | 0 | 0 |
| <i>Physalaemus_ephippifer</i>     | 1 | 0 | 0 | 0 |
| <i>Physalaemus_gracilis</i>       | - | 0 | 0 | 0 |
| <i>Physalaemus_riograndensis</i>  | - | 0 | 0 | 0 |
| <i>Physalaemus_signifer</i>       | - | 0 | 0 | 0 |
| <i>Phyzelaphryne_miriamae</i>     | 1 | 0 | 0 | 0 |
| <i>Pipa_carvalhoi</i>             | 0 | 0 | 0 | 0 |
| <i>Pipa_parva</i>                 | - | 0 | 0 | 0 |
| <i>Pipa_pipa</i>                  | 0 | 0 | 0 | 0 |
| <i>Platymantis_bimaculata</i>     | - | 0 | 0 | 0 |
| <i>Platymantis_corrugatus</i>     | - | 0 | 0 | 0 |
| <i>Platymantis_cryptotis</i>      | - | 0 | 0 | 0 |
| <i>Platymantis_dorsalis</i>       | 1 | 0 | 0 | 0 |
| <i>Platymantis_hazela</i>         | - | 0 | 0 | 0 |
| <i>Platymantis_mimula</i>         | - | 0 | 0 | 0 |
| <i>Platymantis_montanus</i>       | - | 0 | 0 | 0 |
| <i>Platymantis_naomii</i>         | - | 0 | 0 | 0 |
| <i>Platymantis_papuensis</i>      | 1 | 0 | 0 | 0 |
| <i>Platymantis_pelewensis</i>     | - | 0 | 0 | 0 |
| <i>Platymantis_punctata</i>       | - | 0 | 0 | 0 |
| <i>Platymantis_vitiensis</i>      | - | 0 | 0 | 0 |
| <i>Platymantis_weberi</i>         | - | 0 | 0 | 0 |
| <i>Platymantis_wuenscheorum</i>   | - | 0 | 0 | 0 |
| <i>Platypelis_barbouri</i>        | - | 0 | 0 | 0 |
| <i>Platypelis_grandis</i>         | 0 | 0 | 0 | 0 |
| <i>Platypelis_mavomavo</i>        | - | 0 | 0 | 0 |
| <i>Platypelis_milloti</i>         | - | 0 | 0 | 0 |
| <i>Platypelis_pollicaris</i>      | - | 0 | 0 | 0 |
| <i>Platypelis_tuberifera</i>      | - | 0 | 0 | 0 |
| <i>Plectrohyla_ameibothalame</i>  | - | 0 | 0 | 0 |
| <i>Plectrohyla_arborescandens</i> | - | 0 | 0 | 0 |
| <i>Plectrohyla_bistincta</i>      | 0 | 0 | 0 | 0 |
| <i>Plectrohyla_calthula</i>       | - | 0 | 0 | 0 |
| <i>Plectrohyla_chrysopleura</i>   | - | 0 | 0 | 0 |
| <i>Plectrohyla_cyclada</i>        | - | 0 | 0 | 0 |
| <i>Plectrohyla_glandulosa</i>     | - | 0 | 0 | 0 |
| <i>Plectrohyla_guatemalensis</i>  | - | 0 | 0 | 0 |

|                                                     |   |   |   |   |
|-----------------------------------------------------|---|---|---|---|
| <i>Plectrohyla_matudai</i>                          | - | 0 | 0 | 0 |
| <i>Plectrohyla_pentheter</i>                        | - | 0 | 0 | 0 |
| <i>Plectrohyla_siopela</i>                          | - | 0 | 0 | 0 |
| <i>Plethodontohyla_bipunctata</i>                   | - | 0 | 0 | 0 |
| <i>Plethodontohyla_brevipes</i>                     | - | 0 | 0 | 0 |
| <i>Plethodontohyla_fonetana</i>                     | - | 0 | 0 | 0 |
| <i>Plethodontohyla_guentheri</i>                    | - | 0 | 0 | 0 |
| <i>Plethodontohyla_inguinalis</i>                   | - | 0 | 0 | 0 |
| <i>Plethodontohyla_mihanika</i>                     | 0 | 0 | 0 | 0 |
| <i>Plethodontohyla_notosticta</i>                   | 0 | 0 | 0 | 0 |
| <i>Plethodontohyla_ocellata</i>                     | - | 0 | 0 | 0 |
| <i>Plethodontohyla_tuberata</i>                     | 1 | 0 | 0 | 0 |
| <i>Pleurodema_bibroni</i>                           | - | 0 | 0 | 0 |
| <i>Pleurodema_brachyops</i>                         | 1 | 0 | 0 | 0 |
| <i>Pleurodema_bufoninum</i>                         | - | 0 | 0 | 0 |
| <i>Pleurodema_marmoratum</i>                        | - | 0 | 0 | 0 |
| <i>Pleurodema_thaul</i>                             | - | 0 | 0 | 0 |
| <i>Polypedates_colletti</i>                         | - | 0 | 0 | 0 |
| <i>Polypedates_cruciger</i>                         | 1 | 0 | 0 | 0 |
| <i>Polypedates_eques</i>                            | - | 0 | 0 | 0 |
| <i>Polypedates_fastigo</i>                          | - | 0 | 0 | 0 |
| <i>Polypedates_leucomystax</i>                      | 1 | 0 | 0 | 0 |
| <i>Polypedates_maculatus</i>                        | 1 | 0 | 0 | 0 |
| <i>Polypedates_megacephalus</i>                     | 1 | 0 | 0 | 0 |
| <i>Polypedates_mutus</i>                            | - | 0 | 0 | 0 |
| <i>Poyntonia_paludicola</i>                         | 0 | 0 | 0 | 0 |
| <i>Poyntonophrynus_damaranus</i>                    | - | 0 | 0 | 0 |
| <i>Poyntonophrynus_dombensis</i>                    | - | 0 | 0 | 0 |
| <i>Poyntonophrynus_fenoulheti</i>                   | - | 0 | 0 | 0 |
| <i>Poyntonophrynus_vertebralis</i>                  | - | 0 | 0 | 0 |
| <i>Pristimantis_acerus</i>                          | 1 | 0 | 0 | 0 |
| <i>Pristimantis_achatinus</i>                       | - | 0 | 0 | 0 |
| <i>Pristimantis_actites</i>                         | - | 0 | 0 | 0 |
| <i>Pristimantis_acuminatus</i>                      | 1 | 0 | 0 | 0 |
| <i>Pristimantis_aff._altamazonicus_BOLD AAB3748</i> | - | 0 | 0 | 0 |
| <i>Pristimantis_aff._taeniatus_1_AJC-2011</i>       | - | 0 | 0 | 0 |
| <i>Pristimantis_aff._taeniatus_3_AJC-2011</i>       | - | 0 | 0 | 0 |
| <i>Pristimantis_affinis</i>                         | - | 0 | 0 | 0 |
| <i>Pristimantis_altae</i>                           | - | 0 | 0 | 0 |
| <i>Pristimantis_altamazonicus</i>                   | 1 | 0 | 0 | 0 |
| <i>Pristimantis_aniptopalmatus</i>                  | - | 0 | 0 | 0 |
| <i>Pristimantis_appendiculatus</i>                  | - | 0 | 0 | 0 |
| <i>Pristimantis_ardalonychus</i>                    | - | 0 | 0 | 0 |
| <i>Pristimantis_bipunctatus</i>                     | - | 0 | 0 | 0 |

|                                         |   |   |   |   |
|-----------------------------------------|---|---|---|---|
| <i>Pristimantis_bogotensis</i>          | - | 0 | 0 | 0 |
| <i>Pristimantis_brevifrons</i>          | - | 0 | 0 | 0 |
| <i>Pristimantis_bromeliaceus</i>        | - | 0 | 0 | 0 |
| <i>Pristimantis_buccinator</i>          | - | 0 | 0 | 0 |
| <i>Pristimantis_buckleyi</i>            | - | 0 | 0 | 0 |
| <i>Pristimantis_cajamarcensis</i>       | - | 0 | 0 | 0 |
| <i>Pristimantis_calcarulatus</i>        | - | 0 | 0 | 0 |
| <i>Pristimantis_caprifer</i>            | - | 0 | 0 | 0 |
| <i>Pristimantis_caryophyllaceus</i>     | - | 0 | 0 | 0 |
| <i>Pristimantis_celator</i>             | - | 0 | 0 | 0 |
| <i>Pristimantis_cerasinus</i>           | - | 0 | 0 | 0 |
| <i>Pristimantis_ceuthospilus</i>        | - | 0 | 0 | 0 |
| <i>Pristimantis_cf._mendax_SBH-2008</i> | - | 0 | 0 | 0 |
| <i>Pristimantis_cf._toftae_AJC-2011</i> | - | 0 | 0 | 0 |
| <i>Pristimantis_chalceus</i>            | - | 0 | 0 | 0 |
| <i>Pristimantis_chiastonotus</i>        | - | 0 | 0 | 0 |
| <i>Pristimantis_chloronotus</i>         | - | 0 | 0 | 0 |
| <i>Pristimantis_citriogaster</i>        | - | 0 | 0 | 0 |
| <i>Pristimantis_colomai</i>             | - | 0 | 0 | 0 |
| <i>Pristimantis_condor</i>              | 1 | 0 | 0 | 0 |
| <i>Pristimantis_conspicillatus</i>      | 1 | 0 | 0 | 0 |
| <i>Pristimantis_cremnobates</i>         | 1 | 0 | 0 | 0 |
| <i>Pristimantis_crenunguis</i>          | - | 0 | 0 | 0 |
| <i>Pristimantis_croceoinguinis</i>      | - | 0 | 0 | 0 |
| <i>Pristimantis_crucifer</i>            | - | 0 | 0 | 0 |
| <i>Pristimantis_cruentus</i>            | - | 0 | 0 | 0 |
| <i>Pristimantis_cryophilus</i>          | - | 0 | 0 | 0 |
| <i>Pristimantis_curtipes</i>            | 1 | 0 | 0 | 0 |
| <i>Pristimantis_danae</i>               | - | 0 | 0 | 0 |
| <i>Pristimantis_devillei</i>            | - | 0 | 0 | 0 |
| <i>Pristimantis_diadematus</i>          | 1 | 0 | 0 | 0 |
| <i>Pristimantis_dissimulatus</i>        | - | 0 | 0 | 0 |
| <i>Pristimantis_duellmani</i>           | 1 | 0 | 0 | 0 |
| <i>Pristimantis_eriphus</i>             | - | 0 | 0 | 0 |
| <i>Pristimantis_erythropleura</i>       | - | 0 | 0 | 0 |
| <i>Pristimantis_euphronides</i>         | 1 | 0 | 0 | 0 |
| <i>Pristimantis_fenestratus</i>         | - | 0 | 0 | 0 |
| <i>Pristimantis_frater</i>              | - | 0 | 0 | 0 |
| <i>Pristimantis_gaigei</i>              | - | 0 | 0 | 0 |
| <i>Pristimantis_galdi</i>               | - | 0 | 0 | 0 |
| <i>Pristimantis_gentryi</i>             | - | 0 | 0 | 0 |
| <i>Pristimantis_glandulosus</i>         | - | 0 | 0 | 0 |
| <i>Pristimantis_imitatrix</i>           | - | 0 | 0 | 0 |
| <i>Pristimantis_inguinalis</i>          | - | 0 | 0 | 0 |

|                                    |   |   |   |   |
|------------------------------------|---|---|---|---|
| <i>Pristimantis_inusitatus</i>     | - | 0 | 0 | 0 |
| <i>Pristimantis_koehleri</i>       | - | 0 | 0 | 0 |
| <i>Pristimantis_labiosus</i>       | - | 0 | 0 | 0 |
| <i>Pristimantis_lanthanites</i>    | 1 | 0 | 0 | 0 |
| <i>Pristimantis_latidiscus</i>     | - | 0 | 0 | 0 |
| <i>Pristimantis_leoni</i>          | 1 | 0 | 0 | 0 |
| <i>Pristimantis_librarius</i>      | - | 0 | 0 | 0 |
| <i>Pristimantis_lirellus</i>       | - | 0 | 0 | 0 |
| <i>Pristimantis_llojsintuta</i>    | - | 0 | 0 | 0 |
| <i>Pristimantis_luteolateralis</i> | - | 0 | 0 | 0 |
| <i>Pristimantis_lymani</i>         | - | 0 | 0 | 0 |
| <i>Pristimantis_malkini</i>        | - | 0 | 0 | 0 |
| <i>Pristimantis_marmoratus</i>     | - | 0 | 0 | 0 |
| <i>Pristimantis_martiae</i>        | - | 0 | 0 | 0 |
| <i>Pristimantis_melanogaster</i>   | - | 0 | 0 | 0 |
| <i>Pristimantis_miyatai</i>        | - | 0 | 0 | 0 |
| <i>Pristimantis_moro</i>           | - | 0 | 0 | 0 |
| <i>Pristimantis_museosus</i>       | - | 0 | 0 | 0 |
| <i>Pristimantis_nervicus</i>       | - | 0 | 0 | 0 |
| <i>Pristimantis_nyctophylax</i>    | 1 | 0 | 0 | 0 |
| <i>Pristimantis_ockendeni</i>      | 1 | 0 | 0 | 0 |
| <i>Pristimantis_ocreatus</i>       | - | 0 | 0 | 0 |
| <i>Pristimantis_orcesi</i>         | - | 0 | 0 | 0 |
| <i>Pristimantis_orestes</i>        | - | 0 | 0 | 0 |
| <i>Pristimantis_paisa</i>          | - | 0 | 0 | 0 |
| <i>Pristimantis_pardalis</i>       | - | 0 | 0 | 0 |
| <i>Pristimantis_parvillus</i>      | - | 0 | 0 | 0 |
| <i>Pristimantis_peruvianus</i>     | 1 | 0 | 0 | 0 |
| <i>Pristimantis_petrobardus</i>    | - | 0 | 0 | 0 |
| <i>Pristimantis_phoxocephalus</i>  | - | 0 | 0 | 0 |
| <i>Pristimantis_pirrensis</i>      | - | 0 | 0 | 0 |
| <i>Pristimantis_platydactylus</i>  | - | 0 | 0 | 0 |
| <i>Pristimantis_prolatus</i>       | - | 0 | 0 | 0 |
| <i>Pristimantis_ptochus</i>        | - | 0 | 0 | 0 |
| <i>Pristimantis_pulvinatus</i>     | - | 0 | 0 | 0 |
| <i>Pristimantis_pycnodermis</i>    | - | 0 | 0 | 0 |
| <i>Pristimantis_pyrrhomerus</i>    | - | 0 | 0 | 0 |
| <i>Pristimantis_quaquaversus</i>   | - | 0 | 0 | 0 |
| <i>Pristimantis_quinquagesimus</i> | - | 0 | 0 | 0 |
| <i>Pristimantis_reichlei</i>       | - | 0 | 0 | 0 |
| <i>Pristimantis_rhabdocnemus</i>   | - | 0 | 0 | 0 |
| <i>Pristimantis_rhabdolaemus</i>   | - | 0 | 0 | 0 |
| <i>Pristimantis_rhodoplichus</i>   | - | 0 | 0 | 0 |
| <i>Pristimantis_ridens</i>         | - | 0 | 0 | 0 |

|                                       |   |   |   |   |
|---------------------------------------|---|---|---|---|
| <i>Pristimantis_riveti</i>            | - | 0 | 0 | 0 |
| <i>Pristimantis_rozei</i>             | - | 0 | 0 | 0 |
| <i>Pristimantis_sagittulus</i>        | - | 0 | 0 | 0 |
| <i>Pristimantis_samaipatae</i>        | - | 0 | 0 | 0 |
| <i>Pristimantis_savagei</i>           | - | 0 | 0 | 0 |
| <i>Pristimantis_schulzei</i>          | - | 0 | 0 | 0 |
| <i>Pristimantis_shrevei</i>           | - | 0 | 0 | 0 |
| <i>Pristimantis_simonbolivari</i>     | - | 0 | 0 | 0 |
| <i>Pristimantis_simonsii</i>          | - | 0 | 0 | 0 |
| <i>Pristimantis_skydmainos</i>        | - | 0 | 0 | 0 |
| <i>Pristimantis_sp._SBH-2008</i>      | - | 0 | 0 | 0 |
| <i>Pristimantis_spinusus</i>          | - | 0 | 0 | 0 |
| <i>Pristimantis_stictogaster</i>      | - | 0 | 0 | 0 |
| <i>Pristimantis_subsigillatus</i>     | - | 0 | 0 | 0 |
| <i>Pristimantis_suetus</i>            | - | 0 | 0 | 0 |
| <i>Pristimantis_supernatis</i>        | - | 0 | 0 | 0 |
| <i>Pristimantis_surdus</i>            | - | 0 | 0 | 0 |
| <i>Pristimantis_taeniatus</i>         | - | 0 | 0 | 0 |
| <i>Pristimantis_terraebolivaris</i>   | - | 0 | 0 | 0 |
| <i>Pristimantis_thymalopsoides</i>    | - | 0 | 0 | 0 |
| <i>Pristimantis_thymelensis</i>       | - | 0 | 0 | 0 |
| <i>Pristimantis_toftae</i>            | - | 0 | 0 | 0 |
| <i>Pristimantis_truebae</i>           | - | 0 | 0 | 0 |
| <i>Pristimantis_unistrigatus</i>      | 1 | 0 | 0 | 0 |
| <i>Pristimantis_urichi</i>            | - | 0 | 0 | 0 |
| <i>Pristimantis_verecundus</i>        | - | 0 | 0 | 0 |
| <i>Pristimantis_versicolor</i>        | 1 | 0 | 0 | 0 |
| <i>Pristimantis vertebralis</i>       | - | 0 | 0 | 0 |
| <i>Pristimantis_viejas</i>            | - | 0 | 0 | 0 |
| <i>Pristimantis_w-nigrum</i>          | - | 0 | 0 | 0 |
| <i>Pristimantis_walkerii</i>          | 1 | 0 | 0 | 0 |
| <i>Pristimantis_wiensi</i>            | - | 0 | 0 | 0 |
| <i>Pristimantis_zeuctotylus</i>       | - | 0 | 0 | 0 |
| <i>Pristimantis_zophus</i>            | - | 0 | 0 | 0 |
| <i>Probreviceps_durirostris</i>       | - | 0 | 0 | 0 |
| <i>Probreviceps_macrodactylus</i>     | 1 | 0 | 0 | 0 |
| <i>Probreviceps_uluguruensis</i>      | 1 | 0 | 0 | 0 |
| <i>Proceratophrys_appendiculata</i>   | - | 0 | 0 | 0 |
| <i>Proceratophrys_avelinoi</i>        | - | 0 | 0 | 0 |
| <i>Proceratophrys_bigibbosa</i>       | - | 0 | 0 | 0 |
| <i>Proceratophrys_boiei</i>           | 0 | 0 | 0 | 0 |
| <i>Proceratophrys_concavitympanum</i> | - | 0 | 0 | 0 |
| <i>Proceratophrys_cristiceps</i>      | - | 0 | 0 | 0 |
| <i>Proceratophrys_cururu</i>          | - | 0 | 0 | 0 |

|                                             |   |   |   |   |
|---------------------------------------------|---|---|---|---|
| <i>Proceratophrys_goyana</i>                | - | 0 | 0 | 0 |
| <i>Proceratophrys_laticeps</i>              | - | 0 | 0 | 0 |
| <i>Proceratophrys_melanopogon</i>           | - | 0 | 0 | 0 |
| <i>Proceratophrys_moratoi</i>               | - | 0 | 0 | 0 |
| <i>Proceratophrys_renalis</i>               | - | 0 | 0 | 0 |
| <i>Proceratophrys_schirchi</i>              | - | 0 | 0 | 0 |
| <i>Pseudacris_brachyphona</i>               | 0 | 0 | 0 | 0 |
| <i>Pseudacris_brimleyi</i>                  | - | 0 | 0 | 0 |
| <i>Pseudacris_cadaverina</i>                | - | 0 | 0 | 0 |
| <i>Pseudacris_clarkii</i>                   | - | 0 | 0 | 0 |
| <i>Pseudacris_crucifer</i>                  | 0 | 0 | 0 | 0 |
| <i>Pseudacris_feriarum</i>                  | - | 0 | 0 | 0 |
| <i>Pseudacris_illinoensis</i>               | - | 0 | 0 | 0 |
| <i>Pseudacris_kalmi</i>                     | - | 0 | 0 | 0 |
| <i>Pseudacris_maculata</i>                  | - | 0 | 0 | 0 |
| <i>Pseudacris_nigrita</i>                   | 0 | 0 | 0 | 0 |
| <i>Pseudacris_ocularis</i>                  | 0 | 0 | 0 | 0 |
| <i>Pseudacris_ornata</i>                    | - | 0 | 0 | 0 |
| <i>Pseudacris_regilla</i>                   | 0 | 0 | 0 | 0 |
| <i>Pseudacris_streckeri</i>                 | 0 | 0 | 0 | 0 |
| <i>Pseudacris_triseriata</i>                | - | 0 | 0 | 0 |
| <i>Pseudepidalea_balearica</i>              | - | 0 | 0 | 0 |
| <i>Pseudepidalea_boulengeri</i>             | - | 0 | 0 | 0 |
| <i>Pseudepidalea_brongersmai</i>            | - | 0 | 0 | 0 |
| <i>Pseudepidalea_cf_luristanica_FB-2010</i> | - | 0 | 0 | 0 |
| <i>Pseudepidalea_cf_oblonga_FB-2010</i>     | - | 0 | 0 | 0 |
| <i>Pseudepidalea_cf_pewzowi_FB-2009</i>     | - | 0 | 0 | 0 |
| <i>Pseudepidalea_cf_variabilis_FB-2009</i>  | - | 0 | 0 | 0 |
| <i>Pseudepidalea_oblonga</i>                | - | 0 | 0 | 0 |
| <i>Pseudepidalea_pewzowi</i>                | - | 0 | 0 | 0 |
| <i>Pseudepidalea_raddei</i>                 | - | 0 | 0 | 0 |
| <i>Pseudepidalea_sicula</i>                 | - | 0 | 0 | 0 |
| <i>Pseudepidalea_variabilis</i>             | - | 0 | 0 | 0 |
| <i>Pseudepidalea_viridis</i>                | - | 0 | 0 | 0 |
| <i>Pseudis_bolbodactyla</i>                 | - | 0 | 0 | 0 |
| <i>Pseudis_caraya</i>                       | - | 0 | 0 | 0 |
| <i>Pseudis_cardosoi</i>                     | - | 0 | 0 | 0 |
| <i>Pseudis_fusca</i>                        | - | 0 | 0 | 0 |
| <i>Pseudis_laevis</i>                       | 1 | 0 | 0 | 0 |
| <i>Pseudis_limellum</i>                     | 1 | 0 | 0 | 0 |
| <i>Pseudis_minuta</i>                       | 1 | 0 | 0 | 0 |
| <i>Pseudis_paradoxa</i>                     | 1 | 0 | 0 | 0 |
| <i>Pseudis_tocantins</i>                    | - | 0 | 0 | 0 |
| <i>Pseudocallulops_eurydactylus</i>         | - | 0 | 0 | 0 |



|                                       |   |   |   |   |
|---------------------------------------|---|---|---|---|
| <i>Pseudocallulops_pullifer</i>       | - | 0 | 0 | 0 |
| <i>Pseudopaludicola_falcipes</i>      | 0 | 0 | 0 | 0 |
| <i>Pseudophilautus_asankai</i>        | - | 0 | 0 | 0 |
| <i>Pseudophilautus_cavirostris</i>    | - | 0 | 0 | 0 |
| <i>Pseudophilautus_decoris</i>        | - | 0 | 0 | 0 |
| <i>Pseudophilautus_femoralis</i>      | - | 0 | 0 | 0 |
| <i>Pseudophilautus_hoffmani</i>       | - | 0 | 0 | 0 |
| <i>Pseudophilautus_leucorhinus</i>    | - | 0 | 0 | 0 |
| <i>Pseudophilautus_lunatus</i>        | - | 0 | 0 | 0 |
| <i>Pseudophilautus_microtyimpanum</i> | - | 0 | 0 | 0 |
| <i>Pseudophilautus_mittermeieri</i>   | - | 0 | 0 | 0 |
| <i>Pseudophilautus_mooreorum</i>      | - | 0 | 0 | 0 |
| <i>Pseudophilautus_ocularis</i>       | - | 0 | 0 | 0 |
| <i>Pseudophilautus_papillosus</i>     | - | 0 | 0 | 0 |
| <i>Pseudophilautus_pleurotaenia</i>   | - | 0 | 0 | 0 |
| <i>Pseudophilautus_poppiae</i>        | - | 0 | 0 | 0 |
| <i>Pseudophilautus_popularis</i>      | - | 0 | 0 | 0 |
| <i>Pseudophilautus_schmarda</i>       | - | 0 | 0 | 0 |
| <i>Pseudophilautus_simba</i>          | - | 0 | 0 | 0 |
| <i>Pseudophilautus_steineri</i>       | - | 0 | 0 | 0 |
| <i>Pseudophilautus_stuarti</i>        | - | 0 | 0 | 0 |
| <i>Pseudophilautus_tanu</i>           | - | 0 | 0 | 0 |
| <i>Pseudophilautus_wynaadensis</i>    | - | 0 | 0 | 0 |
| <i>Pseudophilautus_zorro</i>          | - | 0 | 0 | 0 |
| <i>Pseudophryne_bibroni</i>           | - | 0 | 0 | 0 |
| <i>Pseudophryne_coriacea</i>          | 1 | 0 | 0 | 0 |
| <i>Psychrophrynella_iatamasi</i>      | 0 | 0 | 0 | 0 |
| <i>Psychrophrynella_wettsteini</i>    | 1 | 0 | 0 | 0 |
| <i>Ptychadena_aequiplicata</i>        | - | 0 | 0 | 0 |
| <i>Ptychadena_anchietae</i>           | 0 | 0 | 0 | 0 |
| <i>Ptychadena_bibroni</i>             | 0 | 0 | 0 | 0 |
| <i>Ptychadena_cooperi</i>             | - | 0 | 0 | 0 |
| <i>Ptychadena_longirostris</i>        | - | 0 | 0 | 0 |
| <i>Ptychadena_mahnerti</i>            | - | 0 | 0 | 0 |
| <i>Ptychadena_mascareniensis</i>      | - | 0 | 0 | 0 |
| <i>Ptychadena_newtoni</i>             | - | 0 | 0 | 0 |
| <i>Ptychadena_oxyrhynchus</i>         | - | 0 | 0 | 0 |
| <i>Ptychadena_porosissima</i>         | 0 | 0 | 0 | 0 |
| <i>Ptychadena_pumilio</i>             | - | 0 | 0 | 0 |
| <i>Ptychadena_schubotzi</i>           | - | 0 | 0 | 0 |
| <i>Ptychadena_subpunctata</i>         | - | 0 | 0 | 0 |
| <i>Ptychadena_taenioscelis</i>        | - | 0 | 0 | 0 |
| <i>Ptychohyla_dendrophasma</i>        | - | 0 | 0 | 0 |
| <i>Ptychohyla_euthysanota</i>         | - | 0 | 0 | 0 |

|                                     |   |   |   |   |
|-------------------------------------|---|---|---|---|
| <i>Ptychohyla_hypomykter</i>        | 0 | 0 | 0 | 0 |
| <i>Ptychohyla_leonhardschultzei</i> | - | 0 | 0 | 0 |
| <i>Ptychohyla_salvadorensis</i>     | - | 0 | 0 | 0 |
| <i>Ptychohyla_spinipollex</i>       | - | 0 | 0 | 0 |
| <i>Ptychohyla_zophodes</i>          | - | 0 | 0 | 0 |
| <i>Pyxicephalus_adpersus</i>        | 0 | 0 | 0 | 0 |
| <i>Pyxicephalus_edulis</i>          | 0 | 0 | 0 | 0 |
| <i>Quasipaa_boulengeri</i>          | - | 0 | 0 | 0 |
| <i>Quasipaa_exilispinosa</i>        | - | 0 | 0 | 0 |
| <i>Quasipaa_fasciculispina</i>      | - | 0 | 0 | 0 |
| <i>Quasipaa_jiulongensis</i>        | - | 0 | 0 | 0 |
| <i>Quasipaa_robertingeri</i>        | - | 0 | 0 | 0 |
| <i>Quasipaa_shini</i>               | - | 0 | 0 | 0 |
| <i>Quasipaa_spinosa</i>             | - | 0 | 0 | 0 |
| <i>Quasipaa_verrucospinosa</i>      | - | 0 | 0 | 0 |
| <i>Quasipaa_yei</i>                 | - | 0 | 0 | 0 |
| <i>Ramanella_obscura</i>            | 0 | 0 | 0 | 0 |
| <i>Ramanella_variegata</i>          | 0 | 0 | 0 | 0 |
| <i>Rana_amurensis</i>               | 0 | 0 | 0 | 0 |
| <i>Rana_areolata</i>                | - | 0 | 0 | 0 |
| <i>Rana_arvalis</i>                 | 0 | 0 | 0 | 0 |
| <i>Rana_asiatica</i>                | 0 | 0 | 0 | 0 |
| <i>Rana_aurora</i>                  | 0 | 0 | 0 | 0 |
| <i>Rana_berlandieri</i>             | 0 | 0 | 0 | 0 |
| <i>Rana_blairi</i>                  | - | 0 | 0 | 0 |
| <i>Rana_boylii</i>                  | 0 | 0 | 0 | 0 |
| <i>Rana_brownorum</i>               | - | 0 | 0 | 0 |
| <i>Rana_bwana</i>                   | - | 0 | 0 | 0 |
| <i>Rana_capito</i>                  | 0 | 0 | 0 | 0 |
| <i>Rana_cascadae</i>                | 0 | 0 | 0 | 0 |
| <i>Rana_catesbeiana</i>             | 0 | 0 | 0 | 0 |
| <i>Rana_chaochiaoensis</i>          | - | 0 | 0 | 0 |
| <i>Rana_chensinensis</i>            | 0 | 0 | 0 | 0 |
| <i>Rana_chiricahuensis</i>          | 0 | 0 | 0 | 0 |
| <i>Rana_clamitans</i>               | 0 | 0 | 0 | 0 |
| <i>Rana_dalmatina</i>               | 0 | 0 | 0 | 0 |
| <i>Rana_dunni</i>                   | - | 0 | 0 | 0 |
| <i>Rana_dybowskii</i>               | 0 | 0 | 0 | 0 |
| <i>Rana_forreri</i>                 | 0 | 0 | 0 | 0 |
| <i>Rana_graeca</i>                  | 0 | 0 | 0 | 0 |
| <i>Rana_grylio</i>                  | 0 | 0 | 0 | 0 |
| <i>Rana_heckscheri</i>              | 0 | 0 | 0 | 0 |
| <i>Rana_huanrensis</i>              | - | 0 | 0 | 0 |
| <i>Rana_iberica</i>                 | 0 | 0 | 0 | 0 |

|                             |   |   |   |   |
|-----------------------------|---|---|---|---|
| <i>Rana_italica</i>         | - | 0 | 0 | 0 |
| <i>Rana_japonica</i>        | 0 | 0 | 0 | 0 |
| <i>Rana_johnsi</i>          | - | 0 | 0 | 0 |
| <i>Rana_juliani</i>         | - | 0 | 0 | 0 |
| <i>Rana_kukunoris</i>       | - | 0 | 0 | 0 |
| <i>Rana_kunyuensis</i>      | - | 0 | 0 | 0 |
| <i>Rana_latastei</i>        | - | 0 | 0 | 0 |
| <i>Rana_longicrus</i>       | 0 | 0 | 0 | 0 |
| <i>Rana_luteiventris</i>    | 0 | 0 | 0 | 0 |
| <i>Rana_macrocnemis</i>     | 0 | 0 | 0 | 0 |
| <i>Rana_macroglossa</i>     | - | 0 | 0 | 0 |
| <i>Rana_maculata</i>        | - | 0 | 0 | 0 |
| <i>Rana_magnaocularis</i>   | - | 0 | 0 | 0 |
| <i>Rana_megatympnum</i>     | - | 0 | 0 | 0 |
| <i>Rana_montezumae</i>      | 0 | 0 | 0 | 0 |
| <i>Rana_muscosa</i>         | 0 | 0 | 0 | 0 |
| <i>Rana_neovolcanica</i>    | - | 0 | 0 | 0 |
| <i>Rana_okaloosae</i>       | - | 0 | 0 | 0 |
| <i>Rana_omeimontis</i>      | - | 0 | 0 | 0 |
| <i>Rana_omitemana</i>       | - | 0 | 0 | 0 |
| <i>Rana_onca</i>            | - | 0 | 0 | 0 |
| <i>Rana_ornativentris</i>   | 0 | 0 | 0 | 0 |
| <i>Rana_palmipes</i>        | 0 | 0 | 0 | 0 |
| <i>Rana_palustris</i>       | 0 | 0 | 0 | 0 |
| <i>Rana_pipiens</i>         | 0 | 0 | 0 | 0 |
| <i>Rana_pirica</i>          | 0 | 0 | 0 | 0 |
| <i>Rana_pretiosa</i>        | 0 | 0 | 0 | 0 |
| <i>Rana_psilonota</i>       | - | 0 | 0 | 0 |
| <i>Rana_pustulosa</i>       | - | 0 | 0 | 0 |
| <i>Rana_pyrenaica</i>       | 0 | 0 | 0 | 0 |
| <i>Rana_sauteri</i>         | - | 0 | 0 | 0 |
| <i>Rana_septentrionalis</i> | - | 0 | 0 | 0 |
| <i>Rana_sevosa</i>          | - | 0 | 0 | 0 |
| <i>Rana_shuchinae</i>       | - | 0 | 0 | 0 |
| <i>Rana_sierramadrensis</i> | - | 0 | 0 | 0 |
| <i>Rana_spectabilis</i>     | - | 0 | 0 | 0 |
| <i>Rana_sphenocephala</i>   | 0 | 0 | 0 | 0 |
| <i>Rana_sylvatica</i>       | 0 | 0 | 0 | 0 |
| <i>Rana_tagoi</i>           | 0 | 0 | 0 | 0 |
| <i>Rana_tarahumarae</i>     | 0 | 0 | 0 | 0 |
| <i>Rana_taylori</i>         | - | 0 | 0 | 0 |
| <i>Rana_temporaria</i>      | 0 | 0 | 0 | 0 |
| <i>Rana_tlaloci</i>         | - | 0 | 0 | 0 |
| <i>Rana_tsushimensis</i>    | - | 0 | 0 | 0 |

|                                   |   |   |   |   |
|-----------------------------------|---|---|---|---|
| <i>Rana_vaillanti</i>             | 0 | 0 | 0 | 0 |
| <i>Rana_vibicaria</i>             | - | 0 | 0 | 0 |
| <i>Rana_virgatipes</i>            | - | 0 | 0 | 0 |
| <i>Rana_warszewitschii</i>        | 0 | 0 | 0 | 0 |
| <i>Rana_weiningensis</i>          | - | 0 | 0 | 0 |
| <i>Rana_yavapaiensis</i>          | - | 0 | 0 | 0 |
| <i>Rana_zhengi</i>                | - | 0 | 0 | 0 |
| <i>Rana_zhenhaiensis</i>          | - | 0 | 0 | 0 |
| <i>Rana_zweifeli</i>              | - | 0 | 0 | 0 |
| <i>Ranitomeya_amazonica</i>       | - | 0 | 0 | 0 |
| <i>Ranitomeya_biolat</i>          | - | 0 | 0 | 0 |
| <i>Ranitomeya_duellmani</i>       | - | 0 | 0 | 0 |
| <i>Ranitomeya_fantastica</i>      | - | 0 | 0 | 0 |
| <i>Ranitomeya_flavovittata</i>    | - | 0 | 0 | 0 |
| <i>Ranitomeya_imitator</i>        | - | 0 | 0 | 0 |
| <i>Ranitomeya_lamasi</i>          | - | 0 | 0 | 0 |
| <i>Ranitomeya_reticulata</i>      | - | 0 | 0 | 0 |
| <i>Ranitomeya_uakarii</i>         | - | 0 | 0 | 0 |
| <i>Ranitomeya_vanzolinii</i>      | - | 0 | 0 | 0 |
| <i>Ranitomeya_variabilis</i>      | - | 0 | 0 | 0 |
| <i>Ranitomeya_ventrimaculata</i>  | - | 0 | 0 | 0 |
| <i>Raorchestes_anili</i>          | - | 0 | 0 | 0 |
| <i>Raorchestes_beddomii</i>       | - | 0 | 0 | 0 |
| <i>Raorchestes_bobingeri</i>      | - | 0 | 0 | 0 |
| <i>Raorchestes_bombayensis</i>    | - | 0 | 0 | 0 |
| <i>Raorchestes_charius</i>        | - | 0 | 0 | 0 |
| <i>Raorchestes_glandulosus</i>    | - | 0 | 0 | 0 |
| <i>Raorchestes_graminirupes</i>   | - | 0 | 0 | 0 |
| <i>Raorchestes_griet</i>          | - | 0 | 0 | 0 |
| <i>Raorchestes_gryllus</i>        | - | 0 | 0 | 0 |
| <i>Raorchestes_longchuanensis</i> | - | 0 | 0 | 0 |
| <i>Raorchestes_menglaensis</i>    | - | 0 | 0 | 0 |
| <i>Raorchestes_nerostagona</i>    | - | 0 | 0 | 0 |
| <i>Raorchestes_ponmudi</i>        | - | 0 | 0 | 0 |
| <i>Raorchestes_signatus</i>       | - | 0 | 0 | 0 |
| <i>Raorchestes_tinniens</i>       | - | 0 | 0 | 0 |
| <i>Raorchestes_travancoricus</i>  | - | 0 | 0 | 0 |
| <i>Raorchestes_tuberohumerus</i>  | - | 0 | 0 | 0 |
| <i>Rhacophorus_annamensis</i>     | 1 | 0 | 0 | 0 |
| <i>Rhacophorus_arboreus</i>       | 1 | 0 | 0 | 0 |
| <i>Rhacophorus_bipunctatus</i>    | 1 | 0 | 0 | 0 |
| <i>Rhacophorus_burmanus</i>       | - | 0 | 0 | 0 |
| <i>Rhacophorus_calcaeus</i>       | - | 0 | 0 | 0 |
| <i>Rhacophorus_chenfui</i>        | - | 0 | 0 | 0 |

|                                           |   |   |   |   |
|-------------------------------------------|---|---|---|---|
| <i>Rhacophorus_dennysi</i>                | - | 0 | 0 | 0 |
| <i>Rhacophorus_dugritei</i>               | - | 0 | 0 | 0 |
| <i>Rhacophorus_feae</i>                   | - | 0 | 0 | 0 |
| <i>Rhacophorus_hui</i>                    | - | 0 | 0 | 0 |
| <i>Rhacophorus_hungfuensis</i>            | - | 0 | 0 | 0 |
| <i>Rhacophorus_kio</i>                    | - | 0 | 0 | 0 |
| <i>Rhacophorus_lateralis</i>              | 1 | 0 | 0 | 0 |
| <i>Rhacophorus_malabaricus</i>            | 1 | 0 | 0 | 0 |
| <i>Rhacophorus_maximus</i>                | 1 | 0 | 0 | 0 |
| <i>Rhacophorus_minimus</i>                | - | 0 | 0 | 0 |
| <i>Rhacophorus_moltrechti</i>             | 1 | 0 | 0 | 0 |
| <i>Rhacophorus_nigropunctatus</i>         | - | 0 | 0 | 0 |
| <i>Rhacophorus_omeimontis</i>             | - | 0 | 0 | 0 |
| <i>Rhacophorus_orlovi</i>                 | - | 0 | 0 | 0 |
| <i>Rhacophorus_puerensis</i>              | - | 0 | 0 | 0 |
| <i>Rhacophorus_reinwardtii</i>            | 1 | 0 | 0 | 0 |
| <i>Rhacophorus_rhodopus</i>               | 1 | 0 | 0 | 0 |
| <i>Rhacophorus_schlegelii</i>             | 1 | 0 | 0 | 0 |
| <i>Rhaebo_glaberrimus</i>                 | - | 0 | 0 | 0 |
| <i>Rhaebo_guttatus</i>                    | - | 0 | 0 | 0 |
| <i>Rhaebo_haematiticus</i>                | - | 0 | 0 | 0 |
| <i>Rhaebo_nasicus</i>                     | - | 0 | 0 | 0 |
| <i>Rhampophryne_festae</i>                | - | 0 | 0 | 0 |
| <i>Rhampophryne_macrorrhina</i>           | - | 0 | 0 | 0 |
| <i>Rhampophryne_proboscidea</i>           | - | 0 | 0 | 0 |
| <i>Rhampophryne_rostrata</i>              | - | 0 | 0 | 0 |
| <i>Rheobates_palmatus</i>                 | - | 0 | 0 | 0 |
| <i>Rheobatrachus_silus</i>                | 1 | 0 | 0 | 0 |
| <i>Rhinella_achavali</i>                  | - | 0 | 0 | 0 |
| <i>Rhinella_amboroensis</i>               | - | 0 | 0 | 0 |
| <i>Rhinella_arenarum</i>                  | - | 0 | 0 | 0 |
| <i>Rhinella_arequipensis</i>              | - | 0 | 0 | 0 |
| <i>Rhinella_arunco</i>                    | - | 0 | 0 | 0 |
| <i>Rhinella_atacamensis</i>               | - | 0 | 0 | 0 |
| <i>Rhinella_castaneotica</i>              | - | 0 | 0 | 0 |
| <i>Rhinella_cf_typhoniuss_KU_215145</i>   | - | 0 | 0 | 0 |
| <i>Rhinella_cf_typhoniuss_USNM_268828</i> | - | 0 | 0 | 0 |
| <i>Rhinella_chavin</i>                    | - | 0 | 0 | 0 |
| <i>Rhinella_crucifer</i>                  | - | 0 | 0 | 0 |
| <i>Rhinella_dapsilis</i>                  | - | 0 | 0 | 0 |
| <i>Rhinella_granulosa</i>                 | - | 0 | 0 | 0 |
| <i>Rhinella_humboldti</i>                 | - | 0 | 0 | 0 |
| <i>Rhinella_icterica</i>                  | - | 0 | 0 | 0 |
| <i>Rhinella_limensis</i>                  | - | 0 | 0 | 0 |

|                                       |   |   |   |   |
|---------------------------------------|---|---|---|---|
| <i>Rhinella_manu</i>                  | - | 0 | 0 | 0 |
| <i>Rhinella_margaritifera</i>         | - | 0 | 0 | 0 |
| <i>Rhinella_marina</i>                | - | 0 | 0 | 0 |
| <i>Rhinella_nesiotes</i>              | - | 0 | 0 | 0 |
| <i>Rhinella_ocellata</i>              | - | 0 | 0 | 0 |
| <i>Rhinella_poepigii</i>              | - | 0 | 0 | 0 |
| <i>Rhinella_rubescens</i>             | - | 0 | 0 | 0 |
| <i>Rhinella_schneideri</i>            | - | 0 | 0 | 0 |
| <i>Rhinella_sp._ESTR00173</i>         | - | 0 | 0 | 0 |
| <i>Rhinella_sp._ROM40103</i>          | - | 0 | 0 | 0 |
| <i>Rhinella_spinulosa</i>             | - | 0 | 0 | 0 |
| <i>Rhinella_vellardi</i>              | - | 0 | 0 | 0 |
| <i>Rhinella_veraguensis</i>           | - | 0 | 0 | 0 |
| <i>Rhinoderma_darwinii</i>            | 1 | 0 | 0 | 0 |
| <i>Rhinophrynus_dorsalis</i>          | 0 | 0 | 0 | 1 |
| <i>Rhombophryne_alluaudi</i>          | - | 0 | 0 | 0 |
| <i>Rhombophryne_coronata</i>          | - | 0 | 0 | 0 |
| <i>Rhombophryne_coudreaui</i>         | - | 0 | 0 | 0 |
| <i>Rhombophryne_laevipes</i>          | - | 0 | 0 | 0 |
| <i>Rhombophryne_minuta</i>            | - | 0 | 0 | 0 |
| <i>Rhombophryne_serratopalpebrosa</i> | - | 0 | 0 | 0 |
| <i>Rhombophryne_testudo</i>           | - | 0 | 0 | 0 |
| <i>Rulyrana_adiazeta</i>              | - | 0 | 0 | 0 |
| <i>Rulyrana_flavopunctata</i>         | 1 | 0 | 0 | 0 |
| <i>Rulyrana_spiculata</i>             | - | 0 | 0 | 0 |
| <i>Rulyrana_susatamai</i>             | - | 0 | 0 | 0 |
| <i>Sachatamia_albomaculata</i>        | - | 0 | 0 | 0 |
| <i>Sachatamia_ilex</i>                | 1 | 0 | 0 | 0 |
| <i>Sachatamia_punctulata</i>          | - | 0 | 0 | 0 |
| <i>Sanguirana_igorota</i>             | - | 0 | 0 | 0 |
| <i>Sanguirana_luzonensis</i>          | - | 0 | 0 | 0 |
| <i>Sanguirana_sanguinea</i>           | - | 0 | 0 | 0 |
| <i>Scaphiophryne_boribory</i>         | - | 0 | 0 | 0 |
| <i>Scaphiophryne_brevis</i>           | - | 0 | 0 | 0 |
| <i>Scaphiophryne_calcarata</i>        | 0 | 0 | 0 | 0 |
| <i>Scaphiophryne_gottlebei</i>        | - | 0 | 0 | 0 |
| <i>Scaphiophryne_madagascariensis</i> | - | 0 | 0 | 0 |
| <i>Scaphiophryne_marmorata</i>        | 0 | 0 | 0 | 0 |
| <i>Scaphiophryne_menabensis</i>       | 0 | 0 | 0 | 0 |
| <i>Scaphiophryne_spinosa</i>          | - | 0 | 0 | 0 |
| <i>Scaphiopus_couchii</i>             | 0 | 0 | 0 | 0 |
| <i>Scaphiopus_holbrookii</i>          | 0 | 0 | 0 | 0 |
| <i>Scaphiopus_hurterii</i>            | - | 0 | 0 | 0 |
| <i>Scarthyla_goinorum</i>             | 0 | 0 | 0 | 0 |

|                                   |   |   |   |   |
|-----------------------------------|---|---|---|---|
| <i>Schismaderma_carens</i>        | - | 0 | 0 | 0 |
| <i>Scinax_acuminatus</i>          | 0 | 0 | 0 | 0 |
| <i>Scinax_berthae</i>             | - | 0 | 0 | 0 |
| <i>Scinax_boesemani</i>           | - | 0 | 0 | 0 |
| <i>Scinax_boulengeri</i>          | 0 | 0 | 0 | 0 |
| <i>Scinax_catharinae</i>          | 0 | 0 | 0 | 0 |
| <i>Scinax_crospedospilus</i>      | - | 0 | 0 | 0 |
| <i>Scinax_cruentommus</i>         | 0 | 0 | 0 | 0 |
| <i>Scinax_elaeochroa</i>          | 0 | 0 | 0 | 0 |
| <i>Scinax_fuscovarius</i>         | 0 | 0 | 0 | 0 |
| <i>Scinax_garbei</i>              | 0 | 0 | 0 | 0 |
| <i>Scinax_jolyi</i>               | - | 0 | 0 | 0 |
| <i>Scinax_nasicus</i>             | 0 | 0 | 0 | 0 |
| <i>Scinax_nebulosus</i>           | - | 0 | 0 | 0 |
| <i>Scinax_proboscideus</i>        | - | 0 | 0 | 0 |
| <i>Scinax_rostratus</i>           | - | 0 | 0 | 0 |
| <i>Scinax_ruber</i>               | 0 | 0 | 0 | 0 |
| <i>Scinax_squalirostris</i>       | 0 | 0 | 0 | 0 |
| <i>Scinax_staufferi</i>           | - | 0 | 0 | 0 |
| <i>Scinax_sugillatus</i>          | - | 0 | 0 | 0 |
| <i>Scinax_uruguayus</i>           | - | 0 | 0 | 0 |
| <i>Scinax_x-signatus</i>          | - | 0 | 0 | 0 |
| <i>Scotobleps_gabonicus</i>       | 0 | 0 | 0 | 0 |
| <i>Scutiger_boulengeri</i>        | - | 0 | 0 | 0 |
| <i>Scutiger_chintingensis</i>     | 0 | 0 | 0 | 0 |
| <i>Scutiger_glandulatus</i>       | - | 0 | 0 | 0 |
| <i>Scutiger_mammatus</i>          | - | 0 | 0 | 0 |
| <i>Scutiger_muliensis</i>         | - | 0 | 0 | 0 |
| <i>Scutiger_tuberculatus</i>      | - | 0 | 0 | 0 |
| <i>Scythrophrys_sawayae</i>       | 0 | 0 | 0 | 0 |
| <i>Sechellophryne_gardinieri</i>  | 1 | 0 | 0 | 0 |
| <i>Sechellophryne_pipilodryas</i> | - | 0 | 0 | 0 |
| <i>Semnodactylus_wealii</i>       | 0 | 0 | 0 | 0 |
| <i>Silverstoneia_flotator</i>     | 1 | 0 | 0 | 0 |
| <i>Silverstoneia_nubicola</i>     | 1 | 0 | 0 | 0 |
| <i>Smilisca_baudinii</i>          | 0 | 0 | 0 | 0 |
| <i>Smilisca_cyanosticta</i>       | 0 | 0 | 0 | 0 |
| <i>Smilisca_fodiens</i>           | - | 0 | 0 | 0 |
| <i>Smilisca_phaeota</i>           | 0 | 0 | 0 | 0 |
| <i>Smilisca_puma</i>              | 0 | 0 | 0 | 0 |
| <i>Smilisca_sila</i>              | - | 0 | 0 | 0 |
| <i>Smilisca_sordida</i>           | - | 0 | 0 | 0 |
| <i>Sooglossus_sechellensis</i>    | 1 | 0 | 0 | 0 |
| <i>Sooglossus_thomasseti</i>      | - | 0 | 0 | 0 |

|                                     |   |   |   |   |
|-------------------------------------|---|---|---|---|
| <i>Spea_bombifrons</i>              | 0 | 0 | 0 | 0 |
| <i>Spea_hammondii</i>               | 0 | 0 | 0 | 0 |
| <i>Spea_intermontana</i>            | 0 | 0 | 0 | 0 |
| <i>Spea_multiplicata</i>            | 0 | 0 | 0 | 0 |
| <i>Spelaeophryne_methneri</i>       | 1 | 0 | 0 | 0 |
| <i>Sphaenorhynchus_dorisae</i>      | 0 | 0 | 0 | 0 |
| <i>Sphaenorhynchus_lacteus</i>      | 0 | 0 | 0 | 0 |
| <i>Sphaenorhynchus_orophilus</i>    | - | 0 | 0 | 0 |
| <i>Sphaerotheca_breviceps</i>       | 0 | 0 | 0 | 0 |
| <i>Sphaerotheca_dobsonii</i>        | - | 0 | 0 | 0 |
| <i>Sphenophryne_cornuta</i>         | 1 | 0 | 0 | 0 |
| <i>Spicospina_flammoaerulea</i>     | 0 | 0 | 0 | 0 |
| <i>Spinomantis_aglavei</i>          | 0 | 0 | 0 | 0 |
| <i>Spinomantis_elegans</i>          | 0 | 0 | 0 | 0 |
| <i>Spinomantis_peraccaae</i>        | 0 | 0 | 0 | 0 |
| <i>Stauroides_latopalermatus</i>    | 0 | 0 | 0 | 0 |
| <i>Stauroides_natator</i>           | 0 | 0 | 0 | 0 |
| <i>Stauroides_parvus</i>            | - | 0 | 0 | 0 |
| <i>Stauroides_tuberilinguis</i>     | - | 0 | 0 | 0 |
| <i>Stefania_coxi</i>                | - | 0 | 1 | 0 |
| <i>Stefania_evansi</i>              | 1 | 0 | 1 | 0 |
| <i>Stefania_ginesi</i>              | 1 | 0 | 1 | 0 |
| <i>Stefania_scalae</i>              | - | 0 | 1 | 0 |
| <i>Stefania_schuberti</i>           | - | 0 | 1 | 0 |
| <i>Stephopaedes_anotis</i>          | 0 | 0 | 0 | 0 |
| <i>Stephopaedes_loveridgei</i>      | - | 0 | 0 | 0 |
| <i>Strabomantis_anomalus</i>        | - | 0 | 0 | 0 |
| <i>Strabomantis_biporcatus</i>      | - | 0 | 0 | 0 |
| <i>Strabomantis_bufoniformis</i>    | - | 0 | 0 | 0 |
| <i>Strabomantis_necerus</i>         | - | 0 | 0 | 0 |
| <i>Strabomantis_sulcatus</i>        | 1 | 0 | 0 | 0 |
| <i>Strongylopus_bonaespei</i>       | - | 0 | 0 | 0 |
| <i>Strongylopus_fasciatus</i>       | 0 | 0 | 0 | 0 |
| <i>Strongylopus_grayii</i>          | 1 | 0 | 0 | 0 |
| <i>Stumpffia_gimmeli</i>            | - | 0 | 0 | 0 |
| <i>Stumpffia_grandis</i>            | 1 | 0 | 0 | 0 |
| <i>Stumpffia_helenae</i>            | - | 0 | 0 | 0 |
| <i>Stumpffia_psologlossa</i>        | 1 | 0 | 0 | 0 |
| <i>Stumpffia_pygmaea</i>            | - | 0 | 0 | 0 |
| <i>Stumpffia_roseifemoralis</i>     | - | 0 | 0 | 0 |
| <i>Stumpffia_tetradactyla</i>       | - | 0 | 0 | 0 |
| <i>Stumpffia_tridactyla</i>         | - | 0 | 0 | 0 |
| <i>Synapturanus_mirandaribeiroi</i> | 1 | 0 | 0 | 0 |
| <i>Tachycnemis_seychellensis</i>    | 0 | 0 | 0 | 0 |



|                                  |   |   |   |   |
|----------------------------------|---|---|---|---|
| <i>Taudactylus_acutirostris</i>  | 0 | 0 | 0 | 0 |
| <i>Telmatobius_bolivianus</i>    | - | 0 | 0 | 0 |
| <i>Telmatobius_culeus</i>        | - | 0 | 0 | 0 |
| <i>Telmatobius_espadai</i>       | - | 0 | 0 | 0 |
| <i>Telmatobius_gigas</i>         | - | 0 | 0 | 0 |
| <i>Telmatobius_hintoni</i>       | - | 0 | 0 | 0 |
| <i>Telmatobius_huayra</i>        | - | 0 | 0 | 0 |
| <i>Telmatobius_marmoratus</i>    | - | 0 | 0 | 0 |
| <i>Telmatobius_niger</i>         | - | 0 | 0 | 0 |
| <i>Telmatobius_sanborni</i>      | - | 0 | 0 | 0 |
| <i>Telmatobius_sibiricus</i>     | - | 0 | 0 | 0 |
| <i>Telmatobius_simonsi</i>       | - | 0 | 0 | 0 |
| <i>Telmatobius_truebae</i>       | - | 0 | 0 | 0 |
| <i>Telmatobius_vellardi</i>      | - | 0 | 0 | 0 |
| <i>Telmatobius_verrucosus</i>    | - | 0 | 0 | 0 |
| <i>Telmatobius_vilamensis</i>    | - | 0 | 0 | 0 |
| <i>Telmatobius_yuracare</i>      | - | 0 | 0 | 0 |
| <i>Telmatobius_zapahuirensis</i> | - | 0 | 0 | 0 |
| <i>Telmatobufo_bullocki</i>      | - | 0 | 0 | 0 |
| <i>Telmatobufo_venustus</i>      | 0 | 0 | 0 | 0 |
| <i>Tepuihyla_aecii</i>           | - | 0 | 0 | 0 |
| <i>Tepuihyla_edelcae</i>         | 0 | 0 | 0 | 0 |
| <i>Teratohyla_midas</i>          | 1 | 0 | 0 | 0 |
| <i>Teratohyla_pulverata</i>      | - | 0 | 0 | 0 |
| <i>Teratohyla_spinosa</i>        | 0 | 0 | 0 | 0 |
| <i>Theلودerma_asperum</i>        | 1 | 0 | 0 | 0 |
| <i>Theلودerma_bicolor</i>        | - | 0 | 0 | 0 |
| <i>Theلودerma_corticale</i>      | - | 0 | 0 | 0 |
| <i>Theلودerma_moloch</i>         | - | 0 | 0 | 0 |
| <i>Theلودerma_rhododiscus</i>    | - | 0 | 0 | 0 |
| <i>Thoropa_miliaris</i>          | 0 | 0 | 0 | 0 |
| <i>Thoropa_taophora</i>          | - | 0 | 0 | 0 |
| <i>Tlalocohyla_godmani</i>       | - | 0 | 0 | 0 |
| <i>Tlalocohyla_loquax</i>        | 0 | 0 | 0 | 0 |
| <i>Tlalocohyla_picta</i>         | 0 | 0 | 0 | 0 |
| <i>Tlalocohyla_smithii</i>       | - | 0 | 0 | 0 |
| <i>Tomopterna_cryptotis</i>      | 0 | 0 | 0 | 0 |
| <i>Tomopterna_damarensis</i>     | - | 0 | 0 | 0 |
| <i>Tomopterna_delalandii</i>     | - | 0 | 0 | 0 |
| <i>Tomopterna_krugerensis</i>    | 0 | 0 | 0 | 0 |
| <i>Tomopterna_luganga</i>        | - | 0 | 0 | 0 |
| <i>Tomopterna_marmorata</i>      | 0 | 0 | 0 | 0 |
| <i>Tomopterna_natalensis</i>     | 0 | 0 | 0 | 0 |
| <i>Tomopterna_tandyi</i>         | 0 | 0 | 0 | 0 |

|                                       |   |   |   |   |
|---------------------------------------|---|---|---|---|
| <i>Tomopterna_tuberculosa</i>         | - | 0 | 0 | 0 |
| <i>Torrentophryne_aspinia</i>         | - | 0 | 0 | 0 |
| <i>Torrentophryne_tuberospinia</i>    | - | 0 | 0 | 0 |
| <i>Trachycephalus_coriaceus</i>       | 0 | 0 | 0 | 0 |
| <i>Trachycephalus_hadroceps</i>       | - | 0 | 0 | 0 |
| <i>Trachycephalus_imitatrix</i>       | - | 0 | 0 | 0 |
| <i>Trachycephalus_jordani</i>         | - | 0 | 0 | 0 |
| <i>Trachycephalus_mesophaeus</i>      | - | 0 | 0 | 0 |
| <i>Trachycephalus_nigromaculatus</i>  | - | 0 | 0 | 0 |
| <i>Trachycephalus_resinifictrix</i>   | 0 | 0 | 0 | 0 |
| <i>Trachycephalus_venulosus</i>       | 0 | 0 | 0 | 0 |
| <i>Trichobatrachus_robustus</i>       | 0 | 0 | 0 | 0 |
| <i>Triprion_petasatus</i>             | 0 | 0 | 0 | 0 |
| <i>Triprion_spatulata</i>             | - | 0 | 0 | 0 |
| <i>Uperodon_systema</i>               | 0 | 0 | 0 | 0 |
| <i>Uperoleia_laevigata</i>            | - | 0 | 0 | 0 |
| <i>Uperoleia_littlejohni</i>          | - | 0 | 0 | 0 |
| <i>Vandijkophrynus_amatolicus</i>     | - | 0 | 0 | 0 |
| <i>Vandijkophrynus_angusticeps</i>    | - | 0 | 0 | 0 |
| <i>Vandijkophrynus_gariepensis</i>    | - | 0 | 0 | 0 |
| <i>Vandijkophrynus_inyangae</i>       | - | 0 | 0 | 0 |
| <i>Vandijkophrynus_robinsoni</i>      | - | 0 | 0 | 0 |
| <i>Vibrissaphora_echinata</i>         | - | 0 | 0 | 0 |
| <i>Vitreorana_castroviejoi</i>        | - | 0 | 0 | 0 |
| <i>Vitreorana_gorzulae</i>            | - | 0 | 0 | 0 |
| <i>Vitreorana_helenae</i>             | - | 0 | 0 | 0 |
| <i>Vitreorana_oyampiensis</i>         | - | 0 | 0 | 0 |
| <i>Wakea_madinika</i>                 | - | 0 | 0 | 0 |
| <i>Werneria_mertensiana</i>           | - | 0 | 0 | 0 |
| <i>Wolterstorffina_parvipalmata</i>   | - | 0 | 0 | 0 |
| <i>Xanthophryne_koynayensis</i>       | - | 0 | 0 | 0 |
| <i>Xenohyla_truncata</i>              | - | 0 | 0 | 0 |
| <i>Xenophrys_baluensis</i>            | - | 0 | 0 | 0 |
| <i>Xenophrys_legkaguli</i>            | - | 0 | 0 | 0 |
| <i>Xenophrys_major</i>                | - | 0 | 0 | 0 |
| <i>Xenophrys_minor</i>                | - | 0 | 0 | 0 |
| <i>Xenophrys_nankiangensis</i>        | - | 0 | 0 | 0 |
| <i>Xenophrys_omeimontis</i>           | - | 0 | 0 | 0 |
| <i>Xenophrys_spinata</i>              | - | 0 | 0 | 0 |
| <i>Xenopus_amieti</i>                 | - | 0 | 0 | 0 |
| <i>Xenopus_andrei</i>                 | - | 0 | 0 | 0 |
| <i>Xenopus_borealis</i>               | - | 0 | 0 | 0 |
| <i>Xenopus_boumbaensis</i>            | - | 0 | 0 | 0 |
| <i>Xenopus_cf._fraseri_1_BJE-2004</i> | - | 0 | 0 | 0 |

|                                      |   |   |   |   |
|--------------------------------------|---|---|---|---|
| <i>Xenopus_cf_fraseri_2_BJE-2004</i> | - | 0 | 0 | 0 |
| <i>Xenopus_clivii</i>                | - | 0 | 0 | 0 |
| <i>Xenopus_epitropicalis</i>         | - | 0 | 0 | 0 |
| <i>Xenopus_fraseri</i>               | - | 0 | 0 | 0 |
| <i>Xenopus_gilli</i>                 | - | 0 | 0 | 0 |
| <i>Xenopus_laevis</i>                | 0 | 0 | 0 | 0 |
| <i>Xenopus_largeni</i>               | - | 0 | 0 | 0 |
| <i>Xenopus_longipes</i>              | - | 0 | 0 | 0 |
| <i>Xenopus_muelleri</i>              | 0 | 0 | 0 | 0 |
| <i>Xenopus_pygmaeus</i>              | - | 0 | 0 | 0 |
| <i>Xenopus_ruwenzoriensis</i>        | - | 0 | 0 | 0 |
| <i>Xenopus_sp_KR-2004</i>            | - | 0 | 0 | 0 |
| <i>Xenopus_tropicalis</i>            | - | 0 | 0 | 0 |
| <i>Xenopus_vestitus</i>              | - | 0 | 0 | 0 |
| <i>Xenopus_wittei</i>                | - | 0 | 0 | 0 |
| <i>Xenorhina_bouwensi</i>            | 0 | 0 | 0 | 0 |
| <i>Xenorhina_lanthanites</i>         | - | 0 | 0 | 0 |
| <i>Xenorhina_obesa</i>               | - | 0 | 0 | 0 |
| <i>Xenorhina_oxycephala</i>          | - | 0 | 0 | 0 |
| <i>Xenorhina_varia</i>               | - | 0 | 0 | 0 |
| <i>Yunganastes_ashkapara</i>         | - | 0 | 0 | 0 |
| <i>Yunganastes_bisignatus</i>        | - | 0 | 0 | 0 |
| <i>Yunganastes_fraudator</i>         | - | 0 | 0 | 0 |
| <i>Yunganastes_mercedesae</i>        | - | 0 | 0 | 0 |
| <i>Yunganastes_pluvicanorus</i>      | - | 0 | 0 | 0 |
| <b>Monotremata</b>                   |   |   |   |   |
| <i>Ornithorhynchus_anatinus</i>      | 1 | 0 | 1 | 1 |
| <i>Tachyglossus_aculeatus</i>        | 1 | 0 | 1 | 0 |
| <i>Zaglossus_bruijni</i>             | 1 | 0 | 1 | 0 |
| <b>Metatheria</b>                    |   |   |   |   |
| <i>Acrobates_pygmaeus</i>            | 0 | 0 | 0 | 0 |
| <i>Aepyprymnus_rufescens</i>         | 0 | 0 | 0 | 0 |
| <i>Ailurops_ursinus</i>              | 0 | 0 | 0 | 0 |
| <i>Antechinomys_laniger</i>          | 0 | 0 | 0 | 0 |
| <i>Antechinus_bellus</i>             | 0 | 0 | 0 | 0 |
| <i>Antechinus_flavipes</i>           | 0 | 0 | 0 | 0 |
| <i>Antechinus_godmani</i>            | 0 | 0 | 0 | 0 |
| <i>Antechinus_leo</i>                | 0 | 0 | 0 | 0 |
| <i>Antechinus_minimus</i>            | 0 | 0 | 0 | 0 |
| <i>Antechinus_stuartii</i>           | 0 | 0 | 0 | 0 |
| <i>Antechinus_swainsonii</i>         | 0 | 0 | 0 | 0 |
| <i>Bettongia_gaimardi</i>            | 0 | 0 | 0 | 0 |
| <i>Bettongia_lesueur</i>             | 0 | 0 | 0 | 0 |
| <i>Bettongia_penicillata</i>         | 0 | 0 | 0 | 0 |

|                                 |   |   |   |   |
|---------------------------------|---|---|---|---|
| <i>Bettongia_tropica</i>        | 0 | 0 | 0 | 0 |
| <i>Burramys_parvus</i>          | 0 | 0 | 0 | 0 |
| <i>Caenolestes_fuliginosus</i>  | 0 | 0 | 0 | 0 |
| <i>Caloprymnus_campestris</i>   | 0 | 0 | 0 | 0 |
| <i>Caluromys_derbianus</i>      | 0 | 0 | 0 | 0 |
| <i>Caluromys_lanatus</i>        | 0 | 0 | 0 | 0 |
| <i>Caluromys_philander</i>      | 0 | 0 | 0 | 0 |
| <i>Caluromysiops_irrupta</i>    | 0 | 0 | 0 | 0 |
| <i>Cercartetus_caudatus</i>     | 0 | 0 | 0 | 0 |
| <i>Cercartetus_concinnus</i>    | 0 | 0 | 0 | 0 |
| <i>Cercartetus_lepidus</i>      | 0 | 0 | 0 | 0 |
| <i>Cercartetus_nanus</i>        | 0 | 0 | 0 | 0 |
| <i>Chaeropus_ecaudatus</i>      | 0 | 0 | 0 | 0 |
| <i>Chironectes_minimus</i>      | 0 | 0 | 0 | 0 |
| <i>Dactylopsila_palpator</i>    | 0 | 0 | 0 | 0 |
| <i>Dactylopsila_trivirgata</i>  | 0 | 0 | 0 | 0 |
| <i>Dasyercus_cristicauda</i>    | 0 | 0 | 0 | 0 |
| <i>Dasykaluta_rosamondae</i>    | 0 | 0 | 0 | 0 |
| <i>Dasyuroides_byrnei</i>       | 0 | 0 | 0 | 0 |
| <i>Dasyurus_albopunctatus</i>   | 0 | 0 | 0 | 0 |
| <i>Dasyurus_geoffroii</i>       | 0 | 0 | 0 | 0 |
| <i>Dasyurus_hallucatus</i>      | 0 | 0 | 0 | 0 |
| <i>Dasyurus_maculatus</i>       | 0 | 0 | 0 | 0 |
| <i>Dasyurus_spartacus</i>       | 0 | 0 | 0 | 0 |
| <i>Dasyurus_viverrinus</i>      | 0 | 0 | 0 | 0 |
| <i>Dendrolagus_bennettianus</i> | 0 | 0 | 0 | 0 |
| <i>Dendrolagus_dorianus</i>     | 0 | 0 | 0 | 0 |
| <i>Dendrolagus_goodfellowi</i>  | 0 | 0 | 0 | 0 |
| <i>Dendrolagus_inustus</i>      | 0 | 0 | 0 | 0 |
| <i>Dendrolagus_lumholtzi</i>    | 0 | 0 | 0 | 0 |
| <i>Dendrolagus_matschiei</i>    | 0 | 0 | 0 | 0 |
| <i>Dendrolagus_scottae</i>      | 0 | 0 | 0 | 0 |
| <i>Dendrolagus_spadix</i>       | 0 | 0 | 0 | 0 |
| <i>Didelphis_albiventris</i>    | 0 | 0 | 0 | 0 |
| <i>Didelphis_aurita</i>         | 0 | 0 | 0 | 0 |
| <i>Didelphis_imperfecta</i>     | 0 | 0 | 0 | 0 |
| <i>Didelphis_marsupialis</i>    | 0 | 0 | 0 | 0 |
| <i>Didelphis_ornata</i>         | 0 | 0 | 0 | 0 |
| <i>Didelphis_virginiana</i>     | 0 | 0 | 0 | 0 |
| <i>Distoechurus_pennatus</i>    | 0 | 0 | 0 | 0 |
| <i>Dorcopsis_veterum</i>        | 0 | 0 | 0 | 0 |
| <i>Dorcopsulus_vanheurni</i>    | 0 | 0 | 0 | 0 |
| <i>Dromiciops_gliroides</i>     | 0 | 0 | 0 | 0 |
| <i>Echymipera_clara</i>         | 0 | 0 | 0 | 0 |

|                                    |   |   |   |   |
|------------------------------------|---|---|---|---|
| <i>Echymipera_kalubu</i>           | 0 | 0 | 0 | 0 |
| <i>Echymipera_rufescens</i>        | 0 | 0 | 0 | 0 |
| <i>Glironia_yenusta</i>            | 0 | 0 | 0 | 0 |
| <i>Gracilinanus_aceramarcae</i>    | 0 | 0 | 0 | 0 |
| <i>Gracilinanus_agilis</i>         | 0 | 0 | 0 | 0 |
| <i>Gracilinanus_emiliae</i>        | 0 | 0 | 0 | 0 |
| <i>Gracilinanus_microtarsus</i>    | 0 | 0 | 0 | 0 |
| <i>Gymnobelideus_leadbeateri</i>   | 0 | 0 | 0 | 0 |
| <i>Hemibelideus_lemuroides</i>     | 0 | 0 | 0 | 0 |
| <i>Hypsiprymnodon_moschatus</i>    | 0 | 0 | 0 | 0 |
| <i>Isoodon_auratus</i>             | 0 | 0 | 0 | 0 |
| <i>Isoodon_macrourus</i>           | 0 | 0 | 0 | 0 |
| <i>Isoodon_obesulus</i>            | 0 | 0 | 0 | 0 |
| <i>Lagorchestes_conspicillatus</i> | 0 | 0 | 0 | 0 |
| <i>Lagorchestes_hirsutus</i>       | 0 | 0 | 0 | 0 |
| <i>Lagostrophus_fasciatus</i>      | 0 | 0 | 0 | 0 |
| <i>Lasiorhinus_krefftii</i>        | 0 | 0 | 0 | 0 |
| <i>Lasiorhinus_latifrons</i>       | 0 | 0 | 0 | 0 |
| <i>Lestodelphys_halli</i>          | 0 | 0 | 0 | 0 |
| <i>Lestoros_inca</i>               | 0 | 0 | 0 | 0 |
| <i>Lutreolina_crassicaudata</i>    | 0 | 0 | 0 | 0 |
| <i>Macropus_agilis</i>             | 0 | 0 | 0 | 0 |
| <i>Macropus_antilopinus</i>        | 0 | 0 | 0 | 0 |
| <i>Macropus_eugenii</i>            | 0 | 0 | 0 | 0 |
| <i>Macropus_fuliginosus</i>        | 0 | 0 | 0 | 0 |
| <i>Macropus_giganteus</i>          | 0 | 0 | 0 | 0 |
| <i>Macropus_irma</i>               | 0 | 0 | 0 | 0 |
| <i>Macropus_parma</i>              | 0 | 0 | 0 | 0 |
| <i>Macropus_parryi</i>             | 0 | 0 | 0 | 0 |
| <i>Macropus_robustus</i>           | 0 | 0 | 0 | 0 |
| <i>Macropus_rufogriseus</i>        | 0 | 0 | 0 | 0 |
| <i>Macropus_rufus</i>              | 0 | 0 | 0 | 0 |
| <i>Macrotis_lagotis</i>            | 0 | 0 | 0 | 0 |
| <i>Marmosa_lepida</i>              | 0 | 0 | 0 | 0 |
| <i>Marmosa_mexicana</i>            | 0 | 0 | 0 | 0 |
| <i>Marmosa_murina</i>              | 0 | 0 | 0 | 0 |
| <i>Marmosa_robinsoni</i>           | 0 | 0 | 0 | 0 |
| <i>Marmosa_rubra</i>               | 0 | 0 | 0 | 0 |
| <i>Marmosa_tyleriana</i>           | 0 | 0 | 0 | 0 |
| <i>Marmosa_xerophila</i>           | 0 | 0 | 0 | 0 |
| <i>Marmosops_dorothea</i>          | 0 | 0 | 0 | 0 |
| <i>Marmosops_impavidus</i>         | 0 | 0 | 0 | 0 |
| <i>Marmosops_incanus</i>           | 0 | 0 | 0 | 0 |
| <i>Marmosops_invictus</i>          | 0 | 0 | 0 | 0 |

|                                     |   |   |   |   |
|-------------------------------------|---|---|---|---|
| <i>Marmosops_noctivagus</i>         | 0 | 0 | 0 | 0 |
| <i>Marmosops_parvidens</i>          | 0 | 0 | 0 | 0 |
| <i>Marmosops_pinheiroi</i>          | 0 | 0 | 0 | 0 |
| <i>Metachirus_nudicaudatus</i>      | 0 | 0 | 0 | 0 |
| <i>Micoureus_constantiae</i>        | 0 | 0 | 0 | 0 |
| <i>Micoureus_demerarae</i>          | 0 | 0 | 0 | 0 |
| <i>Micoureus_paraguayanus</i>       | 0 | 0 | 0 | 0 |
| <i>Micoureus_regina</i>             | 0 | 0 | 0 | 0 |
| <i>Micromurexia_habbema</i>         | 0 | 0 | 0 | 0 |
| <i>Microperoryctes_aplini</i>       | 0 | 0 | 0 | 0 |
| <i>Microperoryctes_longicauda</i>   | 0 | 0 | 0 | 0 |
| <i>Microperoryctes_papuensis</i>    | 0 | 0 | 0 | 0 |
| <i>Microperoryctes_sp._RWM-2011</i> | 0 | 0 | 0 | 0 |
| <i>Monodelphis_adusta</i>           | 0 | 0 | 0 | 0 |
| <i>Monodelphis_americana</i>        | 0 | 0 | 0 | 0 |
| <i>Monodelphis_brevicaudata</i>     | 0 | 0 | 0 | 0 |
| <i>Monodelphis_dimidiata</i>        | 0 | 0 | 0 | 0 |
| <i>Monodelphis_domestica</i>        | 0 | 0 | 0 | 0 |
| <i>Monodelphis_emiliae</i>          | 0 | 0 | 0 | 0 |
| <i>Monodelphis_girina</i>           | 0 | 0 | 0 | 0 |
| <i>Monodelphis_iheringi</i>         | 0 | 0 | 0 | 0 |
| <i>Monodelphis_kunsi</i>            | 0 | 0 | 0 | 0 |
| <i>Monodelphis_osgoodi</i>          | 0 | 0 | 0 | 0 |
| <i>Monodelphis_scalops</i>          | 0 | 0 | 0 | 0 |
| <i>Monodelphis_sorex</i>            | 0 | 0 | 0 | 0 |
| <i>Monodelphis_theresa</i>          | 0 | 0 | 0 | 0 |
| <i>Monodelphis_umbristriata</i>     | 0 | 0 | 0 | 0 |
| <i>Murexia_longicaudata</i>         | 0 | 0 | 0 | 0 |
| <i>Myoictis_melas</i>               | 0 | 0 | 0 | 0 |
| <i>Myrmecobius_fasciatus</i>        | 0 | 0 | 0 | 0 |
| <i>Neophascogale_lorentzii</i>      | 0 | 0 | 0 | 0 |
| <i>Ningaiu_ridei</i>                | 0 | 0 | 0 | 0 |
| <i>Ningaiu_timealeyi</i>            | 0 | 0 | 0 | 0 |
| <i>Ningaiu_yvonnae</i>              | 0 | 0 | 0 | 0 |
| <i>Notoryctes_caurinus</i>          | 0 | 0 | 0 | 0 |
| <i>Notoryctes_typhlops</i>          | 0 | 0 | 0 | 0 |
| <i>Onychogalea_fraenata</i>         | 0 | 0 | 0 | 0 |
| <i>Onychogalea_unguifera</i>        | 0 | 0 | 0 | 0 |
| <i>Paramurexia_rothschildi</i>      | 0 | 0 | 0 | 0 |
| <i>Parantechinus_apicalis</i>       | 0 | 0 | 0 | 0 |
| <i>Perameles_bougainville</i>       | 0 | 0 | 0 | 0 |
| <i>Perameles_eremiana</i>           | 0 | 0 | 0 | 0 |
| <i>Perameles_gunnii</i>             | 0 | 0 | 0 | 0 |
| <i>Perameles_nasuta</i>             | 0 | 0 | 0 | 0 |

|                                 |   |   |   |   |
|---------------------------------|---|---|---|---|
| <i>Peroryctes_broadbenti</i>    | 0 | 0 | 0 | 0 |
| <i>Peroryctes_raffrayana</i>    | 0 | 0 | 0 | 0 |
| <i>Petauroides_volans</i>       | 0 | 0 | 0 | 0 |
| <i>Petaurus_abidi</i>           | 0 | 0 | 0 | 0 |
| <i>Petaurus_australis</i>       | 0 | 0 | 0 | 0 |
| <i>Petaurus_breviceps</i>       | 0 | 0 | 0 | 0 |
| <i>Petaurus_gracilis</i>        | 0 | 0 | 0 | 0 |
| <i>Petaurus_norfolcensis</i>    | 0 | 0 | 0 | 0 |
| <i>Petrogale_assimilis</i>      | 0 | 0 | 0 | 0 |
| <i>Petrogale_brachyotis</i>     | 0 | 0 | 0 | 0 |
| <i>Petrogale_burbidgei</i>      | 0 | 0 | 0 | 0 |
| <i>Petrogale_concinna</i>       | 0 | 0 | 0 | 0 |
| <i>Petrogale_godmani</i>        | 0 | 0 | 0 | 0 |
| <i>Petrogale_herberti</i>       | 0 | 0 | 0 | 0 |
| <i>Petrogale_inornata</i>       | 0 | 0 | 0 | 0 |
| <i>Petrogale_lateralis</i>      | 0 | 0 | 0 | 0 |
| <i>Petrogale_penicillata</i>    | 0 | 0 | 0 | 0 |
| <i>Petrogale_persephone</i>     | 0 | 0 | 0 | 0 |
| <i>Petrogale_purpureicollis</i> | 0 | 0 | 0 | 0 |
| <i>Petrogale_rothschildi</i>    | 0 | 0 | 0 | 0 |
| <i>Petrogale_xanthopus</i>      | 0 | 0 | 0 | 0 |
| <i>Petropseudes_dahli</i>       | 0 | 0 | 0 | 0 |
| <i>Phalanger_carmelitae</i>     | 0 | 0 | 0 | 0 |
| <i>Phalanger_gymnotis</i>       | 0 | 0 | 0 | 0 |
| <i>Phalanger_lullulae</i>       | 0 | 0 | 0 | 0 |
| <i>Phalanger_orientalis</i>     | 0 | 0 | 0 | 0 |
| <i>Phalanger_sericeus</i>       | 0 | 0 | 0 | 0 |
| <i>Phalanger_vestitus</i>       | 0 | 0 | 0 | 0 |
| <i>Phascogale_calura</i>        | 0 | 0 | 0 | 0 |
| <i>Phascogale_tapoatafa</i>     | 0 | 0 | 0 | 0 |
| <i>Phascolarctos_cinereus</i>   | 0 | 0 | 0 | 0 |
| <i>Phascolosorex_doriae</i>     | 0 | 0 | 0 | 0 |
| <i>Phascolosorex_dorsalis</i>   | 0 | 0 | 0 | 0 |
| <i>Phascomurexia_naso</i>       | 0 | 0 | 0 | 0 |
| <i>Philander_andersoni</i>      | 0 | 0 | 0 | 0 |
| <i>Philander_frenatus</i>       | 0 | 0 | 0 | 0 |
| <i>Philander_mcilhennyi</i>     | 0 | 0 | 0 | 0 |
| <i>Philander_opossum</i>        | 0 | 0 | 0 | 0 |
| <i>Planigale_gilesi</i>         | 0 | 0 | 0 | 0 |
| <i>Planigale_ingrami</i>        | 0 | 0 | 0 | 0 |
| <i>Planigale_maculata</i>       | 0 | 0 | 0 | 0 |
| <i>Planigale_novaeguineae</i>   | 0 | 0 | 0 | 0 |
| <i>Planigale_tenuirostris</i>   | 0 | 0 | 0 | 0 |
| <i>Potorous_gilbertii</i>       | 0 | 0 | 0 | 0 |

|                                        |   |   |   |   |
|----------------------------------------|---|---|---|---|
| <i>Potorous_longipes</i>               | 0 | 0 | 0 | 0 |
| <i>Potorous_platyops</i>               | 0 | 0 | 0 | 0 |
| <i>Potorous_tridactylus</i>            | 0 | 0 | 0 | 0 |
| <i>Pseudantechinus_bilarni</i>         | 0 | 0 | 0 | 0 |
| <i>Pseudantechinus_macdonnellensis</i> | 0 | 0 | 0 | 0 |
| <i>Pseudantechinus_mimulus</i>         | 0 | 0 | 0 | 0 |
| <i>Pseudantechinus_ningbing</i>        | 0 | 0 | 0 | 0 |
| <i>Pseudantechinus_woolleyae</i>       | 0 | 0 | 0 | 0 |
| <i>Pseudocheirus_peregrinus</i>        | 0 | 0 | 0 | 0 |
| <i>Pseudochirops_albertisii</i>        | 0 | 0 | 0 | 0 |
| <i>Pseudochirops_archeri</i>           | 0 | 0 | 0 | 0 |
| <i>Pseudochirops_corinnae</i>          | 0 | 0 | 0 | 0 |
| <i>Pseudochirops_cupreus</i>           | 0 | 0 | 0 | 0 |
| <i>Pseudochirulus_canescens</i>        | 0 | 0 | 0 | 0 |
| <i>Pseudochirulus_caroli</i>           | 0 | 0 | 0 | 0 |
| <i>Pseudochirulus_forbesi</i>          | 0 | 0 | 0 | 0 |
| <i>Pseudochirulus_herbertensis</i>     | 0 | 0 | 0 | 0 |
| <i>Pseudochirulus_mayeri</i>           | 0 | 0 | 0 | 0 |
| <i>Rhyncholestes_raphanurus</i>        | 0 | 0 | 0 | 0 |
| <i>Rhynchomeles_prattorum</i>          | 0 | 0 | 0 | 0 |
| <i>Sarcophilus_harrisii</i>            | 0 | 0 | 0 | 0 |
| <i>Setonix_brachyurus</i>              | 0 | 0 | 0 | 0 |
| <i>Sminthopsis_aitkeni</i>             | 0 | 0 | 0 | 0 |
| <i>Sminthopsis_archeri</i>             | 0 | 0 | 0 | 0 |
| <i>Sminthopsis_butleri</i>             | 0 | 0 | 0 | 0 |
| <i>Sminthopsis_crassicaudata</i>       | 0 | 0 | 0 | 0 |
| <i>Sminthopsis_dolichura</i>           | 0 | 0 | 0 | 0 |
| <i>Sminthopsis_douglasi</i>            | 0 | 0 | 0 | 0 |
| <i>Sminthopsis_gilberti</i>            | 0 | 0 | 0 | 0 |
| <i>Sminthopsis_granulipes</i>          | 0 | 0 | 0 | 0 |
| <i>Sminthopsis_griseoventer</i>        | 0 | 0 | 0 | 0 |
| <i>Sminthopsis_hirtipes</i>            | 0 | 0 | 0 | 0 |
| <i>Sminthopsis_leucopus</i>            | 0 | 0 | 0 | 0 |
| <i>Sminthopsis_longicaudata</i>        | 0 | 0 | 0 | 0 |
| <i>Sminthopsis_macroura</i>            | 0 | 0 | 0 | 0 |
| <i>Sminthopsis_murina</i>              | 0 | 0 | 0 | 0 |
| <i>Sminthopsis_ooldea</i>              | 0 | 0 | 0 | 0 |
| <i>Sminthopsis_psammophila</i>         | 0 | 0 | 0 | 0 |
| <i>Sminthopsis_virginiae</i>           | 0 | 0 | 0 | 0 |
| <i>Sminthopsis_youngsoni</i>           | 0 | 0 | 0 | 0 |
| <i>Spilocuscus_maculatus</i>           | 0 | 0 | 0 | 0 |
| <i>Spilocuscus_rufoniger</i>           | 0 | 0 | 0 | 0 |
| <i>Strigocuscus_celebensis</i>         | 0 | 0 | 0 | 0 |
| <i>Strigocuscus_pelengensis</i>        | 0 | 0 | 0 | 0 |



|                                |   |   |   |   |
|--------------------------------|---|---|---|---|
| <i>Tarsipes_rostratus</i>      | 0 | 0 | 0 | 0 |
| <i>Thylacinus_cynocephalus</i> | 0 | 0 | 0 | 0 |
| <i>Thylamys_cinderella</i>     | 0 | 0 | 0 | 0 |
| <i>Thylamys_elegans</i>        | 0 | 0 | 0 | 0 |
| <i>Thylamys_karimii</i>        | 0 | 0 | 0 | 0 |
| <i>Thylamys_macrura</i>        | 0 | 0 | 0 | 0 |
| <i>Thylamys_pallidior</i>      | 0 | 0 | 0 | 0 |
| <i>Thylamys_pusillus</i>       | 0 | 0 | 0 | 0 |
| <i>Thylamys_sponsorius</i>     | 0 | 0 | 0 | 0 |
| <i>Thylamys_tatei</i>          | 0 | 0 | 0 | 0 |
| <i>Thylamys_venustus</i>       | 0 | 0 | 0 | 0 |
| <i>Thylogale_billardierii</i>  | 0 | 0 | 0 | 0 |
| <i>Thylogale_browni</i>        | 0 | 0 | 0 | 0 |
| <i>Thylogale_brunii</i>        | 0 | 0 | 0 | 0 |
| <i>Thylogale_calabyi</i>       | 0 | 0 | 0 | 0 |
| <i>Thylogale_stigmatica</i>    | 0 | 0 | 0 | 0 |
| <i>Thylogale_thetis</i>        | 0 | 0 | 0 | 0 |
| <i>Tlacuatzin_canescens</i>    | 0 | 0 | 0 | 0 |
| <i>Trichosurus_arnhemensis</i> | 0 | 0 | 0 | 0 |
| <i>Trichosurus_caninus</i>     | 0 | 0 | 0 | 0 |
| <i>Trichosurus_johnstonii</i>  | 0 | 0 | 0 | 0 |
| <i>Trichosurus_vulpecula</i>   | 0 | 0 | 0 | 0 |
| <i>Vombatus_ursinus</i>        | 0 | 0 | 0 | 0 |
| <i>Wallabia_bicolor</i>        | 0 | 0 | 0 | 0 |
| <i>Wyulda_squamicaudata</i>    | 0 | 0 | 0 | 0 |
| <b>Eutheria</b>                |   |   |   |   |
| <i>Abeomelomys_sevia</i>       | 0 | 0 | 0 | 0 |
| <i>Abrocoma_bennettii</i>      | 0 | 0 | 0 | 0 |
| <i>Abrocoma_cinerea</i>        | 0 | 0 | 0 | 0 |
| <i>Abrothrix_andinus</i>       | 0 | 0 | 0 | 0 |
| <i>Abrothrix_hershkovitzi</i>  | 0 | 0 | 0 | 0 |
| <i>Abrothrix_jelskii</i>       | 0 | 0 | 0 | 0 |
| <i>Abrothrix_lanosus</i>       | 0 | 0 | 0 | 0 |
| <i>Abrothrix_longipilis</i>    | 0 | 0 | 0 | 0 |
| <i>Abrothrix_markhami</i>      | 0 | 0 | 0 | 0 |
| <i>Abrothrix_olivaceus</i>     | 0 | 0 | 0 | 0 |
| <i>Acerodon_celebensis</i>     | 0 | 0 | 0 | 0 |
| <i>Acerodon_jubatus</i>        | 0 | 0 | 0 | 0 |
| <i>Acinonyx_jubatus</i>        | 0 | 0 | 0 | 0 |
| <i>Acomys_cahirinus</i>        | 0 | 0 | 0 | 0 |
| <i>Acomys_chudeaui</i>         | 0 | 0 | 0 | 0 |
| <i>Acomys_cilicicus</i>        | 0 | 0 | 0 | 0 |
| <i>Acomys_cineraceus</i>       | 0 | 0 | 0 | 0 |
| <i>Acomys_dimidiatus</i>       | 0 | 0 | 0 | 0 |

|                               |   |   |   |   |
|-------------------------------|---|---|---|---|
| <i>Acomys_ignitus</i>         | 0 | 0 | 0 | 0 |
| <i>Acomys_johannis</i>        | 0 | 0 | 0 | 0 |
| <i>Acomys_kempi</i>           | 0 | 0 | 0 | 0 |
| <i>Acomys_minous</i>          | 0 | 0 | 0 | 0 |
| <i>Acomys_nesiotes</i>        | 0 | 0 | 0 | 0 |
| <i>Acomys_percivali</i>       | 0 | 0 | 0 | 0 |
| <i>Acomys_russatus</i>        | 0 | 0 | 0 | 0 |
| <i>Acomys_spinosissimus</i>   | 0 | 0 | 0 | 0 |
| <i>Acomys_subspinosus</i>     | 0 | 0 | 0 | 0 |
| <i>Acomys_wilsoni</i>         | 0 | 0 | 0 | 0 |
| <i>Aconaemys_fuscus</i>       | 0 | 0 | 0 | 0 |
| <i>Aconaemys_porteri</i>      | 0 | 0 | 0 | 0 |
| <i>Aconaemys_sagei</i>        | 0 | 0 | 0 | 0 |
| <i>Addax_nasomaculatus</i>    | 0 | 0 | 0 | 0 |
| <i>Aegialomys_xanthaeolus</i> | 0 | 0 | 0 | 0 |
| <i>Aepeomys_lugens</i>        | 0 | 0 | 0 | 0 |
| <i>Aepyceros_melampus</i>     | 0 | 0 | 0 | 0 |
| <i>Aeretes_melanopterus</i>   | 0 | 0 | 0 | 0 |
| <i>Aeromys_tephromelas</i>    | 0 | 0 | 0 | 0 |
| <i>Aethalops_aequalis</i>     | 0 | 0 | 0 | 0 |
| <i>Aethalops_alecto</i>       | 0 | 0 | 0 | 0 |
| <i>Aethomys_chrysophilus</i>  | 0 | 0 | 0 | 0 |
| <i>Aethomys_ineptus</i>       | 0 | 0 | 0 | 0 |
| <i>Aethomys_kaiseri</i>       | 0 | 0 | 0 | 0 |
| <i>Ailuropoda_melanoleuca</i> | 0 | 0 | 0 | 0 |
| <i>Ailurus_fulgens</i>        | 0 | 0 | 0 | 0 |
| <i>Akodon_aerosus</i>         | 0 | 0 | 0 | 0 |
| <i>Akodon_affinis</i>         | 0 | 0 | 0 | 0 |
| <i>Akodon_albiventer</i>      | 0 | 0 | 0 | 0 |
| <i>Akodon_azarae</i>          | 0 | 0 | 0 | 0 |
| <i>Akodon_boliviensis</i>     | 0 | 0 | 0 | 0 |
| <i>Akodon_budini</i>          | 0 | 0 | 0 | 0 |
| <i>Akodon_cursor</i>          | 0 | 0 | 0 | 0 |
| <i>Akodon_dayi</i>            | 0 | 0 | 0 | 0 |
| <i>Akodon_dolores</i>         | 0 | 0 | 0 | 0 |
| <i>Akodon_fumeus</i>          | 0 | 0 | 0 | 0 |
| <i>Akodon_iniscatus</i>       | 0 | 0 | 0 | 0 |
| <i>Akodon_juninensis</i>      | 0 | 0 | 0 | 0 |
| <i>Akodon_kofordi</i>         | 0 | 0 | 0 | 0 |
| <i>Akodon_lindberghi</i>      | 0 | 0 | 0 | 0 |
| <i>Akodon_lutescens</i>       | 0 | 0 | 0 | 0 |
| <i>Akodon_mimus</i>           | 0 | 0 | 0 | 0 |
| <i>Akodon_molinae</i>         | 0 | 0 | 0 | 0 |
| <i>Akodon_mollis</i>          | 0 | 0 | 0 | 0 |

|                                    |   |   |   |   |
|------------------------------------|---|---|---|---|
| <i>Akodon_montensis</i>            | 0 | 0 | 0 | 0 |
| <i>Akodon_orophilus</i>            | 0 | 0 | 0 | 0 |
| <i>Akodon_serrensis</i>            | 0 | 0 | 0 | 0 |
| <i>Akodon_siberiae</i>             | 0 | 0 | 0 | 0 |
| <i>Akodon_simulator</i>            | 0 | 0 | 0 | 0 |
| <i>Akodon_spegazzinii</i>          | 0 | 0 | 0 | 0 |
| <i>Akodon_subfuscus</i>            | 0 | 0 | 0 | 0 |
| <i>Akodon_sylvanus</i>             | 0 | 0 | 0 | 0 |
| <i>Akodon_toba</i>                 | 0 | 0 | 0 | 0 |
| <i>Akodon_torques</i>              | 0 | 0 | 0 | 0 |
| <i>Akodon_varius</i>               | 0 | 0 | 0 | 0 |
| <i>Alcelaphus_buselaphus</i>       | 0 | 0 | 0 | 0 |
| <i>Alcelaphus_caama</i>            | 0 | 0 | 0 | 0 |
| <i>Alces_alces</i>                 | 0 | 0 | 0 | 0 |
| <i>Alces_americanus</i>            | 0 | 0 | 0 | 0 |
| <i>Alionycteris_paucidentata</i>   | 0 | 0 | 0 | 0 |
| <i>Allactaga_bullata</i>           | 0 | 0 | 0 | 0 |
| <i>Allactaga_elater</i>            | 0 | 0 | 0 | 0 |
| <i>Allactaga_major</i>             | 0 | 0 | 0 | 0 |
| <i>Allactaga_sibirica</i>          | 0 | 0 | 0 | 0 |
| <i>Allactodipus_bobriniskii</i>    | 0 | 0 | 0 | 0 |
| <i>Allenopithecus_nigroviridis</i> | 0 | 0 | 0 | 0 |
| <i>Allocebus_trichotis</i>         | 0 | 0 | 0 | 0 |
| <i>Allocricetulus_eversmanni</i>   | 0 | 0 | 0 | 0 |
| <i>Alouatta_belzebul</i>           | 0 | 0 | 0 | 0 |
| <i>Alouatta_caraya</i>             | 0 | 0 | 0 | 0 |
| <i>Alouatta_guariba</i>            | 0 | 0 | 0 | 0 |
| <i>Alouatta_palliata</i>           | 0 | 0 | 0 | 0 |
| <i>Alouatta_pigra</i>              | 0 | 0 | 0 | 0 |
| <i>Alouatta_sara</i>               | 0 | 0 | 0 | 0 |
| <i>Alouatta_seniculus</i>          | 0 | 0 | 0 | 0 |
| <i>Alticola_argentatus</i>         | 0 | 0 | 0 | 0 |
| <i>Alticola_barakshin</i>          | 0 | 0 | 0 | 0 |
| <i>Alticola_macrotis</i>           | 0 | 0 | 0 | 0 |
| <i>Alticola_semicanus</i>          | 0 | 0 | 0 | 0 |
| <i>Alticola_strelzowi</i>          | 0 | 0 | 0 | 0 |
| <i>Amblysomus_corriae</i>          | 0 | 0 | 0 | 0 |
| <i>Amblysomus_hottentotus</i>      | 0 | 0 | 0 | 0 |
| <i>Amblysomus_marleyi</i>          | 0 | 0 | 0 | 0 |
| <i>Amblysomus_septentrionalis</i>  | 0 | 0 | 0 | 0 |
| <i>Ametrida_centurio</i>           | 0 | 0 | 0 | 0 |
| <i>Ammospermophilus_harrisii</i>   | 0 | 0 | 0 | 0 |
| <i>Ammospermophilus_insularis</i>  | 0 | 0 | 0 | 0 |
| <i>Ammospermophilus_interpres</i>  | 0 | 0 | 0 | 0 |

|                                  |   |   |   |   |
|----------------------------------|---|---|---|---|
| <i>Ammospermophilus_leucurus</i> | 0 | 0 | 0 | 0 |
| <i>Ammotragus_lervia</i>         | 0 | 0 | 0 | 0 |
| <i>Amphinectomys_savamis</i>     | 0 | 0 | 0 | 0 |
| <i>Anathana_elliotti</i>         | 0 | 0 | 0 | 0 |
| <i>Andalgalomys_olrogi</i>       | 0 | 0 | 0 | 0 |
| <i>Andalgalomys_pearsoni</i>     | 0 | 0 | 0 | 0 |
| <i>Andinomys_edax</i>            | 0 | 0 | 0 | 0 |
| <i>Anisomys_imitator</i>         | 0 | 0 | 0 | 0 |
| <i>Anomalurus_beecrofti</i>      | 0 | 0 | 0 | 0 |
| <i>Anoura_caudifer</i>           | 0 | 0 | 0 | 0 |
| <i>Anoura_cultrata</i>           | 0 | 0 | 0 | 0 |
| <i>Anoura_geoffroyi</i>          | 0 | 0 | 0 | 0 |
| <i>Anoura_latidens</i>           | 0 | 0 | 0 | 0 |
| <i>Anourosorex_squamipes</i>     | 0 | 0 | 0 | 0 |
| <i>Anourosorex_yamashinai</i>    | 0 | 0 | 0 | 0 |
| <i>Anthops_ornatus</i>           | 0 | 0 | 0 | 0 |
| <i>Antidorcas_marsupialis</i>    | 0 | 0 | 0 | 0 |
| <i>Antilocapra_americana</i>     | 0 | 0 | 0 | 0 |
| <i>Antilope_cervicapra</i>       | 0 | 0 | 0 | 0 |
| <i>Antrozous_dubiaquercus</i>    | 0 | 0 | 0 | 0 |
| <i>Antrozous_pallidus</i>        | 0 | 0 | 0 | 0 |
| <i>Aonyx_capensis</i>            | 0 | 0 | 0 | 0 |
| <i>Aonyx_cinerea</i>             | 0 | 0 | 0 | 0 |
| <i>Aotus_azarai</i>              | 0 | 0 | 0 | 0 |
| <i>Aotus_brumbacki</i>           | 0 | 0 | 0 | 0 |
| <i>Aotus_griseimembra</i>        | 0 | 0 | 0 | 0 |
| <i>Aotus_lemurinus</i>           | 0 | 0 | 0 | 0 |
| <i>Aotus_nancymae</i>            | 0 | 0 | 0 | 0 |
| <i>Aotus_nigriceps</i>           | 0 | 0 | 0 | 0 |
| <i>Aotus_trivirgatus</i>         | 0 | 0 | 0 | 0 |
| <i>Aotus_vociferans</i>          | 0 | 0 | 0 | 0 |
| <i>Aplodontia_rufa</i>           | 0 | 0 | 0 | 0 |
| <i>Apodemus_agrarius</i>         | 0 | 0 | 0 | 0 |
| <i>Apodemus_alpicola</i>         | 0 | 0 | 0 | 0 |
| <i>Apodemus_argenteus</i>        | 0 | 0 | 0 | 0 |
| <i>Apodemus_chevrieri</i>        | 0 | 0 | 0 | 0 |
| <i>Apodemus_draco</i>            | 0 | 0 | 0 | 0 |
| <i>Apodemus_epimelas</i>         | 0 | 0 | 0 | 0 |
| <i>Apodemus_flavicollis</i>      | 0 | 0 | 0 | 0 |
| <i>Apodemus_gurkha</i>           | 0 | 0 | 0 | 0 |
| <i>Apodemus_hermonensis</i>      | 0 | 0 | 0 | 0 |
| <i>Apodemus_ilex</i>             | 0 | 0 | 0 | 0 |
| <i>Apodemus_latronum</i>         | 0 | 0 | 0 | 0 |
| <i>Apodemus_mystacinus</i>       | 0 | 0 | 0 | 0 |

|                                    |   |   |   |   |
|------------------------------------|---|---|---|---|
| <i>Apodemus_pallipes</i>           | 0 | 0 | 0 | 0 |
| <i>Apodemus_peninsulae</i>         | 0 | 0 | 0 | 0 |
| <i>Apodemus_ponticus</i>           | 0 | 0 | 0 | 0 |
| <i>Apodemus_semotus</i>            | 0 | 0 | 0 | 0 |
| <i>Apodemus_speciosus</i>          | 0 | 0 | 0 | 0 |
| <i>Apodemus_sylvaticus</i>         | 0 | 0 | 0 | 0 |
| <i>Apodemus_uralensis</i>          | 0 | 0 | 0 | 0 |
| <i>Apodemus_wardi</i>              | 0 | 0 | 0 | 0 |
| <i>Apodemus_witherbyi</i>          | 0 | 0 | 0 | 0 |
| <i>Apomys_abrae</i>                | 0 | 0 | 0 | 0 |
| <i>Apomys_datae</i>                | 0 | 0 | 0 | 0 |
| <i>Apomys_insignis</i>             | 0 | 0 | 0 | 0 |
| <i>Apomys_microdon</i>             | 0 | 0 | 0 | 0 |
| <i>Apomys_musculus</i>             | 0 | 0 | 0 | 0 |
| <i>Aproteles_bulmerae</i>          | 0 | 0 | 0 | 0 |
| <i>Arborimus_albipes</i>           | 0 | 0 | 0 | 0 |
| <i>Arborimus_longicaudus</i>       | 0 | 0 | 0 | 0 |
| <i>Arborimus_pomo</i>              | 0 | 0 | 0 | 0 |
| <i>Archboldomys_luzonensis</i>     | 0 | 0 | 0 | 0 |
| <i>Arctictis_binturong</i>         | 0 | 0 | 0 | 0 |
| <i>Arctocebus_aureus</i>           | 0 | 0 | 0 | 0 |
| <i>Arctocebus_calabarensis</i>     | 0 | 0 | 0 | 0 |
| <i>Arctocephalus_australis</i>     | 0 | 0 | 0 | 0 |
| <i>Arctocephalus_forsteri</i>      | 0 | 0 | 0 | 0 |
| <i>Arctocephalus_galapagoensis</i> | 0 | 0 | 0 | 0 |
| <i>Arctocephalus_gazella</i>       | 0 | 0 | 0 | 0 |
| <i>Arctocephalus_philippii</i>     | 0 | 0 | 0 | 0 |
| <i>Arctocephalus_pusillus</i>      | 0 | 0 | 0 | 0 |
| <i>Arctocephalus_townsendi</i>     | 0 | 0 | 0 | 0 |
| <i>Arctocephalus_tropicalis</i>    | 0 | 0 | 0 | 0 |
| <i>Arctodus_simus</i>              | 0 | 0 | 0 | 0 |
| <i>Arctogalidia_trivirgata</i>     | 0 | 0 | 0 | 0 |
| <i>Arctonyx_collaris</i>           | 0 | 0 | 0 | 0 |
| <i>Ardops_nicholli</i>             | 0 | 0 | 0 | 0 |
| <i>Arielulus_circumdatius</i>      | 0 | 0 | 0 | 0 |
| <i>Arielulus_cuprosus</i>          | 0 | 0 | 0 | 0 |
| <i>Ariteus_flavescens</i>          | 0 | 0 | 0 | 0 |
| <i>Artibeus_amplus</i>             | 0 | 0 | 0 | 0 |
| <i>Artibeus_anderseni</i>          | 0 | 0 | 0 | 0 |
| <i>Artibeus_aztecus</i>            | 0 | 0 | 0 | 0 |
| <i>Artibeus_cinereus</i>           | 0 | 0 | 0 | 0 |
| <i>Artibeus_concolor</i>           | 0 | 0 | 0 | 0 |
| <i>Artibeus_fimbriatus</i>         | 0 | 0 | 0 | 0 |
| <i>Artibeus_fratreculus</i>        | 0 | 0 | 0 | 0 |

|                                 |   |   |   |   |
|---------------------------------|---|---|---|---|
| <i>Artibeus_glaucus</i>         | 0 | 0 | 0 | 0 |
| <i>Artibeus_hartii</i>          | 0 | 0 | 0 | 0 |
| <i>Artibeus_hirsutus</i>        | 0 | 0 | 0 | 0 |
| <i>Artibeus_inopinatus</i>      | 0 | 0 | 0 | 0 |
| <i>Artibeus_jamaicensis</i>     | 0 | 0 | 0 | 0 |
| <i>Artibeus_lituratus</i>       | 0 | 0 | 0 | 0 |
| <i>Artibeus_obscurus</i>        | 0 | 0 | 0 | 0 |
| <i>Artibeus_phaeotis</i>        | 0 | 0 | 0 | 0 |
| <i>Artibeus_planirostris</i>    | 0 | 0 | 0 | 0 |
| <i>Artibeus_schwartzi</i>       | 0 | 0 | 0 | 0 |
| <i>Artibeus_toltecus</i>        | 0 | 0 | 0 | 0 |
| <i>Arvicanthis_abyssinicus</i>  | 0 | 0 | 0 | 0 |
| <i>Arvicanthis_ansorgei</i>     | 0 | 0 | 0 | 0 |
| <i>Arvicanthis_nairobae</i>     | 0 | 0 | 0 | 0 |
| <i>Arvicanthis_neumanni</i>     | 0 | 0 | 0 | 0 |
| <i>Arvicanthis_niloticus</i>    | 0 | 0 | 0 | 0 |
| <i>Arvicanthis_somalicus</i>    | 0 | 0 | 0 | 0 |
| <i>Arvicola_amphibius</i>       | 0 | 0 | 0 | 0 |
| <i>Arvicola_sapidus</i>         | 0 | 0 | 0 | 0 |
| <i>Asellia_tridens</i>          | 0 | 0 | 0 | 0 |
| <i>Aselliscus_stoliczkanus</i>  | 0 | 0 | 0 | 0 |
| <i>Aselliscus_tricuspidatus</i> | 0 | 0 | 0 | 0 |
| <i>Atelerix_albiventris</i>     | 0 | 0 | 0 | 0 |
| <i>Atelerix_algirus</i>         | 0 | 0 | 0 | 0 |
| <i>Ateles_belzebuth</i>         | 0 | 0 | 0 | 0 |
| <i>Ateles_fusciceps</i>         | 0 | 0 | 0 | 0 |
| <i>Ateles_geoffroyi</i>         | 0 | 0 | 0 | 0 |
| <i>Ateles_hybridus</i>          | 0 | 0 | 0 | 0 |
| <i>Ateles_paniscus</i>          | 0 | 0 | 0 | 0 |
| <i>Atelocynus_microtis</i>      | 0 | 0 | 0 | 0 |
| <i>Atherurus_africanus</i>      | 0 | 0 | 0 | 0 |
| <i>Atherurus_macrourus</i>      | 0 | 0 | 0 | 0 |
| <i>Atilax_paludinosus</i>       | 0 | 0 | 0 | 0 |
| <i>Atlantoxerus_getulus</i>     | 0 | 0 | 0 | 0 |
| <i>Auliscomys_boliviensis</i>   | 0 | 0 | 0 | 0 |
| <i>Auliscomys_micropus</i>      | 0 | 0 | 0 | 0 |
| <i>Auliscomys_pictus</i>        | 0 | 0 | 0 | 0 |
| <i>Auliscomys_sublimis</i>      | 0 | 0 | 0 | 0 |
| <i>Avahi_laniger</i>            | 0 | 0 | 0 | 0 |
| <i>Avahi_occidentalis</i>       | 0 | 0 | 0 | 0 |
| <i>Avahi_unicolor</i>           | 0 | 0 | 0 | 0 |
| <i>Axis_axis</i>                | 0 | 0 | 0 | 0 |
| <i>Axis_kuhlii</i>              | 0 | 0 | 0 | 0 |
| <i>Axis_porcinus</i>            | 0 | 0 | 0 | 0 |

|                                   |   |   |   |   |
|-----------------------------------|---|---|---|---|
| <i>Babyrousa_babyrussa</i>        | 0 | 0 | 0 | 0 |
| <i>Baiomys_musculus</i>           | 0 | 0 | 0 | 0 |
| <i>Baiomys_taylori</i>            | 0 | 0 | 0 | 0 |
| <i>Balaena_mysticetus</i>         | 0 | 0 | 0 | 0 |
| <i>Balaenoptera_acutorostrata</i> | 0 | 0 | 0 | 0 |
| <i>Balaenoptera_bonaerensis</i>   | 0 | 0 | 0 | 0 |
| <i>Balaenoptera_borealis</i>      | 0 | 0 | 0 | 0 |
| <i>Balaenoptera_brydei</i>        | 0 | 0 | 0 | 0 |
| <i>Balaenoptera_edeni</i>         | 0 | 0 | 0 | 0 |
| <i>Balaenoptera_musculus</i>      | 0 | 0 | 0 | 0 |
| <i>Balaenoptera_omurai</i>        | 0 | 0 | 0 | 0 |
| <i>Balaenoptera_physalus</i>      | 0 | 0 | 0 | 0 |
| <i>Balantiopteryx_infusca</i>     | 0 | 0 | 0 | 0 |
| <i>Balantiopteryx_io</i>          | 0 | 0 | 0 | 0 |
| <i>Balantiopteryx_plicata</i>     | 0 | 0 | 0 | 0 |
| <i>Balionycteris_maculata</i>     | 0 | 0 | 0 | 0 |
| <i>Bandicota_bengalensis</i>      | 0 | 0 | 0 | 0 |
| <i>Bandicota_indica</i>           | 0 | 0 | 0 | 0 |
| <i>Bandicota_savilei</i>          | 0 | 0 | 0 | 0 |
| <i>Barbastella_barbastellus</i>   | 0 | 0 | 0 | 0 |
| <i>Barbastella_leucomelas</i>     | 0 | 0 | 0 | 0 |
| <i>Bassaricyon_alleni</i>         | 0 | 0 | 0 | 0 |
| <i>Bassaricyon_beddardi</i>       | 0 | 0 | 0 | 0 |
| <i>Bassaricyon_gabbii</i>         | 0 | 0 | 0 | 0 |
| <i>Bassariscus_astutus</i>        | 0 | 0 | 0 | 0 |
| <i>Bassariscus_sumichrasti</i>    | 0 | 0 | 0 | 0 |
| <i>Bathyergus_janetta</i>         | 0 | 0 | 0 | 0 |
| <i>Bathyergus_suillus</i>         | 0 | 0 | 0 | 0 |
| <i>Batomys_granti</i>             | 0 | 0 | 0 | 0 |
| <i>Batomys_salomonseni</i>        | 0 | 0 | 0 | 0 |
| <i>Bdeogale_crassicauda</i>       | 0 | 0 | 0 | 0 |
| <i>Bdeogale_nigripes</i>          | 0 | 0 | 0 | 0 |
| <i>Beamys_hindei</i>              | 0 | 0 | 0 | 0 |
| <i>Beatragus_hunteri</i>          | 0 | 0 | 0 | 0 |
| <i>Belomys_pearsonii</i>          | 0 | 0 | 0 | 0 |
| <i>Berardius_arnuxii</i>          | 0 | 0 | 0 | 0 |
| <i>Berardius_bairdii</i>          | 0 | 0 | 0 | 0 |
| <i>Berylmys_berdmorei</i>         | 0 | 0 | 0 | 0 |
| <i>Berylmys_bowersi</i>           | 0 | 0 | 0 | 0 |
| <i>Bibimys_chacoensis</i>         | 0 | 0 | 0 | 0 |
| <i>Bibimys_labiosus</i>           | 0 | 0 | 0 | 0 |
| <i>Bison_bison</i>                | 0 | 0 | 0 | 0 |
| <i>Bison_bonassus</i>             | 0 | 0 | 0 | 0 |
| <i>Blanfordimys_afghanus</i>      | 0 | 0 | 0 | 0 |

|                                   |   |   |   |   |
|-----------------------------------|---|---|---|---|
| <i>Blanfordimys_bucharensis</i>   | 0 | 0 | 0 | 0 |
| <i>Blarina_brevicauda</i>         | 0 | 0 | 0 | 0 |
| <i>Blarina_carolinensis</i>       | 0 | 0 | 0 | 0 |
| <i>Blarina_hylophaga</i>          | 0 | 0 | 0 | 0 |
| <i>Blarinella_griselda</i>        | 0 | 0 | 0 | 0 |
| <i>Blarinomys_breviceps</i>       | 0 | 0 | 0 | 0 |
| <i>Blastocerus_dichotomus</i>     | 0 | 0 | 0 | 0 |
| <i>Bolomys_amoenus</i>            | 0 | 0 | 0 | 0 |
| <i>Bolomys_lasiurus</i>           | 0 | 0 | 0 | 0 |
| <i>Bolomys_temchuki</i>           | 0 | 0 | 0 | 0 |
| <i>Bolomys_urichi</i>             | 0 | 0 | 0 | 0 |
| <i>Bos_frontalis</i>              | 0 | 0 | 0 | 0 |
| <i>Bos_grunniens</i>              | 0 | 0 | 0 | 0 |
| <i>Bos_indicus</i>                | 0 | 0 | 0 | 0 |
| <i>Bos_javanicus</i>              | 0 | 0 | 0 | 0 |
| <i>Bos_primigenius</i>            | 0 | 0 | 0 | 0 |
| <i>Bos_sauveli</i>                | 0 | 0 | 0 | 0 |
| <i>Bos_taurus</i>                 | 0 | 0 | 0 | 0 |
| <i>Boselaphus_tragocamelus</i>    | 0 | 0 | 0 | 0 |
| <i>Brachiones_przewalskii</i>     | 0 | 0 | 0 | 0 |
| <i>Brachylagus_idahoensis</i>     | 0 | 0 | 0 | 0 |
| <i>Brachyphylla_cavernarum</i>    | 0 | 0 | 0 | 0 |
| <i>Brachyphylla_nana</i>          | 0 | 0 | 0 | 0 |
| <i>Brachytarsomys_albicauda</i>   | 0 | 0 | 0 | 0 |
| <i>Brachyteles_arachnoides</i>    | 0 | 0 | 0 | 0 |
| <i>Brachyteles_hypoxanthus</i>    | 0 | 0 | 0 | 0 |
| <i>Brachyuromys_betsileoensis</i> | 0 | 0 | 0 | 0 |
| <i>Brachyuromys_ramirohitra</i>   | 0 | 0 | 0 | 0 |
| <i>Bradypus_torquatus</i>         | 0 | 0 | 0 | 0 |
| <i>Bradypus_tridactylus</i>       | 0 | 0 | 0 | 0 |
| <i>Bradypus_variegatus</i>        | 0 | 0 | 0 | 0 |
| <i>Bubalus_bubalis</i>            | 0 | 0 | 0 | 0 |
| <i>Bubalus_carabanensis</i>       | 0 | 0 | 0 | 0 |
| <i>Bubalus_depressicornis</i>     | 0 | 0 | 0 | 0 |
| <i>Bubalus_mindorensis</i>        | 0 | 0 | 0 | 0 |
| <i>Bubalus_quarlesi</i>           | 0 | 0 | 0 | 0 |
| <i>Budorcas_taxicolor</i>         | 0 | 0 | 0 | 0 |
| <i>Bullimus_bagobus</i>           | 0 | 0 | 0 | 0 |
| <i>Bullimus_luzonicus</i>         | 0 | 0 | 0 | 0 |
| <i>Bunolagus_monticularis</i>     | 0 | 0 | 0 | 0 |
| <i>Bunomys_andrewsi</i>           | 0 | 0 | 0 | 0 |
| <i>Bunomys_chrysocomus</i>        | 0 | 0 | 0 | 0 |
| <i>Cabassous_unicinctus</i>       | 0 | 0 | 0 | 0 |
| <i>Cacajao_calvus</i>             | 0 | 0 | 0 | 0 |



|                                    |   |   |   |   |
|------------------------------------|---|---|---|---|
| <i>Cacajao_melanocephalus</i>      | 0 | 0 | 0 | 0 |
| <i>Calcochloris_obtusirostris</i>  | 0 | 0 | 0 | 0 |
| <i>Callicebus_brunneus</i>         | 0 | 0 | 0 | 0 |
| <i>Callicebus_caligatus</i>        | 0 | 0 | 0 | 0 |
| <i>Callicebus_coimbrai</i>         | 0 | 0 | 0 | 0 |
| <i>Callicebus_cupreus</i>          | 0 | 0 | 0 | 0 |
| <i>Callicebus_donacophilus</i>     | 0 | 0 | 0 | 0 |
| <i>Callicebus_hoffmannsi</i>       | 0 | 0 | 0 | 0 |
| <i>Callicebus_lugens</i>           | 0 | 0 | 0 | 0 |
| <i>Callicebus_moloch</i>           | 0 | 0 | 0 | 0 |
| <i>Callicebus_nigrifrons</i>       | 0 | 0 | 0 | 0 |
| <i>Callicebus_personatus</i>       | 0 | 0 | 0 | 0 |
| <i>Callicebus_torquatus</i>        | 0 | 0 | 0 | 0 |
| <i>Callimico_goeldii</i>           | 0 | 0 | 0 | 0 |
| <i>Callithrix_argentata</i>        | 0 | 0 | 0 | 0 |
| <i>Callithrix_aurita</i>           | 0 | 0 | 0 | 0 |
| <i>Callithrix_emiliae</i>          | 0 | 0 | 0 | 0 |
| <i>Callithrix_geoffroyi</i>        | 0 | 0 | 0 | 0 |
| <i>Callithrix_humeralifera</i>     | 0 | 0 | 0 | 0 |
| <i>Callithrix_humilis</i>          | 0 | 0 | 0 | 0 |
| <i>Callithrix_jacchus</i>          | 0 | 0 | 0 | 0 |
| <i>Callithrix_kuhlii</i>           | 0 | 0 | 0 | 0 |
| <i>Callithrix_mauesi</i>           | 0 | 0 | 0 | 0 |
| <i>Callithrix_melanura</i>         | 0 | 0 | 0 | 0 |
| <i>Callithrix_penicillata</i>      | 0 | 0 | 0 | 0 |
| <i>Callithrix_pygmaea</i>          | 0 | 0 | 0 | 0 |
| <i>Callithrix_rondoni</i>          | 0 | 0 | 0 | 0 |
| <i>Callithrix_saterei</i>          | 0 | 0 | 0 | 0 |
| <i>Callorhinus_ursinus</i>         | 0 | 0 | 0 | 0 |
| <i>Callosciurus_caniceps</i>       | 0 | 0 | 0 | 0 |
| <i>Callosciurus_finlaysonii</i>    | 0 | 0 | 0 | 0 |
| <i>Callosciurus_nigrovittatus</i>  | 0 | 0 | 0 | 0 |
| <i>Callosciurus_notatus</i>        | 0 | 0 | 0 | 0 |
| <i>Callosciurus_orestes</i>        | 0 | 0 | 0 | 0 |
| <i>Callosciurus_prevostii</i>      | 0 | 0 | 0 | 0 |
| <i>Callospermophilus_lateralis</i> | 0 | 0 | 0 | 0 |
| <i>Callospermophilus_madrensis</i> | 0 | 0 | 0 | 0 |
| <i>Callospermophilus_saturatus</i> | 0 | 0 | 0 | 0 |
| <i>Calomys_callidus</i>            | 0 | 0 | 0 | 0 |
| <i>Calomys_callosus</i>            | 0 | 0 | 0 | 0 |
| <i>Calomys_expulsus</i>            | 0 | 0 | 0 | 0 |
| <i>Calomys_fecundus</i>            | 0 | 0 | 0 | 0 |
| <i>Calomys_hummelincki</i>         | 0 | 0 | 0 | 0 |
| <i>Calomys_laucha</i>              | 0 | 0 | 0 | 0 |

|                                 |   |   |   |   |
|---------------------------------|---|---|---|---|
| <i>Calomys_lepidus</i>          | 0 | 0 | 0 | 0 |
| <i>Calomys_musculus</i>         | 0 | 0 | 0 | 0 |
| <i>Calomys_sorellus</i>         | 0 | 0 | 0 | 0 |
| <i>Calomys_sp.</i>              | 0 | 0 | 0 | 0 |
| <i>Calomys_sp._CEG40</i>        | 0 | 0 | 0 | 0 |
| <i>Calomys_tener</i>            | 0 | 0 | 0 | 0 |
| <i>Calomys_tocantinsi</i>       | 0 | 0 | 0 | 0 |
| <i>Calomys_venustus</i>         | 0 | 0 | 0 | 0 |
| <i>Calomyscus_bailwardi</i>     | 0 | 0 | 0 | 0 |
| <i>Calomyscus_baluchi</i>       | 0 | 0 | 0 | 0 |
| <i>Calomyscus_hotsoni</i>       | 0 | 0 | 0 | 0 |
| <i>Calomyscus_mystax</i>        | 0 | 0 | 0 | 0 |
| <i>Calyptophractus_retusus</i>  | 0 | 0 | 0 | 0 |
| <i>Camelus_bactrianus</i>       | 0 | 0 | 0 | 0 |
| <i>Camelus_dromedarius</i>      | 0 | 0 | 0 | 0 |
| <i>Camelus_ferus</i>            | 0 | 0 | 0 | 0 |
| <i>Canis_adustus</i>            | 0 | 0 | 0 | 0 |
| <i>Canis_aureus</i>             | 0 | 0 | 0 | 0 |
| <i>Canis_latrans</i>            | 0 | 0 | 0 | 0 |
| <i>Canis_lupus</i>              | 0 | 0 | 0 | 0 |
| <i>Canis_mesomelas</i>          | 0 | 0 | 0 | 0 |
| <i>Canis_simensis</i>           | 0 | 0 | 0 | 0 |
| <i>Caperea_marginata</i>        | 0 | 0 | 0 | 0 |
| <i>Capra_aegagrus</i>           | 0 | 0 | 0 | 0 |
| <i>Capra_caucasica</i>          | 0 | 0 | 0 | 0 |
| <i>Capra_cylindricornis</i>     | 0 | 0 | 0 | 0 |
| <i>Capra_falconeri</i>          | 0 | 0 | 0 | 0 |
| <i>Capra_hircus</i>             | 0 | 0 | 0 | 0 |
| <i>Capra_ibex</i>               | 0 | 0 | 0 | 0 |
| <i>Capra_nubiana</i>            | 0 | 0 | 0 | 0 |
| <i>Capra_pyrenaica</i>          | 0 | 0 | 0 | 0 |
| <i>Capra_sibirica</i>           | 0 | 0 | 0 | 0 |
| <i>Capra_walie</i>              | 0 | 0 | 0 | 0 |
| <i>Capreolus_capreolus</i>      | 0 | 0 | 0 | 0 |
| <i>Capreolus_pygargus</i>       | 0 | 0 | 0 | 0 |
| <i>Capricornis_crispus</i>      | 0 | 0 | 0 | 0 |
| <i>Capricornis_sumatraensis</i> | 0 | 0 | 0 | 0 |
| <i>Capricornis_swinhoei</i>     | 0 | 0 | 0 | 0 |
| <i>Caprolagus_hispidus</i>      | 0 | 0 | 0 | 0 |
| <i>Capromys_pilorides</i>       | 0 | 0 | 0 | 0 |
| <i>Caracal_caracal</i>          | 0 | 0 | 0 | 0 |
| <i>Cardioderma_cor</i>          | 0 | 0 | 0 | 0 |
| <i>Carollia_brevicauda</i>      | 0 | 0 | 0 | 0 |
| <i>Carollia_castanea</i>        | 0 | 0 | 0 | 0 |

|                                    |   |   |   |   |
|------------------------------------|---|---|---|---|
| <i>Carollia_perspicillata</i>      | 0 | 0 | 0 | 0 |
| <i>Carollia_subrufa</i>            | 0 | 0 | 0 | 0 |
| <i>Carpitalpa_arendsi</i>          | 0 | 0 | 0 | 0 |
| <i>Carpomys_phaeurus</i>           | 0 | 0 | 0 | 0 |
| <i>Casinycteris_argynnis</i>       | 0 | 0 | 0 | 0 |
| <i>Castor_canadensis</i>           | 0 | 0 | 0 | 0 |
| <i>Castor_fiber</i>                | 0 | 0 | 0 | 0 |
| <i>Catagonus_wagneri</i>           | 0 | 0 | 0 | 0 |
| <i>Catopuma_badia</i>              | 0 | 0 | 0 | 0 |
| <i>Catopuma_temminckii</i>         | 0 | 0 | 0 | 0 |
| <i>Cavia_aperea</i>                | 0 | 0 | 0 | 0 |
| <i>Cavia_fulgida</i>               | 0 | 0 | 0 | 0 |
| <i>Cavia_magna</i>                 | 0 | 0 | 0 | 0 |
| <i>Cavia_patzelti</i>              | 0 | 0 | 0 | 0 |
| <i>Cavia_porcellus</i>             | 0 | 0 | 0 | 0 |
| <i>Cavia_tschudii</i>              | 0 | 0 | 0 | 0 |
| <i>Cebus_albifrons</i>             | 0 | 0 | 0 | 0 |
| <i>Cebus_apella</i>                | 0 | 0 | 0 | 0 |
| <i>Cebus_capucinus</i>             | 0 | 0 | 0 | 0 |
| <i>Cebus_cay</i>                   | 0 | 0 | 0 | 0 |
| <i>Cebus_kaapori</i>               | 0 | 0 | 0 | 0 |
| <i>Cebus_libidinosus</i>           | 0 | 0 | 0 | 0 |
| <i>Cebus_nigritus</i>              | 0 | 0 | 0 | 0 |
| <i>Cebus_olivaceus</i>             | 0 | 0 | 0 | 0 |
| <i>Cebus_xanthosternos</i>         | 0 | 0 | 0 | 0 |
| <i>Centronycteris_centralis</i>    | 0 | 0 | 0 | 0 |
| <i>Centronycteris_maximiliani</i>  | 0 | 0 | 0 | 0 |
| <i>Centurio_senex</i>              | 0 | 0 | 0 | 0 |
| <i>Cephalophus_adersi</i>          | 0 | 0 | 0 | 0 |
| <i>Cephalophus_callipygus</i>      | 0 | 0 | 0 | 0 |
| <i>Cephalophus_dorsalis</i>        | 0 | 0 | 0 | 0 |
| <i>Cephalophus_harveyi</i>         | 0 | 0 | 0 | 0 |
| <i>Cephalophus_jentinki</i>        | 0 | 0 | 0 | 0 |
| <i>Cephalophus_leucogaster</i>     | 0 | 0 | 0 | 0 |
| <i>Cephalophus_natalensis</i>      | 0 | 0 | 0 | 0 |
| <i>Cephalophus_niger</i>           | 0 | 0 | 0 | 0 |
| <i>Cephalophus_nigrifrons</i>      | 0 | 0 | 0 | 0 |
| <i>Cephalophus_ogilbyi</i>         | 0 | 0 | 0 | 0 |
| <i>Cephalophus_rufilatus</i>       | 0 | 0 | 0 | 0 |
| <i>Cephalophus_silvicultor</i>     | 0 | 0 | 0 | 0 |
| <i>Cephalophus_spadix</i>          | 0 | 0 | 0 | 0 |
| <i>Cephalophus_weynsi</i>          | 0 | 0 | 0 | 0 |
| <i>Cephalophus_zebra</i>           | 0 | 0 | 0 | 0 |
| <i>Cephalorhynchus_commersonii</i> | 0 | 0 | 0 | 0 |

|                                    |   |   |   |   |
|------------------------------------|---|---|---|---|
| <i>Cephalorhynchus_eutropia</i>    | 0 | 0 | 0 | 0 |
| <i>Cephalorhynchus_heavisidii</i>  | 0 | 0 | 0 | 0 |
| <i>Cephalorhynchus_hectori</i>     | 0 | 0 | 0 | 0 |
| <i>Ceratotherium_simum</i>         | 0 | 0 | 0 | 0 |
| <i>Cercocebus_agilis</i>           | 0 | 0 | 0 | 0 |
| <i>Cercocebus_atys</i>             | 0 | 0 | 0 | 0 |
| <i>Cercocebus_chrysogaster</i>     | 0 | 0 | 0 | 0 |
| <i>Cercocebus_galeritus</i>        | 0 | 0 | 0 | 0 |
| <i>Cercocebus_torquatus</i>        | 0 | 0 | 0 | 0 |
| <i>Cercopithecus_albogularis</i>   | 0 | 0 | 0 | 0 |
| <i>Cercopithecus_ascanius</i>      | 0 | 0 | 0 | 0 |
| <i>Cercopithecus_campbelli</i>     | 0 | 0 | 0 | 0 |
| <i>Cercopithecus_cephus</i>        | 0 | 0 | 0 | 0 |
| <i>Cercopithecus_diana</i>         | 0 | 0 | 0 | 0 |
| <i>Cercopithecus_erythrogaster</i> | 0 | 0 | 0 | 0 |
| <i>Cercopithecus_erythrotis</i>    | 0 | 0 | 0 | 0 |
| <i>Cercopithecus_hamlyni</i>       | 0 | 0 | 0 | 0 |
| <i>Cercopithecus_lhoesti</i>       | 0 | 0 | 0 | 0 |
| <i>Cercopithecus_mitis</i>         | 0 | 0 | 0 | 0 |
| <i>Cercopithecus_mona</i>          | 0 | 0 | 0 | 0 |
| <i>Cercopithecus_neglectus</i>     | 0 | 0 | 0 | 0 |
| <i>Cercopithecus_nictitans</i>     | 0 | 0 | 0 | 0 |
| <i>Cercopithecus_petaurista</i>    | 0 | 0 | 0 | 0 |
| <i>Cercopithecus_pogonias</i>      | 0 | 0 | 0 | 0 |
| <i>Cercopithecus_preussi</i>       | 0 | 0 | 0 | 0 |
| <i>Cercopithecus_roloway</i>       | 0 | 0 | 0 | 0 |
| <i>Cercopithecus_solatus</i>       | 0 | 0 | 0 | 0 |
| <i>Cercopithecus_wolffi</i>        | 0 | 0 | 0 | 0 |
| <i>Cerdocyon_thous</i>             | 0 | 0 | 0 | 0 |
| <i>Cerradomys_subflavus</i>        | 0 | 0 | 0 | 0 |
| <i>Cervus_elaphus</i>              | 0 | 0 | 0 | 0 |
| <i>Cervus_hortulorum</i>           | 0 | 0 | 0 | 0 |
| <i>Cervus_nippon</i>               | 0 | 0 | 0 | 0 |
| <i>Cervus_taiouanus</i>            | 0 | 0 | 0 | 0 |
| <i>Cervus_yesoensis</i>            | 0 | 0 | 0 | 0 |
| <i>Chaerephon_ansorgei</i>         | 0 | 0 | 0 | 0 |
| <i>Chaerephon_chapini</i>          | 0 | 0 | 0 | 0 |
| <i>Chaerephon_jobensis</i>         | 0 | 0 | 0 | 0 |
| <i>Chaerephon_leucogaster</i>      | 0 | 0 | 0 | 0 |
| <i>Chaerephon_nigeriae</i>         | 0 | 0 | 0 | 0 |
| <i>Chaerephon_plicatus</i>         | 0 | 0 | 0 | 0 |
| <i>Chaerephon_pumilus</i>          | 0 | 0 | 0 | 0 |
| <i>Chaetodipus_arenarius</i>       | 0 | 0 | 0 | 0 |
| <i>Chaetodipus_artus</i>           | 0 | 0 | 0 | 0 |

|                                  |   |   |   |   |
|----------------------------------|---|---|---|---|
| <i>Chaetodipus_baileyi</i>       | 0 | 0 | 0 | 0 |
| <i>Chaetodipus_californicus</i>  | 0 | 0 | 0 | 0 |
| <i>Chaetodipus_dalquesti</i>     | 0 | 0 | 0 | 0 |
| <i>Chaetodipus_eremicus</i>      | 0 | 0 | 0 | 0 |
| <i>Chaetodipus_fallax</i>        | 0 | 0 | 0 | 0 |
| <i>Chaetodipus_formosus</i>      | 0 | 0 | 0 | 0 |
| <i>Chaetodipus_goldmani</i>      | 0 | 0 | 0 | 0 |
| <i>Chaetodipus_hispidus</i>      | 0 | 0 | 0 | 0 |
| <i>Chaetodipus_intermedius</i>   | 0 | 0 | 0 | 0 |
| <i>Chaetodipus_nelsoni</i>       | 0 | 0 | 0 | 0 |
| <i>Chaetodipus_penicillatus</i>  | 0 | 0 | 0 | 0 |
| <i>Chaetodipus_pernix</i>        | 0 | 0 | 0 | 0 |
| <i>Chaetodipus_rudinoris</i>     | 0 | 0 | 0 | 0 |
| <i>Chaetodipus_spinatus</i>      | 0 | 0 | 0 | 0 |
| <i>Chaetomys_subspinosus</i>     | 0 | 0 | 0 | 0 |
| <i>Chaetophractus_vellerosus</i> | 0 | 0 | 0 | 0 |
| <i>Chaetophractus_villosus</i>   | 0 | 0 | 0 | 0 |
| <i>Chalinolobus_argentatus</i>   | 0 | 0 | 0 | 0 |
| <i>Chalinolobus_beatrix</i>      | 0 | 0 | 0 | 0 |
| <i>Chalinolobus_gouldii</i>      | 0 | 0 | 0 | 0 |
| <i>Chalinolobus_morio</i>        | 0 | 0 | 0 | 0 |
| <i>Chalinolobus_nigrogriseus</i> | 0 | 0 | 0 | 0 |
| <i>Chalinolobus_poensis</i>      | 0 | 0 | 0 | 0 |
| <i>Chalinolobus_tuberculatus</i> | 0 | 0 | 0 | 0 |
| <i>Chalinolobus_variegatus</i>   | 0 | 0 | 0 | 0 |
| <i>Cheirogaleus_crossleyi</i>    | 0 | 0 | 0 | 0 |
| <i>Cheirogaleus_major</i>        | 0 | 0 | 0 | 0 |
| <i>Cheirogaleus_medius</i>       | 0 | 0 | 0 | 0 |
| <i>Cheirogaleus_sibreei</i>      | 0 | 0 | 0 | 0 |
| <i>Cheiromeles_parvidens</i>     | 0 | 0 | 0 | 0 |
| <i>Chelemys_macronyx</i>         | 0 | 0 | 0 | 0 |
| <i>Chelemys_megalonyx</i>        | 0 | 0 | 0 | 0 |
| <i>Chilomys_instans</i>          | 0 | 0 | 0 | 0 |
| <i>Chilonatalus_micropus</i>     | 0 | 0 | 0 | 0 |
| <i>Chilonatalus_tumidifrons</i>  | 0 | 0 | 0 | 0 |
| <i>Chimarrogale_himalayica</i>   | 0 | 0 | 0 | 0 |
| <i>Chimarrogale_phaeura</i>      | 0 | 0 | 0 | 0 |
| <i>Chimarrogale_platycephala</i> | 0 | 0 | 0 | 0 |
| <i>Chinchilla_lanigera</i>       | 0 | 0 | 0 | 0 |
| <i>Chionomys_gud</i>             | 0 | 0 | 0 | 0 |
| <i>Chionomys_nivalis</i>         | 0 | 0 | 0 | 0 |
| <i>Chionomys_roberti</i>         | 0 | 0 | 0 | 0 |
| <i>Chiroderma_doriae</i>         | 0 | 0 | 0 | 0 |
| <i>Chiroderma_improvisum</i>     | 0 | 0 | 0 | 0 |

|                                 |   |   |   |   |
|---------------------------------|---|---|---|---|
| <i>Chiroderma_salvini</i>       | 0 | 0 | 0 | 0 |
| <i>Chiroderma_trinitatum</i>    | 0 | 0 | 0 | 0 |
| <i>Chiroderma_villosum</i>      | 0 | 0 | 0 | 0 |
| <i>Chiromyscus_chiropus</i>     | 0 | 0 | 0 | 0 |
| <i>Chironax_melanocephalus</i>  | 0 | 0 | 0 | 0 |
| <i>Chiropodomys_gliroides</i>   | 0 | 0 | 0 | 0 |
| <i>Chiropotes_albinasus</i>     | 0 | 0 | 0 | 0 |
| <i>Chiropotes_chiropotes</i>    | 0 | 0 | 0 | 0 |
| <i>Chiropotes_israelita</i>     | 0 | 0 | 0 | 0 |
| <i>Chiropotes_satanas</i>       | 0 | 0 | 0 | 0 |
| <i>Chiruromys_vates</i>         | 0 | 0 | 0 | 0 |
| <i>Chlamyphorus_truncatus</i>   | 0 | 0 | 0 | 0 |
| <i>Chlorocebus_aethiops</i>     | 0 | 0 | 0 | 0 |
| <i>Chlorocebus_cynosuros</i>    | 0 | 0 | 0 | 0 |
| <i>Chlorocebus_pygerythrus</i>  | 0 | 0 | 0 | 0 |
| <i>Chlorocebus_sabaeus</i>      | 0 | 0 | 0 | 0 |
| <i>Chlorocebus_tantalus</i>     | 0 | 0 | 0 | 0 |
| <i>Chlorotalpa_duthieae</i>     | 0 | 0 | 0 | 0 |
| <i>Chlorotalpa_sclateri</i>     | 0 | 0 | 0 | 0 |
| <i>Chodsigoa_hypsibia</i>       | 0 | 0 | 0 | 0 |
| <i>Chodsigoa_parca</i>          | 0 | 0 | 0 | 0 |
| <i>Chodsigoa_sodalis</i>        | 0 | 0 | 0 | 0 |
| <i>Choeroniscus_godmani</i>     | 0 | 0 | 0 | 0 |
| <i>Choeroniscus_minor</i>       | 0 | 0 | 0 | 0 |
| <i>Choeronycteris_mexicana</i>  | 0 | 0 | 0 | 0 |
| <i>Choloepus_didactylus</i>     | 0 | 0 | 0 | 0 |
| <i>Choloepus_hoffmanni</i>      | 0 | 0 | 0 | 0 |
| <i>Chrotogale_owstoni</i>       | 0 | 0 | 0 | 0 |
| <i>Chrotomys_gonzalesi</i>      | 0 | 0 | 0 | 0 |
| <i>Chrotomys_silaceus</i>       | 0 | 0 | 0 | 0 |
| <i>Chrotomys_whiteheadi</i>     | 0 | 0 | 0 | 0 |
| <i>Chrotopterus_auritus</i>     | 0 | 0 | 0 | 0 |
| <i>Chrysochloris_asiatica</i>   | 0 | 0 | 0 | 0 |
| <i>Chrysochloris_stuhlmanni</i> | 0 | 0 | 0 | 0 |
| <i>Chrysocyon_brachyurus</i>    | 0 | 0 | 0 | 0 |
| <i>Chrysospalax_trevelyani</i>  | 0 | 0 | 0 | 0 |
| <i>Chrysospalax_villosus</i>    | 0 | 0 | 0 | 0 |
| <i>Cistugo_lesueuri</i>         | 0 | 0 | 0 | 0 |
| <i>Cistugo_seabrae</i>          | 0 | 0 | 0 | 0 |
| <i>Civettictis_civetta</i>      | 0 | 0 | 0 | 0 |
| <i>Cloeotis_percivali</i>       | 0 | 0 | 0 | 0 |
| <i>Clyomys_laticeps</i>         | 0 | 0 | 0 | 0 |
| <i>Coccymys_ruemmleri</i>       | 0 | 0 | 0 | 0 |
| <i>Coelodonta_antiquitatis</i>  | 0 | 0 | 0 | 0 |

|                                    |   |   |   |   |
|------------------------------------|---|---|---|---|
| <i>Coelops_frithii</i>             | 0 | 0 | 0 | 0 |
| <i>Coelops_robinsoni</i>           | 0 | 0 | 0 | 0 |
| <i>Coendou_bicolor</i>             | 0 | 0 | 0 | 0 |
| <i>Coendou_insidiosus</i>          | 0 | 0 | 0 | 0 |
| <i>Coendou_melanurus</i>           | 0 | 0 | 0 | 0 |
| <i>Coendou_mexicanus</i>           | 0 | 0 | 0 | 0 |
| <i>Coendou_prehensilis</i>         | 0 | 0 | 0 | 0 |
| <i>Coendou_villosus</i>            | 0 | 0 | 0 | 0 |
| <i>Coleura_afra</i>                | 0 | 0 | 0 | 0 |
| <i>Colobus_angolensis</i>          | 0 | 0 | 0 | 0 |
| <i>Colobus_guereza</i>             | 0 | 0 | 0 | 0 |
| <i>Colobus_polykomos</i>           | 0 | 0 | 0 | 0 |
| <i>Colobus_satanas</i>             | 0 | 0 | 0 | 0 |
| <i>Colobus_vellerosus</i>          | 0 | 0 | 0 | 0 |
| <i>Colomys_goslingi</i>            | 0 | 0 | 0 | 0 |
| <i>Condylura_cristata</i>          | 0 | 0 | 0 | 0 |
| <i>Conepatus_chinga</i>            | 0 | 0 | 0 | 0 |
| <i>Conepatus_leuconotus</i>        | 0 | 0 | 0 | 0 |
| <i>Conepatus_semistriatus</i>      | 0 | 0 | 0 | 0 |
| <i>Conilurus_penicillatus</i>      | 0 | 0 | 0 | 0 |
| <i>Connochaetes_gnou</i>           | 0 | 0 | 0 | 0 |
| <i>Connochaetes_taurinus</i>       | 0 | 0 | 0 | 0 |
| <i>Cormura_brevirostris</i>        | 0 | 0 | 0 | 0 |
| <i>Corynorhinus_mexicanus</i>      | 0 | 0 | 0 | 0 |
| <i>Corynorhinus_townsendii</i>     | 0 | 0 | 0 | 0 |
| <i>Craseonycteris_thonglongyai</i> | 0 | 0 | 0 | 0 |
| <i>Cratogeomys_castanops</i>       | 0 | 0 | 0 | 0 |
| <i>Cratogeomys_fumosus</i>         | 0 | 0 | 0 | 0 |
| <i>Cratogeomys_goldmani</i>        | 0 | 0 | 0 | 0 |
| <i>Cratogeomys_gymnurus</i>        | 0 | 0 | 0 | 0 |
| <i>Cratogeomys_merriami</i>        | 0 | 0 | 0 | 0 |
| <i>Cratogeomys_neglectus</i>       | 0 | 0 | 0 | 0 |
| <i>Cratogeomys_tylorhinus</i>      | 0 | 0 | 0 | 0 |
| <i>Cratogeomys_zinseri</i>         | 0 | 0 | 0 | 0 |
| <i>Cremnomys_cutchicus</i>         | 0 | 0 | 0 | 0 |
| <i>Cricetomys_emini</i>            | 0 | 0 | 0 | 0 |
| <i>Cricetomys_gambianus</i>        | 0 | 0 | 0 | 0 |
| <i>Cricetulus_barabensis</i>       | 0 | 0 | 0 | 0 |
| <i>Cricetulus_griseus</i>          | 0 | 0 | 0 | 0 |
| <i>Cricetulus_longicaudatus</i>    | 0 | 0 | 0 | 0 |
| <i>Cricetulus_migratorius</i>      | 0 | 0 | 0 | 0 |
| <i>Cricetulus_sokolovi</i>         | 0 | 0 | 0 | 0 |
| <i>Cricetus_cricetus</i>           | 0 | 0 | 0 | 0 |
| <i>Crocidura_aleksandrissi</i>     | 0 | 0 | 0 | 0 |

|                                |   |   |   |   |
|--------------------------------|---|---|---|---|
| <i>Crocidura_attenuata</i>     | 0 | 0 | 0 | 0 |
| <i>Crocidura_baileyi</i>       | 0 | 0 | 0 | 0 |
| <i>Crocidura_batakorum</i>     | 0 | 0 | 0 | 0 |
| <i>Crocidura_batesi</i>        | 0 | 0 | 0 | 0 |
| <i>Crocidura_beatus</i>        | 0 | 0 | 0 | 0 |
| <i>Crocidura_beccarii</i>      | 0 | 0 | 0 | 0 |
| <i>Crocidura_bottegi</i>       | 0 | 0 | 0 | 0 |
| <i>Crocidura_brunnea</i>       | 0 | 0 | 0 | 0 |
| <i>Crocidura_buettikoferi</i>  | 0 | 0 | 0 | 0 |
| <i>Crocidura_canariensis</i>   | 0 | 0 | 0 | 0 |
| <i>Crocidura_caspica</i>       | 0 | 0 | 0 | 0 |
| <i>Crocidura_crenata</i>       | 0 | 0 | 0 | 0 |
| <i>Crocidura_crossei</i>       | 0 | 0 | 0 | 0 |
| <i>Crocidura_cyanea</i>        | 0 | 0 | 0 | 0 |
| <i>Crocidura_denti</i>         | 0 | 0 | 0 | 0 |
| <i>Crocidura_dolichura</i>     | 0 | 0 | 0 | 0 |
| <i>Crocidura_douceti</i>       | 0 | 0 | 0 | 0 |
| <i>Crocidura_dsinezumi</i>     | 0 | 0 | 0 | 0 |
| <i>Crocidura_elongata</i>      | 0 | 0 | 0 | 0 |
| <i>Crocidura_flavescens</i>    | 0 | 0 | 0 | 0 |
| <i>Crocidura_foetida</i>       | 0 | 0 | 0 | 0 |
| <i>Crocidura_foxi</i>          | 0 | 0 | 0 | 0 |
| <i>Crocidura_fuliginosa</i>    | 0 | 0 | 0 | 0 |
| <i>Crocidura_fulvastra</i>     | 0 | 0 | 0 | 0 |
| <i>Crocidura_fuscomurina</i>   | 0 | 0 | 0 | 0 |
| <i>Crocidura_glassi</i>        | 0 | 0 | 0 | 0 |
| <i>Crocidura_goliath</i>       | 0 | 0 | 0 | 0 |
| <i>Crocidura_grandiceps</i>    | 0 | 0 | 0 | 0 |
| <i>Crocidura_grassei</i>       | 0 | 0 | 0 | 0 |
| <i>Crocidura_grayi</i>         | 0 | 0 | 0 | 0 |
| <i>Crocidura_hildegardeae</i>  | 0 | 0 | 0 | 0 |
| <i>Crocidura_hirta</i>         | 0 | 0 | 0 | 0 |
| <i>Crocidura_horsfieldii</i>   | 0 | 0 | 0 | 0 |
| <i>Crocidura_ichnusae</i>      | 0 | 0 | 0 | 0 |
| <i>Crocidura_indochinensis</i> | 0 | 0 | 0 | 0 |
| <i>Crocidura_jouvenetae</i>    | 0 | 0 | 0 | 0 |
| <i>Crocidura_lamottei</i>      | 0 | 0 | 0 | 0 |
| <i>Crocidura_lasiura</i>       | 0 | 0 | 0 | 0 |
| <i>Crocidura_lea</i>           | 0 | 0 | 0 | 0 |
| <i>Crocidura_lepidura</i>      | 0 | 0 | 0 | 0 |
| <i>Crocidura_leucodon</i>      | 0 | 0 | 0 | 0 |
| <i>Crocidura_levicula</i>      | 0 | 0 | 0 | 0 |
| <i>Crocidura_littoralis</i>    | 0 | 0 | 0 | 0 |
| <i>Crocidura_ludia</i>         | 0 | 0 | 0 | 0 |



|                                |   |   |   |   |
|--------------------------------|---|---|---|---|
| <i>Crocidura_luna</i>          | 0 | 0 | 0 | 0 |
| <i>Crocidura_lusitania</i>     | 0 | 0 | 0 | 0 |
| <i>Crocidura_macmillani</i>    | 0 | 0 | 0 | 0 |
| <i>Crocidura_malayana</i>      | 0 | 0 | 0 | 0 |
| <i>Crocidura_mariquensis</i>   | 0 | 0 | 0 | 0 |
| <i>Crocidura_maurisca</i>      | 0 | 0 | 0 | 0 |
| <i>Crocidura_maxi</i>          | 0 | 0 | 0 | 0 |
| <i>Crocidura_mindorus</i>      | 0 | 0 | 0 | 0 |
| <i>Crocidura_miya</i>          | 0 | 0 | 0 | 0 |
| <i>Crocidura_monax</i>         | 0 | 0 | 0 | 0 |
| <i>Crocidura_muricauda</i>     | 0 | 0 | 0 | 0 |
| <i>Crocidura_musseri</i>       | 0 | 0 | 0 | 0 |
| <i>Crocidura_nanilla</i>       | 0 | 0 | 0 | 0 |
| <i>Crocidura_negligens</i>     | 0 | 0 | 0 | 0 |
| <i>Crocidura_negrina</i>       | 0 | 0 | 0 | 0 |
| <i>Crocidura_nigeriae</i>      | 0 | 0 | 0 | 0 |
| <i>Crocidura_nigripes</i>      | 0 | 0 | 0 | 0 |
| <i>Crocidura_nimbae</i>        | 0 | 0 | 0 | 0 |
| <i>Crocidura_obscurior</i>     | 0 | 0 | 0 | 0 |
| <i>Crocidura_olivieri</i>      | 0 | 0 | 0 | 0 |
| <i>Crocidura_orientalis</i>    | 0 | 0 | 0 | 0 |
| <i>Crocidura_orii</i>          | 0 | 0 | 0 | 0 |
| <i>Crocidura_palawanensis</i>  | 0 | 0 | 0 | 0 |
| <i>Crocidura_panayensis</i>    | 0 | 0 | 0 | 0 |
| <i>Crocidura_paradoxura</i>    | 0 | 0 | 0 | 0 |
| <i>Crocidura_parvipes</i>      | 0 | 0 | 0 | 0 |
| <i>Crocidura_poensis</i>       | 0 | 0 | 0 | 0 |
| <i>Crocidura_rapax</i>         | 0 | 0 | 0 | 0 |
| <i>Crocidura_rhoditis</i>      | 0 | 0 | 0 | 0 |
| <i>Crocidura_roosevelti</i>    | 0 | 0 | 0 | 0 |
| <i>Crocidura_russula</i>       | 0 | 0 | 0 | 0 |
| <i>Crocidura_shantungensis</i> | 0 | 0 | 0 | 0 |
| <i>Crocidura_sibirica</i>      | 0 | 0 | 0 | 0 |
| <i>Crocidura_sicula</i>        | 0 | 0 | 0 | 0 |
| <i>Crocidura_silacea</i>       | 0 | 0 | 0 | 0 |
| <i>Crocidura_suaveolens</i>    | 0 | 0 | 0 | 0 |
| <i>Crocidura_tanakae</i>       | 0 | 0 | 0 | 0 |
| <i>Crocidura_tarfayensis</i>   | 0 | 0 | 0 | 0 |
| <i>Crocidura_thalia</i>        | 0 | 0 | 0 | 0 |
| <i>Crocidura_theresae</i>      | 0 | 0 | 0 | 0 |
| <i>Crocidura_turba</i>         | 0 | 0 | 0 | 0 |
| <i>Crocidura_viaria</i>        | 0 | 0 | 0 | 0 |
| <i>Crocidura_watasei</i>       | 0 | 0 | 0 | 0 |
| <i>Crocidura_wuchihensis</i>   | 0 | 0 | 0 | 0 |

|                                  |   |   |   |   |
|----------------------------------|---|---|---|---|
| <i>Crocidura_zarudnyi</i>        | 0 | 0 | 0 | 0 |
| <i>Crocidura_zimmermanni</i>     | 0 | 0 | 0 | 0 |
| <i>Crocuta_crocuta</i>           | 0 | 0 | 0 | 0 |
| <i>Crossarchus_alexandri</i>     | 0 | 0 | 0 | 0 |
| <i>Crossarchus_obscurus</i>      | 0 | 0 | 0 | 0 |
| <i>Crossarchus_platycephalus</i> | 0 | 0 | 0 | 0 |
| <i>Crossomys_moncktoni</i>       | 0 | 0 | 0 | 0 |
| <i>Crunomys_melanius</i>         | 0 | 0 | 0 | 0 |
| <i>Cryptomys_hottentotus</i>     | 0 | 0 | 0 | 0 |
| <i>Cryptoprocta_ferox</i>        | 0 | 0 | 0 | 0 |
| <i>Cryptotis_goldmani</i>        | 0 | 0 | 0 | 0 |
| <i>Cryptotis_gracilis</i>        | 0 | 0 | 0 | 0 |
| <i>Cryptotis_magna</i>           | 0 | 0 | 0 | 0 |
| <i>Cryptotis_mexicana</i>        | 0 | 0 | 0 | 0 |
| <i>Cryptotis_nelsoni</i>         | 0 | 0 | 0 | 0 |
| <i>Cryptotis_nigrescens</i>      | 0 | 0 | 0 | 0 |
| <i>Cryptotis_parva</i>           | 0 | 0 | 0 | 0 |
| <i>Ctenodactylus_gundi</i>       | 0 | 0 | 0 | 0 |
| <i>Ctenodactylus_vali</i>        | 0 | 0 | 0 | 0 |
| <i>Ctenomys_argentinus</i>       | 0 | 0 | 0 | 0 |
| <i>Ctenomys_australis</i>        | 0 | 0 | 0 | 0 |
| <i>Ctenomys_azarae</i>           | 0 | 0 | 0 | 0 |
| <i>Ctenomys_bergi</i>            | 0 | 0 | 0 | 0 |
| <i>Ctenomys_boliviensis</i>      | 0 | 0 | 0 | 0 |
| <i>Ctenomys_bonettoi</i>         | 0 | 0 | 0 | 0 |
| <i>Ctenomys_colburni</i>         | 0 | 0 | 0 | 0 |
| <i>Ctenomys_conoveri</i>         | 0 | 0 | 0 | 0 |
| <i>Ctenomys_coyhaiquensis</i>    | 0 | 0 | 0 | 0 |
| <i>Ctenomys_flamarioni</i>       | 0 | 0 | 0 | 0 |
| <i>Ctenomys_fodax</i>            | 0 | 0 | 0 | 0 |
| <i>Ctenomys_frater</i>           | 0 | 0 | 0 | 0 |
| <i>Ctenomys_fulvus</i>           | 0 | 0 | 0 | 0 |
| <i>Ctenomys_goodfellowi</i>      | 0 | 0 | 0 | 0 |
| <i>Ctenomys_haigi</i>            | 0 | 0 | 0 | 0 |
| <i>Ctenomys_juris</i>            | 0 | 0 | 0 | 0 |
| <i>Ctenomys_lami</i>             | 0 | 0 | 0 | 0 |
| <i>Ctenomys_latro</i>            | 0 | 0 | 0 | 0 |
| <i>Ctenomys_leucodon</i>         | 0 | 0 | 0 | 0 |
| <i>Ctenomys_lewisi</i>           | 0 | 0 | 0 | 0 |
| <i>Ctenomys_magellanicus</i>     | 0 | 0 | 0 | 0 |
| <i>Ctenomys_maulinus</i>         | 0 | 0 | 0 | 0 |
| <i>Ctenomys_mendocinus</i>       | 0 | 0 | 0 | 0 |
| <i>Ctenomys_minutus</i>          | 0 | 0 | 0 | 0 |
| <i>Ctenomys_nattereri</i>        | 0 | 0 | 0 | 0 |

|                                 |   |   |   |   |
|---------------------------------|---|---|---|---|
| <i>Ctenomys_occultus</i>        | 0 | 0 | 0 | 0 |
| <i>Ctenomys_opimus</i>          | 0 | 0 | 0 | 0 |
| <i>Ctenomys_pearsoni</i>        | 0 | 0 | 0 | 0 |
| <i>Ctenomys_perrensi</i>        | 0 | 0 | 0 | 0 |
| <i>Ctenomys_porteausi</i>       | 0 | 0 | 0 | 0 |
| <i>Ctenomys_pundti</i>          | 0 | 0 | 0 | 0 |
| <i>Ctenomys_rionegrensis</i>    | 0 | 0 | 0 | 0 |
| <i>Ctenomys_roigi</i>           | 0 | 0 | 0 | 0 |
| <i>Ctenomys_saltarius</i>       | 0 | 0 | 0 | 0 |
| <i>Ctenomys_scagliai</i>        | 0 | 0 | 0 | 0 |
| <i>Ctenomys_sericeus</i>        | 0 | 0 | 0 | 0 |
| <i>Ctenomys_sociabilis</i>      | 0 | 0 | 0 | 0 |
| <i>Ctenomys_steinbachi</i>      | 0 | 0 | 0 | 0 |
| <i>Ctenomys_talarum</i>         | 0 | 0 | 0 | 0 |
| <i>Ctenomys_torquatus</i>       | 0 | 0 | 0 | 0 |
| <i>Ctenomys_tuconax</i>         | 0 | 0 | 0 | 0 |
| <i>Ctenomys_tucumanus</i>       | 0 | 0 | 0 | 0 |
| <i>Cuniculus_paca</i>           | 0 | 0 | 0 | 0 |
| <i>Cuniculus_taczanowskii</i>   | 0 | 0 | 0 | 0 |
| <i>Cuon_alpinus</i>             | 0 | 0 | 0 | 0 |
| <i>Cyclopes_didactylus</i>      | 0 | 0 | 0 | 0 |
| <i>Cynictis_penicillata</i>     | 0 | 0 | 0 | 0 |
| <i>Cynocephalus_volans</i>      | 0 | 0 | 0 | 0 |
| <i>Cynogale_bennettii</i>       | 0 | 0 | 0 | 0 |
| <i>Cynomops_abrasus</i>         | 0 | 0 | 0 | 0 |
| <i>Cynomops_paranus</i>         | 0 | 0 | 0 | 0 |
| <i>Cynomops_planirostris</i>    | 0 | 0 | 0 | 0 |
| <i>Cynomys_gunnisoni</i>        | 0 | 0 | 0 | 0 |
| <i>Cynomys_leucurus</i>         | 0 | 0 | 0 | 0 |
| <i>Cynomys_ludovicianus</i>     | 0 | 0 | 0 | 0 |
| <i>Cynomys_mexicanus</i>        | 0 | 0 | 0 | 0 |
| <i>Cynomys_parvidens</i>        | 0 | 0 | 0 | 0 |
| <i>Cynopterus_brachyotis</i>    | 0 | 0 | 0 | 0 |
| <i>Cynopterus_horsfieldii</i>   | 0 | 0 | 0 | 0 |
| <i>Cynopterus_nusatenggara</i>  | 0 | 0 | 0 | 0 |
| <i>Cynopterus_sphinx</i>        | 0 | 0 | 0 | 0 |
| <i>Cynopterus_tithaecheilus</i> | 0 | 0 | 0 | 0 |
| <i>Cystophora_cristata</i>      | 0 | 0 | 0 | 0 |
| <i>Cyttarops_alecto</i>         | 0 | 0 | 0 | 0 |
| <i>Dacnomys_millardi</i>        | 0 | 0 | 0 | 0 |
| <i>Dactylomys_boliviensis</i>   | 0 | 0 | 0 | 0 |
| <i>Dactylomys_dactylinus</i>    | 0 | 0 | 0 | 0 |
| <i>Dactylomys_peruanus</i>      | 0 | 0 | 0 | 0 |
| <i>Dama_dama</i>                | 0 | 0 | 0 | 0 |

|                                     |   |   |   |   |
|-------------------------------------|---|---|---|---|
| <i>Dama_mesopotamica</i>            | 0 | 0 | 0 | 0 |
| <i>Damaliscus_lunatus</i>           | 0 | 0 | 0 | 0 |
| <i>Damaliscus_pygargus</i>          | 0 | 0 | 0 | 0 |
| <i>Dasymys_incomtus</i>             | 0 | 0 | 0 | 0 |
| <i>Dasymys_rufulus</i>              | 0 | 0 | 0 | 0 |
| <i>Dasyprocta_fuliginosa</i>        | 0 | 0 | 0 | 0 |
| <i>Dasyprocta_leporina</i>          | 0 | 0 | 0 | 0 |
| <i>Dasyprocta_punctata</i>          | 0 | 0 | 0 | 0 |
| <i>Dasypus_kappleri</i>             | 0 | 0 | 0 | 0 |
| <i>Dasypus_novemcinctus</i>         | 0 | 0 | 0 | 0 |
| <i>Daubentonia_madagascariensis</i> | 0 | 0 | 0 | 0 |
| <i>Delomys_collinus</i>             | 0 | 0 | 0 | 0 |
| <i>Delomys_dorsalis</i>             | 0 | 0 | 0 | 0 |
| <i>Delomys_sublineatus</i>          | 0 | 0 | 0 | 0 |
| <i>Delphinapterus_leucas</i>        | 0 | 0 | 0 | 0 |
| <i>Delphinus_capensis</i>           | 0 | 0 | 0 | 0 |
| <i>Delphinus_delphis</i>            | 0 | 0 | 0 | 0 |
| <i>Delphinus_tropicalis</i>         | 0 | 0 | 0 | 0 |
| <i>Deltamys_kempi</i>               | 0 | 0 | 0 | 0 |
| <i>Dendrogale_melanura</i>          | 0 | 0 | 0 | 0 |
| <i>Dendrogale_murina</i>            | 0 | 0 | 0 | 0 |
| <i>Dendrohyrax_arboreus</i>         | 0 | 0 | 0 | 0 |
| <i>Dendrohyrax_dorsalis</i>         | 0 | 0 | 0 | 0 |
| <i>Dendromus_mesomelas</i>          | 0 | 0 | 0 | 0 |
| <i>Dendromus_mystacalis</i>         | 0 | 0 | 0 | 0 |
| <i>Dendromus_nyikae</i>             | 0 | 0 | 0 | 0 |
| <i>Deomys_ferrugineus</i>           | 0 | 0 | 0 | 0 |
| <i>Dephomyys_defua</i>              | 0 | 0 | 0 | 0 |
| <i>Dermanura_rosenbergi</i>         | 0 | 0 | 0 | 0 |
| <i>Desmalopex_leucopterus</i>       | 0 | 0 | 0 | 0 |
| <i>Desmana_moschata</i>             | 0 | 0 | 0 | 0 |
| <i>Desmodilliscus_braueri</i>       | 0 | 0 | 0 | 0 |
| <i>Desmodillus_auricularis</i>      | 0 | 0 | 0 | 0 |
| <i>Desmodus_rotundus</i>            | 0 | 0 | 0 | 0 |
| <i>Desmomys_harringtoni</i>         | 0 | 0 | 0 | 0 |
| <i>Diaemus_youngi</i>               | 0 | 0 | 0 | 0 |
| <i>Dicerorhinus_sumatrensis</i>     | 0 | 0 | 0 | 0 |
| <i>Diceros_bicornis</i>             | 0 | 0 | 0 | 0 |
| <i>Diclidurus_albus</i>             | 0 | 0 | 0 | 0 |
| <i>Diclidurus_ingens</i>            | 0 | 0 | 0 | 0 |
| <i>Diclidurus_isabellus</i>         | 0 | 0 | 0 | 0 |
| <i>Diclidurus_scutatus</i>          | 0 | 0 | 0 | 0 |
| <i>Dicrostonyx_groenlandicus</i>    | 0 | 0 | 0 | 0 |
| <i>Dicrostonyx_hudsonius</i>        | 0 | 0 | 0 | 0 |

|                                |   |   |   |   |
|--------------------------------|---|---|---|---|
| <i>Dicrostonyx_richardsoni</i> | 0 | 0 | 0 | 0 |
| <i>Dicrostonyx_torquatus</i>   | 0 | 0 | 0 | 0 |
| <i>Dinaromys_bogdanovi</i>     | 0 | 0 | 0 | 0 |
| <i>Dinomys_branickii</i>       | 0 | 0 | 0 | 0 |
| <i>Diphylla_ecaudata</i>       | 0 | 0 | 0 | 0 |
| <i>Diplogale_hosei</i>         | 0 | 0 | 0 | 0 |
| <i>Diplomesodon_pulchellum</i> | 0 | 0 | 0 | 0 |
| <i>Diplothrix_legata</i>       | 0 | 0 | 0 | 0 |
| <i>Dipodillus_campestris</i>   | 0 | 0 | 0 | 0 |
| <i>Dipodillus_dasyurus</i>     | 0 | 0 | 0 | 0 |
| <i>Dipodillus_simoni</i>       | 0 | 0 | 0 | 0 |
| <i>Dipodomys_agilis</i>        | 0 | 0 | 0 | 0 |
| <i>Dipodomys_californicus</i>  | 0 | 0 | 0 | 0 |
| <i>Dipodomys_compactus</i>     | 0 | 0 | 0 | 0 |
| <i>Dipodomys_deserti</i>       | 0 | 0 | 0 | 0 |
| <i>Dipodomys_elator</i>        | 0 | 0 | 0 | 0 |
| <i>Dipodomys_gravipes</i>      | 0 | 0 | 0 | 0 |
| <i>Dipodomys_heermanni</i>     | 0 | 0 | 0 | 0 |
| <i>Dipodomys_ingens</i>        | 0 | 0 | 0 | 0 |
| <i>Dipodomys_merriami</i>      | 0 | 0 | 0 | 0 |
| <i>Dipodomys_microps</i>       | 0 | 0 | 0 | 0 |
| <i>Dipodomys_nelsoni</i>       | 0 | 0 | 0 | 0 |
| <i>Dipodomys_nitratoides</i>   | 0 | 0 | 0 | 0 |
| <i>Dipodomys_ordii</i>         | 0 | 0 | 0 | 0 |
| <i>Dipodomys_panamintinus</i>  | 0 | 0 | 0 | 0 |
| <i>Dipodomys_phillipsii</i>    | 0 | 0 | 0 | 0 |
| <i>Dipodomys_simulans</i>      | 0 | 0 | 0 | 0 |
| <i>Dipodomys_spectabilis</i>   | 0 | 0 | 0 | 0 |
| <i>Dipodomys_stephensi</i>     | 0 | 0 | 0 | 0 |
| <i>Dipodomys_venustus</i>      | 0 | 0 | 0 | 0 |
| <i>Dipus_sagitta</i>           | 0 | 0 | 0 | 0 |
| <i>Dobsonia_inermis</i>        | 0 | 0 | 0 | 0 |
| <i>Dobsonia_magna</i>          | 0 | 0 | 0 | 0 |
| <i>Dobsonia_minor</i>          | 0 | 0 | 0 | 0 |
| <i>Dobsonia_moluccensis</i>    | 0 | 0 | 0 | 0 |
| <i>Dobsonia_pannietensis</i>   | 0 | 0 | 0 | 0 |
| <i>Dobsonia_praedatrix</i>     | 0 | 0 | 0 | 0 |
| <i>Dobsonia_viridis</i>        | 0 | 0 | 0 | 0 |
| <i>Dolichotis_patagonum</i>    | 0 | 0 | 0 | 0 |
| <i>Dolichotis_salinicola</i>   | 0 | 0 | 0 | 0 |
| <i>Dorcatragus_megalotis</i>   | 0 | 0 | 0 | 0 |
| <i>Dremomys_gularis</i>        | 0 | 0 | 0 | 0 |
| <i>Dremomys_lokriah</i>        | 0 | 0 | 0 | 0 |
| <i>Dremomys_pernyi</i>         | 0 | 0 | 0 | 0 |

|                                    |   |   |   |   |
|------------------------------------|---|---|---|---|
| <i>Dremomys_pyrrhomerus</i>        | 0 | 0 | 0 | 0 |
| <i>Dremomys_rufigenis</i>          | 0 | 0 | 0 | 0 |
| <i>Drymoreomys_albimaculatus</i>   | 0 | 0 | 0 | 0 |
| <i>Dryomys_laniger</i>             | 0 | 0 | 0 | 0 |
| <i>Dryomys_nitedula</i>            | 0 | 0 | 0 | 0 |
| <i>Dugong_dugon</i>                | 0 | 0 | 0 | 0 |
| <i>Dusicyon_australis</i>          | 0 | 0 | 0 | 0 |
| <i>Dyacopecterus_spadiceus</i>     | 0 | 0 | 0 | 0 |
| <i>Dymecodon_pilirostris</i>       | 0 | 0 | 0 | 0 |
| <i>Echimys_chrysurus</i>           | 0 | 0 | 0 | 0 |
| <i>Echimys_semivillosus</i>        | 0 | 0 | 0 | 0 |
| <i>Echinops_telfairi</i>           | 0 | 0 | 0 | 0 |
| <i>Echinosorex_gymnura</i>         | 0 | 0 | 0 | 0 |
| <i>Ectophylla_alba</i>             | 0 | 0 | 0 | 0 |
| <i>Eidolon_helvum</i>              | 0 | 0 | 0 | 0 |
| <i>Eira_barbara</i>                | 0 | 0 | 0 | 0 |
| <i>Elaphodus_cephalophus</i>       | 0 | 0 | 0 | 0 |
| <i>Elaphurus_davidianus</i>        | 0 | 0 | 0 | 0 |
| <i>Elephantulus_brachyrhynchus</i> | 0 | 0 | 0 | 0 |
| <i>Elephantulus_edwardii</i>       | 0 | 0 | 0 | 0 |
| <i>Elephantulus_fuscipes</i>       | 0 | 0 | 0 | 0 |
| <i>Elephantulus_fuscus</i>         | 0 | 0 | 0 | 0 |
| <i>Elephantulus_intufi</i>         | 0 | 0 | 0 | 0 |
| <i>Elephantulus_myurus</i>         | 0 | 0 | 0 | 0 |
| <i>Elephantulus_revoili</i>        | 0 | 0 | 0 | 0 |
| <i>Elephantulus_rozeti</i>         | 0 | 0 | 0 | 0 |
| <i>Elephantulus_rufescens</i>      | 0 | 0 | 0 | 0 |
| <i>Elephantulus_rupestris</i>      | 0 | 0 | 0 | 0 |
| <i>Elephantulus_sp._HS451</i>      | 0 | 0 | 0 | 0 |
| <i>Elephas_maximus</i>             | 0 | 0 | 0 | 0 |
| <i>Eligmodontia_moreni</i>         | 0 | 0 | 0 | 0 |
| <i>Eligmodontia_morgani</i>        | 0 | 0 | 0 | 0 |
| <i>Eligmodontia_puerulus</i>       | 0 | 0 | 0 | 0 |
| <i>Eligmodontia_typus</i>          | 0 | 0 | 0 | 0 |
| <i>Eliomys_melanurus</i>           | 0 | 0 | 0 | 0 |
| <i>Eliomys_quercinus</i>           | 0 | 0 | 0 | 0 |
| <i>Eliurus_majori</i>              | 0 | 0 | 0 | 0 |
| <i>Eliurus_minor</i>               | 0 | 0 | 0 | 0 |
| <i>Eliurus_myoxinus</i>            | 0 | 0 | 0 | 0 |
| <i>Eliurus_tanala</i>              | 0 | 0 | 0 | 0 |
| <i>Eliurus_webbi</i>               | 0 | 0 | 0 | 0 |
| <i>Ellobius_fuscocapillus</i>      | 0 | 0 | 0 | 0 |
| <i>Ellobius_lutescens</i>          | 0 | 0 | 0 | 0 |
| <i>Ellobius_talpinus</i>           | 0 | 0 | 0 | 0 |

|                                |   |   |   |   |
|--------------------------------|---|---|---|---|
| <i>Ellobius_tancrei</i>        | 0 | 0 | 0 | 0 |
| <i>Emballonura_alecto</i>      | 0 | 0 | 0 | 0 |
| <i>Emballonura_atrata</i>      | 0 | 0 | 0 | 0 |
| <i>Emballonura_beccarii</i>    | 0 | 0 | 0 | 0 |
| <i>Emballonura_dianae</i>      | 0 | 0 | 0 | 0 |
| <i>Emballonura_monticola</i>   | 0 | 0 | 0 | 0 |
| <i>Emballonura_raffrayana</i>  | 0 | 0 | 0 | 0 |
| <i>Emballonura_semicaudata</i> | 0 | 0 | 0 | 0 |
| <i>Emballonura_tiavato</i>     | 0 | 0 | 0 | 0 |
| <i>Enhydra_lutris</i>          | 0 | 0 | 0 | 0 |
| <i>Eoglaucomys_fimbriatus</i>  | 0 | 0 | 0 | 0 |
| <i>Eolagurus_luteus</i>        | 0 | 0 | 0 | 0 |
| <i>Eonycteris_major</i>        | 0 | 0 | 0 | 0 |
| <i>Eonycteris_robusta</i>      | 0 | 0 | 0 | 0 |
| <i>Eonycteris_spelaea</i>      | 0 | 0 | 0 | 0 |
| <i>Eospalax_fontanierii</i>    | 0 | 0 | 0 | 0 |
| <i>Eospalax_rothschildi</i>    | 0 | 0 | 0 | 0 |
| <i>Eospalax_smithii</i>        | 0 | 0 | 0 | 0 |
| <i>Eothenomys_cachinus</i>     | 0 | 0 | 0 | 0 |
| <i>Eothenomys_chinensis</i>    | 0 | 0 | 0 | 0 |
| <i>Eothenomys_custos</i>       | 0 | 0 | 0 | 0 |
| <i>Eothenomys_eleusis</i>      | 0 | 0 | 0 | 0 |
| <i>Eothenomys_melanogaster</i> | 0 | 0 | 0 | 0 |
| <i>Eothenomys_miletus</i>      | 0 | 0 | 0 | 0 |
| <i>Eothenomys_olitor</i>       | 0 | 0 | 0 | 0 |
| <i>Eothenomys_proditor</i>     | 0 | 0 | 0 | 0 |
| <i>Eothenomys_smithii</i>      | 0 | 0 | 0 | 0 |
| <i>Eozapus_setchuanus</i>      | 0 | 0 | 0 | 0 |
| <i>Episoriculus_caudatus</i>   | 0 | 0 | 0 | 0 |
| <i>Episoriculus_fumidus</i>    | 0 | 0 | 0 | 0 |
| <i>Episoriculus_leucops</i>    | 0 | 0 | 0 | 0 |
| <i>Episoriculus_macrurus</i>   | 0 | 0 | 0 | 0 |
| <i>Epixerus_wilsoni</i>        | 0 | 0 | 0 | 0 |
| <i>Epomophorus_crypturus</i>   | 0 | 0 | 0 | 0 |
| <i>Epomophorus_gambianus</i>   | 0 | 0 | 0 | 0 |
| <i>Epomophorus_minor</i>       | 0 | 0 | 0 | 0 |
| <i>Epomophorus_wahlbergi</i>   | 0 | 0 | 0 | 0 |
| <i>Epomops_franqueti</i>       | 0 | 0 | 0 | 0 |
| <i>Eptesicus_bottae</i>        | 0 | 0 | 0 | 0 |
| <i>Eptesicus_brasiliensis</i>  | 0 | 0 | 0 | 0 |
| <i>Eptesicus_chiriquinus</i>   | 0 | 0 | 0 | 0 |
| <i>Eptesicus_diminutus</i>     | 0 | 0 | 0 | 0 |
| <i>Eptesicus_dimissus</i>      | 0 | 0 | 0 | 0 |
| <i>Eptesicus_furinalis</i>     | 0 | 0 | 0 | 0 |

|                                 |   |   |   |   |
|---------------------------------|---|---|---|---|
| <i>Eptesicus_fuscus</i>         | 0 | 0 | 0 | 0 |
| <i>Eptesicus_gobiensis</i>      | 0 | 0 | 0 | 0 |
| <i>Eptesicus_hottentotus</i>    | 0 | 0 | 0 | 0 |
| <i>Eptesicus_nasutus</i>        | 0 | 0 | 0 | 0 |
| <i>Eptesicus_nilssoni</i>       | 0 | 0 | 0 | 0 |
| <i>Eptesicus_regulus</i>        | 0 | 0 | 0 | 0 |
| <i>Eptesicus_serotinus</i>      | 0 | 0 | 0 | 0 |
| <i>Eptesicus_vulturinus</i>     | 0 | 0 | 0 | 0 |
| <i>Equus_asinus</i>             | 0 | 0 | 0 | 0 |
| <i>Equus_burchellii</i>         | 0 | 0 | 0 | 0 |
| <i>Equus_caballus</i>           | 0 | 0 | 0 | 0 |
| <i>Equus_grevyi</i>             | 0 | 0 | 0 | 0 |
| <i>Equus_hemionus</i>           | 0 | 0 | 0 | 0 |
| <i>Equus_kiang</i>              | 0 | 0 | 0 | 0 |
| <i>Equus_sp._KU62158</i>        | 0 | 0 | 0 | 0 |
| <i>Equus_zebra</i>              | 0 | 0 | 0 | 0 |
| <i>Eremitalpa_granti</i>        | 0 | 0 | 0 | 0 |
| <i>Eremodipus_lichtensteini</i> | 0 | 0 | 0 | 0 |
| <i>Eremoryzomys_polius</i>      | 0 | 0 | 0 | 0 |
| <i>Erethizon_dorsatum</i>       | 0 | 0 | 0 | 0 |
| <i>Erignathus_barbatus</i>      | 0 | 0 | 0 | 0 |
| <i>Erinaceus_amurensis</i>      | 0 | 0 | 0 | 0 |
| <i>Erinaceus_concolor</i>       | 0 | 0 | 0 | 0 |
| <i>Erinaceus_europaeus</i>      | 0 | 0 | 0 | 0 |
| <i>Erinaceus_roumanicus</i>     | 0 | 0 | 0 | 0 |
| <i>Erophylla_bombifrons</i>     | 0 | 0 | 0 | 0 |
| <i>Erophylla_sezekorni</i>      | 0 | 0 | 0 | 0 |
| <i>Erythrocebus_patas</i>       | 0 | 0 | 0 | 0 |
| <i>Eschrichtius_robustus</i>    | 0 | 0 | 0 | 0 |
| <i>Eubalaena_australis</i>      | 0 | 0 | 0 | 0 |
| <i>Eubalaena_glacialis</i>      | 0 | 0 | 0 | 0 |
| <i>Eubalaena_japonica</i>       | 0 | 0 | 0 | 0 |
| <i>Euchoreutes_naso</i>         | 0 | 0 | 0 | 0 |
| <i>Euderma_maculatum</i>        | 0 | 0 | 0 | 0 |
| <i>Eudiscopus_denticulus</i>    | 0 | 0 | 0 | 0 |
| <i>Eudorcas_rufifrons</i>       | 0 | 0 | 0 | 0 |
| <i>Eudorcas_thomsonii</i>       | 0 | 0 | 0 | 0 |
| <i>Eulemur_albifrons</i>        | 0 | 0 | 0 | 0 |
| <i>Eulemur_cinereiceps</i>      | 0 | 0 | 0 | 0 |
| <i>Eulemur_coronatus</i>        | 0 | 0 | 0 | 0 |
| <i>Eulemur_fulvus</i>           | 0 | 0 | 0 | 0 |
| <i>Eulemur_macaco</i>           | 0 | 0 | 0 | 0 |
| <i>Eulemur_mongoz</i>           | 0 | 0 | 0 | 0 |
| <i>Eulemur_rubriventer</i>      | 0 | 0 | 0 | 0 |



|                                 |   |   |   |   |
|---------------------------------|---|---|---|---|
| <i>Eulemur_rufus</i>            | 0 | 0 | 0 | 0 |
| <i>Eumetopias_jubatus</i>       | 0 | 0 | 0 | 0 |
| <i>Eumops_auripendulus</i>      | 0 | 0 | 0 | 0 |
| <i>Eumops_hansae</i>            | 0 | 0 | 0 | 0 |
| <i>Eumops_maurus</i>            | 0 | 0 | 0 | 0 |
| <i>Eumops_underwoodi</i>        | 0 | 0 | 0 | 0 |
| <i>Euneomys_chinchilloides</i>  | 0 | 0 | 0 | 0 |
| <i>Euneomys_mordax</i>          | 0 | 0 | 0 | 0 |
| <i>Euoticus_elegantulus</i>     | 0 | 0 | 0 | 0 |
| <i>Eupetaurus_cinereus</i>      | 0 | 0 | 0 | 0 |
| <i>Euphractus_sexcinctus</i>    | 0 | 0 | 0 | 0 |
| <i>Eupleres_goudotii</i>        | 0 | 0 | 0 | 0 |
| <i>Euroscaptor_longirostris</i> | 0 | 0 | 0 | 0 |
| <i>Euroscaptor_micrura</i>      | 0 | 0 | 0 | 0 |
| <i>Euroscaptor_mizura</i>       | 0 | 0 | 0 | 0 |
| <i>Euryoryzomys_lamia</i>       | 0 | 0 | 0 | 0 |
| <i>Euryoryzomys_macconnelli</i> | 0 | 0 | 0 | 0 |
| <i>Euryoryzomys_nitidus</i>     | 0 | 0 | 0 | 0 |
| <i>Euryoryzomys_russatus</i>    | 0 | 0 | 0 | 0 |
| <i>Euryzygomatomys_spinosus</i> | 0 | 0 | 0 | 0 |
| <i>Exilisciurus_concinnus</i>   | 0 | 0 | 0 | 0 |
| <i>Exilisciurus_exilis</i>      | 0 | 0 | 0 | 0 |
| <i>Felis_catus</i>              | 0 | 0 | 0 | 0 |
| <i>Felis_chaus</i>              | 0 | 0 | 0 | 0 |
| <i>Felis_margarita</i>          | 0 | 0 | 0 | 0 |
| <i>Felis_nigripes</i>           | 0 | 0 | 0 | 0 |
| <i>Felis_silvestris</i>         | 0 | 0 | 0 | 0 |
| <i>Feresa_attenuata</i>         | 0 | 0 | 0 | 0 |
| <i>Fossa_fossana</i>            | 0 | 0 | 0 | 0 |
| <i>Fukomys_amatus</i>           | 0 | 0 | 0 | 0 |
| <i>Fukomys_anselli</i>          | 0 | 0 | 0 | 0 |
| <i>Fukomys_bocagei</i>          | 0 | 0 | 0 | 0 |
| <i>Fukomys_damarensis</i>       | 0 | 0 | 0 | 0 |
| <i>Fukomys_darlingi</i>         | 0 | 0 | 0 | 0 |
| <i>Fukomys_foxi</i>             | 0 | 0 | 0 | 0 |
| <i>Fukomys_mechowii</i>         | 0 | 0 | 0 | 0 |
| <i>Fukomys_ochraceocinereus</i> | 0 | 0 | 0 | 0 |
| <i>Fukomys_sp._CGF-2010a</i>    | 0 | 0 | 0 | 0 |
| <i>Fukomys_sp._PAVD-2007</i>    | 0 | 0 | 0 | 0 |
| <i>Fukomys_whytei</i>           | 0 | 0 | 0 | 0 |
| <i>Funambulus_layardi</i>       | 0 | 0 | 0 | 0 |
| <i>Funambulus_palmarum</i>      | 0 | 0 | 0 | 0 |
| <i>Funambulus_pennantii</i>     | 0 | 0 | 0 | 0 |
| <i>Funambulus_sublineatus</i>   | 0 | 0 | 0 | 0 |

|                                |   |   |   |   |
|--------------------------------|---|---|---|---|
| <i>Funisciurus_carruthersi</i> | 0 | 0 | 0 | 0 |
| <i>Funisciurus_pyrropus</i>    | 0 | 0 | 0 | 0 |
| <i>Furipterus_horrens</i>      | 0 | 0 | 0 | 0 |
| <i>Galago_alleni</i>           | 0 | 0 | 0 | 0 |
| <i>Galago_gabonensis</i>       | 0 | 0 | 0 | 0 |
| <i>Galago_gallarum</i>         | 0 | 0 | 0 | 0 |
| <i>Galago_granti</i>           | 0 | 0 | 0 | 0 |
| <i>Galago_matschiei</i>        | 0 | 0 | 0 | 0 |
| <i>Galago_moholi</i>           | 0 | 0 | 0 | 0 |
| <i>Galago_senegalensis</i>     | 0 | 0 | 0 | 0 |
| <i>Galago_thomasi</i>          | 0 | 0 | 0 | 0 |
| <i>Galagoides_demidoff</i>     | 0 | 0 | 0 | 0 |
| <i>Galagoides_zanzibaricus</i> | 0 | 0 | 0 | 0 |
| <i>Galea_musteloides</i>       | 0 | 0 | 0 | 0 |
| <i>Galea_spixii</i>            | 0 | 0 | 0 | 0 |
| <i>Galemys_pyrenaicus</i>      | 0 | 0 | 0 | 0 |
| <i>Galeopterus_variegatus</i>  | 0 | 0 | 0 | 0 |
| <i>Galerella_nigrata</i>       | 0 | 0 | 0 | 0 |
| <i>Galerella_pulverulenta</i>  | 0 | 0 | 0 | 0 |
| <i>Galerella_sanguinea</i>     | 0 | 0 | 0 | 0 |
| <i>Galictis_cuja</i>           | 0 | 0 | 0 | 0 |
| <i>Galictis_vittata</i>        | 0 | 0 | 0 | 0 |
| <i>Galidia_elegans</i>         | 0 | 0 | 0 | 0 |
| <i>Galidictis_fasciata</i>     | 0 | 0 | 0 | 0 |
| <i>Gazella_bennettii</i>       | 0 | 0 | 0 | 0 |
| <i>Gazella_cuvieri</i>         | 0 | 0 | 0 | 0 |
| <i>Gazella_dorcas</i>          | 0 | 0 | 0 | 0 |
| <i>Gazella_erlangeri</i>       | 0 | 0 | 0 | 0 |
| <i>Gazella_gazella</i>         | 0 | 0 | 0 | 0 |
| <i>Gazella_leptoceros</i>      | 0 | 0 | 0 | 0 |
| <i>Gazella_saudiya</i>         | 0 | 0 | 0 | 0 |
| <i>Gazella_spekei</i>          | 0 | 0 | 0 | 0 |
| <i>Gazella_subgutturosa</i>    | 0 | 0 | 0 | 0 |
| <i>Genetta_angolensis</i>      | 0 | 0 | 0 | 0 |
| <i>Genetta_bourloni</i>        | 0 | 0 | 0 | 0 |
| <i>Genetta_cristata</i>        | 0 | 0 | 0 | 0 |
| <i>Genetta_felina</i>          | 0 | 0 | 0 | 0 |
| <i>Genetta_genetta</i>         | 0 | 0 | 0 | 0 |
| <i>Genetta_johnstoni</i>       | 0 | 0 | 0 | 0 |
| <i>Genetta_maculata</i>        | 0 | 0 | 0 | 0 |
| <i>Genetta_pardina</i>         | 0 | 0 | 0 | 0 |
| <i>Genetta_poensis</i>         | 0 | 0 | 0 | 0 |
| <i>Genetta_servalina</i>       | 0 | 0 | 0 | 0 |
| <i>Genetta_sp._schoutedeni</i> | 0 | 0 | 0 | 0 |

|                                 |   |   |   |   |
|---------------------------------|---|---|---|---|
| <i>Genetta_thierryi</i>         | 0 | 0 | 0 | 0 |
| <i>Genetta_tigrina</i>          | 0 | 0 | 0 | 0 |
| <i>Genetta_victoriae</i>        | 0 | 0 | 0 | 0 |
| <i>Geogale_aurita</i>           | 0 | 0 | 0 | 0 |
| <i>Geomys_arenarius</i>         | 0 | 0 | 0 | 0 |
| <i>Geomys_attwateri</i>         | 0 | 0 | 0 | 0 |
| <i>Geomys_breviceps</i>         | 0 | 0 | 0 | 0 |
| <i>Geomys_bursarius</i>         | 0 | 0 | 0 | 0 |
| <i>Geomys_knoxjonesi</i>        | 0 | 0 | 0 | 0 |
| <i>Geomys_personatus</i>        | 0 | 0 | 0 | 0 |
| <i>Geomys_pinetis</i>           | 0 | 0 | 0 | 0 |
| <i>Geomys_texensis</i>          | 0 | 0 | 0 | 0 |
| <i>Geomys_tropicalis</i>        | 0 | 0 | 0 | 0 |
| <i>Georychus_capensis</i>       | 0 | 0 | 0 | 0 |
| <i>Geoxus_valdivianus</i>       | 0 | 0 | 0 | 0 |
| <i>Gerbilliscus_afra</i>        | 0 | 0 | 0 | 0 |
| <i>Gerbilliscus_brantsii</i>    | 0 | 0 | 0 | 0 |
| <i>Gerbilliscus_guineae</i>     | 0 | 0 | 0 | 0 |
| <i>Gerbilliscus_kempi</i>       | 0 | 0 | 0 | 0 |
| <i>Gerbilliscus_leucogaster</i> | 0 | 0 | 0 | 0 |
| <i>Gerbilliscus_nigricaudus</i> | 0 | 0 | 0 | 0 |
| <i>Gerbilliscus_robustus</i>    | 0 | 0 | 0 | 0 |
| <i>Gerbilliscus_validus</i>     | 0 | 0 | 0 | 0 |
| <i>Gerbilliscus_vicinus</i>     | 0 | 0 | 0 | 0 |
| <i>Gerbillurus_paeba</i>        | 0 | 0 | 0 | 0 |
| <i>Gerbillurus_setzeri</i>      | 0 | 0 | 0 | 0 |
| <i>Gerbillurus_tytonis</i>      | 0 | 0 | 0 | 0 |
| <i>Gerbillus_gerbillus</i>      | 0 | 0 | 0 | 0 |
| <i>Gerbillus_henleyi</i>        | 0 | 0 | 0 | 0 |
| <i>Gerbillus_hesperinus</i>     | 0 | 0 | 0 | 0 |
| <i>Gerbillus_hoogstrali</i>     | 0 | 0 | 0 | 0 |
| <i>Gerbillus_latastei</i>       | 0 | 0 | 0 | 0 |
| <i>Gerbillus_nanus</i>          | 0 | 0 | 0 | 0 |
| <i>Gerbillus_nigeriae</i>       | 0 | 0 | 0 | 0 |
| <i>Gerbillus_occidius</i>       | 0 | 0 | 0 | 0 |
| <i>Gerbillus_perpallidus</i>    | 0 | 0 | 0 | 0 |
| <i>Gerbillus_pyramidum</i>      | 0 | 0 | 0 | 0 |
| <i>Gerbillus_sp._LG-2011</i>    | 0 | 0 | 0 | 0 |
| <i>Gerbillus_tarabuli</i>       | 0 | 0 | 0 | 0 |
| <i>Giraffa_camelopardalis</i>   | 0 | 0 | 0 | 0 |
| <i>Glaucomys_sabrinus</i>       | 0 | 0 | 0 | 0 |
| <i>Glaucomys_volans</i>         | 0 | 0 | 0 | 0 |
| <i>Glauconycteris_argentata</i> | 0 | 0 | 0 | 0 |
| <i>Glauconycteris_egeria</i>    | 0 | 0 | 0 | 0 |

|                                   |   |   |   |   |
|-----------------------------------|---|---|---|---|
| <i>Glauconycteris_variegata</i>   | 0 | 0 | 0 | 0 |
| <i>Glirulus_japonicus</i>         | 0 | 0 | 0 | 0 |
| <i>Glis_glis</i>                  | 0 | 0 | 0 | 0 |
| <i>Glischropus_tylopus</i>        | 0 | 0 | 0 | 0 |
| <i>Globicephala_macrorhynchus</i> | 0 | 0 | 0 | 0 |
| <i>Globicephala_melas</i>         | 0 | 0 | 0 | 0 |
| <i>Glossophaga_commissarisi</i>   | 0 | 0 | 0 | 0 |
| <i>Glossophaga_leachii</i>        | 0 | 0 | 0 | 0 |
| <i>Glossophaga_longirostris</i>   | 0 | 0 | 0 | 0 |
| <i>Glossophaga_morenoi</i>        | 0 | 0 | 0 | 0 |
| <i>Glossophaga_soricina</i>       | 0 | 0 | 0 | 0 |
| <i>Glyphonycteris_daviesi</i>     | 0 | 0 | 0 | 0 |
| <i>Glyphonycteris_sylvestris</i>  | 0 | 0 | 0 | 0 |
| <i>Glyphotes_simus</i>            | 0 | 0 | 0 | 0 |
| <i>Golunda_elliotti</i>           | 0 | 0 | 0 | 0 |
| <i>Gorilla_beringei</i>           | 0 | 0 | 0 | 0 |
| <i>Gorilla_gorilla</i>            | 0 | 0 | 0 | 0 |
| <i>Grammomys_cometes</i>          | 0 | 0 | 0 | 0 |
| <i>Grammomys_dolichurus</i>       | 0 | 0 | 0 | 0 |
| <i>Grammomys_ibeaus</i>           | 0 | 0 | 0 | 0 |
| <i>Grammomys_macmillani</i>       | 0 | 0 | 0 | 0 |
| <i>Grampus_griseus</i>            | 0 | 0 | 0 | 0 |
| <i>Graomys_centralis</i>          | 0 | 0 | 0 | 0 |
| <i>Graomys_domorum</i>            | 0 | 0 | 0 | 0 |
| <i>Graomys_griseoflavus</i>       | 0 | 0 | 0 | 0 |
| <i>Graphiurus_lorraineus</i>      | 0 | 0 | 0 | 0 |
| <i>Graphiurus_microtis</i>        | 0 | 0 | 0 | 0 |
| <i>Graphiurus_murinus</i>         | 0 | 0 | 0 | 0 |
| <i>Graphiurus_ocularis</i>        | 0 | 0 | 0 | 0 |
| <i>Graphiurus_platyops</i>        | 0 | 0 | 0 | 0 |
| <i>Gulo_gulo</i>                  | 0 | 0 | 0 | 0 |
| <i>Gymnuromys_roberti</i>         | 0 | 0 | 0 | 0 |
| <i>Habromys_chinanteco</i>        | 0 | 0 | 0 | 0 |
| <i>Habromys_ixtlani</i>           | 0 | 0 | 0 | 0 |
| <i>Habromys_lepturus</i>          | 0 | 0 | 0 | 0 |
| <i>Habromys_lophurus</i>          | 0 | 0 | 0 | 0 |
| <i>Habromys_simulatus</i>         | 0 | 0 | 0 | 0 |
| <i>Halichoerus_grypus</i>         | 0 | 0 | 0 | 0 |
| <i>Handleyomys_alfaroi</i>        | 0 | 0 | 0 | 0 |
| <i>Handleyomys_intectus</i>       | 0 | 0 | 0 | 0 |
| <i>Handleyomys_rostratus</i>      | 0 | 0 | 0 | 0 |
| <i>Handleyomys_saturation</i>     | 0 | 0 | 0 | 0 |
| <i>Hapalemur_aureus</i>           | 0 | 0 | 0 | 0 |
| <i>Hapalemur_griseus</i>          | 0 | 0 | 0 | 0 |

|                                      |   |   |   |   |
|--------------------------------------|---|---|---|---|
| <i>Hapalemur occidentalis</i>        | 0 | 0 | 0 | 0 |
| <i>Haplonycteris fischeri</i>        | 0 | 0 | 0 | 0 |
| <i>Harpiocephalus harpia</i>         | 0 | 0 | 0 | 0 |
| <i>Harpiocephalus mordax</i>         | 0 | 0 | 0 | 0 |
| <i>Harpyionycteris celebensis</i>    | 0 | 0 | 0 | 0 |
| <i>Harpyionycteris whiteheadi</i>    | 0 | 0 | 0 | 0 |
| <i>Heimyscus fumosus</i>             | 0 | 0 | 0 | 0 |
| <i>Helarctos malayanus</i>           | 0 | 0 | 0 | 0 |
| <i>Heliophobius argenteocinereus</i> | 0 | 0 | 0 | 0 |
| <i>Heliosciurus rufobrachium</i>     | 0 | 0 | 0 | 0 |
| <i>Heliosciurus ruwenzorii</i>       | 0 | 0 | 0 | 0 |
| <i>Heliosciurus undulatus</i>        | 0 | 0 | 0 | 0 |
| <i>Helogale hirtula</i>              | 0 | 0 | 0 | 0 |
| <i>Helogale parvula</i>              | 0 | 0 | 0 | 0 |
| <i>Hemicentetes semispinosus</i>     | 0 | 0 | 0 | 0 |
| <i>Hemiechinus auritus</i>           | 0 | 0 | 0 | 0 |
| <i>Hemigalus derbyanus</i>           | 0 | 0 | 0 | 0 |
| <i>Hemitragus hylocrius</i>          | 0 | 0 | 0 | 0 |
| <i>Hemitragus jayakari</i>           | 0 | 0 | 0 | 0 |
| <i>Hemitragus jemlahicus</i>         | 0 | 0 | 0 | 0 |
| <i>Herpailurus yagouaroundi</i>      | 0 | 0 | 0 | 0 |
| <i>Herpestes auropunctatus</i>       | 0 | 0 | 0 | 0 |
| <i>Herpestes brachyurus</i>          | 0 | 0 | 0 | 0 |
| <i>Herpestes edwardsii</i>           | 0 | 0 | 0 | 0 |
| <i>Herpestes fuscus</i>              | 0 | 0 | 0 | 0 |
| <i>Herpestes ichneumon</i>           | 0 | 0 | 0 | 0 |
| <i>Herpestes javanicus</i>           | 0 | 0 | 0 | 0 |
| <i>Herpestes naso</i>                | 0 | 0 | 0 | 0 |
| <i>Herpestes smithii</i>             | 0 | 0 | 0 | 0 |
| <i>Herpestes urva</i>                | 0 | 0 | 0 | 0 |
| <i>Herpestes vitticollis</i>         | 0 | 0 | 0 | 0 |
| <i>Hesperoptenus blanfordi</i>       | 0 | 0 | 0 | 0 |
| <i>Hesperoptenus tickelli</i>        | 0 | 0 | 0 | 0 |
| <i>Hesperoptenus tomesi</i>          | 0 | 0 | 0 | 0 |
| <i>Heterocephalus glaber</i>         | 0 | 0 | 0 | 0 |
| <i>Heterohyrax brucei</i>            | 0 | 0 | 0 | 0 |
| <i>Heteromys anomalus</i>            | 0 | 0 | 0 | 0 |
| <i>Heteromys australis</i>           | 0 | 0 | 0 | 0 |
| <i>Heteromys desmarestianus</i>      | 0 | 0 | 0 | 0 |
| <i>Heteromys gaumeri</i>             | 0 | 0 | 0 | 0 |
| <i>Heteromys nelsoni</i>             | 0 | 0 | 0 | 0 |
| <i>Heteromys oresterus</i>           | 0 | 0 | 0 | 0 |
| <i>Hexaprotodon liberiensis</i>      | 0 | 0 | 0 | 0 |
| <i>Hippidion saldiasi</i>            | 0 | 0 | 0 | 0 |

|                                 |   |   |   |   |
|---------------------------------|---|---|---|---|
| <i>Hippocamelus_antisensis</i>  | 0 | 0 | 0 | 0 |
| <i>Hippocamelus_bisulcus</i>    | 0 | 0 | 0 | 0 |
| <i>Hippopotamus_amphibius</i>   | 0 | 0 | 0 | 0 |
| <i>Hipposideros_abae</i>        | 0 | 0 | 0 | 0 |
| <i>Hipposideros_armiger</i>     | 0 | 0 | 0 | 0 |
| <i>Hipposideros_ater</i>        | 0 | 0 | 0 | 0 |
| <i>Hipposideros_beatus</i>      | 0 | 0 | 0 | 0 |
| <i>Hipposideros_bicolor</i>     | 0 | 0 | 0 | 0 |
| <i>Hipposideros_caffer</i>      | 0 | 0 | 0 | 0 |
| <i>Hipposideros_calcaratus</i>  | 0 | 0 | 0 | 0 |
| <i>Hipposideros_cervinus</i>    | 0 | 0 | 0 | 0 |
| <i>Hipposideros_cineraceus</i>  | 0 | 0 | 0 | 0 |
| <i>Hipposideros_commersoni</i>  | 0 | 0 | 0 | 0 |
| <i>Hipposideros_coxi</i>        | 0 | 0 | 0 | 0 |
| <i>Hipposideros_cyclops</i>     | 0 | 0 | 0 | 0 |
| <i>Hipposideros_diadema</i>     | 0 | 0 | 0 | 0 |
| <i>Hipposideros_dinops</i>      | 0 | 0 | 0 | 0 |
| <i>Hipposideros_doriae</i>      | 0 | 0 | 0 | 0 |
| <i>Hipposideros_dyacorum</i>    | 0 | 0 | 0 | 0 |
| <i>Hipposideros_fuliginosus</i> | 0 | 0 | 0 | 0 |
| <i>Hipposideros_fulvus</i>      | 0 | 0 | 0 | 0 |
| <i>Hipposideros_galeritus</i>   | 0 | 0 | 0 | 0 |
| <i>Hipposideros_gigas</i>       | 0 | 0 | 0 | 0 |
| <i>Hipposideros_grandis</i>     | 0 | 0 | 0 | 0 |
| <i>Hipposideros_halophyllus</i> | 0 | 0 | 0 | 0 |
| <i>Hipposideros_jonesi</i>      | 0 | 0 | 0 | 0 |
| <i>Hipposideros_lankadiva</i>   | 0 | 0 | 0 | 0 |
| <i>Hipposideros_larvatus</i>    | 0 | 0 | 0 | 0 |
| <i>Hipposideros_leyi</i>        | 0 | 0 | 0 | 0 |
| <i>Hipposideros_obscurus</i>    | 0 | 0 | 0 | 0 |
| <i>Hipposideros_pelingensis</i> | 0 | 0 | 0 | 0 |
| <i>Hipposideros_pomona</i>      | 0 | 0 | 0 | 0 |
| <i>Hipposideros_pratti</i>      | 0 | 0 | 0 | 0 |
| <i>Hipposideros_ridleyi</i>     | 0 | 0 | 0 | 0 |
| <i>Hipposideros_ruber</i>       | 0 | 0 | 0 | 0 |
| <i>Hipposideros_speoris</i>     | 0 | 0 | 0 | 0 |
| <i>Hipposideros_turpis</i>      | 0 | 0 | 0 | 0 |
| <i>Hippotragus_equinus</i>      | 0 | 0 | 0 | 0 |
| <i>Hippotragus_niger</i>        | 0 | 0 | 0 | 0 |
| <i>Histiotus_macrotus</i>       | 0 | 0 | 0 | 0 |
| <i>Histiotus_magellanicus</i>   | 0 | 0 | 0 | 0 |
| <i>Hodomys_alleni</i>           | 0 | 0 | 0 | 0 |
| <i>Holochilus_brasiliensis</i>  | 0 | 0 | 0 | 0 |
| <i>Holochilus_chacarius</i>     | 0 | 0 | 0 | 0 |

|                                   |   |   |   |   |
|-----------------------------------|---|---|---|---|
| <i>Holochilus_sciureus</i>        | 0 | 0 | 0 | 0 |
| <i>Homo_sapiens</i>               | 0 | 0 | 0 | 0 |
| <i>Hoolock_hoolock</i>            | 0 | 0 | 0 | 0 |
| <i>Hoolock_leuconedys</i>         | 0 | 0 | 0 | 0 |
| <i>Hoplomys_gymnurus</i>          | 0 | 0 | 0 | 0 |
| <i>Huetia_leucorhinus</i>         | 0 | 0 | 0 | 0 |
| <i>Hyaena_hyaena</i>              | 0 | 0 | 0 | 0 |
| <i>Hybomys_lunaris</i>            | 0 | 0 | 0 | 0 |
| <i>Hybomys_univittatus</i>        | 0 | 0 | 0 | 0 |
| <i>Hydrictis_maculicollis</i>     | 0 | 0 | 0 | 0 |
| <i>Hydrochoerus_hydrochaeris</i>  | 0 | 0 | 0 | 0 |
| <i>Hydromys_chrysogaster</i>      | 0 | 0 | 0 | 0 |
| <i>Hydropotes_inermis</i>         | 0 | 0 | 0 | 0 |
| <i>Hydrurga_leptonyx</i>          | 0 | 0 | 0 | 0 |
| <i>Hyemoschus_aquaticus</i>       | 0 | 0 | 0 | 0 |
| <i>Hylaeamys_laticeps</i>         | 0 | 0 | 0 | 0 |
| <i>Hylaeamys_megacephalus</i>     | 0 | 0 | 0 | 0 |
| <i>Hylaeamys_perenensis</i>       | 0 | 0 | 0 | 0 |
| <i>Hylaeamys_yunganus</i>         | 0 | 0 | 0 | 0 |
| <i>Hylobates_agilis</i>           | 0 | 0 | 0 | 0 |
| <i>Hylobates_alibarbis</i>        | 0 | 0 | 0 | 0 |
| <i>Hylobates_klossii</i>          | 0 | 0 | 0 | 0 |
| <i>Hylobates_lar</i>              | 0 | 0 | 0 | 0 |
| <i>Hylobates_moloch</i>           | 0 | 0 | 0 | 0 |
| <i>Hylobates_muelleri</i>         | 0 | 0 | 0 | 0 |
| <i>Hylobates_pileatus</i>         | 0 | 0 | 0 | 0 |
| <i>Hylochoerus_meinertzhageni</i> | 0 | 0 | 0 | 0 |
| <i>Hylomys_parvus</i>             | 0 | 0 | 0 | 0 |
| <i>Hylomys_suillus</i>            | 0 | 0 | 0 | 0 |
| <i>Hylomyscus_aeta</i>            | 0 | 0 | 0 | 0 |
| <i>Hylomyscus_alleni</i>          | 0 | 0 | 0 | 0 |
| <i>Hylomyscus_baeri</i>           | 0 | 0 | 0 | 0 |
| <i>Hylomyscus_denniae</i>         | 0 | 0 | 0 | 0 |
| <i>Hylomyscus_parvus</i>          | 0 | 0 | 0 | 0 |
| <i>Hylomyscus_stella</i>          | 0 | 0 | 0 | 0 |
| <i>Hylonycteris_underwoodi</i>    | 0 | 0 | 0 | 0 |
| <i>Hylopetes_alboniger</i>        | 0 | 0 | 0 | 0 |
| <i>Hylopetes_lepidus</i>          | 0 | 0 | 0 | 0 |
| <i>Hylopetes_nigripes</i>         | 0 | 0 | 0 | 0 |
| <i>Hylopetes_phayrei</i>          | 0 | 0 | 0 | 0 |
| <i>Hylopetes_spadiceus</i>        | 0 | 0 | 0 | 0 |
| <i>Hyomys_goliath</i>             | 0 | 0 | 0 | 0 |
| <i>Hyosciurus_heinrichi</i>       | 0 | 0 | 0 | 0 |
| <i>Hyperoodon_ampullatus</i>      | 0 | 0 | 0 | 0 |

|                                   |   |   |   |   |
|-----------------------------------|---|---|---|---|
| <i>Hyperoodon_planifrons</i>      | 0 | 0 | 0 | 0 |
| <i>Hypogeomys_antimena</i>        | 0 | 0 | 0 | 0 |
| <i>Hypsignathus_monstrosus</i>    | 0 | 0 | 0 | 0 |
| <i>Hypsugo_ariel</i>              | 0 | 0 | 0 | 0 |
| <i>Hypsugo_cadornae</i>           | 0 | 0 | 0 | 0 |
| <i>Hypsugo_eisentrauti</i>        | 0 | 0 | 0 | 0 |
| <i>Hypsugo_pulveratus</i>         | 0 | 0 | 0 | 0 |
| <i>Hypsugo_savii</i>              | 0 | 0 | 0 | 0 |
| <i>Hystrix_africaeaustralis</i>   | 0 | 0 | 0 | 0 |
| <i>Hystrix_brachyurus</i>         | 0 | 0 | 0 | 0 |
| <i>Hystrix_cristata</i>           | 0 | 0 | 0 | 0 |
| <i>Hystrix_indica</i>             | 0 | 0 | 0 | 0 |
| <i>Ia_io</i>                      | 0 | 0 | 0 | 0 |
| <i>Ichneumia_albicauda</i>        | 0 | 0 | 0 | 0 |
| <i>Ictidomys_mexicanus</i>        | 0 | 0 | 0 | 0 |
| <i>Ictidomys_tridecemlineatus</i> | 0 | 0 | 0 | 0 |
| <i>Ictonyx_libyca</i>             | 0 | 0 | 0 | 0 |
| <i>Ictonyx_striatus</i>           | 0 | 0 | 0 | 0 |
| <i>Idionycteris_phyllotis</i>     | 0 | 0 | 0 | 0 |
| <i>Idiurus_macrotis</i>           | 0 | 0 | 0 | 0 |
| <i>Indopacetus_pacificus</i>      | 0 | 0 | 0 | 0 |
| <i>Indri_indri</i>                | 0 | 0 | 0 | 0 |
| <i>Inia_geoffrensis</i>           | 0 | 0 | 0 | 0 |
| <i>Iomys_horsfieldi</i>           | 0 | 0 | 0 | 0 |
| <i>Irenomys_tarsalis</i>          | 0 | 0 | 0 | 0 |
| <i>Isothrix_barbarabrownae</i>    | 0 | 0 | 0 | 0 |
| <i>Isothrix_bistriata</i>         | 0 | 0 | 0 | 0 |
| <i>Isothrix_negrensis</i>         | 0 | 0 | 0 | 0 |
| <i>Isothrix_pagurus</i>           | 0 | 0 | 0 | 0 |
| <i>Isothrix_sinnamariensis</i>    | 0 | 0 | 0 | 0 |
| <i>Isthmomys_pirrensis</i>        | 0 | 0 | 0 | 0 |
| <i>Jaculus_jaculus</i>            | 0 | 0 | 0 | 0 |
| <i>Jaculus_orientalis</i>         | 0 | 0 | 0 | 0 |
| <i>Juliomys_pictipes</i>          | 0 | 0 | 0 | 0 |
| <i>Kannabateomys_amblyonyx</i>    | 0 | 0 | 0 | 0 |
| <i>Kerivoula_hardwickii</i>       | 0 | 0 | 0 | 0 |
| <i>Kerivoula_intermedia</i>       | 0 | 0 | 0 | 0 |
| <i>Kerivoula_kachinensis</i>      | 0 | 0 | 0 | 0 |
| <i>Kerivoula_lenis</i>            | 0 | 0 | 0 | 0 |
| <i>Kerivoula_minuta</i>           | 0 | 0 | 0 | 0 |
| <i>Kerivoula_papillosa</i>        | 0 | 0 | 0 | 0 |
| <i>Kerivoula_pellucida</i>        | 0 | 0 | 0 | 0 |
| <i>Kerivoula_picta</i>            | 0 | 0 | 0 | 0 |
| <i>Kerivoula_whiteheadi</i>       | 0 | 0 | 0 | 0 |



|                                   |   |   |   |   |
|-----------------------------------|---|---|---|---|
| <i>Kerodon rupestris</i>          | 0 | 0 | 0 | 0 |
| <i>Kobus ellipsiprymnus</i>       | 0 | 0 | 0 | 0 |
| <i>Kobus kob</i>                  | 0 | 0 | 0 | 0 |
| <i>Kobus leche</i>                | 0 | 0 | 0 | 0 |
| <i>Kobus megaceros</i>            | 0 | 0 | 0 | 0 |
| <i>Kogia breviceps</i>            | 0 | 0 | 0 | 0 |
| <i>Kogia sima</i>                 | 0 | 0 | 0 | 0 |
| <i>Kunsia tomentosus</i>          | 0 | 0 | 0 | 0 |
| <i>Laephotis botswanae</i>        | 0 | 0 | 0 | 0 |
| <i>Laephotis namibensis</i>       | 0 | 0 | 0 | 0 |
| <i>Laephotis wintoni</i>          | 0 | 0 | 0 | 0 |
| <i>Lagenodelphis hosei</i>        | 0 | 0 | 0 | 0 |
| <i>Lagenorhynchus acutus</i>      | 0 | 0 | 0 | 0 |
| <i>Lagenorhynchus albirostris</i> | 0 | 0 | 0 | 0 |
| <i>Lagenorhynchus australis</i>   | 0 | 0 | 0 | 0 |
| <i>Lagenorhynchus cruciger</i>    | 0 | 0 | 0 | 0 |
| <i>Lagenorhynchus obliquidens</i> | 0 | 0 | 0 | 0 |
| <i>Lagenorhynchus obscurus</i>    | 0 | 0 | 0 | 0 |
| <i>Lagidium peruanum</i>          | 0 | 0 | 0 | 0 |
| <i>Lagidium viscacia</i>          | 0 | 0 | 0 | 0 |
| <i>Lagidium wolffsohni</i>        | 0 | 0 | 0 | 0 |
| <i>Lagostomus maximus</i>         | 0 | 0 | 0 | 0 |
| <i>Lagothrix cana</i>             | 0 | 0 | 0 | 0 |
| <i>Lagothrix lagotricha</i>       | 0 | 0 | 0 | 0 |
| <i>Lagothrix lugens</i>           | 0 | 0 | 0 | 0 |
| <i>Lagothrix poeppigii</i>        | 0 | 0 | 0 | 0 |
| <i>Lagurus lagurus</i>            | 0 | 0 | 0 | 0 |
| <i>Lama glama</i>                 | 0 | 0 | 0 | 0 |
| <i>Lama guanicoe</i>              | 0 | 0 | 0 | 0 |
| <i>Laonastes aenigmamus</i>       | 0 | 0 | 0 | 0 |
| <i>Lariscus insignis</i>          | 0 | 0 | 0 | 0 |
| <i>Lasionycteris noctivagans</i>  | 0 | 0 | 0 | 0 |
| <i>Lasiopodomys brandtii</i>      | 0 | 0 | 0 | 0 |
| <i>Lasiopodomys fuscus</i>        | 0 | 0 | 0 | 0 |
| <i>Lasiopodomys mandarinus</i>    | 0 | 0 | 0 | 0 |
| <i>Lasiurus atratus</i>           | 0 | 0 | 0 | 0 |
| <i>Lasiurus blossevillii</i>      | 0 | 0 | 0 | 0 |
| <i>Lasiurus borealis</i>          | 0 | 0 | 0 | 0 |
| <i>Lasiurus cinereus</i>          | 0 | 0 | 0 | 0 |
| <i>Lasiurus ega</i>               | 0 | 0 | 0 | 0 |
| <i>Lasiurus egregius</i>          | 0 | 0 | 0 | 0 |
| <i>Lasiurus intermedius</i>       | 0 | 0 | 0 | 0 |
| <i>Lasiurus seminolus</i>         | 0 | 0 | 0 | 0 |
| <i>Lasiurus xanthinus</i>         | 0 | 0 | 0 | 0 |

|                                   |   |   |   |   |
|-----------------------------------|---|---|---|---|
| <i>Latidens_salimalii</i>         | 0 | 0 | 0 | 0 |
| <i>Leggadina_forresti</i>         | 0 | 0 | 0 | 0 |
| <i>Leggadina_lakedownensis</i>    | 0 | 0 | 0 | 0 |
| <i>Lemmiscus_curtatus</i>         | 0 | 0 | 0 | 0 |
| <i>Lemmus_amurensis</i>           | 0 | 0 | 0 | 0 |
| <i>Lemmus_lemmus</i>              | 0 | 0 | 0 | 0 |
| <i>Lemmus_sibiricus</i>           | 0 | 0 | 0 | 0 |
| <i>Lemmus_trimucronatus</i>       | 0 | 0 | 0 | 0 |
| <i>Lemniscomys_barbarus</i>       | 0 | 0 | 0 | 0 |
| <i>Lemniscomys_bellieri</i>       | 0 | 0 | 0 | 0 |
| <i>Lemniscomys_griselda</i>       | 0 | 0 | 0 | 0 |
| <i>Lemniscomys_macculus</i>       | 0 | 0 | 0 | 0 |
| <i>Lemniscomys_rosalia</i>        | 0 | 0 | 0 | 0 |
| <i>Lemniscomys_striatus</i>       | 0 | 0 | 0 | 0 |
| <i>Lemniscomys_zebra</i>          | 0 | 0 | 0 | 0 |
| <i>Lemur_catta</i>                | 0 | 0 | 0 | 0 |
| <i>Lenoxus_apicalis</i>           | 0 | 0 | 0 | 0 |
| <i>Leontopithecus_chrysomelas</i> | 0 | 0 | 0 | 0 |
| <i>Leontopithecus_chrysopygus</i> | 0 | 0 | 0 | 0 |
| <i>Leontopithecus_rosalia</i>     | 0 | 0 | 0 | 0 |
| <i>Leopardus_colocolo</i>         | 0 | 0 | 0 | 0 |
| <i>Leopardus_geoffroyi</i>        | 0 | 0 | 0 | 0 |
| <i>Leopardus_guigna</i>           | 0 | 0 | 0 | 0 |
| <i>Leopardus_jacobita</i>         | 0 | 0 | 0 | 0 |
| <i>Leopardus_pardalis</i>         | 0 | 0 | 0 | 0 |
| <i>Leopardus_tigrinus</i>         | 0 | 0 | 0 | 0 |
| <i>Leopardus_wiedii</i>           | 0 | 0 | 0 | 0 |
| <i>Leopoldamys_edwardsi</i>       | 0 | 0 | 0 | 0 |
| <i>Leopoldamys_neilli</i>         | 0 | 0 | 0 | 0 |
| <i>Leopoldamys_sabanus</i>        | 0 | 0 | 0 | 0 |
| <i>Lepilemur_ankaranensis</i>     | 0 | 0 | 0 | 0 |
| <i>Lepilemur_dorsalis</i>         | 0 | 0 | 0 | 0 |
| <i>Lepilemur_edwardsi</i>         | 0 | 0 | 0 | 0 |
| <i>Lepilemur_jamesi</i>           | 0 | 0 | 0 | 0 |
| <i>Lepilemur_leucopus</i>         | 0 | 0 | 0 | 0 |
| <i>Lepilemur_microdon</i>         | 0 | 0 | 0 | 0 |
| <i>Lepilemur_mustelinus</i>       | 0 | 0 | 0 | 0 |
| <i>Lepilemur_ruficaudatus</i>     | 0 | 0 | 0 | 0 |
| <i>Lepilemur_septentrionalis</i>  | 0 | 0 | 0 | 0 |
| <i>Leporillus_conditor</i>        | 0 | 0 | 0 | 0 |
| <i>Leptailurus_serval</i>         | 0 | 0 | 0 | 0 |
| <i>Leptomys_elegans</i>           | 0 | 0 | 0 | 0 |
| <i>Leptonychotes_weddellii</i>    | 0 | 0 | 0 | 0 |
| <i>Leptonycteris_curasoeae</i>    | 0 | 0 | 0 | 0 |

|                                       |   |   |   |   |
|---------------------------------------|---|---|---|---|
| <i>Leptonycteris_nivalis</i>          | 0 | 0 | 0 | 0 |
| <i>Leptonycteris_yerbabuenae</i>      | 0 | 0 | 0 | 0 |
| <i>Lepus_alleni</i>                   | 0 | 0 | 0 | 0 |
| <i>Lepus_americanus</i>               | 0 | 0 | 0 | 0 |
| <i>Lepus_arcticus</i>                 | 0 | 0 | 0 | 0 |
| <i>Lepus_brachyurus</i>               | 0 | 0 | 0 | 0 |
| <i>Lepus_californicus</i>             | 0 | 0 | 0 | 0 |
| <i>Lepus_callotis</i>                 | 0 | 0 | 0 | 0 |
| <i>Lepus_capensis</i>                 | 0 | 0 | 0 | 0 |
| <i>Lepus_castroviejoii</i>            | 0 | 0 | 0 | 0 |
| <i>Lepus_comus</i>                    | 0 | 0 | 0 | 0 |
| <i>Lepus_coreanus</i>                 | 0 | 0 | 0 | 0 |
| <i>Lepus_corsicanus</i>               | 0 | 0 | 0 | 0 |
| <i>Lepus_europaeus</i>                | 0 | 0 | 0 | 0 |
| <i>Lepus_flavigularis</i>             | 0 | 0 | 0 | 0 |
| <i>Lepus_granatensis</i>              | 0 | 0 | 0 | 0 |
| <i>Lepus_habessinicus</i>             | 0 | 0 | 0 | 0 |
| <i>Lepus_hainanus</i>                 | 0 | 0 | 0 | 0 |
| <i>Lepus_insularis</i>                | 0 | 0 | 0 | 0 |
| <i>Lepus_mandshuricus</i>             | 0 | 0 | 0 | 0 |
| <i>Lepus_oioostolus</i>               | 0 | 0 | 0 | 0 |
| <i>Lepus_othus</i>                    | 0 | 0 | 0 | 0 |
| <i>Lepus_saxatilis</i>                | 0 | 0 | 0 | 0 |
| <i>Lepus_sinensis</i>                 | 0 | 0 | 0 | 0 |
| <i>Lepus_starcki</i>                  | 0 | 0 | 0 | 0 |
| <i>Lepus_timidus</i>                  | 0 | 0 | 0 | 0 |
| <i>Lepus_timidus_x_Lepus_europeus</i> | 0 | 0 | 0 | 0 |
| <i>Lepus_tolai</i>                    | 0 | 0 | 0 | 0 |
| <i>Lepus_townsendii</i>               | 0 | 0 | 0 | 0 |
| <i>Lepus_yarkandensis</i>             | 0 | 0 | 0 | 0 |
| <i>Liberiictis_kuhni</i>              | 0 | 0 | 0 | 0 |
| <i>Lichonycteris_obscura</i>          | 0 | 0 | 0 | 0 |
| <i>Limnogale_mergulus</i>             | 0 | 0 | 0 | 0 |
| <i>Limnomys_sibuanus</i>              | 0 | 0 | 0 | 0 |
| <i>Liomys_adspersus</i>               | 0 | 0 | 0 | 0 |
| <i>Liomys_irroratus</i>               | 0 | 0 | 0 | 0 |
| <i>Liomys_pictus</i>                  | 0 | 0 | 0 | 0 |
| <i>Liomys_salvini</i>                 | 0 | 0 | 0 | 0 |
| <i>Liomys_spectabilis</i>             | 0 | 0 | 0 | 0 |
| <i>Lionycteris_spurrelli</i>          | 0 | 0 | 0 | 0 |
| <i>Lipotes_vexillifer</i>             | 0 | 0 | 0 | 0 |
| <i>Lissodelphis_borealis</i>          | 0 | 0 | 0 | 0 |
| <i>Lissodelphis_peronii</i>           | 0 | 0 | 0 | 0 |
| <i>Litocranius_walleri</i>            | 0 | 0 | 0 | 0 |

|                                  |   |   |   |   |
|----------------------------------|---|---|---|---|
| <i>Lobodon_carcinophaga</i>      | 0 | 0 | 0 | 0 |
| <i>Lonchophylla_handleyi</i>     | 0 | 0 | 0 | 0 |
| <i>Lonchophylla_mordax</i>       | 0 | 0 | 0 | 0 |
| <i>Lonchophylla_robusta</i>      | 0 | 0 | 0 | 0 |
| <i>Lonchophylla_thomasi</i>      | 0 | 0 | 0 | 0 |
| <i>Lonchorhina_aurita</i>        | 0 | 0 | 0 | 0 |
| <i>Lonchorhina_orinocensis</i>   | 0 | 0 | 0 | 0 |
| <i>Lonchothrix_emiliae</i>       | 0 | 0 | 0 | 0 |
| <i>Lontra_canadensis</i>         | 0 | 0 | 0 | 0 |
| <i>Lontra_felina</i>             | 0 | 0 | 0 | 0 |
| <i>Lontra_longicaudis</i>        | 0 | 0 | 0 | 0 |
| <i>Lontra_provocax</i>           | 0 | 0 | 0 | 0 |
| <i>Lophiomys_inhausi</i>         | 0 | 0 | 0 | 0 |
| <i>Lophocebus_albigena</i>       | 0 | 0 | 0 | 0 |
| <i>Lophocebus_aterrimus</i>      | 0 | 0 | 0 | 0 |
| <i>Lophostoma_brasiliense</i>    | 0 | 0 | 0 | 0 |
| <i>Lophostoma_carrikeri</i>      | 0 | 0 | 0 | 0 |
| <i>Lophostoma_evotis</i>         | 0 | 0 | 0 | 0 |
| <i>Lophostoma_schulzi</i>        | 0 | 0 | 0 | 0 |
| <i>Lophostoma_silvicolum</i>     | 0 | 0 | 0 | 0 |
| <i>Lophuromys_brevicaudus</i>    | 0 | 0 | 0 | 0 |
| <i>Lophuromys_chrysopus</i>      | 0 | 0 | 0 | 0 |
| <i>Lophuromys_flavopunctatus</i> | 0 | 0 | 0 | 0 |
| <i>Lophuromys_melanonyx</i>      | 0 | 0 | 0 | 0 |
| <i>Lophuromys_sikapusi</i>       | 0 | 0 | 0 | 0 |
| <i>Lophuromys_woosnami</i>       | 0 | 0 | 0 | 0 |
| <i>Lorentzimys_nouhuysi</i>      | 0 | 0 | 0 | 0 |
| <i>Loris_lydekkerianus</i>       | 0 | 0 | 0 | 0 |
| <i>Loris_tardigradus</i>         | 0 | 0 | 0 | 0 |
| <i>Loxodonta_africana</i>        | 0 | 0 | 0 | 0 |
| <i>Loxodonta_cyclotis</i>        | 0 | 0 | 0 | 0 |
| <i>Lundomys_molitor</i>          | 0 | 0 | 0 | 0 |
| <i>Lutra_lutra</i>               | 0 | 0 | 0 | 0 |
| <i>Lutra_sumatrana</i>           | 0 | 0 | 0 | 0 |
| <i>Lutrogale_perspicillata</i>   | 0 | 0 | 0 | 0 |
| <i>Lycalopex_culpaeus</i>        | 0 | 0 | 0 | 0 |
| <i>Lycalopex_fulvipes</i>        | 0 | 0 | 0 | 0 |
| <i>Lycalopex_griseus</i>         | 0 | 0 | 0 | 0 |
| <i>Lycalopex_gymnocercus</i>     | 0 | 0 | 0 | 0 |
| <i>Lycalopex_sechurae</i>        | 0 | 0 | 0 | 0 |
| <i>Lycalopex_vetulus</i>         | 0 | 0 | 0 | 0 |
| <i>Lycaon_pictus</i>             | 0 | 0 | 0 | 0 |
| <i>Lyncodon_patagonicus</i>      | 0 | 0 | 0 | 0 |
| <i>Lynx_canadensis</i>           | 0 | 0 | 0 | 0 |

|                                     |   |   |   |   |
|-------------------------------------|---|---|---|---|
| <i>Lynx lynx</i>                    | 0 | 0 | 0 | 0 |
| <i>Lynx pardinus</i>                | 0 | 0 | 0 | 0 |
| <i>Lynx rufus</i>                   | 0 | 0 | 0 | 0 |
| <i>Macaca arctoides</i>             | 0 | 0 | 0 | 0 |
| <i>Macaca assamensis</i>            | 0 | 0 | 0 | 0 |
| <i>Macaca cyclopis</i>              | 0 | 0 | 0 | 0 |
| <i>Macaca fascicularis</i>          | 0 | 0 | 0 | 0 |
| <i>Macaca fuscata</i>               | 0 | 0 | 0 | 0 |
| <i>Macaca hecki</i>                 | 0 | 0 | 0 | 0 |
| <i>Macaca leonina</i>               | 0 | 0 | 0 | 0 |
| <i>Macaca maura</i>                 | 0 | 0 | 0 | 0 |
| <i>Macaca mulatta</i>               | 0 | 0 | 0 | 0 |
| <i>Macaca munzala</i>               | 0 | 0 | 0 | 0 |
| <i>Macaca nemestrina</i>            | 0 | 0 | 0 | 0 |
| <i>Macaca nigra</i>                 | 0 | 0 | 0 | 0 |
| <i>Macaca nigrescens</i>            | 0 | 0 | 0 | 0 |
| <i>Macaca ochreata</i>              | 0 | 0 | 0 | 0 |
| <i>Macaca pagensis</i>              | 0 | 0 | 0 | 0 |
| <i>Macaca radiata</i>               | 0 | 0 | 0 | 0 |
| <i>Macaca siberu</i>                | 0 | 0 | 0 | 0 |
| <i>Macaca silenus</i>               | 0 | 0 | 0 | 0 |
| <i>Macaca sinica</i>                | 0 | 0 | 0 | 0 |
| <i>Macaca sylvanus</i>              | 0 | 0 | 0 | 0 |
| <i>Macaca thibetana</i>             | 0 | 0 | 0 | 0 |
| <i>Macaca tonkeana</i>              | 0 | 0 | 0 | 0 |
| <i>Macroderma gigas</i>             | 0 | 0 | 0 | 0 |
| <i>Macrogalidia musschenbroekii</i> | 0 | 0 | 0 | 0 |
| <i>Macroglossus minimus</i>         | 0 | 0 | 0 | 0 |
| <i>Macroglossus sobrinus</i>        | 0 | 0 | 0 | 0 |
| <i>Macrophyllum macrophyllum</i>    | 0 | 0 | 0 | 0 |
| <i>Macroscelides proboscideus</i>   | 0 | 0 | 0 | 0 |
| <i>Macrotarsomys bastardi</i>       | 0 | 0 | 0 | 0 |
| <i>Macrotarsomys ingens</i>         | 0 | 0 | 0 | 0 |
| <i>Macrotus californicus</i>        | 0 | 0 | 0 | 0 |
| <i>Macrotus waterhousii</i>         | 0 | 0 | 0 | 0 |
| <i>Macruromys major</i>             | 0 | 0 | 0 | 0 |
| <i>Madoqua guentheri</i>            | 0 | 0 | 0 | 0 |
| <i>Madoqua kirkii</i>               | 0 | 0 | 0 | 0 |
| <i>Madoqua saltiana</i>             | 0 | 0 | 0 | 0 |
| <i>Makalata didelphoides</i>        | 0 | 0 | 0 | 0 |
| <i>Makalata grandis</i>             | 0 | 0 | 0 | 0 |
| <i>Makalata macrura</i>             | 0 | 0 | 0 | 0 |
| <i>Malacomys cansdalei</i>          | 0 | 0 | 0 | 0 |
| <i>Malacomys edwardsi</i>           | 0 | 0 | 0 | 0 |

|                                  |   |   |   |   |
|----------------------------------|---|---|---|---|
| <i>Malacomys_longipes</i>        | 0 | 0 | 0 | 0 |
| <i>Malacothrix_typica</i>        | 0 | 0 | 0 | 0 |
| <i>Mallomys_rothschildi</i>      | 0 | 0 | 0 | 0 |
| <i>Mammelomys_lanosus</i>        | 0 | 0 | 0 | 0 |
| <i>Mammelomys_rattoides</i>      | 0 | 0 | 0 | 0 |
| <i>Mammut_americanum</i>         | 0 | 0 | 0 | 0 |
| <i>Mammuthus_primigenius</i>     | 0 | 0 | 0 | 0 |
| <i>Mandrillus_leucophaeus</i>    | 0 | 0 | 0 | 0 |
| <i>Mandrillus_sphinx</i>         | 0 | 0 | 0 | 0 |
| <i>Manis_javanica</i>            | 0 | 0 | 0 | 0 |
| <i>Manis_pentadactyla</i>        | 0 | 0 | 0 | 0 |
| <i>Manis_temminckii</i>          | 0 | 0 | 0 | 0 |
| <i>Manis_tetradactyla</i>        | 0 | 0 | 0 | 0 |
| <i>Manis_tricuspis</i>           | 0 | 0 | 0 | 0 |
| <i>Marmota_baibacina</i>         | 0 | 0 | 0 | 0 |
| <i>Marmota_bobak</i>             | 0 | 0 | 0 | 0 |
| <i>Marmota_broweri</i>           | 0 | 0 | 0 | 0 |
| <i>Marmota_caligata</i>          | 0 | 0 | 0 | 0 |
| <i>Marmota_camtschatica</i>      | 0 | 0 | 0 | 0 |
| <i>Marmota_caudata</i>           | 0 | 0 | 0 | 0 |
| <i>Marmota_flaviventris</i>      | 0 | 0 | 0 | 0 |
| <i>Marmota_himalayana</i>        | 0 | 0 | 0 | 0 |
| <i>Marmota_marmota</i>           | 0 | 0 | 0 | 0 |
| <i>Marmota_menzbieri</i>         | 0 | 0 | 0 | 0 |
| <i>Marmota_monax</i>             | 0 | 0 | 0 | 0 |
| <i>Marmota_olympus</i>           | 0 | 0 | 0 | 0 |
| <i>Marmota_sibirica</i>          | 0 | 0 | 0 | 0 |
| <i>Marmota_vancouverensis</i>    | 0 | 0 | 0 | 0 |
| <i>Martes_americana</i>          | 0 | 0 | 0 | 0 |
| <i>Martes_flavigula</i>          | 0 | 0 | 0 | 0 |
| <i>Martes_foina</i>              | 0 | 0 | 0 | 0 |
| <i>Martes_martes</i>             | 0 | 0 | 0 | 0 |
| <i>Martes_melampus</i>           | 0 | 0 | 0 | 0 |
| <i>Martes_pennanti</i>           | 0 | 0 | 0 | 0 |
| <i>Martes_zibellina</i>          | 0 | 0 | 0 | 0 |
| <i>Massoutiera_mzabi</i>         | 0 | 0 | 0 | 0 |
| <i>Mastacomys_fuscus</i>         | 0 | 0 | 0 | 0 |
| <i>Mastomys_awashensis</i>       | 0 | 0 | 0 | 0 |
| <i>Mastomys_coucha</i>           | 0 | 0 | 0 | 0 |
| <i>Mastomys_erythroleucus</i>    | 0 | 0 | 0 | 0 |
| <i>Mastomys_huberti</i>          | 0 | 0 | 0 | 0 |
| <i>Mastomys_kollmannspergeri</i> | 0 | 0 | 0 | 0 |
| <i>Mastomys_natalensis</i>       | 0 | 0 | 0 | 0 |
| <i>Mastomys_pernanus</i>         | 0 | 0 | 0 | 0 |

|                                |   |   |   |   |
|--------------------------------|---|---|---|---|
| <i>Mastomys_verheyeni</i>      | 0 | 0 | 0 | 0 |
| <i>Maxomys_bartelsii</i>       | 0 | 0 | 0 | 0 |
| <i>Maxomys_hellwaldii</i>      | 0 | 0 | 0 | 0 |
| <i>Maxomys_moi</i>             | 0 | 0 | 0 | 0 |
| <i>Maxomys_musschenbroekii</i> | 0 | 0 | 0 | 0 |
| <i>Maxomys_ochraceiventer</i>  | 0 | 0 | 0 | 0 |
| <i>Maxomys_pagensis</i>        | 0 | 0 | 0 | 0 |
| <i>Maxomys_rajah</i>           | 0 | 0 | 0 | 0 |
| <i>Maxomys_surifer</i>         | 0 | 0 | 0 | 0 |
| <i>Maxomys_wattsi</i>          | 0 | 0 | 0 | 0 |
| <i>Maxomys_whiteheadi</i>      | 0 | 0 | 0 | 0 |
| <i>Mazama_americana</i>        | 0 | 0 | 0 | 0 |
| <i>Mazama_bororo</i>           | 0 | 0 | 0 | 0 |
| <i>Mazama_gouazoupira</i>      | 0 | 0 | 0 | 0 |
| <i>Mazama_nana</i>             | 0 | 0 | 0 | 0 |
| <i>Mazama_nemorivaga</i>       | 0 | 0 | 0 | 0 |
| <i>Mazama_rufina</i>           | 0 | 0 | 0 | 0 |
| <i>Mazama_sp.</i>              | 0 | 0 | 0 | 0 |
| <i>Megaderma_lyra</i>          | 0 | 0 | 0 | 0 |
| <i>Megaderma_spasma</i>        | 0 | 0 | 0 | 0 |
| <i>Megadontomys_cryophilus</i> | 0 | 0 | 0 | 0 |
| <i>Megadontomys_nelsoni</i>    | 0 | 0 | 0 | 0 |
| <i>Megadontomys_thomasi</i>    | 0 | 0 | 0 | 0 |
| <i>Megaerops_ecaudatus</i>     | 0 | 0 | 0 | 0 |
| <i>Megaerops_kusnotoi</i>      | 0 | 0 | 0 | 0 |
| <i>Megaerops_niphanae</i>      | 0 | 0 | 0 | 0 |
| <i>Megaerops_wetmorei</i>      | 0 | 0 | 0 | 0 |
| <i>Megaloceros_giganteus</i>   | 0 | 0 | 0 | 0 |
| <i>Megaloglossus_woermanni</i> | 0 | 0 | 0 | 0 |
| <i>Megaptera_novaeangliae</i>  | 0 | 0 | 0 | 0 |
| <i>Megasorex_gigas</i>         | 0 | 0 | 0 | 0 |
| <i>Melanomys_caliginosus</i>   | 0 | 0 | 0 | 0 |
| <i>Melasmothrix_naso</i>       | 0 | 0 | 0 | 0 |
| <i>Meles_anakuma</i>           | 0 | 0 | 0 | 0 |
| <i>Meles_leucurus</i>          | 0 | 0 | 0 | 0 |
| <i>Meles_meles</i>             | 0 | 0 | 0 | 0 |
| <i>Mellivora_capensis</i>      | 0 | 0 | 0 | 0 |
| <i>Melogale_moschata</i>       | 0 | 0 | 0 | 0 |
| <i>Melogale_personata</i>      | 0 | 0 | 0 | 0 |
| <i>Melomys_burtoni</i>         | 0 | 0 | 0 | 0 |
| <i>Melomys_capensis</i>        | 0 | 0 | 0 | 0 |
| <i>Melomys_cervinipes</i>      | 0 | 0 | 0 | 0 |
| <i>Melomys_leucogaster</i>     | 0 | 0 | 0 | 0 |
| <i>Melomys_lutillus</i>        | 0 | 0 | 0 | 0 |

|                                    |   |   |   |   |
|------------------------------------|---|---|---|---|
| <i>Melomys_rubicola</i>            | 0 | 0 | 0 | 0 |
| <i>Melomys_rufescens</i>           | 0 | 0 | 0 | 0 |
| <i>Melomys_sp._LMB-2011</i>        | 0 | 0 | 0 | 0 |
| <i>Melonycteris_melanops</i>       | 0 | 0 | 0 | 0 |
| <i>Melonycteris_woodfordi</i>      | 0 | 0 | 0 | 0 |
| <i>Melursus_ursinus</i>            | 0 | 0 | 0 | 0 |
| <i>Menetes_berdmorei</i>           | 0 | 0 | 0 | 0 |
| <i>Mephitis_macroura</i>           | 0 | 0 | 0 | 0 |
| <i>Mephitis_mephitis</i>           | 0 | 0 | 0 | 0 |
| <i>Meriones_chengi</i>             | 0 | 0 | 0 | 0 |
| <i>Meriones_crassus</i>            | 0 | 0 | 0 | 0 |
| <i>Meriones_libycus</i>            | 0 | 0 | 0 | 0 |
| <i>Meriones_meridianus</i>         | 0 | 0 | 0 | 0 |
| <i>Meriones_rex</i>                | 0 | 0 | 0 | 0 |
| <i>Meriones_shawi</i>              | 0 | 0 | 0 | 0 |
| <i>Meriones_sp._Garat_An_Njila</i> | 0 | 0 | 0 | 0 |
| <i>Meriones_tamariscinus</i>       | 0 | 0 | 0 | 0 |
| <i>Meriones_tristrami</i>          | 0 | 0 | 0 | 0 |
| <i>Meriones_unguiculatus</i>       | 0 | 0 | 0 | 0 |
| <i>Mesechinus_dauuricus</i>        | 0 | 0 | 0 | 0 |
| <i>Mesechinus_hughi</i>            | 0 | 0 | 0 | 0 |
| <i>Mesembriomys_gouldii</i>        | 0 | 0 | 0 | 0 |
| <i>Mesembriomys_macrurus</i>       | 0 | 0 | 0 | 0 |
| <i>Mesocricetus_auratus</i>        | 0 | 0 | 0 | 0 |
| <i>Mesocricetus_brandti</i>        | 0 | 0 | 0 | 0 |
| <i>Mesocricetus_newtoni</i>        | 0 | 0 | 0 | 0 |
| <i>Mesocricetus_raddei</i>         | 0 | 0 | 0 | 0 |
| <i>Mesomys_hispidus</i>            | 0 | 0 | 0 | 0 |
| <i>Mesomys_occultus</i>            | 0 | 0 | 0 | 0 |
| <i>Mesomys_stimulax</i>            | 0 | 0 | 0 | 0 |
| <i>Mesophylla_macconnelli</i>      | 0 | 0 | 0 | 0 |
| <i>Mesoplodon_bidens</i>           | 0 | 0 | 0 | 0 |
| <i>Mesoplodon_bowdoini</i>         | 0 | 0 | 0 | 0 |
| <i>Mesoplodon_carlhubbsi</i>       | 0 | 0 | 0 | 0 |
| <i>Mesoplodon_densirostris</i>     | 0 | 0 | 0 | 0 |
| <i>Mesoplodon_europaeus</i>        | 0 | 0 | 0 | 0 |
| <i>Mesoplodon_ginkgodens</i>       | 0 | 0 | 0 | 0 |
| <i>Mesoplodon_grayi</i>            | 0 | 0 | 0 | 0 |
| <i>Mesoplodon_hectori</i>          | 0 | 0 | 0 | 0 |
| <i>Mesoplodon_layardii</i>         | 0 | 0 | 0 | 0 |
| <i>Mesoplodon_mirus</i>            | 0 | 0 | 0 | 0 |
| <i>Mesoplodon_perrini</i>          | 0 | 0 | 0 | 0 |
| <i>Mesoplodon_peruvianus</i>       | 0 | 0 | 0 | 0 |
| <i>Mesoplodon_stejnegeri</i>       | 0 | 0 | 0 | 0 |



|                                      |   |   |   |   |
|--------------------------------------|---|---|---|---|
| <i>Mesoplodon_traversii</i>          | 0 | 0 | 0 | 0 |
| <i>Micaelamys_namaquensis</i>        | 0 | 0 | 0 | 0 |
| <i>Microcavia_australis</i>          | 0 | 0 | 0 | 0 |
| <i>Microcavia_niata</i>              | 0 | 0 | 0 | 0 |
| <i>Microcebus_berthae</i>            | 0 | 0 | 0 | 0 |
| <i>Microcebus_griseorufus</i>        | 0 | 0 | 0 | 0 |
| <i>Microcebus_murinus</i>            | 0 | 0 | 0 | 0 |
| <i>Microcebus_myoxinus</i>           | 0 | 0 | 0 | 0 |
| <i>Microcebus_ravelobensis</i>       | 0 | 0 | 0 | 0 |
| <i>Microcebus_rufus</i>              | 0 | 0 | 0 | 0 |
| <i>Microcebus_sambiranensis</i>      | 0 | 0 | 0 | 0 |
| <i>Microcebus_tavaratra</i>          | 0 | 0 | 0 | 0 |
| <i>Microdipodops_megacephalus</i>    | 0 | 0 | 0 | 0 |
| <i>Microdipodops_pallidus</i>        | 0 | 0 | 0 | 0 |
| <i>Microgale_brevicaudata</i>        | 0 | 0 | 0 | 0 |
| <i>Microgale_cf._parvula</i>         | 0 | 0 | 0 | 0 |
| <i>Microgale_cowani</i>              | 0 | 0 | 0 | 0 |
| <i>Microgale_longicaudata</i>        | 0 | 0 | 0 | 0 |
| <i>Microgale_principula</i>          | 0 | 0 | 0 | 0 |
| <i>Microgale_pusilla</i>             | 0 | 0 | 0 | 0 |
| <i>Microgale_taiva</i>               | 0 | 0 | 0 | 0 |
| <i>Microgale_talazaci</i>            | 0 | 0 | 0 | 0 |
| <i>Micromys_minutus</i>              | 0 | 0 | 0 | 0 |
| <i>Micronycteris_brachyotis</i>      | 0 | 0 | 0 | 0 |
| <i>Micronycteris_brosseti</i>        | 0 | 0 | 0 | 0 |
| <i>Micronycteris_buriri</i>          | 0 | 0 | 0 | 0 |
| <i>Micronycteris_cf._schmidtorum</i> | 0 | 0 | 0 | 0 |
| <i>Micronycteris_giovanniae</i>      | 0 | 0 | 0 | 0 |
| <i>Micronycteris_hirsuta</i>         | 0 | 0 | 0 | 0 |
| <i>Micronycteris_homezi</i>          | 0 | 0 | 0 | 0 |
| <i>Micronycteris_matses</i>          | 0 | 0 | 0 | 0 |
| <i>Micronycteris_megalotis</i>       | 0 | 0 | 0 | 0 |
| <i>Micronycteris_microtis</i>        | 0 | 0 | 0 | 0 |
| <i>Micronycteris_minuta</i>          | 0 | 0 | 0 | 0 |
| <i>Micronycteris_nicefori</i>        | 0 | 0 | 0 | 0 |
| <i>Micronycteris_schmidtorum</i>     | 0 | 0 | 0 | 0 |
| <i>Micronycteris_sp._TK136752</i>    | 0 | 0 | 0 | 0 |
| <i>Micropotamogale_lamottei</i>      | 0 | 0 | 0 | 0 |
| <i>Micropteropus_pusillus</i>        | 0 | 0 | 0 | 0 |
| <i>Microryzomys_minutus</i>          | 0 | 0 | 0 | 0 |
| <i>Microsciurus_alfari</i>           | 0 | 0 | 0 | 0 |
| <i>Microsciurus_flaviventer</i>      | 0 | 0 | 0 | 0 |
| <i>Microtus_abbreviatus</i>          | 0 | 0 | 0 | 0 |
| <i>Microtus_agrestis</i>             | 0 | 0 | 0 | 0 |

|                                  |   |   |   |   |
|----------------------------------|---|---|---|---|
| <i>Microtus_arvalis</i>          | 0 | 0 | 0 | 0 |
| <i>Microtus_bavaricus</i>        | 0 | 0 | 0 | 0 |
| <i>Microtus_breweri</i>          | 0 | 0 | 0 | 0 |
| <i>Microtus_cabrerae</i>         | 0 | 0 | 0 | 0 |
| <i>Microtus_californicus</i>     | 0 | 0 | 0 | 0 |
| <i>Microtus_canicaudus</i>       | 0 | 0 | 0 | 0 |
| <i>Microtus_chrotorrhinus</i>    | 0 | 0 | 0 | 0 |
| <i>Microtus_clarkei</i>          | 0 | 0 | 0 | 0 |
| <i>Microtus_daghestanicus</i>    | 0 | 0 | 0 | 0 |
| <i>Microtus_duodecimcostatus</i> | 0 | 0 | 0 | 0 |
| <i>Microtus_evoronensis</i>      | 0 | 0 | 0 | 0 |
| <i>Microtus_felteni</i>          | 0 | 0 | 0 | 0 |
| <i>Microtus_fortis</i>           | 0 | 0 | 0 | 0 |
| <i>Microtus_gerbei</i>           | 0 | 0 | 0 | 0 |
| <i>Microtus_gregalis</i>         | 0 | 0 | 0 | 0 |
| <i>Microtus_guatemalensis</i>    | 0 | 0 | 0 | 0 |
| <i>Microtus_guentheri</i>        | 0 | 0 | 0 | 0 |
| <i>Microtus_irani</i>            | 0 | 0 | 0 | 0 |
| <i>Microtus_kikuchii</i>         | 0 | 0 | 0 | 0 |
| <i>Microtus_kirgisorum</i>       | 0 | 0 | 0 | 0 |
| <i>Microtus_levis</i>            | 0 | 0 | 0 | 0 |
| <i>Microtus_liechtensteini</i>   | 0 | 0 | 0 | 0 |
| <i>Microtus_linnophilus</i>      | 0 | 0 | 0 | 0 |
| <i>Microtus_longicaudus</i>      | 0 | 0 | 0 | 0 |
| <i>Microtus_lusitanicus</i>      | 0 | 0 | 0 | 0 |
| <i>Microtus_majori</i>           | 0 | 0 | 0 | 0 |
| <i>Microtus_maximowiczii</i>     | 0 | 0 | 0 | 0 |
| <i>Microtus_mexicanus</i>        | 0 | 0 | 0 | 0 |
| <i>Microtus_middendorffii</i>    | 0 | 0 | 0 | 0 |
| <i>Microtus_miurus</i>           | 0 | 0 | 0 | 0 |
| <i>Microtus_mongolicus</i>       | 0 | 0 | 0 | 0 |
| <i>Microtus_montanus</i>         | 0 | 0 | 0 | 0 |
| <i>Microtus_montebelli</i>       | 0 | 0 | 0 | 0 |
| <i>Microtus_mujanensis</i>       | 0 | 0 | 0 | 0 |
| <i>Microtus_multiplex</i>        | 0 | 0 | 0 | 0 |
| <i>Microtus_oaxacensis</i>       | 0 | 0 | 0 | 0 |
| <i>Microtus_ochrogaster</i>      | 0 | 0 | 0 | 0 |
| <i>Microtus_oeconomus</i>        | 0 | 0 | 0 | 0 |
| <i>Microtus_oregoni</i>          | 0 | 0 | 0 | 0 |
| <i>Microtus_pennsylvanicus</i>   | 0 | 0 | 0 | 0 |
| <i>Microtus_pinetorum</i>        | 0 | 0 | 0 | 0 |
| <i>Microtus_quasiater</i>        | 0 | 0 | 0 | 0 |
| <i>Microtus_richardsoni</i>      | 0 | 0 | 0 | 0 |
| <i>Microtus_sachalinensis</i>    | 0 | 0 | 0 | 0 |

|                                 |   |   |   |   |
|---------------------------------|---|---|---|---|
| <i>Microtus_savii</i>           | 0 | 0 | 0 | 0 |
| <i>Microtus_schelkovnikovi</i>  | 0 | 0 | 0 | 0 |
| <i>Microtus_socialis</i>        | 0 | 0 | 0 | 0 |
| <i>Microtus_subterraneus</i>    | 0 | 0 | 0 | 0 |
| <i>Microtus_tatricus</i>        | 0 | 0 | 0 | 0 |
| <i>Microtus_thomasi</i>         | 0 | 0 | 0 | 0 |
| <i>Microtus_townsendii</i>      | 0 | 0 | 0 | 0 |
| <i>Microtus_transcaspicus</i>   | 0 | 0 | 0 | 0 |
| <i>Microtus_umbrosus</i>        | 0 | 0 | 0 | 0 |
| <i>Microtus_xanthognathus</i>   | 0 | 0 | 0 | 0 |
| <i>Millardia_kathleenae</i>     | 0 | 0 | 0 | 0 |
| <i>Millardia_meltada</i>        | 0 | 0 | 0 | 0 |
| <i>Mimon_bennettii</i>          | 0 | 0 | 0 | 0 |
| <i>Mimon_cozumelae</i>          | 0 | 0 | 0 | 0 |
| <i>Mimon_crenulatum</i>         | 0 | 0 | 0 | 0 |
| <i>Mindomys_hammondi</i>        | 0 | 0 | 0 | 0 |
| <i>Miniopterus_africanus</i>    | 0 | 0 | 0 | 0 |
| <i>Miniopterus_australis</i>    | 0 | 0 | 0 | 0 |
| <i>Miniopterus_fraterculus</i>  | 0 | 0 | 0 | 0 |
| <i>Miniopterus_fuliginosus</i>  | 0 | 0 | 0 | 0 |
| <i>Miniopterus_fuscus</i>       | 0 | 0 | 0 | 0 |
| <i>Miniopterus_inflatus</i>     | 0 | 0 | 0 | 0 |
| <i>Miniopterus_macrocneme</i>   | 0 | 0 | 0 | 0 |
| <i>Miniopterus_magnater</i>     | 0 | 0 | 0 | 0 |
| <i>Miniopterus_majori</i>       | 0 | 0 | 0 | 0 |
| <i>Miniopterus_manavi</i>       | 0 | 0 | 0 | 0 |
| <i>Miniopterus_minor</i>        | 0 | 0 | 0 | 0 |
| <i>Miniopterus_natalensis</i>   | 0 | 0 | 0 | 0 |
| <i>Miniopterus_pusillus</i>     | 0 | 0 | 0 | 0 |
| <i>Miniopterus_schreibersii</i> | 0 | 0 | 0 | 0 |
| <i>Miniopterus_tristis</i>      | 0 | 0 | 0 | 0 |
| <i>Miopithecus_ogouensis</i>    | 0 | 0 | 0 | 0 |
| <i>Miopithecus_talapoin</i>     | 0 | 0 | 0 | 0 |
| <i>Mirounga_angustirostris</i>  | 0 | 0 | 0 | 0 |
| <i>Mirounga_leonina</i>         | 0 | 0 | 0 | 0 |
| <i>Mirza_coquereli</i>          | 0 | 0 | 0 | 0 |
| <i>Mogera_imaizumii</i>         | 0 | 0 | 0 | 0 |
| <i>Mogera_insularis</i>         | 0 | 0 | 0 | 0 |
| <i>Mogera_tokudae</i>           | 0 | 0 | 0 | 0 |
| <i>Mogera_wogura</i>            | 0 | 0 | 0 | 0 |
| <i>Molossops_neglectus</i>      | 0 | 0 | 0 | 0 |
| <i>Molossops_temminckii</i>     | 0 | 0 | 0 | 0 |
| <i>Molossus_sinaloae</i>        | 0 | 0 | 0 | 0 |
| <i>Monachus_monachus</i>        | 0 | 0 | 0 | 0 |

|                                 |   |   |   |   |
|---------------------------------|---|---|---|---|
| <i>Monachus_schauinslandi</i>   | 0 | 0 | 0 | 0 |
| <i>Monodon_monoceros</i>        | 0 | 0 | 0 | 0 |
| <i>Monophyllus_plethodon</i>    | 0 | 0 | 0 | 0 |
| <i>Monophyllus_redmani</i>      | 0 | 0 | 0 | 0 |
| <i>Mops_condylurus</i>          | 0 | 0 | 0 | 0 |
| <i>Mops_midas</i>               | 0 | 0 | 0 | 0 |
| <i>Mops_mops</i>                | 0 | 0 | 0 | 0 |
| <i>Mormoops_blainvillii</i>     | 0 | 0 | 0 | 0 |
| <i>Mormopterus_acetabulosus</i> | 0 | 0 | 0 | 0 |
| <i>Mormopterus_beccarii</i>     | 0 | 0 | 0 | 0 |
| <i>Mormopterus_jugularis</i>    | 0 | 0 | 0 | 0 |
| <i>Mormopterus_kalinowskii</i>  | 0 | 0 | 0 | 0 |
| <i>Mormopterus_planiceps</i>    | 0 | 0 | 0 | 0 |
| <i>Moschiola_meminna</i>        | 0 | 0 | 0 | 0 |
| <i>Moschus_berezovskii</i>      | 0 | 0 | 0 | 0 |
| <i>Moschus_chrysogaster</i>     | 0 | 0 | 0 | 0 |
| <i>Moschus_fuscus</i>           | 0 | 0 | 0 | 0 |
| <i>Moschus_leucogaster</i>      | 0 | 0 | 0 | 0 |
| <i>Moschus_moschiferus</i>      | 0 | 0 | 0 | 0 |
| <i>Mosia_nigrescens</i>         | 0 | 0 | 0 | 0 |
| <i>Mungos_mungo</i>             | 0 | 0 | 0 | 0 |
| <i>Mungotictis_decemlineata</i> | 0 | 0 | 0 | 0 |
| <i>Muntiacus_crinifrons</i>     | 0 | 0 | 0 | 0 |
| <i>Muntiacus_fae</i>            | 0 | 0 | 0 | 0 |
| <i>Muntiacus_gongshanensis</i>  | 0 | 0 | 0 | 0 |
| <i>Muntiacus_muntjak</i>        | 0 | 0 | 0 | 0 |
| <i>Muntiacus_reevesi</i>        | 0 | 0 | 0 | 0 |
| <i>Muntiacus_rooseveltorum</i>  | 0 | 0 | 0 | 0 |
| <i>Muntiacus_vuquangensis</i>   | 0 | 0 | 0 | 0 |
| <i>Murina_aenea</i>             | 0 | 0 | 0 | 0 |
| <i>Murina_aurata</i>            | 0 | 0 | 0 | 0 |
| <i>Murina_cyclotis</i>          | 0 | 0 | 0 | 0 |
| <i>Murina_florium</i>           | 0 | 0 | 0 | 0 |
| <i>Murina_hilgendorfi</i>       | 0 | 0 | 0 | 0 |
| <i>Murina_huttoni</i>           | 0 | 0 | 0 | 0 |
| <i>Murina_leucogaster</i>       | 0 | 0 | 0 | 0 |
| <i>Murina_puta</i>              | 0 | 0 | 0 | 0 |
| <i>Murina_rozendaali</i>        | 0 | 0 | 0 | 0 |
| <i>Murina_suilla</i>            | 0 | 0 | 0 | 0 |
| <i>Murina_tubinaris</i>         | 0 | 0 | 0 | 0 |
| <i>Murina_ussuriensis</i>       | 0 | 0 | 0 | 0 |
| <i>Mus_baoulei</i>              | 0 | 0 | 0 | 0 |
| <i>Mus_booduga</i>              | 0 | 0 | 0 | 0 |
| <i>Mus_bufo</i>                 | 0 | 0 | 0 | 0 |

|                                 |   |   |   |   |
|---------------------------------|---|---|---|---|
| <i>Mus_caroli</i>               | 0 | 0 | 0 | 0 |
| <i>Mus_cervicolor</i>           | 0 | 0 | 0 | 0 |
| <i>Mus_cf_saxicola</i>          | 0 | 0 | 0 | 0 |
| <i>Mus_cookii</i>               | 0 | 0 | 0 | 0 |
| <i>Mus_crociduroides</i>        | 0 | 0 | 0 | 0 |
| <i>Mus_famulus</i>              | 0 | 0 | 0 | 0 |
| <i>Mus_haussa</i>               | 0 | 0 | 0 | 0 |
| <i>Mus_indutus</i>              | 0 | 0 | 0 | 0 |
| <i>Mus_macedonicus</i>          | 0 | 0 | 0 | 0 |
| <i>Mus_mattheyi</i>             | 0 | 0 | 0 | 0 |
| <i>Mus_minutoides</i>           | 0 | 0 | 0 | 0 |
| <i>Mus_musculoides</i>          | 0 | 0 | 0 | 0 |
| <i>Mus_musculus</i>             | 0 | 0 | 0 | 0 |
| <i>Mus_pahari</i>               | 0 | 0 | 0 | 0 |
| <i>Mus_platythrix</i>           | 0 | 0 | 0 | 0 |
| <i>Mus_saxicola</i>             | 0 | 0 | 0 | 0 |
| <i>Mus_setulosus</i>            | 0 | 0 | 0 | 0 |
| <i>Mus_shortridgei</i>          | 0 | 0 | 0 | 0 |
| <i>Mus_sorella</i>              | 0 | 0 | 0 | 0 |
| <i>Mus_spicilegus</i>           | 0 | 0 | 0 | 0 |
| <i>Mus_spretus</i>              | 0 | 0 | 0 | 0 |
| <i>Mus_tenellus</i>             | 0 | 0 | 0 | 0 |
| <i>Mus_terricolor</i>           | 0 | 0 | 0 | 0 |
| <i>Mus_triton</i>               | 0 | 0 | 0 | 0 |
| <i>Muscardinus_avellanarius</i> | 0 | 0 | 0 | 0 |
| <i>Musonycteris_harrisoni</i>   | 0 | 0 | 0 | 0 |
| <i>Mustela_africana</i>         | 0 | 0 | 0 | 0 |
| <i>Mustela_altaica</i>          | 0 | 0 | 0 | 0 |
| <i>Mustela_erminea</i>          | 0 | 0 | 0 | 0 |
| <i>Mustela_eversmannii</i>      | 0 | 0 | 0 | 0 |
| <i>Mustela_felipei</i>          | 0 | 0 | 0 | 0 |
| <i>Mustela_frenata</i>          | 0 | 0 | 0 | 0 |
| <i>Mustela_itatsi</i>           | 0 | 0 | 0 | 0 |
| <i>Mustela_kathiah</i>          | 0 | 0 | 0 | 0 |
| <i>Mustela_lutreola</i>         | 0 | 0 | 0 | 0 |
| <i>Mustela_nigripes</i>         | 0 | 0 | 0 | 0 |
| <i>Mustela_nivalis</i>          | 0 | 0 | 0 | 0 |
| <i>Mustela_nudipes</i>          | 0 | 0 | 0 | 0 |
| <i>Mustela_putorius</i>         | 0 | 0 | 0 | 0 |
| <i>Mustela_sibirica</i>         | 0 | 0 | 0 | 0 |
| <i>Mustela_strigidorsa</i>      | 0 | 0 | 0 | 0 |
| <i>Mydaus_javanensis</i>        | 0 | 0 | 0 | 0 |
| <i>Mydaus_marchei</i>           | 0 | 0 | 0 | 0 |
| <i>Mylomys_dybowskii</i>        | 0 | 0 | 0 | 0 |

|                                  |   |   |   |   |
|----------------------------------|---|---|---|---|
| <i>Myocastor_coypus</i>          | 0 | 0 | 0 | 0 |
| <i>Myodes_andersoni</i>          | 0 | 0 | 0 | 0 |
| <i>Myodes_californicus</i>       | 0 | 0 | 0 | 0 |
| <i>Myodes_centralis</i>          | 0 | 0 | 0 | 0 |
| <i>Myodes_gapperi</i>            | 0 | 0 | 0 | 0 |
| <i>Myodes_glareolus</i>          | 0 | 0 | 0 | 0 |
| <i>Myodes_regulus</i>            | 0 | 0 | 0 | 0 |
| <i>Myodes_rex</i>                | 0 | 0 | 0 | 0 |
| <i>Myodes_rufocanus</i>          | 0 | 0 | 0 | 0 |
| <i>Myodes_rutilus</i>            | 0 | 0 | 0 | 0 |
| <i>Myomimus_roachi</i>           | 0 | 0 | 0 | 0 |
| <i>Myomyscus_brockmani</i>       | 0 | 0 | 0 | 0 |
| <i>Myomyscus_verreauxii</i>      | 0 | 0 | 0 | 0 |
| <i>Myomyscus_yemeni</i>          | 0 | 0 | 0 | 0 |
| <i>Myonycteris_angolensis</i>    | 0 | 0 | 0 | 0 |
| <i>Myonycteris_brachycephala</i> | 0 | 0 | 0 | 0 |
| <i>Myonycteris_relicta</i>       | 0 | 0 | 0 | 0 |
| <i>Myonycteris_torquata</i>      | 0 | 0 | 0 | 0 |
| <i>Myoprocta_acouchy</i>         | 0 | 0 | 0 | 0 |
| <i>Myoprocta_pratti</i>          | 0 | 0 | 0 | 0 |
| <i>Myopus_schisticolor</i>       | 0 | 0 | 0 | 0 |
| <i>Myosciurus_pumilio</i>        | 0 | 0 | 0 | 0 |
| <i>Myosorex_blarina</i>          | 0 | 0 | 0 | 0 |
| <i>Myosorex_cafer</i>            | 0 | 0 | 0 | 0 |
| <i>Myosorex_geata</i>            | 0 | 0 | 0 | 0 |
| <i>Myosorex_longicaudatus</i>    | 0 | 0 | 0 | 0 |
| <i>Myosorex_sclateri</i>         | 0 | 0 | 0 | 0 |
| <i>Myosorex_varius</i>           | 0 | 0 | 0 | 0 |
| <i>Myospalax_aspalax</i>         | 0 | 0 | 0 | 0 |
| <i>Myospalax_psilurus</i>        | 0 | 0 | 0 | 0 |
| <i>Myotis_adversus</i>           | 0 | 0 | 0 | 0 |
| <i>Myotis_albescens</i>          | 0 | 0 | 0 | 0 |
| <i>Myotis_alcathoe</i>           | 0 | 0 | 0 | 0 |
| <i>Myotis_altarium</i>           | 0 | 0 | 0 | 0 |
| <i>Myotis_anjouanensis</i>       | 0 | 0 | 0 | 0 |
| <i>Myotis_annectans</i>          | 0 | 0 | 0 | 0 |
| <i>Myotis_atacamensis</i>        | 0 | 0 | 0 | 0 |
| <i>Myotis_ater</i>               | 0 | 0 | 0 | 0 |
| <i>Myotis_auriculus</i>          | 0 | 0 | 0 | 0 |
| <i>Myotis_austroriparius</i>     | 0 | 0 | 0 | 0 |
| <i>Myotis_bechsteinii</i>        | 0 | 0 | 0 | 0 |
| <i>Myotis_blythii</i>            | 0 | 0 | 0 | 0 |
| <i>Myotis_bocagii</i>            | 0 | 0 | 0 | 0 |
| <i>Myotis_bombinus</i>           | 0 | 0 | 0 | 0 |

|                              |   |   |   |   |
|------------------------------|---|---|---|---|
| <i>Myotis_brandtii</i>       | 0 | 0 | 0 | 0 |
| <i>Myotis_californicus</i>   | 0 | 0 | 0 | 0 |
| <i>Myotis_capaccinii</i>     | 0 | 0 | 0 | 0 |
| <i>Myotis_cf._browni</i>     | 0 | 0 | 0 | 0 |
| <i>Myotis_cf._muricola</i>   | 0 | 0 | 0 | 0 |
| <i>Myotis_chiloensis</i>     | 0 | 0 | 0 | 0 |
| <i>Myotis_chinensis</i>      | 0 | 0 | 0 | 0 |
| <i>Myotis_ciliolabrum</i>    | 0 | 0 | 0 | 0 |
| <i>Myotis_dasycneme</i>      | 0 | 0 | 0 | 0 |
| <i>Myotis_daubentonii</i>    | 0 | 0 | 0 | 0 |
| <i>Myotis_davidii</i>        | 0 | 0 | 0 | 0 |
| <i>Myotis_dominicensis</i>   | 0 | 0 | 0 | 0 |
| <i>Myotis_elegans</i>        | 0 | 0 | 0 | 0 |
| <i>Myotis_emarginatus</i>    | 0 | 0 | 0 | 0 |
| <i>Myotis_evotis</i>         | 0 | 0 | 0 | 0 |
| <i>Myotis_fimbriatus</i>     | 0 | 0 | 0 | 0 |
| <i>Myotis_formosus</i>       | 0 | 0 | 0 | 0 |
| <i>Myotis_fortidens</i>      | 0 | 0 | 0 | 0 |
| <i>Myotis_frater</i>         | 0 | 0 | 0 | 0 |
| <i>Myotis_goudoti</i>        | 0 | 0 | 0 | 0 |
| <i>Myotis_gracilis</i>       | 0 | 0 | 0 | 0 |
| <i>Myotis_grisescens</i>     | 0 | 0 | 0 | 0 |
| <i>Myotis_hajastanicus</i>   | 0 | 0 | 0 | 0 |
| <i>Myotis_hasseltii</i>      | 0 | 0 | 0 | 0 |
| <i>Myotis_horsfieldii</i>    | 0 | 0 | 0 | 0 |
| <i>Myotis_ikonnikovi</i>     | 0 | 0 | 0 | 0 |
| <i>Myotis_keaysi</i>         | 0 | 0 | 0 | 0 |
| <i>Myotis_keenii</i>         | 0 | 0 | 0 | 0 |
| <i>Myotis_laniger</i>        | 0 | 0 | 0 | 0 |
| <i>Myotis_latirostris</i>    | 0 | 0 | 0 | 0 |
| <i>Myotis_leibii</i>         | 0 | 0 | 0 | 0 |
| <i>Myotis_levis</i>          | 0 | 0 | 0 | 0 |
| <i>Myotis_longipes</i>       | 0 | 0 | 0 | 0 |
| <i>Myotis_lucifugus</i>      | 0 | 0 | 0 | 0 |
| <i>Myotis_macroductylus</i>  | 0 | 0 | 0 | 0 |
| <i>Myotis_macropus</i>       | 0 | 0 | 0 | 0 |
| <i>Myotis_macrotarsus</i>    | 0 | 0 | 0 | 0 |
| <i>Myotis_martiniquensis</i> | 0 | 0 | 0 | 0 |
| <i>Myotis_moluccarum</i>     | 0 | 0 | 0 | 0 |
| <i>Myotis_montivagus</i>     | 0 | 0 | 0 | 0 |
| <i>Myotis_muricola</i>       | 0 | 0 | 0 | 0 |
| <i>Myotis_myotis</i>         | 0 | 0 | 0 | 0 |
| <i>Myotis_mystacinus</i>     | 0 | 0 | 0 | 0 |
| <i>Myotis_nattereri</i>      | 0 | 0 | 0 | 0 |

|                                |   |   |   |   |
|--------------------------------|---|---|---|---|
| <i>Myotis_nigricans</i>        | 0 | 0 | 0 | 0 |
| <i>Myotis_nipalensis</i>       | 0 | 0 | 0 | 0 |
| <i>Myotis_oxynathus</i>        | 0 | 0 | 0 | 0 |
| <i>Myotis_oxotus</i>           | 0 | 0 | 0 | 0 |
| <i>Myotis_pequinius</i>        | 0 | 0 | 0 | 0 |
| <i>Myotis_pruinosus</i>        | 0 | 0 | 0 | 0 |
| <i>Myotis_punicus</i>          | 0 | 0 | 0 | 0 |
| <i>Myotis_ricketti</i>         | 0 | 0 | 0 | 0 |
| <i>Myotis_ridleyi</i>          | 0 | 0 | 0 | 0 |
| <i>Myotis_riparius</i>         | 0 | 0 | 0 | 0 |
| <i>Myotis_rosseti</i>          | 0 | 0 | 0 | 0 |
| <i>Myotis_ruber</i>            | 0 | 0 | 0 | 0 |
| <i>Myotis_schaubi</i>          | 0 | 0 | 0 | 0 |
| <i>Myotis_scotti</i>           | 0 | 0 | 0 | 0 |
| <i>Myotis_septentrionalis</i>  | 0 | 0 | 0 | 0 |
| <i>Myotis_sicarius</i>         | 0 | 0 | 0 | 0 |
| <i>Myotis_siligorensis</i>     | 0 | 0 | 0 | 0 |
| <i>Myotis_simus</i>            | 0 | 0 | 0 | 0 |
| <i>Myotis_sodalis</i>          | 0 | 0 | 0 | 0 |
| <i>Myotis_sp._RJL-2012</i>     | 0 | 0 | 0 | 0 |
| <i>Myotis_thysanodes</i>       | 0 | 0 | 0 | 0 |
| <i>Myotis_tricolor</i>         | 0 | 0 | 0 | 0 |
| <i>Myotis_velifer</i>          | 0 | 0 | 0 | 0 |
| <i>Myotis_vivesi</i>           | 0 | 0 | 0 | 0 |
| <i>Myotis_volans</i>           | 0 | 0 | 0 | 0 |
| <i>Myotis_welwitschii</i>      | 0 | 0 | 0 | 0 |
| <i>Myotis_yumanensis</i>       | 0 | 0 | 0 | 0 |
| <i>Myotomys_sloggetti</i>      | 0 | 0 | 0 | 0 |
| <i>Myotomys_unisulcatus</i>    | 0 | 0 | 0 | 0 |
| <i>Myotragus_balearicus</i>    | 0 | 0 | 0 | 0 |
| <i>Myrmecophaga_tridactyla</i> | 0 | 0 | 0 | 0 |
| <i>Mystacina_tuberculata</i>   | 0 | 0 | 0 | 0 |
| <i>Mystromys_albicaudatus</i>  | 0 | 0 | 0 | 0 |
| <i>Myzopoda_aurita</i>         | 0 | 0 | 0 | 0 |
| <i>Myzopoda_schliemanni</i>    | 0 | 0 | 0 | 0 |
| <i>Naemorhedus_baileyi</i>     | 0 | 0 | 0 | 0 |
| <i>Naemorhedus_caudatus</i>    | 0 | 0 | 0 | 0 |
| <i>Naemorhedus_goral</i>       | 0 | 0 | 0 | 0 |
| <i>Naemorhedus_griseus</i>     | 0 | 0 | 0 | 0 |
| <i>Nandinia_binotata</i>       | 0 | 0 | 0 | 0 |
| <i>Nanger_dama</i>             | 0 | 0 | 0 | 0 |
| <i>Nanger_granti</i>           | 0 | 0 | 0 | 0 |
| <i>Nanger_soemmerringii</i>    | 0 | 0 | 0 | 0 |
| <i>Nannosciurus_melanotis</i>  | 0 | 0 | 0 | 0 |



|                                 |   |   |   |   |
|---------------------------------|---|---|---|---|
| <i>Nannospalax_ehrenbergi</i>   | 0 | 0 | 0 | 0 |
| <i>Nannospalax_leucodon</i>     | 0 | 0 | 0 | 0 |
| <i>Nannospalax_nehringi</i>     | 0 | 0 | 0 | 0 |
| <i>Nanonycteris_veldkampii</i>  | 0 | 0 | 0 | 0 |
| <i>Napaeozapus_insignis</i>     | 0 | 0 | 0 | 0 |
| <i>Nasalis_larvatus</i>         | 0 | 0 | 0 | 0 |
| <i>Nasua_narica</i>             | 0 | 0 | 0 | 0 |
| <i>Nasua_nasua</i>              | 0 | 0 | 0 | 0 |
| <i>Nasuella_olivacea</i>        | 0 | 0 | 0 | 0 |
| <i>Natalus_jamaicensis</i>      | 0 | 0 | 0 | 0 |
| <i>Natalus_major</i>            | 0 | 0 | 0 | 0 |
| <i>Natalus_stramineus</i>       | 0 | 0 | 0 | 0 |
| <i>Natalus_tumidirostris</i>    | 0 | 0 | 0 | 0 |
| <i>Neacomys_guianae</i>         | 0 | 0 | 0 | 0 |
| <i>Neacomys_minutus</i>         | 0 | 0 | 0 | 0 |
| <i>Neacomys_musseri</i>         | 0 | 0 | 0 | 0 |
| <i>Neacomys_spinosus</i>        | 0 | 0 | 0 | 0 |
| <i>Neamblysomus_gunningi</i>    | 0 | 0 | 0 | 0 |
| <i>Neamblysomus_julianae</i>    | 0 | 0 | 0 | 0 |
| <i>Necromys_lactens</i>         | 0 | 0 | 0 | 0 |
| <i>Necromys_lenguarum</i>       | 0 | 0 | 0 | 0 |
| <i>Necromys_obscurus</i>        | 0 | 0 | 0 | 0 |
| <i>Nectogale_elegans</i>        | 0 | 0 | 0 | 0 |
| <i>Nectomys_apicalis</i>        | 0 | 0 | 0 | 0 |
| <i>Nectomys_squamipes</i>       | 0 | 0 | 0 | 0 |
| <i>Nelsonia_neotomodon</i>      | 0 | 0 | 0 | 0 |
| <i>Neodon_irene</i>             | 0 | 0 | 0 | 0 |
| <i>Neodon_juldaschi</i>         | 0 | 0 | 0 | 0 |
| <i>Neodon_sikimensis</i>        | 0 | 0 | 0 | 0 |
| <i>Neofelis_nebulosa</i>        | 0 | 0 | 0 | 0 |
| <i>Neofiber_alleni</i>          | 0 | 0 | 0 | 0 |
| <i>Neohylomys_hainanensis</i>   | 0 | 0 | 0 | 0 |
| <i>Neomys_anomalus</i>          | 0 | 0 | 0 | 0 |
| <i>Neomys_fodiens</i>           | 0 | 0 | 0 | 0 |
| <i>Neomys_teres</i>             | 0 | 0 | 0 | 0 |
| <i>Neophoca_cinerea</i>         | 0 | 0 | 0 | 0 |
| <i>Neophocaena_phocaenoides</i> | 0 | 0 | 0 | 0 |
| <i>Neoromicia_brunneus</i>      | 0 | 0 | 0 | 0 |
| <i>Neoromicia_capensis</i>      | 0 | 0 | 0 | 0 |
| <i>Neoromicia_nanus</i>         | 0 | 0 | 0 | 0 |
| <i>Neoromicia_rendalli</i>      | 0 | 0 | 0 | 0 |
| <i>Neoromicia_somalicus</i>     | 0 | 0 | 0 | 0 |
| <i>Neotetracus_sinensis</i>     | 0 | 0 | 0 | 0 |
| <i>Neotoma_albigula</i>         | 0 | 0 | 0 | 0 |

|                                 |   |   |   |   |
|---------------------------------|---|---|---|---|
| <i>Neotoma_angustapalata</i>    | 0 | 0 | 0 | 0 |
| <i>Neotoma_bryanti</i>          | 0 | 0 | 0 | 0 |
| <i>Neotoma_cinerea</i>          | 0 | 0 | 0 | 0 |
| <i>Neotoma_devia</i>            | 0 | 0 | 0 | 0 |
| <i>Neotoma_floridana</i>        | 0 | 0 | 0 | 0 |
| <i>Neotoma_fuscipes</i>         | 0 | 0 | 0 | 0 |
| <i>Neotoma_goldmani</i>         | 0 | 0 | 0 | 0 |
| <i>Neotoma_lepida</i>           | 0 | 0 | 0 | 0 |
| <i>Neotoma_leucodon</i>         | 0 | 0 | 0 | 0 |
| <i>Neotoma_macrotis</i>         | 0 | 0 | 0 | 0 |
| <i>Neotoma_magister</i>         | 0 | 0 | 0 | 0 |
| <i>Neotoma_mexicana</i>         | 0 | 0 | 0 | 0 |
| <i>Neotoma_micropus</i>         | 0 | 0 | 0 | 0 |
| <i>Neotoma_stephensi</i>        | 0 | 0 | 0 | 0 |
| <i>Neotomodon_alstoni</i>       | 0 | 0 | 0 | 0 |
| <i>Neotragus_batesi</i>         | 0 | 0 | 0 | 0 |
| <i>Neotragus_moschatus</i>      | 0 | 0 | 0 | 0 |
| <i>Neovison_vison</i>           | 0 | 0 | 0 | 0 |
| <i>Nephelomys_albigularis</i>   | 0 | 0 | 0 | 0 |
| <i>Nesokia_indica</i>           | 0 | 0 | 0 | 0 |
| <i>Nesolagus_netscheri</i>      | 0 | 0 | 0 | 0 |
| <i>Nesolagus_timinsi</i>        | 0 | 0 | 0 | 0 |
| <i>Nesomys_audeberti</i>        | 0 | 0 | 0 | 0 |
| <i>Nesomys_rufus</i>            | 0 | 0 | 0 | 0 |
| <i>Nesoryzomys_fernandinae</i>  | 0 | 0 | 0 | 0 |
| <i>Nesoryzomys_narboroughi</i>  | 0 | 0 | 0 | 0 |
| <i>Nesoryzomys_swarthi</i>      | 0 | 0 | 0 | 0 |
| <i>Neurotrichus_gibbsii</i>     | 0 | 0 | 0 | 0 |
| <i>Neusticomys_monticolus</i>   | 0 | 0 | 0 | 0 |
| <i>Niviventer_andersoni</i>     | 0 | 0 | 0 | 0 |
| <i>Niviventer_confucianus</i>   | 0 | 0 | 0 | 0 |
| <i>Niviventer_coninga</i>       | 0 | 0 | 0 | 0 |
| <i>Niviventer_cremoriventer</i> | 0 | 0 | 0 | 0 |
| <i>Niviventer_culturatus</i>    | 0 | 0 | 0 | 0 |
| <i>Niviventer_aha</i>           | 0 | 0 | 0 | 0 |
| <i>Niviventer_excelsior</i>     | 0 | 0 | 0 | 0 |
| <i>Niviventer_fulvescens</i>    | 0 | 0 | 0 | 0 |
| <i>Niviventer_langbianis</i>    | 0 | 0 | 0 | 0 |
| <i>Niviventer_niviventer</i>    | 0 | 0 | 0 | 0 |
| <i>Niviventer_rapit</i>         | 0 | 0 | 0 | 0 |
| <i>Niviventer_tenaster</i>      | 0 | 0 | 0 | 0 |
| <i>Noctilio_albiventris</i>     | 0 | 0 | 0 | 0 |
| <i>Noctilio_leporinus</i>       | 0 | 0 | 0 | 0 |
| <i>Nomascus_concolor</i>        | 0 | 0 | 0 | 0 |

|                                 |   |   |   |   |
|---------------------------------|---|---|---|---|
| <i>Nomascus_gabriellae</i>      | 0 | 0 | 0 | 0 |
| <i>Nomascus_hainanus</i>        | 0 | 0 | 0 | 0 |
| <i>Nomascus_leucogenys</i>      | 0 | 0 | 0 | 0 |
| <i>Nomascus_nasutus</i>         | 0 | 0 | 0 | 0 |
| <i>Nomascus_siki</i>            | 0 | 0 | 0 | 0 |
| <i>Notiomys_edwardsii</i>       | 0 | 0 | 0 | 0 |
| <i>Notiosorex_crawfordi</i>     | 0 | 0 | 0 | 0 |
| <i>Notocitellus_adocetus</i>    | 0 | 0 | 0 | 0 |
| <i>Notocitellus_annulatus</i>   | 0 | 0 | 0 | 0 |
| <i>Notomys_alexis</i>           | 0 | 0 | 0 | 0 |
| <i>Notomys_aquilo</i>           | 0 | 0 | 0 | 0 |
| <i>Notomys_cervinus</i>         | 0 | 0 | 0 | 0 |
| <i>Notomys_fuscus</i>           | 0 | 0 | 0 | 0 |
| <i>Notomys_mitchellii</i>       | 0 | 0 | 0 | 0 |
| <i>Notopteris_macdonaldi</i>    | 0 | 0 | 0 | 0 |
| <i>Nyctalus_aviator</i>         | 0 | 0 | 0 | 0 |
| <i>Nyctalus_azoreum</i>         | 0 | 0 | 0 | 0 |
| <i>Nyctalus_lasiopterus</i>     | 0 | 0 | 0 | 0 |
| <i>Nyctalus_leisleri</i>        | 0 | 0 | 0 | 0 |
| <i>Nyctalus_noctula</i>         | 0 | 0 | 0 | 0 |
| <i>Nyctalus_plancyi</i>         | 0 | 0 | 0 | 0 |
| <i>Nyctereutes_procyonoides</i> | 0 | 0 | 0 | 0 |
| <i>Nycteris_arage</i>           | 0 | 0 | 0 | 0 |
| <i>Nycteris_grandis</i>         | 0 | 0 | 0 | 0 |
| <i>Nycteris_hispida</i>         | 0 | 0 | 0 | 0 |
| <i>Nycteris_javanica</i>        | 0 | 0 | 0 | 0 |
| <i>Nycteris_macrotis</i>        | 0 | 0 | 0 | 0 |
| <i>Nycteris_thebaica</i>        | 0 | 0 | 0 | 0 |
| <i>Nycteris_tragata</i>         | 0 | 0 | 0 | 0 |
| <i>Nycticebus_bengalensis</i>   | 0 | 0 | 0 | 0 |
| <i>Nycticebus_coucang</i>       | 0 | 0 | 0 | 0 |
| <i>Nycticebus_pygmaeus</i>      | 0 | 0 | 0 | 0 |
| <i>Nycticeinops_schlieffeni</i> | 0 | 0 | 0 | 0 |
| <i>Nycticeius_humeralis</i>     | 0 | 0 | 0 | 0 |
| <i>Nyctiellus_lepidus</i>       | 0 | 0 | 0 | 0 |
| <i>Nyctimene_aello</i>          | 0 | 0 | 0 | 0 |
| <i>Nyctimene_albiventer</i>     | 0 | 0 | 0 | 0 |
| <i>Nyctimene_cephalotes</i>     | 0 | 0 | 0 | 0 |
| <i>Nyctimene_certans</i>        | 0 | 0 | 0 | 0 |
| <i>Nyctimene_major</i>          | 0 | 0 | 0 | 0 |
| <i>Nyctimene_robinsoni</i>      | 0 | 0 | 0 | 0 |
| <i>Nyctimene_vizcaccia</i>      | 0 | 0 | 0 | 0 |
| <i>Nyctinomops_femorosaccus</i> | 0 | 0 | 0 | 0 |
| <i>Nyctomys_sumichrasti</i>     | 0 | 0 | 0 | 0 |

|                                |   |   |   |   |
|--------------------------------|---|---|---|---|
| <i>Nyctophilus_arnhemensis</i> | 0 | 0 | 0 | 0 |
| <i>Nyctophilus_geoffroyi</i>   | 0 | 0 | 0 | 0 |
| <i>Nyctophilus_gouldi</i>      | 0 | 0 | 0 | 0 |
| <i>Ochotona_alpina</i>         | 0 | 0 | 0 | 0 |
| <i>Ochotona_annectens</i>      | 0 | 0 | 0 | 0 |
| <i>Ochotona_cansus</i>         | 0 | 0 | 0 | 0 |
| <i>Ochotona_collaris</i>       | 0 | 0 | 0 | 0 |
| <i>Ochotona_curzoniae</i>      | 0 | 0 | 0 | 0 |
| <i>Ochotona_daurica</i>        | 0 | 0 | 0 | 0 |
| <i>Ochotona_erythrotis</i>     | 0 | 0 | 0 | 0 |
| <i>Ochotona_forresti</i>       | 0 | 0 | 0 | 0 |
| <i>Ochotona_gloveri</i>        | 0 | 0 | 0 | 0 |
| <i>Ochotona_himalayana</i>     | 0 | 0 | 0 | 0 |
| <i>Ochotona_hoffmanni</i>      | 0 | 0 | 0 | 0 |
| <i>Ochotona_huangensis</i>     | 0 | 0 | 0 | 0 |
| <i>Ochotona_hyperborea</i>     | 0 | 0 | 0 | 0 |
| <i>Ochotona_iliensis</i>       | 0 | 0 | 0 | 0 |
| <i>Ochotona_koslowi</i>        | 0 | 0 | 0 | 0 |
| <i>Ochotona_ladacensis</i>     | 0 | 0 | 0 | 0 |
| <i>Ochotona_macrotis</i>       | 0 | 0 | 0 | 0 |
| <i>Ochotona_muliensis</i>      | 0 | 0 | 0 | 0 |
| <i>Ochotona_nubrica</i>        | 0 | 0 | 0 | 0 |
| <i>Ochotona_pallasi</i>        | 0 | 0 | 0 | 0 |
| <i>Ochotona_princeps</i>       | 0 | 0 | 0 | 0 |
| <i>Ochotona_pusilla</i>        | 0 | 0 | 0 | 0 |
| <i>Ochotona_roylei</i>         | 0 | 0 | 0 | 0 |
| <i>Ochotona_rufescens</i>      | 0 | 0 | 0 | 0 |
| <i>Ochotona_rutila</i>         | 0 | 0 | 0 | 0 |
| <i>Ochotona_thibetana</i>      | 0 | 0 | 0 | 0 |
| <i>Ochotona_thomasi</i>        | 0 | 0 | 0 | 0 |
| <i>Ochotona_turuchanensis</i>  | 0 | 0 | 0 | 0 |
| <i>Ochrotomys_nuttalli</i>     | 0 | 0 | 0 | 0 |
| <i>Octodon_bridgesi</i>        | 0 | 0 | 0 | 0 |
| <i>Octodon_degus</i>           | 0 | 0 | 0 | 0 |
| <i>Octodon_lunatus</i>         | 0 | 0 | 0 | 0 |
| <i>Octodontomys_gliroides</i>  | 0 | 0 | 0 | 0 |
| <i>Octomys_mimax</i>           | 0 | 0 | 0 | 0 |
| <i>Odobenus_rosmarus</i>       | 0 | 0 | 0 | 0 |
| <i>Odocoileus_hemionus</i>     | 0 | 0 | 0 | 0 |
| <i>Odocoileus_virginianus</i>  | 0 | 0 | 0 | 0 |
| <i>Oecomys_auyantepui</i>      | 0 | 0 | 0 | 0 |
| <i>Oecomys_bicolor</i>         | 0 | 0 | 0 | 0 |
| <i>Oecomys_catherinae</i>      | 0 | 0 | 0 | 0 |
| <i>Oecomys_concolor</i>        | 0 | 0 | 0 | 0 |

|                                   |   |   |   |   |
|-----------------------------------|---|---|---|---|
| <i>Oecomys_mamorae</i>            | 0 | 0 | 0 | 0 |
| <i>Oecomys_paricola</i>           | 0 | 0 | 0 | 0 |
| <i>Oecomys_rex</i>                | 0 | 0 | 0 | 0 |
| <i>Oecomys_roberti</i>            | 0 | 0 | 0 | 0 |
| <i>Oecomys_rutilus</i>            | 0 | 0 | 0 | 0 |
| <i>Oecomys_superans</i>           | 0 | 0 | 0 | 0 |
| <i>Oecomys_trinitatis</i>         | 0 | 0 | 0 | 0 |
| <i>Oenomys_hypoxanthus</i>        | 0 | 0 | 0 | 0 |
| <i>Okapia_johnstoni</i>           | 0 | 0 | 0 | 0 |
| <i>Oligoryzomys_andinus</i>       | 0 | 0 | 0 | 0 |
| <i>Oligoryzomys_chacoensis</i>    | 0 | 0 | 0 | 0 |
| <i>Oligoryzomys_delticola</i>     | 0 | 0 | 0 | 0 |
| <i>Oligoryzomys_destructor</i>    | 0 | 0 | 0 | 0 |
| <i>Oligoryzomys_eliurus</i>       | 0 | 0 | 0 | 0 |
| <i>Oligoryzomys_flavescens</i>    | 0 | 0 | 0 | 0 |
| <i>Oligoryzomys_fornesi</i>       | 0 | 0 | 0 | 0 |
| <i>Oligoryzomys_fulvescens</i>    | 0 | 0 | 0 | 0 |
| <i>Oligoryzomys_longicaudatus</i> | 0 | 0 | 0 | 0 |
| <i>Oligoryzomys_magellanicus</i>  | 0 | 0 | 0 | 0 |
| <i>Oligoryzomys_messorius</i>     | 0 | 0 | 0 | 0 |
| <i>Oligoryzomys_microtis</i>      | 0 | 0 | 0 | 0 |
| <i>Oligoryzomys_moojeni</i>       | 0 | 0 | 0 | 0 |
| <i>Oligoryzomys_nigripes</i>      | 0 | 0 | 0 | 0 |
| <i>Oligoryzomys_sp._1_MIC210</i>  | 0 | 0 | 0 | 0 |
| <i>Oligoryzomys_stramineus</i>    | 0 | 0 | 0 | 0 |
| <i>Oligoryzomys_vegetus</i>       | 0 | 0 | 0 | 0 |
| <i>Ommatophoca_rossii</i>         | 0 | 0 | 0 | 0 |
| <i>Ondatra_zibethicus</i>         | 0 | 0 | 0 | 0 |
| <i>Onychomys_arenicola</i>        | 0 | 0 | 0 | 0 |
| <i>Onychomys_leucogaster</i>      | 0 | 0 | 0 | 0 |
| <i>Onychomys_torridus</i>         | 0 | 0 | 0 | 0 |
| <i>Orcaella_brevirostris</i>      | 0 | 0 | 0 | 0 |
| <i>Orcaella_heinsohni</i>         | 0 | 0 | 0 | 0 |
| <i>Orcinus_orca</i>               | 0 | 0 | 0 | 0 |
| <i>Oreamnos_americanus</i>        | 0 | 0 | 0 | 0 |
| <i>Oreoryzomys_balneator</i>      | 0 | 0 | 0 | 0 |
| <i>Oreotragus_oreotragus</i>      | 0 | 0 | 0 | 0 |
| <i>Orthogeomys_cavator</i>        | 0 | 0 | 0 | 0 |
| <i>Orthogeomys_cherriei</i>       | 0 | 0 | 0 | 0 |
| <i>Orthogeomys_grandis</i>        | 0 | 0 | 0 | 0 |
| <i>Orthogeomys_heterodus</i>      | 0 | 0 | 0 | 0 |
| <i>Orthogeomys_hispidus</i>       | 0 | 0 | 0 | 0 |
| <i>Orthogeomys_underwoodi</i>     | 0 | 0 | 0 | 0 |
| <i>Orycteropus_afer</i>           | 0 | 0 | 0 | 0 |

|                                     |   |   |   |   |
|-------------------------------------|---|---|---|---|
| <i>Oryctolagus_cuniculus</i>        | 0 | 0 | 0 | 0 |
| <i>Oryx_beisa</i>                   | 0 | 0 | 0 | 0 |
| <i>Oryx_dammah</i>                  | 0 | 0 | 0 | 0 |
| <i>Oryx_gazella</i>                 | 0 | 0 | 0 | 0 |
| <i>Oryx_leucoryx</i>                | 0 | 0 | 0 | 0 |
| <i>Oryzomys_couesi</i>              | 0 | 0 | 0 | 0 |
| <i>Oryzomys_mexicanus</i>           | 0 | 0 | 0 | 0 |
| <i>Oryzomys_palustris</i>           | 0 | 0 | 0 | 0 |
| <i>Oryzorictes_hova</i>             | 0 | 0 | 0 | 0 |
| <i>Osgoodomys_banderanus</i>        | 0 | 0 | 0 | 0 |
| <i>Otaria_byronia</i>               | 0 | 0 | 0 | 0 |
| <i>Otocolobus_manul</i>             | 0 | 0 | 0 | 0 |
| <i>Otocyon_megalotis</i>            | 0 | 0 | 0 | 0 |
| <i>Otolemur_crassicaudatus</i>      | 0 | 0 | 0 | 0 |
| <i>Otolemur_garnettii</i>           | 0 | 0 | 0 | 0 |
| <i>Otolemur_monteiri</i>            | 0 | 0 | 0 | 0 |
| <i>Otomops_cf._formosus</i>         | 0 | 0 | 0 | 0 |
| <i>Otomops_madagascariensis</i>     | 0 | 0 | 0 | 0 |
| <i>Otomops_martiensseni</i>         | 0 | 0 | 0 | 0 |
| <i>Otomops_wroughtoni</i>           | 0 | 0 | 0 | 0 |
| <i>Otomys_anchietae</i>             | 0 | 0 | 0 | 0 |
| <i>Otomys_angoniensis</i>           | 0 | 0 | 0 | 0 |
| <i>Otomys_barbouri</i>              | 0 | 0 | 0 | 0 |
| <i>Otomys_burtoni</i>               | 0 | 0 | 0 | 0 |
| <i>Otomys_dartmouthi</i>            | 0 | 0 | 0 | 0 |
| <i>Otomys_denti</i>                 | 0 | 0 | 0 | 0 |
| <i>Otomys_irroratus</i>             | 0 | 0 | 0 | 0 |
| <i>Otomys_jacksoni</i>              | 0 | 0 | 0 | 0 |
| <i>Otomys_lacustris</i>             | 0 | 0 | 0 | 0 |
| <i>Otomys_laminatus</i>             | 0 | 0 | 0 | 0 |
| <i>Otomys_maximus</i>               | 0 | 0 | 0 | 0 |
| <i>Otomys_occidentalis</i>          | 0 | 0 | 0 | 0 |
| <i>Otomys_orestes</i>               | 0 | 0 | 0 | 0 |
| <i>Otomys_saundersiae</i>           | 0 | 0 | 0 | 0 |
| <i>Otomys_tropicalis</i>            | 0 | 0 | 0 | 0 |
| <i>Otomys_typus</i>                 | 0 | 0 | 0 | 0 |
| <i>Otonycteris_hemprichii</i>       | 0 | 0 | 0 | 0 |
| <i>Otonyctomys_hatti</i>            | 0 | 0 | 0 | 0 |
| <i>Otopteropus_cartilagonodus</i>   | 0 | 0 | 0 | 0 |
| <i>Otospermophilus_atricapillus</i> | 0 | 0 | 0 | 0 |
| <i>Otospermophilus_beecheyi</i>     | 0 | 0 | 0 | 0 |
| <i>Otospermophilus_variegatus</i>   | 0 | 0 | 0 | 0 |
| <i>Ototylomys_phyllotis</i>         | 0 | 0 | 0 | 0 |
| <i>Ourebia_ourebi</i>               | 0 | 0 | 0 | 0 |

|                                   |   |   |   |   |
|-----------------------------------|---|---|---|---|
| <i>Ovibos moschatus</i>           | 0 | 0 | 0 | 0 |
| <i>Ovis ammon</i>                 | 0 | 0 | 0 | 0 |
| <i>Ovis aries</i>                 | 0 | 0 | 0 | 0 |
| <i>Ovis canadensis</i>            | 0 | 0 | 0 | 0 |
| <i>Ovis dalli</i>                 | 0 | 0 | 0 | 0 |
| <i>Ovis nivicola</i>              | 0 | 0 | 0 | 0 |
| <i>Ovis orientalis</i>            | 0 | 0 | 0 | 0 |
| <i>Ovis vignei</i>                | 0 | 0 | 0 | 0 |
| <i>Oxymycterus dasytrichus</i>    | 0 | 0 | 0 | 0 |
| <i>Oxymycterus delator</i>        | 0 | 0 | 0 | 0 |
| <i>Oxymycterus hiska</i>          | 0 | 0 | 0 | 0 |
| <i>Oxymycterus nasutus</i>        | 0 | 0 | 0 | 0 |
| <i>Oxymycterus paramensis</i>     | 0 | 0 | 0 | 0 |
| <i>Oxymycterus quaestor</i>       | 0 | 0 | 0 | 0 |
| <i>Oxymycterus rufus</i>          | 0 | 0 | 0 | 0 |
| <i>Ozotoceros bezoarticus</i>     | 0 | 0 | 0 | 0 |
| <i>Pachyuromys duprasi</i>        | 0 | 0 | 0 | 0 |
| <i>Paguma larvata</i>             | 0 | 0 | 0 | 0 |
| <i>Pan paniscus</i>               | 0 | 0 | 0 | 0 |
| <i>Pan troglodytes</i>            | 0 | 0 | 0 | 0 |
| <i>Panthera leo</i>               | 0 | 0 | 0 | 0 |
| <i>Panthera onca</i>              | 0 | 0 | 0 | 0 |
| <i>Panthera pardus</i>            | 0 | 0 | 0 | 0 |
| <i>Panthera tigris</i>            | 0 | 0 | 0 | 0 |
| <i>Pantholops hodgsonii</i>       | 0 | 0 | 0 | 0 |
| <i>Papio anubis</i>               | 0 | 0 | 0 | 0 |
| <i>Papio cynocephalus</i>         | 0 | 0 | 0 | 0 |
| <i>Papio hamadryas</i>            | 0 | 0 | 0 | 0 |
| <i>Papio papio</i>                | 0 | 0 | 0 | 0 |
| <i>Papio ursinus</i>              | 0 | 0 | 0 | 0 |
| <i>Pappogeomys alcorni</i>        | 0 | 0 | 0 | 0 |
| <i>Pappogeomys bulleri</i>        | 0 | 0 | 0 | 0 |
| <i>Paracrociodura maxima</i>      | 0 | 0 | 0 | 0 |
| <i>Paracrociodura schoutedeni</i> | 0 | 0 | 0 | 0 |
| <i>Paracynictis selousi</i>       | 0 | 0 | 0 | 0 |
| <i>Paradoxurus hermaphroditus</i> | 0 | 0 | 0 | 0 |
| <i>Paradoxurus jerdoni</i>        | 0 | 0 | 0 | 0 |
| <i>Paradoxurus zeylonensis</i>    | 0 | 0 | 0 | 0 |
| <i>Paraechinus aethiopicus</i>    | 0 | 0 | 0 | 0 |
| <i>Parahyaena brunnea</i>         | 0 | 0 | 0 | 0 |
| <i>Parahydromys asper</i>         | 0 | 0 | 0 | 0 |
| <i>Paramelomys levipes</i>        | 0 | 0 | 0 | 0 |
| <i>Paramelomys lorentzii</i>      | 0 | 0 | 0 | 0 |
| <i>Paramelomys moncktoni</i>      | 0 | 0 | 0 | 0 |

|                                 |   |   |   |   |
|---------------------------------|---|---|---|---|
| <i>Paramelomys_platyops</i>     | 0 | 0 | 0 | 0 |
| <i>Paramelomys_rubex</i>        | 0 | 0 | 0 | 0 |
| <i>Paranyctimene_raptor</i>     | 0 | 0 | 0 | 0 |
| <i>Parascalops_breweri</i>      | 0 | 0 | 0 | 0 |
| <i>Parastrellus_hesperus</i>    | 0 | 0 | 0 | 0 |
| <i>Paraxerus_alexandri</i>      | 0 | 0 | 0 | 0 |
| <i>Paraxerus_cepapi</i>         | 0 | 0 | 0 | 0 |
| <i>Paraxerus_ochraceus</i>      | 0 | 0 | 0 | 0 |
| <i>Paraxerus_vexillarius</i>    | 0 | 0 | 0 | 0 |
| <i>Pardofelis_marmorata</i>     | 0 | 0 | 0 | 0 |
| <i>Parotomys_brantsii</i>       | 0 | 0 | 0 | 0 |
| <i>Parotomys_littledalei</i>    | 0 | 0 | 0 | 0 |
| <i>Paruromys_dominator</i>      | 0 | 0 | 0 | 0 |
| <i>Pecari_tajacu</i>            | 0 | 0 | 0 | 0 |
| <i>Pedetes_capensis</i>         | 0 | 0 | 0 | 0 |
| <i>Pelea_capreolus</i>          | 0 | 0 | 0 | 0 |
| <i>Pelomys_campanae</i>         | 0 | 0 | 0 | 0 |
| <i>Pelomys_fallax</i>           | 0 | 0 | 0 | 0 |
| <i>Pentalagus_furnessi</i>      | 0 | 0 | 0 | 0 |
| <i>Penthetor_lucasi</i>         | 0 | 0 | 0 | 0 |
| <i>Peponocephala_electra</i>    | 0 | 0 | 0 | 0 |
| <i>Perodicticus_potto</i>       | 0 | 0 | 0 | 0 |
| <i>Perognathus_amplus</i>       | 0 | 0 | 0 | 0 |
| <i>Perognathus_fasciatus</i>    | 0 | 0 | 0 | 0 |
| <i>Perognathus_flavescens</i>   | 0 | 0 | 0 | 0 |
| <i>Perognathus_flavus</i>       | 0 | 0 | 0 | 0 |
| <i>Perognathus_inornatus</i>    | 0 | 0 | 0 | 0 |
| <i>Perognathus_longimembris</i> | 0 | 0 | 0 | 0 |
| <i>Perognathus_merriami</i>     | 0 | 0 | 0 | 0 |
| <i>Perognathus_parvus</i>       | 0 | 0 | 0 | 0 |
| <i>Peromyscus_attwateri</i>     | 0 | 0 | 0 | 0 |
| <i>Peromyscus_aztecus</i>       | 0 | 0 | 0 | 0 |
| <i>Peromyscus_beatae</i>        | 0 | 0 | 0 | 0 |
| <i>Peromyscus_boyliei</i>       | 0 | 0 | 0 | 0 |
| <i>Peromyscus_californicus</i>  | 0 | 0 | 0 | 0 |
| <i>Peromyscus_caniceps</i>      | 0 | 0 | 0 | 0 |
| <i>Peromyscus_crinitus</i>      | 0 | 0 | 0 | 0 |
| <i>Peromyscus_dickeyi</i>       | 0 | 0 | 0 | 0 |
| <i>Peromyscus_difficilis</i>    | 0 | 0 | 0 | 0 |
| <i>Peromyscus_ereamicus</i>     | 0 | 0 | 0 | 0 |
| <i>Peromyscus_eva</i>           | 0 | 0 | 0 | 0 |
| <i>Peromyscus_fraterculus</i>   | 0 | 0 | 0 | 0 |
| <i>Peromyscus_furvus</i>        | 0 | 0 | 0 | 0 |
| <i>Peromyscus_gossypinus</i>    | 0 | 0 | 0 | 0 |



|                                   |   |   |   |   |
|-----------------------------------|---|---|---|---|
| <i>Peromyscus_grandis</i>         | 0 | 0 | 0 | 0 |
| <i>Peromyscus_gratus</i>          | 0 | 0 | 0 | 0 |
| <i>Peromyscus_guatemalensis</i>   | 0 | 0 | 0 | 0 |
| <i>Peromyscus_gymnotis</i>        | 0 | 0 | 0 | 0 |
| <i>Peromyscus_hooperi</i>         | 0 | 0 | 0 | 0 |
| <i>Peromyscus_hylocetes</i>       | 0 | 0 | 0 | 0 |
| <i>Peromyscus_interparietalis</i> | 0 | 0 | 0 | 0 |
| <i>Peromyscus_keeni</i>           | 0 | 0 | 0 | 0 |
| <i>Peromyscus_leucopus</i>        | 0 | 0 | 0 | 0 |
| <i>Peromyscus_levipes</i>         | 0 | 0 | 0 | 0 |
| <i>Peromyscus_madrensis</i>       | 0 | 0 | 0 | 0 |
| <i>Peromyscus_maniculatus</i>     | 0 | 0 | 0 | 0 |
| <i>Peromyscus_mayensis</i>        | 0 | 0 | 0 | 0 |
| <i>Peromyscus_megalops</i>        | 0 | 0 | 0 | 0 |
| <i>Peromyscus_melanocarpus</i>    | 0 | 0 | 0 | 0 |
| <i>Peromyscus_melanophrys</i>     | 0 | 0 | 0 | 0 |
| <i>Peromyscus_melanotis</i>       | 0 | 0 | 0 | 0 |
| <i>Peromyscus_merriami</i>        | 0 | 0 | 0 | 0 |
| <i>Peromyscus_mexicanus</i>       | 0 | 0 | 0 | 0 |
| <i>Peromyscus_nasutus</i>         | 0 | 0 | 0 | 0 |
| <i>Peromyscus_ochraventer</i>     | 0 | 0 | 0 | 0 |
| <i>Peromyscus_pectoralis</i>      | 0 | 0 | 0 | 0 |
| <i>Peromyscus_perfulvus</i>       | 0 | 0 | 0 | 0 |
| <i>Peromyscus_polionotus</i>      | 0 | 0 | 0 | 0 |
| <i>Peromyscus_polius</i>          | 0 | 0 | 0 | 0 |
| <i>Peromyscus_sagax</i>           | 0 | 0 | 0 | 0 |
| <i>Peromyscus_sejugis</i>         | 0 | 0 | 0 | 0 |
| <i>Peromyscus_simulus</i>         | 0 | 0 | 0 | 0 |
| <i>Peromyscus_slevini</i>         | 0 | 0 | 0 | 0 |
| <i>Peromyscus_spicilegus</i>      | 0 | 0 | 0 | 0 |
| <i>Peromyscus_stephani</i>        | 0 | 0 | 0 | 0 |
| <i>Peromyscus_stirtoni</i>        | 0 | 0 | 0 | 0 |
| <i>Peromyscus_truei</i>           | 0 | 0 | 0 | 0 |
| <i>Peromyscus_winkelmanni</i>     | 0 | 0 | 0 | 0 |
| <i>Peromyscus_yucatanicus</i>     | 0 | 0 | 0 | 0 |
| <i>Peromyscus_zarhynchus</i>      | 0 | 0 | 0 | 0 |
| <i>Peropteryx_kappleri</i>        | 0 | 0 | 0 | 0 |
| <i>Peropteryx_leucoptera</i>      | 0 | 0 | 0 | 0 |
| <i>Peropteryx_macrotis</i>        | 0 | 0 | 0 | 0 |
| <i>Peropteryx_trinitatis</i>      | 0 | 0 | 0 | 0 |
| <i>Petaurillus_kinlochii</i>      | 0 | 0 | 0 | 0 |
| <i>Petaurista_albiventer</i>      | 0 | 0 | 0 | 0 |
| <i>Petaurista_alborufus</i>       | 0 | 0 | 0 | 0 |
| <i>Petaurista_elegans</i>         | 0 | 0 | 0 | 0 |

|                                  |   |   |   |   |
|----------------------------------|---|---|---|---|
| <i>Petaurista_hainana</i>        | 0 | 0 | 0 | 0 |
| <i>Petaurista_leucogenys</i>     | 0 | 0 | 0 | 0 |
| <i>Petaurista_petaurista</i>     | 0 | 0 | 0 | 0 |
| <i>Petaurista_philippensis</i>   | 0 | 0 | 0 | 0 |
| <i>Petaurista_xanthotis</i>      | 0 | 0 | 0 | 0 |
| <i>Petaurista_yunanensis</i>     | 0 | 0 | 0 | 0 |
| <i>Petinomys_setosus</i>         | 0 | 0 | 0 | 0 |
| <i>Petrodromus_tetradactylus</i> | 0 | 0 | 0 | 0 |
| <i>Petromus_typicus</i>          | 0 | 0 | 0 | 0 |
| <i>Petromyscus_collinus</i>      | 0 | 0 | 0 | 0 |
| <i>Petromyscus_monticularis</i>  | 0 | 0 | 0 | 0 |
| <i>Phacochoerus_aethiopicus</i>  | 0 | 0 | 0 | 0 |
| <i>Phacochoerus_africanus</i>    | 0 | 0 | 0 | 0 |
| <i>Phaner_furcifer</i>           | 0 | 0 | 0 | 0 |
| <i>Phenacomys_intermedius</i>    | 0 | 0 | 0 | 0 |
| <i>Phenacomys_ungava</i>         | 0 | 0 | 0 | 0 |
| <i>Philantomba_maxwellii</i>     | 0 | 0 | 0 | 0 |
| <i>Philantomba_monticola</i>     | 0 | 0 | 0 | 0 |
| <i>Philetor_brachypterus</i>     | 0 | 0 | 0 | 0 |
| <i>Phloeomys_cumingi</i>         | 0 | 0 | 0 | 0 |
| <i>Phoca_fasciata</i>            | 0 | 0 | 0 | 0 |
| <i>Phoca_groenlandica</i>        | 0 | 0 | 0 | 0 |
| <i>Phoca_largha</i>              | 0 | 0 | 0 | 0 |
| <i>Phoca_vitulina</i>            | 0 | 0 | 0 | 0 |
| <i>Phocarctos_hookeri</i>        | 0 | 0 | 0 | 0 |
| <i>Phocoena_dioptrica</i>        | 0 | 0 | 0 | 0 |
| <i>Phocoena_phocoena</i>         | 0 | 0 | 0 | 0 |
| <i>Phocoena_sinus</i>            | 0 | 0 | 0 | 0 |
| <i>Phocoena_spinipinnis</i>      | 0 | 0 | 0 | 0 |
| <i>Phocoenoides_dalli</i>        | 0 | 0 | 0 | 0 |
| <i>Phodopus_campbelli</i>        | 0 | 0 | 0 | 0 |
| <i>Phodopus_roborovskii</i>      | 0 | 0 | 0 | 0 |
| <i>Phodopus_sungorus</i>         | 0 | 0 | 0 | 0 |
| <i>Phoniscus_jagorii</i>         | 0 | 0 | 0 | 0 |
| <i>Phylloderma_stenops</i>       | 0 | 0 | 0 | 0 |
| <i>Phyllomys_blainvillii</i>     | 0 | 0 | 0 | 0 |
| <i>Phyllomys_brasiliensis</i>    | 0 | 0 | 0 | 0 |
| <i>Phyllomys_dasythrix</i>       | 0 | 0 | 0 | 0 |
| <i>Phyllomys_lamarum</i>         | 0 | 0 | 0 | 0 |
| <i>Phyllomys_lundi</i>           | 0 | 0 | 0 | 0 |
| <i>Phyllomys_mantiqueirensis</i> | 0 | 0 | 0 | 0 |
| <i>Phyllomys_nigrispinus</i>     | 0 | 0 | 0 | 0 |
| <i>Phyllomys_pattoni</i>         | 0 | 0 | 0 | 0 |
| <i>Phyllomys_sp._ACL-2011</i>    | 0 | 0 | 0 | 0 |

|                                  |   |   |   |   |
|----------------------------------|---|---|---|---|
| <i>Phyllomys_sulinus</i>         | 0 | 0 | 0 | 0 |
| <i>Phyllomys_unicolor</i>        | 0 | 0 | 0 | 0 |
| <i>Phyllonycteris_aphylla</i>    | 0 | 0 | 0 | 0 |
| <i>Phyllonycteris_poeyi</i>      | 0 | 0 | 0 | 0 |
| <i>Phyllops_falcatus</i>         | 0 | 0 | 0 | 0 |
| <i>Phyllostomus_discolor</i>     | 0 | 0 | 0 | 0 |
| <i>Phyllostomus_elongatus</i>    | 0 | 0 | 0 | 0 |
| <i>Phyllostomus_hastatus</i>     | 0 | 0 | 0 | 0 |
| <i>Phyllostomus_latifolius</i>   | 0 | 0 | 0 | 0 |
| <i>Phyllotis_amicus</i>          | 0 | 0 | 0 | 0 |
| <i>Phyllotis_andium</i>          | 0 | 0 | 0 | 0 |
| <i>Phyllotis_bonariensis</i>     | 0 | 0 | 0 | 0 |
| <i>Phyllotis_darwini</i>         | 0 | 0 | 0 | 0 |
| <i>Phyllotis_limatus</i>         | 0 | 0 | 0 | 0 |
| <i>Phyllotis_magister</i>        | 0 | 0 | 0 | 0 |
| <i>Phyllotis_osgoodi</i>         | 0 | 0 | 0 | 0 |
| <i>Phyllotis_osilae</i>          | 0 | 0 | 0 | 0 |
| <i>Phyllotis_wolffsohni</i>      | 0 | 0 | 0 | 0 |
| <i>Phyllotis_xanthopygus</i>     | 0 | 0 | 0 | 0 |
| <i>Physeter_catodon</i>          | 0 | 0 | 0 | 0 |
| <i>Piliocolobus_badius</i>       | 0 | 0 | 0 | 0 |
| <i>Piliocolobus_foai</i>         | 0 | 0 | 0 | 0 |
| <i>Piliocolobus_gordonorum</i>   | 0 | 0 | 0 | 0 |
| <i>Piliocolobus_kirkii</i>       | 0 | 0 | 0 | 0 |
| <i>Piliocolobus_pennantii</i>    | 0 | 0 | 0 | 0 |
| <i>Piliocolobus_preussi</i>      | 0 | 0 | 0 | 0 |
| <i>Piliocolobus_rufomitratu</i>  | 0 | 0 | 0 | 0 |
| <i>Piliocolobus_tephrosceles</i> | 0 | 0 | 0 | 0 |
| <i>Piliocolobus_tholloni</i>     | 0 | 0 | 0 | 0 |
| <i>Pipanacoctomys_aureus</i>     | 0 | 0 | 0 | 0 |
| <i>Pipistrellus_abramus</i>      | 0 | 0 | 0 | 0 |
| <i>Pipistrellus_coromandra</i>   | 0 | 0 | 0 | 0 |
| <i>Pipistrellus_deserti</i>      | 0 | 0 | 0 | 0 |
| <i>Pipistrellus_hesperidus</i>   | 0 | 0 | 0 | 0 |
| <i>Pipistrellus_javanicus</i>    | 0 | 0 | 0 | 0 |
| <i>Pipistrellus_kuhlii</i>       | 0 | 0 | 0 | 0 |
| <i>Pipistrellus_maderensis</i>   | 0 | 0 | 0 | 0 |
| <i>Pipistrellus_nanulus</i>      | 0 | 0 | 0 | 0 |
| <i>Pipistrellus_nathusii</i>     | 0 | 0 | 0 | 0 |
| <i>Pipistrellus_paterculus</i>   | 0 | 0 | 0 | 0 |
| <i>Pipistrellus_pipistrellus</i> | 0 | 0 | 0 | 0 |
| <i>Pipistrellus_pygmaeus</i>     | 0 | 0 | 0 | 0 |
| <i>Pipistrellus_rueppellii</i>   | 0 | 0 | 0 | 0 |
| <i>Pipistrellus_rusticus</i>     | 0 | 0 | 0 | 0 |

|                                    |   |   |   |   |
|------------------------------------|---|---|---|---|
| <i>Pipistrellus_stenopterus</i>    | 0 | 0 | 0 | 0 |
| <i>Pipistrellus_subflavus</i>      | 0 | 0 | 0 | 0 |
| <i>Pipistrellus_tenuis</i>         | 0 | 0 | 0 | 0 |
| <i>Pithecia_irrorata</i>           | 0 | 0 | 0 | 0 |
| <i>Pithecia_monachus</i>           | 0 | 0 | 0 | 0 |
| <i>Pithecia_pithecia</i>           | 0 | 0 | 0 | 0 |
| <i>Platalina_genovensium</i>       | 0 | 0 | 0 | 0 |
| <i>Platanista_gangetica</i>        | 0 | 0 | 0 | 0 |
| <i>Platanista_minor</i>            | 0 | 0 | 0 | 0 |
| <i>Platyrrhinus_aurarius</i>       | 0 | 0 | 0 | 0 |
| <i>Platyrrhinus_brachycephalus</i> | 0 | 0 | 0 | 0 |
| <i>Platyrrhinus_dorsalis</i>       | 0 | 0 | 0 | 0 |
| <i>Platyrrhinus_helleri</i>        | 0 | 0 | 0 | 0 |
| <i>Platyrrhinus_infuscus</i>       | 0 | 0 | 0 | 0 |
| <i>Platyrrhinus_lineatus</i>       | 0 | 0 | 0 | 0 |
| <i>Platyrrhinus_recifinus</i>      | 0 | 0 | 0 | 0 |
| <i>Platyrrhinus_vittatus</i>       | 0 | 0 | 0 | 0 |
| <i>Plecotus_auritus</i>            | 0 | 0 | 0 | 0 |
| <i>Plecotus_austriacus</i>         | 0 | 0 | 0 | 0 |
| <i>Plecotus_kolombatovici</i>      | 0 | 0 | 0 | 0 |
| <i>Plecotus_macrobullaris</i>      | 0 | 0 | 0 | 0 |
| <i>Plecotus_rafinesquii</i>        | 0 | 0 | 0 | 0 |
| <i>Plecotus_sp.</i>                | 0 | 0 | 0 | 0 |
| <i>Plecotus_teneriffae</i>         | 0 | 0 | 0 | 0 |
| <i>Podogymnura_truei</i>           | 0 | 0 | 0 | 0 |
| <i>Podomys_floridanus</i>          | 0 | 0 | 0 | 0 |
| <i>Poecilogale_albinucha</i>       | 0 | 0 | 0 | 0 |
| <i>Poelagus_marjorita</i>          | 0 | 0 | 0 | 0 |
| <i>Pogonomelomys_mayeri</i>        | 0 | 0 | 0 | 0 |
| <i>Pogonomys_loriae</i>            | 0 | 0 | 0 | 0 |
| <i>Pogonomys_macrourus</i>         | 0 | 0 | 0 | 0 |
| <i>Pogonomys_sylvestris</i>        | 0 | 0 | 0 | 0 |
| <i>Poiana_richardsonii</i>         | 0 | 0 | 0 | 0 |
| <i>Poliocitellus_franklinii</i>    | 0 | 0 | 0 | 0 |
| <i>Pongo_abelii</i>                | 0 | 0 | 0 | 0 |
| <i>Pongo_pygmaeus</i>              | 0 | 0 | 0 | 0 |
| <i>Pontoporia_blainvillei</i>      | 0 | 0 | 0 | 0 |
| <i>Potamochoerus_larvatus</i>      | 0 | 0 | 0 | 0 |
| <i>Potamochoerus_porcus</i>        | 0 | 0 | 0 | 0 |
| <i>Potamogale_velox</i>            | 0 | 0 | 0 | 0 |
| <i>Potos_flavus</i>                | 0 | 0 | 0 | 0 |
| <i>Praomys_daltoni</i>             | 0 | 0 | 0 | 0 |
| <i>Praomys_degraaffi</i>           | 0 | 0 | 0 | 0 |
| <i>Praomys_delectorum</i>          | 0 | 0 | 0 | 0 |

|                                  |   |   |   |   |
|----------------------------------|---|---|---|---|
| <i>Praomys_derooi</i>            | 0 | 0 | 0 | 0 |
| <i>Praomys_hartwigi</i>          | 0 | 0 | 0 | 0 |
| <i>Praomys_jacksoni</i>          | 0 | 0 | 0 | 0 |
| <i>Praomys_lukolelae</i>         | 0 | 0 | 0 | 0 |
| <i>Praomys_minor</i>             | 0 | 0 | 0 | 0 |
| <i>Praomys_misonnei</i>          | 0 | 0 | 0 | 0 |
| <i>Praomys_morio</i>             | 0 | 0 | 0 | 0 |
| <i>Praomys_mutoni</i>            | 0 | 0 | 0 | 0 |
| <i>Praomys_obscurus</i>          | 0 | 0 | 0 | 0 |
| <i>Praomys_petteri</i>           | 0 | 0 | 0 | 0 |
| <i>Praomys_rostratus</i>         | 0 | 0 | 0 | 0 |
| <i>Praomys_sp._ADM-2011</i>      | 0 | 0 | 0 | 0 |
| <i>Praomys_tullbergi</i>         | 0 | 0 | 0 | 0 |
| <i>Praomys_verschureni</i>       | 0 | 0 | 0 | 0 |
| <i>Presbytis_chrysomelas</i>     | 0 | 0 | 0 | 0 |
| <i>Presbytis_comata</i>          | 0 | 0 | 0 | 0 |
| <i>Presbytis_femoralis</i>       | 0 | 0 | 0 | 0 |
| <i>Presbytis_frontata</i>        | 0 | 0 | 0 | 0 |
| <i>Presbytis_hosei</i>           | 0 | 0 | 0 | 0 |
| <i>Presbytis_melalophos</i>      | 0 | 0 | 0 | 0 |
| <i>Presbytis_potenziani</i>      | 0 | 0 | 0 | 0 |
| <i>Presbytis_rubicunda</i>       | 0 | 0 | 0 | 0 |
| <i>Presbytis_thomasi</i>         | 0 | 0 | 0 | 0 |
| <i>Priodontes_maximus</i>        | 0 | 0 | 0 | 0 |
| <i>Prionailurus_bengalensis</i>  | 0 | 0 | 0 | 0 |
| <i>Prionailurus_iriomotensis</i> | 0 | 0 | 0 | 0 |
| <i>Prionailurus_planiceps</i>    | 0 | 0 | 0 | 0 |
| <i>Prionailurus_rubiginosa</i>   | 0 | 0 | 0 | 0 |
| <i>Prionailurus_viverrinus</i>   | 0 | 0 | 0 | 0 |
| <i>Prionodon_linsang</i>         | 0 | 0 | 0 | 0 |
| <i>Prionodon_pardicolor</i>      | 0 | 0 | 0 | 0 |
| <i>Procapra_gutturosa</i>        | 0 | 0 | 0 | 0 |
| <i>Procapra_picticaudata</i>     | 0 | 0 | 0 | 0 |
| <i>Procapra_przewalskii</i>      | 0 | 0 | 0 | 0 |
| <i>Procavia_capensis</i>         | 0 | 0 | 0 | 0 |
| <i>Procolobus_verus</i>          | 0 | 0 | 0 | 0 |
| <i>Procyon_cancrivorus</i>       | 0 | 0 | 0 | 0 |
| <i>Procyon_lotor</i>             | 0 | 0 | 0 | 0 |
| <i>Proechimys_cuvieri</i>        | 0 | 0 | 0 | 0 |
| <i>Proechimys_guairae</i>        | 0 | 0 | 0 | 0 |
| <i>Proechimys_guyannensis</i>    | 0 | 0 | 0 | 0 |
| <i>Proechimys_hoplomyoides</i>   | 0 | 0 | 0 | 0 |
| <i>Proechimys_longicaudatus</i>  | 0 | 0 | 0 | 0 |
| <i>Proechimys_oris</i>           | 0 | 0 | 0 | 0 |

|                                     |   |   |   |   |
|-------------------------------------|---|---|---|---|
| <i>Proechimys_quadruplicatus</i>    | 0 | 0 | 0 | 0 |
| <i>Proechimys_roberti</i>           | 0 | 0 | 0 | 0 |
| <i>Proechimys_simonsi</i>           | 0 | 0 | 0 | 0 |
| <i>Proechimys_steerei</i>           | 0 | 0 | 0 | 0 |
| <i>Proedromys_bedfordi</i>          | 0 | 0 | 0 | 0 |
| <i>Profelis_aurata</i>              | 0 | 0 | 0 | 0 |
| <i>Prometheomys_schaposchnikowi</i> | 0 | 0 | 0 | 0 |
| <i>Promops_centralis</i>            | 0 | 0 | 0 | 0 |
| <i>Pronolagus_crassicaudatus</i>    | 0 | 0 | 0 | 0 |
| <i>Pronolagus_randensis</i>         | 0 | 0 | 0 | 0 |
| <i>Pronolagus_rupestris</i>         | 0 | 0 | 0 | 0 |
| <i>Pronolagus_saundersiae</i>       | 0 | 0 | 0 | 0 |
| <i>Propithecus_coquereli</i>        | 0 | 0 | 0 | 0 |
| <i>Propithecus_deckenii</i>         | 0 | 0 | 0 | 0 |
| <i>Propithecus_diadema</i>          | 0 | 0 | 0 | 0 |
| <i>Propithecus_edwardsi</i>         | 0 | 0 | 0 | 0 |
| <i>Propithecus_perrieri</i>         | 0 | 0 | 0 | 0 |
| <i>Propithecus_tattersalli</i>      | 0 | 0 | 0 | 0 |
| <i>Propithecus_verreauxi</i>        | 0 | 0 | 0 | 0 |
| <i>Prosciurillus_murinus</i>        | 0 | 0 | 0 | 0 |
| <i>Proteles_cristatus</i>           | 0 | 0 | 0 | 0 |
| <i>Protoxerus_stangeri</i>          | 0 | 0 | 0 | 0 |
| <i>Przewalskium_albirostris</i>     | 0 | 0 | 0 | 0 |
| <i>Psammomys_obesus</i>             | 0 | 0 | 0 | 0 |
| <i>Psammomys_vexillaris</i>         | 0 | 0 | 0 | 0 |
| <i>Pseudohydromys_ellermani</i>     | 0 | 0 | 0 | 0 |
| <i>Pseudois_nayaur</i>              | 0 | 0 | 0 | 0 |
| <i>Pseudois_schaeferi</i>           | 0 | 0 | 0 | 0 |
| <i>Pseudomys_albocinereus</i>       | 0 | 0 | 0 | 0 |
| <i>Pseudomys_apodemoides</i>        | 0 | 0 | 0 | 0 |
| <i>Pseudomys_australis</i>          | 0 | 0 | 0 | 0 |
| <i>Pseudomys_bolami</i>             | 0 | 0 | 0 | 0 |
| <i>Pseudomys_calabyi</i>            | 0 | 0 | 0 | 0 |
| <i>Pseudomys_chapmani</i>           | 0 | 0 | 0 | 0 |
| <i>Pseudomys_delicatulus</i>        | 0 | 0 | 0 | 0 |
| <i>Pseudomys_desertor</i>           | 0 | 0 | 0 | 0 |
| <i>Pseudomys_fieldi</i>             | 0 | 0 | 0 | 0 |
| <i>Pseudomys_fumeus</i>             | 0 | 0 | 0 | 0 |
| <i>Pseudomys_gracilicaudatus</i>    | 0 | 0 | 0 | 0 |
| <i>Pseudomys_hermannsburgensis</i>  | 0 | 0 | 0 | 0 |
| <i>Pseudomys_higginsii</i>          | 0 | 0 | 0 | 0 |
| <i>Pseudomys_johnsoni</i>           | 0 | 0 | 0 | 0 |
| <i>Pseudomys_laborifex</i>          | 0 | 0 | 0 | 0 |
| <i>Pseudomys_nanus</i>              | 0 | 0 | 0 | 0 |

|                                   |   |   |   |   |
|-----------------------------------|---|---|---|---|
| <i>Pseudomys_novaehollandiae</i>  | 0 | 0 | 0 | 0 |
| <i>Pseudomys_occidentalis</i>     | 0 | 0 | 0 | 0 |
| <i>Pseudomys_oralis</i>           | 0 | 0 | 0 | 0 |
| <i>Pseudomys_patrius</i>          | 0 | 0 | 0 | 0 |
| <i>Pseudomys_pilligaensis</i>     | 0 | 0 | 0 | 0 |
| <i>Pseudomys_shortridgei</i>      | 0 | 0 | 0 | 0 |
| <i>Pseudorca_crassidens</i>       | 0 | 0 | 0 | 0 |
| <i>Pseudoryx_nghetinhensis</i>    | 0 | 0 | 0 | 0 |
| <i>Pseudoryzomys_simplex</i>      | 0 | 0 | 0 | 0 |
| <i>Ptenochirus_jagori</i>         | 0 | 0 | 0 | 0 |
| <i>Ptenochirus_minor</i>          | 0 | 0 | 0 | 0 |
| <i>Pteralopex_acrodonta</i>       | 0 | 0 | 0 | 0 |
| <i>Pteralopex_atrata</i>          | 0 | 0 | 0 | 0 |
| <i>Pteromys_momonga</i>           | 0 | 0 | 0 | 0 |
| <i>Pteromys_volans</i>            | 0 | 0 | 0 | 0 |
| <i>Pteromyiscus_pulverulentus</i> | 0 | 0 | 0 | 0 |
| <i>Pteronotus_davyi</i>           | 0 | 0 | 0 | 0 |
| <i>Pteronotus_gymnotus</i>        | 0 | 0 | 0 | 0 |
| <i>Pteronotus_macleayii</i>       | 0 | 0 | 0 | 0 |
| <i>Pteronotus_parnellii</i>       | 0 | 0 | 0 | 0 |
| <i>Pteronotus_personatus</i>      | 0 | 0 | 0 | 0 |
| <i>Pteronotus_quadridens</i>      | 0 | 0 | 0 | 0 |
| <i>Pteronura_brasiliensis</i>     | 0 | 0 | 0 | 0 |
| <i>Pteropus_admiralitatum</i>     | 0 | 0 | 0 | 0 |
| <i>Pteropus_aldabrensis</i>       | 0 | 0 | 0 | 0 |
| <i>Pteropus_alecto</i>            | 0 | 0 | 0 | 0 |
| <i>Pteropus_anetianus</i>         | 0 | 0 | 0 | 0 |
| <i>Pteropus_cognatus</i>          | 0 | 0 | 0 | 0 |
| <i>Pteropus_conspicillatus</i>    | 0 | 0 | 0 | 0 |
| <i>Pteropus_dasymallus</i>        | 0 | 0 | 0 | 0 |
| <i>Pteropus_fundatus</i>          | 0 | 0 | 0 | 0 |
| <i>Pteropus_giganteus</i>         | 0 | 0 | 0 | 0 |
| <i>Pteropus_hypomelanus</i>       | 0 | 0 | 0 | 0 |
| <i>Pteropus_livingstonii</i>      | 0 | 0 | 0 | 0 |
| <i>Pteropus_lylei</i>             | 0 | 0 | 0 | 0 |
| <i>Pteropus_macrotis</i>          | 0 | 0 | 0 | 0 |
| <i>Pteropus_mariannus</i>         | 0 | 0 | 0 | 0 |
| <i>Pteropus_molossinus</i>        | 0 | 0 | 0 | 0 |
| <i>Pteropus_neohibernicus</i>     | 0 | 0 | 0 | 0 |
| <i>Pteropus_niger</i>             | 0 | 0 | 0 | 0 |
| <i>Pteropus_ocularis</i>          | 0 | 0 | 0 | 0 |
| <i>Pteropus_ornatus</i>           | 0 | 0 | 0 | 0 |
| <i>Pteropus_personatus</i>        | 0 | 0 | 0 | 0 |
| <i>Pteropus_pohlei</i>            | 0 | 0 | 0 | 0 |

|                               |   |   |   |   |
|-------------------------------|---|---|---|---|
| <i>Pteropus_poliocephalus</i> | 0 | 0 | 0 | 0 |
| <i>Pteropus_pumilus</i>       | 0 | 0 | 0 | 0 |
| <i>Pteropus_rayneri</i>       | 0 | 0 | 0 | 0 |
| <i>Pteropus_rodricensis</i>   | 0 | 0 | 0 | 0 |
| <i>Pteropus_rufus</i>         | 0 | 0 | 0 | 0 |
| <i>Pteropus_samoensis</i>     | 0 | 0 | 0 | 0 |
| <i>Pteropus_scapulatus</i>    | 0 | 0 | 0 | 0 |
| <i>Pteropus_seychellensis</i> | 0 | 0 | 0 | 0 |
| <i>Pteropus_speciosus</i>     | 0 | 0 | 0 | 0 |
| <i>Pteropus_temminckii</i>    | 0 | 0 | 0 | 0 |
| <i>Pteropus_tonganus</i>      | 0 | 0 | 0 | 0 |
| <i>Pteropus_vampyrus</i>      | 0 | 0 | 0 | 0 |
| <i>Pteropus_vetulus</i>       | 0 | 0 | 0 | 0 |
| <i>Pteropus_voeltzkowi</i>    | 0 | 0 | 0 | 0 |
| <i>Pteropus_woodfordi</i>     | 0 | 0 | 0 | 0 |
| <i>Ptilocercus_lowii</i>      | 0 | 0 | 0 | 0 |
| <i>Pudu_mephistophiles</i>    | 0 | 0 | 0 | 0 |
| <i>Pudu_puda</i>              | 0 | 0 | 0 | 0 |
| <i>Puma_concolor</i>          | 0 | 0 | 0 | 0 |
| <i>Pusa_caspica</i>           | 0 | 0 | 0 | 0 |
| <i>Pusa_hispida</i>           | 0 | 0 | 0 | 0 |
| <i>Pusa_sibirica</i>          | 0 | 0 | 0 | 0 |
| <i>Pygathrix_cinerea</i>      | 0 | 0 | 0 | 0 |
| <i>Pygathrix_nemaeus</i>      | 0 | 0 | 0 | 0 |
| <i>Pygathrix_nigripes</i>     | 0 | 0 | 0 | 0 |
| <i>Pygeretmus_pumilio</i>     | 0 | 0 | 0 | 0 |
| <i>Pygoderma_bilabiatum</i>   | 0 | 0 | 0 | 0 |
| <i>Rangifer_tarandus</i>      | 0 | 0 | 0 | 0 |
| <i>Raphicerus_campestris</i>  | 0 | 0 | 0 | 0 |
| <i>Raphicerus_melanotis</i>   | 0 | 0 | 0 | 0 |
| <i>Raphicerus_sharpei</i>     | 0 | 0 | 0 | 0 |
| <i>Rattus_andamanensis</i>    | 0 | 0 | 0 | 0 |
| <i>Rattus_argentiventer</i>   | 0 | 0 | 0 | 0 |
| <i>Rattus_baluensis</i>       | 0 | 0 | 0 | 0 |
| <i>Rattus_colletti</i>        | 0 | 0 | 0 | 0 |
| <i>Rattus_everetti</i>        | 0 | 0 | 0 | 0 |
| <i>Rattus_exulans</i>         | 0 | 0 | 0 | 0 |
| <i>Rattus_fuscipes</i>        | 0 | 0 | 0 | 0 |
| <i>Rattus_giluwensis</i>      | 0 | 0 | 0 | 0 |
| <i>Rattus_hoffmanni</i>       | 0 | 0 | 0 | 0 |
| <i>Rattus_leucopus</i>        | 0 | 0 | 0 | 0 |
| <i>Rattus_losea</i>           | 0 | 0 | 0 | 0 |
| <i>Rattus_lutreolus</i>       | 0 | 0 | 0 | 0 |
| <i>Rattus_mordax</i>          | 0 | 0 | 0 | 0 |



|                                     |   |   |   |   |
|-------------------------------------|---|---|---|---|
| <i>Rattus_niobe</i>                 | 0 | 0 | 0 | 0 |
| <i>Rattus_nitidus</i>               | 0 | 0 | 0 | 0 |
| <i>Rattus_norvegicus</i>            | 0 | 0 | 0 | 0 |
| <i>Rattus_novaeguineae</i>          | 0 | 0 | 0 | 0 |
| <i>Rattus_praetor</i>               | 0 | 0 | 0 | 0 |
| <i>Rattus_pycctoris</i>             | 0 | 0 | 0 | 0 |
| <i>Rattus_rattus</i>                | 0 | 0 | 0 | 0 |
| <i>Rattus_satarae</i>               | 0 | 0 | 0 | 0 |
| <i>Rattus_sordidus</i>              | 0 | 0 | 0 | 0 |
| <i>Rattus_steini</i>                | 0 | 0 | 0 | 0 |
| <i>Rattus_tanezumi</i>              | 0 | 0 | 0 | 0 |
| <i>Rattus_tiomanicus</i>            | 0 | 0 | 0 | 0 |
| <i>Rattus_tunneyi</i>               | 0 | 0 | 0 | 0 |
| <i>Rattus_verecundus</i>            | 0 | 0 | 0 | 0 |
| <i>Rattus_villosissimus</i>         | 0 | 0 | 0 | 0 |
| <i>Ratufa_affinis</i>               | 0 | 0 | 0 | 0 |
| <i>Ratufa_bicolor</i>               | 0 | 0 | 0 | 0 |
| <i>Redunca_arundinum</i>            | 0 | 0 | 0 | 0 |
| <i>Redunca_fulvorufula</i>          | 0 | 0 | 0 | 0 |
| <i>Redunca_redunca</i>              | 0 | 0 | 0 | 0 |
| <i>Reithrodon_auritus</i>           | 0 | 0 | 0 | 0 |
| <i>Reithrodontomys_brevirostris</i> | 0 | 0 | 0 | 0 |
| <i>Reithrodontomys_chrysopsis</i>   | 0 | 0 | 0 | 0 |
| <i>Reithrodontomys_creper</i>       | 0 | 0 | 0 | 0 |
| <i>Reithrodontomys_fulvescens</i>   | 0 | 0 | 0 | 0 |
| <i>Reithrodontomys_gracilis</i>     | 0 | 0 | 0 | 0 |
| <i>Reithrodontomys_hirsutus</i>     | 0 | 0 | 0 | 0 |
| <i>Reithrodontomys_humulis</i>      | 0 | 0 | 0 | 0 |
| <i>Reithrodontomys_megalotis</i>    | 0 | 0 | 0 | 0 |
| <i>Reithrodontomys_mexicanus</i>    | 0 | 0 | 0 | 0 |
| <i>Reithrodontomys_microdon</i>     | 0 | 0 | 0 | 0 |
| <i>Reithrodontomys_montanus</i>     | 0 | 0 | 0 | 0 |
| <i>Reithrodontomys_raviventris</i>  | 0 | 0 | 0 | 0 |
| <i>Reithrodontomys_spectabilis</i>  | 0 | 0 | 0 | 0 |
| <i>Reithrodontomys_sumichrasti</i>  | 0 | 0 | 0 | 0 |
| <i>Reithrodontomys_tenuirostris</i> | 0 | 0 | 0 | 0 |
| <i>Reithrodontomys_zacatecae</i>    | 0 | 0 | 0 | 0 |
| <i>Rhabdomys_dilectus</i>           | 0 | 0 | 0 | 0 |
| <i>Rhabdomys_pumilio</i>            | 0 | 0 | 0 | 0 |
| <i>Rhagomys_rufescens</i>           | 0 | 0 | 0 | 0 |
| <i>Rheithrosciurus_macrotis</i>     | 0 | 0 | 0 | 0 |
| <i>Rheomys_raptor</i>               | 0 | 0 | 0 | 0 |
| <i>Rheomys_thomasi</i>              | 0 | 0 | 0 | 0 |
| <i>Rhinoceros_sondaicus</i>         | 0 | 0 | 0 | 0 |

|                                   |   |   |   |   |
|-----------------------------------|---|---|---|---|
| <i>Rhinoceros_unicornis</i>       | 0 | 0 | 0 | 0 |
| <i>Rhinolophus_acuminatus</i>     | 0 | 0 | 0 | 0 |
| <i>Rhinolophus_affinis</i>        | 0 | 0 | 0 | 0 |
| <i>Rhinolophus_alcyone</i>        | 0 | 0 | 0 | 0 |
| <i>Rhinolophus_arquatus</i>       | 0 | 0 | 0 | 0 |
| <i>Rhinolophus_beddomei</i>       | 0 | 0 | 0 | 0 |
| <i>Rhinolophus_blasii</i>         | 0 | 0 | 0 | 0 |
| <i>Rhinolophus_blythi</i>         | 0 | 0 | 0 | 0 |
| <i>Rhinolophus_borneensis</i>     | 0 | 0 | 0 | 0 |
| <i>Rhinolophus_capensis</i>       | 0 | 0 | 0 | 0 |
| <i>Rhinolophus_celebensis</i>     | 0 | 0 | 0 | 0 |
| <i>Rhinolophus_clivosus</i>       | 0 | 0 | 0 | 0 |
| <i>Rhinolophus_coelophyllus</i>   | 0 | 0 | 0 | 0 |
| <i>Rhinolophus_cornutus</i>       | 0 | 0 | 0 | 0 |
| <i>Rhinolophus_creaghi</i>        | 0 | 0 | 0 | 0 |
| <i>Rhinolophus_darlingi</i>       | 0 | 0 | 0 | 0 |
| <i>Rhinolophus_denti</i>          | 0 | 0 | 0 | 0 |
| <i>Rhinolophus_eloquens</i>       | 0 | 0 | 0 | 0 |
| <i>Rhinolophus_euryale</i>        | 0 | 0 | 0 | 0 |
| <i>Rhinolophus_euryotis</i>       | 0 | 0 | 0 | 0 |
| <i>Rhinolophus_ferrumequinum</i>  | 0 | 0 | 0 | 0 |
| <i>Rhinolophus_formosae</i>       | 0 | 0 | 0 | 0 |
| <i>Rhinolophus_fumigatus</i>      | 0 | 0 | 0 | 0 |
| <i>Rhinolophus_hildebrandti</i>   | 0 | 0 | 0 | 0 |
| <i>Rhinolophus_hipposideros</i>   | 0 | 0 | 0 | 0 |
| <i>Rhinolophus_landeri</i>        | 0 | 0 | 0 | 0 |
| <i>Rhinolophus_lepidus</i>        | 0 | 0 | 0 | 0 |
| <i>Rhinolophus_luctus</i>         | 0 | 0 | 0 | 0 |
| <i>Rhinolophus_maclaudi</i>       | 0 | 0 | 0 | 0 |
| <i>Rhinolophus_macrotis</i>       | 0 | 0 | 0 | 0 |
| <i>Rhinolophus_malayanus</i>      | 0 | 0 | 0 | 0 |
| <i>Rhinolophus_marshalli</i>      | 0 | 0 | 0 | 0 |
| <i>Rhinolophus_megaphyllus</i>    | 0 | 0 | 0 | 0 |
| <i>Rhinolophus_mehelyi</i>        | 0 | 0 | 0 | 0 |
| <i>Rhinolophus_monoceros</i>      | 0 | 0 | 0 | 0 |
| <i>Rhinolophus_osgoodi</i>        | 0 | 0 | 0 | 0 |
| <i>Rhinolophus_paradoxolophus</i> | 0 | 0 | 0 | 0 |
| <i>Rhinolophus_pearsonii</i>      | 0 | 0 | 0 | 0 |
| <i>Rhinolophus_philippinensis</i> | 0 | 0 | 0 | 0 |
| <i>Rhinolophus_pumilus</i>        | 0 | 0 | 0 | 0 |
| <i>Rhinolophus_pusillus</i>       | 0 | 0 | 0 | 0 |
| <i>Rhinolophus_rex</i>            | 0 | 0 | 0 | 0 |
| <i>Rhinolophus_robinsoni</i>      | 0 | 0 | 0 | 0 |
| <i>Rhinolophus_rouxii</i>         | 0 | 0 | 0 | 0 |

|                                  |   |   |   |   |
|----------------------------------|---|---|---|---|
| <i>Rhinolophus_rufus</i>         | 0 | 0 | 0 | 0 |
| <i>Rhinolophus_ruwenzorii</i>    | 0 | 0 | 0 | 0 |
| <i>Rhinolophus_sedulus</i>       | 0 | 0 | 0 | 0 |
| <i>Rhinolophus_shameli</i>       | 0 | 0 | 0 | 0 |
| <i>Rhinolophus_siamensis</i>     | 0 | 0 | 0 | 0 |
| <i>Rhinolophus_simulator</i>     | 0 | 0 | 0 | 0 |
| <i>Rhinolophus_sinicus</i>       | 0 | 0 | 0 | 0 |
| <i>Rhinolophus_stheno</i>        | 0 | 0 | 0 | 0 |
| <i>Rhinolophus_subrufus</i>      | 0 | 0 | 0 | 0 |
| <i>Rhinolophus_swinnnyi</i>      | 0 | 0 | 0 | 0 |
| <i>Rhinolophus_thomasi</i>       | 0 | 0 | 0 | 0 |
| <i>Rhinolophus_trifoliatus</i>   | 0 | 0 | 0 | 0 |
| <i>Rhinonictoris_aurantia</i>    | 0 | 0 | 0 | 0 |
| <i>Rhinophylla_alethina</i>      | 0 | 0 | 0 | 0 |
| <i>Rhinophylla_fischeriae</i>    | 0 | 0 | 0 | 0 |
| <i>Rhinophylla_pumilio</i>       | 0 | 0 | 0 | 0 |
| <i>Rhinopithecus_avunculus</i>   | 0 | 0 | 0 | 0 |
| <i>Rhinopithecus_bieti</i>       | 0 | 0 | 0 | 0 |
| <i>Rhinopithecus_brelichi</i>    | 0 | 0 | 0 | 0 |
| <i>Rhinopithecus_roxellana</i>   | 0 | 0 | 0 | 0 |
| <i>Rhinopithecus_strykeri</i>    | 0 | 0 | 0 | 0 |
| <i>Rhinopoma_hardwickii</i>      | 0 | 0 | 0 | 0 |
| <i>Rhinopoma_microphyllum</i>    | 0 | 0 | 0 | 0 |
| <i>Rhinopoma_muscatellum</i>     | 0 | 0 | 0 | 0 |
| <i>Rhinosciurus_laticaudatus</i> | 0 | 0 | 0 | 0 |
| <i>Rhipidomys_emiliae</i>        | 0 | 0 | 0 | 0 |
| <i>Rhipidomys_leucodactylus</i>  | 0 | 0 | 0 | 0 |
| <i>Rhipidomys_macconnelli</i>    | 0 | 0 | 0 | 0 |
| <i>Rhipidomys_macrurus</i>       | 0 | 0 | 0 | 0 |
| <i>Rhipidomys_mastacalis</i>     | 0 | 0 | 0 | 0 |
| <i>Rhipidomys_nitela</i>         | 0 | 0 | 0 | 0 |
| <i>Rhipidomys_wetzeli</i>        | 0 | 0 | 0 | 0 |
| <i>Rhizomys_pruinosus</i>        | 0 | 0 | 0 | 0 |
| <i>Rhizomys_sinensis</i>         | 0 | 0 | 0 | 0 |
| <i>Rhogeessa_aeneus</i>          | 0 | 0 | 0 | 0 |
| <i>Rhogeessa_alleni</i>          | 0 | 0 | 0 | 0 |
| <i>Rhogeessa_genowaysi</i>       | 0 | 0 | 0 | 0 |
| <i>Rhogeessa_gracilis</i>        | 0 | 0 | 0 | 0 |
| <i>Rhogeessa_io</i>              | 0 | 0 | 0 | 0 |
| <i>Rhogeessa_mira</i>            | 0 | 0 | 0 | 0 |
| <i>Rhogeessa_parvula</i>         | 0 | 0 | 0 | 0 |
| <i>Rhogeessa_tumida</i>          | 0 | 0 | 0 | 0 |
| <i>Rhombomys_opimus</i>          | 0 | 0 | 0 | 0 |
| <i>Rhynchocyon_chrysopygus</i>   | 0 | 0 | 0 | 0 |

|                                   |   |   |   |   |
|-----------------------------------|---|---|---|---|
| <i>Rhynchocyon_cirnei</i>         | 0 | 0 | 0 | 0 |
| <i>Rhynchocyon_petersi</i>        | 0 | 0 | 0 | 0 |
| <i>Rhynchogale_melleri</i>        | 0 | 0 | 0 | 0 |
| <i>Rhynchomys_isarogensis</i>     | 0 | 0 | 0 | 0 |
| <i>Rhynchonycteris_naso</i>       | 0 | 0 | 0 | 0 |
| <i>Romerolagus_diazi</i>          | 0 | 0 | 0 | 0 |
| <i>Rousettus_aegyptiacus</i>      | 0 | 0 | 0 | 0 |
| <i>Rousettus_amplexicaudatus</i>  | 0 | 0 | 0 | 0 |
| <i>Rousettus_celebensis</i>       | 0 | 0 | 0 | 0 |
| <i>Rousettus_leschenaultii</i>    | 0 | 0 | 0 | 0 |
| <i>Rousettus_madagascariensis</i> | 0 | 0 | 0 | 0 |
| <i>Rousettus_obliviosus</i>       | 0 | 0 | 0 | 0 |
| <i>Rousettus_spinalatus</i>       | 0 | 0 | 0 | 0 |
| <i>Rubrisciurus_rubriventer</i>   | 0 | 0 | 0 | 0 |
| <i>Rucervus_duvaucelii</i>        | 0 | 0 | 0 | 0 |
| <i>Rucervus_eldi</i>              | 0 | 0 | 0 | 0 |
| <i>Rucervus_schomburgki</i>       | 0 | 0 | 0 | 0 |
| <i>Rungwecebus_kipunji</i>        | 0 | 0 | 0 | 0 |
| <i>Rupicapra_pyrenaica</i>        | 0 | 0 | 0 | 0 |
| <i>Rupicapra_rupicapra</i>        | 0 | 0 | 0 | 0 |
| <i>Rusa_alfredi</i>               | 0 | 0 | 0 | 0 |
| <i>Rusa_timorensis</i>            | 0 | 0 | 0 | 0 |
| <i>Rusa_unicolor</i>              | 0 | 0 | 0 | 0 |
| <i>Ruwenzorisorex_suncooides</i>  | 0 | 0 | 0 | 0 |
| <i>Saccolaimus_flaviventris</i>   | 0 | 0 | 0 | 0 |
| <i>Saccolaimus_saccolaimus</i>    | 0 | 0 | 0 | 0 |
| <i>Saccolaimus_bilineata</i>      | 0 | 0 | 0 | 0 |
| <i>Saccolaimus_canescens</i>      | 0 | 0 | 0 | 0 |
| <i>Saccolaimus_gymnura</i>        | 0 | 0 | 0 | 0 |
| <i>Saccolaimus_leptura</i>        | 0 | 0 | 0 | 0 |
| <i>Saccolaimus_campestris</i>     | 0 | 0 | 0 | 0 |
| <i>Saccolaimus_sp._50064</i>      | 0 | 0 | 0 | 0 |
| <i>Saguinus_bicolor</i>           | 0 | 0 | 0 | 0 |
| <i>Saguinus_fuscicollis</i>       | 0 | 0 | 0 | 0 |
| <i>Saguinus_geoffroyi</i>         | 0 | 0 | 0 | 0 |
| <i>Saguinus_graellsii</i>         | 0 | 0 | 0 | 0 |
| <i>Saguinus_imperator</i>         | 0 | 0 | 0 | 0 |
| <i>Saguinus_inustus</i>           | 0 | 0 | 0 | 0 |
| <i>Saguinus_labiatus</i>          | 0 | 0 | 0 | 0 |
| <i>Saguinus_leucopus</i>          | 0 | 0 | 0 | 0 |
| <i>Saguinus_martinsi</i>          | 0 | 0 | 0 | 0 |
| <i>Saguinus_melanoleucus</i>      | 0 | 0 | 0 | 0 |
| <i>Saguinus_midas</i>             | 0 | 0 | 0 | 0 |
| <i>Saguinus_mystax</i>            | 0 | 0 | 0 | 0 |

|                                |   |   |   |   |
|--------------------------------|---|---|---|---|
| <i>Saguinus_niger</i>          | 0 | 0 | 0 | 0 |
| <i>Saguinus_nigricollis</i>    | 0 | 0 | 0 | 0 |
| <i>Saguinus_oedipus</i>        | 0 | 0 | 0 | 0 |
| <i>Saguinus_tripartitus</i>    | 0 | 0 | 0 | 0 |
| <i>Saiga_tatarica</i>          | 0 | 0 | 0 | 0 |
| <i>Saimiri_boliviensis</i>     | 0 | 0 | 0 | 0 |
| <i>Saimiri_oerstedii</i>       | 0 | 0 | 0 | 0 |
| <i>Saimiri_sciureus</i>        | 0 | 0 | 0 | 0 |
| <i>Saimiri_ustus</i>           | 0 | 0 | 0 | 0 |
| <i>Salanoia_concolor</i>       | 0 | 0 | 0 | 0 |
| <i>Salpingotus_kozlovi</i>     | 0 | 0 | 0 | 0 |
| <i>Sauromys_petrophilus</i>    | 0 | 0 | 0 | 0 |
| <i>Scalopus_aquaticus</i>      | 0 | 0 | 0 | 0 |
| <i>Scapanus_latimanus</i>      | 0 | 0 | 0 | 0 |
| <i>Scapanus_orarius</i>        | 0 | 0 | 0 | 0 |
| <i>Scapanus_townsendii</i>     | 0 | 0 | 0 | 0 |
| <i>Scapteromys_aquaticus</i>   | 0 | 0 | 0 | 0 |
| <i>Scapteromys_tumidus</i>     | 0 | 0 | 0 | 0 |
| <i>Scaptochirus_moschatus</i>  | 0 | 0 | 0 | 0 |
| <i>Scaptonyx_fusicaudus</i>    | 0 | 0 | 0 | 0 |
| <i>Sciurillus_pusillus</i>     | 0 | 0 | 0 | 0 |
| <i>Sciurotamias_davidianus</i> | 0 | 0 | 0 | 0 |
| <i>Sciurus_aberti</i>          | 0 | 0 | 0 | 0 |
| <i>Sciurus_aestuans</i>        | 0 | 0 | 0 | 0 |
| <i>Sciurus_anomalus</i>        | 0 | 0 | 0 | 0 |
| <i>Sciurus_carolinensis</i>    | 0 | 0 | 0 | 0 |
| <i>Sciurus_granatensis</i>     | 0 | 0 | 0 | 0 |
| <i>Sciurus_griseus</i>         | 0 | 0 | 0 | 0 |
| <i>Sciurus_ignitus</i>         | 0 | 0 | 0 | 0 |
| <i>Sciurus_lis</i>             | 0 | 0 | 0 | 0 |
| <i>Sciurus_niger</i>           | 0 | 0 | 0 | 0 |
| <i>Sciurus_stramineus</i>      | 0 | 0 | 0 | 0 |
| <i>Sciurus_variegatoides</i>   | 0 | 0 | 0 | 0 |
| <i>Sciurus_vulgaris</i>        | 0 | 0 | 0 | 0 |
| <i>Scolomys_juruaense</i>      | 0 | 0 | 0 | 0 |
| <i>Scolomys_melanops</i>       | 0 | 0 | 0 | 0 |
| <i>Scolomys_ucayalensis</i>    | 0 | 0 | 0 | 0 |
| <i>Scotinomys_teguina</i>      | 0 | 0 | 0 | 0 |
| <i>Scotinomys_xerampelinus</i> | 0 | 0 | 0 | 0 |
| <i>Scotoecus_hirundo</i>       | 0 | 0 | 0 | 0 |
| <i>Scotomanes_ornatus</i>      | 0 | 0 | 0 | 0 |
| <i>Scotonycteris_zenkeri</i>   | 0 | 0 | 0 | 0 |
| <i>Scotophilus_borbonicus</i>  | 0 | 0 | 0 | 0 |
| <i>Scotophilus_dinganii</i>    | 0 | 0 | 0 | 0 |

|                                |   |   |   |   |
|--------------------------------|---|---|---|---|
| <i>Scotophilus_heathii</i>     | 0 | 0 | 0 | 0 |
| <i>Scotophilus_kuhlii</i>      | 0 | 0 | 0 | 0 |
| <i>Scotophilus_leucogaster</i> | 0 | 0 | 0 | 0 |
| <i>Scotophilus_nigrita</i>     | 0 | 0 | 0 | 0 |
| <i>Scotophilus_nux</i>         | 0 | 0 | 0 | 0 |
| <i>Scotophilus_robustus</i>    | 0 | 0 | 0 | 0 |
| <i>Scotophilus_viridis</i>     | 0 | 0 | 0 | 0 |
| <i>Scutisorex_somereni</i>     | 0 | 0 | 0 | 0 |
| <i>Sekeetamys_calurus</i>      | 0 | 0 | 0 | 0 |
| <i>Semnopithecus_entellus</i>  | 0 | 0 | 0 | 0 |
| <i>Semnopithecus_hector</i>    | 0 | 0 | 0 | 0 |
| <i>Setifer_setosus</i>         | 0 | 0 | 0 | 0 |
| <i>Sicista_betulina</i>        | 0 | 0 | 0 | 0 |
| <i>Sicista_concolor</i>        | 0 | 0 | 0 | 0 |
| <i>Sicista_kazbegica</i>       | 0 | 0 | 0 | 0 |
| <i>Sicista_tianshanica</i>     | 0 | 0 | 0 | 0 |
| <i>Sigmodon_alleni</i>         | 0 | 0 | 0 | 0 |
| <i>Sigmodon_alstoni</i>        | 0 | 0 | 0 | 0 |
| <i>Sigmodon_arizonae</i>       | 0 | 0 | 0 | 0 |
| <i>Sigmodon_fulviventer</i>    | 0 | 0 | 0 | 0 |
| <i>Sigmodon_hirsutus</i>       | 0 | 0 | 0 | 0 |
| <i>Sigmodon_hispidus</i>       | 0 | 0 | 0 | 0 |
| <i>Sigmodon_leucotis</i>       | 0 | 0 | 0 | 0 |
| <i>Sigmodon_mascotensis</i>    | 0 | 0 | 0 | 0 |
| <i>Sigmodon_ochrognathus</i>   | 0 | 0 | 0 | 0 |
| <i>Sigmodon_peruanus</i>       | 0 | 0 | 0 | 0 |
| <i>Sigmodon_toltecus</i>       | 0 | 0 | 0 | 0 |
| <i>Sigmodontomys_alfari</i>    | 0 | 0 | 0 | 0 |
| <i>Simias_concolor</i>         | 0 | 0 | 0 | 0 |
| <i>Solenodon_cubanus</i>       | 0 | 0 | 0 | 0 |
| <i>Solenodon_paradoxus</i>     | 0 | 0 | 0 | 0 |
| <i>Solomys_ponceleti</i>       | 0 | 0 | 0 | 0 |
| <i>Solomys_salebrosus</i>      | 0 | 0 | 0 | 0 |
| <i>Sooretamys_angouya</i>      | 0 | 0 | 0 | 0 |
| <i>Sorex_alpinus</i>           | 0 | 0 | 0 | 0 |
| <i>Sorex_antinorii</i>         | 0 | 0 | 0 | 0 |
| <i>Sorex_araneus</i>           | 0 | 0 | 0 | 0 |
| <i>Sorex_arcticus</i>          | 0 | 0 | 0 | 0 |
| <i>Sorex_arizonae</i>          | 0 | 0 | 0 | 0 |
| <i>Sorex_asper</i>             | 0 | 0 | 0 | 0 |
| <i>Sorex_bairdi</i>            | 0 | 0 | 0 | 0 |
| <i>Sorex_bedfordiae</i>        | 0 | 0 | 0 | 0 |
| <i>Sorex_bendirii</i>          | 0 | 0 | 0 | 0 |
| <i>Sorex_caecutiens</i>        | 0 | 0 | 0 | 0 |

|                             |   |   |   |   |
|-----------------------------|---|---|---|---|
| <i>Sorex_camtschatica</i>   | 0 | 0 | 0 | 0 |
| <i>Sorex_cinereus</i>       | 0 | 0 | 0 | 0 |
| <i>Sorex_coronatus</i>      | 0 | 0 | 0 | 0 |
| <i>Sorex_daphaenodon</i>    | 0 | 0 | 0 | 0 |
| <i>Sorex_dispar</i>         | 0 | 0 | 0 | 0 |
| <i>Sorex_excelsus</i>       | 0 | 0 | 0 | 0 |
| <i>Sorex_fumeus</i>         | 0 | 0 | 0 | 0 |
| <i>Sorex_gracillimus</i>    | 0 | 0 | 0 | 0 |
| <i>Sorex_granarius</i>      | 0 | 0 | 0 | 0 |
| <i>Sorex_haydeni</i>        | 0 | 0 | 0 | 0 |
| <i>Sorex_hosonoi</i>        | 0 | 0 | 0 | 0 |
| <i>Sorex_hoyi</i>           | 0 | 0 | 0 | 0 |
| <i>Sorex_hydrodromus</i>    | 0 | 0 | 0 | 0 |
| <i>Sorex_isodon</i>         | 0 | 0 | 0 | 0 |
| <i>Sorex_jacksoni</i>       | 0 | 0 | 0 | 0 |
| <i>Sorex_longirostris</i>   | 0 | 0 | 0 | 0 |
| <i>Sorex_maritimensis</i>   | 0 | 0 | 0 | 0 |
| <i>Sorex_minutissimus</i>   | 0 | 0 | 0 | 0 |
| <i>Sorex_minutus</i>        | 0 | 0 | 0 | 0 |
| <i>Sorex_mirabilis</i>      | 0 | 0 | 0 | 0 |
| <i>Sorex_monticolus</i>     | 0 | 0 | 0 | 0 |
| <i>Sorex_neomexicanus</i>   | 0 | 0 | 0 | 0 |
| <i>Sorex_ornatus</i>        | 0 | 0 | 0 | 0 |
| <i>Sorex_pacificus</i>      | 0 | 0 | 0 | 0 |
| <i>Sorex_palustris</i>      | 0 | 0 | 0 | 0 |
| <i>Sorex_portenkoi</i>      | 0 | 0 | 0 | 0 |
| <i>Sorex_preblei</i>        | 0 | 0 | 0 | 0 |
| <i>Sorex_raddei</i>         | 0 | 0 | 0 | 0 |
| <i>Sorex_roboratus</i>      | 0 | 0 | 0 | 0 |
| <i>Sorex_samniticus</i>     | 0 | 0 | 0 | 0 |
| <i>Sorex_satunini</i>       | 0 | 0 | 0 | 0 |
| <i>Sorex_saussurei</i>      | 0 | 0 | 0 | 0 |
| <i>Sorex_shinto</i>         | 0 | 0 | 0 | 0 |
| <i>Sorex_sonomae</i>        | 0 | 0 | 0 | 0 |
| <i>Sorex_tenellus</i>       | 0 | 0 | 0 | 0 |
| <i>Sorex_thompsoni</i>      | 0 | 0 | 0 | 0 |
| <i>Sorex_trowbridgii</i>    | 0 | 0 | 0 | 0 |
| <i>Sorex_tundrensis</i>     | 0 | 0 | 0 | 0 |
| <i>Sorex_ugyunak</i>        | 0 | 0 | 0 | 0 |
| <i>Sorex_unguiculatus</i>   | 0 | 0 | 0 | 0 |
| <i>Sorex_vagrans</i>        | 0 | 0 | 0 | 0 |
| <i>Sorex_volnuchini</i>     | 0 | 0 | 0 | 0 |
| <i>Soriculus_nigrescens</i> | 0 | 0 | 0 | 0 |
| <i>Sotalia_fluviatilis</i>  | 0 | 0 | 0 | 0 |

|                                      |   |   |   |   |
|--------------------------------------|---|---|---|---|
| <i>Sotalia_guianensis</i>            | 0 | 0 | 0 | 0 |
| <i>Sousa_chinensis</i>               | 0 | 0 | 0 | 0 |
| <i>Sousa_teuszii</i>                 | 0 | 0 | 0 | 0 |
| <i>Spalacopus_cyanus</i>             | 0 | 0 | 0 | 0 |
| <i>Spalax_arenarius</i>              | 0 | 0 | 0 | 0 |
| <i>Spalax_graecus</i>                | 0 | 0 | 0 | 0 |
| <i>Spalax_microphthalmus</i>         | 0 | 0 | 0 | 0 |
| <i>Spalax_zemni</i>                  | 0 | 0 | 0 | 0 |
| <i>Speothos_venaticus</i>            | 0 | 0 | 0 | 0 |
| <i>Spermophilopsis_leptodactylus</i> | 0 | 0 | 0 | 0 |
| <i>Spermophilus_alashanicus</i>      | 0 | 0 | 0 | 0 |
| <i>Spermophilus_citellus</i>         | 0 | 0 | 0 | 0 |
| <i>Spermophilus_dauricus</i>         | 0 | 0 | 0 | 0 |
| <i>Spermophilus_elegans</i>          | 0 | 0 | 0 | 0 |
| <i>Spermophilus_erythrogenys</i>     | 0 | 0 | 0 | 0 |
| <i>Spermophilus_fulvus</i>           | 0 | 0 | 0 | 0 |
| <i>Spermophilus_major</i>            | 0 | 0 | 0 | 0 |
| <i>Spermophilus_musicus</i>          | 0 | 0 | 0 | 0 |
| <i>Spermophilus_pallidicauda</i>     | 0 | 0 | 0 | 0 |
| <i>Spermophilus_pygmaeus</i>         | 0 | 0 | 0 | 0 |
| <i>Spermophilus_relictus</i>         | 0 | 0 | 0 | 0 |
| <i>Spermophilus_suslicus</i>         | 0 | 0 | 0 | 0 |
| <i>Spermophilus_xanthoprimum</i>     | 0 | 0 | 0 | 0 |
| <i>Sphaerias_blanfordi</i>           | 0 | 0 | 0 | 0 |
| <i>Sphaeronycteris_toxophyllum</i>   | 0 | 0 | 0 | 0 |
| <i>Spilogale_gracilis</i>            | 0 | 0 | 0 | 0 |
| <i>Spilogale_putorius</i>            | 0 | 0 | 0 | 0 |
| <i>Srilankamys_ohiensis</i>          | 0 | 0 | 0 | 0 |
| <i>Steatomys_parvus</i>              | 0 | 0 | 0 | 0 |
| <i>Stenella_attenuata</i>            | 0 | 0 | 0 | 0 |
| <i>Stenella_clymene</i>              | 0 | 0 | 0 | 0 |
| <i>Stenella_coeruleoalba</i>         | 0 | 0 | 0 | 0 |
| <i>Stenella_frontalis</i>            | 0 | 0 | 0 | 0 |
| <i>Stenella_longirostris</i>         | 0 | 0 | 0 | 0 |
| <i>Steno_bredanensis</i>             | 0 | 0 | 0 | 0 |
| <i>Stenocephalemys_albipes</i>       | 0 | 0 | 0 | 0 |
| <i>Stenocephalemys_albicaudata</i>   | 0 | 0 | 0 | 0 |
| <i>Stenocephalemys_griseicauda</i>   | 0 | 0 | 0 | 0 |
| <i>Stenoderma_rufum</i>              | 0 | 0 | 0 | 0 |
| <i>Stenonycteris_lanosus</i>         | 0 | 0 | 0 | 0 |
| <i>Stochomys_longicaudatus</i>       | 0 | 0 | 0 | 0 |
| <i>Sturnira_aratathomasi</i>         | 0 | 0 | 0 | 0 |
| <i>Sturnira_bidens</i>               | 0 | 0 | 0 | 0 |
| <i>Sturnira_bogotensis</i>           | 0 | 0 | 0 | 0 |



|                                    |   |   |   |   |
|------------------------------------|---|---|---|---|
| <i>Sturnira_erythromos</i>         | 0 | 0 | 0 | 0 |
| <i>Sturnira_lilium</i>             | 0 | 0 | 0 | 0 |
| <i>Sturnira_ludovici</i>           | 0 | 0 | 0 | 0 |
| <i>Sturnira_luisi</i>              | 0 | 0 | 0 | 0 |
| <i>Sturnira_magna</i>              | 0 | 0 | 0 | 0 |
| <i>Sturnira_mordax</i>             | 0 | 0 | 0 | 0 |
| <i>Sturnira_nana</i>               | 0 | 0 | 0 | 0 |
| <i>Sturnira_oporaphilum</i>        | 0 | 0 | 0 | 0 |
| <i>Sturnira_tildae</i>             | 0 | 0 | 0 | 0 |
| <i>Stylodipus_andrewsi</i>         | 0 | 0 | 0 | 0 |
| <i>Suncus_dayi</i>                 | 0 | 0 | 0 | 0 |
| <i>Suncus_etruscus</i>             | 0 | 0 | 0 | 0 |
| <i>Suncus_infinitesimus</i>        | 0 | 0 | 0 | 0 |
| <i>Suncus_lixus</i>                | 0 | 0 | 0 | 0 |
| <i>Suncus_madagascariensis</i>     | 0 | 0 | 0 | 0 |
| <i>Suncus_megalura</i>             | 0 | 0 | 0 | 0 |
| <i>Suncus_montanus</i>             | 0 | 0 | 0 | 0 |
| <i>Suncus_murinus</i>              | 0 | 0 | 0 | 0 |
| <i>Suncus_remyi</i>                | 0 | 0 | 0 | 0 |
| <i>Suncus_stoliczkanus</i>         | 0 | 0 | 0 | 0 |
| <i>Suncus_varilla</i>              | 0 | 0 | 0 | 0 |
| <i>Sundamys_muelleri</i>           | 0 | 0 | 0 | 0 |
| <i>Sundasciurus_brookei</i>        | 0 | 0 | 0 | 0 |
| <i>Sundasciurus_lowii</i>          | 0 | 0 | 0 | 0 |
| <i>Sundasciurus_mindanensis</i>    | 0 | 0 | 0 | 0 |
| <i>Sundasciurus_philippinensis</i> | 0 | 0 | 0 | 0 |
| <i>Suricata_suricata</i>           | 0 | 0 | 0 | 0 |
| <i>Sus_barbatus</i>                | 0 | 0 | 0 | 0 |
| <i>Sus_bucculentus</i>             | 0 | 0 | 0 | 0 |
| <i>Sus_cebifrons</i>               | 0 | 0 | 0 | 0 |
| <i>Sus_celebensis</i>              | 0 | 0 | 0 | 0 |
| <i>Sus_philippensis</i>            | 0 | 0 | 0 | 0 |
| <i>Sus_salvanus</i>                | 0 | 0 | 0 | 0 |
| <i>Sus_scrofa</i>                  | 0 | 0 | 0 | 0 |
| <i>Sus_verrucosus</i>              | 0 | 0 | 0 | 0 |
| <i>Syconycteris_australis</i>      | 0 | 0 | 0 | 0 |
| <i>Sylvicapra_grimmia</i>          | 0 | 0 | 0 | 0 |
| <i>Sylvilagus_aquaticus</i>        | 0 | 0 | 0 | 0 |
| <i>Sylvilagus_audubonii</i>        | 0 | 0 | 0 | 0 |
| <i>Sylvilagus_bachmani</i>         | 0 | 0 | 0 | 0 |
| <i>Sylvilagus_brasiliensis</i>     | 0 | 0 | 0 | 0 |
| <i>Sylvilagus_floridanus</i>       | 0 | 0 | 0 | 0 |
| <i>Sylvilagus_nuttallii</i>        | 0 | 0 | 0 | 0 |
| <i>Sylvilagus_obscurus</i>         | 0 | 0 | 0 | 0 |

|                                  |   |   |   |   |
|----------------------------------|---|---|---|---|
| <i>Sylvilagus_palustris</i>      | 0 | 0 | 0 | 0 |
| <i>Sylvilagus_robustus</i>       | 0 | 0 | 0 | 0 |
| <i>Sylvilagus_transitionalis</i> | 0 | 0 | 0 | 0 |
| <i>Sylvisorex_granti</i>         | 0 | 0 | 0 | 0 |
| <i>Sylvisorex_howellii</i>       | 0 | 0 | 0 | 0 |
| <i>Sylvisorex_johnstoni</i>      | 0 | 0 | 0 | 0 |
| <i>Sylvisorex_lunaris</i>        | 0 | 0 | 0 | 0 |
| <i>Sylvisorex_ollula</i>         | 0 | 0 | 0 | 0 |
| <i>Sylvisorex_vulcanorum</i>     | 0 | 0 | 0 | 0 |
| <i>Symphalangus_syndactylus</i>  | 0 | 0 | 0 | 0 |
| <i>Synaptomys_borealis</i>       | 0 | 0 | 0 | 0 |
| <i>Synaptomys_cooperi</i>        | 0 | 0 | 0 | 0 |
| <i>Syncerus_caffer</i>           | 0 | 0 | 0 | 0 |
| <i>Syntheosciurus_brochus</i>    | 0 | 0 | 0 | 0 |
| <i>Tachyoryctes_splendens</i>    | 0 | 0 | 0 | 0 |
| <i>Tadarida_aegyptiaca</i>       | 0 | 0 | 0 | 0 |
| <i>Tadarida_brasiliensis</i>     | 0 | 0 | 0 | 0 |
| <i>Tadarida_fulminans</i>        | 0 | 0 | 0 | 0 |
| <i>Tadarida_insignis</i>         | 0 | 0 | 0 | 0 |
| <i>Tadarida_teniotis</i>         | 0 | 0 | 0 | 0 |
| <i>Talpa_altaica</i>             | 0 | 0 | 0 | 0 |
| <i>Talpa_caeca</i>               | 0 | 0 | 0 | 0 |
| <i>Talpa_caucasica</i>           | 0 | 0 | 0 | 0 |
| <i>Talpa_europaea</i>            | 0 | 0 | 0 | 0 |
| <i>Talpa_levantis</i>            | 0 | 0 | 0 | 0 |
| <i>Talpa_occidentalis</i>        | 0 | 0 | 0 | 0 |
| <i>Talpa_romana</i>              | 0 | 0 | 0 | 0 |
| <i>Talpa_stankovici</i>          | 0 | 0 | 0 | 0 |
| <i>Tamandua_mexicana</i>         | 0 | 0 | 0 | 0 |
| <i>Tamandua_tetradactyla</i>     | 0 | 0 | 0 | 0 |
| <i>Tamias_alpinus</i>            | 0 | 0 | 0 | 0 |
| <i>Tamias_amoenus</i>            | 0 | 0 | 0 | 0 |
| <i>Tamias_bulleri</i>            | 0 | 0 | 0 | 0 |
| <i>Tamias_canipes</i>            | 0 | 0 | 0 | 0 |
| <i>Tamias_cinereicollis</i>      | 0 | 0 | 0 | 0 |
| <i>Tamias_dorsalis</i>           | 0 | 0 | 0 | 0 |
| <i>Tamias_durangae</i>           | 0 | 0 | 0 | 0 |
| <i>Tamias_merriami</i>           | 0 | 0 | 0 | 0 |
| <i>Tamias_minimus</i>            | 0 | 0 | 0 | 0 |
| <i>Tamias_obscurus</i>           | 0 | 0 | 0 | 0 |
| <i>Tamias_ochrogenys</i>         | 0 | 0 | 0 | 0 |
| <i>Tamias_palmeri</i>            | 0 | 0 | 0 | 0 |
| <i>Tamias_panamintinus</i>       | 0 | 0 | 0 | 0 |
| <i>Tamias_quadrimaculatus</i>    | 0 | 0 | 0 | 0 |

|                                |   |   |   |   |
|--------------------------------|---|---|---|---|
| <i>Tamias_quadrivittatus</i>   | 0 | 0 | 0 | 0 |
| <i>Tamias_ruficaudus</i>       | 0 | 0 | 0 | 0 |
| <i>Tamias_rufus</i>            | 0 | 0 | 0 | 0 |
| <i>Tamias_senex</i>            | 0 | 0 | 0 | 0 |
| <i>Tamias_sibiricus</i>        | 0 | 0 | 0 | 0 |
| <i>Tamias_siskiyou</i>         | 0 | 0 | 0 | 0 |
| <i>Tamias_sonomae</i>          | 0 | 0 | 0 | 0 |
| <i>Tamias_speciosus</i>        | 0 | 0 | 0 | 0 |
| <i>Tamias_striatus</i>         | 0 | 0 | 0 | 0 |
| <i>Tamias_townsendii</i>       | 0 | 0 | 0 | 0 |
| <i>Tamias_umbrinus</i>         | 0 | 0 | 0 | 0 |
| <i>Tamiasciurus_douglasii</i>  | 0 | 0 | 0 | 0 |
| <i>Tamiasciurus_hudsonicus</i> | 0 | 0 | 0 | 0 |
| <i>Tamiasciurus_mearnsi</i>    | 0 | 0 | 0 | 0 |
| <i>Tamiops_maritimus</i>       | 0 | 0 | 0 | 0 |
| <i>Tamiops_mcclellandii</i>    | 0 | 0 | 0 | 0 |
| <i>Tamiops_rodolphii</i>       | 0 | 0 | 0 | 0 |
| <i>Tamiops_swinhoei</i>        | 0 | 0 | 0 | 0 |
| <i>Taphozous_australis</i>     | 0 | 0 | 0 | 0 |
| <i>Taphozous_georgianus</i>    | 0 | 0 | 0 | 0 |
| <i>Taphozous_hilli</i>         | 0 | 0 | 0 | 0 |
| <i>Taphozous_longimanus</i>    | 0 | 0 | 0 | 0 |
| <i>Taphozous_mauritanus</i>    | 0 | 0 | 0 | 0 |
| <i>Taphozous_melanopogon</i>   | 0 | 0 | 0 | 0 |
| <i>Taphozous_nudiventris</i>   | 0 | 0 | 0 | 0 |
| <i>Tapirus_bairdii</i>         | 0 | 0 | 0 | 0 |
| <i>Tapirus_indicus</i>         | 0 | 0 | 0 | 0 |
| <i>Tapirus_pinchaque</i>       | 0 | 0 | 0 | 0 |
| <i>Tapirus_terrestris</i>      | 0 | 0 | 0 | 0 |
| <i>Tarsius_bancanus</i>        | 0 | 0 | 0 | 0 |
| <i>Tarsius_dentatus</i>        | 0 | 0 | 0 | 0 |
| <i>Tarsius_lariang</i>         | 0 | 0 | 0 | 0 |
| <i>Tarsius_sangirensis</i>     | 0 | 0 | 0 | 0 |
| <i>Tarsius_syrichta</i>        | 0 | 0 | 0 | 0 |
| <i>Tarsius_tarsier</i>         | 0 | 0 | 0 | 0 |
| <i>Tarsius_wallacei</i>        | 0 | 0 | 0 | 0 |
| <i>Tarsomys_apoensis</i>       | 0 | 0 | 0 | 0 |
| <i>Tasmacetus_shepherdi</i>    | 0 | 0 | 0 | 0 |
| <i>Tatera_sp._KE102</i>        | 0 | 0 | 0 | 0 |
| <i>Tatera_sp._KIK1704</i>      | 0 | 0 | 0 | 0 |
| <i>Tatera_vicina</i>           | 0 | 0 | 0 | 0 |
| <i>Taterillus_arenarius</i>    | 0 | 0 | 0 | 0 |
| <i>Taterillus_emini</i>        | 0 | 0 | 0 | 0 |
| <i>Taterillus_gracilis</i>     | 0 | 0 | 0 | 0 |

|                                |   |   |   |   |
|--------------------------------|---|---|---|---|
| <i>Taterillus_pygargus</i>     | 0 | 0 | 0 | 0 |
| <i>Taterillus_sp._PC2002</i>   | 0 | 0 | 0 | 0 |
| <i>Taurotragus_derbianus</i>   | 0 | 0 | 0 | 0 |
| <i>Taxidea_taxus</i>           | 0 | 0 | 0 | 0 |
| <i>Tayassu_pecari</i>          | 0 | 0 | 0 | 0 |
| <i>Tenrec_ecaudatus</i>        | 0 | 0 | 0 | 0 |
| <i>Tetracerus_quadricornis</i> | 0 | 0 | 0 | 0 |
| <i>Thallomys_loringi</i>       | 0 | 0 | 0 | 0 |
| <i>Thallomys_nigricauda</i>    | 0 | 0 | 0 | 0 |
| <i>Thallomys_paedulcus</i>     | 0 | 0 | 0 | 0 |
| <i>Thalpomys_cerradensis</i>   | 0 | 0 | 0 | 0 |
| <i>Thalpomys_lasiotis</i>      | 0 | 0 | 0 | 0 |
| <i>Thaptomys_nigrita</i>       | 0 | 0 | 0 | 0 |
| <i>Theropithecus_gelada</i>    | 0 | 0 | 0 | 0 |
| <i>Thomasomys_aureus</i>       | 0 | 0 | 0 | 0 |
| <i>Thomasomys_baeops</i>       | 0 | 0 | 0 | 0 |
| <i>Thomasomys_caudivarius</i>  | 0 | 0 | 0 | 0 |
| <i>Thomasomys_cinnameus</i>    | 0 | 0 | 0 | 0 |
| <i>Thomasomys_daphne</i>       | 0 | 0 | 0 | 0 |
| <i>Thomasomys_erro</i>         | 0 | 0 | 0 | 0 |
| <i>Thomasomys_gracilis</i>     | 0 | 0 | 0 | 0 |
| <i>Thomasomys_ladewi</i>       | 0 | 0 | 0 | 0 |
| <i>Thomasomys_notatus</i>      | 0 | 0 | 0 | 0 |
| <i>Thomasomys_oreas</i>        | 0 | 0 | 0 | 0 |
| <i>Thomomys_bottae</i>         | 0 | 0 | 0 | 0 |
| <i>Thomomys_bulbivorus</i>     | 0 | 0 | 0 | 0 |
| <i>Thomomys_mazama</i>         | 0 | 0 | 0 | 0 |
| <i>Thomomys_monticola</i>      | 0 | 0 | 0 | 0 |
| <i>Thomomys_talpoides</i>      | 0 | 0 | 0 | 0 |
| <i>Thomomys_townsendii</i>     | 0 | 0 | 0 | 0 |
| <i>Thomomys_umbrinus</i>       | 0 | 0 | 0 | 0 |
| <i>Thoopterus_nigrescens</i>   | 0 | 0 | 0 | 0 |
| <i>Thrichomys_apereoides</i>   | 0 | 0 | 0 | 0 |
| <i>Thrichomys_inermis</i>      | 0 | 0 | 0 | 0 |
| <i>Thryonomys_gregorianus</i>  | 0 | 0 | 0 | 0 |
| <i>Thryonomys_swinderianus</i> | 0 | 0 | 0 | 0 |
| <i>Thyroptera_discifera</i>    | 0 | 0 | 0 | 0 |
| <i>Thyroptera_tricolor</i>     | 0 | 0 | 0 | 0 |
| <i>Tokudaia_muenninki</i>      | 0 | 0 | 0 | 0 |
| <i>Tokudaia_osimensis</i>      | 0 | 0 | 0 | 0 |
| <i>Tolypeutes_matacus</i>      | 0 | 0 | 0 | 0 |
| <i>Tolypeutes_tricinctus</i>   | 0 | 0 | 0 | 0 |
| <i>Tonatia_bidens</i>          | 0 | 0 | 0 | 0 |
| <i>Tonatia_saurophila</i>      | 0 | 0 | 0 | 0 |

|                                     |   |   |   |   |
|-------------------------------------|---|---|---|---|
| <i>Trachops_cirrhosus</i>           | 0 | 0 | 0 | 0 |
| <i>Trachypithecus_auratus</i>       | 0 | 0 | 0 | 0 |
| <i>Trachypithecus_barbei</i>        | 0 | 0 | 0 | 0 |
| <i>Trachypithecus_cristatus</i>     | 0 | 0 | 0 | 0 |
| <i>Trachypithecus_delacouri</i>     | 0 | 0 | 0 | 0 |
| <i>Trachypithecus_francoisi</i>     | 0 | 0 | 0 | 0 |
| <i>Trachypithecus_geei</i>          | 0 | 0 | 0 | 0 |
| <i>Trachypithecus_germaini</i>      | 0 | 0 | 0 | 0 |
| <i>Trachypithecus_hatinhensis</i>   | 0 | 0 | 0 | 0 |
| <i>Trachypithecus_johnii</i>        | 0 | 0 | 0 | 0 |
| <i>Trachypithecus_laotum</i>        | 0 | 0 | 0 | 0 |
| <i>Trachypithecus_obscurus</i>      | 0 | 0 | 0 | 0 |
| <i>Trachypithecus_phayrei</i>       | 0 | 0 | 0 | 0 |
| <i>Trachypithecus_pileatus</i>      | 0 | 0 | 0 | 0 |
| <i>Trachypithecus_poliocephalus</i> | 0 | 0 | 0 | 0 |
| <i>Trachypithecus_yetulus</i>       | 0 | 0 | 0 | 0 |
| <i>Tragelaphus_angasii</i>          | 0 | 0 | 0 | 0 |
| <i>Tragelaphus_buxtoni</i>          | 0 | 0 | 0 | 0 |
| <i>Tragelaphus_eurycerus</i>        | 0 | 0 | 0 | 0 |
| <i>Tragelaphus_imberbis</i>         | 0 | 0 | 0 | 0 |
| <i>Tragelaphus_oryx</i>             | 0 | 0 | 0 | 0 |
| <i>Tragelaphus_scriptus</i>         | 0 | 0 | 0 | 0 |
| <i>Tragelaphus_spekii</i>           | 0 | 0 | 0 | 0 |
| <i>Tragelaphus_strepsiceros</i>     | 0 | 0 | 0 | 0 |
| <i>Tragulus_javanicus</i>           | 0 | 0 | 0 | 0 |
| <i>Tragulus_napu</i>                | 0 | 0 | 0 | 0 |
| <i>Transandinomys_bolivaris</i>     | 0 | 0 | 0 | 0 |
| <i>Transandinomys_talamancae</i>    | 0 | 0 | 0 | 0 |
| <i>Tremarctos_ornatus</i>           | 0 | 0 | 0 | 0 |
| <i>Triaenops_auritus</i>            | 0 | 0 | 0 | 0 |
| <i>Triaenops_furculus</i>           | 0 | 0 | 0 | 0 |
| <i>Triaenops_persicus</i>           | 0 | 0 | 0 | 0 |
| <i>Triaenops_rufus</i>              | 0 | 0 | 0 | 0 |
| <i>Trichechus_inunguis</i>          | 0 | 0 | 0 | 0 |
| <i>Trichechus_manatus</i>           | 0 | 0 | 0 | 0 |
| <i>Trichechus_senegalensis</i>      | 0 | 0 | 0 | 0 |
| <i>Trichys_fasciculata</i>          | 0 | 0 | 0 | 0 |
| <i>Trinomys_albispinus</i>          | 0 | 0 | 0 | 0 |
| <i>Trinomys_dimidiatus</i>          | 0 | 0 | 0 | 0 |
| <i>Trinomys_eliasi</i>              | 0 | 0 | 0 | 0 |
| <i>Trinomys_gratiosus</i>           | 0 | 0 | 0 | 0 |
| <i>Trinomys_iheringi</i>            | 0 | 0 | 0 | 0 |
| <i>Trinomys_paratus</i>             | 0 | 0 | 0 | 0 |
| <i>Trinomys_setosus</i>             | 0 | 0 | 0 | 0 |

|                                 |   |   |   |   |
|---------------------------------|---|---|---|---|
| <i>Trinomys_yonenagae</i>       | 0 | 0 | 0 | 0 |
| <i>Trogopterus_xanthipes</i>    | 0 | 0 | 0 | 0 |
| <i>Tscherskia_triton</i>        | 0 | 0 | 0 | 0 |
| <i>Tupaia_belangeri</i>         | 0 | 0 | 0 | 0 |
| <i>Tupaia_chrysogaster</i>      | 0 | 0 | 0 | 0 |
| <i>Tupaia_dorsalis</i>          | 0 | 0 | 0 | 0 |
| <i>Tupaia_glis</i>              | 0 | 0 | 0 | 0 |
| <i>Tupaia_gracilis</i>          | 0 | 0 | 0 | 0 |
| <i>Tupaia_javanica</i>          | 0 | 0 | 0 | 0 |
| <i>Tupaia_longipes</i>          | 0 | 0 | 0 | 0 |
| <i>Tupaia_minor</i>             | 0 | 0 | 0 | 0 |
| <i>Tupaia_moellendorffi</i>     | 0 | 0 | 0 | 0 |
| <i>Tupaia_montana</i>           | 0 | 0 | 0 | 0 |
| <i>Tupaia_nicobarica</i>        | 0 | 0 | 0 | 0 |
| <i>Tupaia_palawanensis</i>      | 0 | 0 | 0 | 0 |
| <i>Tupaia_picta</i>             | 0 | 0 | 0 | 0 |
| <i>Tupaia_splendidula</i>       | 0 | 0 | 0 | 0 |
| <i>Tupaia_tana</i>              | 0 | 0 | 0 | 0 |
| <i>Tursiops_aduncus</i>         | 0 | 0 | 0 | 0 |
| <i>Tursiops_truncatus</i>       | 0 | 0 | 0 | 0 |
| <i>Tylomys_nudicaudus</i>       | 0 | 0 | 0 | 0 |
| <i>Tylomys_watsoni</i>          | 0 | 0 | 0 | 0 |
| <i>Tylonycteris_pachypus</i>    | 0 | 0 | 0 | 0 |
| <i>Tylonycteris_robustula</i>   | 0 | 0 | 0 | 0 |
| <i>Tympanoctomys_barrerae</i>   | 0 | 0 | 0 | 0 |
| <i>Typhlomys_cinereus</i>       | 0 | 0 | 0 | 0 |
| <i>Uncia_uncia</i>              | 0 | 0 | 0 | 0 |
| <i>Uranomys_ruddi</i>           | 0 | 0 | 0 | 0 |
| <i>Urocitellus_armatus</i>      | 0 | 0 | 0 | 0 |
| <i>Urocitellus_beldingi</i>     | 0 | 0 | 0 | 0 |
| <i>Urocitellus_brunneus</i>     | 0 | 0 | 0 | 0 |
| <i>Urocitellus_columbianus</i>  | 0 | 0 | 0 | 0 |
| <i>Urocitellus_parryii</i>      | 0 | 0 | 0 | 0 |
| <i>Urocitellus_richardsonii</i> | 0 | 0 | 0 | 0 |
| <i>Urocitellus_townsendi</i>    | 0 | 0 | 0 | 0 |
| <i>Urocitellus_undulatus</i>    | 0 | 0 | 0 | 0 |
| <i>Urocitellus_washingtoni</i>  | 0 | 0 | 0 | 0 |
| <i>Urocyon_cinereoargenteus</i> | 0 | 0 | 0 | 0 |
| <i>Urocyon_littoralis</i>       | 0 | 0 | 0 | 0 |
| <i>Uroderma_bilobatum</i>       | 0 | 0 | 0 | 0 |
| <i>Uroderma_magnirostrum</i>    | 0 | 0 | 0 | 0 |
| <i>Urogale_everetti</i>         | 0 | 0 | 0 | 0 |
| <i>Uromys_anak</i>              | 0 | 0 | 0 | 0 |
| <i>Uromys_caudimaculatus</i>    | 0 | 0 | 0 | 0 |

|                               |   |   |   |   |
|-------------------------------|---|---|---|---|
| <i>Uromys_hadrourus</i>       | 0 | 0 | 0 | 0 |
| <i>Uropsilus_gracilis</i>     | 0 | 0 | 0 | 0 |
| <i>Uropsilus_soricipes</i>    | 0 | 0 | 0 | 0 |
| <i>Urotrichus_talpoides</i>   | 0 | 0 | 0 | 0 |
| <i>Ursus_americanus</i>       | 0 | 0 | 0 | 0 |
| <i>Ursus_arctos</i>           | 0 | 0 | 0 | 0 |
| <i>Ursus_deningeri</i>        | 0 | 0 | 0 | 0 |
| <i>Ursus_ingressus</i>        | 0 | 0 | 0 | 0 |
| <i>Ursus_maritimus</i>        | 0 | 0 | 0 | 0 |
| <i>Ursus_spelaeus</i>         | 0 | 0 | 0 | 0 |
| <i>Ursus_thibetanus</i>       | 0 | 0 | 0 | 0 |
| <i>Vampyressa_bidens</i>      | 0 | 0 | 0 | 0 |
| <i>Vampyressa_brocki</i>      | 0 | 0 | 0 | 0 |
| <i>Vampyressa_melissa</i>     | 0 | 0 | 0 | 0 |
| <i>Vampyressa_nymphaea</i>    | 0 | 0 | 0 | 0 |
| <i>Vampyressa_pusilla</i>     | 0 | 0 | 0 | 0 |
| <i>Vampyressa_thyone</i>      | 0 | 0 | 0 | 0 |
| <i>Vampyroides_caraccioli</i> | 0 | 0 | 0 | 0 |
| <i>Vampyrum_spectrum</i>      | 0 | 0 | 0 | 0 |
| <i>Varecia_rubra</i>          | 0 | 0 | 0 | 0 |
| <i>Varecia_variegata</i>      | 0 | 0 | 0 | 0 |
| <i>Vespertilio_murinus</i>    | 0 | 0 | 0 | 0 |
| <i>Vespertilio_sinensis</i>   | 0 | 0 | 0 | 0 |
| <i>Vicugna_pacos</i>          | 0 | 0 | 0 | 0 |
| <i>Vicugna_vicugna</i>        | 0 | 0 | 0 | 0 |
| <i>Viverra_megaspila</i>      | 0 | 0 | 0 | 0 |
| <i>Viverra_tangalunga</i>     | 0 | 0 | 0 | 0 |
| <i>Viverra_zibetha</i>        | 0 | 0 | 0 | 0 |
| <i>Viverricula_indica</i>     | 0 | 0 | 0 | 0 |
| <i>Volemys_millicens</i>      | 0 | 0 | 0 | 0 |
| <i>Volemys_musseri</i>        | 0 | 0 | 0 | 0 |
| <i>Vormela_peregrusna</i>     | 0 | 0 | 0 | 0 |
| <i>Vulpes_cana</i>            | 0 | 0 | 0 | 0 |
| <i>Vulpes_chama</i>           | 0 | 0 | 0 | 0 |
| <i>Vulpes_corsac</i>          | 0 | 0 | 0 | 0 |
| <i>Vulpes_ferrilata</i>       | 0 | 0 | 0 | 0 |
| <i>Vulpes_lagopus</i>         | 0 | 0 | 0 | 0 |
| <i>Vulpes_macrotis</i>        | 0 | 0 | 0 | 0 |
| <i>Vulpes_rueppellii</i>      | 0 | 0 | 0 | 0 |
| <i>Vulpes_velox</i>           | 0 | 0 | 0 | 0 |
| <i>Vulpes_vulpes</i>          | 0 | 0 | 0 | 0 |
| <i>Vulpes_zerda</i>           | 0 | 0 | 0 | 0 |
| <i>Wiedomys_pyrrhorhinos</i>  | 0 | 0 | 0 | 0 |
| <i>Xenomys_nelsoni</i>        | 0 | 0 | 0 | 0 |

|                                      |   |   |   |   |
|--------------------------------------|---|---|---|---|
| <i>Xeromys_myoides</i>               | 0 | 0 | 0 | 0 |
| <i>Xerospermophilus_mohavensis</i>   | 0 | 0 | 0 | 0 |
| <i>Xerospermophilus_perotensis</i>   | 0 | 0 | 0 | 0 |
| <i>Xerospermophilus_spilosoma</i>    | 0 | 0 | 0 | 0 |
| <i>Xerospermophilus_tereticaudus</i> | 0 | 0 | 0 | 0 |
| <i>Xerus_erythropus</i>              | 0 | 0 | 0 | 0 |
| <i>Xerus_inauris</i>                 | 0 | 0 | 0 | 0 |
| <i>Xerus_princeps</i>                | 0 | 0 | 0 | 0 |
| <i>Xerus_rutilus</i>                 | 0 | 0 | 0 | 0 |
| <i>Zaedyus_pichiy</i>                | 0 | 0 | 0 | 0 |
| <i>Zalophus_californianus</i>        | 0 | 0 | 0 | 0 |
| <i>Zalophus_japonicus</i>            | 0 | 0 | 0 | 0 |
| <i>Zalophus_wollebaeki</i>           | 0 | 0 | 0 | 0 |
| <i>Zapus_hudsonius</i>               | 0 | 0 | 0 | 0 |
| <i>Zapus_princeps</i>                | 0 | 0 | 0 | 0 |
| <i>Zapus_trinotatus</i>              | 0 | 0 | 0 | 0 |
| <i>Zelotomys_hildegardeae</i>        | 0 | 0 | 0 | 0 |
| <i>Ziphius_cavirostris</i>           | 0 | 0 | 0 | 0 |
| <i>Zygodontomys_brevicauda</i>       | 0 | 0 | 0 | 0 |
| <i>Zygodontomys_cherriei</i>         | 0 | 0 | 0 | 0 |
| <i>Zygozomys_trichopus</i>           | 0 | 0 | 0 | 0 |
| <i>Zyzomys_argurus</i>               | 0 | 0 | 0 | 0 |
| <i>Zyzomys_maini</i>                 | 0 | 0 | 0 | 0 |
| <i>Zyzomys_palatilis</i>             | 0 | 0 | 0 | 0 |
| <i>Zyzomys_pedunculatus</i>          | 0 | 0 | 0 | 0 |
| <i>Zyzomys_woodwardi</i>             | 0 | 0 | 0 | 0 |
| <b>Lepidosauromorpha</b>             |   |   |   |   |
| <i>Ablepharus_budaki</i>             | 1 | 0 | 0 | 0 |
| <i>Ablepharus_chernovi</i>           | 1 | 0 | 0 | 0 |
| <i>Ablepharus_kitaibelii</i>         | 1 | 0 | 0 | 0 |
| <i>Ablepharus_pannonicus</i>         | 1 | 0 | 0 | 0 |
| <i>Abronia_anzuetoi</i>              | 0 | 0 | 0 | 0 |
| <i>Abronia_aurita</i>                | 0 | 0 | 0 | 0 |
| <i>Abronia_campbelli</i>             | 0 | 0 | 0 | 0 |
| <i>Abronia_chiszari</i>              | 0 | 0 | 0 | 0 |
| <i>Abronia_fimbriata</i>             | 0 | 0 | 0 | 0 |
| <i>Abronia_frosti</i>                | 0 | 0 | 0 | 0 |
| <i>Abronia_graminea</i>              | 0 | 0 | 0 | 0 |
| <i>Abronia_lythrochila</i>           | 0 | 0 | 0 | 0 |
| <i>Abronia_matudai</i>               | 0 | 0 | 0 | 0 |
| <i>Abronia_mixteca</i>               | 0 | 0 | 0 | 0 |
| <i>Abronia_oaxacae</i>               | 0 | 0 | 0 | 0 |
| <i>Abronia_ornelasi</i>              | 0 | 0 | 0 | 0 |
| <i>Acalyptophis_peronii</i>          | 0 | 0 | 0 | 0 |



|                                         |   |   |   |   |
|-----------------------------------------|---|---|---|---|
| <i>Acanthocercus_atricollis</i>         | 1 | 0 | 0 | 0 |
| <i>Acanthodactylus_aureus</i>           | 1 | 0 | 0 | 0 |
| <i>Acanthodactylus_beershebensis</i>    | 1 | 0 | 0 | 0 |
| <i>Acanthodactylus_blanci</i>           | 1 | 0 | 0 | 0 |
| <i>Acanthodactylus_boskianus</i>        | 1 | 0 | 0 | 0 |
| <i>Acanthodactylus_busacki</i>          | 1 | 0 | 0 | 0 |
| <i>Acanthodactylus_cantoris</i>         | 1 | 0 | 0 | 0 |
| <i>Acanthodactylus_erythrurus</i>       | 1 | 0 | 0 | 0 |
| <i>Acanthodactylus_gongrorhynchatus</i> | 1 | 0 | 0 | 0 |
| <i>Acanthodactylus_longipes</i>         | 1 | 0 | 0 | 0 |
| <i>Acanthodactylus_maculatus</i>        | 1 | 0 | 0 | 0 |
| <i>Acanthodactylus_masirae</i>          | 1 | 0 | 0 | 0 |
| <i>Acanthodactylus_opheodurus</i>       | 1 | 0 | 0 | 0 |
| <i>Acanthodactylus_orientalis</i>       | 1 | 0 | 0 | 0 |
| <i>Acanthodactylus_pardalis</i>         | 1 | 0 | 0 | 0 |
| <i>Acanthodactylus_schmidti</i>         | 1 | 0 | 0 | 0 |
| <i>Acanthodactylus_schreiberi</i>       | 1 | 0 | 0 | 0 |
| <i>Acanthodactylus_scutellatus</i>      | 1 | 0 | 0 | 0 |
| <i>Acanthodactylus_tristrami</i>        | 1 | 0 | 0 | 0 |
| <i>Acanthophis_antarcticus</i>          | 0 | 0 | 0 | 0 |
| <i>Acanthophis_cf._laevis</i>           | - | 0 | 0 | 0 |
| <i>Acanthophis_cf._rugosus</i>          | - | 0 | 0 | 0 |
| <i>Acanthophis_praelongus</i>           | 0 | 0 | 0 | 0 |
| <i>Acanthophis_rugosus</i>              | 0 | 0 | 0 | 0 |
| <i>Acanthosaura_armata</i>              | 1 | 0 | 0 | 0 |
| <i>Acanthosaura_capra</i>               | 1 | 0 | 0 | 0 |
| <i>Acanthosaura_crucigera</i>           | 1 | 0 | 0 | 0 |
| <i>Acanthosaura_lepidogaster</i>        | 1 | 0 | 0 | 0 |
| <i>Achalinus_meiguensis</i>             | 1 | 0 | 0 | 0 |
| <i>Achalinus_rufescens</i>              | 1 | 0 | 0 | 0 |
| <i>Acontias_breviceps</i>               | 0 | 0 | 0 | 0 |
| <i>Acontias_gariepensis</i>             | - | 0 | 0 | 0 |
| <i>Acontias_gracilicauda</i>            | 0 | 0 | 0 | 0 |
| <i>Acontias_kgalagadi</i>               | - | 0 | 0 | 0 |
| <i>Acontias_lineatus</i>                | - | 0 | 0 | 0 |
| <i>Acontias_litoralis</i>               | - | 0 | 0 | 0 |
| <i>Acontias_meleagris</i>               | 0 | 0 | 0 | 0 |
| <i>Acontias_percivali</i>               | 0 | 0 | 0 | 0 |
| <i>Acontias_plumbeus</i>                | 0 | 0 | 0 | 0 |
| <i>Acontias_poecilus</i>                | 0 | 0 | 0 | 0 |
| <i>Acontias_rippeli</i>                 | - | 0 | 0 | 0 |
| <i>Acrantophis_dumerili</i>             | 0 | 0 | 0 | 0 |
| <i>Acrantophis_madagascariensis</i>     | 0 | 0 | 0 | 0 |
| <i>Acratosaura_mentalis</i>             | - | 0 | 0 | 0 |

|                                    |   |   |   |   |
|------------------------------------|---|---|---|---|
| <i>Acrochordus_arafurae</i>        | 0 | 0 | 0 | 0 |
| <i>Acrochordus_granulatus</i>      | 0 | 0 | 0 | 0 |
| <i>Acrochordus_javanicus</i>       | 0 | 0 | 0 | 0 |
| <i>Acutotyphlops_kunuaensis</i>    | 1 | 0 | 0 | 0 |
| <i>Acutotyphlops_sp._NNV-2010a</i> | - | 0 | 0 | 0 |
| <i>Acutotyphlops_subocularis</i>   | 1 | 0 | 0 | 0 |
| <i>Adelophis_foxi</i>              | 0 | 0 | 0 | 0 |
| <i>Adelphicos_quadrivirgatus</i>   | 1 | 0 | 0 | 0 |
| <i>Adenorhinos_barbouri</i>        | - | 0 | 0 | 0 |
| <i>Adolfus_africanus</i>           | 1 | 0 | 0 | 0 |
| <i>Adolfus_alleni</i>              | 1 | 0 | 0 | 0 |
| <i>Adolfus_jacksoni</i>            | 1 | 0 | 0 | 0 |
| <i>Adolfus_vauereselli</i>         | 1 | 0 | 0 | 0 |
| <i>Aeluroscalabotes_felinus</i>    | 1 | 1 | 0 | 0 |
| <i>Afroablepharus_africanus</i>    | - | 0 | 0 | 0 |
| <i>Afroablepharus_annobonensis</i> | - | 0 | 0 | 0 |
| <i>Afroablepharus_wahlbergi</i>    | 1 | 0 | 0 | 0 |
| <i>Afroedura_karroica</i>          | 1 | 1 | 0 | 0 |
| <i>Afroedura_sp._multiporus</i>    | - | 1 | 0 | 0 |
| <i>Afrogecko_porphyreus</i>        | 1 | 1 | 0 | 0 |
| <i>Afrogecko_swartbergensis</i>    | 1 | 1 | 0 | 0 |
| <i>Afronatrix_anoscopus</i>        | 1 | 0 | 0 | 0 |
| <i>Afrotyphlops_angolensis</i>     | - | 0 | 0 | 0 |
| <i>Afrotyphlops_bibronii</i>       | - | 0 | 0 | 0 |
| <i>Afrotyphlops_congestus</i>      | - | 0 | 0 | 0 |
| <i>Afrotyphlops_fornasinii</i>     | - | 0 | 0 | 0 |
| <i>Afrotyphlops_lineolatus</i>     | - | 0 | 0 | 0 |
| <i>Afrotyphlops_punctatus</i>      | - | 0 | 0 | 0 |
| <i>Agama_aculeata</i>              | 1 | 0 | 0 | 0 |
| <i>Agama_agama</i>                 | 1 | 0 | 0 | 0 |
| <i>Agama_anchietae</i>             | 1 | 0 | 0 | 0 |
| <i>Agama_armata</i>                | 1 | 0 | 0 | 0 |
| <i>Agama_atra</i>                  | 1 | 0 | 0 | 0 |
| <i>Agama_boueti</i>                | 1 | 0 | 0 | 0 |
| <i>Agama_boulengeri</i>            | 1 | 0 | 0 | 0 |
| <i>Agama_castroviejoi</i>          | 1 | 0 | 0 | 0 |
| <i>Agama_caudospinosa</i>          | 1 | 0 | 0 | 0 |
| <i>Agama_doriae</i>                | 1 | 0 | 0 | 0 |
| <i>Agama_finchi</i>                | 1 | 0 | 0 | 0 |
| <i>Agama_gracilimembris</i>        | 1 | 0 | 0 | 0 |
| <i>Agama_hispida</i>               | 1 | 0 | 0 | 0 |
| <i>Agama_impalearis</i>            | 1 | 0 | 0 | 0 |
| <i>Agama_insularis</i>             | 1 | 0 | 0 | 0 |
| <i>Agama_kaimosae</i>              | 1 | 0 | 0 | 0 |

|                                    |   |   |   |   |
|------------------------------------|---|---|---|---|
| <i>Agama_lionotus</i>              | 1 | 0 | 0 | 0 |
| <i>Agama_mwanzae</i>               | 1 | 0 | 0 | 0 |
| <i>Agama_paragama</i>              | 1 | 0 | 0 | 0 |
| <i>Agama_planiceps</i>             | 1 | 0 | 0 | 0 |
| <i>Agama_rueppelli</i>             | 1 | 0 | 0 | 0 |
| <i>Agama_sankaranica</i>           | 1 | 0 | 0 | 0 |
| <i>Agama_spinosa</i>               | 1 | 0 | 0 | 0 |
| <i>Agama_weidholzi</i>             | 1 | 0 | 0 | 0 |
| <i>Agamodon_anguliceps</i>         | 1 | 0 | 0 | 0 |
| <i>Agamura_persica</i>             | 1 | 1 | 0 | 0 |
| <i>Agkistrodon_bilineatus</i>      | 0 | 0 | 0 | 0 |
| <i>Agkistrodon_contortrix</i>      | 0 | 0 | 0 | 0 |
| <i>Agkistrodon_piscivorus</i>      | 0 | 0 | 0 | 0 |
| <i>Agkistrodon_taylori</i>         | 0 | 0 | 0 | 0 |
| <i>Ahaetulla_fronticineta</i>      | 0 | 0 | 0 | 0 |
| <i>Ahaetulla_nasuta</i>            | 0 | 0 | 0 | 0 |
| <i>Ahaetulla_pulverulenta</i>      | 0 | 0 | 0 | 0 |
| <i>Aihuronyx_seychellensis</i>     | 1 | 1 | 0 | 0 |
| <i>Ailuronyx_tachyscopaeus</i>     | 1 | 1 | 0 | 0 |
| <i>Ailuronyx_trachygaster</i>      | 1 | 1 | 0 | 0 |
| <i>Aipysurus_apraefrontalis</i>    | 0 | 0 | 0 | 0 |
| <i>Aipysurus_duboisii</i>          | 0 | 0 | 0 | 0 |
| <i>Aipysurus_eydouxii</i>          | 0 | 0 | 0 | 0 |
| <i>Aipysurus_fuscus</i>            | 0 | 0 | 0 | 0 |
| <i>Aipysurus_laevis</i>            | 0 | 0 | 0 | 0 |
| <i>Algyroides_fitzingeri</i>       | 1 | 0 | 0 | 0 |
| <i>Algyroides_marchi</i>           | 1 | 0 | 0 | 0 |
| <i>Algyroides_moreoticus</i>       | 1 | 0 | 0 | 0 |
| <i>Algyroides_nigropunctatus</i>   | 1 | 0 | 0 | 0 |
| <i>Alhuidina_bellyi</i>            | 1 | 0 | 0 | 0 |
| <i>Alopoglossus_angulatus</i>      | 1 | 0 | 0 | 0 |
| <i>Alopoglossus_atriventris</i>    | 1 | 0 | 0 | 0 |
| <i>Alopoglossus_carinicaudatus</i> | - | 0 | 0 | 0 |
| <i>Alopoglossus_copii</i>          | 1 | 0 | 0 | 0 |
| <i>Alsophis_anomalus</i>           | 1 | 0 | 0 | 0 |
| <i>Alsophis_antiguae</i>           | 1 | 0 | 0 | 0 |
| <i>Alsophis_antillensis</i>        | 1 | 0 | 0 | 0 |
| <i>Alsophis_cantherigerus</i>      | 1 | 0 | 0 | 0 |
| <i>Alsophis_elegans</i>            | 1 | 0 | 0 | 0 |
| <i>Alsophis_rijgersmaei</i>        | 1 | 0 | 0 | 0 |
| <i>Alsophis_rufiventris</i>        | 1 | 0 | 0 | 0 |
| <i>Alsophylax_pipiens</i>          | 1 | 1 | 0 | 0 |
| <i>Amastridium_veliferum</i>       | 1 | 0 | 0 | 0 |
| <i>Amblyodipsas_dimidiata</i>      | 1 | 0 | 0 | 0 |

|                                      |   |   |   |   |
|--------------------------------------|---|---|---|---|
| <i>Amblyodipsas polylepis</i>        | 1 | 0 | 0 | 0 |
| <i>Amblyrhynchus cristatus</i>       | 1 | 0 | 0 | 0 |
| <i>Ameiva ameiva</i>                 | 1 | 0 | 0 | 0 |
| <i>Ameiva auberi</i>                 | 1 | 0 | 0 | 0 |
| <i>Ameiva bifrontata</i>             | 1 | 0 | 0 | 0 |
| <i>Ameiva chrysolema</i>             | 1 | 0 | 0 | 0 |
| <i>Ameiva corax</i>                  | 1 | 0 | 0 | 0 |
| <i>Ameiva dorsalis</i>               | 1 | 0 | 0 | 0 |
| <i>Ameiva erythrocephala</i>         | 1 | 0 | 0 | 0 |
| <i>Ameiva exsul</i>                  | 1 | 0 | 0 | 0 |
| <i>Ameiva festiva</i>                | 1 | 0 | 0 | 0 |
| <i>Ameiva fuscata</i>                | 1 | 0 | 0 | 0 |
| <i>Ameiva griswoldi</i>              | 1 | 0 | 0 | 0 |
| <i>Ameiva leberi</i>                 | 1 | 0 | 0 | 0 |
| <i>Ameiva lineolata</i>              | 1 | 0 | 0 | 0 |
| <i>Ameiva maynardi</i>               | 1 | 0 | 0 | 0 |
| <i>Ameiva plei</i>                   | 1 | 0 | 0 | 0 |
| <i>Ameiva pluvianotata</i>           | 1 | 0 | 0 | 0 |
| <i>Ameiva polops</i>                 | 1 | 0 | 0 | 0 |
| <i>Ameiva quadrilineata</i>          | 1 | 0 | 0 | 0 |
| <i>Ameiva taeniura</i>               | 1 | 0 | 0 | 0 |
| <i>Ameiva undulata</i>               | 1 | 0 | 0 | 0 |
| <i>Ameiva wetmorei</i>               | 1 | 0 | 0 | 0 |
| <i>Amphibolurus muricatus</i>        | 1 | 0 | 0 | 0 |
| <i>Amphibolurus norrisi</i>          | 1 | 0 | 0 | 0 |
| <i>Amphiesma craspedogaster</i>      | 1 | 0 | 0 | 0 |
| <i>Amphiesma sauteri</i>             | 1 | 0 | 0 | 0 |
| <i>Amphiesma stolatum</i>            | 1 | 0 | 0 | 0 |
| <i>Amphiglossus anosyensis</i>       | - | 0 | 0 | 0 |
| <i>Amphiglossus astrolabi</i>        | 1 | 0 | 0 | 0 |
| <i>Amphiglossus frontoparietalis</i> | 1 | 0 | 0 | 0 |
| <i>Amphiglossus igneocaudatus</i>    | - | 0 | 0 | 0 |
| <i>Amphiglossus intermedius</i>      | - | 0 | 0 | 0 |
| <i>Amphiglossus macrocercus</i>      | 0 | 0 | 0 | 0 |
| <i>Amphiglossus mandokava</i>        | - | 0 | 0 | 0 |
| <i>Amphiglossus melanurus</i>        | - | 0 | 0 | 0 |
| <i>Amphiglossus mouroundavae</i>     | - | 0 | 0 | 0 |
| <i>Amphiglossus nanus</i>            | - | 0 | 0 | 0 |
| <i>Amphiglossus ornaticeps</i>       | - | 0 | 0 | 0 |
| <i>Amphiglossus punctatus</i>        | - | 0 | 0 | 0 |
| <i>Amphiglossus reticulatus</i>      | 1 | 0 | 0 | 0 |
| <i>Amphiglossus splendidus</i>       | - | 0 | 0 | 0 |
| <i>Amphiglossus tanysoma</i>         | - | 0 | 0 | 0 |
| <i>Amphiglossus tsaratananensis</i>  | - | 0 | 0 | 0 |

|                                   |   |   |   |   |
|-----------------------------------|---|---|---|---|
| <i>Amphiglossus_waterloti</i>     | - | 0 | 0 | 0 |
| <i>Amphisbaena_alba</i>           | 1 | 0 | 0 | 0 |
| <i>Amphisbaena_anaemariae</i>     | 1 | 0 | 0 | 0 |
| <i>Amphisbaena_angustifrons</i>   | 1 | 0 | 0 | 0 |
| <i>Amphisbaena_bakeri</i>         | 1 | 0 | 0 | 0 |
| <i>Amphisbaena_barbouri</i>       | 1 | 0 | 0 | 0 |
| <i>Amphisbaena_bolivica</i>       | 1 | 0 | 0 | 0 |
| <i>Amphisbaena_caeca</i>          | 1 | 0 | 0 | 0 |
| <i>Amphisbaena_camura</i>         | 1 | 0 | 0 | 0 |
| <i>Amphisbaena_carlgansi</i>      | 1 | 0 | 0 | 0 |
| <i>Amphisbaena_cubana</i>         | 1 | 0 | 0 | 0 |
| <i>Amphisbaena_cunhai</i>         | 1 | 0 | 0 | 0 |
| <i>Amphisbaena_darwini</i>        | 1 | 0 | 0 | 0 |
| <i>Amphisbaena_fenestrata</i>     | 1 | 0 | 0 | 0 |
| <i>Amphisbaena_fuliginosa</i>     | 1 | 0 | 0 | 0 |
| <i>Amphisbaena_hastata</i>        | 1 | 0 | 0 | 0 |
| <i>Amphisbaena_hyporissor</i>     | 1 | 0 | 0 | 0 |
| <i>Amphisbaena_ignatiana</i>      | 1 | 0 | 0 | 0 |
| <i>Amphisbaena_innocens</i>       | 1 | 0 | 0 | 0 |
| <i>Amphisbaena_leali</i>          | 1 | 0 | 0 | 0 |
| <i>Amphisbaena_leeseri</i>        | 1 | 0 | 0 | 0 |
| <i>Amphisbaena_manni</i>          | 1 | 0 | 0 | 0 |
| <i>Amphisbaena_mertensii</i>      | 1 | 0 | 0 | 0 |
| <i>Amphisbaena_munoai</i>         | 1 | 0 | 0 | 0 |
| <i>Amphisbaena_schmidti</i>       | 1 | 0 | 0 | 0 |
| <i>Amphisbaena_silvestri</i>      | - | 0 | 0 | 0 |
| <i>Amphisbaena_vermicularis</i>   | 1 | 0 | 0 | 0 |
| <i>Amphisbaena_xera</i>           | 1 | 0 | 0 | 0 |
| <i>Amplorhinus_multimaculatus</i> | 0 | 0 | 0 | 0 |
| <i>Anatololacerta_anatolica</i>   | 1 | 0 | 0 | 0 |
| <i>Anatololacerta_danfordi</i>    | 1 | 0 | 0 | 0 |
| <i>Anatololacerta_oertzeni</i>    | 1 | 0 | 0 | 0 |
| <i>Androngo_trivittatus</i>       | 1 | 0 | 0 | 0 |
| <i>Anelytropsis_papillosus</i>    | 1 | 1 | 0 | 0 |
| <i>Angolosaurus_skoogi</i>        | - | 0 | 0 | 0 |
| <i>Anguis_fragilis</i>            | 0 | 0 | 0 | 0 |
| <i>Anilius_scytale</i>            | 0 | 0 | 0 | 0 |
| <i>Anisolepis_longicauda</i>      | 1 | 0 | 0 | 0 |
| <i>Anniella_geronimensis</i>      | 0 | 0 | 0 | 0 |
| <i>Anniella_pulchra</i>           | 0 | 0 | 0 | 0 |
| <i>Anolis_acutus</i>              | 1 | 0 | 0 | 0 |
| <i>Anolis_aeneus</i>              | 1 | 0 | 0 | 0 |
| <i>Anolis_aequatorialis</i>       | 1 | 0 | 0 | 0 |
| <i>Anolis_agassizi</i>            | 1 | 0 | 0 | 0 |

|                             |   |   |   |   |
|-----------------------------|---|---|---|---|
| <i>Anolis_ahli</i>          | 1 | 0 | 0 | 0 |
| <i>Anolis_alayoni</i>       | 1 | 0 | 0 | 0 |
| <i>Anolis_alfaroi</i>       | 1 | 0 | 0 | 0 |
| <i>Anolis_aliniger</i>      | 1 | 0 | 0 | 0 |
| <i>Anolis_allisoni</i>      | 1 | 0 | 0 | 0 |
| <i>Anolis_allogus</i>       | 1 | 0 | 0 | 0 |
| <i>Anolis_alumina</i>       | 1 | 0 | 0 | 0 |
| <i>Anolis_alutaceus</i>     | 1 | 0 | 0 | 0 |
| <i>Anolis_anatoloros</i>    | 1 | 0 | 0 | 0 |
| <i>Anolis_angusticeps</i>   | 1 | 0 | 0 | 0 |
| <i>Anolis_argenteolus</i>   | 1 | 0 | 0 | 0 |
| <i>Anolis_argillaceus</i>   | 1 | 0 | 0 | 0 |
| <i>Anolis_armouri</i>       | 1 | 0 | 0 | 0 |
| <i>Anolis_bahorucoensis</i> | 1 | 0 | 0 | 0 |
| <i>Anolis_baleatus</i>      | 1 | 0 | 0 | 0 |
| <i>Anolis_baracoae</i>      | 1 | 0 | 0 | 0 |
| <i>Anolis_barahonae</i>     | 1 | 0 | 0 | 0 |
| <i>Anolis_barbouri</i>      | 1 | 0 | 0 | 0 |
| <i>Anolis_bartschi</i>      | 1 | 0 | 0 | 0 |
| <i>Anolis_bimaculatus</i>   | 1 | 0 | 0 | 0 |
| <i>Anolis_biporcatus</i>    | 1 | 0 | 0 | 0 |
| <i>Anolis_boettgeri</i>     | 1 | 0 | 0 | 0 |
| <i>Anolis_bombiceps</i>     | 1 | 0 | 0 | 0 |
| <i>Anolis_bonairensis</i>   | 1 | 0 | 0 | 0 |
| <i>Anolis_bremeri</i>       | 1 | 0 | 0 | 0 |
| <i>Anolis_brevirostris</i>  | 1 | 0 | 0 | 0 |
| <i>Anolis_brunneus</i>      | 1 | 0 | 0 | 0 |
| <i>Anolis_calimae</i>       | 1 | 0 | 0 | 0 |
| <i>Anolis_carolinensis</i>  | 1 | 0 | 0 | 0 |
| <i>Anolis_carpenteri</i>    | 1 | 0 | 0 | 0 |
| <i>Anolis_caudalis</i>      | 1 | 0 | 0 | 0 |
| <i>Anolis_centralis</i>     | 1 | 0 | 0 | 0 |
| <i>Anolis_chloris</i>       | 1 | 0 | 0 | 0 |
| <i>Anolis_chlorocyanus</i>  | 1 | 0 | 0 | 0 |
| <i>Anolis_chocorum</i>      | 1 | 0 | 0 | 0 |
| <i>Anolis_christophei</i>   | 1 | 0 | 0 | 0 |
| <i>Anolis_chrysolepis</i>   | 1 | 0 | 0 | 0 |
| <i>Anolis_clivicola</i>     | 1 | 0 | 0 | 0 |
| <i>Anolis_coelestinus</i>   | 1 | 0 | 0 | 0 |
| <i>Anolis_conspersus</i>    | 1 | 0 | 0 | 0 |
| <i>Anolis_cooki</i>         | 1 | 0 | 0 | 0 |
| <i>Anolis_cristatellus</i>  | 1 | 0 | 0 | 0 |
| <i>Anolis_cupeyalensis</i>  | 1 | 0 | 0 | 0 |
| <i>Anolis_cuvieri</i>       | 1 | 0 | 0 | 0 |

|                               |   |   |   |   |
|-------------------------------|---|---|---|---|
| <i>Anolis_cyanopleurus</i>    | 1 | 0 | 0 | 0 |
| <i>Anolis_cybotes</i>         | 1 | 0 | 0 | 0 |
| <i>Anolis_danieli</i>         | 1 | 0 | 0 | 0 |
| <i>Anolis_darlingtoni</i>     | 1 | 0 | 0 | 0 |
| <i>Anolis_desechensis</i>     | 1 | 0 | 0 | 0 |
| <i>Anolis_distichus</i>       | 1 | 0 | 0 | 0 |
| <i>Anolis_dolichocephalus</i> | 1 | 0 | 0 | 0 |
| <i>Anolis_equestris</i>       | 1 | 0 | 0 | 0 |
| <i>Anolis_ernestwilliamsi</i> | 1 | 0 | 0 | 0 |
| <i>Anolis_etheridgei</i>      | 1 | 0 | 0 | 0 |
| <i>Anolis_eugenegrahami</i>   | 1 | 0 | 0 | 0 |
| <i>Anolis_euskalerruari</i>   | 1 | 0 | 0 | 0 |
| <i>Anolis_evermanni</i>       | 1 | 0 | 0 | 0 |
| <i>Anolis_extremus</i>        | 1 | 0 | 0 | 0 |
| <i>Anolis_ferreus</i>         | 1 | 0 | 0 | 0 |
| <i>Anolis_festae</i>          | 1 | 0 | 0 | 0 |
| <i>Anolis_fitchi</i>          | 1 | 0 | 0 | 0 |
| <i>Anolis_fowleri</i>         | 1 | 0 | 0 | 0 |
| <i>Anolis_fraseri</i>         | 1 | 0 | 0 | 0 |
| <i>Anolis_fuscoauratus</i>    | 1 | 0 | 0 | 0 |
| <i>Anolis_garmani</i>         | 1 | 0 | 0 | 0 |
| <i>Anolis_garridoi</i>        | 1 | 0 | 0 | 0 |
| <i>Anolis_gemmosus</i>        | 1 | 0 | 0 | 0 |
| <i>Anolis_gingivinus</i>      | 1 | 0 | 0 | 0 |
| <i>Anolis_grahami</i>         | 1 | 0 | 0 | 0 |
| <i>Anolis_griseus</i>         | 1 | 0 | 0 | 0 |
| <i>Anolis_gundlachi</i>       | 1 | 0 | 0 | 0 |
| <i>Anolis_haetianus</i>       | 1 | 0 | 0 | 0 |
| <i>Anolis_hendersoni</i>      | 1 | 0 | 0 | 0 |
| <i>Anolis_heterodermus</i>    | 1 | 0 | 0 | 0 |
| <i>Anolis_homolechis</i>      | 1 | 0 | 0 | 0 |
| <i>Anolis_huilae</i>          | 1 | 0 | 0 | 0 |
| <i>Anolis_imias</i>           | 1 | 0 | 0 | 0 |
| <i>Anolis_inderenae</i>       | 1 | 0 | 0 | 0 |
| <i>Anolis_inexpectatus</i>    | 1 | 0 | 0 | 0 |
| <i>Anolis_insolitus</i>       | 1 | 0 | 0 | 0 |
| <i>Anolis_isolepis</i>        | 1 | 0 | 0 | 0 |
| <i>Anolis_jacare</i>          | 1 | 0 | 0 | 0 |
| <i>Anolis_jubar</i>           | 1 | 0 | 0 | 0 |
| <i>Anolis_kemptoni</i>        | 1 | 0 | 0 | 0 |
| <i>Anolis_krugi</i>           | 1 | 0 | 0 | 0 |
| <i>Anolis_leachi</i>          | - | 0 | 0 | 0 |
| <i>Anolis_lemurinus</i>       | 1 | 0 | 0 | 0 |
| <i>Anolis_limifrons</i>       | 1 | 0 | 0 | 0 |

|                               |   |   |   |   |
|-------------------------------|---|---|---|---|
| <i>Anolis_lineatopus</i>      | 1 | 0 | 0 | 0 |
| <i>Anolis_lineatus</i>        | 1 | 0 | 0 | 0 |
| <i>Anolis_lividus</i>         | 1 | 0 | 0 | 0 |
| <i>Anolis_longiceps</i>       | 1 | 0 | 0 | 0 |
| <i>Anolis_longitibialis</i>   | 1 | 0 | 0 | 0 |
| <i>Anolis_loysiana</i>        | 1 | 0 | 0 | 0 |
| <i>Anolis_luciae</i>          | 1 | 0 | 0 | 0 |
| <i>Anolis_lucius</i>          | 1 | 0 | 0 | 0 |
| <i>Anolis_luteogularis</i>    | 1 | 0 | 0 | 0 |
| <i>Anolis_macilentus</i>      | 1 | 0 | 0 | 0 |
| <i>Anolis_maculigula</i>      | 1 | 0 | 0 | 0 |
| <i>Anolis_marcanoi</i>        | 1 | 0 | 0 | 0 |
| <i>Anolis_marmoratus</i>      | 1 | 0 | 0 | 0 |
| <i>Anolis_marron</i>          | 1 | 0 | 0 | 0 |
| <i>Anolis_maynardi</i>        | 1 | 0 | 0 | 0 |
| <i>Anolis_meridionalis</i>    | 1 | 0 | 0 | 0 |
| <i>Anolis_mestrei</i>         | 1 | 0 | 0 | 0 |
| <i>Anolis_monensis</i>        | 1 | 0 | 0 | 0 |
| <i>Anolis_monticola</i>       | 1 | 0 | 0 | 0 |
| <i>Anolis_neblininus</i>      | 1 | 0 | 0 | 0 |
| <i>Anolis_nicefori</i>        | 1 | 0 | 0 | 0 |
| <i>Anolis_noblei</i>          | 1 | 0 | 0 | 0 |
| <i>Anolis_nubilus</i>         | - | 0 | 0 | 0 |
| <i>Anolis_occultus</i>        | 1 | 0 | 0 | 0 |
| <i>Anolis_oculatus</i>        | 1 | 0 | 0 | 0 |
| <i>Anolis_olssoni</i>         | 1 | 0 | 0 | 0 |
| <i>Anolis_opalinus</i>        | 1 | 0 | 0 | 0 |
| <i>Anolis_ophiolepis</i>      | 1 | 0 | 0 | 0 |
| <i>Anolis_oporinus</i>        | 1 | 0 | 0 | 0 |
| <i>Anolis_ortonii</i>         | 1 | 0 | 0 | 0 |
| <i>Anolis_oxyllophus</i>      | 1 | 0 | 0 | 0 |
| <i>Anolis_paternus</i>        | 1 | 0 | 0 | 0 |
| <i>Anolis_peraccaae</i>       | 1 | 0 | 0 | 0 |
| <i>Anolis_placidus</i>        | 1 | 0 | 0 | 0 |
| <i>Anolis_pogus</i>           | 1 | 0 | 0 | 0 |
| <i>Anolis_polylepis</i>       | 1 | 0 | 0 | 0 |
| <i>Anolis_poncensis</i>       | 1 | 0 | 0 | 0 |
| <i>Anolis_porcatus</i>        | 1 | 0 | 0 | 0 |
| <i>Anolis_princeps</i>        | 1 | 0 | 0 | 0 |
| <i>Anolis_pulchellus</i>      | 1 | 0 | 0 | 0 |
| <i>Anolis_pumilis</i>         | - | 0 | 0 | 0 |
| <i>Anolis_punctatus</i>       | 1 | 0 | 0 | 0 |
| <i>Anolis_quadriocellifer</i> | 1 | 0 | 0 | 0 |
| <i>Anolis_reconditus</i>      | 1 | 0 | 0 | 0 |



|                               |   |   |   |   |
|-------------------------------|---|---|---|---|
| <i>Anolis_rejectus</i>        | 1 | 0 | 0 | 0 |
| <i>Anolis_richardii</i>       | 1 | 0 | 0 | 0 |
| <i>Anolis_ricordii</i>        | - | 0 | 0 | 0 |
| <i>Anolis_roquet</i>          | 1 | 0 | 0 | 0 |
| <i>Anolis_sabanus</i>         | 1 | 0 | 0 | 0 |
| <i>Anolis_sagrei</i>          | 1 | 0 | 0 | 0 |
| <i>Anolis_scriptus</i>        | 1 | 0 | 0 | 0 |
| <i>Anolis_semilineatus</i>    | 1 | 0 | 0 | 0 |
| <i>Anolis_sheplani</i>        | 1 | 0 | 0 | 0 |
| <i>Anolis_shrevei</i>         | 1 | 0 | 0 | 0 |
| <i>Anolis_singularis</i>      | 1 | 0 | 0 | 0 |
| <i>Anolis_smallwoodi</i>      | 1 | 0 | 0 | 0 |
| <i>Anolis_smaragdinus</i>     | 1 | 0 | 0 | 0 |
| <i>Anolis_strahmi</i>         | 1 | 0 | 0 | 0 |
| <i>Anolis_stratulus</i>       | 1 | 0 | 0 | 0 |
| <i>Anolis_terraealtae</i>     | 1 | 0 | 0 | 0 |
| <i>Anolis_tigrinus</i>        | 1 | 0 | 0 | 0 |
| <i>Anolis_trachyderma</i>     | 1 | 0 | 0 | 0 |
| <i>Anolis_transversalis</i>   | 1 | 0 | 0 | 0 |
| <i>Anolis_trinitatis</i>      | 1 | 0 | 0 | 0 |
| <i>Anolis_valencienni</i>     | 1 | 0 | 0 | 0 |
| <i>Anolis_vanidicus</i>       | 1 | 0 | 0 | 0 |
| <i>Anolis_vanzolinii</i>      | 1 | 0 | 0 | 0 |
| <i>Anolis_ventrimaculatus</i> | 1 | 0 | 0 | 0 |
| <i>Anolis_vermiculatus</i>    | 1 | 0 | 0 | 0 |
| <i>Anolis_wattsi</i>          | 1 | 0 | 0 | 0 |
| <i>Anolis_websteri</i>        | 1 | 0 | 0 | 0 |
| <i>Anolis_whitemani</i>       | 1 | 0 | 0 | 0 |
| <i>Anolis_woodi</i>           | 1 | 0 | 0 | 0 |
| <i>Anomalopus_leuckartii</i>  | 1 | 0 | 0 | 0 |
| <i>Anomalopus_mackayi</i>     | 1 | 0 | 0 | 0 |
| <i>Anomalopus_swansoni</i>    | 0 | 0 | 0 | 0 |
| <i>Anomalopus_verreauxi</i>   | 1 | 0 | 0 | 0 |
| <i>Anomochilus_leonardi</i>   | 1 | 0 | 0 | 0 |
| <i>Anops_kingii</i>           | 1 | 0 | 0 | 0 |
| <i>Antaresia_childreni</i>    | 1 | 0 | 0 | 0 |
| <i>Antaresia_maculosa</i>     | 1 | 0 | 0 | 0 |
| <i>Antaresia_perthensis</i>   | 1 | 0 | 0 | 0 |
| <i>Antaresia_stimsoni</i>     | 1 | 0 | 0 | 0 |
| <i>Antillophis_parvifrons</i> | 1 | 0 | 0 | 0 |
| <i>Aparallactus_capensis</i>  | 1 | 0 | 0 | 0 |
| <i>Aparallactus_guentheri</i> | 1 | 0 | 0 | 0 |
| <i>Aparallactus_modestus</i>  | 1 | 0 | 0 | 0 |
| <i>Aparallactus_wernerii</i>  | 1 | 0 | 0 | 0 |

|                                    |   |   |   |   |
|------------------------------------|---|---|---|---|
| <i>Apathya_cappadocica</i>         | 1 | 0 | 0 | 0 |
| <i>Aphaniotis_fusca</i>            | 1 | 0 | 0 | 0 |
| <i>Aplopeltura_boa</i>             | 1 | 0 | 0 | 0 |
| <i>Apodora_papuana</i>             | 1 | 0 | 0 | 0 |
| <i>Apostolepis_assimilis</i>       | 1 | 0 | 0 | 0 |
| <i>Apostolepis_dimidiata</i>       | 1 | 0 | 0 | 0 |
| <i>Apostolepis_flavotorquata</i>   | 1 | 0 | 0 | 0 |
| <i>Aprasia_aurita</i>              | 1 | 0 | 0 | 0 |
| <i>Aprasia_fusca</i>               | 1 | 0 | 0 | 0 |
| <i>Aprasia_inaurita</i>            | 1 | 0 | 0 | 0 |
| <i>Aprasia_parapulchella</i>       | 1 | 0 | 0 | 0 |
| <i>Aprasia_picturata</i>           | 1 | 0 | 0 | 0 |
| <i>Aprasia_pseudopulchella</i>     | 1 | 0 | 0 | 0 |
| <i>Aprasia_pulchella</i>           | 1 | 0 | 0 | 0 |
| <i>Aprasia_repens</i>              | 1 | 0 | 0 | 0 |
| <i>Aprasia_smithi</i>              | 1 | 0 | 0 | 0 |
| <i>Aprasia_striolata</i>           | 1 | 0 | 0 | 0 |
| <i>Archaius_tigris</i>             | - | 0 | 0 | 0 |
| <i>Aristelliger_georgeensis</i>    | 1 | 1 | 0 | 0 |
| <i>Aristelliger_lar</i>            | 1 | 1 | 0 | 0 |
| <i>Aristelliger_praesignis</i>     | 1 | 1 | 0 | 0 |
| <i>Arizona_elegans</i>             | 1 | 0 | 0 | 0 |
| <i>Arrhyton_dolichura</i>          | 1 | 0 | 0 | 0 |
| <i>Arrhyton_exiguum</i>            | 1 | 0 | 0 | 0 |
| <i>Arrhyton_funereum</i>           | 1 | 0 | 0 | 0 |
| <i>Arrhyton_landoi</i>             | 1 | 0 | 0 | 0 |
| <i>Arrhyton_procerum</i>           | 1 | 0 | 0 | 0 |
| <i>Arrhyton_supernum</i>           | 1 | 0 | 0 | 0 |
| <i>Arrhyton_taeniatum</i>          | 1 | 0 | 0 | 0 |
| <i>Arrhyton_tanyplectum</i>        | 1 | 0 | 0 | 0 |
| <i>Arrhyton_vittatum</i>           | 1 | 0 | 0 | 0 |
| <i>Arthrosaura_kockii</i>          | 1 | 0 | 0 | 0 |
| <i>Arthrosaura_reticulata</i>      | 1 | 0 | 0 | 0 |
| <i>Asaccus_platyrrhynchus</i>      | 1 | 1 | 0 | 0 |
| <i>Aspidelaps_scutatus</i>         | 1 | 0 | 0 | 0 |
| <i>Aspidites_melanocephalus</i>    | 1 | 0 | 0 | 0 |
| <i>Aspidites_ramsayi</i>           | 1 | 0 | 0 | 0 |
| <i>Aspidomorphus_lineaticollis</i> | 1 | 0 | 0 | 0 |
| <i>Aspidomorphus_muelleri</i>      | 1 | 0 | 0 | 0 |
| <i>Aspidomorphus_schlegeli</i>     | 1 | 0 | 0 | 0 |
| <i>Aspidoscelis_burti</i>          | 1 | 0 | 0 | 0 |
| <i>Aspidoscelis_ceralbensis</i>    | 1 | 0 | 0 | 0 |
| <i>Aspidoscelis_communis</i>       | 1 | 0 | 0 | 0 |
| <i>Aspidoscelis_costata</i>        | - | 0 | 0 | 0 |

|                                   |   |   |   |   |
|-----------------------------------|---|---|---|---|
| <i>Aspidoscelis_deppeii</i>       | 1 | 0 | 0 | 0 |
| <i>Aspidoscelis_gularis</i>       | 1 | 0 | 0 | 0 |
| <i>Aspidoscelis_guttata</i>       | - | 0 | 0 | 0 |
| <i>Aspidoscelis_hyperythra</i>    | - | 0 | 0 | 0 |
| <i>Aspidoscelis_inornata</i>      | - | 0 | 0 | 0 |
| <i>Aspidoscelis_laredoensis</i>   | 1 | 0 | 0 | 0 |
| <i>Aspidoscelis_lineatissima</i>  | - | 0 | 0 | 0 |
| <i>Aspidoscelis_marmorata</i>     | - | 0 | 0 | 0 |
| <i>Aspidoscelis_sexlineata</i>    | - | 0 | 0 | 0 |
| <i>Aspidoscelis_tigris</i>        | 1 | 0 | 0 | 0 |
| <i>Aspidoscelis_velox</i>         | 1 | 0 | 0 | 0 |
| <i>Aspidura_drummondhayi</i>      | 1 | 0 | 0 | 0 |
| <i>Aspidura_guentheri</i>         | 1 | 0 | 0 | 0 |
| <i>Aspidura_trachyprocta</i>      | 1 | 0 | 0 | 0 |
| <i>Aspronema_cochabambae</i>      | - | 0 | 0 | 0 |
| <i>Aspronema_dorsivittata</i>     | - | 0 | 0 | 0 |
| <i>Astrotia_stokesii</i>          | 0 | 0 | 0 | 0 |
| <i>Asymblepharus_alaicus</i>      | 0 | 0 | 0 | 0 |
| <i>Asymblepharus_sikimmensis</i>  | 1 | 0 | 0 | 0 |
| <i>Ateuchosaurus_pellopleurus</i> | - | 0 | 0 | 0 |
| <i>Atheris_ceratophora</i>        | 0 | 0 | 0 | 0 |
| <i>Atheris_chlorechis</i>         | 0 | 0 | 0 | 0 |
| <i>Atheris_desaixi</i>            | 0 | 0 | 0 | 0 |
| <i>Atheris_hispida</i>            | 0 | 0 | 0 | 0 |
| <i>Atheris_nitschei</i>           | 0 | 0 | 0 | 0 |
| <i>Atheris_squamigera</i>         | 0 | 0 | 0 | 0 |
| <i>Atlantolacerta_andreanskyi</i> | 1 | 0 | 0 | 0 |
| <i>Atractaspis_bibronii</i>       | 1 | 0 | 0 | 0 |
| <i>Atractaspis_boulengeri</i>     | 1 | 0 | 0 | 0 |
| <i>Atractaspis_corpulenta</i>     | 1 | 0 | 0 | 0 |
| <i>Atractaspis_irregularis</i>    | 1 | 0 | 0 | 0 |
| <i>Atractaspis_microlepidota</i>  | 1 | 0 | 0 | 0 |
| <i>Atractaspis_micropholis</i>    | 1 | 0 | 0 | 0 |
| <i>Atractus_albuquerquei</i>      | 1 | 0 | 0 | 0 |
| <i>Atractus_badius</i>            | 1 | 0 | 0 | 0 |
| <i>Atractus_elaps</i>             | 1 | 0 | 0 | 0 |
| <i>Atractus_flammigerus</i>       | 1 | 0 | 0 | 0 |
| <i>Atractus_schach</i>            | 1 | 0 | 0 | 0 |
| <i>Atractus_trihedrurus</i>       | 1 | 0 | 0 | 0 |
| <i>Atractus_wagleri</i>           | 1 | 0 | 0 | 0 |
| <i>Atractus_zidocki</i>           | - | 0 | 0 | 0 |
| <i>Atretium_schistosum</i>        | 1 | 0 | 0 | 0 |
| <i>Atretium_yunnanensis</i>       | 1 | 0 | 0 | 0 |
| <i>Atropoides_nummifer</i>        | 0 | 0 | 0 | 0 |

|                                      |   |   |   |   |
|--------------------------------------|---|---|---|---|
| <i>Atropoides_occiduus</i>           | 0 | 0 | 0 | 0 |
| <i>Atropoides_olmec</i>              | 0 | 0 | 0 | 0 |
| <i>Atropoides_picadoi</i>            | 0 | 0 | 0 | 0 |
| <i>Aulura_anomala</i>                | 1 | 0 | 0 | 0 |
| <i>Australolacerta_australis</i>     | 1 | 0 | 0 | 0 |
| <i>Austrelaps_labialis</i>           | 0 | 0 | 0 | 0 |
| <i>Austrelaps_superbus</i>           | 0 | 0 | 0 | 0 |
| <i>Austrotyphlops_ammodytes</i>      | 1 | 0 | 0 | 0 |
| <i>Austrotyphlops_diversus</i>       | 1 | 0 | 0 | 0 |
| <i>Austrotyphlops_endoterus</i>      | 1 | 0 | 0 | 0 |
| <i>Austrotyphlops_ganei</i>          | 1 | 0 | 0 | 0 |
| <i>Austrotyphlops_guentheri</i>      | 1 | 0 | 0 | 0 |
| <i>Austrotyphlops_howi</i>           | 1 | 0 | 0 | 0 |
| <i>Austrotyphlops_kimberleyensis</i> | 1 | 0 | 0 | 0 |
| <i>Austrotyphlops_ligatus</i>        | 1 | 0 | 0 | 0 |
| <i>Austrotyphlops_pinguis</i>        | 1 | 0 | 0 | 0 |
| <i>Austrotyphlops_splendidus</i>     | 1 | 0 | 0 | 0 |
| <i>Austrotyphlops_troglodytes</i>    | 1 | 0 | 0 | 0 |
| <i>Azemiops_fae</i>                  | 1 | 0 | 0 | 0 |
| <i>Bachia_barbouri</i>               | 1 | 0 | 0 | 0 |
| <i>Bachia_bicolor</i>                | 1 | 0 | 0 | 0 |
| <i>Bachia_bresslaui</i>              | 1 | 0 | 0 | 0 |
| <i>Bachia_dorbignyi</i>              | 1 | 0 | 0 | 0 |
| <i>Bachia_flavescens</i>             | 1 | 0 | 0 | 0 |
| <i>Bachia_heteropa</i>               | 1 | 0 | 0 | 0 |
| <i>Bachia_huallagana</i>             | 1 | 0 | 0 | 0 |
| <i>Bachia_intermedia</i>             | 1 | 0 | 0 | 0 |
| <i>Bachia_panoplia</i>               | 1 | 0 | 0 | 0 |
| <i>Bachia_peruana</i>                | 1 | 0 | 0 | 0 |
| <i>Bachia_scolecoides</i>            | 1 | 0 | 0 | 0 |
| <i>Bachia_trisanale</i>              | 1 | 0 | 0 | 0 |
| <i>Balanophis_ceylonensis</i>        | 1 | 0 | 0 | 0 |
| <i>Barisia_herrerae</i>              | 0 | 0 | 0 | 0 |
| <i>Barisia_imbricata</i>             | 0 | 0 | 0 | 0 |
| <i>Barisia_levicollis</i>            | 0 | 0 | 0 | 0 |
| <i>Barisia_rudicollis</i>            | 0 | 0 | 0 | 0 |
| <i>Bartleia_jigurru</i>              | 1 | 0 | 0 | 0 |
| <i>Basiliscus_basiliscus</i>         | 1 | 0 | 0 | 0 |
| <i>Basiliscus_galeritus</i>          | 1 | 0 | 0 | 0 |
| <i>Basiliscus_plumifrons</i>         | 1 | 0 | 0 | 0 |
| <i>Basiliscus_vittatus</i>           | 1 | 0 | 0 | 0 |
| <i>Bassiana_duperreyi</i>            | 1 | 0 | 0 | 0 |
| <i>Bassiana_trilineata</i>           | 1 | 0 | 0 | 0 |
| <i>Bavayia_cyclura</i>               | 1 | 0 | 0 | 0 |

|                                     |   |   |   |   |
|-------------------------------------|---|---|---|---|
| <i>Bavayia_geitaina</i>             | 1 | 0 | 0 | 0 |
| <i>Bavayia_goroensis</i>            | 1 | 0 | 0 | 0 |
| <i>Bavayia_madjo</i>                | 1 | 0 | 0 | 0 |
| <i>Bavayia_montana</i>              | 1 | 0 | 0 | 0 |
| <i>Bavayia_ornata</i>               | 1 | 0 | 0 | 0 |
| <i>Bavayia_pulchella</i>            | 1 | 0 | 0 | 0 |
| <i>Bavayia_sauvagii</i>             | 1 | 0 | 0 | 0 |
| <i>Bellatorias_frerei</i>           | 0 | 0 | 0 | 0 |
| <i>Bellatorias_major</i>            | 0 | 0 | 0 | 0 |
| <i>Bipes_biporus</i>                | 1 | 0 | 0 | 0 |
| <i>Bipes_canaliculatus</i>          | 1 | 0 | 0 | 0 |
| <i>Bipes_tridactylus</i>            | 1 | 0 | 0 | 0 |
| <i>Bitia_hydroides</i>              | 0 | 0 | 0 | 0 |
| <i>Bitis_arietans</i>               | 0 | 0 | 0 | 0 |
| <i>Bitis_atropos</i>                | 0 | 0 | 0 | 0 |
| <i>Bitis_caudalis</i>               | 0 | 0 | 0 | 0 |
| <i>Bitis_cornuta</i>                | 0 | 0 | 0 | 0 |
| <i>Bitis_gabonica</i>               | 0 | 0 | 0 | 0 |
| <i>Bitis_nasicornis</i>             | 0 | 0 | 0 | 0 |
| <i>Bitis_peringueyi</i>             | 0 | 0 | 0 | 0 |
| <i>Bitis_rubida</i>                 | 0 | 0 | 0 | 0 |
| <i>Bitis_worthingtoni</i>           | 0 | 0 | 0 | 0 |
| <i>Bitis_xeropaga</i>               | 0 | 0 | 0 | 0 |
| <i>Blaesodactylus_antongilensis</i> | 1 | 1 | 0 | 0 |
| <i>Blaesodactylus_boivini</i>       | 1 | 1 | 0 | 0 |
| <i>Blaesodactylus_sakalava</i>      | 1 | 1 | 0 | 0 |
| <i>Blanus_cinereus</i>              | 1 | 0 | 0 | 0 |
| <i>Blanus_mettetali</i>             | 1 | 0 | 0 | 0 |
| <i>Blanus_strauchi</i>              | 1 | 0 | 0 | 0 |
| <i>Blanus_tingitanus</i>            | 1 | 0 | 0 | 0 |
| <i>Boa_constrictor</i>              | 0 | 0 | 0 | 0 |
| <i>Bogertophis_rosaliae</i>         | 1 | 0 | 0 | 0 |
| <i>Bogertophis_subocularis</i>      | 1 | 0 | 0 | 0 |
| <i>Boiga_barnesii</i>               | 1 | 0 | 0 | 0 |
| <i>Boiga_beddomei</i>               | 1 | 0 | 0 | 0 |
| <i>Boiga_ceylonensis</i>            | 1 | 0 | 0 | 0 |
| <i>Boiga_cynodon</i>                | 1 | 0 | 0 | 0 |
| <i>Boiga_dendrophila</i>            | 1 | 0 | 0 | 0 |
| <i>Boiga_forsteni</i>               | 1 | 0 | 0 | 0 |
| <i>Boiga_irregularis</i>            | 1 | 0 | 0 | 0 |
| <i>Boiga_kraepelini</i>             | 1 | 0 | 0 | 0 |
| <i>Boiga_multomaculata</i>          | 1 | 0 | 0 | 0 |
| <i>Boiga_trigonata</i>              | 1 | 0 | 0 | 0 |
| <i>Boiruna_maculata</i>             | 1 | 0 | 0 | 0 |

|                                     |   |   |   |   |
|-------------------------------------|---|---|---|---|
| <i>Borikenophis_portoricensis</i>   | - | 0 | 0 | 0 |
| <i>Borikenophis_variegatus</i>      | - | 0 | 0 | 0 |
| <i>Bothriechis_aurifer</i>          | 0 | 0 | 0 | 0 |
| <i>Bothriechis_bicolor</i>          | 0 | 0 | 0 | 0 |
| <i>Bothriechis_lateralis</i>        | 0 | 0 | 0 | 0 |
| <i>Bothriechis_marchi</i>           | 0 | 0 | 0 | 0 |
| <i>Bothriechis_nigroviridis</i>     | 0 | 0 | 0 | 0 |
| <i>Bothriechis_rowleyi</i>          | 0 | 0 | 0 | 0 |
| <i>Bothriechis_schlegelii</i>       | 0 | 0 | 0 | 0 |
| <i>Bothriechis_superciliaris</i>    | - | 0 | 0 | 0 |
| <i>Bothriechis_thalassinus</i>      | 0 | 0 | 0 | 0 |
| <i>Bothriopsis_bilineata</i>        | 0 | 0 | 0 | 0 |
| <i>Bothriopsis_chloromelas</i>      | 0 | 0 | 0 | 0 |
| <i>Bothriopsis_pulchra</i>          | 0 | 0 | 0 | 0 |
| <i>Bothriopsis_taeniata</i>         | 0 | 0 | 0 | 0 |
| <i>Bothrochilus_boa</i>             | 1 | 0 | 0 | 0 |
| <i>Bothrocophias_hyoprora</i>       | 0 | 0 | 0 | 0 |
| <i>Bothrocophias_microphthalmus</i> | 0 | 0 | 0 | 0 |
| <i>Bothrolycus_ater</i>             | 1 | 0 | 0 | 0 |
| <i>Bothrophthalmus_brunneus</i>     | 1 | 0 | 0 | 0 |
| <i>Bothrophthalmus_lineatus</i>     | 1 | 0 | 0 | 0 |
| <i>Bothropoides_diporus</i>         | - | 0 | 0 | 0 |
| <i>Bothrops_alcatraz</i>            | 0 | 0 | 0 | 0 |
| <i>Bothrops_alternatus</i>          | 0 | 0 | 0 | 0 |
| <i>Bothrops_ammodytoides</i>        | 0 | 0 | 0 | 0 |
| <i>Bothrops_asper</i>               | 0 | 0 | 0 | 0 |
| <i>Bothrops_atrox</i>               | 0 | 0 | 0 | 0 |
| <i>Bothrops_brazili</i>             | 0 | 0 | 0 | 0 |
| <i>Bothrops_campbelli</i>           | - | 0 | 0 | 0 |
| <i>Bothrops_caribbaeus</i>          | 0 | 0 | 0 | 0 |
| <i>Bothrops_colombiensis</i>        | 0 | 0 | 0 | 0 |
| <i>Bothrops_cotiara</i>             | 0 | 0 | 0 | 0 |
| <i>Bothrops_erythromelas</i>        | 0 | 0 | 0 | 0 |
| <i>Bothrops_fonsecai</i>            | 0 | 0 | 0 | 0 |
| <i>Bothrops_insularis</i>           | 0 | 0 | 0 | 0 |
| <i>Bothrops_itapetiningae</i>       | 0 | 0 | 0 | 0 |
| <i>Bothrops_jararaca</i>            | 0 | 0 | 0 | 0 |
| <i>Bothrops_jararacussu</i>         | 0 | 0 | 0 | 0 |
| <i>Bothrops_lanceolatus</i>         | 0 | 0 | 0 | 0 |
| <i>Bothrops_leucurus</i>            | 0 | 0 | 0 | 0 |
| <i>Bothrops_marajoensis</i>         | 0 | 0 | 0 | 0 |
| <i>Bothrops_moojeni</i>             | 0 | 0 | 0 | 0 |
| <i>Bothrops_neuwiedi</i>            | 0 | 0 | 0 | 0 |
| <i>Bothrops_pictus</i>              | 0 | 0 | 0 | 0 |

|                                    |   |   |   |   |
|------------------------------------|---|---|---|---|
| <i>Bothrops_punctatus</i>          | - | 0 | 0 | 0 |
| <i>Boulengerina_annulata</i>       | - | 0 | 0 | 0 |
| <i>Brachylophus_fasciatus</i>      | 1 | 0 | 0 | 0 |
| <i>Brachylophus_vitiensis</i>      | 1 | 0 | 0 | 0 |
| <i>Brachymeles_apus</i>            | 0 | 0 | 0 | 0 |
| <i>Brachymeles_bicolor</i>         | 0 | 0 | 0 | 0 |
| <i>Brachymeles_bonitae</i>         | 0 | 0 | 0 | 0 |
| <i>Brachymeles_boulengeri</i>      | 0 | 0 | 0 | 0 |
| <i>Brachymeles_cebuensis</i>       | 0 | 0 | 0 | 0 |
| <i>Brachymeles_elerae</i>          | 0 | 0 | 0 | 0 |
| <i>Brachymeles_gracilis</i>        | 0 | 0 | 0 | 0 |
| <i>Brachymeles_minimus</i>         | 0 | 0 | 0 | 0 |
| <i>Brachymeles_miriamae</i>        | - | 0 | 0 | 0 |
| <i>Brachymeles_pathfinderi</i>     | 0 | 0 | 0 | 0 |
| <i>Brachymeles_samarensis</i>      | 0 | 0 | 0 | 0 |
| <i>Brachymeles_schadenbergi</i>    | 0 | 0 | 0 | 0 |
| <i>Brachymeles_talinis</i>         | 0 | 0 | 0 | 0 |
| <i>Brachymeles_tridactylus</i>     | 0 | 0 | 0 | 0 |
| <i>Brachyophidium_rhodogaster</i>  | 0 | 0 | 0 | 0 |
| <i>Brachyurophis_semifasciatus</i> | - | 0 | 0 | 0 |
| <i>Bradypodion_atromontanum</i>    | 0 | 0 | 0 | 0 |
| <i>Bradypodion_caffer</i>          | - | 0 | 0 | 0 |
| <i>Bradypodion_damaranum</i>       | 0 | 0 | 0 | 0 |
| <i>Bradypodion_dracomontanum</i>   | 0 | 0 | 0 | 0 |
| <i>Bradypodion_gutturale</i>       | 0 | 0 | 0 | 0 |
| <i>Bradypodion_kentanicum</i>      | - | 0 | 0 | 0 |
| <i>Bradypodion_melanocephalum</i>  | 0 | 0 | 0 | 0 |
| <i>Bradypodion_nemorale</i>        | 0 | 0 | 0 | 0 |
| <i>Bradypodion_occidentale</i>     | 0 | 0 | 0 | 0 |
| <i>Bradypodion_pumilum</i>         | 0 | 0 | 0 | 0 |
| <i>Bradypodion_setaroi</i>         | 0 | 0 | 0 | 0 |
| <i>Bradypodion_taeiabronchum</i>   | 0 | 0 | 0 | 0 |
| <i>Bradypodion_thamnobates</i>     | 0 | 0 | 0 | 0 |
| <i>Bradypodion_transvaalense</i>   | 0 | 0 | 0 | 0 |
| <i>Bradypodion_ventrale</i>        | 0 | 0 | 0 | 0 |
| <i>Brasiliscincus_agilis</i>       | - | 0 | 0 | 0 |
| <i>Brasiliscincus_caissara</i>     | - | 0 | 0 | 0 |
| <i>Brasiliscincus_heathi</i>       | - | 0 | 0 | 0 |
| <i>Briba_brasiliana</i>            | - | 1 | 0 | 0 |
| <i>Bronchocela_cristatella</i>     | 1 | 0 | 0 | 0 |
| <i>Bronia_brasiliana</i>           | 1 | 0 | 0 | 0 |
| <i>Bronia_kraoh</i>                | 1 | 0 | 0 | 0 |
| <i>Bronia_saxosa</i>               | 1 | 0 | 0 | 0 |
| <i>Brookesia_ambreensis</i>        | 1 | 0 | 0 | 0 |

|                                  |   |   |   |   |
|----------------------------------|---|---|---|---|
| <i>Brookesia_antakarana</i>      | 1 | 0 | 0 | 0 |
| <i>Brookesia_betschi</i>         | 1 | 0 | 0 | 0 |
| <i>Brookesia_bonsi</i>           | 1 | 0 | 0 | 0 |
| <i>Brookesia_brygooi</i>         | 1 | 0 | 0 | 0 |
| <i>Brookesia_decaryi</i>         | 1 | 0 | 0 | 0 |
| <i>Brookesia_dentata</i>         | 1 | 0 | 0 | 0 |
| <i>Brookesia_ebenau</i>          | 1 | 0 | 0 | 0 |
| <i>Brookesia_exarmata</i>        | 1 | 0 | 0 | 0 |
| <i>Brookesia_griveaudi</i>       | 1 | 0 | 0 | 0 |
| <i>Brookesia_karchei</i>         | 1 | 0 | 0 | 0 |
| <i>Brookesia_lineata</i>         | 1 | 0 | 0 | 0 |
| <i>Brookesia_lolontany</i>       | 1 | 0 | 0 | 0 |
| <i>Brookesia_minima</i>          | 1 | 0 | 0 | 0 |
| <i>Brookesia_nasus</i>           | 1 | 0 | 0 | 0 |
| <i>Brookesia_perarmata</i>       | 1 | 0 | 0 | 0 |
| <i>Brookesia_peyrierasi</i>      | 1 | 0 | 0 | 0 |
| <i>Brookesia_sp. Betampona</i>   | - | 0 | 0 | 0 |
| <i>Brookesia_stumpffi</i>        | 1 | 0 | 0 | 0 |
| <i>Brookesia_superciliaris</i>   | 1 | 0 | 0 | 0 |
| <i>Brookesia_therezieni</i>      | 1 | 0 | 0 | 0 |
| <i>Brookesia_thieli</i>          | 1 | 0 | 0 | 0 |
| <i>Brookesia_tuberculata</i>     | 1 | 0 | 0 | 0 |
| <i>Brookesia_vadoni</i>          | 1 | 0 | 0 | 0 |
| <i>Brookesia_valerieae</i>       | 1 | 0 | 0 | 0 |
| <i>Bufoinceps_laungwalaensis</i> | 1 | 0 | 0 | 0 |
| <i>Bufoinceps_depressiceps</i>   | 1 | 0 | 0 | 0 |
| <i>Bufoinceps_procterae</i>      | 1 | 0 | 0 | 0 |
| <i>Bungarus_bungaroides</i>      | 1 | 0 | 0 | 0 |
| <i>Bungarus_caeruleus</i>        | 1 | 0 | 0 | 0 |
| <i>Bungarus_candidus</i>         | 1 | 0 | 0 | 0 |
| <i>Bungarus_ceylonicus</i>       | 1 | 0 | 0 | 0 |
| <i>Bungarus_fasciatus</i>        | 1 | 0 | 0 | 0 |
| <i>Bungarus_flaviceps</i>        | 1 | 0 | 0 | 0 |
| <i>Bungarus_multicinctus</i>     | 1 | 0 | 0 | 0 |
| <i>Bungarus_niger</i>            | 1 | 0 | 0 | 0 |
| <i>Bungarus_sindanus</i>         | 1 | 0 | 0 | 0 |
| <i>Bunopus_crassicauda</i>       | 1 | 1 | 0 | 0 |
| <i>Bunopus_tuberculatus</i>      | 1 | 1 | 0 | 0 |
| <i>Caaeteboia_amarali</i>        | - | 0 | 0 | 0 |
| <i>Cacophis_squamulosus</i>      | 1 | 0 | 0 | 0 |
| <i>Cadea_blanoides</i>           | 1 | 0 | 0 | 0 |
| <i>Caimanops_amphiboluroides</i> | 1 | 0 | 0 | 0 |
| <i>Calabaria_reinhardtii</i>     | 1 | 0 | 0 | 0 |
| <i>Calamaria_pavimentata</i>     | 1 | 0 | 0 | 0 |



|                                          |   |   |   |   |
|------------------------------------------|---|---|---|---|
| <i>Calamodontophis_paucidens</i>         | 0 | 0 | 0 | 0 |
| <i>Caledoniscincus_aquilonius</i>        | - | 0 | 0 | 0 |
| <i>Caledoniscincus_atropunctatus</i>     | - | 0 | 0 | 0 |
| <i>Caledoniscincus_auratus</i>           | - | 0 | 0 | 0 |
| <i>Caledoniscincus_austrocaledonicus</i> | - | 0 | 0 | 0 |
| <i>Caledoniscincus_chazeaui</i>          | - | 0 | 0 | 0 |
| <i>Caledoniscincus_festivus</i>          | - | 0 | 0 | 0 |
| <i>Caledoniscincus_haplorhinus</i>       | - | 0 | 0 | 0 |
| <i>Caledoniscincus_orestes</i>           | - | 0 | 0 | 0 |
| <i>Caledoniscincus_renevieri</i>         | - | 0 | 0 | 0 |
| <i>Caledoniscincus_terma</i>             | - | 0 | 0 | 0 |
| <i>Calliophis_melanurus</i>              | 1 | 0 | 0 | 0 |
| <i>Callisaurus_draconoides</i>           | 1 | 0 | 0 | 0 |
| <i>Callopistes_flavipunctatus</i>        | 1 | 0 | 0 | 0 |
| <i>Callopistes_maculatus</i>             | 1 | 0 | 0 | 0 |
| <i>Calloselasma_rhodostoma</i>           | 1 | 0 | 0 | 0 |
| <i>Calodactylodes_aureus</i>             | 1 | 1 | 0 | 0 |
| <i>Calodactylodes_illingworthorum</i>    | 1 | 1 | 0 | 0 |
| <i>Calotes_calotes</i>                   | 1 | 0 | 0 | 0 |
| <i>Calotes_ceylonensis</i>               | 1 | 0 | 0 | 0 |
| <i>Calotes_chincollium</i>               | 1 | 0 | 0 | 0 |
| <i>Calotes_emma</i>                      | 1 | 0 | 0 | 0 |
| <i>Calotes_htunwini</i>                  | 1 | 0 | 0 | 0 |
| <i>Calotes_irawadi</i>                   | 1 | 0 | 0 | 0 |
| <i>Calotes_liocephalus</i>               | 1 | 0 | 0 | 0 |
| <i>Calotes_liolepis</i>                  | 1 | 0 | 0 | 0 |
| <i>Calotes_mystaceus</i>                 | 1 | 0 | 0 | 0 |
| <i>Calotes_nigrilabris</i>               | 1 | 0 | 0 | 0 |
| <i>Calotes_versicolor</i>                | 1 | 0 | 0 | 0 |
| <i>Calumma_ambreense</i>                 | - | 0 | 0 | 0 |
| <i>Calumma_boettgeri</i>                 | 1 | 0 | 0 | 0 |
| <i>Calumma_brevicornis</i>               | - | 0 | 0 | 0 |
| <i>Calumma_capuroni</i>                  | 1 | 0 | 0 | 0 |
| <i>Calumma_crypticum</i>                 | 1 | 0 | 0 | 0 |
| <i>Calumma_cucullatum</i>                | 1 | 0 | 0 | 0 |
| <i>Calumma_fallax</i>                    | 1 | 0 | 0 | 0 |
| <i>Calumma_furcifer</i>                  | 1 | 0 | 0 | 0 |
| <i>Calumma_gallus</i>                    | 1 | 0 | 0 | 0 |
| <i>Calumma_gastrotaenia</i>              | 1 | 0 | 0 | 0 |
| <i>Calumma_globifer</i>                  | 1 | 0 | 0 | 0 |
| <i>Calumma_guibeii</i>                   | 1 | 0 | 0 | 0 |
| <i>Calumma_hilleni</i>                   | 1 | 0 | 0 | 0 |
| <i>Calumma_malthe</i>                    | 1 | 0 | 0 | 0 |
| <i>Calumma_nasutum</i>                   | 1 | 0 | 0 | 0 |

|                                      |   |   |   |   |
|--------------------------------------|---|---|---|---|
| <i>Calumma_oshaghnessyi</i>          | 1 | 0 | 0 | 0 |
| <i>Calumma_parsonii</i>              | 1 | 0 | 0 | 0 |
| <i>Calumma_tsaratananense</i>        | 1 | 0 | 0 | 0 |
| <i>Calyptommatous_confusionibus</i>  | 1 | 0 | 0 | 0 |
| <i>Calyptommatous_leiolepis</i>      | 1 | 0 | 0 | 0 |
| <i>Calyptommatous_nicterus</i>       | 1 | 0 | 0 | 0 |
| <i>Calyptommatous_sinebrachiatus</i> | 1 | 0 | 0 | 0 |
| <i>Calyptotis_lepidorostrum</i>      | 1 | 0 | 0 | 0 |
| <i>Calyptotis_ruficauda</i>          | 1 | 0 | 0 | 0 |
| <i>Calyptotis_scutirostrum</i>       | 1 | 0 | 0 | 0 |
| <i>Candoia_aspera</i>                | 0 | 0 | 0 | 0 |
| <i>Candoia_bibroni</i>               | 0 | 0 | 0 | 0 |
| <i>Candoia_carinata</i>              | 0 | 0 | 0 | 0 |
| <i>Cantoria_violacea</i>             | 0 | 0 | 0 | 0 |
| <i>Carinatogecko_heteropholis</i>    | 1 | 1 | 0 | 0 |
| <i>Carlia_amax</i>                   | 1 | 0 | 0 | 0 |
| <i>Carlia_bicarinata</i>             | 1 | 0 | 0 | 0 |
| <i>Carlia_coensis</i>                | 1 | 0 | 0 | 0 |
| <i>Carlia_dogare</i>                 | 1 | 0 | 0 | 0 |
| <i>Carlia_fusca</i>                  | 1 | 0 | 0 | 0 |
| <i>Carlia_gracilis</i>               | 1 | 0 | 0 | 0 |
| <i>Carlia_jarnoldae</i>              | 1 | 0 | 0 | 0 |
| <i>Carlia_johnstonei</i>             | 1 | 0 | 0 | 0 |
| <i>Carlia_longipes</i>               | 1 | 0 | 0 | 0 |
| <i>Carlia_munda</i>                  | 1 | 0 | 0 | 0 |
| <i>Carlia_mundivensis</i>            | 1 | 0 | 0 | 0 |
| <i>Carlia_mysi</i>                   | 1 | 0 | 0 | 0 |
| <i>Carlia_parrhasius</i>             | - | 0 | 0 | 0 |
| <i>Carlia_pectoralis</i>             | 1 | 0 | 0 | 0 |
| <i>Carlia_rhomboidalis</i>           | 1 | 0 | 0 | 0 |
| <i>Carlia_rostralis</i>              | 1 | 0 | 0 | 0 |
| <i>Carlia_rubrigularis</i>           | 1 | 0 | 0 | 0 |
| <i>Carlia_rufilatus</i>              | 1 | 0 | 0 | 0 |
| <i>Carlia_schmeltzii</i>             | 1 | 0 | 0 | 0 |
| <i>Carlia_scirtetis</i>              | 1 | 0 | 0 | 0 |
| <i>Carlia_storri</i>                 | 1 | 0 | 0 | 0 |
| <i>Carlia_tetradactyla</i>           | 1 | 0 | 0 | 0 |
| <i>Carlia_triacantha</i>             | 1 | 0 | 0 | 0 |
| <i>Carlia_vivax</i>                  | 1 | 0 | 0 | 0 |
| <i>Carphodactylus_laevis</i>         | 1 | 0 | 0 | 0 |
| <i>Carphophis_amoenus</i>            | 1 | 0 | 0 | 0 |
| <i>Casarea_dussumieri</i>            | 1 | 0 | 0 | 0 |
| <i>Causus_defilippi</i>              | - | 0 | 0 | 0 |
| <i>Causus_resimus</i>                | 1 | 0 | 0 | 0 |

|                                    |   |   |   |   |
|------------------------------------|---|---|---|---|
| <i>Causus_rhombeatus</i>           | 1 | 0 | 0 | 0 |
| <i>Cautula_zia</i>                 | 1 | 0 | 0 | 0 |
| <i>Celatiscincus_euryotis</i>      | - | 0 | 0 | 0 |
| <i>Celatiscincus_similis</i>       | - | 0 | 0 | 0 |
| <i>Celestus_enneagrammus</i>       | 0 | 0 | 0 | 0 |
| <i>Cemophora_coccinea</i>          | 1 | 0 | 0 | 0 |
| <i>Cerastes_cerastes</i>           | 1 | 0 | 0 | 0 |
| <i>Cerastes_gasperettii</i>        | 1 | 0 | 0 | 0 |
| <i>Cerastes_vipera</i>             | 0 | 0 | 0 | 0 |
| <i>Ceratophora_aspera</i>          | 1 | 0 | 0 | 0 |
| <i>Ceratophora_erdeleni</i>        | 1 | 0 | 0 | 0 |
| <i>Ceratophora_karu</i>            | 1 | 0 | 0 | 0 |
| <i>Ceratophora_stoddartii</i>      | 1 | 0 | 0 | 0 |
| <i>Cerberus_australis</i>          | 0 | 0 | 0 | 0 |
| <i>Cerberus_microlepis</i>         | 0 | 0 | 0 | 0 |
| <i>Cerberus_rynchops</i>           | 0 | 0 | 0 | 0 |
| <i>Cercaspis_carinatus</i>         | 1 | 0 | 0 | 0 |
| <i>Cercolophia_cuiabana</i>        | 1 | 0 | 0 | 0 |
| <i>Cercolophia_roberti</i>         | 1 | 0 | 0 | 0 |
| <i>Cercosaura_ocellata</i>         | 1 | 0 | 0 | 0 |
| <i>Cerrophidion_barbouri</i>       | 0 | 0 | 0 | 0 |
| <i>Cerrophidion_godmani</i>        | 0 | 0 | 0 | 0 |
| <i>Cerrophidion_petlalcalensis</i> | 0 | 0 | 0 | 0 |
| <i>Cerrophidion_tzotzilorum</i>    | 0 | 0 | 0 | 0 |
| <i>Chalarodon_madagascariensis</i> | 1 | 0 | 0 | 0 |
| <i>Chalcides_bedriagai</i>         | 0 | 0 | 0 | 0 |
| <i>Chalcides_boulengeri</i>        | 0 | 0 | 0 | 0 |
| <i>Chalcides_chalcides</i>         | 0 | 0 | 0 | 0 |
| <i>Chalcides_coeruleopunctatus</i> | 0 | 0 | 0 | 0 |
| <i>Chalcides_colosii</i>           | 0 | 0 | 0 | 0 |
| <i>Chalcides_guentheri</i>         | 0 | 0 | 0 | 0 |
| <i>Chalcides_lanzai</i>            | 0 | 0 | 0 | 0 |
| <i>Chalcides_manueli</i>           | 0 | 0 | 0 | 0 |
| <i>Chalcides_mauritanicus</i>      | 0 | 0 | 0 | 0 |
| <i>Chalcides_minutus</i>           | 0 | 0 | 0 | 0 |
| <i>Chalcides_mionecton</i>         | 0 | 0 | 0 | 0 |
| <i>Chalcides_montanus</i>          | 0 | 0 | 0 | 0 |
| <i>Chalcides_ocellatus</i>         | 0 | 0 | 0 | 0 |
| <i>Chalcides_parallelus</i>        | 0 | 0 | 0 | 0 |
| <i>Chalcides_polylepis</i>         | 0 | 0 | 0 | 0 |
| <i>Chalcides_pseudostriatus</i>    | 0 | 0 | 0 | 0 |
| <i>Chalcides_sepsoides</i>         | 0 | 0 | 0 | 0 |
| <i>Chalcides_sexlineatus</i>       | 0 | 0 | 0 | 0 |
| <i>Chalcides_sphenopsiformis</i>   | 0 | 0 | 0 | 0 |

|                                    |   |   |   |   |
|------------------------------------|---|---|---|---|
| <i>Chalcides striatus</i>          | 0 | 0 | 0 | 0 |
| <i>Chalcides viridanus</i>         | 0 | 0 | 0 | 0 |
| <i>Chamaeleo africanus</i>         | 1 | 0 | 0 | 0 |
| <i>Chamaeleo arabicus</i>          | 1 | 0 | 0 | 0 |
| <i>Chamaeleo calcaricarens</i>     | 1 | 0 | 0 | 0 |
| <i>Chamaeleo calyptratus</i>       | 1 | 0 | 0 | 0 |
| <i>Chamaeleo chamaeleon</i>        | 1 | 0 | 0 | 0 |
| <i>Chamaeleo dilepis</i>           | 1 | 0 | 0 | 0 |
| <i>Chamaeleo gracilis</i>          | 1 | 0 | 0 | 0 |
| <i>Chamaeleo laevigatus</i>        | - | 0 | 0 | 0 |
| <i>Chamaeleo monachus</i>          | 1 | 0 | 0 | 0 |
| <i>Chamaeleo namaquensis</i>       | 1 | 0 | 0 | 0 |
| <i>Chamaeleo necasi</i>            | - | 0 | 0 | 0 |
| <i>Chamaeleo roperi</i>            | - | 0 | 0 | 0 |
| <i>Chamaeleo senegalensis</i>      | - | 0 | 0 | 0 |
| <i>Chamaeleo zeylanicus</i>        | 1 | 0 | 0 | 0 |
| <i>Chamaeleolis barbatus</i>       | - | 0 | 0 | 0 |
| <i>Chamaeleolis chamaeleonides</i> | - | 0 | 0 | 0 |
| <i>Chamaeleolis guamuhaya</i>      | - | 0 | 0 | 0 |
| <i>Chamaeleolis porcus</i>         | - | 0 | 0 | 0 |
| <i>Chamaesaura aenea</i>           | 0 | 0 | 0 | 0 |
| <i>Chamaesaura anguina</i>         | 0 | 0 | 0 | 0 |
| <i>Charina bottae</i>              | 0 | 0 | 0 | 0 |
| <i>Charina trivirgata</i>          | - | 0 | 0 | 0 |
| <i>Chatogekko amazonicus</i>       | - | 1 | 0 | 0 |
| <i>Chelosania brunnea</i>          | 1 | 0 | 0 | 0 |
| <i>Chilomeniscus stramineus</i>    | 1 | 0 | 0 | 0 |
| <i>Chionactis occipitalis</i>      | 1 | 0 | 0 | 0 |
| <i>Chioninia coctei</i>            | - | 0 | 0 | 0 |
| <i>Chioninia delalandii</i>        | 0 | 0 | 0 | 0 |
| <i>Chioninia fogoensis</i>         | 0 | 0 | 0 | 0 |
| <i>Chioninia spinalis</i>          | 0 | 0 | 0 | 0 |
| <i>Chioninia stangeri</i>          | 0 | 0 | 0 | 0 |
| <i>Chioninia vaillantii</i>        | 0 | 0 | 0 | 0 |
| <i>Chirindia swynnertoni</i>       | 1 | 0 | 0 | 0 |
| <i>Chironius bicarinatus</i>       | 1 | 0 | 0 | 0 |
| <i>Chironius carinatus</i>         | 1 | 0 | 0 | 0 |
| <i>Chironius exoletus</i>          | 1 | 0 | 0 | 0 |
| <i>Chironius flavolineatus</i>     | 1 | 0 | 0 | 0 |
| <i>Chironius fuscus</i>            | 1 | 0 | 0 | 0 |
| <i>Chironius grandisquamis</i>     | 1 | 0 | 0 | 0 |
| <i>Chironius laevicollis</i>       | 1 | 0 | 0 | 0 |
| <i>Chironius laurenti</i>          | 1 | 0 | 0 | 0 |
| <i>Chironius monticola</i>         | 1 | 0 | 0 | 0 |

|                                      |   |   |   |   |
|--------------------------------------|---|---|---|---|
| <i>Chironius_multiventris</i>        | 1 | 0 | 0 | 0 |
| <i>Chironius_quadricarinatus</i>     | 1 | 0 | 0 | 0 |
| <i>Chironius_scurrulus</i>           | 1 | 0 | 0 | 0 |
| <i>Chlamydosaurus_kingii</i>         | 1 | 0 | 0 | 0 |
| <i>Chondrodactylus_angulifer</i>     | 1 | 1 | 0 | 0 |
| <i>Chondrodactylus_bibronii</i>      | 1 | 1 | 0 | 0 |
| <i>Chondrodactylus_fitzsimonsi</i>   | 1 | 1 | 0 | 0 |
| <i>Chondrodactylus_turneri</i>       | 1 | 1 | 0 | 0 |
| <i>Christinus_marmoratus</i>         | 1 | 1 | 0 | 0 |
| <i>Chrysopelea_ornata</i>            | 1 | 0 | 0 | 0 |
| <i>Chrysopelea_paradisi</i>          | 1 | 0 | 0 | 0 |
| <i>Chrysopelea_taprobanica</i>       | 1 | 0 | 0 | 0 |
| <i>Clelia_bicolor</i>                | 1 | 0 | 0 | 0 |
| <i>Clelia_clelia</i>                 | 1 | 0 | 0 | 0 |
| <i>Clelia_rustica</i>                | 1 | 0 | 0 | 0 |
| <i>Clonophis_kirtlandii</i>          | 0 | 0 | 0 | 0 |
| <i>Cnemaspis_africana</i>            | 1 | 1 | 0 | 0 |
| <i>Cnemaspis_dickersonae</i>         | - | 1 | 0 | 0 |
| <i>Cnemaspis_kandiana</i>            | 1 | 1 | 0 | 0 |
| <i>Cnemaspis_kendallii</i>           | 1 | 1 | 0 | 0 |
| <i>Cnemaspis_limi</i>                | 1 | 1 | 0 | 0 |
| <i>Cnemaspis_podihuna</i>            | 1 | 1 | 0 | 0 |
| <i>Cnemaspis_tropidogaster</i>       | 1 | 1 | 0 | 0 |
| <i>Cnemaspis_uzungwae</i>            | 1 | 1 | 0 | 0 |
| <i>Cnemidophorus_arenivagus</i>      | 1 | 0 | 0 | 0 |
| <i>Cnemidophorus_gramivagus</i>      | 1 | 0 | 0 | 0 |
| <i>Cnemidophorus_lacertoides</i>     | 1 | 0 | 0 | 0 |
| <i>Cnemidophorus_lemniscatus</i>     | 1 | 0 | 0 | 0 |
| <i>Cnemidophorus_longicaudus</i>     | 1 | 0 | 0 | 0 |
| <i>Cnemidophorus_ocellifer</i>       | 1 | 0 | 0 | 0 |
| <i>Cnemidophorus_yanzoi</i>          | 1 | 0 | 0 | 0 |
| <i>Coelognathus_erythrurus</i>       | 1 | 0 | 0 | 0 |
| <i>Coelognathus_flavolineatus</i>    | 1 | 0 | 0 | 0 |
| <i>Coelognathus_helena</i>           | 1 | 0 | 0 | 0 |
| <i>Coelognathus_radiatus</i>         | - | 0 | 0 | 0 |
| <i>Coelognathus_subradiatus</i>      | - | 0 | 0 | 0 |
| <i>Coeranoscincus_frontalis</i>      | - | 0 | 0 | 0 |
| <i>Coeranoscincus_reticulatus</i>    | 1 | 0 | 0 | 0 |
| <i>Coggeria_naufragus</i>            | - | 0 | 0 | 0 |
| <i>Coleodactylus_brachystoma</i>     | 1 | 1 | 0 | 0 |
| <i>Coleodactylus_meridionalis</i>    | 1 | 1 | 0 | 0 |
| <i>Coleodactylus_natalensis</i>      | 1 | 1 | 0 | 0 |
| <i>Coleodactylus_septentrionalis</i> | 1 | 1 | 0 | 0 |
| <i>Coleonyx_brevis</i>               | 1 | 0 | 0 | 0 |

|                                    |   |   |   |   |
|------------------------------------|---|---|---|---|
| <i>Coleonyx_elegans</i>            | 1 | 0 | 0 | 0 |
| <i>Coleonyx_mitratus</i>           | 1 | 0 | 0 | 0 |
| <i>Coleonyx_variegatus</i>         | 1 | 0 | 0 | 0 |
| <i>Colobodactylus_dalcyanus</i>    | 1 | 0 | 0 | 0 |
| <i>Colobodactylus_taunayi</i>      | 1 | 0 | 0 | 0 |
| <i>Colobosaura_modesta</i>         | 1 | 0 | 0 | 0 |
| <i>Colobosauroides_cearensis</i>   | 1 | 0 | 0 | 0 |
| <i>Coloptychon_rhombifer</i>       | 1 | 0 | 0 | 0 |
| <i>Colopus_kochii</i>              | 1 | 1 | 0 | 0 |
| <i>Colopus_wahlbergii</i>          | 1 | 1 | 0 | 0 |
| <i>Coluber_constrictor</i>         | 1 | 0 | 0 | 0 |
| <i>Coluber_dorri</i>               | 1 | 0 | 0 | 0 |
| <i>Coluber_teniatus</i>            | - | 0 | 0 | 0 |
| <i>Coluber_zebrinus</i>            | 1 | 0 | 0 | 0 |
| <i>Compsophis_albiventris</i>      | 1 | 0 | 0 | 0 |
| <i>Compsophis_boulengeri</i>       | 1 | 0 | 0 | 0 |
| <i>Compsophis_infralineatus</i>    | 1 | 0 | 0 | 0 |
| <i>Compsophis_laphystius</i>       | 1 | 0 | 0 | 0 |
| <i>Coniophanes_fissidens</i>       | 1 | 0 | 0 | 0 |
| <i>Conolophus_pallidus</i>         | 1 | 0 | 0 | 0 |
| <i>Conolophus_subcristatus</i>     | 1 | 0 | 0 | 0 |
| <i>Conophis_lineatus</i>           | 1 | 0 | 0 | 0 |
| <i>Conopsis_biserialis</i>         | 0 | 0 | 0 | 0 |
| <i>Conopsis_nasus</i>              | 0 | 0 | 0 | 0 |
| <i>Contia_tenuis</i>               | 1 | 0 | 0 | 0 |
| <i>Copeoglossum_nigropunctatum</i> | - | 0 | 0 | 0 |
| <i>Cophosaurus_texanus</i>         | 1 | 0 | 0 | 0 |
| <i>Cophotis_ceylanica</i>          | 0 | 0 | 0 | 0 |
| <i>Cophotis_dumbara</i>            | 0 | 0 | 0 | 0 |
| <i>Corallus_annulatus</i>          | 0 | 0 | 0 | 0 |
| <i>Corallus_caninus</i>            | 0 | 0 | 0 | 0 |
| <i>Corallus_hortulanus</i>         | 0 | 0 | 0 | 0 |
| <i>Cordylosaurus_subtesselatus</i> | - | 0 | 0 | 0 |
| <i>Cordylus_aridus</i>             | 0 | 0 | 0 | 0 |
| <i>Cordylus_beraduccii</i>         | 0 | 0 | 0 | 0 |
| <i>Cordylus_cordylus</i>           | 0 | 0 | 0 | 0 |
| <i>Cordylus_imkae</i>              | - | 0 | 0 | 0 |
| <i>Cordylus_jonesii</i>            | 0 | 0 | 0 | 0 |
| <i>Cordylus_macropholis</i>        | 0 | 0 | 0 | 0 |
| <i>Cordylus_mclachlani</i>         | 0 | 0 | 0 | 0 |
| <i>Cordylus_meculae</i>            | 0 | 0 | 0 | 0 |
| <i>Cordylus_minor</i>              | 0 | 0 | 0 | 0 |
| <i>Cordylus_niger</i>              | 0 | 0 | 0 | 0 |
| <i>Cordylus_oelofseni</i>          | 0 | 0 | 0 | 0 |

|                                         |   |   |   |   |
|-----------------------------------------|---|---|---|---|
| <i>Cordylus_rhodesianus</i>             | 0 | 0 | 0 | 0 |
| <i>Cordylus_tasmani</i>                 | 0 | 0 | 0 | 0 |
| <i>Cordylus_tropidosternum</i>          | 0 | 0 | 0 | 0 |
| <i>Cordylus_ukingensis</i>              | 0 | 0 | 0 | 0 |
| <i>Cordylus_vittifer</i>                | 0 | 0 | 0 | 0 |
| <i>Coronella_austriaca</i>              | 0 | 0 | 0 | 0 |
| <i>Coronella_girondica</i>              | 1 | 0 | 0 | 0 |
| <i>Corucia_zebrata</i>                  | 0 | 0 | 0 | 0 |
| <i>Coryphophylax_subcristatus</i>       | 1 | 0 | 0 | 0 |
| <i>Corytophanes_cristatus</i>           | 1 | 0 | 0 | 0 |
| <i>Corytophanes_percarinatus</i>        | 0 | 0 | 0 | 0 |
| <i>Cosymbotus_platyurus</i>             | - | 1 | 0 | 0 |
| <i>Crenadactylus_sp._Carnarvon</i>      | - | 0 | 0 | 0 |
| <i>Crenadactylus_sp._Central_Ranges</i> | - | 0 | 0 | 0 |
| <i>Crenadactylus_sp._Kimberley_D</i>    | - | 0 | 0 | 0 |
| <i>Cricosaura_typica</i>                | 0 | 0 | 0 | 0 |
| <i>Crisantophis_nevermanni</i>          | 1 | 0 | 0 | 0 |
| <i>Crocodylurus_amazonicus</i>          | 1 | 0 | 0 | 0 |
| <i>Crossobamon_orientalis</i>           | 1 | 1 | 0 | 0 |
| <i>Crotalus_adamanteus</i>              | 0 | 0 | 0 | 0 |
| <i>Crotalus_aquilus</i>                 | 0 | 0 | 0 | 0 |
| <i>Crotalus_atrox</i>                   | 0 | 0 | 0 | 0 |
| <i>Crotalus_basiliscus</i>              | 0 | 0 | 0 | 0 |
| <i>Crotalus_catalinensis</i>            | 0 | 0 | 0 | 0 |
| <i>Crotalus_cerastes</i>                | 0 | 0 | 0 | 0 |
| <i>Crotalus_culminatus</i>              | 0 | 0 | 0 | 0 |
| <i>Crotalus_durissus</i>                | 0 | 0 | 0 | 0 |
| <i>Crotalus_enyo</i>                    | 0 | 0 | 0 | 0 |
| <i>Crotalus_horridus</i>                | 0 | 0 | 0 | 0 |
| <i>Crotalus_intermedius</i>             | 0 | 0 | 0 | 0 |
| <i>Crotalus_lepidus</i>                 | 0 | 0 | 0 | 0 |
| <i>Crotalus_mitchellii</i>              | 0 | 0 | 0 | 0 |
| <i>Crotalus_molossus</i>                | 0 | 0 | 0 | 0 |
| <i>Crotalus_oreganus</i>                | 0 | 0 | 0 | 0 |
| <i>Crotalus_polystictus</i>             | 0 | 0 | 0 | 0 |
| <i>Crotalus_pricei</i>                  | 0 | 0 | 0 | 0 |
| <i>Crotalus_pusillus</i>                | 0 | 0 | 0 | 0 |
| <i>Crotalus_ravus</i>                   | 0 | 0 | 0 | 0 |
| <i>Crotalus_ruber</i>                   | 0 | 0 | 0 | 0 |
| <i>Crotalus_scutulatus</i>              | 0 | 0 | 0 | 0 |
| <i>Crotalus_simus</i>                   | 0 | 0 | 0 | 0 |
| <i>Crotalus_tancitarensis</i>           | 0 | 0 | 0 | 0 |
| <i>Crotalus_tigris</i>                  | 0 | 0 | 0 | 0 |
| <i>Crotalus_tortugensis</i>             | 0 | 0 | 0 | 0 |

|                                        |   |   |   |   |
|----------------------------------------|---|---|---|---|
| <i>Crotalus_totonacus</i>              | 0 | 0 | 0 | 0 |
| <i>Crotalus_transversus</i>            | 0 | 0 | 0 | 0 |
| <i>Crotalus_triseriatus</i>            | 0 | 0 | 0 | 0 |
| <i>Crotalus_tzabcan</i>                | 0 | 0 | 0 | 0 |
| <i>Crotalus_viridis</i>                | 0 | 0 | 0 | 0 |
| <i>Crotalus_willardi</i>               | 0 | 0 | 0 | 0 |
| <i>Crotaphopeltis_tornieri</i>         | 1 | 0 | 0 | 0 |
| <i>Crotaphytus_antiquus</i>            | 1 | 0 | 0 | 0 |
| <i>Crotaphytus_bicinctores</i>         | 1 | 0 | 0 | 0 |
| <i>Crotaphytus_collaris</i>            | 1 | 0 | 0 | 0 |
| <i>Crotaphytus_grismeri</i>            | 1 | 0 | 0 | 0 |
| <i>Crotaphytus_insularis</i>           | 1 | 0 | 0 | 0 |
| <i>Crotaphytus_nebrius</i>             | 1 | 0 | 0 | 0 |
| <i>Crotaphytus_reticulatus</i>         | 1 | 0 | 0 | 0 |
| <i>Crotaphytus_vestigium</i>           | 1 | 0 | 0 | 0 |
| <i>Cryophis_hallbergi</i>              | 1 | 0 | 0 | 0 |
| <i>Cryptactites_peringueyi</i>         | 1 | 1 | 0 | 0 |
| <i>Cryptelytrops_andersonii</i>        | 0 | 0 | 0 | 0 |
| <i>Cryptelytrops_cantori</i>           | 0 | 0 | 0 | 0 |
| <i>Cryptelytrops_erythrurus</i>        | 0 | 0 | 0 | 0 |
| <i>Cryptelytrops_fasciatus</i>         | 0 | 0 | 0 | 0 |
| <i>Cryptelytrops_kanburiensis</i>      | 0 | 0 | 0 | 0 |
| <i>Cryptelytrops_macrops</i>           | 0 | 0 | 0 | 0 |
| <i>Cryptelytrops_purpureomaculatus</i> | 0 | 0 | 0 | 0 |
| <i>Cryptelytrops_venustus</i>          | 0 | 0 | 0 | 0 |
| <i>Cryptoblepharus_boutonii</i>        | 1 | 0 | 0 | 0 |
| <i>Cryptoblepharus_nigropunctatus</i>  | 1 | 0 | 0 | 0 |
| <i>Cryptoblepharus_novocaledonicus</i> | 1 | 0 | 0 | 0 |
| <i>Cryptophis_nigrescens</i>           | - | 0 | 0 | 0 |
| <i>Ctenoblepharys_adpersa</i>          | 1 | 0 | 0 | 0 |
| <i>Ctenophorus_adelaidensis</i>        | 1 | 0 | 0 | 0 |
| <i>Ctenophorus_caudicinctus</i>        | 1 | 0 | 0 | 0 |
| <i>Ctenophorus_clayi</i>               | 1 | 0 | 0 | 0 |
| <i>Ctenophorus_cristatus</i>           | 1 | 0 | 0 | 0 |
| <i>Ctenophorus_decrezii</i>            | 1 | 0 | 0 | 0 |
| <i>Ctenophorus_femoralis</i>           | 1 | 0 | 0 | 0 |
| <i>Ctenophorus_fionni</i>              | 1 | 0 | 0 | 0 |
| <i>Ctenophorus_fordi</i>               | 1 | 0 | 0 | 0 |
| <i>Ctenophorus_gibba</i>               | 1 | 0 | 0 | 0 |
| <i>Ctenophorus_isolepis</i>            | 1 | 0 | 0 | 0 |
| <i>Ctenophorus_maculatus</i>           | 1 | 0 | 0 | 0 |
| <i>Ctenophorus_maculosus</i>           | 1 | 0 | 0 | 0 |
| <i>Ctenophorus_mckenziei</i>           | 1 | 0 | 0 | 0 |
| <i>Ctenophorus_nuchalis</i>            | 1 | 0 | 0 | 0 |



|                                   |   |   |   |   |
|-----------------------------------|---|---|---|---|
| <i>Ctenophorus_ornatus</i>        | 1 | 0 | 0 | 0 |
| <i>Ctenophorus_pictus</i>         | 1 | 0 | 0 | 0 |
| <i>Ctenophorus_reticulatus</i>    | 1 | 0 | 0 | 0 |
| <i>Ctenophorus_rufescens</i>      | 1 | 0 | 0 | 0 |
| <i>Ctenophorus_salinarum</i>      | 1 | 0 | 0 | 0 |
| <i>Ctenophorus_scutulatus</i>     | 1 | 0 | 0 | 0 |
| <i>Ctenophorus_tjantjalka</i>     | 1 | 0 | 0 | 0 |
| <i>Ctenophorus_vadnappa</i>       | 1 | 0 | 0 | 0 |
| <i>Ctenosaura_acanthura</i>       | 1 | 0 | 0 | 0 |
| <i>Ctenosaura_bakeri</i>          | 1 | 0 | 0 | 0 |
| <i>Ctenosaura_flavidorsalis</i>   | 1 | 0 | 0 | 0 |
| <i>Ctenosaura_hemilopha</i>       | 1 | 0 | 0 | 0 |
| <i>Ctenosaura_melanosterna</i>    | 1 | 0 | 0 | 0 |
| <i>Ctenosaura_oaxacana</i>        | 1 | 0 | 0 | 0 |
| <i>Ctenosaura_oedirhina</i>       | 1 | 0 | 0 | 0 |
| <i>Ctenosaura_palearis</i>        | 1 | 0 | 0 | 0 |
| <i>Ctenosaura_pectinata</i>       | 1 | 0 | 0 | 0 |
| <i>Ctenosaura_quinquecarinata</i> | 1 | 0 | 0 | 0 |
| <i>Ctenosaura_similis</i>         | 1 | 0 | 0 | 0 |
| <i>Ctenotus_angusticeps</i>       | 1 | 0 | 0 | 0 |
| <i>Ctenotus_astarte</i>           | 1 | 0 | 0 | 0 |
| <i>Ctenotus_atlas</i>             | 1 | 0 | 0 | 0 |
| <i>Ctenotus_australis</i>         | 1 | 0 | 0 | 0 |
| <i>Ctenotus_brooksi</i>           | 1 | 0 | 0 | 0 |
| <i>Ctenotus_calurus</i>           | 1 | 0 | 0 | 0 |
| <i>Ctenotus_essingtonii</i>       | 1 | 0 | 0 | 0 |
| <i>Ctenotus_fallens</i>           | 1 | 0 | 0 | 0 |
| <i>Ctenotus_gagudju</i>           | 1 | 0 | 0 | 0 |
| <i>Ctenotus_grandis</i>           | 1 | 0 | 0 | 0 |
| <i>Ctenotus_greeri</i>            | 1 | 0 | 0 | 0 |
| <i>Ctenotus_hanloni</i>           | 1 | 0 | 0 | 0 |
| <i>Ctenotus_hebetior</i>          | 1 | 0 | 0 | 0 |
| <i>Ctenotus_hilli</i>             | 1 | 0 | 0 | 0 |
| <i>Ctenotus_inornatus</i>         | 1 | 0 | 0 | 0 |
| <i>Ctenotus_labillardieri</i>     | 1 | 0 | 0 | 0 |
| <i>Ctenotus_leae</i>              | 1 | 0 | 0 | 0 |
| <i>Ctenotus_leonhardii</i>        | 1 | 0 | 0 | 0 |
| <i>Ctenotus_maryani</i>           | 1 | 0 | 0 | 0 |
| <i>Ctenotus_mimetes</i>           | 1 | 0 | 0 | 0 |
| <i>Ctenotus_nasutus</i>           | 1 | 0 | 0 | 0 |
| <i>Ctenotus_olympicus</i>         | 1 | 0 | 0 | 0 |
| <i>Ctenotus_pantherinus</i>       | 1 | 0 | 0 | 0 |
| <i>Ctenotus_piankai</i>           | 1 | 0 | 0 | 0 |
| <i>Ctenotus_pulchellus</i>        | 1 | 0 | 0 | 0 |

|                                       |   |   |   |   |
|---------------------------------------|---|---|---|---|
| <i>Ctenotus_quattuordecimlineatus</i> | 1 | 0 | 0 | 0 |
| <i>Ctenotus_rawlinsoni</i>            | 1 | 0 | 0 | 0 |
| <i>Ctenotus_regius</i>                | 1 | 0 | 0 | 0 |
| <i>Ctenotus_robustus</i>              | 1 | 0 | 0 | 0 |
| <i>Ctenotus_rubicundus</i>            | 1 | 0 | 0 | 0 |
| <i>Ctenotus_rutilans</i>              | 1 | 0 | 0 | 0 |
| <i>Ctenotus_saxatilis</i>             | 1 | 0 | 0 | 0 |
| <i>Ctenotus_schomburgkii</i>          | 1 | 0 | 0 | 0 |
| <i>Ctenotus_septenarius</i>           | 1 | 0 | 0 | 0 |
| <i>Ctenotus_serventyi</i>             | 1 | 0 | 0 | 0 |
| <i>Ctenotus_spaldingi</i>             | 1 | 0 | 0 | 0 |
| <i>Ctenotus_strauchii</i>             | 1 | 0 | 0 | 0 |
| <i>Ctenotus_taeniolatus</i>           | 1 | 0 | 0 | 0 |
| <i>Ctenotus_tanamiensis</i>           | 1 | 0 | 0 | 0 |
| <i>Ctenotus_uber</i>                  | 1 | 0 | 0 | 0 |
| <i>Ctenotus_youngsoni</i>             | 1 | 0 | 0 | 0 |
| <i>Cubophis_vudii</i>                 | - | 0 | 0 | 0 |
| <i>Cyclodomorphus_branchialis</i>     | 0 | 0 | 0 | 0 |
| <i>Cyclodomorphus_casuarinae</i>      | 0 | 0 | 0 | 0 |
| <i>Cyclodomorphus_michaeli</i>        | 0 | 0 | 0 | 0 |
| <i>Cyclophiops_major</i>              | 1 | 0 | 0 | 0 |
| <i>Cyclura_carinata</i>               | 1 | 0 | 0 | 0 |
| <i>Cyclura_collei</i>                 | 1 | 0 | 0 | 0 |
| <i>Cyclura_cornuta</i>                | 1 | 0 | 0 | 0 |
| <i>Cyclura_cyclura</i>                | 1 | 0 | 0 | 0 |
| <i>Cyclura_nubila</i>                 | 1 | 0 | 0 | 0 |
| <i>Cyclura_pinguis</i>                | 1 | 0 | 0 | 0 |
| <i>Cyclura_ricordi</i>                | 1 | 0 | 0 | 0 |
| <i>Cyclura_rileyi</i>                 | 1 | 0 | 0 | 0 |
| <i>Cylindrophis_maculatus</i>         | 0 | 0 | 0 | 0 |
| <i>Cylindrophis_ruffus</i>            | 0 | 0 | 0 | 0 |
| <i>Cynisca_leucura</i>                | 1 | 0 | 0 | 0 |
| <i>Cyrtodactylus_agusanensis</i>      | 1 | 1 | 0 | 0 |
| <i>Cyrtodactylus_angularis</i>        | 1 | 1 | 0 | 0 |
| <i>Cyrtodactylus_annulatus</i>        | 1 | 1 | 0 | 0 |
| <i>Cyrtodactylus_ayeyarwadyensis</i>  | 1 | 1 | 0 | 0 |
| <i>Cyrtodactylus_baluensis</i>        | 1 | 1 | 0 | 0 |
| <i>Cyrtodactylus_consobrinus</i>      | 1 | 1 | 0 | 0 |
| <i>Cyrtodactylus_epiroticus</i>       | 1 | 1 | 0 | 0 |
| <i>Cyrtodactylus_intermedius</i>      | 1 | 1 | 0 | 0 |
| <i>Cyrtodactylus_irregularis</i>      | 1 | 1 | 0 | 0 |
| <i>Cyrtodactylus_jarujini</i>         | 1 | 1 | 0 | 0 |
| <i>Cyrtodactylus_klugei</i>           | 1 | 1 | 0 | 0 |
| <i>Cyrtodactylus_loriae</i>           | 1 | 1 | 0 | 0 |

|                                     |   |   |   |   |
|-------------------------------------|---|---|---|---|
| <i>Cyrtodactylus_louisiadensis</i>  | 1 | 1 | 0 | 0 |
| <i>Cyrtodactylus_marmoratus</i>     | 1 | 1 | 0 | 0 |
| <i>Cyrtodactylus_novaeguineae</i>   | 1 | 1 | 0 | 0 |
| <i>Cyrtodactylus_oldhami</i>        | 1 | 1 | 0 | 0 |
| <i>Cyrtodactylus_philippinicus</i>  | 1 | 1 | 0 | 0 |
| <i>Cyrtodactylus_pulchellus</i>     | 1 | 1 | 0 | 0 |
| <i>Cyrtodactylus_quadrivirgatus</i> | 1 | 1 | 0 | 0 |
| <i>Cyrtodactylus_robustus</i>       | 1 | 1 | 0 | 0 |
| <i>Cyrtodactylus_sermowaiensis</i>  | 1 | 1 | 0 | 0 |
| <i>Cyrtodactylus_tiomanensis</i>    | 1 | 1 | 0 | 0 |
| <i>Cyrtodactylus_tripartitus</i>    | 1 | 1 | 0 | 0 |
| <i>Cyrtodactylus_tuberculatus</i>   | 1 | 1 | 0 | 0 |
| <i>Cyrtopodion_agamuroides</i>      | 1 | 1 | 0 | 0 |
| <i>Cyrtopodion_caspium</i>          | 1 | 1 | 0 | 0 |
| <i>Cyrtopodion_gastrophole</i>      | 1 | 1 | 0 | 0 |
| <i>Cyrtopodion_heterocercum</i>     | 1 | 1 | 0 | 0 |
| <i>Cyrtopodion_kotschyi</i>         | 1 | 1 | 0 | 0 |
| <i>Cyrtopodion_longipes</i>         | 1 | 1 | 0 | 0 |
| <i>Cyrtopodion_sagittiferum</i>     | 1 | 1 | 0 | 0 |
| <i>Cyrtopodion_scabrum</i>          | 1 | 1 | 0 | 0 |
| <i>Cyrtopodion_sistanensis</i>      | 1 | 1 | 0 | 0 |
| <i>Daboia_palaestinae</i>           | - | 0 | 0 | 0 |
| <i>Daboia_russellii</i>             | - | 0 | 0 | 0 |
| <i>Dactyloa_casildae</i>            | - | 0 | 0 | 0 |
| <i>Dactyloa_frenata</i>             | - | 0 | 0 | 0 |
| <i>Dactyloa_insignis</i>            | - | 0 | 0 | 0 |
| <i>Dactyloa_microtus</i>            | - | 0 | 0 | 0 |
| <i>Dalmatolacerta_oxycephala</i>    | 1 | 0 | 0 | 0 |
| <i>Darevskia_alpina</i>             | 1 | 0 | 0 | 0 |
| <i>Darevskia_armeniaca</i>          | 1 | 0 | 0 | 0 |
| <i>Darevskia_brauneri</i>           | 1 | 0 | 0 | 0 |
| <i>Darevskia_caucasica</i>          | 1 | 0 | 0 | 0 |
| <i>Darevskia_chlorogaster</i>       | 1 | 0 | 0 | 0 |
| <i>Darevskia_clarkorum</i>          | 1 | 0 | 0 | 0 |
| <i>Darevskia_daghestanica</i>       | 1 | 0 | 0 | 0 |
| <i>Darevskia_derjugini</i>          | 1 | 0 | 0 | 0 |
| <i>Darevskia_lindholmi</i>          | 1 | 0 | 0 | 0 |
| <i>Darevskia_mixta</i>              | 1 | 0 | 0 | 0 |
| <i>Darevskia_parvula</i>            | 1 | 0 | 0 | 0 |
| <i>Darevskia_portschinskii</i>      | 1 | 0 | 0 | 0 |
| <i>Darevskia_praticola</i>          | 1 | 0 | 0 | 0 |
| <i>Darevskia_raddei</i>             | 1 | 0 | 0 | 0 |
| <i>Darevskia_rostombekovi</i>       | 1 | 0 | 0 | 0 |
| <i>Darevskia_rudis</i>              | 1 | 0 | 0 | 0 |

|                                     |   |   |   |   |
|-------------------------------------|---|---|---|---|
| <i>Darevskia_saxicola</i>           | 1 | 0 | 0 | 0 |
| <i>Darevskia_valentini</i>          | 1 | 0 | 0 | 0 |
| <i>Darlingtonia_haetiana</i>        | 1 | 0 | 0 | 0 |
| <i>Dasia_grisea</i>                 | 1 | 0 | 0 | 0 |
| <i>Dasia_olivacea</i>               | 1 | 0 | 0 | 0 |
| <i>Dasia_vittata</i>                | - | 0 | 0 | 0 |
| <i>Dasypeltis_atra</i>              | 1 | 0 | 0 | 0 |
| <i>Dasypeltis_confusa</i>           | 1 | 0 | 0 | 0 |
| <i>Dasypeltis_fasciata</i>          | 1 | 0 | 0 | 0 |
| <i>Dasypeltis_gansi</i>             | 1 | 0 | 0 | 0 |
| <i>Dasypeltis_sahelensis</i>        | 1 | 0 | 0 | 0 |
| <i>Dasypeltis_scabra</i>            | 1 | 0 | 0 | 0 |
| <i>Deinagkistrodon_acutus</i>       | 1 | 0 | 0 | 0 |
| <i>Delma_australis</i>              | 1 | 0 | 0 | 0 |
| <i>Delma_borea</i>                  | 1 | 0 | 0 | 0 |
| <i>Delma_butleri</i>                | 1 | 0 | 0 | 0 |
| <i>Delma_concinna</i>               | 1 | 0 | 0 | 0 |
| <i>Delma_fraseri</i>                | 1 | 0 | 0 | 0 |
| <i>Delma_grayii</i>                 | 1 | 0 | 0 | 0 |
| <i>Delma_impar</i>                  | 1 | 0 | 0 | 0 |
| <i>Delma_inornata</i>               | 1 | 0 | 0 | 0 |
| <i>Delma_labialis</i>               | 1 | 0 | 0 | 0 |
| <i>Delma_mitella</i>                | 1 | 0 | 0 | 0 |
| <i>Delma_molleri</i>                | 1 | 0 | 0 | 0 |
| <i>Delma_nasuta</i>                 | 1 | 0 | 0 | 0 |
| <i>Delma_pax</i>                    | 1 | 0 | 0 | 0 |
| <i>Delma_petersoni</i>              | - | 0 | 0 | 0 |
| <i>Delma_tincta</i>                 | 1 | 0 | 0 | 0 |
| <i>Delma_torquata</i>               | 1 | 0 | 0 | 0 |
| <i>Demansia_papuensis</i>           | 1 | 0 | 0 | 0 |
| <i>Demansia_psammophis</i>          | 1 | 0 | 0 | 0 |
| <i>Demansia_vestigiata</i>          | 1 | 0 | 0 | 0 |
| <i>Dendrelaphis_bifrenalis</i>      | 1 | 0 | 0 | 0 |
| <i>Dendrelaphis_caudolineatus</i>   | 1 | 0 | 0 | 0 |
| <i>Dendrelaphis_caudolineolatus</i> | 1 | 0 | 0 | 0 |
| <i>Dendrelaphis_schokari</i>        | 1 | 0 | 0 | 0 |
| <i>Dendrelaphis_tristis</i>         | 1 | 0 | 0 | 0 |
| <i>Dendroaspis_angusticeps</i>      | 1 | 0 | 0 | 0 |
| <i>Dendroaspis_polylepis</i>        | 1 | 0 | 0 | 0 |
| <i>Dendrophidion_dendrophis</i>     | 1 | 0 | 0 | 0 |
| <i>Dendrophidion_percarinatus</i>   | 1 | 0 | 0 | 0 |
| <i>Denisonia_devisi</i>             | 0 | 0 | 0 | 0 |
| <i>Diadophis_punctatus</i>          | 1 | 0 | 0 | 0 |
| <i>Dibamus_bourreti</i>             | 1 | 1 | 0 | 0 |

|                                      |   |   |   |   |
|--------------------------------------|---|---|---|---|
| <i>Dibamus_celebensis</i>            | 1 | 1 | 0 | 0 |
| <i>Dibamus_greeri</i>                | 1 | 1 | 0 | 0 |
| <i>Dibamus_montanus</i>              | 1 | 1 | 0 | 0 |
| <i>Dibamus_novaeguineae</i>          | 1 | 1 | 0 | 0 |
| <i>Dibamus_seramensis</i>            | 1 | 1 | 0 | 0 |
| <i>Dibamus_tioanensis</i>            | 1 | 1 | 0 | 0 |
| <i>Dicrodon_guttulatum</i>           | 1 | 0 | 0 | 0 |
| <i>Dierogekko_inexpectatus</i>       | 1 | 0 | 0 | 0 |
| <i>Dierogekko_insularis</i>          | 1 | 0 | 0 | 0 |
| <i>Dierogekko_kaalaensis</i>         | 1 | 0 | 0 | 0 |
| <i>Dierogekko_koniambo</i>           | 1 | 0 | 0 | 0 |
| <i>Dierogekko_nehoueensis</i>        | 1 | 0 | 0 | 0 |
| <i>Dierogekko_poumensis</i>          | 1 | 0 | 0 | 0 |
| <i>Dierogekko_thomaswhitei</i>       | 1 | 0 | 0 | 0 |
| <i>Dierogekko_validiclavis</i>       | 1 | 0 | 0 | 0 |
| <i>Dinarolacerta_montenegrina</i>    | 1 | 0 | 0 | 0 |
| <i>Dinarolacerta_mosorensis</i>      | 1 | 0 | 0 | 0 |
| <i>Dinodon_rufozonatum</i>           | 1 | 0 | 0 | 0 |
| <i>Dinodon_semicarinatus</i>         | - | 0 | 0 | 0 |
| <i>Diplodactylus_assimilis</i>       | - | 0 | 0 | 0 |
| <i>Diplodactylus_capensis</i>        | 1 | 0 | 0 | 0 |
| <i>Diplodactylus_cf_granariensis</i> | - | 0 | 0 | 0 |
| <i>Diplodactylus_conspicillatus</i>  | 1 | 0 | 0 | 0 |
| <i>Diplodactylus_fulleri</i>         | 1 | 0 | 0 | 0 |
| <i>Diplodactylus_galeatus</i>        | 1 | 0 | 0 | 0 |
| <i>Diplodactylus_granariensis</i>    | 1 | 0 | 0 | 0 |
| <i>Diplodactylus_intermedius</i>     | - | 0 | 0 | 0 |
| <i>Diplodactylus_klugei</i>          | 1 | 0 | 0 | 0 |
| <i>Diplodactylus_mitchelli</i>       | 1 | 0 | 0 | 0 |
| <i>Diplodactylus_ornatus</i>         | 1 | 0 | 0 | 0 |
| <i>Diplodactylus_polyophthalmus</i>  | 1 | 0 | 0 | 0 |
| <i>Diplodactylus_pulcher</i>         | 1 | 0 | 0 | 0 |
| <i>Diplodactylus_savagei</i>         | 1 | 0 | 0 | 0 |
| <i>Diplodactylus_tessellatus</i>     | 1 | 0 | 0 | 0 |
| <i>Diplodactylus_vittatus</i>        | 1 | 0 | 0 | 0 |
| <i>Diploglossus_bilobatus</i>        | 1 | 0 | 0 | 0 |
| <i>Diploglossus_pleei</i>            | - | 0 | 0 | 0 |
| <i>Diplolaemus_darwini</i>           | 1 | 0 | 0 | 0 |
| <i>Diplometopon_zarudnyi</i>         | 1 | 0 | 0 | 0 |
| <i>Diporiphora_albilabris</i>        | 1 | 0 | 0 | 0 |
| <i>Diporiphora_arnhemica</i>         | 1 | 0 | 0 | 0 |
| <i>Diporiphora_australis</i>         | 1 | 0 | 0 | 0 |
| <i>Diporiphora_bennettii</i>         | 1 | 0 | 0 | 0 |
| <i>Diporiphora_bilineata</i>         | 1 | 0 | 0 | 0 |

|                               |   |   |   |   |
|-------------------------------|---|---|---|---|
| <i>Diporiphora_lalliae</i>    | 1 | 0 | 0 | 0 |
| <i>Diporiphora_linga</i>      | 1 | 0 | 0 | 0 |
| <i>Diporiphora_magna</i>      | 1 | 0 | 0 | 0 |
| <i>Diporiphora_nobbi</i>      | - | 0 | 0 | 0 |
| <i>Diporiphora_pindan</i>     | 1 | 0 | 0 | 0 |
| <i>Diporiphora_reginae</i>    | 1 | 0 | 0 | 0 |
| <i>Diporiphora_superba</i>    | 1 | 0 | 0 | 0 |
| <i>Diporiphora_valens</i>     | 1 | 0 | 0 | 0 |
| <i>Diporiphora_winneckeii</i> | 1 | 0 | 0 | 0 |
| <i>Dipsadoboa_unicolor</i>    | 1 | 0 | 0 | 0 |
| <i>Dipsas_catesbyi</i>        | 1 | 0 | 0 | 0 |
| <i>Dipsas_indica</i>          | 1 | 0 | 0 | 0 |
| <i>Dipsas_neivai</i>          | 1 | 0 | 0 | 0 |
| <i>Dipsas_pratti</i>          | 1 | 0 | 0 | 0 |
| <i>Dipsas_variegata</i>       | 1 | 0 | 0 | 0 |
| <i>Dipsina_multimaculata</i>  | 1 | 0 | 0 | 0 |
| <i>Dipsosaurus_dorsalis</i>   | 1 | 0 | 0 | 0 |
| <i>Dispholidus_typus</i>      | 1 | 0 | 0 | 0 |
| <i>Disteira_kingii</i>        | 0 | 0 | 0 | 0 |
| <i>Disteira_major</i>         | 0 | 0 | 0 | 0 |
| <i>Dityopphis_vivax</i>       | 1 | 0 | 0 | 0 |
| <i>Dixonius_melanostictus</i> | 1 | 1 | 0 | 0 |
| <i>Dixonius_siamensis</i>     | 1 | 1 | 0 | 0 |
| <i>Dixonius_vietnamensis</i>  | 1 | 1 | 0 | 0 |
| <i>Dolichophis_caspius</i>    | 1 | 0 | 0 | 0 |
| <i>Dracaena_guianensis</i>    | 1 | 0 | 0 | 0 |
| <i>Draco_beccarii</i>         | 1 | 0 | 0 | 0 |
| <i>Draco_biaro</i>            | 1 | 0 | 0 | 0 |
| <i>Draco_bimaculatus</i>      | 1 | 0 | 0 | 0 |
| <i>Draco_blanfordii</i>       | 1 | 0 | 0 | 0 |
| <i>Draco_boschmai</i>         | 1 | 0 | 0 | 0 |
| <i>Draco_bourouniensis</i>    | 1 | 0 | 0 | 0 |
| <i>Draco_caerhulians</i>      | - | 0 | 0 | 0 |
| <i>Draco_cornutus</i>         | 1 | 0 | 0 | 0 |
| <i>Draco_cristatellus</i>     | 1 | 0 | 0 | 0 |
| <i>Draco_cyanopterus</i>      | 1 | 0 | 0 | 0 |
| <i>Draco_dussumieri</i>       | 1 | 0 | 0 | 0 |
| <i>Draco_fimbriatus</i>       | 1 | 0 | 0 | 0 |
| <i>Draco_guentheri</i>        | 1 | 0 | 0 | 0 |
| <i>Draco_haematopogon</i>     | 1 | 0 | 0 | 0 |
| <i>Draco_indochinensis</i>    | 1 | 0 | 0 | 0 |
| <i>Draco_lineatus</i>         | 1 | 0 | 0 | 0 |
| <i>Draco_maculatus</i>        | 1 | 0 | 0 | 0 |
| <i>Draco_maximus</i>          | 1 | 0 | 0 | 0 |

|                                     |   |   |   |   |
|-------------------------------------|---|---|---|---|
| <i>Draco_melanopogon</i>            | 1 | 0 | 0 | 0 |
| <i>Draco_mindanensis</i>            | 1 | 0 | 0 | 0 |
| <i>Draco_obscurus</i>               | 1 | 0 | 0 | 0 |
| <i>Draco_ornatus</i>                | 1 | 0 | 0 | 0 |
| <i>Draco_palawanensis</i>           | 1 | 0 | 0 | 0 |
| <i>Draco_quadrasei</i>              | 1 | 0 | 0 | 0 |
| <i>Draco_quinquefasciatus</i>       | 1 | 0 | 0 | 0 |
| <i>Draco_reticulatus</i>            | 1 | 0 | 0 | 0 |
| <i>Draco_rhytisma</i>               | 1 | 0 | 0 | 0 |
| <i>Draco_spilonotus</i>             | 1 | 0 | 0 | 0 |
| <i>Draco_spilopterus</i>            | 1 | 0 | 0 | 0 |
| <i>Draco_taeniopterus</i>           | 1 | 0 | 0 | 0 |
| <i>Draco_timoriensis</i>            | - | 0 | 0 | 0 |
| <i>Draco_volans</i>                 | 1 | 0 | 0 | 0 |
| <i>Drepanoides_anomalus</i>         | 1 | 0 | 0 | 0 |
| <i>Dromicodryas_bernieri</i>        | 1 | 0 | 0 | 0 |
| <i>Dromicodryas_quadri-lineatus</i> | 1 | 0 | 0 | 0 |
| <i>Drymarchon_corais</i>            | 1 | 0 | 0 | 0 |
| <i>Drymobius_rhombifer</i>          | 1 | 0 | 0 | 0 |
| <i>Drymoluber_brazili</i>           | 1 | 0 | 0 | 0 |
| <i>Drymoluber_dichrous</i>          | 1 | 0 | 0 | 0 |
| <i>Dryocalamus_nympha</i>           | 1 | 0 | 0 | 0 |
| <i>Drysdalia_coronoides</i>         | 0 | 0 | 0 | 0 |
| <i>Drysdalia_mastersii</i>          | 0 | 0 | 0 | 0 |
| <i>Drysdalia_rhodogaster</i>        | 0 | 0 | 0 | 0 |
| <i>Duberria_lutrix</i>              | 0 | 0 | 0 | 0 |
| <i>Duberria_variegata</i>           | 0 | 0 | 0 | 0 |
| <i>Ebenavia_inunguis</i>            | 1 | 1 | 0 | 0 |
| <i>Echinanthera_melanostigma</i>    | 1 | 0 | 0 | 0 |
| <i>Echiopsis_atriceps</i>           | 0 | 0 | 0 | 0 |
| <i>Echiopsis_curta</i>              | 0 | 0 | 0 | 0 |
| <i>Echis_carinatus</i>              | - | 0 | 0 | 0 |
| <i>Echis_coloratus</i>              | 1 | 0 | 0 | 0 |
| <i>Echis_jogeri</i>                 | 1 | 0 | 0 | 0 |
| <i>Echis_leucogaster</i>            | 1 | 0 | 0 | 0 |
| <i>Echis_ocellatus</i>              | 1 | 0 | 0 | 0 |
| <i>Echis_omanensis</i>              | 1 | 0 | 0 | 0 |
| <i>Echis_pyramidum</i>              | 1 | 0 | 0 | 0 |
| <i>Ecleopus_gaudichaudii</i>        | 1 | 0 | 0 | 0 |
| <i>Egernia_depressa</i>             | 0 | 0 | 0 | 0 |
| <i>Egernia_guthaga</i>              | 0 | 0 | 0 | 0 |
| <i>Egernia_hosmeri</i>              | 0 | 0 | 0 | 0 |
| <i>Egernia_inornata</i>             | 0 | 0 | 0 | 0 |
| <i>Egernia_kingii</i>               | 0 | 0 | 0 | 0 |

|                                     |   |   |   |   |
|-------------------------------------|---|---|---|---|
| <i>Egernia_kintorei</i>             | 0 | 0 | 0 | 0 |
| <i>Egernia_luctuosa</i>             | 0 | 0 | 0 | 0 |
| <i>Egernia_margaretae</i>           | 0 | 0 | 0 | 0 |
| <i>Egernia_modesta</i>              | 0 | 0 | 0 | 0 |
| <i>Egernia_montana</i>              | 0 | 0 | 0 | 0 |
| <i>Egernia_multiscutata</i>         | 0 | 0 | 0 | 0 |
| <i>Egernia_napoleonis</i>           | 0 | 0 | 0 | 0 |
| <i>Egernia_pulchra</i>              | 0 | 0 | 0 | 0 |
| <i>Egernia_richardi</i>             | 0 | 0 | 0 | 0 |
| <i>Egernia_saxatilis</i>            | 0 | 0 | 0 | 0 |
| <i>Egernia_stokesii</i>             | 0 | 0 | 0 | 0 |
| <i>Egernia_whitii</i>               | 0 | 0 | 0 | 0 |
| <i>Eirenis_aurolineatus</i>         | 1 | 0 | 0 | 0 |
| <i>Eirenis_barani</i>               | 1 | 0 | 0 | 0 |
| <i>Eirenis_collaris</i>             | 1 | 0 | 0 | 0 |
| <i>Eirenis_coronelloides</i>        | 1 | 0 | 0 | 0 |
| <i>Eirenis_decemlineata</i>         | - | 0 | 0 | 0 |
| <i>Eirenis_eiselti</i>              | 1 | 0 | 0 | 0 |
| <i>Eirenis_levantinus</i>           | 1 | 0 | 0 | 0 |
| <i>Eirenis_lineomaculata</i>        | - | 0 | 0 | 0 |
| <i>Eirenis_medus</i>                | 1 | 0 | 0 | 0 |
| <i>Eirenis_modestus</i>             | 1 | 0 | 0 | 0 |
| <i>Eirenis_persicus</i>             | - | 0 | 0 | 0 |
| <i>Eirenis_punctatolineatus</i>     | 1 | 0 | 0 | 0 |
| <i>Eirenis_rothi</i>                | - | 0 | 0 | 0 |
| <i>Eirenis_thospitis</i>            | 1 | 0 | 0 | 0 |
| <i>Elaphe_bella</i>                 | - | 0 | 0 | 0 |
| <i>Elaphe_bimaculata</i>            | 1 | 0 | 0 | 0 |
| <i>Elaphe_carinata</i>              | 1 | 0 | 0 | 0 |
| <i>Elaphe_climacophora</i>          | 1 | 0 | 0 | 0 |
| <i>Elaphe_davidi</i>                | 1 | 0 | 0 | 0 |
| <i>Elaphe_dione</i>                 | 1 | 0 | 0 | 0 |
| <i>Elaphe_quadrivirgata</i>         | 1 | 0 | 0 | 0 |
| <i>Elaphe_quatuorlineata</i>        | 1 | 0 | 0 | 0 |
| <i>Elaphe_sauromates</i>            | 1 | 0 | 0 | 0 |
| <i>Elaphe_schrenckii</i>            | 1 | 0 | 0 | 0 |
| <i>Elapognathus_coronata</i>        | 0 | 0 | 0 | 0 |
| <i>Elapomorphus_quinquelineatus</i> | 1 | 0 | 0 | 0 |
| <i>Elapsoidea_nigra</i>             | 1 | 0 | 0 | 0 |
| <i>Elapsoidea_semiannulata</i>      | 1 | 0 | 0 | 0 |
| <i>Elapsoidea_sundevallii</i>       | 1 | 0 | 0 | 0 |
| <i>Elasmodactylus_tetensis</i>      | 1 | 1 | 0 | 0 |
| <i>Elasmodactylus_tuberculosis</i>  | 1 | 1 | 0 | 0 |
| <i>Elgaria_coerulea</i>             | 0 | 0 | 0 | 0 |



|                                 |   |   |   |   |
|---------------------------------|---|---|---|---|
| <i>Elgaria_kingii</i>           | 1 | 0 | 0 | 0 |
| <i>Elgaria_multicarinata</i>    | 1 | 0 | 0 | 0 |
| <i>Elgaria_panamintina</i>      | 1 | 0 | 0 | 0 |
| <i>Elgaria_paucicarinata</i>    | 1 | 0 | 0 | 0 |
| <i>Emoia_atrocostata</i>        | 1 | 0 | 0 | 0 |
| <i>Emoia_caeruleocauda</i>      | 1 | 0 | 0 | 0 |
| <i>Emoia_concolor</i>           | 1 | 0 | 0 | 0 |
| <i>Emoia_cyanogaster</i>        | 1 | 0 | 0 | 0 |
| <i>Emoia_cyanura</i>            | 1 | 0 | 0 | 0 |
| <i>Emoia_impar</i>              | 1 | 0 | 0 | 0 |
| <i>Emoia_isolata</i>            | 1 | 0 | 0 | 0 |
| <i>Emoia_jakati</i>             | 1 | 0 | 0 | 0 |
| <i>Emoia_loyaltiensis</i>       | 1 | 0 | 0 | 0 |
| <i>Emoia_physicae</i>           | 1 | 0 | 0 | 0 |
| <i>Emoia_pseudocyanura</i>      | 1 | 0 | 0 | 0 |
| <i>Emoia_schmidti</i>           | 1 | 0 | 0 | 0 |
| <i>Emoia_tongana</i>            | 1 | 0 | 0 | 0 |
| <i>Emydocephalus_annulatus</i>  | 0 | 0 | 0 | 0 |
| <i>Enhydriis_bocourti</i>       | 0 | 0 | 0 | 0 |
| <i>Enhydriis_chinensis</i>      | 0 | 0 | 0 | 0 |
| <i>Enhydriis_enhydriis</i>      | 0 | 0 | 0 | 0 |
| <i>Enhydriis_innominata</i>     | 0 | 0 | 0 | 0 |
| <i>Enhydriis_jagorii</i>        | 0 | 0 | 0 | 0 |
| <i>Enhydriis_longicauda</i>     | 0 | 0 | 0 | 0 |
| <i>Enhydriis_matannensis</i>    | 0 | 0 | 0 | 0 |
| <i>Enhydriis_plumbea</i>        | 0 | 0 | 0 | 0 |
| <i>Enhydriis_polylepis</i>      | 0 | 0 | 0 | 0 |
| <i>Enhydriis_punctata</i>       | 0 | 0 | 0 | 0 |
| <i>Enhydriis_subtaeniata</i>    | - | 0 | 0 | 0 |
| <i>Enyalioides_heterolepis</i>  | 1 | 0 | 0 | 0 |
| <i>Enyalioides_laticeps</i>     | 1 | 0 | 0 | 0 |
| <i>Enyalioides_microlepis</i>   | 1 | 0 | 0 | 0 |
| <i>Enyalioides_oshaghnessyi</i> | 1 | 0 | 0 | 0 |
| <i>Enyalioides_palpebralis</i>  | 1 | 0 | 0 | 0 |
| <i>Enyalioides_praestabilis</i> | 1 | 0 | 0 | 0 |
| <i>Enyalius_bilineatus</i>      | 1 | 0 | 0 | 0 |
| <i>Enyalius_leechei</i>         | 1 | 0 | 0 | 0 |
| <i>Ephalophis_greyae</i>        | 0 | 0 | 0 | 0 |
| <i>Epicrates_angulifer</i>      | 0 | 0 | 0 | 0 |
| <i>Epicrates_cenchria</i>       | 0 | 0 | 0 | 0 |
| <i>Epicrates_chrysogaster</i>   | 0 | 0 | 0 | 0 |
| <i>Epicrates_exsul</i>          | 0 | 0 | 0 | 0 |
| <i>Epicrates_fordi</i>          | 0 | 0 | 0 | 0 |
| <i>Epicrates_inornatus</i>      | 0 | 0 | 0 | 0 |

|                                   |   |   |   |   |
|-----------------------------------|---|---|---|---|
| <i>Epicrates_monensis</i>         | 0 | 0 | 0 | 0 |
| <i>Epicrates_striatus</i>         | 0 | 0 | 0 | 0 |
| <i>Epicrates_subflavus</i>        | 0 | 0 | 0 | 0 |
| <i>Epictia_albifrons</i>          | - | 0 | 0 | 0 |
| <i>Epictia_columbi</i>            | - | 0 | 0 | 0 |
| <i>Epictia_goudotii</i>           | - | 0 | 0 | 0 |
| <i>Epictia_magnamaculata</i>      | - | 0 | 0 | 0 |
| <i>Eremias_acutirostris</i>       | 1 | 0 | 0 | 0 |
| <i>Eremias_argus</i>              | 1 | 0 | 0 | 0 |
| <i>Eremias_arguta</i>             | 1 | 0 | 0 | 0 |
| <i>Eremias_brenchleyi</i>         | 1 | 0 | 0 | 0 |
| <i>Eremias_grammica</i>           | 1 | 0 | 0 | 0 |
| <i>Eremias_montanus</i>           | 1 | 0 | 0 | 0 |
| <i>Eremias_multiocellata</i>      | 0 | 0 | 0 | 0 |
| <i>Eremias_nigrolateralis</i>     | 1 | 0 | 0 | 0 |
| <i>Eremias_persica</i>            | 1 | 0 | 0 | 0 |
| <i>Eremias_pleskei</i>            | 1 | 0 | 0 | 0 |
| <i>Eremias_przewalskii</i>        | 0 | 0 | 0 | 0 |
| <i>Eremias_velox</i>              | 1 | 0 | 0 | 0 |
| <i>Eremias_vermiculata</i>        | 1 | 0 | 0 | 0 |
| <i>Eremiascincus_fasciolatus</i>  | 1 | 0 | 0 | 0 |
| <i>Eremiascincus_richardsonii</i> | 1 | 0 | 0 | 0 |
| <i>Eristicophis_macmahoni</i>     | 1 | 0 | 0 | 0 |
| <i>Erpeton_tentaculatum</i>       | 0 | 0 | 0 | 0 |
| <i>Erythrolamprus_aesculapii</i>  | 1 | 0 | 0 | 0 |
| <i>Erythrolamprus_mimus</i>       | 1 | 0 | 0 | 0 |
| <i>Eryx_colubrinus</i>            | - | 0 | 0 | 0 |
| <i>Eryx_conicus</i>               | - | 0 | 0 | 0 |
| <i>Eryx_elegans</i>               | 0 | 0 | 0 | 0 |
| <i>Eryx_jaculus</i>               | 0 | 0 | 0 | 0 |
| <i>Eryx_jayakari</i>              | 1 | 0 | 0 | 0 |
| <i>Eryx_johnii</i>                | 0 | 0 | 0 | 0 |
| <i>Eryx_miliaris</i>              | 0 | 0 | 0 | 0 |
| <i>Eryx_tataricus</i>             | 0 | 0 | 0 | 0 |
| <i>Eublepharis_macularius</i>     | 1 | 0 | 0 | 0 |
| <i>Eublepharis_turcmenicus</i>    | 1 | 0 | 0 | 0 |
| <i>Eugongylus_albofasciolatus</i> | - | 0 | 0 | 0 |
| <i>Eugongylus_rufescens</i>       | 1 | 0 | 0 | 0 |
| <i>Eulamprus_amplus</i>           | 0 | 0 | 0 | 0 |
| <i>Eulamprus_brachyosoma</i>      | 0 | 0 | 0 | 0 |
| <i>Eulamprus_frerei</i>           | 0 | 0 | 0 | 0 |
| <i>Eulamprus_heatwolei</i>        | 0 | 0 | 0 | 0 |
| <i>Eulamprus_kosciuskoi</i>       | 0 | 0 | 0 | 0 |
| <i>Eulamprus_leuraensis</i>       | 0 | 0 | 0 | 0 |

|                                    |   |   |   |   |
|------------------------------------|---|---|---|---|
| <i>Eulamprus_luteilateralis</i>    | 0 | 0 | 0 | 0 |
| <i>Eulamprus_martini</i>           | 0 | 0 | 0 | 0 |
| <i>Eulamprus_murrayi</i>           | 0 | 0 | 0 | 0 |
| <i>Eulamprus_quoyii</i>            | 0 | 0 | 0 | 0 |
| <i>Eulamprus_sokosoma</i>          | 0 | 0 | 0 | 0 |
| <i>Eulamprus_tenuis</i>            | 0 | 0 | 0 | 0 |
| <i>Eulamprus_tigrinus</i>          | 0 | 0 | 0 | 0 |
| <i>Eulamprus_tryoni</i>            | 0 | 0 | 0 | 0 |
| <i>Eulamprus_tympanum</i>          | 0 | 0 | 0 | 0 |
| <i>Euleptes_europaea</i>           | 1 | 1 | 0 | 0 |
| <i>Eumeces_algeriensis</i>         | 1 | 0 | 0 | 0 |
| <i>Eumeces_schneideri</i>          | 1 | 0 | 0 | 0 |
| <i>Eumecia_anchietae</i>           | 0 | 0 | 0 | 0 |
| <i>Eunectes_murinus</i>            | 0 | 0 | 0 | 0 |
| <i>Eunectes_notaeus</i>            | 0 | 0 | 0 | 0 |
| <i>Euprepiophis_conspicillatus</i> | - | 0 | 0 | 0 |
| <i>Euprepiophis_mandarinus</i>     | - | 0 | 0 | 0 |
| <i>Eurolophosaurus_amathites</i>   | 1 | 0 | 0 | 0 |
| <i>Eurolophosaurus_divaricatus</i> | 1 | 0 | 0 | 0 |
| <i>Eurolophosaurus_nanuzae</i>     | 1 | 0 | 0 | 0 |
| <i>Eurydactylodes_agricolae</i>    | 1 | 0 | 0 | 0 |
| <i>Eurydactylodes_occidentalis</i> | 1 | 0 | 0 | 0 |
| <i>Eurydactylodes_symmetricus</i>  | 1 | 0 | 0 | 0 |
| <i>Eurydactylodes_vieillardi</i>   | 1 | 0 | 0 | 0 |
| <i>Eurylepis_taeirolatus</i>       | - | 0 | 0 | 0 |
| <i>Eutropis_beddomii</i>           | - | 0 | 0 | 0 |
| <i>Eutropis_bibronii</i>           | - | 0 | 0 | 0 |
| <i>Eutropis_clivicola</i>          | - | 0 | 0 | 0 |
| <i>Eutropis_longicaudata</i>       | - | 0 | 0 | 0 |
| <i>Eutropis_macularia</i>          | 1 | 0 | 0 | 0 |
| <i>Eutropis_multicarinata</i>      | - | 0 | 0 | 0 |
| <i>Eutropis_multifasciata</i>      | 0 | 0 | 0 | 0 |
| <i>Eutropis_nagarjuni</i>          | - | 0 | 0 | 0 |
| <i>Eutropis_trivittata</i>         | - | 0 | 0 | 0 |
| <i>Exila_nigropalmata</i>          | - | 0 | 0 | 0 |
| <i>Exiliboa_placata</i>            | 0 | 0 | 0 | 0 |
| <i>Farancia_abacura</i>            | 1 | 0 | 0 | 0 |
| <i>Farancia_erytrogramma</i>       | 1 | 0 | 0 | 0 |
| <i>Feylinia_currori</i>            | 0 | 0 | 0 | 0 |
| <i>Feylinia_grandisquamis</i>      | 0 | 0 | 0 | 0 |
| <i>Feylinia_polylepis</i>          | 0 | 0 | 0 | 0 |
| <i>Ficimia_streckeri</i>           | 1 | 0 | 0 | 0 |
| <i>Fordonia_leucobalia</i>         | 0 | 0 | 0 | 0 |
| <i>Furcifer_angeli</i>             | 1 | 0 | 0 | 0 |

|                                |   |   |   |   |
|--------------------------------|---|---|---|---|
| <i>Furcifer_antimena</i>       | 1 | 0 | 0 | 0 |
| <i>Furcifer_balteatus</i>      | 1 | 0 | 0 | 0 |
| <i>Furcifer_belalandaensis</i> | 1 | 0 | 0 | 0 |
| <i>Furcifer_bifidus</i>        | 1 | 0 | 0 | 0 |
| <i>Furcifer_campani</i>        | 1 | 0 | 0 | 0 |
| <i>Furcifer_cephalolepis</i>   | 1 | 0 | 0 | 0 |
| <i>Furcifer_labordi</i>        | 1 | 0 | 0 | 0 |
| <i>Furcifer_lateralis</i>      | 1 | 0 | 0 | 0 |
| <i>Furcifer_minor</i>          | 1 | 0 | 0 | 0 |
| <i>Furcifer_oustaleti</i>      | 1 | 0 | 0 | 0 |
| <i>Furcifer_pardalis</i>       | 1 | 0 | 0 | 0 |
| <i>Furcifer_petteri</i>        | 1 | 0 | 0 | 0 |
| <i>Furcifer_polleni</i>        | 1 | 0 | 0 | 0 |
| <i>Furcifer_timoni</i>         | - | 0 | 0 | 0 |
| <i>Furcifer_verrucosus</i>     | 1 | 0 | 0 | 0 |
| <i>Furcifer_willsii</i>        | 1 | 0 | 0 | 0 |
| <i>Furina_diadema</i>          | 1 | 0 | 0 | 0 |
| <i>Furina_ornata</i>           | 1 | 0 | 0 | 0 |
| <i>Gallotia_atlantica</i>      | 1 | 0 | 0 | 0 |
| <i>Gallotia_bravoana</i>       | - | 0 | 0 | 0 |
| <i>Gallotia_caesaris</i>       | 1 | 0 | 0 | 0 |
| <i>Gallotia_galloti</i>        | 1 | 0 | 0 | 0 |
| <i>Gallotia_intermedia</i>     | 1 | 0 | 0 | 0 |
| <i>Gallotia_simonyi</i>        | 1 | 0 | 0 | 0 |
| <i>Gallotia_stehlini</i>       | 1 | 0 | 0 | 0 |
| <i>Gambelia_copeii</i>         | 1 | 0 | 0 | 0 |
| <i>Gambelia_sila</i>           | 1 | 0 | 0 | 0 |
| <i>Gambelia_wislizenii</i>     | 1 | 0 | 0 | 0 |
| <i>Garthius_chaseni</i>        | - | 0 | 0 | 0 |
| <i>Gastropholis_prasina</i>    | 1 | 0 | 0 | 0 |
| <i>Gastropholis_yittata</i>    | 1 | 0 | 0 | 0 |
| <i>Geckoella_triedrus</i>      | 1 | 1 | 0 | 0 |
| <i>Geckolepis_maculata</i>     | 1 | 1 | 0 | 0 |
| <i>Geckolepis_typica</i>       | 1 | 1 | 0 | 0 |
| <i>Geckonia_chazaliae</i>      | 1 | 1 | 0 | 0 |
| <i>Gehyra_australis</i>        | 1 | 1 | 0 | 0 |
| <i>Gehyra_baliola</i>          | 1 | 1 | 0 | 0 |
| <i>Gehyra_barea</i>            | 1 | 1 | 0 | 0 |
| <i>Gehyra_borrooloola</i>      | 1 | 1 | 0 | 0 |
| <i>Gehyra_brevipalmata</i>     | 1 | 1 | 0 | 0 |
| <i>Gehyra_catenata</i>         | 1 | 1 | 0 | 0 |
| <i>Gehyra_dubia</i>            | 1 | 1 | 0 | 0 |
| <i>Gehyra_fehlmanni</i>        | 1 | 1 | 0 | 0 |
| <i>Gehyra_koira</i>            | 1 | 1 | 0 | 0 |

|                                        |   |   |   |   |
|----------------------------------------|---|---|---|---|
| <i>Gehyra_lacerata</i>                 | 1 | 1 | 0 | 0 |
| <i>Gehyra_marginata</i>                | 1 | 1 | 0 | 0 |
| <i>Gehyra_membranacruralis</i>         | 1 | 1 | 0 | 0 |
| <i>Gehyra_minuta</i>                   | 1 | 1 | 0 | 0 |
| <i>Gehyra_montium</i>                  | 1 | 1 | 0 | 0 |
| <i>Gehyra_mutilata</i>                 | 1 | 1 | 0 | 0 |
| <i>Gehyra_nana</i>                     | 1 | 1 | 0 | 0 |
| <i>Gehyra_occidentalis</i>             | 1 | 1 | 0 | 0 |
| <i>Gehyra_oceanica</i>                 | 1 | 1 | 0 | 0 |
| <i>Gehyra_pamela</i>                   | 1 | 1 | 0 | 0 |
| <i>Gehyra_pilbara</i>                  | 1 | 1 | 0 | 0 |
| <i>Gehyra_punctata</i>                 | 1 | 1 | 0 | 0 |
| <i>Gehyra_purpurascens</i>             | 1 | 1 | 0 | 0 |
| <i>Gehyra_robusta</i>                  | 1 | 1 | 0 | 0 |
| <i>Gehyra_sp._MPH-2011</i>             | - | 1 | 0 | 0 |
| <i>Gehyra_variegata</i>                | 1 | 1 | 0 | 0 |
| <i>Gehyra_xenopus</i>                  | 1 | 1 | 0 | 0 |
| <i>Gekko_athymus</i>                   | 1 | 1 | 0 | 0 |
| <i>Gekko_auriverrucosus</i>            | 1 | 1 | 0 | 0 |
| <i>Gekko_badenii</i>                   | 1 | 1 | 0 | 0 |
| <i>Gekko_carusadensis</i>              | - | 1 | 0 | 0 |
| <i>Gekko_chinensis</i>                 | 1 | 1 | 0 | 0 |
| <i>Gekko_coi</i>                       | - | 1 | 0 | 0 |
| <i>Gekko_crombota</i>                  | 1 | 1 | 0 | 0 |
| <i>Gekko_ernstkeileri</i>              | 1 | 1 | 0 | 0 |
| <i>Gekko_gecko</i>                     | 1 | 1 | 0 | 0 |
| <i>Gekko_gigante</i>                   | 1 | 1 | 0 | 0 |
| <i>Gekko_grossmanni</i>                | 1 | 1 | 0 | 0 |
| <i>Gekko_hokouensis</i>                | 1 | 1 | 0 | 0 |
| <i>Gekko_japonicus</i>                 | 1 | 1 | 0 | 0 |
| <i>Gekko_mindorensis</i>               | 1 | 1 | 0 | 0 |
| <i>Gekko_monarchus</i>                 | 1 | 1 | 0 | 0 |
| <i>Gekko_palawanensis</i>              | 1 | 1 | 0 | 0 |
| <i>Gekko_petricolus</i>                | 1 | 1 | 0 | 0 |
| <i>Gekko_porosus</i>                   | 1 | 1 | 0 | 0 |
| <i>Gekko_romblon</i>                   | 1 | 1 | 0 | 0 |
| <i>Gekko_rossi</i>                     | - | 1 | 0 | 0 |
| <i>Gekko_smithii</i>                   | 1 | 1 | 0 | 0 |
| <i>Gekko_sp._Camiguin_Norte_Island</i> | - | 1 | 0 | 0 |
| <i>Gekko_sp._Dalupiri_Island</i>       | - | 1 | 0 | 0 |
| <i>Gekko_swinhoni</i>                  | 1 | 1 | 0 | 0 |
| <i>Gekko_vittatus</i>                  | 1 | 1 | 0 | 0 |
| <i>Geocalamus_acutus</i>               | 1 | 0 | 0 | 0 |
| <i>Geophis_carinosus</i>               | 1 | 0 | 0 | 0 |

|                                     |   |   |   |   |
|-------------------------------------|---|---|---|---|
| <i>Gerarda_prevostiana</i>          | 0 | 0 | 0 | 0 |
| <i>Gerrhonotus_infernalis</i>       | 1 | 0 | 0 | 0 |
| <i>Gerrhonotus_liocephalus</i>      | 1 | 0 | 0 | 0 |
| <i>Gerrhonotus_parvus</i>           | 1 | 0 | 0 | 0 |
| <i>Gerrhosaurus_flavigularis</i>    | 1 | 0 | 0 | 0 |
| <i>Gerrhosaurus_major</i>           | 1 | 0 | 0 | 0 |
| <i>Gerrhosaurus_multilineatus</i>   | 1 | 0 | 0 | 0 |
| <i>Gerrhosaurus_nigrolineatus</i>   | 1 | 0 | 0 | 0 |
| <i>Gerrhosaurus_typicus</i>         | 1 | 0 | 0 | 0 |
| <i>Gerrhosaurus_validus</i>         | 1 | 0 | 0 | 0 |
| <i>Glaphyromorphus_cracens</i>      | 1 | 0 | 0 | 0 |
| <i>Glaphyromorphus_darwiniensis</i> | 1 | 0 | 0 | 0 |
| <i>Glaphyromorphus_douglasi</i>     | 1 | 0 | 0 | 0 |
| <i>Glaphyromorphus_fuscicaudis</i>  | 1 | 0 | 0 | 0 |
| <i>Glaphyromorphus_gracilipes</i>   | 0 | 0 | 0 | 0 |
| <i>Glaphyromorphus_isolepis</i>     | 1 | 0 | 0 | 0 |
| <i>Glaphyromorphus_mjobergi</i>     | 1 | 0 | 0 | 0 |
| <i>Glaphyromorphus_pardalis</i>     | 1 | 0 | 0 | 0 |
| <i>Glaphyromorphus_pumilus</i>      | 1 | 0 | 0 | 0 |
| <i>Glaphyromorphus_punctulatus</i>  | 1 | 0 | 0 | 0 |
| <i>Gloydus_blohmoffi</i>            | - | 0 | 0 | 0 |
| <i>Gloydus_brevicaudus</i>          | 0 | 0 | 0 | 0 |
| <i>Gloydus_halys</i>                | 0 | 0 | 0 | 0 |
| <i>Gloydus_intermedius</i>          | 0 | 0 | 0 | 0 |
| <i>Gloydus_saxatilis</i>            | 0 | 0 | 0 | 0 |
| <i>Gloydus_shedaoensis</i>          | 0 | 0 | 0 | 0 |
| <i>Gloydus_strauchi</i>             | 0 | 0 | 0 | 0 |
| <i>Gloydus_tsushimaensis</i>        | 0 | 0 | 0 | 0 |
| <i>Gloydus_ussuriensis</i>          | 0 | 0 | 0 | 0 |
| <i>Gnypetoscincus_queenslandiae</i> | 0 | 0 | 0 | 0 |
| <i>Goggia_lineata</i>               | 1 | 1 | 0 | 0 |
| <i>Gomesophis_brasiliensis</i>      | 0 | 0 | 0 | 0 |
| <i>Gonatodes_albogularis</i>        | 1 | 1 | 0 | 0 |
| <i>Gonatodes_alexandermendesi</i>   | 1 | 1 | 0 | 0 |
| <i>Gonatodes_annularis</i>          | 1 | 1 | 0 | 0 |
| <i>Gonatodes_antillensis</i>        | 1 | 1 | 0 | 0 |
| <i>Gonatodes_caudiscutatus</i>      | 1 | 1 | 0 | 0 |
| <i>Gonatodes_ceciliae</i>           | 1 | 1 | 0 | 0 |
| <i>Gonatodes_concinnatus</i>        | 1 | 1 | 0 | 0 |
| <i>Gonatodes_daudini</i>            | 1 | 1 | 0 | 0 |
| <i>Gonatodes_eladioi</i>            | 1 | 1 | 0 | 0 |
| <i>Gonatodes_falconensis</i>        | 1 | 1 | 0 | 0 |
| <i>Gonatodes_hasemani</i>           | 1 | 1 | 0 | 0 |
| <i>Gonatodes_humeralis</i>          | 1 | 1 | 0 | 0 |

|                                     |   |   |   |   |
|-------------------------------------|---|---|---|---|
| <i>Gonatodes_infernalis</i>         | 1 | 1 | 0 | 0 |
| <i>Gonatodes_ocellatus</i>          | 1 | 1 | 0 | 0 |
| <i>Gonatodes_petersi</i>            | 1 | 1 | 0 | 0 |
| <i>Gonatodes_purpurogularis</i>     | 1 | 1 | 0 | 0 |
| <i>Gonatodes_seigliei</i>           | 1 | 1 | 0 | 0 |
| <i>Gonatodes_sp._BPN_1303</i>       | - | 1 | 0 | 0 |
| <i>Gonatodes_superciliaris</i>      | 1 | 1 | 0 | 0 |
| <i>Gonatodes_taniae</i>             | 1 | 1 | 0 | 0 |
| <i>Gonatodes_vittatus</i>           | 1 | 1 | 0 | 0 |
| <i>Gongylomorphus_bojerii</i>       | - | 0 | 0 | 0 |
| <i>Gonionotophis_brussauxi</i>      | 1 | 0 | 0 | 0 |
| <i>Goniurosaurus_araneus</i>        | 1 | 0 | 0 | 0 |
| <i>Goniurosaurus_catbaensis</i>     | 1 | 0 | 0 | 0 |
| <i>Goniurosaurus_kuroiwae</i>       | 1 | 0 | 0 | 0 |
| <i>Goniurosaurus_lichtenfelderi</i> | 1 | 0 | 0 | 0 |
| <i>Goniurosaurus_luii</i>           | 1 | 0 | 0 | 0 |
| <i>Gonocephalus_chamaeleontinus</i> | 1 | 0 | 0 | 0 |
| <i>Gonocephalus_grandis</i>         | 1 | 0 | 0 | 0 |
| <i>Gonocephalus_kuhlii</i>          | 1 | 0 | 0 | 0 |
| <i>Gonocephalus_robinsonii</i>      | 1 | 0 | 0 | 0 |
| <i>Gonyosoma_janseni</i>            | 1 | 0 | 0 | 0 |
| <i>Gonyosoma_oxycepalum</i>         | 1 | 0 | 0 | 0 |
| <i>Graciliscincus_shonae</i>        | - | 0 | 0 | 0 |
| <i>Grayia_ornata</i>                | 1 | 0 | 0 | 0 |
| <i>Grayia_smythii</i>               | - | 0 | 0 | 0 |
| <i>Grayia_tholloni</i>              | 1 | 0 | 0 | 0 |
| <i>Guinea_bicolor</i>               | - | 0 | 0 | 0 |
| <i>Gyalopion_canum</i>              | 1 | 0 | 0 | 0 |
| <i>Gymnodactylus_geckoides</i>      | 1 | 1 | 0 | 0 |
| <i>Gymnophthalmus_cryptus</i>       | 1 | 0 | 0 | 0 |
| <i>Gymnophthalmus_leucomystax</i>   | 1 | 0 | 0 | 0 |
| <i>Gymnophthalmus_pleei</i>         | 1 | 0 | 0 | 0 |
| <i>Gymnophthalmus_speciosus</i>     | 1 | 0 | 0 | 0 |
| <i>Gymnophthalmus_underwoodi</i>    | 1 | 0 | 0 | 0 |
| <i>Gymnophthalmus_vanzoi</i>        | 1 | 0 | 0 | 0 |
| <i>Haemodracon_riebeckii</i>        | 1 | 1 | 0 | 0 |
| <i>Hakaria_simonyi</i>              | - | 0 | 0 | 0 |
| <i>Haplocercus_ceylonensis</i>      | 1 | 0 | 0 | 0 |
| <i>Hapsidophrys_lineatus</i>        | 1 | 0 | 0 | 0 |
| <i>Hapsidophrys_principis</i>       | 1 | 0 | 0 | 0 |
| <i>Hapsidophrys_smaragdina</i>      | 1 | 0 | 0 | 0 |
| <i>Helicops_angulatus</i>           | - | 0 | 0 | 0 |
| <i>Helicops_gomesi</i>              | 0 | 0 | 0 | 0 |
| <i>Helicops_infrataeniatus</i>      | 0 | 0 | 0 | 0 |

|                                   |   |   |   |   |
|-----------------------------------|---|---|---|---|
| <i>Heliobolus_lugubris</i>        | 1 | 0 | 0 | 0 |
| <i>Heliobolus_spekii</i>          | 1 | 0 | 0 | 0 |
| <i>Hellenolacerta_graeca</i>      | 1 | 0 | 0 | 0 |
| <i>Heloderma_horridum</i>         | 1 | 0 | 0 | 0 |
| <i>Heloderma_suspectum</i>        | 1 | 0 | 0 | 0 |
| <i>Hemachatus_haemachatus</i>     | 0 | 0 | 0 | 0 |
| <i>Hemerophis_socotrae</i>        | 1 | 0 | 0 | 0 |
| <i>Hemiaspis_dameli</i>           | 0 | 0 | 0 | 0 |
| <i>Hemiaspis_signata</i>          | 0 | 0 | 0 | 0 |
| <i>Hemibungarus_calligaster</i>   | 1 | 0 | 0 | 0 |
| <i>Hemicordylus_capensis</i>      | - | 0 | 0 | 0 |
| <i>Hemicordylus_nebulosus</i>     | - | 0 | 0 | 0 |
| <i>Hemidactylus_aaronbaueri</i>   | 1 | 1 | 0 | 0 |
| <i>Hemidactylus_agrius</i>        | 1 | 1 | 0 | 0 |
| <i>Hemidactylus_albofasciatus</i> | 1 | 1 | 0 | 0 |
| <i>Hemidactylus_angulatus</i>     | 1 | 1 | 0 | 0 |
| <i>Hemidactylus_bouvieri</i>      | 1 | 1 | 0 | 0 |
| <i>Hemidactylus_bowringii</i>     | 1 | 1 | 0 | 0 |
| <i>Hemidactylus_brasilianus</i>   | 1 | 1 | 0 | 0 |
| <i>Hemidactylus_brookii</i>       | 1 | 1 | 0 | 0 |
| <i>Hemidactylus_citernii</i>      | 1 | 1 | 0 | 0 |
| <i>Hemidactylus_depressus</i>     | 1 | 1 | 0 | 0 |
| <i>Hemidactylus_dracaenacolus</i> | 1 | 1 | 0 | 0 |
| <i>Hemidactylus_fasciatus</i>     | 1 | 1 | 0 | 0 |
| <i>Hemidactylus_flaviviridis</i>  | 1 | 1 | 0 | 0 |
| <i>Hemidactylus_forbesii</i>      | 1 | 1 | 0 | 0 |
| <i>Hemidactylus_foudaii</i>       | 1 | 1 | 0 | 0 |
| <i>Hemidactylus_frenatus</i>      | 1 | 1 | 0 | 0 |
| <i>Hemidactylus_garnotii</i>      | 1 | 1 | 0 | 0 |
| <i>Hemidactylus_giganteus</i>     | 1 | 1 | 0 | 0 |
| <i>Hemidactylus_gracilis</i>      | 1 | 1 | 0 | 0 |
| <i>Hemidactylus_granti</i>        | 1 | 1 | 0 | 0 |
| <i>Hemidactylus_greeffii</i>      | - | 1 | 0 | 0 |
| <i>Hemidactylus_haitianus</i>     | 1 | 1 | 0 | 0 |
| <i>Hemidactylus_homoeolepis</i>   | 1 | 1 | 0 | 0 |
| <i>Hemidactylus_karenorum</i>     | 1 | 1 | 0 | 0 |
| <i>Hemidactylus_lemurinus</i>     | 1 | 1 | 0 | 0 |
| <i>Hemidactylus_leschenaultii</i> | 1 | 1 | 0 | 0 |
| <i>Hemidactylus_longicephalus</i> | 1 | 1 | 0 | 0 |
| <i>Hemidactylus_lopezjuradoi</i>  | 1 | 1 | 0 | 0 |
| <i>Hemidactylus_mabouia</i>       | 1 | 1 | 0 | 0 |
| <i>Hemidactylus_macropholis</i>   | 1 | 1 | 0 | 0 |
| <i>Hemidactylus_maculatus</i>     | 1 | 1 | 0 | 0 |
| <i>Hemidactylus_mercatorius</i>   | 1 | 1 | 0 | 0 |



|                                         |   |   |   |   |
|-----------------------------------------|---|---|---|---|
| <i>Hemidactylus_mindiae</i>             | 1 | 1 | 0 | 0 |
| <i>Hemidactylus_modestus</i>            | 1 | 1 | 0 | 0 |
| <i>Hemidactylus_oxyrhinus</i>           | 1 | 1 | 0 | 0 |
| <i>Hemidactylus_palaichthus</i>         | 1 | 1 | 0 | 0 |
| <i>Hemidactylus_persicus</i>            | 1 | 1 | 0 | 0 |
| <i>Hemidactylus_platycephalus</i>       | 1 | 1 | 0 | 0 |
| <i>Hemidactylus_platyurus</i>           | 1 | 1 | 0 | 0 |
| <i>Hemidactylus_prashadi</i>            | 1 | 1 | 0 | 0 |
| <i>Hemidactylus_pumilio</i>             | 1 | 1 | 0 | 0 |
| <i>Hemidactylus_reticulatus</i>         | 1 | 1 | 0 | 0 |
| <i>Hemidactylus_robustus</i>            | 1 | 1 | 0 | 0 |
| <i>Hemidactylus_sataraensis</i>         | 1 | 1 | 0 | 0 |
| <i>Hemidactylus_triedrus</i>            | 1 | 1 | 0 | 0 |
| <i>Hemidactylus_turcicus</i>            | 1 | 1 | 0 | 0 |
| <i>Hemidactylus_yerburii</i>            | - | 1 | 0 | 0 |
| <i>Hemiergus_decrensiensis</i>          | 0 | 0 | 0 | 0 |
| <i>Hemiergus_initialis</i>              | 0 | 0 | 0 | 0 |
| <i>Hemiergus_millewae</i>               | 0 | 0 | 0 | 0 |
| <i>Hemiergus_peronii</i>                | 0 | 0 | 0 | 0 |
| <i>Hemiergus_quadriineatum</i>          | 0 | 0 | 0 | 0 |
| <i>Hemiphylloactylus_aurantiacus</i>    | 1 | 1 | 0 | 0 |
| <i>Hemiphylloactylus_sp._MPH-2011</i>   | - | 1 | 0 | 0 |
| <i>Hemiphylloactylus_titiwangsensis</i> | - | 1 | 0 | 0 |
| <i>Hemiphylloactylus_typus</i>          | 1 | 1 | 0 | 0 |
| <i>Hemiphylloactylus_yunnanensis</i>    | 1 | 1 | 0 | 0 |
| <i>Hemirhagerrhis_hildebrandtii</i>     | 1 | 0 | 0 | 0 |
| <i>Hemirhagerrhis_kelleri</i>           | 1 | 0 | 0 | 0 |
| <i>Hemirhagerrhis_viperina</i>          | 1 | 0 | 0 | 0 |
| <i>Hemitheconyx_caudicinctus</i>        | 1 | 0 | 0 | 0 |
| <i>Hemitheconyx_taylori</i>             | 1 | 0 | 0 | 0 |
| <i>Hemorrhais_algirus</i>               | 1 | 0 | 0 | 0 |
| <i>Hemorrhais_hippocrepis</i>           | 1 | 0 | 0 | 0 |
| <i>Hemorrhais_nummifer</i>              | 1 | 0 | 0 | 0 |
| <i>Hemorrhais_ravergieri</i>            | 1 | 0 | 0 | 0 |
| <i>Heterodactylus_imbricatus</i>        | 1 | 0 | 0 | 0 |
| <i>Heterodon_nasicus</i>                | 1 | 0 | 0 | 0 |
| <i>Heterodon_platirhinus</i>            | 1 | 0 | 0 | 0 |
| <i>Heterodon_simus</i>                  | 1 | 0 | 0 | 0 |
| <i>Heteroliodon_occipitalis</i>         | 1 | 0 | 0 | 0 |
| <i>Heteronotia_binoei</i>               | 1 | 1 | 0 | 0 |
| <i>Heteronotia_planiceps</i>            | 1 | 1 | 0 | 0 |
| <i>Heteronotia_spelea</i>               | 1 | 1 | 0 | 0 |
| <i>Hierophis_gemonensis</i>             | 1 | 0 | 0 | 0 |
| <i>Hierophis_jugularis</i>              | - | 0 | 0 | 0 |

|                                      |   |   |   |   |
|--------------------------------------|---|---|---|---|
| <i>Hierophis_schmidti</i>            | - | 0 | 0 | 0 |
| <i>Hierophis_spinalis</i>            | 1 | 0 | 0 | 0 |
| <i>Hierophis_viridiflavus</i>        | 1 | 0 | 0 | 0 |
| <i>Himalayophis_tibetanus</i>        | 0 | 0 | 0 | 0 |
| <i>Holaspis_guentheri</i>            | 1 | 0 | 0 | 0 |
| <i>Holaspis_laevis</i>               | 1 | 0 | 0 | 0 |
| <i>Holbrookia_lacerata</i>           | 1 | 0 | 0 | 0 |
| <i>Holbrookia_maculata</i>           | 1 | 0 | 0 | 0 |
| <i>Holbrookia_propinqua</i>          | 1 | 0 | 0 | 0 |
| <i>Holodactylus_africanus</i>        | 1 | 0 | 0 | 0 |
| <i>Homalopsis_buccata</i>            | 0 | 0 | 0 | 0 |
| <i>Homonota_andicola</i>             | 1 | 1 | 0 | 0 |
| <i>Homonota_borellii</i>             | 1 | 1 | 0 | 0 |
| <i>Homonota_darwinii</i>             | 1 | 1 | 0 | 0 |
| <i>Homonota_fasciata</i>             | 1 | 1 | 0 | 0 |
| <i>Homonota_gaudichaudii</i>         | 1 | 1 | 0 | 0 |
| <i>Homonota_underwoodi</i>           | 1 | 1 | 0 | 0 |
| <i>Homopholis_fasciata</i>           | 1 | 1 | 0 | 0 |
| <i>Homopholis_mulleri</i>            | 1 | 1 | 0 | 0 |
| <i>Homopholis_walbergii</i>          | 1 | 1 | 0 | 0 |
| <i>Homoroselaps_lacteus</i>          | 1 | 0 | 0 | 0 |
| <i>Hoplocephalus_bitorquatus</i>     | 0 | 0 | 0 | 0 |
| <i>Hoplocercus_spinosus</i>          | 1 | 0 | 0 | 0 |
| <i>Hoplodactylus_chrysosireticus</i> | 0 | 0 | 0 | 0 |
| <i>Hoplodactylus_cryptozoicus</i>    | 0 | 0 | 0 | 0 |
| <i>Hoplodactylus_duvaucelii</i>      | 0 | 0 | 0 | 0 |
| <i>Hoplodactylus_kahutarae</i>       | 0 | 0 | 0 | 0 |
| <i>Hoplodactylus_nebulosus</i>       | 0 | 0 | 0 | 0 |
| <i>Hoplodactylus_pacificus</i>       | 0 | 0 | 0 | 0 |
| <i>Hoplodactylus_rakiurae</i>        | 0 | 0 | 0 | 0 |
| <i>Hoplodactylus_stephensi</i>       | 0 | 0 | 0 | 0 |
| <i>Hormonotus_modestus</i>           | 1 | 0 | 0 | 0 |
| <i>Hydrelaps_darwiniensis</i>        | 0 | 0 | 0 | 0 |
| <i>Hydrodynastes_bicinctus</i>       | 1 | 0 | 0 | 0 |
| <i>Hydrodynastes_gigas</i>           | 1 | 0 | 0 | 0 |
| <i>Hydromorphus_concolor</i>         | 1 | 0 | 0 | 0 |
| <i>Hydrophis_atriceps</i>            | 0 | 0 | 0 | 0 |
| <i>Hydrophis_brooki</i>              | 0 | 0 | 0 | 0 |
| <i>Hydrophis_lapemoides</i>          | 0 | 0 | 0 | 0 |
| <i>Hydrophis_macdowellii</i>         | 0 | 0 | 0 | 0 |
| <i>Hydrophis_ornatus</i>             | 0 | 0 | 0 | 0 |
| <i>Hydrophis_parviceps</i>           | 0 | 0 | 0 | 0 |
| <i>Hydrophis_schistosa</i>           | - | 0 | 0 | 0 |
| <i>Hydrops_triangularis</i>          | 0 | 0 | 0 | 0 |

|                                   |   |   |   |   |
|-----------------------------------|---|---|---|---|
| <i>Hydrosaurus_amboinensis</i>    | 1 | 0 | 0 | 0 |
| <i>Hypnale_hypnale</i>            | 0 | 0 | 0 | 0 |
| <i>Hypnale_nepa</i>               | 0 | 0 | 0 | 0 |
| <i>Hypnale_zara</i>               | 0 | 0 | 0 | 0 |
| <i>Hypsiglena_affinis</i>         | 1 | 0 | 0 | 0 |
| <i>Hypsiglena_chlorophaea</i>     | 1 | 0 | 0 | 0 |
| <i>Hypsiglena_jani</i>            | 1 | 0 | 0 | 0 |
| <i>Hypsiglena_ochrorhyncha</i>    | 1 | 0 | 0 | 0 |
| <i>Hypsiglena_slevini</i>         | 1 | 0 | 0 | 0 |
| <i>Hypsiglena_tanzeri</i>         | 1 | 0 | 0 | 0 |
| <i>Hypsiglena_torquata</i>        | 1 | 0 | 0 | 0 |
| <i>Hypsilurus_boydii</i>          | 1 | 0 | 0 | 0 |
| <i>Hypsilurus_bruijnii</i>        | 1 | 0 | 0 | 0 |
| <i>Hypsilurus_dilophus</i>        | 1 | 0 | 0 | 0 |
| <i>Hypsilurus_modestus</i>        | 1 | 0 | 0 | 0 |
| <i>Hypsilurus_nigrigularis</i>    | 1 | 0 | 0 | 0 |
| <i>Hypsilurus_papuensis</i>       | 1 | 0 | 0 | 0 |
| <i>Hypsilurus_spinipes</i>        | 1 | 0 | 0 | 0 |
| <i>Hypsirhynchus_callilaemus</i>  | - | 0 | 0 | 0 |
| <i>Hypsirhynchus_ferox</i>        | 1 | 0 | 0 | 0 |
| <i>Hypsirhynchus_polylepis</i>    | - | 0 | 0 | 0 |
| <i>Hypsirhynchus_scalaris</i>     | - | 0 | 0 | 0 |
| <i>Ialtris_dorsalis</i>           | 1 | 0 | 0 | 0 |
| <i>Iberolacerta_aranica</i>       | 1 | 0 | 0 | 0 |
| <i>Iberolacerta_aurelioi</i>      | 1 | 0 | 0 | 0 |
| <i>Iberolacerta_bonnali</i>       | 1 | 0 | 0 | 0 |
| <i>Iberolacerta_cyreni</i>        | 1 | 0 | 0 | 0 |
| <i>Iberolacerta_galani</i>        | 1 | 0 | 0 | 0 |
| <i>Iberolacerta_horvathi</i>      | 1 | 0 | 0 | 0 |
| <i>Iberolacerta_martinezricai</i> | - | 0 | 0 | 0 |
| <i>Iberolacerta_monticola</i>     | 1 | 0 | 0 | 0 |
| <i>Ichnotropis_capensis</i>       | 1 | 0 | 0 | 0 |
| <i>Ichnotropis_squamulosa</i>     | 1 | 0 | 0 | 0 |
| <i>Iguana_delicatissima</i>       | 1 | 0 | 0 | 0 |
| <i>Iguana_iguana</i>              | 1 | 0 | 0 | 0 |
| <i>Imantodes_cenchoa</i>          | 1 | 0 | 0 | 0 |
| <i>Imantodes_gemmistratus</i>     | 1 | 0 | 0 | 0 |
| <i>Imantodes_inornatus</i>        | 1 | 0 | 0 | 0 |
| <i>Imantodes_lentiferus</i>       | 1 | 0 | 0 | 0 |
| <i>Iphisa_elegans</i>             | 1 | 0 | 0 | 0 |
| <i>Iranolacerta_brandtii</i>      | 1 | 0 | 0 | 0 |
| <i>Iranolacerta_zagrosica</i>     | 1 | 0 | 0 | 0 |
| <i>Isopachys_anguinoides</i>      | 0 | 0 | 0 | 0 |
| <i>Ithycyphus_miniatus</i>        | 1 | 0 | 0 | 0 |

|                                        |   |   |   |   |
|----------------------------------------|---|---|---|---|
| <i>Ithycyphus_oursi</i>                | 1 | 0 | 0 | 0 |
| <i>Janetaescincus_braueri</i>          | - | 0 | 0 | 0 |
| <i>Janetaescincus_veseyfitzgeraldi</i> | - | 0 | 0 | 0 |
| <i>Japalura_flaviceps</i>              | 1 | 0 | 0 | 0 |
| <i>Japalura_polygonata</i>             | 1 | 0 | 0 | 0 |
| <i>Japalura_splendida</i>              | 1 | 0 | 0 | 0 |
| <i>Japalura_tricarinata</i>            | 1 | 0 | 0 | 0 |
| <i>Japalura_variegata</i>              | 1 | 0 | 0 | 0 |
| <i>Kanakysaurus_viviparus</i>          | - | 0 | 0 | 0 |
| <i>Karusasaurus_jordani</i>            | - | 0 | 0 | 0 |
| <i>Karusasaurus_polyzonus</i>          | - | 0 | 0 | 0 |
| <i>Kentropyx_altamazonica</i>          | 1 | 0 | 0 | 0 |
| <i>Kentropyx_calcarata</i>             | 1 | 0 | 0 | 0 |
| <i>Kentropyx_paulensis</i>             | 1 | 0 | 0 | 0 |
| <i>Kentropyx_pelviceps</i>             | 1 | 0 | 0 | 0 |
| <i>Kentropyx_striata</i>               | 1 | 0 | 0 | 0 |
| <i>Kentropyx_vanzoi</i>                | 1 | 0 | 0 | 0 |
| <i>Kentropyx_viridistriga</i>          | 1 | 0 | 0 | 0 |
| <i>Kinyongia_adolffriderici</i>        | 1 | 0 | 0 | 0 |
| <i>Kinyongia_boehmei</i>               | 1 | 0 | 0 | 0 |
| <i>Kinyongia_carpenteri</i>            | 1 | 0 | 0 | 0 |
| <i>Kinyongia_cf._oxyrhina</i>          | - | 0 | 0 | 0 |
| <i>Kinyongia_excubitor</i>             | 1 | 0 | 0 | 0 |
| <i>Kinyongia_fischeri</i>              | 1 | 0 | 0 | 0 |
| <i>Kinyongia_magomberae</i>            | - | 0 | 0 | 0 |
| <i>Kinyongia_matschiei</i>             | 1 | 0 | 0 | 0 |
| <i>Kinyongia_multituberculata</i>      | 1 | 0 | 0 | 0 |
| <i>Kinyongia_oxyrhina</i>              | 1 | 0 | 0 | 0 |
| <i>Kinyongia_tavetana</i>              | 1 | 0 | 0 | 0 |
| <i>Kinyongia_tenuis</i>                | - | 0 | 0 | 0 |
| <i>Kinyongia_uluguruensis</i>          | 1 | 0 | 0 | 0 |
| <i>Kinyongia_uthmoelleri</i>           | 1 | 0 | 0 | 0 |
| <i>Kinyongia_vosseleri</i>             | 1 | 0 | 0 | 0 |
| <i>Kinyongia_xenorhina</i>             | 1 | 0 | 0 | 0 |
| <i>Lacerta_agilis</i>                  | 1 | 0 | 0 | 0 |
| <i>Lacerta_bedriagae</i>               | - | 0 | 0 | 0 |
| <i>Lacerta_bendimahiensis</i>          | - | 0 | 0 | 0 |
| <i>Lacerta_bilineata</i>               | 1 | 0 | 0 | 0 |
| <i>Lacerta_dugesii</i>                 | - | 0 | 0 | 0 |
| <i>Lacerta_media</i>                   | 1 | 0 | 0 | 0 |
| <i>Lacerta_pamphylica</i>              | 1 | 0 | 0 | 0 |
| <i>Lacerta_sapphirina</i>              | - | 0 | 0 | 0 |
| <i>Lacerta_schreiberi</i>              | 1 | 0 | 0 | 0 |
| <i>Lacerta_strigata</i>                | 1 | 0 | 0 | 0 |

|                                 |   |   |   |   |
|---------------------------------|---|---|---|---|
| <i>Lacerta_trilineata</i>       | 1 | 0 | 0 | 0 |
| <i>Lacerta_uzzelli</i>          | - | 0 | 0 | 0 |
| <i>Lacerta_viridis</i>          | 1 | 0 | 0 | 0 |
| <i>Lacertaspis_chriswildi</i>   | - | 0 | 0 | 0 |
| <i>Lacertaspis_gemmiventris</i> | - | 0 | 0 | 0 |
| <i>Lacertaspis_lepesmei</i>     | - | 0 | 0 | 0 |
| <i>Lacertaspis_reichenowi</i>   | - | 0 | 0 | 0 |
| <i>Lacertaspis_rohdei</i>       | - | 0 | 0 | 0 |
| <i>Lacertoides_pardalis</i>     | - | 0 | 0 | 0 |
| <i>Lachesis_muta</i>            | 1 | 0 | 0 | 0 |
| <i>Lachesis_stenophrys</i>      | 1 | 0 | 0 | 0 |
| <i>Laemactus_longipes</i>       | 1 | 0 | 0 | 0 |
| <i>Lamprolepis_smaragdina</i>   | 1 | 0 | 0 | 0 |
| <i>Lampropeltis_alterna</i>     | 1 | 0 | 0 | 0 |
| <i>Lampropeltis_californiae</i> | 1 | 0 | 0 | 0 |
| <i>Lampropeltis_calligaster</i> | 1 | 0 | 0 | 0 |
| <i>Lampropeltis_getula</i>      | 1 | 0 | 0 | 0 |
| <i>Lampropeltis_holbrooki</i>   | 1 | 0 | 0 | 0 |
| <i>Lampropeltis_mexicana</i>    | 1 | 0 | 0 | 0 |
| <i>Lampropeltis_nigra</i>       | 1 | 0 | 0 | 0 |
| <i>Lampropeltis_pyromelana</i>  | 1 | 0 | 0 | 0 |
| <i>Lampropeltis_ruthveni</i>    | 1 | 0 | 0 | 0 |
| <i>Lampropeltis_splendida</i>   | 1 | 0 | 0 | 0 |
| <i>Lampropeltis_triangulum</i>  | 1 | 0 | 0 | 0 |
| <i>Lampropeltis_webbi</i>       | 1 | 0 | 0 | 0 |
| <i>Lampropeltis_zonata</i>      | 1 | 0 | 0 | 0 |
| <i>Lamprophis_aurora</i>        | 1 | 0 | 0 | 0 |
| <i>Lamprophis_fiskii</i>        | 1 | 0 | 0 | 0 |
| <i>Lamprophis_fuliginosus</i>   | 1 | 0 | 0 | 0 |
| <i>Lamprophis_fuscus</i>        | 1 | 0 | 0 | 0 |
| <i>Lamprophis_guttatus</i>      | 1 | 0 | 0 | 0 |
| <i>Lamprophis_inornatus</i>     | 1 | 0 | 0 | 0 |
| <i>Lamprophis_lineatus</i>      | 1 | 0 | 0 | 0 |
| <i>Lamprophis_olivaceus</i>     | 1 | 0 | 0 | 0 |
| <i>Lamprophis_swazicus</i>      | 1 | 0 | 0 | 0 |
| <i>Lamprophis_virgatus</i>      | 1 | 0 | 0 | 0 |
| <i>Lampropholis_coggeri</i>     | 1 | 0 | 0 | 0 |
| <i>Lampropholis_delicata</i>    | 1 | 0 | 0 | 0 |
| <i>Lampropholis_guichenoti</i>  | 1 | 0 | 0 | 0 |
| <i>Lampropholis_robertsi</i>    | 1 | 0 | 0 | 0 |
| <i>Langaha_madagascariensis</i> | 1 | 0 | 0 | 0 |
| <i>Lankascincus_fallax</i>      | 1 | 0 | 0 | 0 |
| <i>Lanthanotus_borneensis</i>   | 1 | 0 | 0 | 0 |
| <i>Lapemis_curtus</i>           | 0 | 0 | 0 | 0 |

|                                       |   |   |   |   |
|---------------------------------------|---|---|---|---|
| <i>Larutia_seribuatensis</i>          | 1 | 0 | 0 | 0 |
| <i>Latastia_longicaudata</i>          | 1 | 0 | 0 | 0 |
| <i>Laticauda_colubrina</i>            | 1 | 0 | 0 | 0 |
| <i>Laticauda_guineai</i>              | 1 | 0 | 0 | 0 |
| <i>Laticauda_laticaudata</i>          | 1 | 0 | 0 | 0 |
| <i>Laticauda_saintgironi</i>          | 1 | 0 | 0 | 0 |
| <i>Laudakia_caucasia</i>              | 1 | 0 | 0 | 0 |
| <i>Laudakia_erythrogastra</i>         | 1 | 0 | 0 | 0 |
| <i>Laudakia_himalayana</i>            | 1 | 0 | 0 | 0 |
| <i>Laudakia_lehmanni</i>              | 1 | 0 | 0 | 0 |
| <i>Laudakia_microlepis</i>            | 1 | 0 | 0 | 0 |
| <i>Laudakia_nupta</i>                 | 1 | 0 | 0 | 0 |
| <i>Laudakia_sacra</i>                 | 1 | 0 | 0 | 0 |
| <i>Laudakia_stellio</i>               | 1 | 0 | 0 | 0 |
| <i>Laudakia_stoliczkana</i>           | 1 | 0 | 0 | 0 |
| <i>Laudakia_tuberculata</i>           | 1 | 0 | 0 | 0 |
| <i>Leiocephalus_barahonensis</i>      | 1 | 0 | 0 | 0 |
| <i>Leiocephalus_carinatus</i>         | 1 | 0 | 0 | 0 |
| <i>Leiocephalus_personatus</i>        | 1 | 0 | 0 | 0 |
| <i>Leiocephalus_psammodromus</i>      | 1 | 0 | 0 | 0 |
| <i>Leiocephalus_raviceps</i>          | 1 | 0 | 0 | 0 |
| <i>Leiocephalus_schreibersi</i>       | - | 0 | 0 | 0 |
| <i>Leioheterodon_geayi</i>            | 1 | 0 | 0 | 0 |
| <i>Leioheterodon_madagascariensis</i> | 1 | 0 | 0 | 0 |
| <i>Leioheterodon_modestus</i>         | 1 | 0 | 0 | 0 |
| <i>Leiolepis_belliana</i>             | 1 | 0 | 0 | 0 |
| <i>Leiolepis_guentherpetersi</i>      | 1 | 0 | 0 | 0 |
| <i>Leiolepis_guttata</i>              | 1 | 0 | 0 | 0 |
| <i>Leiolepis_reevesii</i>             | 1 | 0 | 0 | 0 |
| <i>Leiopisma_mauritiana</i>           | - | 0 | 0 | 0 |
| <i>Leiopisma_telfairii</i>            | - | 0 | 0 | 0 |
| <i>Leiopython_albertisii</i>          | 1 | 0 | 0 | 0 |
| <i>Leiosaurus_bellii</i>              | 1 | 0 | 0 | 0 |
| <i>Leiosaurus_catamarcensis</i>       | 1 | 0 | 0 | 0 |
| <i>Leiosaurus_paronae</i>             | 1 | 0 | 0 | 0 |
| <i>Leioselasma_cyanocincta</i>        | - | 0 | 0 | 0 |
| <i>Leioselasma_czeblukovi</i>         | - | 0 | 0 | 0 |
| <i>Leioselasma_elegans</i>            | - | 0 | 0 | 0 |
| <i>Leioselasma_melanocephala</i>      | - | 0 | 0 | 0 |
| <i>Leioselasma_pacifica</i>           | - | 0 | 0 | 0 |
| <i>Leioselasma_semperi</i>            | - | 0 | 0 | 0 |
| <i>Leioselasma_spiralis</i>           | - | 0 | 0 | 0 |
| <i>Lepidoblepharis_festae</i>         | 1 | 1 | 0 | 0 |
| <i>Lepidoblepharis_sp._KU_218367</i>  | - | 1 | 0 | 0 |

|                                     |   |   |   |   |
|-------------------------------------|---|---|---|---|
| <i>Lepidoblepharis_xanthostigma</i> | 1 | 1 | 0 | 0 |
| <i>Lepidodactylus_lugubris</i>      | 1 | 1 | 0 | 0 |
| <i>Lepidodactylus_moestus</i>       | 1 | 1 | 0 | 0 |
| <i>Lepidodactylus_novaeguineae</i>  | 1 | 1 | 0 | 0 |
| <i>Lepidodactylus_orientalis</i>    | 1 | 1 | 0 | 0 |
| <i>Lepidophyma_cuicateca</i>        | 0 | 0 | 0 | 0 |
| <i>Lepidophyma_dontomasi</i>        | 0 | 0 | 0 | 0 |
| <i>Lepidophyma_flavimaculatum</i>   | 0 | 0 | 0 | 0 |
| <i>Lepidophyma_gaigeae</i>          | 0 | 0 | 0 | 0 |
| <i>Lepidophyma_lineri</i>           | 0 | 0 | 0 | 0 |
| <i>Lepidophyma_lipetzi</i>          | 0 | 0 | 0 | 0 |
| <i>Lepidophyma_lowei</i>            | 0 | 0 | 0 | 0 |
| <i>Lepidophyma_mayae</i>            | 0 | 0 | 0 | 0 |
| <i>Lepidophyma_micropholis</i>      | 0 | 0 | 0 | 0 |
| <i>Lepidophyma_occulor</i>          | 0 | 0 | 0 | 0 |
| <i>Lepidophyma_pajapanensis</i>     | 0 | 0 | 0 | 0 |
| <i>Lepidophyma_radula</i>           | 0 | 0 | 0 | 0 |
| <i>Lepidophyma_reticulatum</i>      | 0 | 0 | 0 | 0 |
| <i>Lepidophyma_smithii</i>          | 0 | 0 | 0 | 0 |
| <i>Lepidophyma_sylvaticum</i>       | 0 | 0 | 0 | 0 |
| <i>Lepidophyma_tuxtlae</i>          | 0 | 0 | 0 | 0 |
| <i>Lepidothyris_fernandi</i>        | 1 | 0 | 0 | 0 |
| <i>Leposoma_annectans</i>           | 1 | 0 | 0 | 0 |
| <i>Leposoma_baturitensis</i>        | 1 | 0 | 0 | 0 |
| <i>Leposoma_guianense</i>           | 1 | 0 | 0 | 0 |
| <i>Leposoma_nanodactylus</i>        | 1 | 0 | 0 | 0 |
| <i>Leposoma_osvaldoi</i>            | 1 | 0 | 0 | 0 |
| <i>Leposoma_parietale</i>           | 1 | 0 | 0 | 0 |
| <i>Leposoma_percarinatum</i>        | 1 | 0 | 0 | 0 |
| <i>Leposoma_puk</i>                 | 1 | 0 | 0 | 0 |
| <i>Leposoma_scincoides</i>          | 1 | 0 | 0 | 0 |
| <i>Leposoma_southi</i>              | 1 | 0 | 0 | 0 |
| <i>Leposternon_infraorbitale</i>    | 1 | 0 | 0 | 0 |
| <i>Leposternon_microcephalum</i>    | 1 | 0 | 0 | 0 |
| <i>Leposternon_polystegum</i>       | 1 | 0 | 0 | 0 |
| <i>Leptodeira_annulata</i>          | 1 | 0 | 0 | 0 |
| <i>Leptodeira_bakeri</i>            | 1 | 0 | 0 | 0 |
| <i>Leptodeira_frenata</i>           | 1 | 0 | 0 | 0 |
| <i>Leptodeira_maculata</i>          | 1 | 0 | 0 | 0 |
| <i>Leptodeira_nigrofasciata</i>     | 1 | 0 | 0 | 0 |
| <i>Leptodeira_punctata</i>          | 1 | 0 | 0 | 0 |
| <i>Leptodeira_rubricata</i>         | 1 | 0 | 0 | 0 |
| <i>Leptodeira_septentrionalis</i>   | 1 | 0 | 0 | 0 |
| <i>Leptodeira_splendida</i>         | 1 | 0 | 0 | 0 |

|                                     |   |   |   |   |
|-------------------------------------|---|---|---|---|
| <i>Leptodeira_uribei</i>            | - | 0 | 0 | 0 |
| <i>Leptomicrurus_narduccii</i>      | - | 0 | 0 | 0 |
| <i>Leptophis_ahaetulla</i>          | 1 | 0 | 0 | 0 |
| <i>Leptosiaphos_amieti</i>          | - | 0 | 0 | 0 |
| <i>Leptosiaphos_graueri</i>         | - | 0 | 0 | 0 |
| <i>Leptosiaphos_hackarsi</i>        | - | 0 | 0 | 0 |
| <i>Leptosiaphos_kilimensis</i>      | - | 0 | 0 | 0 |
| <i>Leptosiaphos_vigintiserierum</i> | - | 0 | 0 | 0 |
| <i>Leptotyphlops_conjunctus</i>     | 1 | 0 | 0 | 0 |
| <i>Leptotyphlops_distanti</i>       | 1 | 0 | 0 | 0 |
| <i>Leptotyphlops_kafubi</i>         | - | 0 | 0 | 0 |
| <i>Leptotyphlops_merkeri</i>        | - | 0 | 0 | 0 |
| <i>Leptotyphlops_nigricans</i>      | 1 | 0 | 0 | 0 |
| <i>Leptotyphlops_nigroterminus</i>  | 1 | 0 | 0 | 0 |
| <i>Leptotyphlops_pitmani</i>        | - | 0 | 0 | 0 |
| <i>Leptotyphlops_scutifrons</i>     | 1 | 0 | 0 | 0 |
| <i>Leptotyphlops_sylvicolus</i>     | 1 | 0 | 0 | 0 |
| <i>Lerista_aericeps</i>             | 1 | 0 | 0 | 0 |
| <i>Lerista_allochira</i>            | 1 | 0 | 0 | 0 |
| <i>Lerista_ameles</i>               | 1 | 0 | 0 | 0 |
| <i>Lerista_apoda</i>                | 1 | 0 | 0 | 0 |
| <i>Lerista_arenicola</i>            | 1 | 0 | 0 | 0 |
| <i>Lerista_axillaris</i>            | 1 | 0 | 0 | 0 |
| <i>Lerista_baynesi</i>              | 1 | 0 | 0 | 0 |
| <i>Lerista_bipes</i>                | 1 | 0 | 0 | 0 |
| <i>Lerista_borealis</i>             | 1 | 0 | 0 | 0 |
| <i>Lerista_bougainvillii</i>        | - | 0 | 0 | 0 |
| <i>Lerista_carpentariae</i>         | 1 | 0 | 0 | 0 |
| <i>Lerista_chordae</i>              | 1 | 0 | 0 | 0 |
| <i>Lerista_christinae</i>           | 1 | 0 | 0 | 0 |
| <i>Lerista_cinerea</i>              | 1 | 0 | 0 | 0 |
| <i>Lerista_connivens</i>            | 1 | 0 | 0 | 0 |
| <i>Lerista_desertorum</i>           | 1 | 0 | 0 | 0 |
| <i>Lerista_distinguenda</i>         | 1 | 0 | 0 | 0 |
| <i>Lerista_dorsalis</i>             | 1 | 0 | 0 | 0 |
| <i>Lerista_edwardsae</i>            | 1 | 0 | 0 | 0 |
| <i>Lerista_elegans</i>              | 1 | 0 | 0 | 0 |
| <i>Lerista_elongata</i>             | 1 | 0 | 0 | 0 |
| <i>Lerista_emmotti</i>              | 1 | 0 | 0 | 0 |
| <i>Lerista_eupoda</i>               | 1 | 0 | 0 | 0 |
| <i>Lerista_flammicauda</i>          | 1 | 0 | 0 | 0 |
| <i>Lerista_fragilis</i>             | 1 | 0 | 0 | 0 |
| <i>Lerista_frosti</i>               | 1 | 0 | 0 | 0 |
| <i>Lerista_gascoynensis</i>         | 1 | 0 | 0 | 0 |



|                                |   |   |   |   |
|--------------------------------|---|---|---|---|
| <i>Lerista_gerrardii</i>       | 1 | 0 | 0 | 0 |
| <i>Lerista_greeri</i>          | 1 | 0 | 0 | 0 |
| <i>Lerista_griffini</i>        | 1 | 0 | 0 | 0 |
| <i>Lerista_haroldi</i>         | 1 | 0 | 0 | 0 |
| <i>Lerista_humphriesi</i>      | 1 | 0 | 0 | 0 |
| <i>Lerista_ingrami</i>         | 1 | 0 | 0 | 0 |
| <i>Lerista_ips</i>             | 1 | 0 | 0 | 0 |
| <i>Lerista_kalumburu</i>       | 1 | 0 | 0 | 0 |
| <i>Lerista_karlschmidti</i>    | 1 | 0 | 0 | 0 |
| <i>Lerista_kendricki</i>       | 1 | 0 | 0 | 0 |
| <i>Lerista_kennedyensis</i>    | 1 | 0 | 0 | 0 |
| <i>Lerista_labialis</i>        | 1 | 0 | 0 | 0 |
| <i>Lerista_lineata</i>         | 1 | 0 | 0 | 0 |
| <i>Lerista_lineopunctulata</i> | 1 | 0 | 0 | 0 |
| <i>Lerista_macropisthopus</i>  | 1 | 0 | 0 | 0 |
| <i>Lerista_microtis</i>        | 0 | 0 | 0 | 0 |
| <i>Lerista_muelleri</i>        | 1 | 0 | 0 | 0 |
| <i>Lerista_neander</i>         | 1 | 0 | 0 | 0 |
| <i>Lerista_nichollsi</i>       | 1 | 0 | 0 | 0 |
| <i>Lerista_onsloviana</i>      | 1 | 0 | 0 | 0 |
| <i>Lerista_orientalis</i>      | 1 | 0 | 0 | 0 |
| <i>Lerista_petersoni</i>       | 1 | 0 | 0 | 0 |
| <i>Lerista_picturata</i>       | 1 | 0 | 0 | 0 |
| <i>Lerista_planiventralis</i>  | 1 | 0 | 0 | 0 |
| <i>Lerista_praepedita</i>      | 1 | 0 | 0 | 0 |
| <i>Lerista_punctatovittata</i> | 1 | 0 | 0 | 0 |
| <i>Lerista_puncticauda</i>     | 1 | 0 | 0 | 0 |
| <i>Lerista_robusta</i>         | 1 | 0 | 0 | 0 |
| <i>Lerista_simillima</i>       | 1 | 0 | 0 | 0 |
| <i>Lerista_speciosa</i>        | 1 | 0 | 0 | 0 |
| <i>Lerista_stictopleura</i>    | 1 | 0 | 0 | 0 |
| <i>Lerista_stylis</i>          | 1 | 0 | 0 | 0 |
| <i>Lerista_taeiniata</i>       | 1 | 0 | 0 | 0 |
| <i>Lerista_terdigitata</i>     | 1 | 0 | 0 | 0 |
| <i>Lerista_tridactyla</i>      | 1 | 0 | 0 | 0 |
| <i>Lerista_uniduo</i>          | 1 | 0 | 0 | 0 |
| <i>Lerista_varia</i>           | 1 | 0 | 0 | 0 |
| <i>Lerista_vermicularis</i>    | 1 | 0 | 0 | 0 |
| <i>Lerista_viduata</i>         | 1 | 0 | 0 | 0 |
| <i>Lerista_walkeri</i>         | 1 | 0 | 0 | 0 |
| <i>Lerista_wilkinsi</i>        | 1 | 0 | 0 | 0 |
| <i>Lerista_xanthura</i>        | 1 | 0 | 0 | 0 |
| <i>Lerista_yuna</i>            | 1 | 0 | 0 | 0 |
| <i>Lerista_zietzi</i>          | 1 | 0 | 0 | 0 |

|                                   |   |   |   |   |
|-----------------------------------|---|---|---|---|
| <i>Lerista_zonulata</i>           | 1 | 0 | 0 | 0 |
| <i>Letheobia_obtusa</i>           | 1 | 0 | 0 | 0 |
| <i>Letheobia_unitaeniata</i>      | 1 | 0 | 0 | 0 |
| <i>Lialis_burtonis</i>            | 1 | 0 | 0 | 0 |
| <i>Lialis_jicari</i>              | 1 | 0 | 0 | 0 |
| <i>Liasis_fuscus</i>              | 1 | 0 | 0 | 0 |
| <i>Liasis_mackloti</i>            | 1 | 0 | 0 | 0 |
| <i>Liasis_olivaceus</i>           | 1 | 0 | 0 | 0 |
| <i>Liolaemus_abaucan</i>          | 1 | 0 | 0 | 0 |
| <i>Liolaemus_albiceps</i>         | 0 | 0 | 0 | 0 |
| <i>Liolaemus_andinus</i>          | 0 | 0 | 0 | 0 |
| <i>Liolaemus_archeforus</i>       | 0 | 0 | 0 | 0 |
| <i>Liolaemus_atacamensis</i>      | 1 | 0 | 0 | 0 |
| <i>Liolaemus_audituvelatus</i>    | 0 | 0 | 0 | 0 |
| <i>Liolaemus_austromendocinus</i> | 0 | 0 | 0 | 0 |
| <i>Liolaemus_azarai</i>           | 1 | 0 | 0 | 0 |
| <i>Liolaemus_baguali</i>          | 0 | 0 | 0 | 0 |
| <i>Liolaemus_bellii</i>           | 0 | 0 | 0 | 0 |
| <i>Liolaemus_bibronii</i>         | 1 | 0 | 0 | 0 |
| <i>Liolaemus_bitaeniatus</i>      | 1 | 0 | 0 | 0 |
| <i>Liolaemus_boulengeri</i>       | 1 | 0 | 0 | 0 |
| <i>Liolaemus_buergeri</i>         | 0 | 0 | 0 | 0 |
| <i>Liolaemus_calchaqui</i>        | 1 | 0 | 0 | 0 |
| <i>Liolaemus_canqueli</i>         | 1 | 0 | 0 | 0 |
| <i>Liolaemus_capillitas</i>       | 0 | 0 | 0 | 0 |
| <i>Liolaemus_ceii</i>             | 0 | 0 | 0 | 0 |
| <i>Liolaemus_chacoensis</i>       | 1 | 0 | 0 | 0 |
| <i>Liolaemus_chaltin</i>          | 1 | 0 | 0 | 0 |
| <i>Liolaemus_chehuachekenk</i>    | - | 0 | 0 | 0 |
| <i>Liolaemus_chiliensis</i>       | 1 | 0 | 0 | 0 |
| <i>Liolaemus_coeruleus</i>        | 1 | 0 | 0 | 0 |
| <i>Liolaemus_crepuscularis</i>    | 0 | 0 | 0 | 0 |
| <i>Liolaemus_cuyanus</i>          | 1 | 0 | 0 | 0 |
| <i>Liolaemus_cyanogaster</i>      | 0 | 0 | 0 | 0 |
| <i>Liolaemus_darwinii</i>         | 1 | 0 | 0 | 0 |
| <i>Liolaemus_dicktracy</i>        | 0 | 0 | 0 | 0 |
| <i>Liolaemus_donosobarrosi</i>    | 1 | 0 | 0 | 0 |
| <i>Liolaemus_dorbignyi</i>        | 0 | 0 | 0 | 0 |
| <i>Liolaemus_elongatus</i>        | 0 | 0 | 0 | 0 |
| <i>Liolaemus_escarchadosi</i>     | 0 | 0 | 0 | 0 |
| <i>Liolaemus_espinozai</i>        | 0 | 0 | 0 | 0 |
| <i>Liolaemus_fabiani</i>          | 0 | 0 | 0 | 0 |
| <i>Liolaemus_famatinae</i>        | 0 | 0 | 0 | 0 |
| <i>Liolaemus_fitzingerii</i>      | 1 | 0 | 0 | 0 |

|                                    |   |   |   |   |
|------------------------------------|---|---|---|---|
| <i>Liolaemus_fuscus</i>            | 1 | 0 | 0 | 0 |
| <i>Liolaemus_gallardoii</i>        | 0 | 0 | 0 | 0 |
| <i>Liolaemus_gracilis</i>          | 1 | 0 | 0 | 0 |
| <i>Liolaemus_gravenhorstii</i>     | 0 | 0 | 0 | 0 |
| <i>Liolaemus_grosseorum</i>        | 1 | 0 | 0 | 0 |
| <i>Liolaemus_hatcheri</i>          | 0 | 0 | 0 | 0 |
| <i>Liolaemus_helioderms</i>        | - | 0 | 0 | 0 |
| <i>Liolaemus_hermannunezi</i>      | - | 0 | 0 | 0 |
| <i>Liolaemus_hernani</i>           | - | 0 | 0 | 0 |
| <i>Liolaemus_huacahuasicus</i>     | 0 | 0 | 0 | 0 |
| <i>Liolaemus_inacayali</i>         | - | 0 | 0 | 0 |
| <i>Liolaemus_irregularis</i>       | 0 | 0 | 0 | 0 |
| <i>Liolaemus_kingii</i>            | 0 | 0 | 0 | 0 |
| <i>Liolaemus_kolengh</i>           | 0 | 0 | 0 | 0 |
| <i>Liolaemus_koslowskyi</i>        | 1 | 0 | 0 | 0 |
| <i>Liolaemus_kriegi</i>            | 0 | 0 | 0 | 0 |
| <i>Liolaemus_laurenti</i>          | 1 | 0 | 0 | 0 |
| <i>Liolaemus_lavillai</i>          | 0 | 0 | 0 | 0 |
| <i>Liolaemus_lemniscatus</i>       | 1 | 0 | 0 | 0 |
| <i>Liolaemus_leopardinus</i>       | 0 | 0 | 0 | 0 |
| <i>Liolaemus_lineomaculatus</i>    | 0 | 0 | 0 | 0 |
| <i>Liolaemus_lutzae</i>            | 1 | 0 | 0 | 0 |
| <i>Liolaemus_magellanicus</i>      | 0 | 0 | 0 | 0 |
| <i>Liolaemus_melanops</i>          | 1 | 0 | 0 | 0 |
| <i>Liolaemus_molinai</i>           | 0 | 0 | 0 | 0 |
| <i>Liolaemus_monticola</i>         | 1 | 0 | 0 | 0 |
| <i>Liolaemus_morenoi</i>           | 1 | 0 | 0 | 0 |
| <i>Liolaemus_multicolor</i>        | 0 | 0 | 0 | 0 |
| <i>Liolaemus_multimaculatus</i>    | 1 | 0 | 0 | 0 |
| <i>Liolaemus_nigromaculatus</i>    | 1 | 0 | 0 | 0 |
| <i>Liolaemus_nigroviridis</i>      | 0 | 0 | 0 | 0 |
| <i>Liolaemus_nitidus</i>           | 1 | 0 | 0 | 0 |
| <i>Liolaemus_occipitalis</i>       | 1 | 0 | 0 | 0 |
| <i>Liolaemus_olongasta</i>         | 1 | 0 | 0 | 0 |
| <i>Liolaemus_orientalis</i>        | 0 | 0 | 0 | 0 |
| <i>Liolaemus_ornatus</i>           | 0 | 0 | 0 | 0 |
| <i>Liolaemus_pagaburoi</i>         | 0 | 0 | 0 | 0 |
| <i>Liolaemus_paulinae</i>          | 0 | 0 | 0 | 0 |
| <i>Liolaemus_petrophilus</i>       | 0 | 0 | 0 | 0 |
| <i>Liolaemus_pictus</i>            | 0 | 0 | 0 | 0 |
| <i>Liolaemus_platei</i>            | 1 | 0 | 0 | 0 |
| <i>Liolaemus_pseudoanomalous</i>   | 1 | 0 | 0 | 0 |
| <i>Liolaemus_pseudolemniscatus</i> | 1 | 0 | 0 | 0 |
| <i>Liolaemus_puna</i>              | 0 | 0 | 0 | 0 |

|                                 |   |   |   |   |
|---------------------------------|---|---|---|---|
| <i>Liolaemus_quilmes</i>        | 1 | 0 | 0 | 0 |
| <i>Liolaemus_ramirezae</i>      | 1 | 0 | 0 | 0 |
| <i>Liolaemus_reichei</i>        | 1 | 0 | 0 | 0 |
| <i>Liolaemus_riojanus</i>       | 1 | 0 | 0 | 0 |
| <i>Liolaemus_robertmertensi</i> | 1 | 0 | 0 | 0 |
| <i>Liolaemus_rothi</i>          | 1 | 0 | 0 | 0 |
| <i>Liolaemus_ruibali</i>        | 0 | 0 | 0 | 0 |
| <i>Liolaemus_salinicola</i>     | 1 | 0 | 0 | 0 |
| <i>Liolaemus_sarmientoi</i>     | 0 | 0 | 0 | 0 |
| <i>Liolaemus_saxatilis</i>      | 1 | 0 | 0 | 0 |
| <i>Liolaemus_scapularis</i>     | 1 | 0 | 0 | 0 |
| <i>Liolaemus_schroederi</i>     | 0 | 0 | 0 | 0 |
| <i>Liolaemus_scolaroi</i>       | 0 | 0 | 0 | 0 |
| <i>Liolaemus_silvanae</i>       | 0 | 0 | 0 | 0 |
| <i>Liolaemus_somuncurae</i>     | 0 | 0 | 0 | 0 |
| <i>Liolaemus_tari</i>           | 0 | 0 | 0 | 0 |
| <i>Liolaemus_telsen</i>         | 1 | 0 | 0 | 0 |
| <i>Liolaemus_tenuis</i>         | 1 | 0 | 0 | 0 |
| <i>Liolaemus_thermarum</i>      | - | 0 | 0 | 0 |
| <i>Liolaemus_tristis</i>        | - | 0 | 0 | 0 |
| <i>Liolaemus_umbrifer</i>       | 0 | 0 | 0 | 0 |
| <i>Liolaemus_uptoni</i>         | 0 | 0 | 0 | 0 |
| <i>Liolaemus_uspallatensis</i>  | 1 | 0 | 0 | 0 |
| <i>Liolaemus_vallecurensis</i>  | 0 | 0 | 0 | 0 |
| <i>Liolaemus_walkeri</i>        | 0 | 0 | 0 | 0 |
| <i>Liolaemus_wiegmannii</i>     | 1 | 0 | 0 | 0 |
| <i>Liolaemus_xanthoviridis</i>  | 1 | 0 | 0 | 0 |
| <i>Liolaemus_yanalcu</i>        | 1 | 0 | 0 | 0 |
| <i>Liolaemus_zapallarensis</i>  | 1 | 0 | 0 | 0 |
| <i>Liolaemus_zullyae</i>        | - | 0 | 0 | 0 |
| <i>Liophidium_chabaudi</i>      | 1 | 0 | 0 | 0 |
| <i>Liophidium_mayottensis</i>   | 1 | 0 | 0 | 0 |
| <i>Liophidium_rhodogaster</i>   | 1 | 0 | 0 | 0 |
| <i>Liophidium_therezieni</i>    | 1 | 0 | 0 | 0 |
| <i>Liophidium_torquatum</i>     | 1 | 0 | 0 | 0 |
| <i>Liophidium_vaillanti</i>     | 1 | 0 | 0 | 0 |
| <i>Liophis_breviceps</i>        | 1 | 0 | 0 | 0 |
| <i>Liophis_elegantissimus</i>   | 1 | 0 | 0 | 0 |
| <i>Liophis_epinephelus</i>      | 1 | 0 | 0 | 0 |
| <i>Liophis_jaegeri</i>          | 1 | 0 | 0 | 0 |
| <i>Liophis_juliae</i>           | 1 | 0 | 0 | 0 |
| <i>Liophis_lineatus</i>         | 1 | 0 | 0 | 0 |
| <i>Liophis_meridionalis</i>     | 1 | 0 | 0 | 0 |
| <i>Liophis_miliaris</i>         | 1 | 0 | 0 | 0 |

|                                    |   |   |   |   |
|------------------------------------|---|---|---|---|
| <i>Liophis_poecilogyrus</i>        | 1 | 0 | 0 | 0 |
| <i>Liophis_reginae</i>             | 1 | 0 | 0 | 0 |
| <i>Liophis_typhlus</i>             | 1 | 0 | 0 | 0 |
| <i>Liopholidophis_dimorphus</i>    | 1 | 0 | 0 | 0 |
| <i>Liopholidophis_dolicocercus</i> | 1 | 0 | 0 | 0 |
| <i>Liopholidophis_sexlineatus</i>  | 0 | 0 | 0 | 0 |
| <i>Liopholis_striata</i>           | - | 0 | 0 | 0 |
| <i>Lioscincus_maruia</i>           | - | 0 | 0 | 0 |
| <i>Lioscincus_nigrofasciolatum</i> | - | 0 | 0 | 0 |
| <i>Lioscincus_novaecaledoniae</i>  | - | 0 | 0 | 0 |
| <i>Lioscincus_steindachneri</i>    | - | 0 | 0 | 0 |
| <i>Lioscincus_tillieri</i>         | - | 0 | 0 | 0 |
| <i>Lioscincus_vivae</i>            | - | 0 | 0 | 0 |
| <i>Liotyphlops_albirostris</i>     | 1 | 0 | 0 | 0 |
| <i>Lipinia_noctua</i>              | 0 | 0 | 0 | 0 |
| <i>Lipinia_pulchella</i>           | 1 | 0 | 0 | 0 |
| <i>Lipinia_vittigera</i>           | 1 | 0 | 0 | 0 |
| <i>Lissolepis_coventryi</i>        | - | 0 | 0 | 0 |
| <i>Lophognathus_gilberti</i>       | 1 | 0 | 0 | 0 |
| <i>Lophognathus_longirostris</i>   | 1 | 0 | 0 | 0 |
| <i>Lophognathus_temporalis</i>     | 1 | 0 | 0 | 0 |
| <i>Loxocemus_bicolor</i>           | 1 | 0 | 0 | 0 |
| <i>Lucasium_alboguttatum</i>       | 1 | 0 | 0 | 0 |
| <i>Lucasium_byrnei</i>             | 1 | 0 | 0 | 0 |
| <i>Lucasium_damaeum</i>            | 1 | 0 | 0 | 0 |
| <i>Lucasium_immaculatum</i>        | 1 | 0 | 0 | 0 |
| <i>Lucasium_maini</i>              | 1 | 0 | 0 | 0 |
| <i>Lucasium_squarrosus</i>         | 1 | 0 | 0 | 0 |
| <i>Lucasium_steindachneri</i>      | 1 | 0 | 0 | 0 |
| <i>Lucasium_stenodactylum</i>      | 1 | 0 | 0 | 0 |
| <i>Lucasium_wombeyi</i>            | 1 | 0 | 0 | 0 |
| <i>Luperosaurus_cumingii</i>       | 1 | 1 | 0 | 0 |
| <i>Luperosaurus_iskandari</i>      | 1 | 1 | 0 | 0 |
| <i>Luperosaurus_joloensis</i>      | 1 | 1 | 0 | 0 |
| <i>Luperosaurus_macgregori</i>     | 1 | 1 | 0 | 0 |
| <i>Lycodon_aulicus</i>             | 1 | 0 | 0 | 0 |
| <i>Lycodon_capucinus</i>           | 1 | 0 | 0 | 0 |
| <i>Lycodon_fasciatus</i>           | 1 | 0 | 0 | 0 |
| <i>Lycodon_laoensis</i>            | 1 | 0 | 0 | 0 |
| <i>Lycodon_osmanhilli</i>          | 1 | 0 | 0 | 0 |
| <i>Lycodon_paucifasciatus</i>      | 1 | 0 | 0 | 0 |
| <i>Lycodon_ruhstrati</i>           | 1 | 0 | 0 | 0 |
| <i>Lycodon_zawi</i>                | 1 | 0 | 0 | 0 |
| <i>Lycodonomorphus_laevissimus</i> | - | 0 | 0 | 0 |

|                                      |   |   |   |   |
|--------------------------------------|---|---|---|---|
| <i>Lycodonomorphus_rufulus</i>       | 1 | 0 | 0 | 0 |
| <i>Lycodonomorphus_whytii</i>        | 1 | 0 | 0 | 0 |
| <i>Lycodryas_citrinus</i>            | - | 0 | 0 | 0 |
| <i>Lycodryas_granuliceps</i>         | - | 0 | 0 | 0 |
| <i>Lycodryas_inopinae</i>            | - | 0 | 0 | 0 |
| <i>Lycodryas_inornatus</i>           | - | 0 | 0 | 0 |
| <i>Lycodryas_pseudogranuliceps</i>   | - | 0 | 0 | 0 |
| <i>Lycodryas_sanctijohannis</i>      | 0 | 0 | 0 | 0 |
| <i>Lycognathophis_seychellensis</i>  | 1 | 0 | 0 | 0 |
| <i>Lycophidion_capense</i>           | 1 | 0 | 0 | 0 |
| <i>Lycophidion_laterale</i>          | 1 | 0 | 0 | 0 |
| <i>Lycophidion_nigromaculatum</i>    | 1 | 0 | 0 | 0 |
| <i>Lycophidion_ornatum</i>           | 1 | 0 | 0 | 0 |
| <i>Lygisaurus_absconditus</i>        | - | 0 | 0 | 0 |
| <i>Lygisaurus_aeratus</i>            | - | 0 | 0 | 0 |
| <i>Lygisaurus_foliorum</i>           | 1 | 0 | 0 | 0 |
| <i>Lygisaurus_laevis</i>             | - | 0 | 0 | 0 |
| <i>Lygisaurus_macfarlani</i>         | - | 0 | 0 | 0 |
| <i>Lygisaurus_malleolus</i>          | - | 0 | 0 | 0 |
| <i>Lygisaurus_novaeguineae</i>       | - | 0 | 0 | 0 |
| <i>Lygisaurus_sesbrauna</i>          | - | 0 | 0 | 0 |
| <i>Lygisaurus_tanneri</i>            | - | 0 | 0 | 0 |
| <i>Lygodactylus_angularis</i>        | 1 | 1 | 0 | 0 |
| <i>Lygodactylus_arnoulti</i>         | 1 | 1 | 0 | 0 |
| <i>Lygodactylus_blancae</i>          | 1 | 1 | 0 | 0 |
| <i>Lygodactylus_bradfieldi</i>       | 1 | 1 | 0 | 0 |
| <i>Lygodactylus_capensis</i>         | 1 | 1 | 0 | 0 |
| <i>Lygodactylus_chobiensis</i>       | 1 | 1 | 0 | 0 |
| <i>Lygodactylus_conraui</i>          | 1 | 1 | 0 | 0 |
| <i>Lygodactylus_expectatus</i>       | 1 | 1 | 0 | 0 |
| <i>Lygodactylus_gravis</i>           | 1 | 1 | 0 | 0 |
| <i>Lygodactylus_guibeii</i>          | 1 | 1 | 0 | 0 |
| <i>Lygodactylus_gutturalis</i>       | 1 | 1 | 0 | 0 |
| <i>Lygodactylus_heterurus</i>        | 1 | 1 | 0 | 0 |
| <i>Lygodactylus_keniensis</i>        | 1 | 1 | 0 | 0 |
| <i>Lygodactylus_kimhowelli</i>       | 1 | 1 | 0 | 0 |
| <i>Lygodactylus_klugei</i>           | 1 | 1 | 0 | 0 |
| <i>Lygodactylus_lawrencei</i>        | 1 | 1 | 0 | 0 |
| <i>Lygodactylus_madagascariensis</i> | 1 | 1 | 0 | 0 |
| <i>Lygodactylus_miops</i>            | 1 | 1 | 0 | 0 |
| <i>Lygodactylus_mirabilis</i>        | 1 | 1 | 0 | 0 |
| <i>Lygodactylus_montanus</i>         | 1 | 1 | 0 | 0 |
| <i>Lygodactylus_pauliani</i>         | 1 | 1 | 0 | 0 |
| <i>Lygodactylus_picturatus</i>       | 1 | 1 | 0 | 0 |

|                                     |   |   |   |   |
|-------------------------------------|---|---|---|---|
| <i>Lygodactylus_pictus</i>          | 1 | 1 | 0 | 0 |
| <i>Lygodactylus_rarus</i>           | 1 | 1 | 0 | 0 |
| <i>Lygodactylus_sp._AC-2011</i>     | - | 1 | 0 | 0 |
| <i>Lygodactylus_stevensoni</i>      | 1 | 1 | 0 | 0 |
| <i>Lygodactylus_thomensis</i>       | 1 | 1 | 0 | 0 |
| <i>Lygodactylus_tolampyae</i>       | 1 | 1 | 0 | 0 |
| <i>Lygodactylus_tuberosus</i>       | 1 | 1 | 0 | 0 |
| <i>Lygodactylus_verticillatus</i>   | 1 | 1 | 0 | 0 |
| <i>Lygodactylus_williamsi</i>       | 1 | 1 | 0 | 0 |
| <i>Lygophis_anomalus</i>            | - | 0 | 0 | 0 |
| <i>Lygosoma_afrum</i>               | 1 | 0 | 0 | 0 |
| <i>Lygosoma_albopunctata</i>        | - | 0 | 0 | 0 |
| <i>Lygosoma_bowringii</i>           | 1 | 0 | 0 | 0 |
| <i>Lygosoma_koratense</i>           | - | 0 | 0 | 0 |
| <i>Lygosoma_lineolatum</i>          | - | 0 | 0 | 0 |
| <i>Lygosoma_punctata</i>            | 1 | 0 | 0 | 0 |
| <i>Lygosoma_quadripes</i>           | - | 0 | 0 | 0 |
| <i>Lyriocephalus_scutatus</i>       | 1 | 0 | 0 | 0 |
| <i>Lystrophis_dorbignyi</i>         | 1 | 0 | 0 | 0 |
| <i>Lystrophis_semicinctus</i>       | 1 | 0 | 0 | 0 |
| <i>Lytorhynchus_diadema</i>         | 1 | 0 | 0 | 0 |
| <i>Mabuya_cumingi</i>               | - | 0 | 0 | 0 |
| <i>Mabuya_mabouya</i>               | 0 | 0 | 0 | 0 |
| <i>Mabuya_macrophthalma</i>         | - | 0 | 0 | 0 |
| <i>Mabuya_rudis</i>                 | - | 0 | 0 | 0 |
| <i>Mabuya_unimarginata</i>          | 0 | 0 | 0 | 0 |
| <i>Macrelaps_microlepidotus</i>     | 1 | 0 | 0 | 0 |
| <i>Macropisthodon_rudis</i>         | 1 | 0 | 0 | 0 |
| <i>Macroprotodon_abubakeri</i>      | 1 | 0 | 0 | 0 |
| <i>Macroprotodon_cucullatus</i>     | 1 | 0 | 0 | 0 |
| <i>Macrovipera_deserti</i>          | 1 | 0 | 0 | 0 |
| <i>Macrovipera_lebetina</i>         | 1 | 0 | 0 | 0 |
| <i>Macrovipera_mauritanica</i>      | 1 | 0 | 0 | 0 |
| <i>Macrovipera_schweizeri</i>       | 1 | 0 | 0 | 0 |
| <i>Madagascarophis_colubrinus</i>   | 1 | 0 | 0 | 0 |
| <i>Madagascarophis_meridionalis</i> | 1 | 0 | 0 | 0 |
| <i>Madascincus_igneocaudatus</i>    | - | 0 | 0 | 0 |
| <i>Madascincus_intermedius</i>      | - | 0 | 0 | 0 |
| <i>Madascincus_melanopleura</i>     | 1 | 0 | 0 | 0 |
| <i>Madascincus_mouroundavae</i>     | - | 0 | 0 | 0 |
| <i>Madascincus_polleni</i>          | - | 0 | 0 | 0 |
| <i>Madascincus_stumpffi</i>         | - | 0 | 0 | 0 |
| <i>Malpolon_moilensis</i>           | 1 | 0 | 0 | 0 |
| <i>Malpolon_monspessulanus</i>      | 1 | 0 | 0 | 0 |

|                                 |   |   |   |   |
|---------------------------------|---|---|---|---|
| <i>Manciola_guaporicola</i>     | - | 0 | 0 | 0 |
| <i>Manolepis_putnami</i>        | - | 0 | 0 | 0 |
| <i>Mantheyus_phuwuanensis</i>   | 1 | 0 | 0 | 0 |
| <i>Maracaiba_meridensis</i>     | - | 0 | 0 | 0 |
| <i>Marisora_falconensis</i>     | - | 0 | 0 | 0 |
| <i>Marmorosphax_montana</i>     | - | 0 | 0 | 0 |
| <i>Marmorosphax_tricolor</i>    | 0 | 0 | 0 | 0 |
| <i>Masticophis_flagellum</i>    | 1 | 0 | 0 | 0 |
| <i>Mastigodryas_bifossatus</i>  | 1 | 0 | 0 | 0 |
| <i>Mastigodryas_boddaerti</i>   | 1 | 0 | 0 | 0 |
| <i>Mastigodryas_melanolomus</i> | 1 | 0 | 0 | 0 |
| <i>Maticora_bivirgata</i>       | - | 0 | 0 | 0 |
| <i>Matoatoa_brevipes</i>        | 1 | 1 | 0 | 0 |
| <i>Mediodactylus_russowii</i>   | - | 1 | 0 | 0 |
| <i>Mediodactylus_spinicauda</i> | - | 1 | 0 | 0 |
| <i>Megatyphlops_mucruso</i>     | - | 0 | 0 | 0 |
| <i>Megatyphlops_schlegelii</i>  | - | 0 | 0 | 0 |
| <i>Mehelya_capensis</i>         | 1 | 0 | 0 | 0 |
| <i>Mehelya_nyassae</i>          | 1 | 0 | 0 | 0 |
| <i>Mehelya_poensis</i>          | 1 | 0 | 0 | 0 |
| <i>Mehelya_stenophthalmus</i>   | 1 | 0 | 0 | 0 |
| <i>Melanophidium_punctatum</i>  | 0 | 0 | 0 | 0 |
| <i>Melanoseps_ater</i>          | 0 | 0 | 0 | 0 |
| <i>Melanoseps_loveridgei</i>    | 0 | 0 | 0 | 0 |
| <i>Melanoseps_occidentalis</i>  | 0 | 0 | 0 | 0 |
| <i>Menetia_alanae</i>           | 1 | 0 | 0 | 0 |
| <i>Menetia_greyii</i>           | 1 | 0 | 0 | 0 |
| <i>Menetia_timlowi</i>          | 1 | 0 | 0 | 0 |
| <i>Meroles_anchietae</i>        | 1 | 0 | 0 | 0 |
| <i>Meroles_ctenodactylus</i>    | 1 | 0 | 0 | 0 |
| <i>Meroles_cuneirostris</i>     | 1 | 0 | 0 | 0 |
| <i>Meroles_knoxii</i>           | 1 | 0 | 0 | 0 |
| <i>Meroles_micropholidotus</i>  | 1 | 0 | 0 | 0 |
| <i>Meroles_reticulatus</i>      | 1 | 0 | 0 | 0 |
| <i>Meroles_suborbitalis</i>     | 1 | 0 | 0 | 0 |
| <i>Mesalina_adramitana</i>      | 1 | 0 | 0 | 0 |
| <i>Mesalina_bahaeldini</i>      | 1 | 0 | 0 | 0 |
| <i>Mesalina_balfouri</i>        | 1 | 0 | 0 | 0 |
| <i>Mesalina_brevirostris</i>    | 1 | 0 | 0 | 0 |
| <i>Mesalina_guttulata</i>       | 1 | 0 | 0 | 0 |
| <i>Mesalina_olivieri</i>        | 1 | 0 | 0 | 0 |
| <i>Mesalina_rubropunctata</i>   | 1 | 0 | 0 | 0 |
| <i>Mesalina_simoni</i>          | 1 | 0 | 0 | 0 |
| <i>Mesalina_watsonana</i>       | 1 | 0 | 0 | 0 |



|                                    |   |   |   |   |
|------------------------------------|---|---|---|---|
| <i>Mesaspis_gadovii</i>            | 0 | 0 | 0 | 0 |
| <i>Mesaspis_moreletii</i>          | 0 | 0 | 0 | 0 |
| <i>Mesoscincus_managuae</i>        | - | 0 | 0 | 0 |
| <i>Mesoscincus_schwartzei</i>      | - | 0 | 0 | 0 |
| <i>Micrablepharus_atticolus</i>    | 1 | 0 | 0 | 0 |
| <i>Micrablepharus_maximiliani</i>  | 1 | 0 | 0 | 0 |
| <i>Micrelaps_bicoloratus</i>       | 1 | 0 | 0 | 0 |
| <i>Microlophus_albemarlensis</i>   | 1 | 0 | 0 | 0 |
| <i>Microlophus_atacamensis</i>     | 1 | 0 | 0 | 0 |
| <i>Microlophus_bivittatus</i>      | 1 | 0 | 0 | 0 |
| <i>Microlophus_delanonis</i>       | 1 | 0 | 0 | 0 |
| <i>Microlophus_duncanensis</i>     | 1 | 0 | 0 | 0 |
| <i>Microlophus_grayii</i>          | 1 | 0 | 0 | 0 |
| <i>Microlophus_habelii</i>         | 1 | 0 | 0 | 0 |
| <i>Microlophus_heterolepis</i>     | 1 | 0 | 0 | 0 |
| <i>Microlophus_indefatigabilis</i> | - | 0 | 0 | 0 |
| <i>Microlophus_jacobi</i>          | - | 0 | 0 | 0 |
| <i>Microlophus_koepckeorum</i>     | 1 | 0 | 0 | 0 |
| <i>Microlophus_occipitalis</i>     | 1 | 0 | 0 | 0 |
| <i>Microlophus_pacificus</i>       | 1 | 0 | 0 | 0 |
| <i>Microlophus_peruvianus</i>      | 1 | 0 | 0 | 0 |
| <i>Microlophus_quadrivittatus</i>  | 1 | 0 | 0 | 0 |
| <i>Microlophus_stolzmanni</i>      | 1 | 0 | 0 | 0 |
| <i>Microlophus_theresiae</i>       | 1 | 0 | 0 | 0 |
| <i>Microlophus_theresioides</i>    | 1 | 0 | 0 | 0 |
| <i>Microlophus_thoracicus</i>      | 1 | 0 | 0 | 0 |
| <i>Microlophus_tigris</i>          | 1 | 0 | 0 | 0 |
| <i>Microlophus_yanezi</i>          | 1 | 0 | 0 | 0 |
| <i>Micropechis_ikaheka</i>         | 1 | 0 | 0 | 0 |
| <i>Micropisthodon_ochraceus</i>    | 1 | 0 | 0 | 0 |
| <i>Micruroides_euryxanthus</i>     | 1 | 0 | 0 | 0 |
| <i>Micrurus_albicinctus</i>        | 1 | 0 | 0 | 0 |
| <i>Micrurus_altirostris</i>        | 1 | 0 | 0 | 0 |
| <i>Micrurus_baliocoryphus</i>      | 1 | 0 | 0 | 0 |
| <i>Micrurus_brasiliensis</i>       | 1 | 0 | 0 | 0 |
| <i>Micrurus_corallinus</i>         | 1 | 0 | 0 | 0 |
| <i>Micrurus_decoratus</i>          | 1 | 0 | 0 | 0 |
| <i>Micrurus_diastema</i>           | 1 | 0 | 0 | 0 |
| <i>Micrurus_dissoleucus</i>        | 1 | 0 | 0 | 0 |
| <i>Micrurus_frontalis</i>          | 1 | 0 | 0 | 0 |
| <i>Micrurus_fulvius</i>            | 1 | 0 | 0 | 0 |
| <i>Micrurus_hemprichii</i>         | 1 | 0 | 0 | 0 |
| <i>Micrurus_ibiboboca</i>          | 1 | 0 | 0 | 0 |
| <i>Micrurus_lemniscatus</i>        | 1 | 0 | 0 | 0 |

|                                    |   |   |   |   |
|------------------------------------|---|---|---|---|
| <i>Micrurus_mipartitus</i>         | 1 | 0 | 0 | 0 |
| <i>Micrurus_psyches</i>            | 1 | 0 | 0 | 0 |
| <i>Micrurus_pyrrhocryptus</i>      | 1 | 0 | 0 | 0 |
| <i>Micrurus_spixii</i>             | 1 | 0 | 0 | 0 |
| <i>Micrurus_surinamensis</i>       | 1 | 0 | 0 | 0 |
| <i>Mimophis_mahfalensis</i>        | 1 | 0 | 0 | 0 |
| <i>Mitophis_asbolepis</i>          | - | 0 | 0 | 0 |
| <i>Mitophis_leptepileptus</i>      | - | 0 | 0 | 0 |
| <i>Mitophis_pyrites</i>            | - | 0 | 0 | 0 |
| <i>Mitophis_sp._A_SBH-2010</i>     | - | 0 | 0 | 0 |
| <i>Mochlus_brevicaudis</i>         | - | 0 | 0 | 0 |
| <i>Mochlus_sundevalli</i>          | 1 | 0 | 0 | 0 |
| <i>Mokopirakau_granulatus</i>      | - | 0 | 0 | 0 |
| <i>Moloch_horridus</i>             | 1 | 0 | 0 | 0 |
| <i>Monopeltis_capensis</i>         | 0 | 0 | 0 | 0 |
| <i>Montivipera_albizona</i>        | - | 0 | 0 | 0 |
| <i>Montivipera_bornmuelleri</i>    | - | 0 | 0 | 0 |
| <i>Montivipera_latifii</i>         | - | 0 | 0 | 0 |
| <i>Montivipera_raddei</i>          | - | 0 | 0 | 0 |
| <i>Montivipera_wagneri</i>         | - | 0 | 0 | 0 |
| <i>Montivipera_xanthina</i>        | - | 0 | 0 | 0 |
| <i>Morelia_amethystina</i>         | 1 | 0 | 0 | 0 |
| <i>Morelia_boeleni</i>             | 1 | 0 | 0 | 0 |
| <i>Morelia_bredli</i>              | 1 | 0 | 0 | 0 |
| <i>Morelia_carinata</i>            | 1 | 0 | 0 | 0 |
| <i>Morelia_oenpelliensis</i>       | 1 | 0 | 0 | 0 |
| <i>Morelia_spilota</i>             | 1 | 0 | 0 | 0 |
| <i>Morelia_viridis</i>             | 1 | 0 | 0 | 0 |
| <i>Morethia_adelaidensis</i>       | 1 | 0 | 0 | 0 |
| <i>Morethia_butleri</i>            | 1 | 0 | 0 | 0 |
| <i>Morethia_ruficauda</i>          | 1 | 0 | 0 | 0 |
| <i>Morunasaurus_annularis</i>      | 1 | 0 | 0 | 0 |
| <i>Myriopholis_adleri</i>          | - | 0 | 0 | 0 |
| <i>Myriopholis_algeriensis</i>     | - | 0 | 0 | 0 |
| <i>Myriopholis_blanfordi</i>       | - | 0 | 0 | 0 |
| <i>Myriopholis_boueti</i>          | - | 0 | 0 | 0 |
| <i>Myriopholis_cf._rouxestevae</i> | - | 0 | 0 | 0 |
| <i>Myriopholis_longicauda</i>      | - | 0 | 0 | 0 |
| <i>Myriopholis_macrorhynchus</i>   | - | 0 | 0 | 0 |
| <i>Myriopholis_rouxestevae</i>     | - | 0 | 0 | 0 |
| <i>Myron_richardsonii</i>          | 0 | 0 | 0 | 0 |
| <i>Nactus_acutus</i>               | 1 | 1 | 0 | 0 |
| <i>Nactus_cheverti</i>             | 1 | 1 | 0 | 0 |
| <i>Nactus_eboracensis</i>          | 1 | 1 | 0 | 0 |

|                                 |   |   |   |   |
|---------------------------------|---|---|---|---|
| <i>Nactus_galgajuga</i>         | 1 | 1 | 0 | 0 |
| <i>Nactus_multicarinatus</i>    | 1 | 1 | 0 | 0 |
| <i>Nactus_pelagicus</i>         | 1 | 1 | 0 | 0 |
| <i>Nactus_yankampeni</i>        | 1 | 1 | 0 | 0 |
| <i>Nadzikambia_mlanjensis</i>   | - | 0 | 0 | 0 |
| <i>Naja_annulifera</i>          | 1 | 0 | 0 | 0 |
| <i>Naja_arabica</i>             | - | 0 | 0 | 0 |
| <i>Naja_ashei</i>               | 1 | 0 | 0 | 0 |
| <i>Naja atra</i>                | 1 | 0 | 0 | 0 |
| <i>Naja_cf._nigricollis</i>     | - | 0 | 0 | 0 |
| <i>Naja_haje</i>                | 1 | 0 | 0 | 0 |
| <i>Naja_kaouthia</i>            | 1 | 0 | 0 | 0 |
| <i>Naja_katiensis</i>           | 1 | 0 | 0 | 0 |
| <i>Naja_mandalayensis</i>       | 1 | 0 | 0 | 0 |
| <i>Naja_melanoleuca</i>         | 1 | 0 | 0 | 0 |
| <i>Naja_mossambica</i>          | 1 | 0 | 0 | 0 |
| <i>Naja_naja</i>                | 1 | 0 | 0 | 0 |
| <i>Naja_nigricincta</i>         | 1 | 0 | 0 | 0 |
| <i>Naja_nigricollis</i>         | 1 | 0 | 0 | 0 |
| <i>Naja_nivea</i>               | 1 | 0 | 0 | 0 |
| <i>Naja_nubiae</i>              | 1 | 0 | 0 | 0 |
| <i>Naja_pallida</i>             | 1 | 0 | 0 | 0 |
| <i>Naja_siamensis</i>           | 1 | 0 | 0 | 0 |
| <i>Naja_sputatrix</i>           | 1 | 0 | 0 | 0 |
| <i>Naja_sumatrana</i>           | 1 | 0 | 0 | 0 |
| <i>Namazonurus_campbelli</i>    | - | 0 | 0 | 0 |
| <i>Namazonurus_lawrenci</i>     | - | 0 | 0 | 0 |
| <i>Namazonurus_namaquensis</i>  | - | 0 | 0 | 0 |
| <i>Namazonurus_peersi</i>       | - | 0 | 0 | 0 |
| <i>Namazonurus_pustulatus</i>   | - | 0 | 0 | 0 |
| <i>Namibiana_occidentalis</i>   | - | 0 | 0 | 0 |
| <i>Nangura_spinosa</i>          | 0 | 0 | 0 | 0 |
| <i>Nannoscincus_garrulus</i>    | - | 0 | 0 | 0 |
| <i>Nannoscincus_gracilis</i>    | - | 0 | 0 | 0 |
| <i>Nannoscincus_greeri</i>      | - | 0 | 0 | 0 |
| <i>Nannoscincus_hanchisteus</i> | - | 0 | 0 | 0 |
| <i>Nannoscincus_humectus</i>    | - | 0 | 0 | 0 |
| <i>Nannoscincus_mariei</i>      | - | 0 | 0 | 0 |
| <i>Nannoscincus_slevini</i>     | - | 0 | 0 | 0 |
| <i>Narudasia_festiva</i>        | 1 | 1 | 0 | 0 |
| <i>Natriciteres_olivacea</i>    | 1 | 0 | 0 | 0 |
| <i>Natrix_maura</i>             | 1 | 0 | 0 | 0 |
| <i>Natrix_natrix</i>            | 1 | 0 | 0 | 0 |
| <i>Natrix_tessellata</i>        | 1 | 0 | 0 | 0 |

|                                  |   |   |   |   |
|----------------------------------|---|---|---|---|
| <i>Nautilinus_elegans</i>        | 0 | 0 | 0 | 0 |
| <i>Nautilinus_gemmeus</i>        | 0 | 0 | 0 | 0 |
| <i>Nautilinus_grayii</i>         | 0 | 0 | 0 | 0 |
| <i>Nautilinus_manukanus</i>      | 0 | 0 | 0 | 0 |
| <i>Nautilinus_poecilochlorus</i> | 0 | 0 | 0 | 0 |
| <i>Nautilinus_rudis</i>          | 0 | 0 | 0 | 0 |
| <i>Nautilinus_stellatus</i>      | 0 | 0 | 0 | 0 |
| <i>Nautilinus_tuberculatus</i>   | 0 | 0 | 0 | 0 |
| <i>Nephrurus_amyae</i>           | 1 | 0 | 0 | 0 |
| <i>Nephrurus_asper</i>           | 1 | 0 | 0 | 0 |
| <i>Nephrurus_deleani</i>         | 1 | 0 | 0 | 0 |
| <i>Nephrurus_laevissimus</i>     | 1 | 0 | 0 | 0 |
| <i>Nephrurus_levis</i>           | 1 | 0 | 0 | 0 |
| <i>Nephrurus_sheai</i>           | 1 | 0 | 0 | 0 |
| <i>Nephrurus_stellatus</i>       | 1 | 0 | 0 | 0 |
| <i>Nephrurus_vertebralis</i>     | 1 | 0 | 0 | 0 |
| <i>Nephrurus_wheeleri</i>        | 1 | 0 | 0 | 0 |
| <i>Nerodia_cyclopion</i>         | 0 | 0 | 0 | 0 |
| <i>Nerodia_erythrogaster</i>     | 0 | 0 | 0 | 0 |
| <i>Nerodia_fasciata</i>          | 0 | 0 | 0 | 0 |
| <i>Nerodia_floridana</i>         | 0 | 0 | 0 | 0 |
| <i>Nerodia_harteri</i>           | 0 | 0 | 0 | 0 |
| <i>Nerodia_rhombifer</i>         | 0 | 0 | 0 | 0 |
| <i>Nerodia_sipidon</i>           | 0 | 0 | 0 | 0 |
| <i>Nerodia_taxispilota</i>       | 0 | 0 | 0 | 0 |
| <i>Neusticurus_bicarinatus</i>   | 1 | 0 | 0 | 0 |
| <i>Neusticurus_eupleopus</i>     | - | 0 | 0 | 0 |
| <i>Neusticurus_juruazensis</i>   | - | 0 | 0 | 0 |
| <i>Neusticurus_rudis</i>         | 1 | 0 | 0 | 0 |
| <i>Ninia_atrata</i>              | 1 | 0 | 0 | 0 |
| <i>Ninurta_coeruleopunctatus</i> | - | 0 | 0 | 0 |
| <i>Niveoscincus_greeni</i>       | 0 | 0 | 0 | 0 |
| <i>Niveoscincus_metallicus</i>   | 0 | 0 | 0 | 0 |
| <i>Niveoscincus_ocellatus</i>    | 0 | 0 | 0 | 0 |
| <i>Niveoscincus_pretiosus</i>    | 0 | 0 | 0 | 0 |
| <i>Norops_altae</i>              | - | 0 | 0 | 0 |
| <i>Norops_annectens</i>          | - | 0 | 0 | 0 |
| <i>Norops_aquaticus</i>          | - | 0 | 0 | 0 |
| <i>Norops_auratus</i>            | - | 0 | 0 | 0 |
| <i>Norops_bicaorum</i>           | - | 0 | 0 | 0 |
| <i>Norops_bitectus</i>           | - | 0 | 0 | 0 |
| <i>Norops_capito</i>             | - | 0 | 0 | 0 |
| <i>Norops_confusus</i>           | - | 0 | 0 | 0 |
| <i>Norops_crassulus</i>          | - | 0 | 0 | 0 |

|                                |   |   |   |   |
|--------------------------------|---|---|---|---|
| <i>Norops_cupreus</i>          | - | 0 | 0 | 0 |
| <i>Norops_guafe</i>            | - | 0 | 0 | 0 |
| <i>Norops_guazuma</i>          | - | 0 | 0 | 0 |
| <i>Norops_humilis</i>          | - | 0 | 0 | 0 |
| <i>Norops_intermedius</i>      | - | 0 | 0 | 0 |
| <i>Norops_isthmicus</i>        | - | 0 | 0 | 0 |
| <i>Norops_laeviventris</i>     | - | 0 | 0 | 0 |
| <i>Norops_lionotus</i>         | - | 0 | 0 | 0 |
| <i>Norops_loveridgei</i>       | - | 0 | 0 | 0 |
| <i>Norops_ocelloscapularis</i> | - | 0 | 0 | 0 |
| <i>Norops_onca</i>             | - | 0 | 0 | 0 |
| <i>Norops_pachypus</i>         | - | 0 | 0 | 0 |
| <i>Norops_poecilopus</i>       | - | 0 | 0 | 0 |
| <i>Norops_polyrhachis</i>      | - | 0 | 0 | 0 |
| <i>Norops_purpurgularis</i>    | - | 0 | 0 | 0 |
| <i>Norops_quercorum</i>        | - | 0 | 0 | 0 |
| <i>Norops_rubribarbus</i>      | - | 0 | 0 | 0 |
| <i>Norops_sericeus</i>         | - | 0 | 0 | 0 |
| <i>Norops_sminthus</i>         | - | 0 | 0 | 0 |
| <i>Norops_tropidogaster</i>    | - | 0 | 0 | 0 |
| <i>Norops_tropidonotus</i>     | - | 0 | 0 | 0 |
| <i>Norops_uniformis</i>        | - | 0 | 0 | 0 |
| <i>Norops_utilensis</i>        | - | 0 | 0 | 0 |
| <i>Norops_zeus</i>             | - | 0 | 0 | 0 |
| <i>Notechis_scutatus</i>       | 0 | 0 | 0 | 0 |
| <i>Nothobachia_ablephara</i>   | 1 | 0 | 0 | 0 |
| <i>Nothopsis_rugosus</i>       | 1 | 0 | 0 | 0 |
| <i>Notomabuya_frenata</i>      | - | 0 | 0 | 0 |
| <i>Notoscincus_ornatus</i>     | 1 | 0 | 0 | 0 |
| <i>Nucras_lalandii</i>         | 1 | 0 | 0 | 0 |
| <i>Nucras_tessellata</i>       | 1 | 0 | 0 | 0 |
| <i>Oedodera_marmorata</i>      | 1 | 0 | 0 | 0 |
| <i>Oedura_castelnaui</i>       | 1 | 0 | 0 | 0 |
| <i>Oedura_coggeri</i>          | 1 | 0 | 0 | 0 |
| <i>Oedura_filicipoda</i>       | 1 | 0 | 0 | 0 |
| <i>Oedura_gemmata</i>          | 1 | 0 | 0 | 0 |
| <i>Oedura_gracilis</i>         | 1 | 0 | 0 | 0 |
| <i>Oedura_lesueurii</i>        | 1 | 0 | 0 | 0 |
| <i>Oedura_marmorata</i>        | 1 | 0 | 0 | 0 |
| <i>Oedura_monilis</i>          | 1 | 0 | 0 | 0 |
| <i>Oedura_obscura</i>          | 1 | 0 | 0 | 0 |
| <i>Oedura_reticulata</i>       | 1 | 0 | 0 | 0 |
| <i>Oedura_rhombifer</i>        | 1 | 0 | 0 | 0 |
| <i>Oedura_robusta</i>          | 1 | 0 | 0 | 0 |

|                                 |   |   |   |   |
|---------------------------------|---|---|---|---|
| <i>Oedura_tryoni</i>            | 1 | 0 | 0 | 0 |
| <i>Oligodon_arnensis</i>        | 1 | 0 | 0 | 0 |
| <i>Oligodon_barroni</i>         | 1 | 0 | 0 | 0 |
| <i>Oligodon_chinensis</i>       | 1 | 0 | 0 | 0 |
| <i>Oligodon_cinereus</i>        | 1 | 0 | 0 | 0 |
| <i>Oligodon_cruentatus</i>      | 1 | 0 | 0 | 0 |
| <i>Oligodon_cyclurus</i>        | 1 | 0 | 0 | 0 |
| <i>Oligodon_formosanus</i>      | 1 | 0 | 0 | 0 |
| <i>Oligodon_maculatus</i>       | 1 | 0 | 0 | 0 |
| <i>Oligodon_ocellatus</i>       | 1 | 0 | 0 | 0 |
| <i>Oligodon_octolineatus</i>    | 1 | 0 | 0 | 0 |
| <i>Oligodon_planiceps</i>       | 1 | 0 | 0 | 0 |
| <i>Oligodon_splendidus</i>      | 1 | 0 | 0 | 0 |
| <i>Oligodon_sublineatus</i>     | 1 | 0 | 0 | 0 |
| <i>Oligodon_taeiniatus</i>      | 1 | 0 | 0 | 0 |
| <i>Oligodon_taeiniolatus</i>    | 1 | 0 | 0 | 0 |
| <i>Oligodon_theobaldi</i>       | 1 | 0 | 0 | 0 |
| <i>Oligodon_torquatus</i>       | 1 | 0 | 0 | 0 |
| <i>Oligosoma_acrinasum</i>      | 0 | 0 | 0 | 0 |
| <i>Oligosoma_aeneum</i>         | - | 0 | 0 | 0 |
| <i>Oligosoma_alani</i>          | - | 0 | 0 | 0 |
| <i>Oligosoma_chloronoton</i>    | 0 | 0 | 0 | 0 |
| <i>Oligosoma_fallai</i>         | 0 | 0 | 0 | 0 |
| <i>Oligosoma_grande</i>         | 0 | 0 | 0 | 0 |
| <i>Oligosoma_hardyi</i>         | - | 0 | 0 | 0 |
| <i>Oligosoma_homalonotum</i>    | 0 | 0 | 0 | 0 |
| <i>Oligosoma_inconspicuum</i>   | 0 | 0 | 0 | 0 |
| <i>Oligosoma_infrapunctatum</i> | 0 | 0 | 0 | 0 |
| <i>Oligosoma_levidensum</i>     | - | 0 | 0 | 0 |
| <i>Oligosoma_lichenigera</i>    | - | 0 | 0 | 0 |
| <i>Oligosoma_lineoocellatum</i> | 0 | 0 | 0 | 0 |
| <i>Oligosoma_longipes</i>       | 0 | 0 | 0 | 0 |
| <i>Oligosoma_maccanni</i>       | 0 | 0 | 0 | 0 |
| <i>Oligosoma_macgregori</i>     | - | 0 | 0 | 0 |
| <i>Oligosoma_microlepis</i>     | 0 | 0 | 0 | 0 |
| <i>Oligosoma_moco</i>           | 0 | 0 | 0 | 0 |
| <i>Oligosoma_nigriplantare</i>  | 0 | 0 | 0 | 0 |
| <i>Oligosoma_notosaurus</i>     | 0 | 0 | 0 | 0 |
| <i>Oligosoma_oliveri</i>        | - | 0 | 0 | 0 |
| <i>Oligosoma_ornatum</i>        | - | 0 | 0 | 0 |
| <i>Oligosoma_otagense</i>       | 0 | 0 | 0 | 0 |
| <i>Oligosoma_pikitanga</i>      | 0 | 0 | 0 | 0 |
| <i>Oligosoma_smithi</i>         | 0 | 0 | 0 | 0 |
| <i>Oligosoma_stenotis</i>       | 0 | 0 | 0 | 0 |

|                                   |   |   |   |   |
|-----------------------------------|---|---|---|---|
| <i>Oligosoma_striatum</i>         | 0 | 0 | 0 | 0 |
| <i>Oligosoma_suteri</i>           | 1 | 0 | 0 | 0 |
| <i>Oligosoma_taumakae</i>         | 0 | 0 | 0 | 0 |
| <i>Oligosoma_townsi</i>           | - | 0 | 0 | 0 |
| <i>Oligosoma_waimatense</i>       | 0 | 0 | 0 | 0 |
| <i>Oligosoma_whitakeri</i>        | - | 0 | 0 | 0 |
| <i>Oligosoma_zelandicum</i>       | 0 | 0 | 0 | 0 |
| <i>Omanosaura_cyanura</i>         | 1 | 0 | 0 | 0 |
| <i>Omanosaura_jayakari</i>        | 1 | 0 | 0 | 0 |
| <i>Oocatochus_rufodorsatus</i>    | - | 0 | 0 | 0 |
| <i>Opheodrys_aestivus</i>         | 1 | 0 | 0 | 0 |
| <i>Opheodrys_venalis</i>          | 1 | 0 | 0 | 0 |
| <i>Ophidiocephalus_taeniatus</i>  | 1 | 0 | 0 | 0 |
| <i>Ophiodes_striatus</i>          | 0 | 0 | 0 | 0 |
| <i>Ophiomorus_latastii</i>        | 0 | 0 | 0 | 0 |
| <i>Ophiomorus_punctatissimus</i>  | 0 | 0 | 0 | 0 |
| <i>Ophiophagus_hannah</i>         | 1 | 0 | 0 | 0 |
| <i>Ophioscincus_ophioscincus</i>  | 1 | 0 | 0 | 0 |
| <i>Ophioscincus_truncatus</i>     | 1 | 0 | 0 | 0 |
| <i>Ophisaurus_attenuatus</i>      | 1 | 0 | 0 | 0 |
| <i>Ophisaurus_gracilis</i>        | 1 | 0 | 0 | 0 |
| <i>Ophisaurus_harti</i>           | 1 | 0 | 0 | 0 |
| <i>Ophisaurus_koellikeri</i>      | 1 | 0 | 0 | 0 |
| <i>Ophisaurus_ventralis</i>       | 1 | 0 | 0 | 0 |
| <i>Ophisops_elegans</i>           | 1 | 0 | 0 | 0 |
| <i>Ophisops_occidentalis</i>      | 1 | 0 | 0 | 0 |
| <i>Ophryacus_melanurus</i>        | 0 | 0 | 0 | 0 |
| <i>Ophryacus_undulatus</i>        | 0 | 0 | 0 | 0 |
| <i>Opisthotropis_cheni</i>        | 1 | 0 | 0 | 0 |
| <i>Opisthotropis_guangxiensis</i> | 1 | 0 | 0 | 0 |
| <i>Opisthotropis_lateralis</i>    | 1 | 0 | 0 | 0 |
| <i>Opisthotropis_latouchii</i>    | 1 | 0 | 0 | 0 |
| <i>Oplurus_cuvieri</i>            | 1 | 0 | 0 | 0 |
| <i>Oplurus_cyclurus</i>           | 1 | 0 | 0 | 0 |
| <i>Oplurus_fierinensis</i>        | 1 | 0 | 0 | 0 |
| <i>Oplurus_grandidieri</i>        | 1 | 0 | 0 | 0 |
| <i>Oplurus_quadrimaculatus</i>    | 1 | 0 | 0 | 0 |
| <i>Oplurus_saxicola</i>           | 1 | 0 | 0 | 0 |
| <i>Oreophis_porphyraceus</i>      | - | 0 | 0 | 0 |
| <i>Orraya_occultus</i>            | 1 | 0 | 0 | 0 |
| <i>Orthriophis_cantoris</i>       | 1 | 0 | 0 | 0 |
| <i>Orthriophis_hodgsonii</i>      | - | 0 | 0 | 0 |
| <i>Orthriophis_moellendorffi</i>  | 1 | 0 | 0 | 0 |
| <i>Orthriophis_taeniurus</i>      | 1 | 0 | 0 | 0 |

|                                    |   |   |   |   |
|------------------------------------|---|---|---|---|
| <i>Otocryptis_wiegmanni</i>        | 1 | 0 | 0 | 0 |
| <i>Ouroborus_cataphractus</i>      | - | 0 | 0 | 0 |
| <i>Ovophis_monticola</i>           | 1 | 0 | 0 | 0 |
| <i>Ovophis_okinavensis</i>         | 0 | 0 | 0 | 0 |
| <i>Ovophis_tonkinensis</i>         | 1 | 0 | 0 | 0 |
| <i>Ovophis_zayuensis</i>           | 1 | 0 | 0 | 0 |
| <i>Oxybelis_aeneus</i>             | 1 | 0 | 0 | 0 |
| <i>Oxybelis_fulgidus</i>           | 1 | 0 | 0 | 0 |
| <i>Oxyrhabdium_leporinum</i>       | 1 | 0 | 0 | 0 |
| <i>Oxyrhopus_clathratus</i>        | 1 | 0 | 0 | 0 |
| <i>Oxyrhopus_formosus</i>          | 1 | 0 | 0 | 0 |
| <i>Oxyrhopus_guibeii</i>           | 1 | 0 | 0 | 0 |
| <i>Oxyrhopus_melanogenys</i>       | 1 | 0 | 0 | 0 |
| <i>Oxyrhopus_petola</i>            | 1 | 0 | 0 | 0 |
| <i>Oxyrhopus_rhombifer</i>         | 1 | 0 | 0 | 0 |
| <i>Oxyuranus_microlepidotus</i>    | 1 | 0 | 0 | 0 |
| <i>Oxyuranus_scutellatus</i>       | 1 | 0 | 0 | 0 |
| <i>Pachydactylus_affinis</i>       | 1 | 1 | 0 | 0 |
| <i>Pachydactylus_austeni</i>       | 1 | 1 | 0 | 0 |
| <i>Pachydactylus_barnardi</i>      | 1 | 1 | 0 | 0 |
| <i>Pachydactylus_bicolor</i>       | 1 | 1 | 0 | 0 |
| <i>Pachydactylus_capensis</i>      | 1 | 1 | 0 | 0 |
| <i>Pachydactylus_caraculicus</i>   | 1 | 1 | 0 | 0 |
| <i>Pachydactylus_carinatus</i>     | 1 | 1 | 0 | 0 |
| <i>Pachydactylus_fasciatus</i>     | 1 | 1 | 0 | 0 |
| <i>Pachydactylus_formosus</i>      | 1 | 1 | 0 | 0 |
| <i>Pachydactylus_gaiasensis</i>    | 1 | 1 | 0 | 0 |
| <i>Pachydactylus_geitje</i>        | 1 | 1 | 0 | 0 |
| <i>Pachydactylus_griffini</i>      | 1 | 1 | 0 | 0 |
| <i>Pachydactylus_haackei</i>       | 1 | 1 | 0 | 0 |
| <i>Pachydactylus_kladaroderma</i>  | 1 | 1 | 0 | 0 |
| <i>Pachydactylus_labialis</i>      | 1 | 1 | 0 | 0 |
| <i>Pachydactylus_laevigatus</i>    | 1 | 1 | 0 | 0 |
| <i>Pachydactylus_maculatus</i>     | 1 | 1 | 0 | 0 |
| <i>Pachydactylus_mariquensis</i>   | 1 | 1 | 0 | 0 |
| <i>Pachydactylus_melachlani</i>    | 1 | 1 | 0 | 0 |
| <i>Pachydactylus_monicae</i>       | 1 | 1 | 0 | 0 |
| <i>Pachydactylus_montanus</i>      | 1 | 1 | 0 | 0 |
| <i>Pachydactylus_namaquensis</i>   | 1 | 1 | 0 | 0 |
| <i>Pachydactylus_oculatus</i>      | 1 | 1 | 0 | 0 |
| <i>Pachydactylus_oreophilus</i>    | 1 | 1 | 0 | 0 |
| <i>Pachydactylus_oshaughnessyi</i> | 1 | 1 | 0 | 0 |
| <i>Pachydactylus_parascutatus</i>  | 1 | 1 | 0 | 0 |
| <i>Pachydactylus_punctatus</i>     | 1 | 1 | 0 | 0 |



|                                     |   |   |   |   |
|-------------------------------------|---|---|---|---|
| <i>Pachydactylus_purcelli</i>       | 1 | 1 | 0 | 0 |
| <i>Pachydactylus_rangei</i>         | 1 | 1 | 0 | 0 |
| <i>Pachydactylus_reconditus</i>     | 1 | 1 | 0 | 0 |
| <i>Pachydactylus_robertsi</i>       | 1 | 1 | 0 | 0 |
| <i>Pachydactylus_rugosus</i>        | 1 | 1 | 0 | 0 |
| <i>Pachydactylus_sansteynae</i>     | 1 | 1 | 0 | 0 |
| <i>Pachydactylus_scherzi</i>        | 1 | 1 | 0 | 0 |
| <i>Pachydactylus_scutatus</i>       | 1 | 1 | 0 | 0 |
| <i>Pachydactylus_serval</i>         | 1 | 1 | 0 | 0 |
| <i>Pachydactylus_tigrinus</i>       | 1 | 1 | 0 | 0 |
| <i>Pachydactylus_tsodiloensis</i>   | 1 | 1 | 0 | 0 |
| <i>Pachydactylus_vansoni</i>        | 1 | 1 | 0 | 0 |
| <i>Pachydactylus_vanzyl</i>         | 1 | 1 | 0 | 0 |
| <i>Pachydactylus_waterbergensis</i> | 1 | 1 | 0 | 0 |
| <i>Pachydactylus_weberi</i>         | 1 | 1 | 0 | 0 |
| <i>Pamelaescincus_gardinieri</i>    | - | 0 | 0 | 0 |
| <i>Panaspis_breviceps</i>           | 1 | 0 | 0 | 0 |
| <i>Panaspis_togoensis</i>           | 1 | 0 | 0 | 0 |
| <i>Panopa_carvalhoi</i>             | - | 0 | 0 | 0 |
| <i>Panopa_croizati</i>              | - | 0 | 0 | 0 |
| <i>Pantherophis_allegghaniensis</i> | 1 | 0 | 0 | 0 |
| <i>Pantherophis_bairdi</i>          | 1 | 0 | 0 | 0 |
| <i>Pantherophis_emoryi</i>          | 1 | 0 | 0 | 0 |
| <i>Pantherophis_gloydi</i>          | 1 | 0 | 0 | 0 |
| <i>Pantherophis_guttatus</i>        | 1 | 0 | 0 | 0 |
| <i>Pantherophis_obsoletus</i>       | 1 | 0 | 0 | 0 |
| <i>Pantherophis_slowinskii</i>      | 1 | 0 | 0 | 0 |
| <i>Pantherophis_spiloides</i>       | 1 | 0 | 0 | 0 |
| <i>Pantherophis_vulpinus</i>        | 1 | 0 | 0 | 0 |
| <i>Pantodactylus_quadrilineatus</i> | - | 0 | 0 | 0 |
| <i>Pantodactylus_schreibersii</i>   | - | 0 | 0 | 0 |
| <i>Papuascincus_stanleyanus</i>     | 1 | 0 | 0 | 0 |
| <i>Paracontias_brocchii</i>         | - | 0 | 0 | 0 |
| <i>Paracontias_hildebrandti</i>     | - | 0 | 0 | 0 |
| <i>Paracontias_holomelas</i>        | - | 0 | 0 | 0 |
| <i>Paracontias_manify</i>           | - | 0 | 0 | 0 |
| <i>Paracontias_rothschildi</i>      | - | 0 | 0 | 0 |
| <i>Paradelma_orientalis</i>         | 1 | 0 | 0 | 0 |
| <i>Paragehyra_gabriellae</i>        | 1 | 1 | 0 | 0 |
| <i>Parahydrophis_mertoni</i>        | 0 | 0 | 0 | 0 |
| <i>Paranaja_multifasciata</i>       | - | 0 | 0 | 0 |
| <i>Parastenophis_betsileanus</i>    | - | 0 | 0 | 0 |
| <i>Pareas_boulengeri</i>            | 1 | 0 | 0 | 0 |
| <i>Pareas_carinatus</i>             | 1 | 0 | 0 | 0 |

|                                 |   |   |   |   |
|---------------------------------|---|---|---|---|
| <i>Pareas_formosensis</i>       | 1 | 0 | 0 | 0 |
| <i>Pareas_hamptoni</i>          | 1 | 0 | 0 | 0 |
| <i>Pareas_macularius</i>        | 1 | 0 | 0 | 0 |
| <i>Pareas_margaritophorus</i>   | 1 | 0 | 0 | 0 |
| <i>Pareas_monticola</i>         | 1 | 0 | 0 | 0 |
| <i>Pareas_nuchalis</i>          | 1 | 0 | 0 | 0 |
| <i>Pareas_vertebralis</i>       | - | 0 | 0 | 0 |
| <i>Parias_hageni</i>            | 1 | 0 | 0 | 0 |
| <i>Parias_malcolmi</i>          | 1 | 0 | 0 | 0 |
| <i>Parias_schultzei</i>         | 1 | 0 | 0 | 0 |
| <i>Parias_sumatranus</i>        | 1 | 0 | 0 | 0 |
| <i>Paroedura_androyensis</i>    | 1 | 1 | 0 | 0 |
| <i>Paroedura_bastardi</i>       | 1 | 1 | 0 | 0 |
| <i>Paroedura_gracilis</i>       | 1 | 1 | 0 | 0 |
| <i>Paroedura_homalorhina</i>    | 1 | 1 | 0 | 0 |
| <i>Paroedura_karstophila</i>    | 1 | 1 | 0 | 0 |
| <i>Paroedura_lohatsara</i>      | 1 | 1 | 0 | 0 |
| <i>Paroedura_masobe</i>         | 1 | 1 | 0 | 0 |
| <i>Paroedura_oviceps</i>        | 1 | 1 | 0 | 0 |
| <i>Paroedura_picta</i>          | 1 | 1 | 0 | 0 |
| <i>Paroedura_sanctijohannis</i> | 1 | 1 | 0 | 0 |
| <i>Paroedura_stumpffi</i>       | 1 | 1 | 0 | 0 |
| <i>Paroedura_tanjaka</i>        | 1 | 1 | 0 | 0 |
| <i>Paroedura_vazimba</i>        | 1 | 1 | 0 | 0 |
| <i>Parvilacerta_fraasii</i>     | 1 | 0 | 0 | 0 |
| <i>Parvilacerta_parva</i>       | 1 | 0 | 0 | 0 |
| <i>Parvoscincus_sisoni</i>      | - | 0 | 0 | 0 |
| <i>Pedioplanis_breviceps</i>    | 1 | 0 | 0 | 0 |
| <i>Pedioplanis_burchelli</i>    | 1 | 0 | 0 | 0 |
| <i>Pedioplanis_gaerdesi</i>     | 1 | 0 | 0 | 0 |
| <i>Pedioplanis_husabensis</i>   | 1 | 0 | 0 | 0 |
| <i>Pedioplanis_inornata</i>     | 1 | 0 | 0 | 0 |
| <i>Pedioplanis_laticeps</i>     | 1 | 0 | 0 | 0 |
| <i>Pedioplanis_lineocellata</i> | 1 | 0 | 0 | 0 |
| <i>Pedioplanis_namaquensis</i>  | 1 | 0 | 0 | 0 |
| <i>Pedioplanis_rubens</i>       | 1 | 0 | 0 | 0 |
| <i>Pedioplanis_undata</i>       | 1 | 0 | 0 | 0 |
| <i>Pelamis_platura</i>          | 0 | 0 | 0 | 0 |
| <i>Perochirus_ateles</i>        | 1 | 1 | 0 | 0 |
| <i>Petrosaurus_mearnsi</i>      | 1 | 0 | 0 | 0 |
| <i>Petrosaurus_repens</i>       | 1 | 0 | 0 | 0 |
| <i>Petrosaurus_thalassinus</i>  | 1 | 0 | 0 | 0 |
| <i>Phalotris_lemniscatus</i>    | 1 | 0 | 0 | 0 |
| <i>Phalotris_nasutus</i>        | 1 | 0 | 0 | 0 |

|                                  |   |   |   |   |
|----------------------------------|---|---|---|---|
| <i>Phelsuma_abbotti</i>          | 1 | 1 | 0 | 0 |
| <i>Phelsuma_andamanense</i>      | 1 | 1 | 0 | 0 |
| <i>Phelsuma_antanosy</i>         | 1 | 1 | 0 | 0 |
| <i>Phelsuma_astriata</i>         | 1 | 1 | 0 | 0 |
| <i>Phelsuma_barbouri</i>         | 1 | 1 | 0 | 0 |
| <i>Phelsuma_berghofi</i>         | 1 | 1 | 0 | 0 |
| <i>Phelsuma_borbonica</i>        | 1 | 1 | 0 | 0 |
| <i>Phelsuma_breviceps</i>        | 1 | 1 | 0 | 0 |
| <i>Phelsuma_cepediana</i>        | 1 | 1 | 0 | 0 |
| <i>Phelsuma_comorensis</i>       | 1 | 1 | 0 | 0 |
| <i>Phelsuma_dubia</i>            | 1 | 1 | 0 | 0 |
| <i>Phelsuma_edwardnewtoni</i>    | 1 | 1 | 0 | 0 |
| <i>Phelsuma_flavigularis</i>     | 1 | 1 | 0 | 0 |
| <i>Phelsuma_gigas</i>            | 1 | 1 | 0 | 0 |
| <i>Phelsuma_grandis</i>          | - | 1 | 0 | 0 |
| <i>Phelsuma_guentheri</i>        | 1 | 1 | 0 | 0 |
| <i>Phelsuma_guimbeaui</i>        | 1 | 1 | 0 | 0 |
| <i>Phelsuma_guttata</i>          | 1 | 1 | 0 | 0 |
| <i>Phelsuma_hielscheri</i>       | 1 | 1 | 0 | 0 |
| <i>Phelsuma_inexpectata</i>      | 1 | 1 | 0 | 0 |
| <i>Phelsuma_kely</i>             | 1 | 1 | 0 | 0 |
| <i>Phelsuma_klemmeri</i>         | 1 | 1 | 0 | 0 |
| <i>Phelsuma_laticauda</i>        | 1 | 1 | 0 | 0 |
| <i>Phelsuma_lineata</i>          | 1 | 1 | 0 | 0 |
| <i>Phelsuma_madagascariensis</i> | 1 | 1 | 0 | 0 |
| <i>Phelsuma_malamakibo</i>       | 1 | 1 | 0 | 0 |
| <i>Phelsuma_modesta</i>          | 1 | 1 | 0 | 0 |
| <i>Phelsuma_mutabilis</i>        | 1 | 1 | 0 | 0 |
| <i>Phelsuma_nigristriata</i>     | 1 | 1 | 0 | 0 |
| <i>Phelsuma_ornata</i>           | 1 | 1 | 0 | 0 |
| <i>Phelsuma_parkeri</i>          | 1 | 1 | 0 | 0 |
| <i>Phelsuma_pronki</i>           | 1 | 1 | 0 | 0 |
| <i>Phelsuma_pusilla</i>          | 1 | 1 | 0 | 0 |
| <i>Phelsuma_quadriocellata</i>   | 1 | 1 | 0 | 0 |
| <i>Phelsuma_ravenala</i>         | 1 | 1 | 0 | 0 |
| <i>Phelsuma_robertmertensi</i>   | 1 | 1 | 0 | 0 |
| <i>Phelsuma_seippi</i>           | 1 | 1 | 0 | 0 |
| <i>Phelsuma_serraticauda</i>     | 1 | 1 | 0 | 0 |
| <i>Phelsuma_standingi</i>        | 1 | 1 | 0 | 0 |
| <i>Phelsuma_sundbergi</i>        | 1 | 1 | 0 | 0 |
| <i>Phelsuma_v-nigra</i>          | - | 1 | 0 | 0 |
| <i>Phelsuma_vanheygeni</i>       | 1 | 1 | 0 | 0 |
| <i>Philochortus_spinalis</i>     | 1 | 0 | 0 | 0 |
| <i>Philodryas_aestiva</i>        | - | 0 | 0 | 0 |

|                                       |   |   |   |   |
|---------------------------------------|---|---|---|---|
| <i>Philodryas_baroni</i>              | 1 | 0 | 0 | 0 |
| <i>Philodryas_mattogrossensis</i>     | 1 | 0 | 0 | 0 |
| <i>Philodryas_nattereri</i>           | 1 | 0 | 0 | 0 |
| <i>Philodryas_olfersii</i>            | 1 | 0 | 0 | 0 |
| <i>Philodryas_patagoniensis</i>       | 1 | 0 | 0 | 0 |
| <i>Philodryas_psammophidea</i>        | 1 | 0 | 0 | 0 |
| <i>Philodryas_viridissima</i>         | 1 | 0 | 0 | 0 |
| <i>Philothamnus_angolensis</i>        | 1 | 0 | 0 | 0 |
| <i>Philothamnus_carinatus</i>         | 1 | 0 | 0 | 0 |
| <i>Philothamnus_girardi</i>           | 1 | 0 | 0 | 0 |
| <i>Philothamnus_heterodermus</i>      | 1 | 0 | 0 | 0 |
| <i>Philothamnus_hoplogaster</i>       | 1 | 0 | 0 | 0 |
| <i>Philothamnus_natalensis</i>        | 1 | 0 | 0 | 0 |
| <i>Philothamnus_nitidus</i>           | 1 | 0 | 0 | 0 |
| <i>Philothamnus_semivariatus</i>      | 1 | 0 | 0 | 0 |
| <i>Philothamnus_thomensis</i>         | 1 | 0 | 0 | 0 |
| <i>Phimophis_guerini</i>              | 1 | 0 | 0 | 0 |
| <i>Phimophis_iglesi</i>               | 1 | 0 | 0 | 0 |
| <i>Phoboscincus_garnieri</i>          | - | 0 | 0 | 0 |
| <i>Phoenicolacerta_cyanisparsa</i>    | 1 | 0 | 0 | 0 |
| <i>Phoenicolacerta_kulzeri</i>        | 1 | 0 | 0 | 0 |
| <i>Phoenicolacerta_laevis</i>         | 1 | 0 | 0 | 0 |
| <i>Pholidobolus_macbrydei</i>         | 1 | 0 | 0 | 0 |
| <i>Pholidobolus_montium</i>           | 1 | 0 | 0 | 0 |
| <i>Phoxophrys_nigrilabris</i>         | 1 | 0 | 0 | 0 |
| <i>Phrynocephalus_acutirostris</i>    | - | 0 | 0 | 0 |
| <i>Phrynocephalus_albolineatus</i>    | 1 | 0 | 0 | 0 |
| <i>Phrynocephalus_axillaris</i>       | 1 | 0 | 0 | 0 |
| <i>Phrynocephalus_erythrurus</i>      | - | 0 | 0 | 0 |
| <i>Phrynocephalus_forsythii</i>       | 0 | 0 | 0 | 0 |
| <i>Phrynocephalus_frontalis</i>       | - | 0 | 0 | 0 |
| <i>Phrynocephalus_grumgrzimailoi</i>  | - | 0 | 0 | 0 |
| <i>Phrynocephalus_guttatus</i>        | 1 | 0 | 0 | 0 |
| <i>Phrynocephalus_helioscopus</i>     | 1 | 0 | 0 | 0 |
| <i>Phrynocephalus_interscapularis</i> | 1 | 0 | 0 | 0 |
| <i>Phrynocephalus_melanurus</i>       | 1 | 0 | 0 | 0 |
| <i>Phrynocephalus_mystaceus</i>       | 1 | 0 | 0 | 0 |
| <i>Phrynocephalus_przewalskii</i>     | 1 | 0 | 0 | 0 |
| <i>Phrynocephalus_putjatia</i>        | - | 0 | 0 | 0 |
| <i>Phrynocephalus_raddei</i>          | 1 | 0 | 0 | 0 |
| <i>Phrynocephalus_scutellatus</i>     | 1 | 0 | 0 | 0 |
| <i>Phrynocephalus_theobaldi</i>       | 0 | 0 | 0 | 0 |
| <i>Phrynocephalus_versicolor</i>      | 1 | 0 | 0 | 0 |
| <i>Phrynocephalus_vlangalii</i>       | 0 | 0 | 0 | 0 |

|                                         |   |   |   |   |
|-----------------------------------------|---|---|---|---|
| <i>Phrynosoma_asio</i>                  | 1 | 0 | 0 | 0 |
| <i>Phrynosoma_blainvillii</i>           | 1 | 0 | 0 | 0 |
| <i>Phrynosoma_braconneri</i>            | 0 | 0 | 0 | 0 |
| <i>Phrynosoma_cerroense</i>             | 1 | 0 | 0 | 0 |
| <i>Phrynosoma_cornutum</i>              | 1 | 0 | 0 | 0 |
| <i>Phrynosoma_coronatum</i>             | 1 | 0 | 0 | 0 |
| <i>Phrynosoma_ditmarsi</i>              | 0 | 0 | 0 | 0 |
| <i>Phrynosoma_douglassii</i>            | 0 | 0 | 0 | 0 |
| <i>Phrynosoma_hernandesi</i>            | 0 | 0 | 0 | 0 |
| <i>Phrynosoma_mcallii</i>               | 1 | 0 | 0 | 0 |
| <i>Phrynosoma_modestum</i>              | 1 | 0 | 0 | 0 |
| <i>Phrynosoma_orbiculare</i>            | 0 | 0 | 0 | 0 |
| <i>Phrynosoma_platyrrhinus</i>          | 1 | 0 | 0 | 0 |
| <i>Phrynosoma_solare</i>                | 1 | 0 | 0 | 0 |
| <i>Phrynosoma_taurus</i>                | 0 | 0 | 0 | 0 |
| <i>Phrynosoma_wigginsi</i>              | 1 | 0 | 0 | 0 |
| <i>Phyllodactylus_bordai</i>            | 1 | 1 | 0 | 0 |
| <i>Phyllodactylus_bugastrolepis</i>     | 1 | 1 | 0 | 0 |
| <i>Phyllodactylus_davisi</i>            | 1 | 1 | 0 | 0 |
| <i>Phyllodactylus_delcampoi</i>         | 1 | 1 | 0 | 0 |
| <i>Phyllodactylus_duellmani</i>         | 1 | 1 | 0 | 0 |
| <i>Phyllodactylus_homolepidurus</i>     | 1 | 1 | 0 | 0 |
| <i>Phyllodactylus_lanei</i>             | 1 | 1 | 0 | 0 |
| <i>Phyllodactylus_nocticolus</i>        | 1 | 1 | 0 | 0 |
| <i>Phyllodactylus_paucituberculatus</i> | 1 | 1 | 0 | 0 |
| <i>Phyllodactylus_reissii</i>           | 1 | 1 | 0 | 0 |
| <i>Phyllodactylus_tuberculosis</i>      | 1 | 1 | 0 | 0 |
| <i>Phyllodactylus_unctus</i>            | 1 | 1 | 0 | 0 |
| <i>Phyllodactylus_wirshingi</i>         | 1 | 1 | 0 | 0 |
| <i>Phyllodactylus_xanti</i>             | 1 | 1 | 0 | 0 |
| <i>Phyllopezus_lutzae</i>               | - | 1 | 0 | 0 |
| <i>Phyllopezus_maranjonensis</i>        | 1 | 1 | 0 | 0 |
| <i>Phyllopezus_periosus</i>             | 1 | 1 | 0 | 0 |
| <i>Phyllopezus_pollicaris</i>           | 1 | 1 | 0 | 0 |
| <i>Phyllorhynchus_decurtatus</i>        | 1 | 0 | 0 | 0 |
| <i>Phyllurus_amicola</i>                | 1 | 0 | 0 | 0 |
| <i>Phyllurus_kabikabi</i>               | 1 | 0 | 0 | 0 |
| <i>Phyllurus_platurus</i>               | 1 | 0 | 0 | 0 |
| <i>Phymaturus_antofagastensis</i>       | 0 | 0 | 0 | 0 |
| <i>Phymaturus_dorsimaculatus</i>        | 0 | 0 | 0 | 0 |
| <i>Phymaturus_indistinctus</i>          | 0 | 0 | 0 | 0 |
| <i>Phymaturus_mallimaccii</i>           | 0 | 0 | 0 | 0 |
| <i>Phymaturus_palluma</i>               | 0 | 0 | 0 | 0 |
| <i>Phymaturus_patagonicus</i>           | 0 | 0 | 0 | 0 |

|                                  |   |   |   |   |
|----------------------------------|---|---|---|---|
| <i>Phymaturus_punae</i>          | 0 | 0 | 0 | 0 |
| <i>Phymaturus_somuncurensis</i>  | 0 | 0 | 0 | 0 |
| <i>Physignathus_cocincinus</i>   | 1 | 0 | 0 | 0 |
| <i>Physignathus_lesueurii</i>    | 1 | 0 | 0 | 0 |
| <i>Pinoyscincus_abdictus</i>     | - | 0 | 0 | 0 |
| <i>Pinoyscincus_coxi</i>         | - | 0 | 0 | 0 |
| <i>Pinoyscincus_jagori</i>       | - | 0 | 0 | 0 |
| <i>Pinoyscincus_llanosi</i>      | - | 0 | 0 | 0 |
| <i>Pinoyscincus_mindanensis</i>  | - | 0 | 0 | 0 |
| <i>Pituophis_catenifer</i>       | 1 | 0 | 0 | 0 |
| <i>Pituophis_deppei</i>          | 1 | 0 | 0 | 0 |
| <i>Pituophis_lineaticollis</i>   | 1 | 0 | 0 | 0 |
| <i>Pituophis_melanoleucus</i>    | 1 | 0 | 0 | 0 |
| <i>Pituophis_ruthveni</i>        | 1 | 0 | 0 | 0 |
| <i>Placosoma_cordylinum</i>      | 1 | 0 | 0 | 0 |
| <i>Placosoma_glabellum</i>       | 1 | 0 | 0 | 0 |
| <i>Plagiopholis_styani</i>       | 1 | 0 | 0 | 0 |
| <i>Platyceps_collaris</i>        | 1 | 0 | 0 | 0 |
| <i>Platyceps_florulentus</i>     | 1 | 0 | 0 | 0 |
| <i>Platyceps_karelini</i>        | 1 | 0 | 0 | 0 |
| <i>Platyceps_najadum</i>         | 1 | 0 | 0 | 0 |
| <i>Platyceps_rhodorachis</i>     | 1 | 0 | 0 | 0 |
| <i>Platyceps_rogersi</i>         | 1 | 0 | 0 | 0 |
| <i>Platyceps_rubriceps</i>       | - | 0 | 0 | 0 |
| <i>Platyceps_ventromaculatus</i> | 1 | 0 | 0 | 0 |
| <i>Platysaurus_broadleyi</i>     | 1 | 0 | 0 | 0 |
| <i>Platysaurus_capensis</i>      | 1 | 0 | 0 | 0 |
| <i>Platysaurus_intermedius</i>   | 1 | 0 | 0 | 0 |
| <i>Platysaurus_minor</i>         | 1 | 0 | 0 | 0 |
| <i>Platysaurus_mitchelli</i>     | 1 | 0 | 0 | 0 |
| <i>Platysaurus_monotropis</i>    | 1 | 0 | 0 | 0 |
| <i>Platysaurus_pungweensis</i>   | 1 | 0 | 0 | 0 |
| <i>Plestiodon_anthracinus</i>    | 1 | 0 | 0 | 0 |
| <i>Plestiodon_barbouri</i>       | - | 0 | 0 | 0 |
| <i>Plestiodon_brevirostris</i>   | 0 | 0 | 0 | 0 |
| <i>Plestiodon_callicephalus</i>  | 1 | 0 | 0 | 0 |
| <i>Plestiodon_capito</i>         | 1 | 0 | 0 | 0 |
| <i>Plestiodon_chinensis</i>      | 1 | 0 | 0 | 0 |
| <i>Plestiodon_copei</i>          | 0 | 0 | 0 | 0 |
| <i>Plestiodon_dugesii</i>        | 0 | 0 | 0 | 0 |
| <i>Plestiodon_egregius</i>       | 1 | 0 | 0 | 0 |
| <i>Plestiodon_elegans</i>        | 1 | 0 | 0 | 0 |
| <i>Plestiodon_fasciatus</i>      | 1 | 0 | 0 | 0 |
| <i>Plestiodon_gilberti</i>       | 1 | 0 | 0 | 0 |

|                                    |   |   |   |   |
|------------------------------------|---|---|---|---|
| <i>Plestiodon_inexpectatus</i>     | 1 | 0 | 0 | 0 |
| <i>Plestiodon_japonicus</i>        | - | 0 | 0 | 0 |
| <i>Plestiodon_kishinouyei</i>      | - | 0 | 0 | 0 |
| <i>Plestiodon_lagunensis</i>       | - | 0 | 0 | 0 |
| <i>Plestiodon_laticeps</i>         | 1 | 0 | 0 | 0 |
| <i>Plestiodon_laticutatus</i>      | 1 | 0 | 0 | 0 |
| <i>Plestiodon_longirostris</i>     | - | 0 | 0 | 0 |
| <i>Plestiodon_lynxe</i>            | 0 | 0 | 0 | 0 |
| <i>Plestiodon_marginatus</i>       | - | 0 | 0 | 0 |
| <i>Plestiodon_multivirgatus</i>    | 1 | 0 | 0 | 0 |
| <i>Plestiodon_obsoletus</i>        | 1 | 0 | 0 | 0 |
| <i>Plestiodon_ochoterenae</i>      | 0 | 0 | 0 | 0 |
| <i>Plestiodon_parviauriculatus</i> | - | 0 | 0 | 0 |
| <i>Plestiodon_parvulus</i>         | - | 0 | 0 | 0 |
| <i>Plestiodon_quadrilineatus</i>   | 1 | 0 | 0 | 0 |
| <i>Plestiodon_reynoldsi</i>        | 1 | 0 | 0 | 0 |
| <i>Plestiodon_septentrionalis</i>  | 1 | 0 | 0 | 0 |
| <i>Plestiodon_skiltonianus</i>     | 1 | 0 | 0 | 0 |
| <i>Plestiodon_stimpsonii</i>       | - | 0 | 0 | 0 |
| <i>Plestiodon_sumichrasti</i>      | - | 0 | 0 | 0 |
| <i>Plestiodon_tamdaoensis</i>      | - | 0 | 0 | 0 |
| <i>Plestiodon_tetragrammus</i>     | 1 | 0 | 0 | 0 |
| <i>Plestiodon_tunganus</i>         | - | 0 | 0 | 0 |
| <i>Pletholax_gracilis</i>          | 1 | 0 | 0 | 0 |
| <i>Plica_lumaria</i>               | 1 | 0 | 0 | 0 |
| <i>Plica_plica</i>                 | 1 | 0 | 0 | 0 |
| <i>Plica_umbra</i>                 | 1 | 0 | 0 | 0 |
| <i>Podarcis_atrata</i>             | 1 | 0 | 0 | 0 |
| <i>Podarcis_bocagei</i>            | 1 | 0 | 0 | 0 |
| <i>Podarcis_carbonelli</i>         | 1 | 0 | 0 | 0 |
| <i>Podarcis_erhardii</i>           | 1 | 0 | 0 | 0 |
| <i>Podarcis_filfolensis</i>        | 1 | 0 | 0 | 0 |
| <i>Podarcis_gaigeae</i>            | 1 | 0 | 0 | 0 |
| <i>Podarcis_hispanica</i>          | - | 0 | 0 | 0 |
| <i>Podarcis_lilfordi</i>           | 1 | 0 | 0 | 0 |
| <i>Podarcis_melisellensis</i>      | 1 | 0 | 0 | 0 |
| <i>Podarcis_milensis</i>           | 1 | 0 | 0 | 0 |
| <i>Podarcis_muralis</i>            | 1 | 0 | 0 | 0 |
| <i>Podarcis_peloponnesiaca</i>     | - | 0 | 0 | 0 |
| <i>Podarcis_pityusensis</i>        | 1 | 0 | 0 | 0 |
| <i>Podarcis_raffonei</i>           | 1 | 0 | 0 | 0 |
| <i>Podarcis_siculus</i>            | 1 | 0 | 0 | 0 |
| <i>Podarcis_taurica</i>            | - | 0 | 0 | 0 |
| <i>Podarcis_tiliguerta</i>         | 1 | 0 | 0 | 0 |

|                                       |   |   |   |   |
|---------------------------------------|---|---|---|---|
| <i>Podarcis_vaucheri</i>              | 1 | 0 | 0 | 0 |
| <i>Pogona_barbata</i>                 | 1 | 1 | 0 | 0 |
| <i>Pogona_henrylawsoni</i>            | 1 | 0 | 0 | 0 |
| <i>Pogona_minima</i>                  | 1 | 0 | 0 | 0 |
| <i>Pogona_minor</i>                   | 1 | 0 | 0 | 0 |
| <i>Pogona_nullarbor</i>               | 1 | 0 | 0 | 0 |
| <i>Pogona_vitticeps</i>               | 1 | 0 | 0 | 0 |
| <i>Polemon_acanthias</i>              | 1 | 0 | 0 | 0 |
| <i>Polemon_collaris</i>               | 1 | 0 | 0 | 0 |
| <i>Polemon_notatum</i>                | - | 0 | 0 | 0 |
| <i>Polychrus_acutirostris</i>         | 1 | 0 | 0 | 0 |
| <i>Polychrus_femoralis</i>            | 1 | 0 | 0 | 0 |
| <i>Polychrus_gutturosus</i>           | 1 | 0 | 0 | 0 |
| <i>Polychrus_marmoratus</i>           | 1 | 0 | 0 | 0 |
| <i>Polyodontognathus_caerulescens</i> | 0 | 0 | 0 | 0 |
| <i>Poromera_fordii</i>                | 1 | 0 | 0 | 0 |
| <i>Porthidium_arcosae</i>             | - | 0 | 0 | 0 |
| <i>Porthidium_dunni</i>               | 0 | 0 | 0 | 0 |
| <i>Porthidium_hesperie</i>            | 0 | 0 | 0 | 0 |
| <i>Porthidium_lansbergii</i>          | 0 | 0 | 0 | 0 |
| <i>Porthidium_nasutum</i>             | 0 | 0 | 0 | 0 |
| <i>Porthidium_ophryomegas</i>         | 0 | 0 | 0 | 0 |
| <i>Porthidium_porrasi</i>             | 0 | 0 | 0 | 0 |
| <i>Porthidium_yucatanicum</i>         | 0 | 0 | 0 | 0 |
| <i>Praescutata_viperina</i>           | 0 | 0 | 0 | 0 |
| <i>Prasinohaema_virens</i>            | 1 | 0 | 0 | 0 |
| <i>Prionodactylus_argulus</i>         | - | 0 | 0 | 0 |
| <i>Prionodactylus_eigenmanni</i>      | - | 0 | 0 | 0 |
| <i>Prionodactylus_oshaghnessyi</i>    | - | 0 | 0 | 0 |
| <i>Pristidactylus_scapulatus</i>      | 1 | 0 | 0 | 0 |
| <i>Pristidactylus_torquatus</i>       | 1 | 0 | 0 | 0 |
| <i>Pristurus_abdelkuri</i>            | 1 | 1 | 0 | 0 |
| <i>Pristurus_carteri</i>              | 1 | 1 | 0 | 0 |
| <i>Pristurus_celerrimus</i>           | 1 | 1 | 0 | 0 |
| <i>Pristurus_crucifer</i>             | 1 | 1 | 0 | 0 |
| <i>Pristurus_flavipunctatus</i>       | 1 | 1 | 0 | 0 |
| <i>Pristurus_guichardi</i>            | 1 | 1 | 0 | 0 |
| <i>Pristurus_insignis</i>             | 1 | 1 | 0 | 0 |
| <i>Pristurus_minimus</i>              | 1 | 1 | 0 | 0 |
| <i>Pristurus_rupestris</i>            | 1 | 1 | 0 | 0 |
| <i>Pristurus_sokotranus</i>           | 1 | 1 | 0 | 0 |
| <i>Pristurus_somalicus</i>            | 1 | 1 | 0 | 0 |
| <i>Proablepharus_reginae</i>          | 1 | 0 | 0 | 0 |
| <i>Proatheris_superciliaris</i>       | 0 | 0 | 0 | 0 |



|                                       |   |   |   |   |
|---------------------------------------|---|---|---|---|
| <i>Procellosaurinus_erythrocerus</i>  | 1 | 0 | 0 | 0 |
| <i>Procellosaurinus_tetradactylus</i> | 1 | 0 | 0 | 0 |
| <i>Proctoporus_bolivianus</i>         | 1 | 0 | 0 | 0 |
| <i>Proctoporus_colomaromani</i>       | - | 0 | 0 | 0 |
| <i>Proctoporus_guentheri</i>          | 1 | 0 | 0 | 0 |
| <i>Proctoporus_pachyurus</i>          | 1 | 0 | 0 | 0 |
| <i>Proctoporus_subsolanus</i>         | 1 | 0 | 0 | 0 |
| <i>Proctoporus_sucullucu</i>          | 1 | 0 | 0 | 0 |
| <i>Proctoporus_unsaacae</i>           | 1 | 0 | 0 | 0 |
| <i>Proctoporus_ventrimaculatus</i>    | - | 0 | 0 | 0 |
| <i>Proscelotes_eggeli</i>             | 0 | 0 | 0 | 0 |
| <i>Prosymna_greigerti</i>             | 1 | 0 | 0 | 0 |
| <i>Prosymna_janii</i>                 | 1 | 0 | 0 | 0 |
| <i>Prosymna_meleagris</i>             | 1 | 0 | 0 | 0 |
| <i>Prosymna_ruspolii</i>              | 1 | 0 | 0 | 0 |
| <i>Prosymna_visseri</i>               | 1 | 0 | 0 | 0 |
| <i>Protobothrops_cornutus</i>         | 1 | 0 | 0 | 0 |
| <i>Protobothrops_elegans</i>          | 1 | 0 | 0 | 0 |
| <i>Protobothrops_jerdonii</i>         | - | 0 | 0 | 0 |
| <i>Protobothrops_kaulbacki</i>        | 1 | 0 | 0 | 0 |
| <i>Protobothrops_mucrosquamatus</i>   | 1 | 0 | 0 | 0 |
| <i>Protobothrops_xiangchengensis</i>  | 1 | 0 | 0 | 0 |
| <i>Psammodromus_algirus</i>           | 1 | 0 | 0 | 0 |
| <i>Psammodromus_blanci</i>            | 1 | 0 | 0 | 0 |
| <i>Psammodromus_hispanicus</i>        | 1 | 0 | 0 | 0 |
| <i>Psammodynastes_pulverulentus</i>   | 0 | 0 | 0 | 0 |
| <i>Psammophis_angolensis</i>          | 1 | 0 | 0 | 0 |
| <i>Psammophis_biseriatus</i>          | 1 | 0 | 0 | 0 |
| <i>Psammophis_condanarus</i>          | 1 | 0 | 0 | 0 |
| <i>Psammophis_crucifer</i>            | 1 | 0 | 0 | 0 |
| <i>Psammophis_jallae</i>              | 1 | 0 | 0 | 0 |
| <i>Psammophis_leightoni</i>           | 1 | 0 | 0 | 0 |
| <i>Psammophis_leopardinus</i>         | 1 | 0 | 0 | 0 |
| <i>Psammophis_lineatus</i>            | 1 | 0 | 0 | 0 |
| <i>Psammophis_lineolatus</i>          | 1 | 0 | 0 | 0 |
| <i>Psammophis_mossambicus</i>         | 1 | 0 | 0 | 0 |
| <i>Psammophis_notostictus</i>         | 1 | 0 | 0 | 0 |
| <i>Psammophis_orientalis</i>          | 1 | 0 | 0 | 0 |
| <i>Psammophis_phillipsi</i>           | 1 | 0 | 0 | 0 |
| <i>Psammophis_praeoratus</i>          | 1 | 0 | 0 | 0 |
| <i>Psammophis_punctulatus</i>         | 1 | 0 | 0 | 0 |
| <i>Psammophis_rukwae</i>              | 1 | 0 | 0 | 0 |
| <i>Psammophis_schokari</i>            | 1 | 0 | 0 | 0 |
| <i>Psammophis_sibilans</i>            | 1 | 0 | 0 | 0 |

|                                      |   |   |   |   |
|--------------------------------------|---|---|---|---|
| <i>Psammophis_sp._sudanensis</i>     | - | 0 | 0 | 0 |
| <i>Psammophis_subtaeniatus</i>       | 1 | 0 | 0 | 0 |
| <i>Psammophis_tanganicus</i>         | 1 | 0 | 0 | 0 |
| <i>Psammophis_trigrammus</i>         | 1 | 0 | 0 | 0 |
| <i>Psammophylax_rhombeatus</i>       | 1 | 0 | 0 | 0 |
| <i>Psammophylax_tritaeniatus</i>     | 1 | 0 | 0 | 0 |
| <i>Psammophylax_variabilis</i>       | - | 0 | 0 | 0 |
| <i>Pseudablables_agassizii</i>       | 1 | 0 | 0 | 0 |
| <i>Pseudaspis_cana</i>               | 0 | 0 | 0 | 0 |
| <i>Pseudechis_australis</i>          | 1 | 0 | 0 | 0 |
| <i>Pseudechis_butleri</i>            | 1 | 0 | 0 | 0 |
| <i>Pseudechis_colletti</i>           | 1 | 0 | 0 | 0 |
| <i>Pseudechis_guttatus</i>           | 1 | 0 | 0 | 0 |
| <i>Pseudechis_papuanus</i>           | 1 | 0 | 0 | 0 |
| <i>Pseudechis_porphyriacus</i>       | 0 | 0 | 0 | 0 |
| <i>Pseudelaphe_flavirufa</i>         | 1 | 0 | 0 | 0 |
| <i>Pseudemoia_entrecasteauxii</i>    | 0 | 0 | 0 | 0 |
| <i>Pseudemoia_pagenstecheri</i>      | 0 | 0 | 0 | 0 |
| <i>Pseuderemias_smithii</i>          | 1 | 0 | 0 | 0 |
| <i>Pseudoacantias_menamainty</i>     | - | 0 | 0 | 0 |
| <i>Pseudoboa_coronata</i>            | 1 | 0 | 0 | 0 |
| <i>Pseudoboa_neuwiedii</i>           | 1 | 0 | 0 | 0 |
| <i>Pseudoboa_nigra</i>               | 1 | 0 | 0 | 0 |
| <i>Pseudoboodon_lemniscatus</i>      | 1 | 0 | 0 | 0 |
| <i>Pseudocalotes_brevipes</i>        | 1 | 0 | 0 | 0 |
| <i>Pseudocalotes_flavigula</i>       | 1 | 0 | 0 | 0 |
| <i>Pseudocerastes_persicus</i>       | 1 | 0 | 0 | 0 |
| <i>Pseudocordylus_langi</i>          | - | 0 | 0 | 0 |
| <i>Pseudocordylus_melanotus</i>      | - | 0 | 0 | 0 |
| <i>Pseudocordylus_microlepidotus</i> | - | 0 | 0 | 0 |
| <i>Pseudocordylus_spinosus</i>       | - | 0 | 0 | 0 |
| <i>Pseudoeryx_plicatilis</i>         | 0 | 0 | 0 | 0 |
| <i>Pseudoficimia_frontalis</i>       | 1 | 0 | 0 | 0 |
| <i>Pseudogekko_compressicorpus</i>   | 1 | 1 | 0 | 0 |
| <i>Pseudogekko_smaragdinus</i>       | 1 | 1 | 0 | 0 |
| <i>Pseudogonatodes_guianensis</i>    | 1 | 1 | 0 | 0 |
| <i>Pseudogonatodes_lunulatus</i>     | 1 | 1 | 0 | 0 |
| <i>Pseudogonatodes_manessi</i>       | 1 | 1 | 0 | 0 |
| <i>Pseudoleptodeira_latifasciata</i> | 1 | 0 | 0 | 0 |
| <i>Pseudonaja_modesta</i>            | 1 | 0 | 0 | 0 |
| <i>Pseudonaja_textilis</i>           | 1 | 0 | 0 | 0 |
| <i>Pseudopus_apodus</i>              | 1 | 0 | 0 | 0 |
| <i>Pseudorabdion_oxycephalum</i>     | 1 | 0 | 0 | 0 |
| <i>Pseudothecadactylus_australis</i> | 1 | 0 | 0 | 0 |

|                                      |   |   |   |   |
|--------------------------------------|---|---|---|---|
| <i>Pseudothecadactylus lindneri</i>  | 1 | 0 | 0 | 0 |
| <i>Pseudotomodon trigonatus</i>      | 0 | 0 | 0 | 0 |
| <i>Pseudotrapelus sinaitus</i>       | 1 | 0 | 0 | 0 |
| <i>Pseudotyphlops philippinus</i>    | 0 | 0 | 0 | 0 |
| <i>Pseudoxenodon bambusicola</i>     | 1 | 0 | 0 | 0 |
| <i>Pseudoxenodon karlschmidti</i>    | 1 | 0 | 0 | 0 |
| <i>Pseudoxenodon macrops</i>         | 1 | 0 | 0 | 0 |
| <i>Pseudoxyrhopus ambreensis</i>     | 1 | 0 | 0 | 0 |
| <i>Pseustes sulphureus</i>           | 1 | 0 | 0 | 0 |
| <i>Psilophthalmus paeminosus</i>     | 1 | 0 | 0 | 0 |
| <i>Psomophis genimaculatus</i>       | 1 | 0 | 0 | 0 |
| <i>Psomophis joberti</i>             | 1 | 0 | 0 | 0 |
| <i>Psychosaura agmosticha</i>        | - | 0 | 0 | 0 |
| <i>Psychosaura macrorhyncha</i>      | - | 0 | 0 | 0 |
| <i>Ptenopus carpi</i>                | 1 | 1 | 0 | 0 |
| <i>Ptyas korros</i>                  | 1 | 0 | 0 | 0 |
| <i>Ptyas mucosus</i>                 | - | 0 | 0 | 0 |
| <i>Ptychoglossus brevifrontalis</i>  | 1 | 0 | 0 | 0 |
| <i>Ptychophis flavovirgatus</i>      | 0 | 0 | 0 | 0 |
| <i>Ptychozoon kuhli</i>              | 1 | 1 | 0 | 0 |
| <i>Ptychozoon lionotum</i>           | 1 | 1 | 0 | 0 |
| <i>Ptychozoon rhacophorus</i>        | 1 | 1 | 0 | 0 |
| <i>Ptyctolaemus collicristatus</i>   | 1 | 0 | 0 | 0 |
| <i>Ptyctolaemus gularis</i>          | 1 | 0 | 0 | 0 |
| <i>Ptyodactylus guttatus</i>         | 1 | 1 | 0 | 0 |
| <i>Ptyodactylus hasselquistii</i>    | 1 | 1 | 0 | 0 |
| <i>Ptyodactylus oudrii</i>           | 1 | 1 | 0 | 0 |
| <i>Ptyodactylus ragazzii</i>         | 1 | 1 | 0 | 0 |
| <i>Pygomeles braconneri</i>          | - | 0 | 0 | 0 |
| <i>Pygopus lepidopodus</i>           | 1 | 0 | 0 | 0 |
| <i>Pygopus nigriceps</i>             | 1 | 0 | 0 | 0 |
| <i>Pygopus orientalis</i>            | - | 0 | 0 | 0 |
| <i>Pygopus schraderi</i>             | - | 0 | 0 | 0 |
| <i>Python brongersmai</i>            | 1 | 0 | 0 | 0 |
| <i>Python curtus</i>                 | 1 | 0 | 0 | 0 |
| <i>Python molurus</i>                | 1 | 0 | 0 | 0 |
| <i>Python regius</i>                 | 1 | 0 | 0 | 0 |
| <i>Python reticulatus</i>            | - | 0 | 0 | 0 |
| <i>Python sebae</i>                  | 1 | 0 | 0 | 0 |
| <i>Python timoriensis</i>            | - | 0 | 0 | 0 |
| <i>Pythonodipsas carinata</i>        | 1 | 0 | 0 | 0 |
| <i>Quedenfeldtia moerens</i>         | 1 | 1 | 0 | 0 |
| <i>Quedenfeldtia trachyblepharus</i> | 1 | 1 | 0 | 0 |
| <i>Ramphotyphlops acuticauda</i>     | 1 | 0 | 0 | 0 |

|                                      |   |   |   |   |
|--------------------------------------|---|---|---|---|
| <i>Ramphotyphlops_albiceps</i>       | 1 | 0 | 0 | 0 |
| <i>Ramphotyphlops_australis</i>      | - | 0 | 0 | 0 |
| <i>Ramphotyphlops_bicolor</i>        | 1 | 0 | 0 | 0 |
| <i>Ramphotyphlops_bituberculatus</i> | - | 0 | 0 | 0 |
| <i>Ramphotyphlops_braminus</i>       | 1 | 0 | 0 | 0 |
| <i>Ramphotyphlops_grypus</i>         | - | 0 | 0 | 0 |
| <i>Ramphotyphlops_hamatus</i>        | - | 0 | 0 | 0 |
| <i>Ramphotyphlops_leptosoma</i>      | - | 0 | 0 | 0 |
| <i>Ramphotyphlops_lineatus</i>       | 1 | 0 | 0 | 0 |
| <i>Ramphotyphlops_longissimus</i>    | - | 0 | 0 | 0 |
| <i>Ramphotyphlops_pilbarensis</i>    | - | 0 | 0 | 0 |
| <i>Ramphotyphlops_polygrammicus</i>  | 1 | 0 | 0 | 0 |
| <i>Ramphotyphlops_sp._NNV-2010a</i>  | - | 0 | 0 | 0 |
| <i>Ramphotyphlops_unguistrostris</i> | - | 0 | 0 | 0 |
| <i>Ramphotyphlops_waitii</i>         | - | 0 | 0 | 0 |
| <i>Rankinia_diemensis</i>            | 1 | 0 | 0 | 0 |
| <i>Regina_alleni</i>                 | 0 | 0 | 0 | 0 |
| <i>Regina_grahami</i>                | 0 | 0 | 0 | 0 |
| <i>Regina_rigida</i>                 | 0 | 0 | 0 | 0 |
| <i>Regina_septemvittata</i>          | 0 | 0 | 0 | 0 |
| <i>Rena_dissecta</i>                 | - | 0 | 0 | 0 |
| <i>Rena_dulcis</i>                   | - | 0 | 0 | 0 |
| <i>Rena_humilis</i>                  | - | 0 | 0 | 0 |
| <i>Rena_sp._B_SBH-2010</i>           | - | 0 | 0 | 0 |
| <i>Rhabdophis_nuchalis</i>           | 1 | 0 | 0 | 0 |
| <i>Rhabdophis_subminiatus</i>        | 1 | 0 | 0 | 0 |
| <i>Rhabdophis_tigrinus</i>           | 1 | 0 | 0 | 0 |
| <i>Rhachisaurus_brachylepis</i>      | 1 | 0 | 0 | 0 |
| <i>Rhacodactylus_auriculatus</i>     | 1 | 0 | 0 | 0 |
| <i>Rhacodactylus_chahoua</i>         | 1 | 0 | 0 | 0 |
| <i>Rhacodactylus_ciliatus</i>        | 1 | 0 | 0 | 0 |
| <i>Rhacodactylus_leachianus</i>      | 1 | 0 | 0 | 0 |
| <i>Rhacodactylus_sarasinorum</i>     | 1 | 0 | 0 | 0 |
| <i>Rhacodactylus_trachyrhynchus</i>  | 0 | 0 | 0 | 0 |
| <i>Rhadinaea_flavilata</i>           | 1 | 0 | 0 | 0 |
| <i>Rhadinaea_fulvivittis</i>         | 1 | 0 | 0 | 0 |
| <i>Rhadinophis_frenatus</i>          | - | 0 | 0 | 0 |
| <i>Rhadinophis_prasinus</i>          | - | 0 | 0 | 0 |
| <i>Rhamphiophis_acutus</i>           | - | 0 | 0 | 0 |
| <i>Rhamphiophis_oxyrhynchus</i>      | 1 | 0 | 0 | 0 |
| <i>Rhamphiophis_rubropunctatus</i>   | 1 | 0 | 0 | 0 |
| <i>Rhampholeon_acuminatus</i>        | 1 | 0 | 0 | 0 |
| <i>Rhampholeon_beraduccii</i>        | 1 | 0 | 0 | 0 |
| <i>Rhampholeon_boulengeri</i>        | 1 | 0 | 0 | 0 |

|                                   |   |   |   |   |
|-----------------------------------|---|---|---|---|
| <i>Rhampholeon_chapmanorum</i>    | 1 | 0 | 0 | 0 |
| <i>Rhampholeon_gorongosae</i>     | - | 0 | 0 | 0 |
| <i>Rhampholeon_marshalli</i>      | 1 | 0 | 0 | 0 |
| <i>Rhampholeon_moyeri</i>         | 1 | 0 | 0 | 0 |
| <i>Rhampholeon_nchisiensis</i>    | 1 | 0 | 0 | 0 |
| <i>Rhampholeon_platyceps</i>      | 1 | 0 | 0 | 0 |
| <i>Rhampholeon_spectrum</i>       | 1 | 0 | 0 | 0 |
| <i>Rhampholeon_spinosus</i>       | 1 | 0 | 0 | 0 |
| <i>Rhampholeon_temporalis</i>     | 1 | 0 | 0 | 0 |
| <i>Rhampholeon_uluguruensis</i>   | 1 | 0 | 0 | 0 |
| <i>Rhampholeon_viridis</i>        | 1 | 0 | 0 | 0 |
| <i>Rhinechis_scalaris</i>         | 1 | 0 | 0 | 0 |
| <i>Rhineura_floridana</i>         | 1 | 0 | 0 | 0 |
| <i>Rhinobothryum_lentiginosum</i> | 1 | 0 | 0 | 0 |
| <i>Rhinocheilus_lecontei</i>      | 1 | 0 | 0 | 0 |
| <i>Rhinoleptus_koniagui</i>       | 1 | 0 | 0 | 0 |
| <i>Rhinophis_blythii</i>          | 0 | 0 | 0 | 0 |
| <i>Rhinophis_dorsimaculatus</i>   | 0 | 0 | 0 | 0 |
| <i>Rhinophis_drummondhayi</i>     | 0 | 0 | 0 | 0 |
| <i>Rhinophis_homolepis</i>        | 0 | 0 | 0 | 0 |
| <i>Rhinophis_oxyrhynchus</i>      | 0 | 0 | 0 | 0 |
| <i>Rhinophis_philippinus</i>      | 0 | 0 | 0 | 0 |
| <i>Rhinophis_travancoricus</i>    | 0 | 0 | 0 | 0 |
| <i>Rhinoplocephalus_bicolor</i>   | 0 | 0 | 0 | 0 |
| <i>Rhinotyphlops_faeae</i>        | 1 | 0 | 0 | 0 |
| <i>Rhinotyphlops_lalandei</i>     | 1 | 0 | 0 | 0 |
| <i>Rhinotyphlops_newtoni</i>      | 1 | 0 | 0 | 0 |
| <i>Rhoptropella_ocellata</i>      | - | 1 | 0 | 0 |
| <i>Rhoptropus_afer</i>            | 1 | 1 | 0 | 0 |
| <i>Rhoptropus_barnardi</i>        | 1 | 1 | 0 | 0 |
| <i>Rhoptropus_biporosus</i>       | 1 | 1 | 0 | 0 |
| <i>Rhoptropus_boultoni</i>        | 1 | 1 | 0 | 0 |
| <i>Rhoptropus_bradfieldi</i>      | 1 | 1 | 0 | 0 |
| <i>Rhynchoedura_ornata</i>        | 1 | 0 | 0 | 0 |
| <i>Rhynchophis_boulengeri</i>     | 1 | 0 | 0 | 0 |
| <i>Riama_simotera</i>             | - | 0 | 0 | 0 |
| <i>Riama_unicolor</i>             | 1 | 0 | 0 | 0 |
| <i>Rieppeleon_brachyurus</i>      | 1 | 0 | 0 | 0 |
| <i>Rieppeleon_brevicaudatus</i>   | 1 | 0 | 0 | 0 |
| <i>Rieppeleon_kerstenii</i>       | 1 | 0 | 0 | 0 |
| <i>Ristella_rurkii</i>            | - | 0 | 0 | 0 |
| <i>Saara_asmussi</i>              | - | 0 | 0 | 0 |
| <i>Saara_hardwickii</i>           | - | 0 | 0 | 0 |
| <i>Saara_loricata</i>             | - | 0 | 0 | 0 |

|                                   |   |   |   |   |
|-----------------------------------|---|---|---|---|
| <i>Saiphos_equalis</i>            | - | 0 | 0 | 0 |
| <i>Salea_horsfieldii</i>          | 1 | 0 | 0 | 0 |
| <i>Salea_kakhienensis</i>         | 1 | 0 | 0 | 0 |
| <i>Saltuarius_cornutus</i>        | 1 | 0 | 0 | 0 |
| <i>Saltuarius_kateae</i>          | 1 | 0 | 0 | 0 |
| <i>Saltuarius_moritzi</i>         | 1 | 0 | 0 | 0 |
| <i>Saltuarius_salebrosus</i>      | 1 | 0 | 0 | 0 |
| <i>Saltuarius_swaini</i>          | 1 | 0 | 0 | 0 |
| <i>Saltuarius_wyberba</i>         | 1 | 0 | 0 | 0 |
| <i>Salvadora_mexicana</i>         | 1 | 0 | 0 | 0 |
| <i>Sanzinia_madagascariensis</i>  | 0 | 0 | 0 | 0 |
| <i>Saproscincus_basiliscus</i>    | 1 | 0 | 0 | 0 |
| <i>Saproscincus_challengeri</i>   | 1 | 0 | 0 | 0 |
| <i>Saproscincus_czechurai</i>     | 1 | 0 | 0 | 0 |
| <i>Saproscincus_hannahae</i>      | 1 | 0 | 0 | 0 |
| <i>Saproscincus_lewisi</i>        | 1 | 0 | 0 | 0 |
| <i>Saproscincus_mustelinus</i>    | 1 | 0 | 0 | 0 |
| <i>Saproscincus_oriarius</i>      | 1 | 0 | 0 | 0 |
| <i>Saproscincus_rosei</i>         | 1 | 0 | 0 | 0 |
| <i>Saproscincus_spectabilis</i>   | 1 | 0 | 0 | 0 |
| <i>Saproscincus_tetradactylus</i> | 1 | 0 | 0 | 0 |
| <i>Sauresia_agasepsoides</i>      | - | 0 | 0 | 0 |
| <i>Saurodactylus_brosseti</i>     | - | 1 | 0 | 0 |
| <i>Saurodactylus_fasciatus</i>    | 1 | 1 | 0 | 0 |
| <i>Saurodactylus_mauritanicus</i> | 1 | 1 | 0 | 0 |
| <i>Sauromalus_ater</i>            | 1 | 0 | 0 | 0 |
| <i>Sauromalus_hispidus</i>        | 1 | 0 | 0 | 0 |
| <i>Sauromalus_klauberi</i>        | 1 | 0 | 0 | 0 |
| <i>Sauromalus_varius</i>          | 1 | 0 | 0 | 0 |
| <i>Scaphiodontophis_annulatus</i> | 1 | 0 | 0 | 0 |
| <i>Scaphiophis_albopunctatus</i>  | 1 | 0 | 0 | 0 |
| <i>Scelarcis_perspicillata</i>    | 1 | 0 | 0 | 0 |
| <i>Sceloporus_adleri</i>          | 0 | 0 | 0 | 0 |
| <i>Sceloporus_aeneus</i>          | - | 0 | 0 | 0 |
| <i>Sceloporus_angustus</i>        | 1 | 0 | 0 | 0 |
| <i>Sceloporus_arenicolus</i>      | 1 | 0 | 0 | 0 |
| <i>Sceloporus_bicanthalis</i>     | 0 | 0 | 0 | 0 |
| <i>Sceloporus_bulleri</i>         | 0 | 0 | 0 | 0 |
| <i>Sceloporus_carinatus</i>       | 1 | 0 | 0 | 0 |
| <i>Sceloporus_cautus</i>          | 1 | 0 | 0 | 0 |
| <i>Sceloporus_chaneyi</i>         | 1 | 0 | 0 | 0 |
| <i>Sceloporus_chrysostictus</i>   | 1 | 0 | 0 | 0 |
| <i>Sceloporus_clarkii</i>         | 1 | 0 | 0 | 0 |
| <i>Sceloporus_consobrinus</i>     | 1 | 0 | 0 | 0 |

|                                  |   |   |   |   |
|----------------------------------|---|---|---|---|
| <i>Sceloporus_couchii</i>        | 1 | 0 | 0 | 0 |
| <i>Sceloporus_cozumelae</i>      | 1 | 0 | 0 | 0 |
| <i>Sceloporus_cryptus</i>        | - | 0 | 0 | 0 |
| <i>Sceloporus_cyanogenys</i>     | 0 | 0 | 0 | 0 |
| <i>Sceloporus_dugesii</i>        | 0 | 0 | 0 | 0 |
| <i>Sceloporus_edwardtaylori</i>  | 1 | 0 | 0 | 0 |
| <i>Sceloporus_formosus</i>       | 0 | 0 | 0 | 0 |
| <i>Sceloporus_gadoviae</i>       | 1 | 0 | 0 | 0 |
| <i>Sceloporus_goldmani</i>       | 0 | 0 | 0 | 0 |
| <i>Sceloporus_graciosus</i>      | 1 | 0 | 0 | 0 |
| <i>Sceloporus_grammicus</i>      | 0 | 0 | 0 | 0 |
| <i>Sceloporus_grandaevus</i>     | 1 | 0 | 0 | 0 |
| <i>Sceloporus_heterolepis</i>    | 0 | 0 | 0 | 0 |
| <i>Sceloporus_horridus</i>       | 1 | 0 | 0 | 0 |
| <i>Sceloporus_hunsakeri</i>      | 1 | 0 | 0 | 0 |
| <i>Sceloporus_insignis</i>       | 0 | 0 | 0 | 0 |
| <i>Sceloporus_jalapae</i>        | 1 | 0 | 0 | 0 |
| <i>Sceloporus_jarrovii</i>       | 0 | 0 | 0 | 0 |
| <i>Sceloporus_licki</i>          | 1 | 0 | 0 | 0 |
| <i>Sceloporus_lineatulus</i>     | - | 0 | 0 | 0 |
| <i>Sceloporus_lineolateralis</i> | - | 0 | 0 | 0 |
| <i>Sceloporus_lundelli</i>       | 1 | 0 | 0 | 0 |
| <i>Sceloporus_macdougalli</i>    | 0 | 0 | 0 | 0 |
| <i>Sceloporus_maculosus</i>      | 1 | 0 | 0 | 0 |
| <i>Sceloporus_magister</i>       | 1 | 0 | 0 | 0 |
| <i>Sceloporus_malachiticus</i>   | 0 | 0 | 0 | 0 |
| <i>Sceloporus_megalepidurus</i>  | 0 | 0 | 0 | 0 |
| <i>Sceloporus_melanorhinus</i>   | 1 | 0 | 0 | 0 |
| <i>Sceloporus_merriami</i>       | 1 | 0 | 0 | 0 |
| <i>Sceloporus_minor</i>          | - | 0 | 0 | 0 |
| <i>Sceloporus_mucronatus</i>     | 0 | 0 | 0 | 0 |
| <i>Sceloporus_nelsoni</i>        | 1 | 0 | 0 | 0 |
| <i>Sceloporus_occidentalis</i>   | 1 | 0 | 0 | 0 |
| <i>Sceloporus_ochoterenae</i>    | 1 | 0 | 0 | 0 |
| <i>Sceloporus_olivaceus</i>      | 1 | 0 | 0 | 0 |
| <i>Sceloporus_orcutti</i>        | 1 | 0 | 0 | 0 |
| <i>Sceloporus_ornatus</i>        | 0 | 0 | 0 | 0 |
| <i>Sceloporus_palaciosi</i>      | 0 | 0 | 0 | 0 |
| <i>Sceloporus_parvus</i>         | 1 | 0 | 0 | 0 |
| <i>Sceloporus_pictus</i>         | - | 0 | 0 | 0 |
| <i>Sceloporus_poinsettii</i>     | 0 | 0 | 0 | 0 |
| <i>Sceloporus_pyrocephalus</i>   | 1 | 0 | 0 | 0 |
| <i>Sceloporus_samcolemanni</i>   | - | 0 | 0 | 0 |
| <i>Sceloporus_scalaris</i>       | 1 | 0 | 0 | 0 |

|                                   |   |   |   |   |
|-----------------------------------|---|---|---|---|
| <i>Sceloporus_serrifer</i>        | 0 | 0 | 0 | 0 |
| <i>Sceloporus_siniferus</i>       | 1 | 0 | 0 | 0 |
| <i>Sceloporus_slevini</i>         | 1 | 0 | 0 | 0 |
| <i>Sceloporus_smaragdinus</i>     | 0 | 0 | 0 | 0 |
| <i>Sceloporus_smithi</i>          | - | 0 | 0 | 0 |
| <i>Sceloporus_spinosus</i>        | 1 | 0 | 0 | 0 |
| <i>Sceloporus_squamosus</i>       | 1 | 0 | 0 | 0 |
| <i>Sceloporus_stejnegeri</i>      | 0 | 0 | 0 | 0 |
| <i>Sceloporus_subpictus</i>       | - | 0 | 0 | 0 |
| <i>Sceloporus_taeniocnemis</i>    | - | 0 | 0 | 0 |
| <i>Sceloporus_teapensis</i>       | 1 | 0 | 0 | 0 |
| <i>Sceloporus_torquatus</i>       | 0 | 0 | 0 | 0 |
| <i>Sceloporus_undulatus</i>       | 1 | 0 | 0 | 0 |
| <i>Sceloporus_utiformis</i>       | 1 | 0 | 0 | 0 |
| <i>Sceloporus_vandenburgianus</i> | 1 | 0 | 0 | 0 |
| <i>Sceloporus_variabilis</i>      | 1 | 0 | 0 | 0 |
| <i>Sceloporus_virgatus</i>        | 1 | 0 | 0 | 0 |
| <i>Sceloporus_woodi</i>           | 1 | 0 | 0 | 0 |
| <i>Sceloporus_zosteromus</i>      | 1 | 0 | 0 | 0 |
| <i>Scelotes_anguina</i>           | - | 0 | 0 | 0 |
| <i>Scelotes_arenicolus</i>        | 0 | 0 | 0 | 0 |
| <i>Scelotes_bipes</i>             | 0 | 0 | 0 | 0 |
| <i>Scelotes_caffer</i>            | 0 | 0 | 0 | 0 |
| <i>Scelotes_gronovii</i>          | 0 | 0 | 0 | 0 |
| <i>Scelotes_kasneri</i>           | 0 | 0 | 0 | 0 |
| <i>Scelotes_mirus</i>             | 0 | 0 | 0 | 0 |
| <i>Scelotes_montispectus</i>      | 0 | 0 | 0 | 0 |
| <i>Scelotes_sexlineatus</i>       | 0 | 0 | 0 | 0 |
| <i>Scincella_gemmingeri</i>       | - | 0 | 0 | 0 |
| <i>Scincella_lateralis</i>        | 1 | 0 | 0 | 0 |
| <i>Scincella_reevesii</i>         | - | 0 | 0 | 0 |
| <i>Scincopus_fasciatus</i>        | - | 0 | 0 | 0 |
| <i>Scincus_mitrans</i>            | 0 | 0 | 0 | 0 |
| <i>Scincus_scincus</i>            | - | 0 | 0 | 0 |
| <i>Seminatrix_pygaea</i>          | 0 | 0 | 0 | 0 |
| <i>Senticolis_triaspis</i>        | 1 | 0 | 0 | 0 |
| <i>Sepsina_angolensis</i>         | 0 | 0 | 0 | 0 |
| <i>Shinisaurus_crocodilurus</i>   | 0 | 0 | 0 | 0 |
| <i>Siagonodon_septemstriatus</i>  | - | 0 | 0 | 0 |
| <i>Sibon_nebulatus</i>            | 1 | 0 | 0 | 0 |
| <i>Sibynomorphus_mikanii</i>      | 1 | 0 | 0 | 0 |
| <i>Sibynophis_bistrigatus</i>     | 1 | 0 | 0 | 0 |
| <i>Sibynophis_chinensis</i>       | 1 | 0 | 0 | 0 |
| <i>Sibynophis_collaris</i>        | 1 | 0 | 0 | 0 |



|                                      |   |   |   |   |
|--------------------------------------|---|---|---|---|
| <i>Sibynophis_subpunctatus</i>       | 1 | 0 | 0 | 0 |
| <i>Sibynophis_triangularis</i>       | 1 | 0 | 0 | 0 |
| <i>Sigaloseps_deplanchei</i>         | - | 0 | 0 | 0 |
| <i>Sigaloseps_ruficauda</i>          | - | 0 | 0 | 0 |
| <i>Simiscincus_aurantiacus</i>       | - | 0 | 0 | 0 |
| <i>Simoselaps_anomalus</i>           | 1 | 0 | 0 | 0 |
| <i>Simoselaps_bertholdi</i>          | 1 | 0 | 0 | 0 |
| <i>Simoselaps_bimaculatus</i>        | 1 | 0 | 0 | 0 |
| <i>Simoselaps_calonotus</i>          | 1 | 0 | 0 | 0 |
| <i>Sinomicrurus_japonicus</i>        | 1 | 0 | 0 | 0 |
| <i>Sinomicrurus_kelloggi</i>         | 1 | 0 | 0 | 0 |
| <i>Sinomicrurus_macclellandi</i>     | 1 | 0 | 0 | 0 |
| <i>Sinonatrix_aequifasciata</i>      | 1 | 0 | 0 | 0 |
| <i>Sinonatrix_annularis</i>          | 0 | 0 | 0 | 0 |
| <i>Sinonatrix_percarinata</i>        | 1 | 0 | 0 | 0 |
| <i>Siphlophis_cervinus</i>           | 1 | 0 | 0 | 0 |
| <i>Siphlophis_compressus</i>         | 1 | 0 | 0 | 0 |
| <i>Siphlophis_pulcher</i>            | 1 | 0 | 0 | 0 |
| <i>Sistrurus_catenatus</i>           | 0 | 0 | 0 | 0 |
| <i>Sistrurus_miliarius</i>           | 0 | 0 | 0 | 0 |
| <i>Sitana_ponticeriana</i>           | 1 | 0 | 0 | 0 |
| <i>Smaug_giganteus</i>               | - | 0 | 0 | 0 |
| <i>Smaug_warreni</i>                 | - | 0 | 0 | 0 |
| <i>Sonora_semiannulata</i>           | 1 | 0 | 0 | 0 |
| <i>Spalerosophis_diadema</i>         | 1 | 0 | 0 | 0 |
| <i>Spalerosophis_microlepis</i>      | 1 | 0 | 0 | 0 |
| <i>Sphaerodactylus_altavelensis</i>  | 1 | 1 | 0 | 0 |
| <i>Sphaerodactylus_argus</i>         | 1 | 1 | 0 | 0 |
| <i>Sphaerodactylus_armstrongi</i>    | 1 | 1 | 0 | 0 |
| <i>Sphaerodactylus_cinereus</i>      | 1 | 1 | 0 | 0 |
| <i>Sphaerodactylus_copei</i>         | 1 | 1 | 0 | 0 |
| <i>Sphaerodactylus_cricoderus</i>    | 1 | 1 | 0 | 0 |
| <i>Sphaerodactylus_cryphius</i>      | 1 | 1 | 0 | 0 |
| <i>Sphaerodactylus_darlingtoni</i>   | 1 | 1 | 0 | 0 |
| <i>Sphaerodactylus_elegans</i>       | 1 | 1 | 0 | 0 |
| <i>Sphaerodactylus_elegantulus</i>   | 1 | 1 | 0 | 0 |
| <i>Sphaerodactylus_fantasticus</i>   | 1 | 1 | 0 | 0 |
| <i>Sphaerodactylus_gaigeae</i>       | 1 | 1 | 0 | 0 |
| <i>Sphaerodactylus_glaucus</i>       | 1 | 1 | 0 | 0 |
| <i>Sphaerodactylus_goniorhynchus</i> | 1 | 1 | 0 | 0 |
| <i>Sphaerodactylus_intermedius</i>   | 1 | 1 | 0 | 0 |
| <i>Sphaerodactylus_kirbyi</i>        | 1 | 1 | 0 | 0 |
| <i>Sphaerodactylus_klauberi</i>      | 1 | 1 | 0 | 0 |
| <i>Sphaerodactylus_leucaster</i>     | 1 | 1 | 0 | 0 |

|                                       |   |   |   |   |
|---------------------------------------|---|---|---|---|
| <i>Sphaerodactylus_macrolepis</i>     | 1 | 1 | 0 | 0 |
| <i>Sphaerodactylus_microlepis</i>     | 1 | 1 | 0 | 0 |
| <i>Sphaerodactylus_molei</i>          | 1 | 1 | 0 | 0 |
| <i>Sphaerodactylus_nicholsi</i>       | 1 | 1 | 0 | 0 |
| <i>Sphaerodactylus_nigropunctatus</i> | 1 | 1 | 0 | 0 |
| <i>Sphaerodactylus_notatus</i>        | 1 | 1 | 0 | 0 |
| <i>Sphaerodactylus_ocoae</i>          | 1 | 1 | 0 | 0 |
| <i>Sphaerodactylus_oliveri</i>        | 1 | 1 | 0 | 0 |
| <i>Sphaerodactylus_parvus</i>         | 1 | 1 | 0 | 0 |
| <i>Sphaerodactylus_ramsdeni</i>       | 1 | 1 | 0 | 0 |
| <i>Sphaerodactylus_richardi</i>       | 1 | 1 | 0 | 0 |
| <i>Sphaerodactylus_roosevelti</i>     | 1 | 1 | 0 | 0 |
| <i>Sphaerodactylus_sabanus</i>        | 1 | 1 | 0 | 0 |
| <i>Sphaerodactylus_schwartzi</i>      | 1 | 1 | 0 | 0 |
| <i>Sphaerodactylus_semasiops</i>      | 1 | 1 | 0 | 0 |
| <i>Sphaerodactylus_shrevei</i>        | 1 | 1 | 0 | 0 |
| <i>Sphaerodactylus_sputator</i>       | 1 | 1 | 0 | 0 |
| <i>Sphaerodactylus_thompsoni</i>      | 1 | 1 | 0 | 0 |
| <i>Sphaerodactylus_torrei</i>         | 1 | 1 | 0 | 0 |
| <i>Sphaerodactylus_townsendi</i>      | 1 | 1 | 0 | 0 |
| <i>Sphaerodactylus_vincenti</i>       | 1 | 1 | 0 | 0 |
| <i>Sphenodon_punctatus</i>            | 1 | 1 | 1 | 0 |
| <i>Sphenomorphus_acutus</i>           | - | 0 | 0 | 0 |
| <i>Sphenomorphus_aesculeticola</i>    | - | 0 | 0 | 0 |
| <i>Sphenomorphus_arborens</i>         | 1 | 0 | 0 | 0 |
| <i>Sphenomorphus_assatus</i>          | 1 | 0 | 0 | 0 |
| <i>Sphenomorphus_atrigularis</i>      | - | 0 | 0 | 0 |
| <i>Sphenomorphus_beyeri</i>           | - | 0 | 0 | 0 |
| <i>Sphenomorphus_buenloicus</i>       | - | 0 | 0 | 0 |
| <i>Sphenomorphus_cherriei</i>         | 1 | 0 | 0 | 0 |
| <i>Sphenomorphus_concinnatus</i>      | 0 | 0 | 0 | 0 |
| <i>Sphenomorphus_cranei</i>           | 1 | 0 | 0 | 0 |
| <i>Sphenomorphus_cumingi</i>          | - | 0 | 0 | 0 |
| <i>Sphenomorphus_cyanolaemus</i>      | - | 0 | 0 | 0 |
| <i>Sphenomorphus_decipiens</i>        | - | 0 | 0 | 0 |
| <i>Sphenomorphus_diwata</i>           | - | 0 | 0 | 0 |
| <i>Sphenomorphus_fasciatus</i>        | - | 0 | 0 | 0 |
| <i>Sphenomorphus_hallieri</i>         | - | 0 | 0 | 0 |
| <i>Sphenomorphus_indicus</i>          | 0 | 0 | 0 | 0 |
| <i>Sphenomorphus_jobiensis</i>        | 1 | 0 | 0 | 0 |
| <i>Sphenomorphus_kitangladensis</i>   | - | 0 | 0 | 0 |
| <i>Sphenomorphus_laterimaculatus</i>  | - | 0 | 0 | 0 |
| <i>Sphenomorphus_lawtoni</i>          | - | 0 | 0 | 0 |
| <i>Sphenomorphus_leptofasciatus</i>   | 0 | 0 | 0 | 0 |

|                                     |   |   |   |   |
|-------------------------------------|---|---|---|---|
| <i>Sphenomorphus_leucospilos</i>    | - | 0 | 0 | 0 |
| <i>Sphenomorphus_luzonense</i>      | - | 0 | 0 | 0 |
| <i>Sphenomorphus_maculatus</i>      | - | 0 | 0 | 0 |
| <i>Sphenomorphus_maindroni</i>      | - | 0 | 0 | 0 |
| <i>Sphenomorphus_melanopogon</i>    | 1 | 0 | 0 | 0 |
| <i>Sphenomorphus_muelleri</i>       | 1 | 0 | 0 | 0 |
| <i>Sphenomorphus_multisquamatus</i> | 1 | 0 | 0 | 0 |
| <i>Sphenomorphus_parvus</i>         | - | 0 | 0 | 0 |
| <i>Sphenomorphus_praesignis</i>     | - | 0 | 0 | 0 |
| <i>Sphenomorphus_sabanus</i>        | 1 | 0 | 0 | 0 |
| <i>Sphenomorphus_scutatus</i>       | - | 0 | 0 | 0 |
| <i>Sphenomorphus_simus</i>          | - | 0 | 0 | 0 |
| <i>Sphenomorphus_solomonis</i>      | 1 | 0 | 0 | 0 |
| <i>Sphenomorphus_steerei</i>        | - | 0 | 0 | 0 |
| <i>Sphenomorphus_stellatus</i>      | - | 0 | 0 | 0 |
| <i>Sphenomorphus_tagapayo</i>       | - | 0 | 0 | 0 |
| <i>Sphenomorphus_variegatus</i>     | - | 0 | 0 | 0 |
| <i>Sphenomorphus_victoria</i>       | - | 0 | 0 | 0 |
| <i>Sphenomorphus_wrighti</i>        | - | 0 | 0 | 0 |
| <i>Spilotes_pullatus</i>            | 1 | 0 | 0 | 0 |
| <i>Spondylurus_sloanii</i>          | - | 0 | 0 | 0 |
| <i>Stenocercus_angel</i>            | 1 | 0 | 0 | 0 |
| <i>Stenocercus_angulifer</i>        | 1 | 0 | 0 | 0 |
| <i>Stenocercus_apurimacus</i>       | 1 | 0 | 0 | 0 |
| <i>Stenocercus_azureus</i>          | 1 | 0 | 0 | 0 |
| <i>Stenocercus_boettgeri</i>        | 1 | 0 | 0 | 0 |
| <i>Stenocercus_caducus</i>          | 1 | 0 | 0 | 0 |
| <i>Stenocercus_chota</i>            | 1 | 0 | 0 | 0 |
| <i>Stenocercus_chrysopygus</i>      | 1 | 0 | 0 | 0 |
| <i>Stenocercus_crassicaudatus</i>   | 1 | 0 | 0 | 0 |
| <i>Stenocercus_cupreus</i>          | 1 | 0 | 0 | 0 |
| <i>Stenocercus_doellojuradoi</i>    | 1 | 0 | 0 | 0 |
| <i>Stenocercus_empetrus</i>         | 1 | 0 | 0 | 0 |
| <i>Stenocercus_eunetopsis</i>       | 1 | 0 | 0 | 0 |
| <i>Stenocercus_festae</i>           | 1 | 0 | 0 | 0 |
| <i>Stenocercus_formosus</i>         | 1 | 0 | 0 | 0 |
| <i>Stenocercus_guentheri</i>        | 1 | 0 | 0 | 0 |
| <i>Stenocercus_humeralis</i>        | 1 | 0 | 0 | 0 |
| <i>Stenocercus_imitator</i>         | 1 | 0 | 0 | 0 |
| <i>Stenocercus_iridescens</i>       | 1 | 0 | 0 | 0 |
| <i>Stenocercus_latebrosus</i>       | 1 | 0 | 0 | 0 |
| <i>Stenocercus_limitaris</i>        | 1 | 0 | 0 | 0 |
| <i>Stenocercus_marmoratus</i>       | 1 | 0 | 0 | 0 |
| <i>Stenocercus_melanopygus</i>      | 1 | 0 | 0 | 0 |

|                                      |   |   |   |   |
|--------------------------------------|---|---|---|---|
| <i>Stenocercus_ochoi</i>             | 1 | 0 | 0 | 0 |
| <i>Stenocercus_orientalis</i>        | 1 | 0 | 0 | 0 |
| <i>Stenocercus_ornatissimus</i>      | 1 | 0 | 0 | 0 |
| <i>Stenocercus_ornatus</i>           | 1 | 0 | 0 | 0 |
| <i>Stenocercus_percultus</i>         | 1 | 0 | 0 | 0 |
| <i>Stenocercus_puyango</i>           | 1 | 0 | 0 | 0 |
| <i>Stenocercus_rhodomelas</i>        | 1 | 0 | 0 | 0 |
| <i>Stenocercus_roseiventris</i>      | 1 | 0 | 0 | 0 |
| <i>Stenocercus_scapularis</i>        | 1 | 0 | 0 | 0 |
| <i>Stenocercus_stigmosus</i>         | 1 | 0 | 0 | 0 |
| <i>Stenocercus_torquatus</i>         | 1 | 0 | 0 | 0 |
| <i>Stenocercus_varius</i>            | 1 | 0 | 0 | 0 |
| <i>Stenodactylus_arabicus</i>        | 1 | 1 | 0 | 0 |
| <i>Stenodactylus_doriae</i>          | 1 | 1 | 0 | 0 |
| <i>Stenodactylus_khobarensis</i>     | 1 | 1 | 0 | 0 |
| <i>Stenodactylus_leptocosymbotes</i> | - | 1 | 0 | 0 |
| <i>Stenodactylus_petrii</i>          | 1 | 1 | 0 | 0 |
| <i>Stenodactylus_sthenodactylus</i>  | 1 | 1 | 0 | 0 |
| <i>Stenodactylus_yemenensis</i>      | 1 | 1 | 0 | 0 |
| <i>Stenolepis_ridleyi</i>            | 1 | 0 | 0 | 0 |
| <i>Stenorrhina_freminvillei</i>      | 1 | 0 | 0 | 0 |
| <i>Stilosoma_extenuatum</i>          | - | 0 | 0 | 0 |
| <i>Stoliczkaia_borneensis</i>        | 1 | 0 | 0 | 0 |
| <i>Storeria_dekayi</i>               | 0 | 0 | 0 | 0 |
| <i>Storeria_occipitomaculata</i>     | 0 | 0 | 0 | 0 |
| <i>Strobilurus_torquatus</i>         | 1 | 0 | 0 | 0 |
| <i>Strophurus_ciliaris</i>           | 1 | 0 | 0 | 0 |
| <i>Strophurus_elderi</i>             | 1 | 0 | 0 | 0 |
| <i>Strophurus_jeanae</i>             | 1 | 0 | 0 | 0 |
| <i>Strophurus_krisalys</i>           | 1 | 0 | 0 | 0 |
| <i>Strophurus_mcmillani</i>          | 1 | 0 | 0 | 0 |
| <i>Strophurus_rankini</i>            | 1 | 0 | 0 | 0 |
| <i>Strophurus_spinigerus</i>         | 1 | 0 | 0 | 0 |
| <i>Strophurus_strophurus</i>         | 1 | 0 | 0 | 0 |
| <i>Strophurus_taeiniatus</i>         | 1 | 0 | 0 | 0 |
| <i>Strophurus_taeinicauda</i>        | 1 | 0 | 0 | 0 |
| <i>Strophurus_wellingtonae</i>       | 1 | 0 | 0 | 0 |
| <i>Strophurus_williamsi</i>          | 1 | 0 | 0 | 0 |
| <i>Suta_fasciata</i>                 | 0 | 0 | 0 | 0 |
| <i>Suta_monachus</i>                 | 0 | 0 | 0 | 0 |
| <i>Suta_spectabilis</i>              | 0 | 0 | 0 | 0 |
| <i>Suta_suta</i>                     | 0 | 0 | 0 | 0 |
| <i>Sympholis_lippiens</i>            | 1 | 0 | 0 | 0 |
| <i>Tachymenis_peruviana</i>          | 0 | 0 | 0 | 0 |

|                                   |   |   |   |   |
|-----------------------------------|---|---|---|---|
| <i>Taeniophallus_affinis</i>      | 1 | 0 | 0 | 0 |
| <i>Taeniophallus_brevirostris</i> | 1 | 0 | 0 | 0 |
| <i>Takydromus_amurensis</i>       | 1 | 0 | 0 | 0 |
| <i>Takydromus_dorsalis</i>        | 1 | 0 | 0 | 0 |
| <i>Takydromus_formosanus</i>      | 1 | 0 | 0 | 0 |
| <i>Takydromus_hsuehshanensis</i>  | 1 | 0 | 0 | 0 |
| <i>Takydromus_intermedius</i>     | 1 | 0 | 0 | 0 |
| <i>Takydromus_kuehnei</i>         | 1 | 0 | 0 | 0 |
| <i>Takydromus_sauteri</i>         | 1 | 0 | 0 | 0 |
| <i>Takydromus_septentrionalis</i> | 1 | 0 | 0 | 0 |
| <i>Takydromus_sexlineatus</i>     | 1 | 0 | 0 | 0 |
| <i>Takydromus_smaragdinus</i>     | 1 | 0 | 0 | 0 |
| <i>Takydromus_stejnegeri</i>      | 1 | 0 | 0 | 0 |
| <i>Takydromus_sylvaticus</i>      | 1 | 0 | 0 | 0 |
| <i>Takydromus_tachydromoides</i>  | 1 | 0 | 0 | 0 |
| <i>Takydromus_toyamai</i>         | 1 | 0 | 0 | 0 |
| <i>Takydromus_wolteri</i>         | 1 | 0 | 0 | 0 |
| <i>Tantalophis_discolor</i>       | 1 | 0 | 0 | 0 |
| <i>Tantilla_melanocephala</i>     | 1 | 0 | 0 | 0 |
| <i>Tarentola_americana</i>        | 1 | 1 | 0 | 0 |
| <i>Tarentola_angustimentalis</i>  | 1 | 1 | 0 | 0 |
| <i>Tarentola_annularis</i>        | 1 | 1 | 0 | 0 |
| <i>Tarentola_boehmei</i>          | 1 | 1 | 0 | 0 |
| <i>Tarentola_boettgeri</i>        | 1 | 1 | 0 | 0 |
| <i>Tarentola_caboverdianus</i>    | 1 | 1 | 0 | 0 |
| <i>Tarentola_darwini</i>          | 1 | 1 | 0 | 0 |
| <i>Tarentola_delalandii</i>       | 1 | 1 | 0 | 0 |
| <i>Tarentola_deserti</i>          | 1 | 1 | 0 | 0 |
| <i>Tarentola_ephippiata</i>       | 1 | 1 | 0 | 0 |
| <i>Tarentola_fascicularis</i>     | - | 1 | 0 | 0 |
| <i>Tarentola_gigas</i>            | 1 | 1 | 0 | 0 |
| <i>Tarentola_gomerensis</i>       | 1 | 1 | 0 | 0 |
| <i>Tarentola_mauritanica</i>      | 1 | 1 | 0 | 0 |
| <i>Tarentola_mindiae</i>          | 1 | 1 | 0 | 0 |
| <i>Tarentola_neglecta</i>         | 1 | 1 | 0 | 0 |
| <i>Tarentola_nicolauensis</i>     | - | 1 | 0 | 0 |
| <i>Tarentola_rudis</i>            | 1 | 1 | 0 | 0 |
| <i>Teius_teyou</i>                | 1 | 0 | 0 | 0 |
| <i>Telescopus_fallax</i>          | 1 | 0 | 0 | 0 |
| <i>Teratoscincus_microlepis</i>   | 1 | 1 | 0 | 0 |
| <i>Teratoscincus_przewalskii</i>  | 1 | 1 | 0 | 0 |
| <i>Teratoscincus_roborowskii</i>  | 1 | 1 | 0 | 0 |
| <i>Teratoscincus_scincus</i>      | 1 | 1 | 0 | 0 |
| <i>Tetracheilostoma_breuili</i>   | - | 0 | 0 | 0 |

|                                    |   |   |   |   |
|------------------------------------|---|---|---|---|
| <i>Tetracheilostoma_carlae</i>     | - | 0 | 0 | 0 |
| <i>Tetradactylus_africanus</i>     | 1 | 0 | 0 | 0 |
| <i>Tetradactylus_seps</i>          | 1 | 0 | 0 | 0 |
| <i>Tetradactylus_tetradactylus</i> | 1 | 0 | 0 | 0 |
| <i>Thamnodynastes_lanei</i>        | 0 | 0 | 0 | 0 |
| <i>Thamnodynastes_pallidus</i>     | 0 | 0 | 0 | 0 |
| <i>Thamnodynastes_rutilus</i>      | 0 | 0 | 0 | 0 |
| <i>Thamnodynastes_strigatus</i>    | 0 | 0 | 0 | 0 |
| <i>Thamnophis_ateratus</i>         | 0 | 0 | 0 | 0 |
| <i>Thamnophis_brachystoma</i>      | 0 | 0 | 0 | 0 |
| <i>Thamnophis_butleri</i>          | 0 | 0 | 0 | 0 |
| <i>Thamnophis_chrysocephalus</i>   | 0 | 0 | 0 | 0 |
| <i>Thamnophis_couchii</i>          | 0 | 0 | 0 | 0 |
| <i>Thamnophis_cyrtopsis</i>        | 0 | 0 | 0 | 0 |
| <i>Thamnophis_elegans</i>          | 0 | 0 | 0 | 0 |
| <i>Thamnophis_eques</i>            | 0 | 0 | 0 | 0 |
| <i>Thamnophis_errans</i>           | - | 0 | 0 | 0 |
| <i>Thamnophis_exsul</i>            | 0 | 0 | 0 | 0 |
| <i>Thamnophis_fulvus</i>           | 0 | 0 | 0 | 0 |
| <i>Thamnophis_gigas</i>            | 0 | 0 | 0 | 0 |
| <i>Thamnophis_godmani</i>          | 0 | 0 | 0 | 0 |
| <i>Thamnophis_hammondii</i>        | 0 | 0 | 0 | 0 |
| <i>Thamnophis_marcianus</i>        | 0 | 0 | 0 | 0 |
| <i>Thamnophis_melanogaster</i>     | 0 | 0 | 0 | 0 |
| <i>Thamnophis_mendax</i>           | 0 | 0 | 0 | 0 |
| <i>Thamnophis_nigronuchalis</i>    | - | 0 | 0 | 0 |
| <i>Thamnophis_ordinoides</i>       | 0 | 0 | 0 | 0 |
| <i>Thamnophis_proximus</i>         | 0 | 0 | 0 | 0 |
| <i>Thamnophis_radix</i>            | 0 | 0 | 0 | 0 |
| <i>Thamnophis_rufipunctatus</i>    | 0 | 0 | 0 | 0 |
| <i>Thamnophis_sauritus</i>         | 0 | 0 | 0 | 0 |
| <i>Thamnophis_scalaris</i>         | 0 | 0 | 0 | 0 |
| <i>Thamnophis_scaliger</i>         | 0 | 0 | 0 | 0 |
| <i>Thamnophis_sirtalis</i>         | 0 | 0 | 0 | 0 |
| <i>Thamnophis_sumichrasti</i>      | 0 | 0 | 0 | 0 |
| <i>Thamnophis_valida</i>           | 0 | 0 | 0 | 0 |
| <i>Thamnosophis_epistibes</i>      | - | 0 | 0 | 0 |
| <i>Thamnosophis_infrassignatus</i> | - | 0 | 0 | 0 |
| <i>Thamnosophis_lateralis</i>      | - | 0 | 0 | 0 |
| <i>Thamnosophis_martae</i>         | - | 0 | 0 | 0 |
| <i>Thamnosophis_stumpffi</i>       | - | 0 | 0 | 0 |
| <i>Thecadactylus_rapicauda</i>     | 1 | 1 | 0 | 0 |
| <i>Thecadactylus_solimoensis</i>   | 1 | 1 | 0 | 0 |
| <i>Thelotornis_capensis</i>        | 1 | 0 | 0 | 0 |

|                                         |   |   |   |   |
|-----------------------------------------|---|---|---|---|
| <i>Thermophis_baileyi</i>               | - | 0 | 0 | 0 |
| <i>Thermophis_zhaoermii</i>             | - | 0 | 0 | 0 |
| <i>Thrasops_jacksoni</i>                | - | 0 | 0 | 0 |
| <i>Tiliqua_adelaidensis</i>             | 0 | 0 | 0 | 0 |
| <i>Tiliqua_gigas</i>                    | 0 | 0 | 0 | 0 |
| <i>Tiliqua_nigrolutea</i>               | 0 | 0 | 0 | 0 |
| <i>Tiliqua_occipitalis</i>              | 0 | 0 | 0 | 0 |
| <i>Tiliqua_rugosa</i>                   | 0 | 0 | 0 | 0 |
| <i>Tiliqua_scincoides</i>               | 0 | 0 | 0 | 0 |
| <i>Timon_lepidus</i>                    | 1 | 0 | 0 | 0 |
| <i>Timon_pater</i>                      | 1 | 0 | 0 | 0 |
| <i>Timon_princeps</i>                   | 1 | 0 | 0 | 0 |
| <i>Timon_tangitanus</i>                 | 1 | 0 | 0 | 0 |
| <i>Tomodon_dorsatus</i>                 | 0 | 0 | 0 | 0 |
| <i>Toxicocalamus_loriae</i>             | 1 | 0 | 0 | 0 |
| <i>Toxicocalamus_preussi</i>            | 1 | 0 | 0 | 0 |
| <i>Toxicodryas_pulverulenta</i>         | - | 0 | 0 | 0 |
| <i>Tracheloptychus_madagascariensis</i> | 1 | 0 | 0 | 0 |
| <i>Tracheloptychus_petersi</i>          | 1 | 0 | 0 | 0 |
| <i>Trachischium_monticola</i>           | 1 | 0 | 0 | 0 |
| <i>Trachyboa_boulengeri</i>             | 0 | 0 | 0 | 0 |
| <i>Trachyboa_gularis</i>                | 0 | 0 | 0 | 0 |
| <i>Trachylepis_acutilabris</i>          | - | 0 | 0 | 0 |
| <i>Trachylepis_affinis</i>              | - | 0 | 0 | 0 |
| <i>Trachylepis_atlantica</i>            | - | 0 | 0 | 0 |
| <i>Trachylepis_aurata</i>               | 0 | 0 | 0 | 0 |
| <i>Trachylepis_aureopunctata</i>        | 1 | 0 | 0 | 0 |
| <i>Trachylepis_boettgeri</i>            | - | 0 | 0 | 0 |
| <i>Trachylepis_brevicollis</i>          | 0 | 0 | 0 | 0 |
| <i>Trachylepis_capensis</i>             | - | 0 | 0 | 0 |
| <i>Trachylepis_cristinae</i>            | - | 0 | 0 | 0 |
| <i>Trachylepis_dumasi</i>               | - | 0 | 0 | 0 |
| <i>Trachylepis_elegans</i>              | - | 0 | 0 | 0 |
| <i>Trachylepis_gravenhorstii</i>        | 1 | 0 | 0 | 0 |
| <i>Trachylepis_hoeschi</i>              | - | 0 | 0 | 0 |
| <i>Trachylepis_homalocephala</i>        | - | 0 | 0 | 0 |
| <i>Trachylepis_maculilabris</i>         | 1 | 0 | 0 | 0 |
| <i>Trachylepis_madagascariensis</i>     | 1 | 0 | 0 | 0 |
| <i>Trachylepis_margaritifera</i>        | - | 0 | 0 | 0 |
| <i>Trachylepis_occidentalis</i>         | 1 | 0 | 0 | 0 |
| <i>Trachylepis_perrotetii</i>           | 1 | 0 | 0 | 0 |
| <i>Trachylepis_quinquetaeniata</i>      | 1 | 0 | 0 | 0 |
| <i>Trachylepis_seychellensis</i>        | 1 | 0 | 0 | 0 |
| <i>Trachylepis_socotrana</i>            | - | 0 | 0 | 0 |

|                                        |   |   |   |   |
|----------------------------------------|---|---|---|---|
| <i>Trachylepis_spilogaster</i>         | 0 | 0 | 0 | 0 |
| <i>Trachylepis_striata</i>             | 0 | 0 | 0 | 0 |
| <i>Trachylepis_sulcata</i>             | - | 0 | 0 | 0 |
| <i>Trachylepis_varia</i>               | 0 | 0 | 0 | 0 |
| <i>Trachylepis_variegata</i>           | 0 | 0 | 0 | 0 |
| <i>Trachylepis_vato</i>                | - | 0 | 0 | 0 |
| <i>Trachylepis_vittata</i>             | 0 | 0 | 0 | 0 |
| <i>Trachylepis_wrightii</i>            | - | 0 | 0 | 0 |
| <i>Trapelus_agilis</i>                 | 1 | 0 | 0 | 0 |
| <i>Trapelus_cf_agilis</i>              | - | 0 | 0 | 0 |
| <i>Trapelus_flavimaculatus</i>         | 1 | 0 | 0 | 0 |
| <i>Trapelus_mutabilis</i>              | 1 | 0 | 0 | 0 |
| <i>Trapelus_pallidus</i>               | 1 | 0 | 0 | 0 |
| <i>Trapelus_ruderatus</i>              | 1 | 0 | 0 | 0 |
| <i>Trapelus_sanguinolentus</i>         | 1 | 0 | 0 | 0 |
| <i>Trapelus_savignii</i>               | 1 | 0 | 0 | 0 |
| <i>Tretanorhinus_nigroluteus</i>       | 1 | 0 | 0 | 0 |
| <i>Tretanorhinus_variabilis</i>        | 1 | 0 | 0 | 0 |
| <i>Tretioscincus_agilis</i>            | 1 | 0 | 0 | 0 |
| <i>Tretioscincus_oriximinensis</i>     | 1 | 0 | 0 | 0 |
| <i>Tribolonotus_blanchardi</i>         | 1 | 0 | 0 | 0 |
| <i>Tribolonotus_brongersmai</i>        | 1 | 0 | 0 | 0 |
| <i>Tribolonotus_gracilis</i>           | 1 | 0 | 0 | 0 |
| <i>Tribolonotus_novaeguineae</i>       | 1 | 0 | 0 | 0 |
| <i>Tribolonotus_ponceleti</i>          | 1 | 0 | 0 | 0 |
| <i>Tribolonotus_pseudoponceleti</i>    | 1 | 0 | 0 | 0 |
| <i>Tribolonotus_schmidti</i>           | 0 | 0 | 0 | 0 |
| <i>Triceratolepidophis_sieversorum</i> | 1 | 0 | 0 | 0 |
| <i>Tricheilostoma_macrolepis</i>       | - | 0 | 0 | 0 |
| <i>Trimeresurus_albolabris</i>         | - | 0 | 0 | 0 |
| <i>Trimeresurus_borneensis</i>         | 1 | 0 | 0 | 0 |
| <i>Trimeresurus_flavomaculatus</i>     | - | 0 | 0 | 0 |
| <i>Trimeresurus_flavoviridis</i>       | - | 0 | 0 | 0 |
| <i>Trimeresurus_gracilis</i>           | 0 | 0 | 0 | 0 |
| <i>Trimeresurus_gramineus</i>          | 0 | 0 | 0 | 0 |
| <i>Trimeresurus_insularis</i>          | - | 0 | 0 | 0 |
| <i>Trimeresurus_malabaricus</i>        | 0 | 0 | 0 | 0 |
| <i>Trimeresurus_popeiorum</i>          | - | 0 | 0 | 0 |
| <i>Trimeresurus_puniceus</i>           | 0 | 0 | 0 | 0 |
| <i>Trimeresurus_septentrionalis</i>    | - | 0 | 0 | 0 |
| <i>Trimeresurus_tokarensis</i>         | - | 0 | 0 | 0 |
| <i>Trimeresurus_trigonocephalus</i>    | 0 | 0 | 0 | 0 |
| <i>Trimetopon_gracile</i>              | 1 | 0 | 0 | 0 |
| <i>Trimorphodon_biscutatus</i>         | 1 | 0 | 0 | 0 |



|                                    |   |   |   |   |
|------------------------------------|---|---|---|---|
| <i>Trioceros_affinis</i>           | - | 0 | 0 | 0 |
| <i>Trioceros_balebicornutus</i>    | - | 0 | 0 | 0 |
| <i>Trioceros_bitaeniatus</i>       | - | 0 | 0 | 0 |
| <i>Trioceros_cristatus</i>         | - | 0 | 0 | 0 |
| <i>Trioceros_deremensis</i>        | - | 0 | 0 | 0 |
| <i>Trioceros_elliotti</i>          | - | 0 | 0 | 0 |
| <i>Trioceros_feae</i>              | - | 0 | 0 | 0 |
| <i>Trioceros_fuelleborni</i>       | - | 0 | 0 | 0 |
| <i>Trioceros_goetzei</i>           | - | 0 | 0 | 0 |
| <i>Trioceros_harennae</i>          | - | 0 | 0 | 0 |
| <i>Trioceros_hoehnelii</i>         | - | 0 | 0 | 0 |
| <i>Trioceros_jacksonii</i>         | - | 0 | 0 | 0 |
| <i>Trioceros_johnstoni</i>         | - | 0 | 0 | 0 |
| <i>Trioceros_melleri</i>           | - | 0 | 0 | 0 |
| <i>Trioceros_montium</i>           | - | 0 | 0 | 0 |
| <i>Trioceros_narraioca</i>         | - | 0 | 0 | 0 |
| <i>Trioceros_oweni</i>             | - | 0 | 0 | 0 |
| <i>Trioceros_pfefferi</i>          | - | 0 | 0 | 0 |
| <i>Trioceros_quadricornis</i>      | - | 0 | 0 | 0 |
| <i>Trioceros_quilensis</i>         | - | 0 | 0 | 0 |
| <i>Trioceros_rudis</i>             | - | 0 | 0 | 0 |
| <i>Trioceros_schubotzi</i>         | - | 0 | 0 | 0 |
| <i>Trioceros_sternfeldi</i>        | - | 0 | 0 | 0 |
| <i>Trioceros_tempeli</i>           | - | 0 | 0 | 0 |
| <i>Trioceros_weneri</i>            | - | 0 | 0 | 0 |
| <i>Trioceros_wiedersheimi</i>      | - | 0 | 0 | 0 |
| <i>Trogonophis_wiegmanni</i>       | 0 | 0 | 0 | 0 |
| <i>Tropidechis_carinatus</i>       | 0 | 0 | 0 | 0 |
| <i>Tropidoclonion_lineatum</i>     | 0 | 0 | 0 | 0 |
| <i>Tropidodryas_serra</i>          | 1 | 0 | 0 | 0 |
| <i>Tropidodryas_striaticeps</i>    | 1 | 0 | 0 | 0 |
| <i>Tropidolaemus_wagleri</i>       | 0 | 0 | 0 | 0 |
| <i>Tropidophis_feicki</i>          | 0 | 0 | 0 | 0 |
| <i>Tropidophis_greenwayi</i>       | 0 | 0 | 0 | 0 |
| <i>Tropidophis_haetianus</i>       | 0 | 0 | 0 | 0 |
| <i>Tropidophis_melanurus</i>       | 0 | 0 | 0 | 0 |
| <i>Tropidophis_pardalis</i>        | 0 | 0 | 0 | 0 |
| <i>Tropidophis_wrighti</i>         | 0 | 0 | 0 | 0 |
| <i>Tropidophorus_baconi</i>        | 0 | 0 | 0 | 0 |
| <i>Tropidophorus_baviensis</i>     | 0 | 0 | 0 | 0 |
| <i>Tropidophorus_beccarii</i>      | 0 | 0 | 0 | 0 |
| <i>Tropidophorus_berdmorei</i>     | 0 | 0 | 0 | 0 |
| <i>Tropidophorus_brookei</i>       | 0 | 0 | 0 | 0 |
| <i>Tropidophorus_cocincinensis</i> | 0 | 0 | 0 | 0 |

|                                      |   |   |   |   |
|--------------------------------------|---|---|---|---|
| <i>Tropidophorus_grayi</i>           | 0 | 0 | 0 | 0 |
| <i>Tropidophorus_hainanus</i>        | 0 | 0 | 0 | 0 |
| <i>Tropidophorus_latiscutatus</i>    | 0 | 0 | 0 | 0 |
| <i>Tropidophorus_matsuii</i>         | 0 | 0 | 0 | 0 |
| <i>Tropidophorus_microlepis</i>      | 0 | 0 | 0 | 0 |
| <i>Tropidophorus_misaminius</i>      | 0 | 0 | 0 | 0 |
| <i>Tropidophorus_murphyi</i>         | 0 | 0 | 0 | 0 |
| <i>Tropidophorus_noggei</i>          | 0 | 0 | 0 | 0 |
| <i>Tropidophorus_partelloi</i>       | 0 | 0 | 0 | 0 |
| <i>Tropidophorus_robinsoni</i>       | 0 | 0 | 0 | 0 |
| <i>Tropidophorus_sinicus</i>         | 0 | 0 | 0 | 0 |
| <i>Tropidophorus_thai</i>            | 0 | 0 | 0 | 0 |
| <i>Tropidosaura_gularis</i>          | 1 | 0 | 0 | 0 |
| <i>Tropidoscincus_aubrianus</i>      | - | 0 | 0 | 0 |
| <i>Tropidoscincus_boreus</i>         | - | 0 | 0 | 0 |
| <i>Tropidoscincus_variabilis</i>     | - | 0 | 0 | 0 |
| <i>Tropidurus_bogerti</i>            | 1 | 0 | 0 | 0 |
| <i>Tropidurus_callathelys</i>        | 1 | 0 | 0 | 0 |
| <i>Tropidurus_cocorobensis</i>       | 1 | 0 | 0 | 0 |
| <i>Tropidurus_erythrocephalus</i>    | 1 | 0 | 0 | 0 |
| <i>Tropidurus_etheridgei</i>         | 1 | 0 | 0 | 0 |
| <i>Tropidurus_hispidus</i>           | 1 | 0 | 0 | 0 |
| <i>Tropidurus_hygomi</i>             | 1 | 0 | 0 | 0 |
| <i>Tropidurus_insulanus</i>          | 1 | 0 | 0 | 0 |
| <i>Tropidurus_itambere</i>           | 1 | 0 | 0 | 0 |
| <i>Tropidurus_montanus</i>           | 1 | 0 | 0 | 0 |
| <i>Tropidurus_mucujensis</i>         | 1 | 0 | 0 | 0 |
| <i>Tropidurus_oreadicus</i>          | 1 | 0 | 0 | 0 |
| <i>Tropidurus_psammonastes</i>       | 1 | 0 | 0 | 0 |
| <i>Tropidurus_spinulosus</i>         | 1 | 0 | 0 | 0 |
| <i>Tropidurus_torquatus</i>          | 1 | 0 | 0 | 0 |
| <i>Tropicolotes_helenae</i>          | 1 | 1 | 0 | 0 |
| <i>Tropicolotes_tripolitanus</i>     | 1 | 1 | 0 | 0 |
| <i>Tupinambis_duseni</i>             | 1 | 0 | 0 | 0 |
| <i>Tupinambis_longilineus</i>        | 1 | 0 | 0 | 0 |
| <i>Tupinambis_merianae</i>           | 1 | 0 | 0 | 0 |
| <i>Tupinambis_quadrilineatus</i>     | 1 | 0 | 0 | 0 |
| <i>Tupinambis_rufescens</i>          | 1 | 0 | 0 | 0 |
| <i>Tupinambis_teguixin</i>           | 1 | 0 | 0 | 0 |
| <i>Tympanocryptis_cephalus</i>       | 1 | 0 | 0 | 0 |
| <i>Tympanocryptis_intima</i>         | 1 | 0 | 0 | 0 |
| <i>Tympanocryptis_lineata</i>        | 1 | 0 | 0 | 0 |
| <i>Tympanocryptis_pinguicolla</i>    | 1 | 0 | 0 | 0 |
| <i>Tympanocryptis_tetraporophora</i> | 1 | 0 | 0 | 0 |

|                                     |   |   |   |   |
|-------------------------------------|---|---|---|---|
| <i>Tympanocryptis_uniformis</i>     | 1 | 0 | 0 | 0 |
| <i>Typhlacontias_brevipes</i>       | 0 | 0 | 0 | 0 |
| <i>Typhlacontias_punctatissimus</i> | 0 | 0 | 0 | 0 |
| <i>Typhlophis_squamosus</i>         | 1 | 0 | 0 | 0 |
| <i>Typhlops_agoralionis</i>         | 1 | 0 | 0 | 0 |
| <i>Typhlops_anchaurus</i>           | 1 | 0 | 0 | 0 |
| <i>Typhlops_andasibensis</i>        | - | 0 | 0 | 0 |
| <i>Typhlops_anousius</i>            | 1 | 0 | 0 | 0 |
| <i>Typhlops_arator</i>              | 1 | 0 | 0 | 0 |
| <i>Typhlops_arenarius</i>           | 1 | 0 | 0 | 0 |
| <i>Typhlops_biminiensis</i>         | 1 | 0 | 0 | 0 |
| <i>Typhlops_brongersmianus</i>      | 1 | 0 | 0 | 0 |
| <i>Typhlops_capitulatus</i>         | 1 | 0 | 0 | 0 |
| <i>Typhlops_catapontus</i>          | 1 | 0 | 0 | 0 |
| <i>Typhlops_caymanensis</i>         | 1 | 0 | 0 | 0 |
| <i>Typhlops_contorhinus</i>         | 1 | 0 | 0 | 0 |
| <i>Typhlops_dominicanus</i>         | 1 | 0 | 0 | 0 |
| <i>Typhlops_elegans</i>             | 1 | 0 | 0 | 0 |
| <i>Typhlops_eperopeus</i>           | 1 | 0 | 0 | 0 |
| <i>Typhlops_geotomus</i>            | - | 0 | 0 | 0 |
| <i>Typhlops_granti</i>              | 1 | 0 | 0 | 0 |
| <i>Typhlops_hectus</i>              | 1 | 0 | 0 | 0 |
| <i>Typhlops_hedraeus</i>            | 1 | 0 | 0 | 0 |
| <i>Typhlops_hypomethes</i>          | 1 | 0 | 0 | 0 |
| <i>Typhlops_jamaicensis</i>         | 1 | 0 | 0 | 0 |
| <i>Typhlops_lumbricalis</i>         | 1 | 0 | 0 | 0 |
| <i>Typhlops_luzonensis</i>          | 1 | 0 | 0 | 0 |
| <i>Typhlops_mirus</i>               | 1 | 0 | 0 | 0 |
| <i>Typhlops_monastus</i>            | 1 | 0 | 0 | 0 |
| <i>Typhlops_naugus</i>              | - | 0 | 0 | 0 |
| <i>Typhlops_notorachius</i>         | 1 | 0 | 0 | 0 |
| <i>Typhlops_pammeces</i>            | 1 | 0 | 0 | 0 |
| <i>Typhlops_platycephalus</i>       | 1 | 0 | 0 | 0 |
| <i>Typhlops_pusillus</i>            | 1 | 0 | 0 | 0 |
| <i>Typhlops_reticulatus</i>         | 1 | 0 | 0 | 0 |
| <i>Typhlops_richardi</i>            | 1 | 0 | 0 | 0 |
| <i>Typhlops_rostellatus</i>         | 1 | 0 | 0 | 0 |
| <i>Typhlops_ruber</i>               | 1 | 0 | 0 | 0 |
| <i>Typhlops_schwartzi</i>           | 1 | 0 | 0 | 0 |
| <i>Typhlops_sp._FGMV2002.2033</i>   | - | 0 | 0 | 0 |
| <i>Typhlops_sp._UTEP_EBG1191</i>    | - | 0 | 0 | 0 |
| <i>Typhlops_sulcatus</i>            | 1 | 0 | 0 | 0 |
| <i>Typhlops_sylleptor</i>           | 1 | 0 | 0 | 0 |
| <i>Typhlops_syntherus</i>           | 1 | 0 | 0 | 0 |

|                                  |   |   |   |   |
|----------------------------------|---|---|---|---|
| <i>Typhlops_titanops</i>         | 1 | 0 | 0 | 0 |
| <i>Typhlops_vermicularis</i>     | 1 | 0 | 0 | 0 |
| <i>Typhlosaurus_braini</i>       | 0 | 0 | 0 | 0 |
| <i>Typhlosaurus_caecus</i>       | 0 | 0 | 0 | 0 |
| <i>Typhlosaurus_lomiaae</i>      | 0 | 0 | 0 | 0 |
| <i>Typhlosaurus_meyeri</i>       | 0 | 0 | 0 | 0 |
| <i>Typhlosaurus_vermis</i>       | 0 | 0 | 0 | 0 |
| <i>Uma_exsul</i>                 | 1 | 0 | 0 | 0 |
| <i>Uma_inornata</i>              | 1 | 0 | 0 | 0 |
| <i>Uma_notata</i>                | 1 | 0 | 0 | 0 |
| <i>Uma_paraphygas</i>            | 1 | 0 | 0 | 0 |
| <i>Uma_scoparia</i>              | 1 | 0 | 0 | 0 |
| <i>Umbrivaga_pygmaea</i>         | 1 | 0 | 0 | 0 |
| <i>Underwoodisaurus_milii</i>    | 1 | 0 | 0 | 0 |
| <i>Ungaliophis_continentalis</i> | 0 | 0 | 0 | 0 |
| <i>Uracentron_flaviceps</i>      | 1 | 0 | 0 | 0 |
| <i>Uranoscodon_superciliosus</i> | 1 | 0 | 0 | 0 |
| <i>Urocotyledon_inexpectata</i>  | 1 | 1 | 0 | 0 |
| <i>Uromacer_catesbyi</i>         | 1 | 0 | 0 | 0 |
| <i>Uromacer_frenatus</i>         | 1 | 0 | 0 | 0 |
| <i>Uromacer_oxyrhynchus</i>      | 1 | 0 | 0 | 0 |
| <i>Uromastyx_acanthinura</i>     | 1 | 0 | 0 | 0 |
| <i>Uromastyx_aegyptia</i>        | 1 | 0 | 0 | 0 |
| <i>Uromastyx_benti</i>           | 1 | 0 | 0 | 0 |
| <i>Uromastyx_dispar</i>          | 1 | 0 | 0 | 0 |
| <i>Uromastyx_geyri</i>           | 1 | 0 | 0 | 0 |
| <i>Uromastyx_leptieni</i>        | 1 | 0 | 0 | 0 |
| <i>Uromastyx_macfadyeni</i>      | 1 | 0 | 0 | 0 |
| <i>Uromastyx_ocellata</i>        | 1 | 0 | 0 | 0 |
| <i>Uromastyx_ornata</i>          | 1 | 0 | 0 | 0 |
| <i>Uromastyx_princeps</i>        | 1 | 0 | 0 | 0 |
| <i>Uromastyx_thomasi</i>         | 1 | 0 | 0 | 0 |
| <i>Uromastyx_yemenensis</i>      | 1 | 0 | 0 | 0 |
| <i>Uropeltis_ceylanica</i>       | - | 0 | 0 | 0 |
| <i>Uropeltis_liura</i>           | 0 | 0 | 0 | 0 |
| <i>Uropeltis_melanogaster</i>    | 0 | 0 | 0 | 0 |
| <i>Uropeltis_phillipsi</i>       | 0 | 0 | 0 | 0 |
| <i>Uroplatus_alluaudi</i>        | 1 | 1 | 0 | 0 |
| <i>Uroplatus_ebenau</i>          | 1 | 1 | 0 | 0 |
| <i>Uroplatus_fimbriatus</i>      | 1 | 1 | 0 | 0 |
| <i>Uroplatus_giganteus</i>       | 1 | 1 | 0 | 0 |
| <i>Uroplatus_guentheri</i>       | 1 | 1 | 0 | 0 |
| <i>Uroplatus_henkeli</i>         | 1 | 1 | 0 | 0 |
| <i>Uroplatus_lineatus</i>        | 1 | 1 | 0 | 0 |

|                               |   |   |   |   |
|-------------------------------|---|---|---|---|
| <i>Uroplatus_malahelo</i>     | 1 | 1 | 0 | 0 |
| <i>Uroplatus_malama</i>       | 1 | 1 | 0 | 0 |
| <i>Uroplatus_phantasticus</i> | 1 | 1 | 0 | 0 |
| <i>Uroplatus_pietschmanni</i> | 1 | 1 | 0 | 0 |
| <i>Uroplatus_sikorae</i>      | 1 | 1 | 0 | 0 |
| <i>Urosaurus_auriculatus</i>  | 1 | 0 | 0 | 0 |
| <i>Urosaurus_bicarinatus</i>  | 1 | 0 | 0 | 0 |
| <i>Urosaurus_clarionensis</i> | 1 | 0 | 0 | 0 |
| <i>Urosaurus_gadovi</i>       | 1 | 0 | 0 | 0 |
| <i>Urosaurus_graciosus</i>    | 1 | 0 | 0 | 0 |
| <i>Urosaurus_lahtelai</i>     | 1 | 0 | 0 | 0 |
| <i>Urosaurus_nigricaudus</i>  | 1 | 0 | 0 | 0 |
| <i>Urosaurus_ornatus</i>      | 1 | 0 | 0 | 0 |
| <i>Urostrophus_gallardoii</i> | 1 | 0 | 0 | 0 |
| <i>Urostrophus_vautieri</i>   | 1 | 0 | 0 | 0 |
| <i>Uta_palmeri</i>            | 1 | 0 | 0 | 0 |
| <i>Uta_squamata</i>           | 1 | 0 | 0 | 0 |
| <i>Uta_stansburiana</i>       | 1 | 0 | 0 | 0 |
| <i>Uta_stejnegeri</i>         | 1 | 0 | 0 | 0 |
| <i>Uvidicolus_sphyrurus</i>   | - | 0 | 0 | 0 |
| <i>Vanzosaura_rubricauda</i>  | 1 | 0 | 0 | 0 |
| <i>Varanus_acanthurus</i>     | 1 | 0 | 0 | 0 |
| <i>Varanus_albigularis</i>    | 1 | 0 | 0 | 0 |
| <i>Varanus_baritji</i>        | 1 | 0 | 0 | 0 |
| <i>Varanus_beccarii</i>       | 1 | 0 | 0 | 0 |
| <i>Varanus_bengalensis</i>    | 1 | 0 | 0 | 0 |
| <i>Varanus_boehmei</i>        | 1 | 0 | 0 | 0 |
| <i>Varanus_brevicauda</i>     | 1 | 0 | 0 | 0 |
| <i>Varanus_bushi</i>          | 1 | 0 | 0 | 0 |
| <i>Varanus_caerulivirens</i>  | 1 | 0 | 0 | 0 |
| <i>Varanus_caudolineatus</i>  | 1 | 0 | 0 | 0 |
| <i>Varanus_cerambonensis</i>  | 1 | 0 | 0 | 0 |
| <i>Varanus_doreanus</i>       | 1 | 0 | 0 | 0 |
| <i>Varanus_dumerilii</i>      | 1 | 0 | 0 | 0 |
| <i>Varanus_erechthi</i>       | 1 | 0 | 0 | 0 |
| <i>Varanus_exanthematicus</i> | 1 | 0 | 0 | 0 |
| <i>Varanus_finschi</i>        | 1 | 0 | 0 | 0 |
| <i>Varanus_flavescens</i>     | 1 | 0 | 0 | 0 |
| <i>Varanus_giganteus</i>      | 1 | 0 | 0 | 0 |
| <i>Varanus_gilleni</i>        | 1 | 0 | 0 | 0 |
| <i>Varanus_glauerti</i>       | 1 | 0 | 0 | 0 |
| <i>Varanus_glebopalma</i>     | 1 | 0 | 0 | 0 |
| <i>Varanus_gouldii</i>        | 1 | 0 | 0 | 0 |
| <i>Varanus_griseus</i>        | 1 | 0 | 0 | 0 |

|                                |   |   |   |   |
|--------------------------------|---|---|---|---|
| <i>Varanus_indicus</i>         | 1 | 0 | 0 | 0 |
| <i>Varanus_jobiensis</i>       | 1 | 0 | 0 | 0 |
| <i>Varanus_keithhornei</i>     | 1 | 0 | 0 | 0 |
| <i>Varanus_kingorum</i>        | 1 | 0 | 0 | 0 |
| <i>Varanus_komodoensis</i>     | 1 | 0 | 0 | 0 |
| <i>Varanus_macraei</i>         | 1 | 0 | 0 | 0 |
| <i>Varanus_marmoratus</i>      | 1 | 0 | 0 | 0 |
| <i>Varanus_melinus</i>         | 1 | 0 | 0 | 0 |
| <i>Varanus_mertensi</i>        | 1 | 0 | 0 | 0 |
| <i>Varanus_mitchelli</i>       | 1 | 0 | 0 | 0 |
| <i>Varanus_niloticus</i>       | 1 | 0 | 0 | 0 |
| <i>Varanus_olivaceus</i>       | 1 | 0 | 0 | 0 |
| <i>Varanus_panoptes</i>        | 1 | 0 | 0 | 0 |
| <i>Varanus_pilbarensis</i>     | 1 | 0 | 0 | 0 |
| <i>Varanus_prasinus</i>        | 1 | 0 | 0 | 0 |
| <i>Varanus_primordius</i>      | 1 | 0 | 0 | 0 |
| <i>Varanus_rainerguentheri</i> | 1 | 0 | 0 | 0 |
| <i>Varanus_rosenbergi</i>      | 1 | 0 | 0 | 0 |
| <i>Varanus_rudicollis</i>      | 1 | 0 | 0 | 0 |
| <i>Varanus_salvadorii</i>      | 1 | 0 | 0 | 0 |
| <i>Varanus_salvator</i>        | 1 | 0 | 0 | 0 |
| <i>Varanus_scalaris</i>        | 1 | 0 | 0 | 0 |
| <i>Varanus_semiremex</i>       | 1 | 0 | 0 | 0 |
| <i>Varanus_spenceri</i>        | 1 | 0 | 0 | 0 |
| <i>Varanus_storri</i>          | 1 | 0 | 0 | 0 |
| <i>Varanus_timorensis</i>      | 1 | 0 | 0 | 0 |
| <i>Varanus_tristis</i>         | 1 | 0 | 0 | 0 |
| <i>Varanus_varius</i>          | 1 | 0 | 0 | 0 |
| <i>Varanus_yemenensis</i>      | 1 | 0 | 0 | 0 |
| <i>Varanus_yuwonoi</i>         | 1 | 0 | 0 | 0 |
| <i>Varzea_altamazonica</i>     | - | 0 | 0 | 0 |
| <i>Varzea_bistriata</i>        | - | 0 | 0 | 0 |
| <i>Vermicella_intermedia</i>   | 1 | 0 | 0 | 0 |
| <i>Vipera_ammodytes</i>        | 0 | 0 | 0 | 0 |
| <i>Vipera_aspis</i>            | 0 | 0 | 0 | 0 |
| <i>Vipera_barani</i>           | 0 | 0 | 0 | 0 |
| <i>Vipera_berus</i>            | 0 | 0 | 0 | 0 |
| <i>Vipera_dinniki</i>          | 0 | 0 | 0 | 0 |
| <i>Vipera_eriwanensis</i>      | 0 | 0 | 0 | 0 |
| <i>Vipera_kaznakovi</i>        | 0 | 0 | 0 | 0 |
| <i>Vipera_latastei</i>         | 0 | 0 | 0 | 0 |
| <i>Vipera_lotievi</i>          | 0 | 0 | 0 | 0 |
| <i>Vipera_nikolskii</i>        | 0 | 0 | 0 | 0 |
| <i>Vipera_renardi</i>          | 0 | 0 | 0 | 0 |

|                                      |   |   |   |   |
|--------------------------------------|---|---|---|---|
| <i>Vipera_seoanei</i>                | 0 | 0 | 0 | 0 |
| <i>Vipera_ursinii</i>                | 0 | 0 | 0 | 0 |
| <i>Virginia_striatula</i>            | 0 | 0 | 0 | 0 |
| <i>Viridovipera_gumprechti</i>       | 0 | 0 | 0 | 0 |
| <i>Viridovipera_medoensis</i>        | 0 | 0 | 0 | 0 |
| <i>Viridovipera_stejnegeri</i>       | 0 | 0 | 0 | 0 |
| <i>Viridovipera_vogeli</i>           | 0 | 0 | 0 | 0 |
| <i>Viridovipera_yunnanensis</i>      | 0 | 0 | 0 | 0 |
| <i>Voeltzkowia_fierinensis</i>       | - | 0 | 0 | 0 |
| <i>Voeltzkowia_lineata</i>           | - | 0 | 0 | 0 |
| <i>Voeltzkowia_rubrocaudata</i>      | - | 0 | 0 | 0 |
| <i>Walterinnesia_aegyptia</i>        | 1 | 0 | 0 | 0 |
| <i>Wetmorena_haetiana</i>            | - | 0 | 0 | 0 |
| <i>Woodworthia_maculatus</i>         | - | 0 | 0 | 0 |
| <i>Xantusia_arizonae</i>             | 0 | 0 | 0 | 0 |
| <i>Xantusia_bezyi</i>                | 0 | 0 | 0 | 0 |
| <i>Xantusia_bolsonae</i>             | 0 | 0 | 0 | 0 |
| <i>Xantusia_gracilis</i>             | 0 | 0 | 0 | 0 |
| <i>Xantusia_henshawi</i>             | 0 | 0 | 0 | 0 |
| <i>Xantusia_riversiana</i>           | 0 | 0 | 0 | 0 |
| <i>Xantusia_sanchezi</i>             | 0 | 0 | 0 | 0 |
| <i>Xantusia_vigilis</i>              | 0 | 0 | 0 | 0 |
| <i>Xantusia_wigginsi</i>             | 0 | 0 | 0 | 0 |
| <i>Xenagama_taylori</i>              | 1 | 0 | 0 | 0 |
| <i>Xenocalamus_transvaalensis</i>    | 1 | 0 | 0 | 0 |
| <i>Xenochrophis_asperrimus</i>       | 1 | 0 | 0 | 0 |
| <i>Xenochrophis_flavipunctatus</i>   | 1 | 0 | 0 | 0 |
| <i>Xenochrophis_piscator</i>         | 1 | 0 | 0 | 0 |
| <i>Xenochrophis_punctulatus</i>      | 1 | 0 | 0 | 0 |
| <i>Xenochrophis_schnurrenbergeri</i> | - | 0 | 0 | 0 |
| <i>Xenochrophis_yittatus</i>         | 1 | 0 | 0 | 0 |
| <i>Xenodermus_javanicus</i>          | 1 | 0 | 0 | 0 |
| <i>Xenodon_histricus</i>             | - | 0 | 0 | 0 |
| <i>Xenodon_merremi</i>               | - | 0 | 0 | 0 |
| <i>Xenodon_neuwiedi</i>              | - | 0 | 0 | 0 |
| <i>Xenodon_severus</i>               | 1 | 0 | 0 | 0 |
| <i>Xenodon_weneri</i>                | 1 | 0 | 0 | 0 |
| <i>Xenopeltis_unicolor</i>           | 1 | 0 | 0 | 0 |
| <i>Xenophidion_schaeferi</i>         | 1 | 0 | 0 | 0 |
| <i>Xenopholis_scalaris</i>           | 1 | 0 | 0 | 0 |
| <i>Xenosaurus_grandis</i>            | 0 | 0 | 0 | 0 |
| <i>Xenosaurus_platyceps</i>          | 0 | 0 | 0 | 0 |
| <i>Xenotyphlops_grandidieri</i>      | 1 | 0 | 0 | 0 |
| <i>Xenotyphlops_sp._NNV-2010a</i>    | - | 0 | 0 | 0 |

|                                    |   |   |   |   |
|------------------------------------|---|---|---|---|
| <i>Xenoxybelis_argenteus</i>       | 1 | 0 | 0 | 0 |
| <i>Xenoxybelis_boulengeri</i>      | 1 | 0 | 0 | 0 |
| <i>Zamenis_hohenackeri</i>         | 1 | 0 | 0 | 0 |
| <i>Zamenis_lineatus</i>            | - | 0 | 0 | 0 |
| <i>Zamenis_longissimus</i>         | 1 | 0 | 0 | 0 |
| <i>Zamenis_persicus</i>            | - | 0 | 0 | 0 |
| <i>Zamenis_situla</i>              | 1 | 0 | 0 | 0 |
| <i>Zhaoermia_mangshanensis</i>     | 1 | 0 | 0 | 0 |
| <i>Zonosaurus_aeneus</i>           | 1 | 0 | 0 | 0 |
| <i>Zonosaurus_anelanelany</i>      | 1 | 0 | 0 | 0 |
| <i>Zonosaurus_bemaraha</i>         | 1 | 0 | 0 | 0 |
| <i>Zonosaurus_boettgeri</i>        | 1 | 0 | 0 | 0 |
| <i>Zonosaurus_brygoi</i>           | 1 | 0 | 0 | 0 |
| <i>Zonosaurus_haraldmeieri</i>     | 1 | 0 | 0 | 0 |
| <i>Zonosaurus_karsteni</i>         | 1 | 0 | 0 | 0 |
| <i>Zonosaurus_laticaudatus</i>     | 1 | 0 | 0 | 0 |
| <i>Zonosaurus_madagascariensis</i> | 1 | 0 | 0 | 0 |
| <i>Zonosaurus_ornatus</i>          | 1 | 0 | 0 | 0 |
| <i>Zonosaurus_quadrilineatus</i>   | 1 | 0 | 0 | 0 |
| <i>Zonosaurus_rufipes</i>          | 1 | 0 | 0 | 0 |
| <i>Zonosaurus_subunicolor</i>      | 1 | 0 | 0 | 0 |
| <i>Zonosaurus_trilineatus</i>      | 1 | 0 | 0 | 0 |
| <i>Zonosaurus_tsingy</i>           | 1 | 0 | 0 | 0 |
| <i>Zootoca_vivipara</i>            | - | 0 | 0 | 0 |
| <b>Testudines</b>                  |   |   |   |   |
| <i>Actinemys_marmorata</i>         | 1 | 1 | 1 | 1 |
| <i>Apalone_ferox</i>               | 1 | 1 | 1 | 1 |
| <i>Astrochelys_radiata</i>         | 1 | 1 | 1 | 1 |
| <i>Batagur_baska</i>               | 1 | 1 | 1 | 1 |
| <i>Batagur_borneoensis</i>         | 1 | 1 | 1 | 1 |
| <i>Caretta_caretta</i>             | 1 | 1 | 1 | 1 |
| <i>Carettochelys_insculpta</i>     | 1 | 1 | 1 | 1 |
| <i>Chelodina_rugosa</i>            | 0 | 1 | 1 | 1 |
| <i>Chelonia_mydas</i>              | 1 | 1 | 1 | 1 |
| <i>Chelonoidis_abingdonii</i>      | 1 | 1 | 1 | 1 |
| <i>Chelonoidis_becki</i>           | 1 | 1 | 1 | 1 |
| <i>Chelonoidis_carbonaria</i>      | 1 | 1 | 1 | 1 |
| <i>Chelonoidis_chathamensis</i>    | 1 | 1 | 1 | 1 |
| <i>Chelonoidis_chilensis</i>       | 1 | 1 | 1 | 1 |
| <i>Chelonoidis_darwini</i>         | 1 | 1 | 1 | 1 |
| <i>Chelonoidis_denticulata</i>     | 1 | 1 | 1 | 1 |
| <i>Chelonoidis_hoodensis</i>       | 1 | 1 | 1 | 1 |
| <i>Chelonoidis_nigra</i>           | 1 | 1 | 1 | 1 |
| <i>Chelonoidis_phantastica</i>     | 1 | 1 | 1 | 1 |



|                                      |   |   |   |   |
|--------------------------------------|---|---|---|---|
| <i>Chelonoidis_porteri</i>           | 1 | 1 | 1 | 1 |
| <i>Chelonoidis_vicina</i>            | 1 | 1 | 1 | 1 |
| <i>Chelonoidis_wallacei</i>          | 1 | 1 | 1 | 1 |
| <i>Chelus_fimbriata</i>              | 1 | 1 | 1 | 1 |
| <i>Chelydra_serpentina</i>           | 1 | 1 | 1 | 1 |
| <i>Chrysemys_picta</i>               | 1 | 1 | 1 | 1 |
| <i>Clemmys_guttata</i>               | 1 | 1 | 1 | 1 |
| <i>Cuoraamboinensis</i>              | 1 | 1 | 1 | 1 |
| <i>Cuora_aurocapitata</i>            | 1 | 1 | 1 | 1 |
| <i>Cuora_flavomarginata</i>          | 1 | 1 | 1 | 1 |
| <i>Cuora_galbinifrons</i>            | 1 | 1 | 1 | 1 |
| <i>Cuora_mouhotii</i>                | 1 | 1 | 1 | 1 |
| <i>Cuora_pani</i>                    | 1 | 1 | 1 | 1 |
| <i>Cyclanorbis_senegalensis</i>      | 1 | 1 | 1 | 1 |
| <i>Cyclemys_atripans</i>             | 1 | 1 | 1 | 1 |
| <i>Cycloderma_aubryi</i>             | 1 | 1 | 1 | 1 |
| <i>Dermatemys_mawii</i>              | 0 | 1 | 1 | 1 |
| <i>Dermochelys_coriacea</i>          | 1 | 1 | 1 | 1 |
| <i>Dogania_subplana</i>              | 1 | 1 | 1 | 1 |
| <i>Elseya_albagula</i>               | 1 | 1 | 1 | 1 |
| <i>Emydoidea_blandingii</i>          | 1 | 1 | 1 | 1 |
| <i>Emys_orbicularis</i>              | 1 | 1 | 1 | 1 |
| <i>Emys_trinacris</i>                | 1 | 1 | 1 | 1 |
| <i>Eretmochelys_imbricata</i>        | 1 | 1 | 1 | 1 |
| <i>Erymnochelys_madagascariensis</i> | 1 | - | 1 | 1 |
| <i>Geoemyda_japonica</i>             | 1 | 1 | 1 | 1 |
| <i>Glyptemys_insculpta</i>           | 1 | 1 | 1 | 1 |
| <i>Glyptemys_muhlenbergii</i>        | 1 | 1 | 1 | 1 |
| <i>Gopherus_polyphemus</i>           | 1 | 1 | 1 | 1 |
| <i>Graptemys_barbouri</i>            | 1 | 1 | 1 | 1 |
| <i>Graptemys_gibbonsi</i>            | 1 | 1 | 1 | 1 |
| <i>Graptemys_pseudogeographica</i>   | 1 | 1 | 1 | 1 |
| <i>Heosemys_depressa</i>             | 1 | 1 | 1 | 1 |
| <i>Indotestudo_elongata</i>          | 1 | 1 | 1 | 1 |
| <i>Indotestudo_forstenii</i>         | 1 | 1 | 1 | 1 |
| <i>Lepidochelys_kempii</i>           | 1 | 1 | 1 | 1 |
| <i>Lepidochelys_olivacea</i>         | 1 | 1 | 1 | 1 |
| <i>Lissemys_punctata</i>             | 1 | 1 | 1 | 1 |
| <i>Lissemys_scutata</i>              | 1 | 1 | 1 | 1 |
| <i>Macrochelys_temminckii</i>        | 1 | 1 | 1 | 1 |
| <i>Malaclemys_terrapi</i>            | 1 | 1 | 1 | 1 |
| <i>Malacochersus_tornieri</i>        | 1 | 1 | 1 | 1 |
| <i>Manouria_emy</i>                  | 1 | 1 | 1 | 1 |
| <i>Manouria_impressa</i>             | 1 | 1 | 1 | 1 |

|                                  |   |   |   |   |
|----------------------------------|---|---|---|---|
| <i>Mauremys_caspica</i>          | 1 | 1 | 1 | 1 |
| <i>Mauremys_leprosa</i>          | 1 | 1 | 1 | 1 |
| <i>Mauremys_mutica</i>           | 1 | 1 | 1 | 1 |
| <i>Mauremys_reevesii</i>         | 1 | 1 | 1 | 1 |
| <i>Mauremys_rivulata</i>         | 1 | 1 | 1 | 1 |
| <i>Melanochelys_trijuga</i>      | 1 | 1 | 1 | 1 |
| <i>Natator_depressa</i>          | 1 | 1 | 1 | 1 |
| <i>Palea_steindachneri</i>       | 1 | 1 | 1 | 1 |
| <i>Pelodiscus_sinensis</i>       | 1 | 1 | 1 | 1 |
| <i>Pelomedusa_subrufa</i>        | 1 | 0 | 1 | 1 |
| <i>Peltocephalus_dumeriliana</i> | 1 | - | 1 | 1 |
| <i>Pelusios_castanoides</i>      | 1 | 1 | 1 | 1 |
| <i>Phrynops_hilarii</i>          | 1 | 1 | 1 | 1 |
| <i>Platysternon_megacephalum</i> | 1 | 1 | 1 | 1 |
| <i>Podocnemis_erythrocephala</i> | 1 | - | 1 | 1 |
| <i>Podocnemis_expansa</i>        | 1 | 1 | 1 | 1 |
| <i>Podocnemis_lewyana</i>        | 1 | - | 1 | 1 |
| <i>Podocnemis_sextuberculata</i> | 1 | - | 1 | 1 |
| <i>Podocnemis_unifilis</i>       | 1 | 1 | 1 | 1 |
| <i>Podocnemis_vogli</i>          | 1 | - | 1 | 1 |
| <i>Psammobates_pardalis</i>      | 1 | 1 | 1 | 1 |
| <i>Pseudemys_concinna</i>        | 1 | 1 | 1 | 1 |
| <i>Pseudemys_floridana</i>       | 1 | 1 | 1 | 1 |
| <i>Pyxis_arachnoides</i>         | 1 | 1 | 1 | 1 |
| <i>Rhinoclemmys_annulata</i>     | 1 | 1 | 1 | 1 |
| <i>Rhinoclemmys_areolata</i>     | 1 | 1 | 1 | 1 |
| <i>Rhinoclemmys_diademata</i>    | 1 | - | 1 | 1 |
| <i>Rhinoclemmys_funerea</i>      | 1 | - | 1 | 1 |
| <i>Rhinoclemmys_melanosterna</i> | 1 | - | 1 | 1 |
| <i>Rhinoclemmys_nasuta</i>       | 1 | - | 1 | 1 |
| <i>Rhinoclemmys_punctularia</i>  | 1 | - | 1 | 1 |
| <i>Rhinoclemmys_rubida</i>       | 1 | - | 1 | 1 |
| <i>Sacalia_quadriocellata</i>    | 1 | 1 | 1 | 1 |
| <i>Staurotypus_triporcatus</i>   | 1 | 1 | 1 | 1 |
| <i>Sternotherus_odoratus</i>     | 1 | 1 | 1 | 1 |
| <i>Terrapene_carolina</i>        | 1 | 1 | 1 | 1 |
| <i>Terrapene_coahuila</i>        | 1 | 1 | 1 | 1 |
| <i>Terrapene_ornata</i>          | 1 | 1 | 1 | 1 |
| <i>Testudo_graeca</i>            | 1 | 1 | 1 | 1 |
| <i>Testudo_horsfieldii</i>       | 1 | 1 | 1 | 1 |
| <i>Testudo_kleinmanni</i>        | 1 | 1 | 1 | 1 |
| <i>Testudo_marginata</i>         | 1 | 1 | 1 | 1 |
| <i>Trachemys_adiutrix</i>        | 1 | 1 | 1 | 1 |
| <i>Trachemys_dorbigni</i>        | 1 | 1 | 1 | 1 |

|                                   |   |   |   |   |
|-----------------------------------|---|---|---|---|
| <i>Trachemys_emolli</i>           | 1 | 1 | 1 | 1 |
| <i>Trachemys_ornata</i>           | 1 | 1 | 1 | 1 |
| <i>Trachemys_scripta</i>          | 1 | 1 | 1 | 1 |
| <i>Trachemys_venusta</i>          | 1 | 1 | 1 | 1 |
| <i>Trionyx_triunguis</i>          | 1 | 1 | 1 | 1 |
| <b>Crocodylia</b>                 |   |   |   |   |
| <i>Alligator_mississippiensis</i> | 1 | 1 | 1 | 0 |
| <i>Alligator_sinensis</i>         | 1 | 1 | 1 | 0 |
| <i>Caiman_crocodilus</i>          | 1 | 1 | 1 | 0 |
| <i>Caiman_latirostris</i>         | 1 | 1 | 1 | 0 |
| <i>Caiman_yacare</i>              | 1 | 1 | 1 | 0 |
| <i>Crocodylus_acutus</i>          | 1 | 1 | 1 | 0 |
| <i>Crocodylus_intermedius</i>     | 1 | 1 | 1 | 0 |
| <i>Crocodylus_johnsoni</i>        | 1 | 1 | 1 | 0 |
| <i>Crocodylus_mindorensis</i>     | 1 | 1 | 1 | 0 |
| <i>Crocodylus_moreletii</i>       | 1 | 1 | 1 | 0 |
| <i>Crocodylus_niloticus</i>       | 1 | 1 | 1 | 0 |
| <i>Crocodylus_novaeguineae</i>    | 1 | 1 | 1 | 0 |
| <i>Crocodylus_palustris</i>       | 1 | 1 | 1 | 0 |
| <i>Crocodylus_porosus</i>         | 1 | 1 | 1 | 0 |
| <i>Crocodylus_rhombifer</i>       | 1 | 1 | 1 | 0 |
| <i>Crocodylus_siamensis</i>       | 1 | 1 | 1 | 0 |
| <i>Gavialis_gangeticus</i>        | 1 | 1 | 1 | 0 |
| <i>Mecistops_cataphractus</i>     | 1 | 1 | 1 | 0 |
| <i>Melanosuchus_niger</i>         | 1 | 1 | 1 | 0 |
| <i>Osteolaemus_tetraspis</i>      | 1 | 1 | 1 | 0 |
| <i>Paleosuchus_palpebrosus</i>    | 1 | 1 | 1 | 0 |
| <i>Paleosuchus_trigonatus</i>     | 1 | 1 | 1 | 0 |
| <i>Tomistoma_schlegelii</i>       | 1 | 1 | 1 | 0 |
| <b>Aves</b>                       |   |   |   |   |
| <i>Abroscopus_schisticeps</i>     | 1 | 1 | 1 | 1 |
| <i>Abroscopus_superciliaris</i>   | 1 | 1 | 1 | 1 |
| <i>Aburria_aburri</i>             | 1 | 1 | 1 | 1 |
| <i>Acanthagenys_rufogularis</i>   | 1 | 1 | 1 | 1 |
| <i>Acanthidops_bairdii</i>        | 1 | 1 | 1 | 1 |
| <i>Acanthisitta_chloris</i>       | 1 | 1 | 1 | 1 |
| <i>Acanthiza_apicalis</i>         | 1 | 1 | 1 | 1 |
| <i>Acanthiza_chrysorrhoa</i>      | 1 | 1 | 1 | 1 |
| <i>Acanthiza_ewingii</i>          | 1 | 1 | 1 | 1 |
| <i>Acanthiza_inornata</i>         | 1 | 1 | 1 | 1 |
| <i>Acanthiza_iredalei</i>         | 1 | 1 | 1 | 1 |
| <i>Acanthiza_katherina</i>        | 1 | 1 | 1 | 1 |
| <i>Acanthiza_lineata</i>          | 1 | 1 | 1 | 1 |
| <i>Acanthiza_murina</i>           | 1 | 1 | 1 | 1 |

|                                      |   |   |   |   |
|--------------------------------------|---|---|---|---|
| <i>Acanthiza_nana</i>                | 1 | 1 | 1 | 1 |
| <i>Acanthiza_pusilla</i>             | 1 | 1 | 1 | 1 |
| <i>Acanthiza_reguloides</i>          | 1 | 1 | 1 | 1 |
| <i>Acanthiza_robustirostris</i>      | 1 | 1 | 1 | 1 |
| <i>Acanthiza_uropygialis</i>         | 1 | 1 | 1 | 1 |
| <i>Acanthorhynchus_superciliosus</i> | 1 | 1 | 1 | 1 |
| <i>Acanthorhynchus_tenuirostris</i>  | 1 | 1 | 1 | 1 |
| <i>Acanthornis_magna</i>             | 1 | 1 | 1 | 1 |
| <i>Accipiter_bicolor</i>             | 1 | 1 | 1 | 1 |
| <i>Accipiter_cirrocephalus</i>       | 1 | 1 | 1 | 1 |
| <i>Accipiter_cooperii</i>            | 1 | 1 | 1 | 1 |
| <i>Accipiter_erythronemius</i>       | 1 | 1 | 1 | 1 |
| <i>Accipiter_gentilis</i>            | 1 | 1 | 1 | 1 |
| <i>Accipiter_gularis</i>             | 1 | 1 | 1 | 1 |
| <i>Accipiter_imitator</i>            | 1 | 1 | 1 | 1 |
| <i>Accipiter_nisus</i>               | 1 | 1 | 1 | 1 |
| <i>Accipiter_novaehollandiae</i>     | 1 | 1 | 1 | 1 |
| <i>Accipiter_rufiventris</i>         | 1 | 1 | 1 | 1 |
| <i>Accipiter_soloensis</i>           | 1 | 1 | 1 | 1 |
| <i>Accipiter_striatus</i>            | 1 | 1 | 1 | 1 |
| <i>Accipiter_superciliosus</i>       | 1 | 1 | 1 | 1 |
| <i>Accipiter_tachiro</i>             | 1 | 1 | 1 | 1 |
| <i>Accipiter_trivirgatus</i>         | 1 | 1 | 1 | 1 |
| <i>Accipiter_virgatus</i>            | 1 | 1 | 1 | 1 |
| <i>Aceros_cassidix</i>               | 1 | 1 | 1 | 1 |
| <i>Aceros_corrugatus</i>             | 1 | 1 | 1 | 1 |
| <i>Aceros_nipalensis</i>             | 1 | 1 | 1 | 1 |
| <i>Aceros_plicatus</i>               | 1 | 1 | 1 | 1 |
| <i>Achaetops_pycnopygius</i>         | 1 | 1 | 1 | 1 |
| <i>Acridotheres_albocinctus</i>      | 1 | 1 | 1 | 1 |
| <i>Acridotheres_cinereus</i>         | 1 | 1 | 1 | 1 |
| <i>Acridotheres_cristatellus</i>     | 1 | 1 | 1 | 1 |
| <i>Acridotheres_fuscus</i>           | 1 | 1 | 1 | 1 |
| <i>Acridotheres_ginginianus</i>      | 1 | 1 | 1 | 1 |
| <i>Acridotheres_grandis</i>          | 1 | 1 | 1 | 1 |
| <i>Acridotheres_javanicus</i>        | 1 | 1 | 1 | 1 |
| <i>Acridotheres_melanopterus</i>     | 1 | 1 | 1 | 1 |
| <i>Acrobatormis_fonsecai</i>         | 1 | 1 | 1 | 1 |
| <i>Acrocephalus_aedon</i>            | 1 | 1 | 1 | 1 |
| <i>Acrocephalus_aequinoctialis</i>   | 1 | 1 | 1 | 1 |
| <i>Acrocephalus_agricola</i>         | 1 | 1 | 1 | 1 |
| <i>Acrocephalus_arundinaceus</i>     | 1 | 1 | 1 | 1 |
| <i>Acrocephalus_atyphus</i>          | 1 | 1 | 1 | 1 |
| <i>Acrocephalus_australis</i>        | 1 | 1 | 1 | 1 |

|                                    |   |   |   |   |
|------------------------------------|---|---|---|---|
| <i>Acrocephalus_baeticatus</i>     | 1 | 1 | 1 | 1 |
| <i>Acrocephalus_bistrigiceps</i>   | 1 | 1 | 1 | 1 |
| <i>Acrocephalus_brevipennis</i>    | 1 | 1 | 1 | 1 |
| <i>Acrocephalus_caffer</i>         | 1 | 1 | 1 | 1 |
| <i>Acrocephalus_concinens</i>      | 1 | 1 | 1 | 1 |
| <i>Acrocephalus_dumetorum</i>      | 1 | 1 | 1 | 1 |
| <i>Acrocephalus_familiaris</i>     | 1 | 1 | 1 | 1 |
| <i>Acrocephalus_gracilirostris</i> | 1 | 1 | 1 | 1 |
| <i>Acrocephalus_griseldis</i>      | 1 | 1 | 1 | 1 |
| <i>Acrocephalus_kerearako</i>      | 1 | 1 | 1 | 1 |
| <i>Acrocephalus_melanopogon</i>    | 1 | 1 | 1 | 1 |
| <i>Acrocephalus_mendanae</i>       | 1 | 1 | 1 | 1 |
| <i>Acrocephalus_newtoni</i>        | 1 | 1 | 1 | 1 |
| <i>Acrocephalus_orinus</i>         | 1 | 1 | 1 | 1 |
| <i>Acrocephalus_paludicola</i>     | 1 | 1 | 1 | 1 |
| <i>Acrocephalus_palustris</i>      | 1 | 1 | 1 | 1 |
| <i>Acrocephalus_rimitarae</i>      | 1 | 1 | 1 | 1 |
| <i>Acrocephalus_rufescens</i>      | 1 | 1 | 1 | 1 |
| <i>Acrocephalus_schoenobaenus</i>  | 1 | 1 | 1 | 1 |
| <i>Acrocephalus_scirpaceus</i>     | 1 | 1 | 1 | 1 |
| <i>Acrocephalus_sechellensis</i>   | 1 | 1 | 1 | 1 |
| <i>Acrocephalus_stentoreus</i>     | 1 | 1 | 1 | 1 |
| <i>Acrocephalus_taiti</i>          | 1 | 1 | 1 | 1 |
| <i>Acrocephalus_tangorum</i>       | 1 | 1 | 1 | 1 |
| <i>Acrocephalus_vaughani</i>       | 1 | 1 | 1 | 1 |
| <i>Acropternis_orthonyx</i>        | 1 | 1 | 1 | 1 |
| <i>Acryllium_vulturinum</i>        | 1 | 1 | 1 | 1 |
| <i>Actenoides_concretus</i>        | 1 | 1 | 1 | 1 |
| <i>Actenoides_lindsayi</i>         | 1 | 1 | 1 | 1 |
| <i>Actinodura_egertoni</i>         | 1 | 1 | 1 | 1 |
| <i>Actinodura_morrisoniana</i>     | 1 | 1 | 1 | 1 |
| <i>Actinodura_nipalensis</i>       | 1 | 1 | 1 | 1 |
| <i>Actinodura_ramsayi</i>          | 1 | 1 | 1 | 1 |
| <i>Actinodura_souliei</i>          | 1 | 1 | 1 | 1 |
| <i>Actinodura_waldeni</i>          | 1 | 1 | 1 | 1 |
| <i>Actitis_hypoleucos</i>          | 1 | 1 | 1 | 1 |
| <i>Actitis_macularia</i>           | 1 | 1 | 1 | 1 |
| <i>Actophilornis_africanus</i>     | 1 | 1 | 1 | 1 |
| <i>Adelomyia_melanogenys</i>       | 1 | 1 | 1 | 1 |
| <i>Aechmophorus_clarkii</i>        | 1 | 1 | 1 | 1 |
| <i>Aechmophorus_occidentalis</i>   | 1 | 1 | 1 | 1 |
| <i>Aegithalos_caudatus</i>         | 1 | 1 | 1 | 1 |
| <i>Aegithalos_concinus</i>         | 1 | 1 | 1 | 1 |
| <i>Aegithalos_fuliginosus</i>      | 1 | 1 | 1 | 1 |

|                                 |   |   |   |   |
|---------------------------------|---|---|---|---|
| <i>Aegithalos_glaucogularis</i> | 1 | 1 | 1 | 1 |
| <i>Aegithalos_iouschistos</i>   | 1 | 1 | 1 | 1 |
| <i>Aegithalos_leucogenys</i>    | 1 | 1 | 1 | 1 |
| <i>Aegithalos_niveogularis</i>  | 1 | 1 | 1 | 1 |
| <i>Aegithina_tiphia</i>         | 1 | 1 | 1 | 1 |
| <i>Aegolius_acadicus</i>        | 1 | 1 | 1 | 1 |
| <i>Aegolius_funereus</i>        | 1 | 1 | 1 | 1 |
| <i>Aegolius_harrisii</i>        | 1 | 1 | 1 | 1 |
| <i>Aegotheles_albertisi</i>     | 1 | 1 | 1 | 1 |
| <i>Aegotheles_archboldi</i>     | 1 | 1 | 1 | 1 |
| <i>Aegotheles_bennettii</i>     | 1 | 1 | 1 | 1 |
| <i>Aegotheles_cristatus</i>     | 1 | 1 | 1 | 1 |
| <i>Aegotheles_savesi</i>        | 1 | 1 | 1 | 1 |
| <i>Aegotheles_wallacii</i>      | 1 | 1 | 1 | 1 |
| <i>Aegyptius_monachus</i>       | 1 | 1 | 1 | 1 |
| <i>Aepyodius_arfakianus</i>     | 1 | 1 | 0 | 1 |
| <i>Aerodramus_bartschi</i>      | 1 | 1 | 1 | 1 |
| <i>Aerodramus_brevirostris</i>  | 1 | 1 | 1 | 1 |
| <i>Aerodramus_elaphrus</i>      | 1 | 1 | 1 | 1 |
| <i>Aerodramus_francicus</i>     | 1 | 1 | 1 | 1 |
| <i>Aerodramus_fuciphagus</i>    | 1 | 1 | 1 | 1 |
| <i>Aerodramus_maximus</i>       | 1 | 1 | 1 | 1 |
| <i>Aerodramus_mearnsi</i>       | 1 | 1 | 1 | 1 |
| <i>Aerodramus_papuensis</i>     | 1 | 1 | 1 | 1 |
| <i>Aerodramus_salangana</i>     | 1 | 1 | 1 | 1 |
| <i>Aerodramus_sawtelli</i>      | 1 | 1 | 1 | 1 |
| <i>Aerodramus_spodiopygius</i>  | 1 | 1 | 1 | 1 |
| <i>Aerodramus_terraereginae</i> | 1 | 1 | 1 | 1 |
| <i>Aerodramus_vulcanorum</i>    | 1 | 1 | 1 | 1 |
| <i>Aerodramus_whiteheadi</i>    | 1 | 1 | 1 | 1 |
| <i>Aeronautes_saxatalis</i>     | 1 | 1 | 1 | 1 |
| <i>Aethia_cristatella</i>       | 1 | 1 | 1 | 1 |
| <i>Aethia_pusilla</i>           | 1 | 1 | 1 | 1 |
| <i>Aethia_pygmaea</i>           | 1 | 1 | 1 | 1 |
| <i>Aethopyga_boltoni</i>        | 1 | 1 | 1 | 1 |
| <i>Aethopyga_christinae</i>     | 1 | 1 | 1 | 1 |
| <i>Aethopyga_duyvenbodei</i>    | 1 | 1 | 1 | 1 |
| <i>Aethopyga_flagrans</i>       | 1 | 1 | 1 | 1 |
| <i>Aethopyga_primigenia</i>     | 1 | 1 | 1 | 1 |
| <i>Aethopyga_siparaja</i>       | 1 | 1 | 1 | 1 |
| <i>Afropavo_congensis</i>       | 1 | 1 | 1 | 1 |
| <i>Afrotis_afra</i>             | 1 | 1 | 1 | 1 |
| <i>Afrotis_afraoides</i>        | 1 | 1 | 1 | 1 |
| <i>Agapornis_canus</i>          | 1 | 1 | 1 | 1 |

|                                 |   |   |   |   |
|---------------------------------|---|---|---|---|
| <i>Agapornis_fischeri</i>       | 1 | 1 | 1 | 1 |
| <i>Agapornis_liliana</i>        | 1 | 1 | 1 | 1 |
| <i>Agapornis_nigrigenis</i>     | 1 | 1 | 1 | 1 |
| <i>Agapornis_personata</i>      | 1 | 1 | 1 | 1 |
| <i>Agapornis_pullaria</i>       | 1 | 1 | 1 | 1 |
| <i>Agapornis_roseicollis</i>    | 1 | 1 | 1 | 1 |
| <i>Agapornis_taranta</i>        | 1 | 1 | 1 | 1 |
| <i>Agelaius_humeralis</i>       | 1 | 1 | 1 | 1 |
| <i>Agelaius_phoeniceus</i>      | 1 | 1 | 1 | 1 |
| <i>Agelaius_tricolor</i>        | 1 | 1 | 1 | 1 |
| <i>Agelaius_xanthomus</i>       | 1 | 1 | 1 | 1 |
| <i>Agelastes_meleagrides</i>    | 1 | 1 | 1 | 1 |
| <i>Aglaeactis_castelnaudii</i>  | 1 | 1 | 1 | 1 |
| <i>Aglaeactis_cupripennis</i>   | 1 | 1 | 1 | 1 |
| <i>Aglaeactis_pamela</i>        | 1 | 1 | 1 | 1 |
| <i>Aglaiocercus_coelestis</i>   | 1 | 1 | 1 | 1 |
| <i>Aglaiocercus_kingi</i>       | 1 | 1 | 1 | 1 |
| <i>Agriornis_andicola</i>       | 1 | 1 | 1 | 1 |
| <i>Agriornis_micropterus</i>    | 1 | 1 | 1 | 1 |
| <i>Agriornis_montana</i>        | 1 | 1 | 1 | 1 |
| <i>Agriornis_murinus</i>        | 1 | 1 | 1 | 1 |
| <i>Ailuroedus_crassirostris</i> | 1 | 1 | 1 | 1 |
| <i>Ailuroedus_melanotis</i>     | 1 | 1 | 1 | 1 |
| <i>Aimophila_aestivalis</i>     | 1 | 1 | 1 | 1 |
| <i>Aimophila_carpalis</i>       | 1 | 1 | 1 | 1 |
| <i>Aimophila_cassinii</i>       | 1 | 1 | 1 | 1 |
| <i>Aimophila_humeralis</i>      | 1 | 1 | 1 | 1 |
| <i>Aimophila_mystacalis</i>     | 1 | 1 | 1 | 1 |
| <i>Aimophila_notosticta</i>     | 1 | 1 | 1 | 1 |
| <i>Aimophila_quinquestriata</i> | 1 | 1 | 1 | 1 |
| <i>Aimophila_rufescens</i>      | 1 | 1 | 1 | 1 |
| <i>Aimophila_ruficauda</i>      | 1 | 1 | 1 | 1 |
| <i>Aimophila_ruficeps</i>       | 1 | 1 | 1 | 1 |
| <i>Aimophila_stolzmanni</i>     | 1 | 1 | 1 | 1 |
| <i>Aimophila_strigiceps</i>     | 1 | 1 | 1 | 1 |
| <i>Aimophila_sumichrasti</i>    | 1 | 1 | 1 | 1 |
| <i>Aix_galericulata</i>         | 1 | 1 | 1 | 1 |
| <i>Aix_sponsa</i>               | 1 | 1 | 1 | 1 |
| <i>Alaemon_alaudipes</i>        | 1 | 1 | 1 | 1 |
| <i>Alauda_arvensis</i>          | 1 | 1 | 1 | 1 |
| <i>Alauda_gulgula</i>           | 1 | 1 | 1 | 1 |
| <i>Alca_torda</i>               | 1 | 1 | 1 | 1 |
| <i>Alcedo_argentata</i>         | 1 | 1 | 1 | 1 |
| <i>Alcedo_atthis</i>            | 1 | 1 | 1 | 1 |

|                                     |   |   |   |   |
|-------------------------------------|---|---|---|---|
| <i>Alcedo_azurea</i>                | 1 | 1 | 1 | 1 |
| <i>Alcedo_coerulescens</i>          | 1 | 1 | 1 | 1 |
| <i>Alcedo_cristata</i>              | 1 | 1 | 1 | 1 |
| <i>Alcedo_cyanopectus</i>           | 1 | 1 | 1 | 1 |
| <i>Alcedo_euryzona</i>              | 1 | 1 | 1 | 1 |
| <i>Alcedo_hercules</i>              | 1 | 1 | 1 | 1 |
| <i>Alcedo_leucogaster</i>           | 1 | 1 | 1 | 1 |
| <i>Alcedo_meninting</i>             | 1 | 1 | 1 | 1 |
| <i>Alcedo_pusilla</i>               | 1 | 1 | 1 | 1 |
| <i>Alcedo_quadribrachys</i>         | 1 | 1 | 1 | 1 |
| <i>Alcedo_semitorquata</i>          | 1 | 1 | 1 | 1 |
| <i>Alcedo_vintsioides</i>           | 1 | 1 | 1 | 1 |
| <i>Alcedo_websteri</i>              | 1 | 1 | 1 | 1 |
| <i>Alcippe_brunnea</i>              | 1 | 1 | 1 | 1 |
| <i>Alcippe_brunneicauda</i>         | 1 | 1 | 1 | 1 |
| <i>Alcippe_castaneiceps</i>         | 1 | 1 | 1 | 1 |
| <i>Alcippe_chrysotis</i>            | 1 | 1 | 1 | 1 |
| <i>Alcippe_cinerea</i>              | 1 | 1 | 1 | 1 |
| <i>Alcippe_cinereiceps</i>          | 1 | 1 | 1 | 1 |
| <i>Alcippe_dubia</i>                | 1 | 1 | 1 | 1 |
| <i>Alcippe_grotei</i>               | 1 | 1 | 1 | 1 |
| <i>Alcippe_morrisonia</i>           | 1 | 1 | 1 | 1 |
| <i>Alcippe_nipalensis</i>           | 1 | 1 | 1 | 1 |
| <i>Alcippe_peracensis</i>           | 1 | 1 | 1 | 1 |
| <i>Alcippe_poioicephala</i>         | 1 | 1 | 1 | 1 |
| <i>Alcippe_ruficapilla</i>          | 1 | 1 | 1 | 1 |
| <i>Alcippe_rufogularis</i>          | 1 | 1 | 1 | 1 |
| <i>Alcippe_striaticollis</i>        | 1 | 1 | 1 | 1 |
| <i>Alcippe_vinipectus</i>           | 1 | 1 | 1 | 1 |
| <i>Aleadryas_rufinucha</i>          | 1 | 1 | 1 | 1 |
| <i>Alectoris_barbara</i>            | 1 | 1 | 1 | 1 |
| <i>Alectoris_chukar</i>             | 1 | 1 | 1 | 1 |
| <i>Alectoris_graeca</i>             | 1 | 1 | 1 | 1 |
| <i>Alectoris_magna</i>              | 1 | 1 | 1 | 1 |
| <i>Alectoris_melanocephala</i>      | 1 | 1 | 1 | 1 |
| <i>Alectoris_philbyi</i>            | 1 | 1 | 1 | 1 |
| <i>Alectoris_rufa</i>               | 1 | 1 | 1 | 1 |
| <i>Alectroenas_madagascariensis</i> | 1 | 1 | 1 | 1 |
| <i>Alectrurus_risora</i>            | 1 | 1 | 1 | 1 |
| <i>Alectrurus_tricolor</i>          | 1 | 1 | 1 | 1 |
| <i>Alectura_lathamii</i>            | 1 | 1 | 0 | 1 |
| <i>Alethe_choloensis</i>            | 1 | 1 | 1 | 1 |
| <i>Alethe_diademata</i>             | 1 | 1 | 1 | 1 |
| <i>Alethe_fuelleborni</i>           | 1 | 1 | 1 | 1 |



|                                |   |   |   |   |
|--------------------------------|---|---|---|---|
| <i>Alethe_poliocephala</i>     | 1 | 1 | 1 | 1 |
| <i>Alethe_poliophrys</i>       | 1 | 1 | 1 | 1 |
| <i>Alisterus_amboinensis</i>   | 1 | 1 | 1 | 1 |
| <i>Alisterus_chloropterus</i>  | 1 | 1 | 1 | 1 |
| <i>Alisterus_scapularis</i>    | 1 | 1 | 1 | 1 |
| <i>Alle_alle</i>               | 1 | 1 | 1 | 1 |
| <i>Alopochelidon_fucata</i>    | 1 | 1 | 1 | 1 |
| <i>Alopochen_aegyptiacus</i>   | 1 | 1 | 1 | 1 |
| <i>Amadina_erythrocephala</i>  | 1 | 1 | 1 | 1 |
| <i>Amadina_fasciata</i>        | 1 | 1 | 1 | 1 |
| <i>Amalocichla_incerta</i>     | 1 | 1 | 1 | 1 |
| <i>Amalocichla_sclateriana</i> | 1 | 1 | 1 | 1 |
| <i>Amandava_amandava</i>       | 1 | 1 | 1 | 1 |
| <i>Amandava_formosa</i>        | 1 | 1 | 1 | 1 |
| <i>Amandava_subflava</i>       | 1 | 1 | 1 | 1 |
| <i>Amaurocichla_bocagii</i>    | 1 | 1 | 1 | 1 |
| <i>Amaurornis_akool</i>        | 1 | 1 | 1 | 1 |
| <i>Amaurospiza_concolor</i>    | 1 | 1 | 1 | 1 |
| <i>Amazilia_amabilis</i>       | 1 | 1 | 1 | 1 |
| <i>Amazilia_amazilia</i>       | 1 | 1 | 1 | 1 |
| <i>Amazilia_beryllina</i>      | 1 | 1 | 1 | 1 |
| <i>Amazilia_chionogaster</i>   | 1 | 1 | 1 | 1 |
| <i>Amazilia_decora</i>         | 1 | 1 | 1 | 1 |
| <i>Amazilia_fimbriata</i>      | 1 | 1 | 1 | 1 |
| <i>Amazilia_franciae</i>       | 1 | 1 | 1 | 1 |
| <i>Amazilia_lactea</i>         | 1 | 1 | 1 | 1 |
| <i>Amazilia_rosenbergi</i>     | 1 | 1 | 1 | 1 |
| <i>Amazilia_rutila</i>         | 1 | 1 | 1 | 1 |
| <i>Amazilia_saucerrottei</i>   | 1 | 1 | 1 | 1 |
| <i>Amazilia_tobaci</i>         | 1 | 1 | 1 | 1 |
| <i>Amazilia_tzacatl</i>        | 1 | 1 | 1 | 1 |
| <i>Amazilia_versicolor</i>     | 1 | 1 | 1 | 1 |
| <i>Amazilia_viridicauda</i>    | 1 | 1 | 1 | 1 |
| <i>Amazilia_viridigaster</i>   | 1 | 1 | 1 | 1 |
| <i>Amazilia_yucatanensis</i>   | 1 | 1 | 1 | 1 |
| <i>Amazona_aestiva</i>         | 1 | 1 | 1 | 1 |
| <i>Amazona_agilis</i>          | 1 | 1 | 1 | 1 |
| <i>Amazona_albifrons</i>       | 1 | 1 | 1 | 1 |
| <i>Amazona_amazonica</i>       | 1 | 1 | 1 | 1 |
| <i>Amazona_arausiaca</i>       | 1 | 1 | 1 | 1 |
| <i>Amazona_auropalliata</i>    | 1 | 1 | 1 | 1 |
| <i>Amazona_autumnalis</i>      | 1 | 1 | 1 | 1 |
| <i>Amazona_barbadensis</i>     | 1 | 1 | 1 | 1 |
| <i>Amazona_brasiliensis</i>    | 1 | 1 | 1 | 1 |

|                                  |   |   |   |   |
|----------------------------------|---|---|---|---|
| <i>Amazona_collaria</i>          | 1 | 1 | 1 | 1 |
| <i>Amazona_dufresniana</i>       | 1 | 1 | 1 | 1 |
| <i>Amazona_farinosa</i>          | 1 | 1 | 1 | 1 |
| <i>Amazona_festiva</i>           | 1 | 1 | 1 | 1 |
| <i>Amazona_finschi</i>           | 1 | 1 | 1 | 1 |
| <i>Amazona_guildingii</i>        | 1 | 1 | 1 | 1 |
| <i>Amazona_imperialis</i>        | 1 | 1 | 1 | 1 |
| <i>Amazona_kawalli</i>           | 1 | 1 | 1 | 1 |
| <i>Amazona_leucocephala</i>      | 1 | 1 | 1 | 1 |
| <i>Amazona_ochrocephala</i>      | 1 | 1 | 1 | 1 |
| <i>Amazona_oratrix</i>           | 1 | 1 | 1 | 1 |
| <i>Amazona_pretrei</i>           | 1 | 1 | 1 | 1 |
| <i>Amazona_rhodocorytha</i>      | 1 | 1 | 1 | 1 |
| <i>Amazona_tucumana</i>          | 1 | 1 | 1 | 1 |
| <i>Amazona_ventralis</i>         | 1 | 1 | 1 | 1 |
| <i>Amazona_versicolor</i>        | 1 | 1 | 1 | 1 |
| <i>Amazona_vinacea</i>           | 1 | 1 | 1 | 1 |
| <i>Amazona_viridigenalis</i>     | 1 | 1 | 1 | 1 |
| <i>Amazona_vittata</i>           | 1 | 1 | 1 | 1 |
| <i>Amazona_xanthops</i>          | 1 | 1 | 1 | 1 |
| <i>Amazonetta_brasiliensis</i>   | 1 | 1 | 1 | 1 |
| <i>Amblycercus_holosericeus</i>  | 1 | 1 | 1 | 1 |
| <i>Amblyornis_inornatus</i>      | 1 | 1 | 1 | 1 |
| <i>Amblyornis_macgregoriae</i>   | 1 | 1 | 1 | 1 |
| <i>Amblyornis_subalaris</i>      | 1 | 1 | 1 | 1 |
| <i>Amblyospiza_albifrons</i>     | 1 | 1 | 1 | 1 |
| <i>Amblyramphus_holosericeus</i> | 1 | 1 | 1 | 1 |
| <i>Ammodramus_aurifrons</i>      | 1 | 1 | 1 | 1 |
| <i>Ammodramus_bairdii</i>        | 1 | 1 | 1 | 1 |
| <i>Ammodramus_caudacutus</i>     | 1 | 1 | 1 | 1 |
| <i>Ammodramus_henslowii</i>      | 1 | 1 | 1 | 1 |
| <i>Ammodramus_humeralis</i>      | 1 | 1 | 1 | 1 |
| <i>Ammodramus_leconteii</i>      | 1 | 1 | 1 | 1 |
| <i>Ammodramus_maritimus</i>      | 1 | 1 | 1 | 1 |
| <i>Ammodramus_nelsoni</i>        | 1 | 1 | 1 | 1 |
| <i>Ammodramus_savannarum</i>     | 1 | 1 | 1 | 1 |
| <i>Ammomanes_cincturus</i>       | 1 | 1 | 1 | 1 |
| <i>Ammomanes_dunni</i>           | 1 | 1 | 1 | 1 |
| <i>Ammomanes_grayi</i>           | 1 | 1 | 1 | 1 |
| <i>Ammomanes_phoenicurus</i>     | 1 | 1 | 1 | 1 |
| <i>Ammoperdix_heyi</i>           | 1 | 1 | 1 | 1 |
| <i>Ampeliceps_coronatus</i>      | 1 | 1 | 1 | 1 |
| <i>Ampelioides_tschudii</i>      | 1 | 1 | 1 | 1 |
| <i>Ampelion_rubrocristatus</i>   | 1 | 1 | 1 | 1 |

|                                   |   |   |   |   |
|-----------------------------------|---|---|---|---|
| <i>Ampelion_rufaxilla</i>         | 1 | 1 | 1 | 1 |
| <i>Amphispiza_belli</i>           | 1 | 1 | 1 | 1 |
| <i>Amphispiza_bilineata</i>       | 1 | 1 | 1 | 1 |
| <i>Amytornis_ballarae</i>         | 1 | 1 | 1 | 1 |
| <i>Amytornis_barbatus</i>         | 1 | 1 | 1 | 1 |
| <i>Amytornis_dorotheae</i>        | 1 | 1 | 1 | 1 |
| <i>Amytornis_goyderi</i>          | 1 | 1 | 1 | 1 |
| <i>Amytornis_housei</i>           | 1 | 1 | 1 | 1 |
| <i>Amytornis_merrotsyi</i>        | 1 | 1 | 1 | 1 |
| <i>Amytornis_purnelli</i>         | 1 | 1 | 1 | 1 |
| <i>Amytornis_striatus</i>         | 1 | 1 | 1 | 1 |
| <i>Amytornis_textilis</i>         | 1 | 1 | 1 | 1 |
| <i>Amytornis_woodwardi</i>        | 1 | 1 | 1 | 1 |
| <i>Anabacerthia_striaticollis</i> | 1 | 1 | 1 | 1 |
| <i>Anabazenops_dorsalis</i>       | 1 | 1 | 1 | 1 |
| <i>Anabazenops_fuscus</i>         | 1 | 1 | 1 | 1 |
| <i>Anairetes_agilis</i>           | 1 | 1 | 1 | 1 |
| <i>Anairetes_agraphia</i>         | 1 | 1 | 1 | 1 |
| <i>Anairetes_alpinus</i>          | 1 | 1 | 1 | 1 |
| <i>Anairetes_fernandezianus</i>   | 1 | 1 | 1 | 1 |
| <i>Anairetes_flavirostris</i>     | 1 | 1 | 1 | 1 |
| <i>Anairetes_nigrocristatus</i>   | 1 | 1 | 1 | 1 |
| <i>Anairetes_parulus</i>          | 1 | 1 | 1 | 1 |
| <i>Anairetes_reguloides</i>       | 1 | 1 | 1 | 1 |
| <i>Anarhynchus_frontalis</i>      | 1 | 1 | 1 | 1 |
| <i>Anas_acuta</i>                 | 1 | 1 | 1 | 1 |
| <i>Anas_americana</i>             | 1 | 1 | 1 | 1 |
| <i>Anas_aucklandica</i>           | 1 | 1 | 1 | 1 |
| <i>Anas_bahamensis</i>            | 1 | 1 | 1 | 1 |
| <i>Anas_bernieri</i>              | 1 | 1 | 1 | 1 |
| <i>Anas_capensis</i>              | 1 | 1 | 1 | 1 |
| <i>Anas_carolinensis</i>          | 1 | 1 | 1 | 1 |
| <i>Anas_castanea</i>              | 1 | 1 | 1 | 1 |
| <i>Anas_chlorotis</i>             | 1 | 1 | 1 | 1 |
| <i>Anas_clypeata</i>              | 1 | 1 | 1 | 1 |
| <i>Anas_crecca</i>                | 1 | 1 | 1 | 1 |
| <i>Anas_cyanoptera</i>            | 1 | 1 | 1 | 1 |
| <i>Anas_diazi</i>                 | 1 | 1 | 1 | 1 |
| <i>Anas_discors</i>               | 1 | 1 | 1 | 1 |
| <i>Anas_erythrorhyncha</i>        | 1 | 1 | 1 | 1 |
| <i>Anas_falcata</i>               | 1 | 1 | 1 | 1 |
| <i>Anas_flavirostris</i>          | 1 | 1 | 1 | 1 |
| <i>Anas_formosa</i>               | 1 | 1 | 1 | 1 |
| <i>Anas_fulvigula</i>             | 1 | 1 | 1 | 1 |

|                                  |   |   |   |   |
|----------------------------------|---|---|---|---|
| <i>Anas_georgica</i>             | 1 | 1 | 1 | 1 |
| <i>Anas_gracilis</i>             | 1 | 1 | 1 | 1 |
| <i>Anas_hottentota</i>           | 1 | 1 | 1 | 1 |
| <i>Anas_laysanensis</i>          | 1 | 1 | 1 | 1 |
| <i>Anas_luzonica</i>             | 1 | 1 | 1 | 1 |
| <i>Anas_melleri</i>              | 1 | 1 | 1 | 1 |
| <i>Anas_nesiotis</i>             | 1 | 1 | 1 | 1 |
| <i>Anas_penelope</i>             | 1 | 1 | 1 | 1 |
| <i>Anas_platalea</i>             | 1 | 1 | 1 | 1 |
| <i>Anas_platyrhynchos</i>        | 1 | 1 | 1 | 1 |
| <i>Anas_poecilorhyncha</i>       | 1 | 1 | 1 | 1 |
| <i>Anas_puna</i>                 | 1 | 1 | 1 | 1 |
| <i>Anas_querquedula</i>          | 1 | 1 | 1 | 1 |
| <i>Anas_rhynchotis</i>           | 1 | 1 | 1 | 1 |
| <i>Anas_rubripes</i>             | 1 | 1 | 1 | 1 |
| <i>Anas_sibilatrix</i>           | 1 | 1 | 1 | 1 |
| <i>Anas_smithii</i>              | 1 | 1 | 1 | 1 |
| <i>Anas_sparsa</i>               | 1 | 1 | 1 | 1 |
| <i>Anas_strepera</i>             | 1 | 1 | 1 | 1 |
| <i>Anas_superciliosa</i>         | 1 | 1 | 1 | 1 |
| <i>Anas_undulata</i>             | 1 | 1 | 1 | 1 |
| <i>Anas_versicolor</i>           | 1 | 1 | 1 | 1 |
| <i>Anas_zonorhyncha</i>          | 1 | 1 | 1 | 1 |
| <i>Ancistrops_strigilatus</i>    | 1 | 1 | 1 | 1 |
| <i>Andigena_cucullata</i>        | 1 | 1 | 1 | 1 |
| <i>Andigena_hypoglauca</i>       | 1 | 1 | 1 | 1 |
| <i>Andigena_laminirostris</i>    | 1 | 1 | 1 | 1 |
| <i>Androdon_aequatorialis</i>    | 1 | 1 | 1 | 1 |
| <i>Andropadus_ansorgei</i>       | 1 | 1 | 1 | 1 |
| <i>Andropadus_curvirostris</i>   | 1 | 1 | 1 | 1 |
| <i>Andropadus_gracilirostris</i> | 1 | 1 | 1 | 1 |
| <i>Andropadus_gracilis</i>       | 1 | 1 | 1 | 1 |
| <i>Andropadus_importunus</i>     | 1 | 1 | 1 | 1 |
| <i>Andropadus_latirostris</i>    | 1 | 1 | 1 | 1 |
| <i>Andropadus_masukuensis</i>    | 1 | 1 | 1 | 1 |
| <i>Andropadus_milanjensis</i>    | 1 | 1 | 1 | 1 |
| <i>Andropadus_montanus</i>       | 1 | 1 | 1 | 1 |
| <i>Andropadus_nigriceps</i>      | 1 | 1 | 1 | 1 |
| <i>Andropadus_tephrolaemus</i>   | 1 | 1 | 1 | 1 |
| <i>Andropadus_virens</i>         | 1 | 1 | 1 | 1 |
| <i>Anhima_cornuta</i>            | 1 | 1 | 1 | 1 |
| <i>Anhinga_anhinga</i>           | 1 | 1 | 1 | 1 |
| <i>Anhinga_novaehollandiae</i>   | 1 | 1 | 1 | 1 |
| <i>Anhinga_rufa</i>              | 1 | 1 | 1 | 1 |

|                                    |   |   |   |   |
|------------------------------------|---|---|---|---|
| <i>Anisognathus_igniventris</i>    | 1 | 1 | 1 | 1 |
| <i>Anisognathus_lacrymosus</i>     | 1 | 1 | 1 | 1 |
| <i>Anisognathus_melanogenys</i>    | 1 | 1 | 1 | 1 |
| <i>Anisognathus_notabilis</i>      | 1 | 1 | 1 | 1 |
| <i>Anisognathus_somptuosus</i>     | 1 | 1 | 1 | 1 |
| <i>Anodorhynchus_hyacinthinus</i>  | 1 | 1 | 1 | 1 |
| <i>Anodorhynchus_leari</i>         | 1 | 1 | 1 | 1 |
| <i>Anomalopteryx_didiformis</i>    | 1 | 1 | - | 1 |
| <i>Anomalospiza_imberbis</i>       | 1 | 1 | 1 | 1 |
| <i>Anorrhinus_austeni</i>          | 1 | 1 | 1 | 1 |
| <i>Anorrhinus_galeritus</i>        | 1 | 1 | 1 | 1 |
| <i>Anorrhinus_tickelli</i>         | 1 | 1 | 1 | 1 |
| <i>Anous_minutus</i>               | 1 | 1 | 1 | 1 |
| <i>Anous_stolidus</i>              | 1 | 1 | 1 | 1 |
| <i>Anous_tenuirostris</i>          | 1 | 1 | 1 | 1 |
| <i>Anser_albifrons</i>             | 1 | 1 | 1 | 1 |
| <i>Anser_anser</i>                 | 1 | 1 | 1 | 1 |
| <i>Anser_brachyrhynchus</i>        | 1 | 1 | 1 | 1 |
| <i>Anser_caerulescens</i>          | 1 | 1 | 1 | 1 |
| <i>Anser_canagica</i>              | 1 | 1 | 1 | 1 |
| <i>Anser_cygnoides</i>             | 1 | 1 | 1 | 1 |
| <i>Anser_erythropus</i>            | 1 | 1 | 1 | 1 |
| <i>Anser_fabalis</i>               | 1 | 1 | 1 | 1 |
| <i>Anser_indicus</i>               | 1 | 1 | 1 | 1 |
| <i>Anser_rossii</i>                | 1 | 1 | 1 | 1 |
| <i>Anseranas_semipalmata</i>       | 1 | 1 | 1 | 1 |
| <i>Anthocephala_floriceps</i>      | 1 | 1 | 1 | 1 |
| <i>Anthochaera_carunculata</i>     | 1 | 1 | 1 | 1 |
| <i>Anthochaera_chrysoptera</i>     | 1 | 1 | 1 | 1 |
| <i>Anthochaera_hunulata</i>        | 1 | 1 | 1 | 1 |
| <i>Anthochaera_paradoxa</i>        | 1 | 1 | 1 | 1 |
| <i>Anthornis_melanura</i>          | 1 | 1 | 1 | 1 |
| <i>Anthoscopus_minutus</i>         | 1 | 1 | 1 | 1 |
| <i>Anthoscopus_musculus</i>        | 1 | 1 | 1 | 1 |
| <i>Anthracoceros_albistrostris</i> | 1 | 1 | 1 | 1 |
| <i>Anthracoceros_malayanus</i>     | 1 | 1 | 1 | 1 |
| <i>Anthracothorax_dominicus</i>    | 1 | 1 | 1 | 1 |
| <i>Anthracothorax_mango</i>        | 1 | 1 | 1 | 1 |
| <i>Anthracothorax_nigricollis</i>  | 1 | 1 | 1 | 1 |
| <i>Anthracothorax_prevostii</i>    | 1 | 1 | 1 | 1 |
| <i>Anthracothorax_veraguensis</i>  | 1 | 1 | 1 | 1 |
| <i>Anthracothorax_viridigula</i>   | 1 | 1 | 1 | 1 |
| <i>Anthracothorax_viridis</i>      | 1 | 1 | 1 | 1 |
| <i>Anthreptes_collaris</i>         | 1 | 1 | 1 | 1 |

|                                |   |   |   |   |
|--------------------------------|---|---|---|---|
| <i>Anthreptes_fraseri</i>      | 1 | 1 | 1 | 1 |
| <i>Anthreptes_malacensis</i>   | 1 | 1 | 1 | 1 |
| <i>Anthreptes_orientalis</i>   | 1 | 1 | 1 | 1 |
| <i>Anthreptes_rectirostris</i> | 1 | 1 | 1 | 1 |
| <i>Anthropoides_paradiseus</i> | 1 | 1 | 1 | 1 |
| <i>Anthropoides_virgo</i>      | 1 | 1 | 1 | 1 |
| <i>Anthus_berthelotii</i>      | 1 | 1 | 1 | 1 |
| <i>Anthus_brachyurus</i>       | 1 | 1 | 1 | 1 |
| <i>Anthus_campestris</i>       | 1 | 1 | 1 | 1 |
| <i>Anthus_cervinus</i>         | 1 | 1 | 1 | 1 |
| <i>Anthus_cinnamomeus</i>      | 1 | 1 | 1 | 1 |
| <i>Anthus_correndera</i>       | 1 | 1 | 1 | 1 |
| <i>Anthus_furcatus</i>         | 1 | 1 | 1 | 1 |
| <i>Anthus_godlewskii</i>       | 1 | 1 | 1 | 1 |
| <i>Anthus_gustavi</i>          | 1 | 1 | 1 | 1 |
| <i>Anthus_hellmayri</i>        | 1 | 1 | 1 | 1 |
| <i>Anthus_hodgsoni</i>         | 1 | 1 | 1 | 1 |
| <i>Anthus_leucophrys</i>       | 1 | 1 | 1 | 1 |
| <i>Anthus_lineiventris</i>     | 1 | 1 | 1 | 1 |
| <i>Anthus_lutescens</i>        | 1 | 1 | 1 | 1 |
| <i>Anthus_petrosus</i>         | 1 | 1 | 1 | 1 |
| <i>Anthus_pratensis</i>        | 1 | 1 | 1 | 1 |
| <i>Anthus_richardi</i>         | 1 | 1 | 1 | 1 |
| <i>Anthus_rubescens</i>        | 1 | 1 | 1 | 1 |
| <i>Anthus_similis</i>          | 1 | 1 | 1 | 1 |
| <i>Anthus_spinoletta</i>       | 1 | 1 | 1 | 1 |
| <i>Anthus_spragueii</i>        | 1 | 1 | 1 | 1 |
| <i>Anthus_trivialis</i>        | 1 | 1 | 1 | 1 |
| <i>Anthus_vaalensis</i>        | 1 | 1 | 1 | 1 |
| <i>Antilophia_galeata</i>      | 1 | 1 | 1 | 1 |
| <i>Anumbius_annumbi</i>        | 1 | 1 | 1 | 1 |
| <i>Apalis_alticola</i>         | 1 | 1 | 1 | 1 |
| <i>Apalis_binotata</i>         | 1 | 1 | 1 | 1 |
| <i>Apalis_cinerea</i>          | 1 | 1 | 1 | 1 |
| <i>Apalis_flavida</i>          | 1 | 1 | 1 | 1 |
| <i>Apalis_jacksoni</i>         | 1 | 1 | 1 | 1 |
| <i>Apalis_melanocephala</i>    | 1 | 1 | 1 | 1 |
| <i>Apalis_porphyrolaema</i>    | 1 | 1 | 1 | 1 |
| <i>Apalis_pulchra</i>          | 1 | 1 | 1 | 1 |
| <i>Apalis_rufogularis</i>      | 1 | 1 | 1 | 1 |
| <i>Apalis_ruwenzorii</i>       | 1 | 1 | 1 | 1 |
| <i>Apalis_thoracica</i>        | 1 | 1 | 1 | 1 |
| <i>Apaloderma_aequatoriale</i> | 1 | 1 | 1 | 1 |
| <i>Apaloderma_narina</i>       | 1 | 1 | 1 | 1 |

|                                  |   |   |   |   |
|----------------------------------|---|---|---|---|
| <i>Apaloderma_vittatum</i>       | 1 | 1 | 1 | 1 |
| <i>Aphanotriccus_audax</i>       | 1 | 1 | 1 | 1 |
| <i>Aphantochroa_cirrochloris</i> | 1 | 1 | 1 | 1 |
| <i>Aphelocephala_leucopsis</i>   | 1 | 1 | 1 | 1 |
| <i>Aphelocephala_nigricincta</i> | 1 | 1 | 1 | 1 |
| <i>Aphelocoma_californica</i>    | 1 | 1 | 1 | 1 |
| <i>Aphelocoma_coerulescens</i>   | 1 | 1 | 1 | 1 |
| <i>Aphelocoma_insularis</i>      | 1 | 1 | 1 | 1 |
| <i>Aphelocoma_sumichrasti</i>    | 1 | 1 | 1 | 1 |
| <i>Aphelocoma_ultramarina</i>    | 1 | 1 | 1 | 1 |
| <i>Aphelocoma_unicolor</i>       | 1 | 1 | 1 | 1 |
| <i>Aphelocoma_wollweberi</i>     | 1 | 1 | 1 | 1 |
| <i>Aphelocoma_woodhouseii</i>    | 1 | 1 | 1 | 1 |
| <i>Aphrastura_spinicauda</i>     | 1 | 1 | 1 | 1 |
| <i>Aphriza_virgata</i>           | 1 | 1 | 1 | 1 |
| <i>Aphrodroma_brevirostris</i>   | 1 | 1 | 1 | 1 |
| <i>Aplonis_brunneicapillus</i>   | 1 | 1 | 1 | 1 |
| <i>Aplonis_cantoroides</i>       | 1 | 1 | 1 | 1 |
| <i>Aplonis_cinerascens</i>       | 1 | 1 | 1 | 1 |
| <i>Aplonis_grandis</i>           | 1 | 1 | 1 | 1 |
| <i>Aplonis_insularis</i>         | 1 | 1 | 1 | 1 |
| <i>Aplonis_metallica</i>         | 1 | 1 | 1 | 1 |
| <i>Aplonis_minor</i>             | 1 | 1 | 1 | 1 |
| <i>Aplonis_panayensis</i>        | 1 | 1 | 1 | 1 |
| <i>Aplonis_pelzelni</i>          | 1 | 1 | 1 | 1 |
| <i>Aplonis_tabuensis</i>         | 1 | 1 | 1 | 1 |
| <i>Aprosmictus_erythropterus</i> | 1 | 1 | 1 | 1 |
| <i>Aprosmictus_jonquillaceus</i> | 1 | 1 | 1 | 1 |
| <i>Aptenodytes_forsteri</i>      | 1 | 1 | 1 | 1 |
| <i>Aptenodytes_patagonicus</i>   | 1 | 1 | 1 | 1 |
| <i>Apteryx_australis</i>         | 1 | 1 | 0 | 1 |
| <i>Apteryx_haastii</i>           | 1 | 1 | 0 | 1 |
| <i>Apteryx_owenii</i>            | 1 | 1 | 0 | 1 |
| <i>Apteryx_rowi</i>              | 1 | 1 | 0 | 1 |
| <i>Aptornis_defossor</i>         | 1 | 1 | 1 | 1 |
| <i>Apus_affinis</i>              | 1 | 1 | 1 | 1 |
| <i>Apus_apus</i>                 | 1 | 1 | 1 | 1 |
| <i>Apus_nipalensis</i>           | 1 | 1 | 1 | 1 |
| <i>Apus_pacificus</i>            | 1 | 1 | 1 | 1 |
| <i>Aquila_adalberti</i>          | 1 | 1 | 1 | 1 |
| <i>Aquila_audax</i>              | 1 | 1 | 1 | 1 |
| <i>Aquila_chrysaetos</i>         | 1 | 1 | 1 | 1 |
| <i>Aquila_clanga</i>             | 1 | 1 | 1 | 1 |
| <i>Aquila_gurneyi</i>            | 1 | 1 | 1 | 1 |

|                                  |   |   |   |   |
|----------------------------------|---|---|---|---|
| <i>Aquila_heliaca</i>            | 1 | 1 | 1 | 1 |
| <i>Aquila_nipalensis</i>         | 1 | 1 | 1 | 1 |
| <i>Aquila_pomarina</i>           | 1 | 1 | 1 | 1 |
| <i>Aquila_rapax</i>              | 1 | 1 | 1 | 1 |
| <i>Aquila_verreauxii</i>         | 1 | 1 | 1 | 1 |
| <i>Ara_ararauna</i>              | 1 | 1 | 1 | 1 |
| <i>Ara_chloropterus</i>          | 1 | 1 | 1 | 1 |
| <i>Ara_glaucogularis</i>         | 1 | 1 | 1 | 1 |
| <i>Ara_macao</i>                 | 1 | 1 | 1 | 1 |
| <i>Ara_severus</i>               | 1 | 1 | 1 | 1 |
| <i>Arachnothera_affinis</i>      | 1 | 1 | 1 | 1 |
| <i>Arachnothera_chryso-genys</i> | 1 | 1 | 1 | 1 |
| <i>Arachnothera_longirostra</i>  | 1 | 1 | 1 | 1 |
| <i>Arachnothera_magna</i>        | 1 | 1 | 1 | 1 |
| <i>Arachnothera_robusta</i>      | 1 | 1 | 1 | 1 |
| <i>Aramides_cajanea</i>          | 1 | 1 | 1 | 1 |
| <i>Aramides_ypecaha</i>          | 1 | 1 | 1 | 1 |
| <i>Aramus_guarauna</i>           | 1 | 1 | 1 | 1 |
| <i>Aratinga_acuticaudata</i>     | 1 | 1 | 1 | 1 |
| <i>Aratinga_aurea</i>            | 1 | 1 | 1 | 1 |
| <i>Aratinga_auricapillus</i>     | 1 | 1 | 1 | 1 |
| <i>Aratinga_cactorum</i>         | 1 | 1 | 1 | 1 |
| <i>Aratinga_jandaya</i>          | 1 | 1 | 1 | 1 |
| <i>Aratinga_leucophthalma</i>    | 1 | 1 | 1 | 1 |
| <i>Aratinga_mitrata</i>          | 1 | 1 | 1 | 1 |
| <i>Aratinga_nana</i>             | 1 | 1 | 1 | 1 |
| <i>Aratinga_pertinax</i>         | 1 | 1 | 1 | 1 |
| <i>Aratinga_solstitialis</i>     | 1 | 1 | 1 | 1 |
| <i>Aratinga_weddellii</i>        | 1 | 1 | 1 | 1 |
| <i>Arborophila_gingica</i>       | 1 | 1 | 1 | 1 |
| <i>Arborophila_javanica</i>      | 1 | 1 | 1 | 1 |
| <i>Arborophila_rufipectus</i>    | 1 | 1 | 1 | 1 |
| <i>Arborophila_rufogularis</i>   | 1 | 1 | 1 | 1 |
| <i>Arborophila_torqueola</i>     | 1 | 1 | 1 | 1 |
| <i>Archboldia_papuensis</i>      | 1 | 1 | 1 | 1 |
| <i>Archilochus_alexandri</i>     | 1 | 1 | 1 | 1 |
| <i>Archilochus_colubris</i>      | 1 | 1 | 1 | 1 |
| <i>Ardea_alba</i>                | 1 | 1 | 1 | 1 |
| <i>Ardea_cinerea</i>             | 1 | 1 | 1 | 1 |
| <i>Ardea_cocoi</i>               | 1 | 1 | 1 | 1 |
| <i>Ardea_herodias</i>            | 1 | 1 | 1 | 1 |
| <i>Ardea_novaehollandiae</i>     | 1 | 1 | 1 | 1 |
| <i>Ardea_pacifica</i>            | 1 | 1 | 1 | 1 |
| <i>Ardeola_bacchus</i>           | 1 | 1 | 1 | 1 |



|                                  |   |   |   |   |
|----------------------------------|---|---|---|---|
| <i>Ardeola_ralloides</i>         | 1 | 1 | 1 | 1 |
| <i>Ardeotis_arabs</i>            | 1 | 1 | 1 | 1 |
| <i>Ardeotis_kori</i>             | 1 | 1 | 1 | 1 |
| <i>Ardeotis_nigriceps</i>        | 1 | 1 | 1 | 1 |
| <i>Arenaria_interpres</i>        | 1 | 1 | 1 | 1 |
| <i>Arenaria_melanocephala</i>    | 1 | 1 | 1 | 1 |
| <i>Argusianus_argus</i>          | 1 | 1 | 1 | 1 |
| <i>Arremon_aurantiistrostris</i> | 1 | 1 | 1 | 1 |
| <i>Arremon_castaneiceps</i>      | 1 | 1 | 1 | 1 |
| <i>Arremon_flavistrostris</i>    | 1 | 1 | 1 | 1 |
| <i>Arremon_schlegeli</i>         | 1 | 1 | 1 | 1 |
| <i>Arremonops_chloronotus</i>    | 1 | 1 | 1 | 1 |
| <i>Arremonops_conirostris</i>    | 1 | 1 | 1 | 1 |
| <i>Arremonops_rufivirgatus</i>   | 1 | 1 | 1 | 1 |
| <i>Arses_telescopthalmus</i>     | 1 | 1 | 1 | 1 |
| <i>Artamella_yiridis</i>         | 1 | 1 | 1 | 1 |
| <i>Artamus_cinereus</i>          | 1 | 1 | 1 | 1 |
| <i>Artamus_cyanopterus</i>       | 1 | 1 | 1 | 1 |
| <i>Artamus_leucorhynchus</i>     | 1 | 1 | 1 | 1 |
| <i>Artamus_minor</i>             | 1 | 1 | 1 | 1 |
| <i>Artamus_personatus</i>        | 1 | 1 | 1 | 1 |
| <i>Artamus_superciliosus</i>     | 1 | 1 | 1 | 1 |
| <i>Artisornis_metopias</i>       | 1 | 1 | 1 | 1 |
| <i>Arundinicola_leucocephala</i> | 1 | 1 | 1 | 1 |
| <i>Asarcornis_scutulata</i>      | 1 | 1 | 1 | 1 |
| <i>Ashbyia_lovensis</i>          | 1 | 1 | 1 | 1 |
| <i>Asio_capensis</i>             | 1 | 1 | 1 | 1 |
| <i>Asio_flammeus</i>             | 1 | 1 | 1 | 1 |
| <i>Asio_otus</i>                 | 1 | 1 | 1 | 1 |
| <i>Asthenes_anthoides</i>        | 1 | 1 | 1 | 1 |
| <i>Asthenes_baeri</i>            | 1 | 1 | 1 | 1 |
| <i>Asthenes_cactorum</i>         | 1 | 1 | 1 | 1 |
| <i>Asthenes_dorbignyi</i>        | 1 | 1 | 1 | 1 |
| <i>Asthenes_flammulata</i>       | 1 | 1 | 1 | 1 |
| <i>Asthenes_humicola</i>         | 1 | 1 | 1 | 1 |
| <i>Asthenes_humilis</i>          | 1 | 1 | 1 | 1 |
| <i>Asthenes_modesta</i>          | 1 | 1 | 1 | 1 |
| <i>Asthenes_ottonis</i>          | 1 | 1 | 1 | 1 |
| <i>Asthenes_patagonica</i>       | 1 | 1 | 1 | 1 |
| <i>Asthenes_pudibunda</i>        | 1 | 1 | 1 | 1 |
| <i>Asthenes_pyrrholeuca</i>      | 1 | 1 | 1 | 1 |
| <i>Asthenes_sclateri</i>         | 1 | 1 | 1 | 1 |
| <i>Asthenes_steinbachi</i>       | 1 | 1 | 1 | 1 |
| <i>Asthenes_urubambensis</i>     | 1 | 1 | 1 | 1 |

|                                       |   |   |   |   |
|---------------------------------------|---|---|---|---|
| <i>Asthenes_wyatti</i>                | 1 | 1 | 1 | 1 |
| <i>Astrapia_mayeri</i>                | 1 | 1 | 1 | 1 |
| <i>Astrapia_nigra</i>                 | 1 | 1 | 1 | 1 |
| <i>Astrapia_rothschildi</i>           | 1 | 1 | 1 | 1 |
| <i>Astrapia_splendidissima</i>        | 1 | 1 | 1 | 1 |
| <i>Astrapia_stephaniae</i>            | 1 | 1 | 1 | 1 |
| <i>Atalotriccus_pilaris</i>           | 1 | 1 | 1 | 1 |
| <i>Atelornis_crossleyi</i>            | 1 | 1 | 1 | 1 |
| <i>Atelornis_pittoides</i>            | 1 | 1 | 1 | 1 |
| <i>Athene_brama</i>                   | 1 | 1 | 1 | 1 |
| <i>Athene_cunicularia</i>             | 1 | 1 | 1 | 1 |
| <i>Athene_noctua</i>                  | 1 | 1 | 1 | 1 |
| <i>Atlapetes_albinucha</i>            | 1 | 1 | 1 | 1 |
| <i>Atlapetes_citrinellus</i>          | 1 | 1 | 1 | 1 |
| <i>Atlapetes_fulviceps</i>            | 1 | 1 | 1 | 1 |
| <i>Atlapetes_melanops</i>             | 1 | 1 | 1 | 1 |
| <i>Atlapetes_pileatus</i>             | 1 | 1 | 1 | 1 |
| <i>Atlapetes_rufigenis</i>            | 1 | 1 | 1 | 1 |
| <i>Atlapetes_rufinucha</i>            | 1 | 1 | 1 | 1 |
| <i>Atlapetes_schistaceus</i>          | 1 | 1 | 1 | 1 |
| <i>Atlapetes_tricolor</i>             | 1 | 1 | 1 | 1 |
| <i>Atrichornis_clamosus</i>           | 1 | 1 | 1 | 1 |
| <i>Attagis_gayi</i>                   | 1 | 1 | 1 | 1 |
| <i>Attagis_malouinus</i>              | 1 | 1 | 1 | 1 |
| <i>Atthis_heloisa</i>                 | 1 | 1 | 1 | 1 |
| <i>Atticora_fasciata</i>              | 1 | 1 | 1 | 1 |
| <i>Atticora_melanoleuca</i>           | 1 | 1 | 1 | 1 |
| <i>Attila_citriniventris</i>          | 1 | 1 | 1 | 1 |
| <i>Attila_phoenicurus</i>             | 1 | 1 | 1 | 1 |
| <i>Attila_rufus</i>                   | 1 | 1 | 1 | 1 |
| <i>Attila_spadiceus</i>               | 1 | 1 | 1 | 1 |
| <i>Attila_torridus</i>                | 1 | 1 | 1 | 1 |
| <i>Aulacorhynchus_coeruleicinctis</i> | 1 | 1 | 1 | 1 |
| <i>Aulacorhynchus_derbianus</i>       | 1 | 1 | 1 | 1 |
| <i>Aulacorhynchus_haematopygus</i>    | 1 | 1 | 1 | 1 |
| <i>Aulacorhynchus_prasinus</i>        | 1 | 1 | 1 | 1 |
| <i>Aulacorhynchus_sulcatus</i>        | 1 | 1 | 1 | 1 |
| <i>Auriparus_flaviceps</i>            | 1 | 1 | 1 | 1 |
| <i>Automolus_infuscatus</i>           | 1 | 1 | 1 | 1 |
| <i>Automolus_leucophthalmus</i>       | 1 | 1 | 1 | 1 |
| <i>Automolus_melanopezus</i>          | 1 | 1 | 1 | 1 |
| <i>Automolus_ochrolaemus</i>          | 1 | 1 | 1 | 1 |
| <i>Automolus_rubiginosus</i>          | 1 | 1 | 1 | 1 |
| <i>Automolus_rufipileatus</i>         | 1 | 1 | 1 | 1 |

|                                    |   |   |   |   |
|------------------------------------|---|---|---|---|
| <i>Aviceda cuculoides</i>          | 1 | 1 | 1 | 1 |
| <i>Aviceda subcristata</i>         | 1 | 1 | 1 | 1 |
| <i>Avocettula recurvirostris</i>   | 1 | 1 | 1 | 1 |
| <i>Aythya affinis</i>              | 1 | 1 | 1 | 1 |
| <i>Aythya americana</i>            | 1 | 1 | 1 | 1 |
| <i>Aythya australis</i>            | 1 | 1 | 1 | 1 |
| <i>Aythya collaris</i>             | 1 | 1 | 1 | 1 |
| <i>Aythya ferina</i>               | 1 | 1 | 1 | 1 |
| <i>Aythya fuligula</i>             | 1 | 1 | 1 | 1 |
| <i>Aythya marila</i>               | 1 | 1 | 1 | 1 |
| <i>Aythya nyroca</i>               | 1 | 1 | 1 | 1 |
| <i>Aythya valisineria</i>          | 1 | 1 | 1 | 1 |
| <i>Babax lanceolatus</i>           | 1 | 1 | 1 | 1 |
| <i>Baeolophus atricristatus</i>    | 1 | 1 | 1 | 1 |
| <i>Baeolophus bicolor</i>          | 1 | 1 | 1 | 1 |
| <i>Baeolophus inornatus</i>        | 1 | 1 | 1 | 1 |
| <i>Baeolophus ridgwayi</i>         | 1 | 1 | 1 | 1 |
| <i>Baeolophus wollweberi</i>       | 1 | 1 | 1 | 1 |
| <i>Baeopogon clamans</i>           | 1 | 1 | 1 | 1 |
| <i>Baeopogon indicator</i>         | 1 | 1 | 1 | 1 |
| <i>Baillonius bailloni</i>         | 1 | 1 | 1 | 1 |
| <i>Balaeniceps rex</i>             | 1 | 1 | 1 | 1 |
| <i>Balearica pavonina</i>          | 1 | 1 | 1 | 1 |
| <i>Balearica regulorum</i>         | 1 | 1 | 1 | 1 |
| <i>Bambusicola fytchii</i>         | 1 | 1 | 1 | 1 |
| <i>Bambusicola thoracica</i>       | 1 | 1 | 1 | 1 |
| <i>Bangsia arcae</i>               | 1 | 1 | 1 | 1 |
| <i>Bangsia aureocincta</i>         | 1 | 1 | 1 | 1 |
| <i>Bangsia edwardsi</i>            | 1 | 1 | 1 | 1 |
| <i>Bangsia melanochlamys</i>       | 1 | 1 | 1 | 1 |
| <i>Bangsia rothschildi</i>         | 1 | 1 | 1 | 1 |
| <i>Barnardius zonarius</i>         | 1 | 1 | 1 | 1 |
| <i>Bartramia longicauda</i>        | 1 | 1 | 1 | 1 |
| <i>Baryphthengus martii</i>        | 1 | 1 | 1 | 1 |
| <i>Baryphthengus ruficapillus</i>  | 1 | 1 | 1 | 1 |
| <i>Basileuterus basilicus</i>      | 1 | 1 | 1 | 1 |
| <i>Basileuterus belli</i>          | 1 | 1 | 1 | 1 |
| <i>Basileuterus bivittatus</i>     | 1 | 1 | 1 | 1 |
| <i>Basileuterus chrysogaster</i>   | 1 | 1 | 1 | 1 |
| <i>Basileuterus cinereicollis</i>  | 1 | 1 | 1 | 1 |
| <i>Basileuterus conspicillatus</i> | 1 | 1 | 1 | 1 |
| <i>Basileuterus coronatus</i>      | 1 | 1 | 1 | 1 |
| <i>Basileuterus culicivorus</i>    | 1 | 1 | 1 | 1 |
| <i>Basileuterus flaveolus</i>      | 1 | 1 | 1 | 1 |

|                                    |   |   |   |   |
|------------------------------------|---|---|---|---|
| <i>Basileuterus_fraseri</i>        | 1 | 1 | 1 | 1 |
| <i>Basileuterus_hypoleucus</i>     | 1 | 1 | 1 | 1 |
| <i>Basileuterus_lachrymosus</i>    | 1 | 1 | 1 | 1 |
| <i>Basileuterus_leucoblepharus</i> | 1 | 1 | 1 | 1 |
| <i>Basileuterus_leucophrys</i>     | 1 | 1 | 1 | 1 |
| <i>Basileuterus_luteoviridis</i>   | 1 | 1 | 1 | 1 |
| <i>Basileuterus_melanogenys</i>    | 1 | 1 | 1 | 1 |
| <i>Basileuterus_nigrocristatus</i> | 1 | 1 | 1 | 1 |
| <i>Basileuterus_rivularis</i>      | 1 | 1 | 1 | 1 |
| <i>Basileuterus_rufifrons</i>      | 1 | 1 | 1 | 1 |
| <i>Basileuterus_signatus</i>       | 1 | 1 | 1 | 1 |
| <i>Basileuterus_trifasciatus</i>   | 1 | 1 | 1 | 1 |
| <i>Basileuterus_tristriatus</i>    | 1 | 1 | 1 | 1 |
| <i>Basilornis_celebensis</i>       | 1 | 1 | 1 | 1 |
| <i>Basilornis_mirandus</i>         | 1 | 1 | 1 | 1 |
| <i>Batara_cinerea</i>              | 1 | 1 | 1 | 1 |
| <i>Bathmocercus_cerviniventris</i> | 1 | 1 | 1 | 1 |
| <i>Bathmocercus_rufus</i>          | 1 | 1 | 1 | 1 |
| <i>Batis_capensis</i>              | 1 | 1 | 1 | 1 |
| <i>Batis_diops</i>                 | 1 | 1 | 1 | 1 |
| <i>Batis_minor</i>                 | 1 | 1 | 1 | 1 |
| <i>Batis_mixta</i>                 | 1 | 1 | 1 | 1 |
| <i>Batis_molitor</i>               | 1 | 1 | 1 | 1 |
| <i>Batis_poensis</i>               | 1 | 1 | 1 | 1 |
| <i>Batis_pirit</i>                 | 1 | 1 | 1 | 1 |
| <i>Batis_soror</i>                 | 1 | 1 | 1 | 1 |
| <i>Batrachostomus_auritus</i>      | 1 | 1 | 1 | 1 |
| <i>Batrachostomus_cornutus</i>     | 1 | 1 | 1 | 1 |
| <i>Batrachostomus_septimus</i>     | 1 | 1 | 1 | 1 |
| <i>Berenicornis_comatus</i>        | 1 | 1 | 1 | 1 |
| <i>Berlepschia_rikeri</i>          | 1 | 1 | 1 | 1 |
| <i>Bernieria_madagascariensis</i>  | 1 | 1 | 1 | 1 |
| <i>Bias_flammulatus</i>            | 1 | 1 | 1 | 1 |
| <i>Bias_musicus</i>                | 1 | 1 | 1 | 1 |
| <i>Biziura_lobata</i>              | 1 | 1 | 1 | 1 |
| <i>Bleda_canicapillus</i>          | 1 | 1 | 1 | 1 |
| <i>Bleda_eximius</i>               | 1 | 1 | 1 | 1 |
| <i>Bleda_notatus</i>               | 1 | 1 | 1 | 1 |
| <i>Bleda_syndactylus</i>           | 1 | 1 | 1 | 1 |
| <i>Blythipicus_pyrrhotis</i>       | 1 | 1 | 1 | 1 |
| <i>Blythipicus_rubiginosus</i>     | 1 | 1 | 1 | 1 |
| <i>Boissonneaua_flavescens</i>     | 1 | 1 | 1 | 1 |
| <i>Boissonneaua_matthewsii</i>     | 1 | 1 | 1 | 1 |
| <i>Bolbopsittacus_lunulatus</i>    | 1 | 1 | 1 | 1 |

|                                   |   |   |   |   |
|-----------------------------------|---|---|---|---|
| <i>Bolborhynchus_aymara</i>       | 1 | 1 | 1 | 1 |
| <i>Bolborhynchus_lineola</i>      | 1 | 1 | 1 | 1 |
| <i>Bombycilla_cedrorum</i>        | 1 | 1 | 1 | 1 |
| <i>Bombycilla_garrulus</i>        | 1 | 1 | 1 | 1 |
| <i>Bombycilla_japonica</i>        | 1 | 1 | 1 | 1 |
| <i>Bonasa_umbellus</i>            | 1 | 1 | 1 | 1 |
| <i>Botaurus_lentiginosus</i>      | 1 | 1 | 1 | 1 |
| <i>Botaurus_pinnatus</i>          | 1 | 1 | 1 | 1 |
| <i>Botaurus_stellaris</i>         | 1 | 1 | 1 | 1 |
| <i>Brachypteracias_leptosomus</i> | 1 | 1 | 1 | 1 |
| <i>Brachypteracias_squamigera</i> | 1 | 1 | 1 | 1 |
| <i>Brachypteryx_leucophrys</i>    | 1 | 1 | 1 | 1 |
| <i>Brachypteryx_montana</i>       | 1 | 1 | 1 | 1 |
| <i>Brachyramphus_brevirostris</i> | 1 | 1 | 1 | 1 |
| <i>Brachyramphus_marmoratus</i>   | 1 | 1 | 1 | 1 |
| <i>Brachyramphus_perdix</i>       | 1 | 1 | 1 | 1 |
| <i>Bradornis_infuscatus</i>       | 1 | 1 | 1 | 1 |
| <i>Bradornis_mariquensis</i>      | 1 | 1 | 1 | 1 |
| <i>Bradornis_microrhynchus</i>    | 1 | 1 | 1 | 1 |
| <i>Bradypterus_baboecala</i>      | 1 | 1 | 1 | 1 |
| <i>Bradypterus_bangwaensis</i>    | 1 | 1 | 1 | 1 |
| <i>Bradypterus_barrattii</i>      | 1 | 1 | 1 | 1 |
| <i>Bradypterus_carpalis</i>       | 1 | 1 | 1 | 1 |
| <i>Bradypterus_castaneus</i>      | 1 | 1 | 1 | 1 |
| <i>Bradypterus_cinnamomeus</i>    | 1 | 1 | 1 | 1 |
| <i>Bradypterus_davidi</i>         | 1 | 1 | 1 | 1 |
| <i>Bradypterus_lopesi</i>         | 1 | 1 | 1 | 1 |
| <i>Bradypterus_mandelli</i>       | 1 | 1 | 1 | 1 |
| <i>Bradypterus_montis</i>         | 1 | 1 | 1 | 1 |
| <i>Bradypterus_sylvaticus</i>     | 1 | 1 | 1 | 1 |
| <i>Bradypterus_tacsanowskius</i>  | 1 | 1 | 1 | 1 |
| <i>Bradypterus_thoracicus</i>     | 1 | 1 | 1 | 1 |
| <i>Bradypterus_victorini</i>      | 1 | 1 | 1 | 1 |
| <i>Branta_bernicle</i>            | 1 | 1 | 1 | 1 |
| <i>Branta_canadensis</i>          | 1 | 1 | 1 | 1 |
| <i>Branta_hutchinsii</i>          | 1 | 1 | 1 | 1 |
| <i>Branta_leucopsis</i>           | 1 | 1 | 1 | 1 |
| <i>Branta_ruficollis</i>          | 1 | 1 | 1 | 1 |
| <i>Branta_sandvicensis</i>        | 1 | 1 | 1 | 1 |
| <i>Brotogeris_chiriri</i>         | 1 | 1 | 1 | 1 |
| <i>Brotogeris_chrysoptera</i>     | 1 | 1 | 1 | 1 |
| <i>Brotogeris_cyanoptera</i>      | 1 | 1 | 1 | 1 |
| <i>Brotogeris_jugularis</i>       | 1 | 1 | 1 | 1 |
| <i>Brotogeris_pyrrhopterus</i>    | 1 | 1 | 1 | 1 |

|                                 |   |   |   |   |
|---------------------------------|---|---|---|---|
| <i>Brotogeris_sanctithomae</i>  | 1 | 1 | 1 | 1 |
| <i>Brotogeris_tirica</i>        | 1 | 1 | 1 | 1 |
| <i>Brotogeris_versicolorus</i>  | 1 | 1 | 1 | 1 |
| <i>Buarremon_brunneinucha</i>   | 1 | 1 | 1 | 1 |
| <i>Buarremon_torquatus</i>      | 1 | 1 | 1 | 1 |
| <i>Bubalornis_albistrois</i>    | 1 | 1 | 1 | 1 |
| <i>Bubalornis_niger</i>         | 1 | 1 | 1 | 1 |
| <i>Bubo_africanus</i>           | 1 | 1 | 1 | 1 |
| <i>Bubo_ascalaphus</i>          | 1 | 1 | 1 | 1 |
| <i>Bubo_bengalensis</i>         | 1 | 1 | 1 | 1 |
| <i>Bubo_bubo</i>                | 1 | 1 | 1 | 1 |
| <i>Bubo_capensis</i>            | 1 | 1 | 1 | 1 |
| <i>Bubo_lacteus</i>             | 1 | 1 | 1 | 1 |
| <i>Bubo_magellanicus</i>        | 1 | 1 | 1 | 1 |
| <i>Bubo_nipalensis</i>          | 1 | 1 | 1 | 1 |
| <i>Bubo_scandiacus</i>          | 1 | 1 | 1 | 1 |
| <i>Bubo_virginianus</i>         | 1 | 1 | 1 | 1 |
| <i>Bubulcus_ibis</i>            | 1 | 1 | 1 | 1 |
| <i>Bucanetes_githagineus</i>    | 1 | 1 | 1 | 1 |
| <i>Buccanodon_duchailui</i>     | 1 | 1 | 1 | 1 |
| <i>Bucco_capensis</i>           | 1 | 1 | 1 | 1 |
| <i>Bucco_macroductylus</i>      | 1 | 1 | 1 | 1 |
| <i>Bucephala_albeola</i>        | 1 | 1 | 1 | 1 |
| <i>Bucephala_clangula</i>       | 1 | 1 | 1 | 1 |
| <i>Bucephala_islandica</i>      | 1 | 1 | 1 | 1 |
| <i>Buceros_bicornis</i>         | 1 | 1 | 1 | 1 |
| <i>Buceros_rhinoceros</i>       | 1 | 1 | 1 | 1 |
| <i>Bucorvus_abyssinicus</i>     | 1 | 1 | 1 | 1 |
| <i>Bucorvus_leadbeateri</i>     | 1 | 1 | 1 | 1 |
| <i>Bulweria_bulwerii</i>        | 1 | 1 | 1 | 1 |
| <i>Buphagus_africanus</i>       | 1 | 1 | 1 | 1 |
| <i>Buphagus_erythrorhynchus</i> | 1 | 1 | 1 | 1 |
| <i>Burhinus_bistriatus</i>      | 1 | 1 | 1 | 1 |
| <i>Burhinus_capensis</i>        | 1 | 1 | 1 | 1 |
| <i>Burhinus_grallarius</i>      | 1 | 1 | 1 | 1 |
| <i>Burhinus_oedicnemus</i>      | 1 | 1 | 1 | 1 |
| <i>Burhinus_senegalensis</i>    | 1 | 1 | 1 | 1 |
| <i>Burhinus_superciliaris</i>   | 1 | 1 | 1 | 1 |
| <i>Burhinus_vermiculatus</i>    | 1 | 1 | 1 | 1 |
| <i>Busarellus_nigricollis</i>   | 1 | 1 | 1 | 1 |
| <i>Butastur_indicus</i>         | 1 | 1 | 1 | 1 |
| <i>Butastur_rufipennis</i>      | 1 | 1 | 1 | 1 |
| <i>Butastur_teesa</i>           | 1 | 1 | 1 | 1 |
| <i>Buteo_albicaudatus</i>       | 1 | 1 | 1 | 1 |

|                                   |   |   |   |   |
|-----------------------------------|---|---|---|---|
| <i>Buteo_albigula</i>             | 1 | 1 | 1 | 1 |
| <i>Buteo_albonotatus</i>          | 1 | 1 | 1 | 1 |
| <i>Buteo_augur</i>                | 1 | 1 | 1 | 1 |
| <i>Buteo_brachyurus</i>           | 1 | 1 | 1 | 1 |
| <i>Buteo_buteo</i>                | 1 | 1 | 1 | 1 |
| <i>Buteo_galapagoensis</i>        | 1 | 1 | 1 | 1 |
| <i>Buteo_hemilasius</i>           | 1 | 1 | 1 | 1 |
| <i>Buteo_jamaicensis</i>          | 1 | 1 | 1 | 1 |
| <i>Buteo_lagopus</i>              | 1 | 1 | 1 | 1 |
| <i>Buteo_leucorrhous</i>          | 1 | 1 | 1 | 1 |
| <i>Buteo_lineatus</i>             | 1 | 1 | 1 | 1 |
| <i>Buteo_magnirostris</i>         | 1 | 1 | 1 | 1 |
| <i>Buteo_nitidus</i>              | 1 | 1 | 1 | 1 |
| <i>Buteo_oreophilus</i>           | 1 | 1 | 1 | 1 |
| <i>Buteo_platypterus</i>          | 1 | 1 | 1 | 1 |
| <i>Buteo_polyosoma</i>            | 1 | 1 | 1 | 1 |
| <i>Buteo_regalis</i>              | 1 | 1 | 1 | 1 |
| <i>Buteo_ridgwayi</i>             | 1 | 1 | 1 | 1 |
| <i>Buteo_rufinus</i>              | 1 | 1 | 1 | 1 |
| <i>Buteo_rufofuscus</i>           | 1 | 1 | 1 | 1 |
| <i>Buteo_solitarius</i>           | 1 | 1 | 1 | 1 |
| <i>Buteo_swainsoni</i>            | 1 | 1 | 1 | 1 |
| <i>Buteogallus_aequinoctialis</i> | 1 | 1 | 1 | 1 |
| <i>Buteogallus_anthracinus</i>    | 1 | 1 | 1 | 1 |
| <i>Buteogallus_meridionalis</i>   | 1 | 1 | 1 | 1 |
| <i>Buteogallus_urubitinga</i>     | 1 | 1 | 1 | 1 |
| <i>Buthraupis_aureodorsalis</i>   | 1 | 1 | 1 | 1 |
| <i>Buthraupis_eximia</i>          | 1 | 1 | 1 | 1 |
| <i>Buthraupis_montana</i>         | 1 | 1 | 1 | 1 |
| <i>Buthraupis_wetmorei</i>        | 1 | 1 | 1 | 1 |
| <i>Butorides_striata</i>          | 1 | 1 | 1 | 1 |
| <i>Butorides_virescens</i>        | 1 | 1 | 1 | 1 |
| <i>Bycanistes_brevis</i>          | 1 | 1 | 1 | 1 |
| <i>Bycanistes_bucinator</i>       | 1 | 1 | 1 | 1 |
| <i>Bycanistes_subcylindricus</i>  | 1 | 1 | 1 | 1 |
| <i>Cacatua_alba</i>               | 1 | 1 | 1 | 1 |
| <i>Cacatua_ducorpsii</i>          | 1 | 1 | 1 | 1 |
| <i>Cacatua_galerita</i>           | 1 | 1 | 1 | 1 |
| <i>Cacatua_goffini</i>            | 1 | 1 | 1 | 1 |
| <i>Cacatua_haematuropygia</i>     | 1 | 1 | 1 | 1 |
| <i>Cacatua_leadbeateri</i>        | 1 | 1 | 1 | 1 |
| <i>Cacatua_moluccensis</i>        | 1 | 1 | 1 | 1 |
| <i>Cacatua_ophthalmica</i>        | 1 | 1 | 1 | 1 |
| <i>Cacatua_pastinator</i>         | 1 | 1 | 1 | 1 |

|                                     |   |   |   |   |
|-------------------------------------|---|---|---|---|
| <i>Cacatua_sanguinea</i>            | 1 | 1 | 1 | 1 |
| <i>Cacatua_sulphurea</i>            | 1 | 1 | 1 | 1 |
| <i>Cacicus_cela</i>                 | 1 | 1 | 1 | 1 |
| <i>Cacicus_chrysonotus</i>          | 1 | 1 | 1 | 1 |
| <i>Cacicus_chrysopterus</i>         | 1 | 1 | 1 | 1 |
| <i>Cacicus_haemorrhous</i>          | 1 | 1 | 1 | 1 |
| <i>Cacicus_leucoramphus</i>         | 1 | 1 | 1 | 1 |
| <i>Cacicus_melanicterus</i>         | 1 | 1 | 1 | 1 |
| <i>Cacicus_sclateri</i>             | 1 | 1 | 1 | 1 |
| <i>Cacicus_solitarius</i>           | 1 | 1 | 1 | 1 |
| <i>Cacicus_uropygialis</i>          | 1 | 1 | 1 | 1 |
| <i>Cacomantis_flabelliformis</i>    | 1 | 1 | 1 | 1 |
| <i>Cacomantis_merulinus</i>         | 1 | 1 | 1 | 1 |
| <i>Cacomantis_variolosus</i>        | 1 | 1 | 1 | 1 |
| <i>Cactospiza_heliobates</i>        | 1 | 1 | 1 | 1 |
| <i>Cactospiza_pallida</i>           | 1 | 1 | 1 | 1 |
| <i>Cairina_moschata</i>             | 1 | 1 | 1 | 1 |
| <i>Calamanthus_campestris</i>       | 1 | 1 | 1 | 1 |
| <i>Calamanthus_cautus</i>           | 1 | 1 | 1 | 1 |
| <i>Calamanthus_fuliginosus</i>      | 1 | 1 | 1 | 1 |
| <i>Calamanthus_pyrrhopygius</i>     | 1 | 1 | 1 | 1 |
| <i>Calamonastes_simplex</i>         | 1 | 1 | 1 | 1 |
| <i>Calamospiza_melanocorys</i>      | 1 | 1 | 1 | 1 |
| <i>Calandrella_acutirostris</i>     | 1 | 1 | 1 | 1 |
| <i>Calandrella_brachydactyla</i>    | 1 | 1 | 1 | 1 |
| <i>Calandrella_cheleensis</i>       | 1 | 1 | 1 | 1 |
| <i>Calandrella_rufescens</i>        | 1 | 1 | 1 | 1 |
| <i>Calcarius_lapponicus</i>         | 1 | 1 | 1 | 1 |
| <i>Calcarius_mccownii</i>           | 1 | 1 | 1 | 1 |
| <i>Calcarius_ornatus</i>            | 1 | 1 | 1 | 1 |
| <i>Calcarius_pictus</i>             | 1 | 1 | 1 | 1 |
| <i>Calicalicus_madagascariensis</i> | 1 | 1 | 1 | 1 |
| <i>Calicalicus_rufocarpalis</i>     | 1 | 1 | 1 | 1 |
| <i>Calidris_alba</i>                | 1 | 1 | 1 | 1 |
| <i>Calidris_alpina</i>              | 1 | 1 | 1 | 1 |
| <i>Calidris_bairdii</i>             | 1 | 1 | 1 | 1 |
| <i>Calidris_canutus</i>             | 1 | 1 | 1 | 1 |
| <i>Calidris_ferruginea</i>          | 1 | 1 | 1 | 1 |
| <i>Calidris_fuscicollis</i>         | 1 | 1 | 1 | 1 |
| <i>Calidris_maritima</i>            | 1 | 1 | 1 | 1 |
| <i>Calidris_mauri</i>               | 1 | 1 | 1 | 1 |
| <i>Calidris_melanotos</i>           | 1 | 1 | 1 | 1 |
| <i>Calidris_minuta</i>              | 1 | 1 | 1 | 1 |
| <i>Calidris_minutilla</i>           | 1 | 1 | 1 | 1 |



|                                    |   |   |   |   |
|------------------------------------|---|---|---|---|
| <i>Calidris_ptilocnemis</i>        | 1 | 1 | 1 | 1 |
| <i>Calidris_pusilla</i>            | 1 | 1 | 1 | 1 |
| <i>Calidris_ruficollis</i>         | 1 | 1 | 1 | 1 |
| <i>Calidris_subminuta</i>          | 1 | 1 | 1 | 1 |
| <i>Calidris_temminckii</i>         | 1 | 1 | 1 | 1 |
| <i>Calidris_tenuirostris</i>       | 1 | 1 | 1 | 1 |
| <i>Callaeas_cinerea</i>            | 1 | 1 | 1 | 1 |
| <i>Callipepla_californica</i>      | 1 | 1 | 1 | 1 |
| <i>Callipepla_douglasii</i>        | 1 | 1 | 1 | 1 |
| <i>Callipepla_gambelii</i>         | 1 | 1 | 1 | 1 |
| <i>Callipepla_squamata</i>         | 1 | 1 | 1 | 1 |
| <i>Calliphlox_amethystina</i>      | 1 | 1 | 1 | 1 |
| <i>Calliphlox_bryantae</i>         | 1 | 1 | 1 | 1 |
| <i>Calliphlox_mitchellii</i>       | 1 | 1 | 1 | 1 |
| <i>Callocephalon_fimbriatum</i>    | 1 | 1 | 1 | 1 |
| <i>Callonetta_leucophrys</i>       | 1 | 1 | 1 | 1 |
| <i>Calochaetes_coccineus</i>       | 1 | 1 | 1 | 1 |
| <i>Calocitta_colliei</i>           | 1 | 1 | 1 | 1 |
| <i>Calocitta_formosa</i>           | 1 | 1 | 1 | 1 |
| <i>Caloenas_nicobarica</i>         | 1 | 1 | 1 | 1 |
| <i>Calonectris_diomedea</i>        | 1 | 1 | 1 | 1 |
| <i>Calonectris_leucomelas</i>      | 1 | 1 | 1 | 1 |
| <i>Caloperdix_oculeus</i>          | 1 | 1 | 1 | 1 |
| <i>Calorhamphus_fuliginosus</i>    | 1 | 1 | 1 | 1 |
| <i>Calothorax_pulcher</i>          | 1 | 1 | 1 | 1 |
| <i>Calypte_anna</i>                | 1 | 1 | 1 | 1 |
| <i>Calypte_costae</i>              | 1 | 1 | 1 | 1 |
| <i>Calyptocichla_serina</i>        | 1 | 1 | 1 | 1 |
| <i>Calyptomena_viridis</i>         | 1 | 1 | 1 | 1 |
| <i>Calyptomena_whiteheadi</i>      | 1 | 1 | 1 | 1 |
| <i>Calyptophilus_frugivorus</i>    | 1 | 1 | 1 | 1 |
| <i>Calyptophilus_tertius</i>       | 1 | 1 | 1 | 1 |
| <i>Calyptorhynchus_banksii</i>     | 1 | 1 | 1 | 1 |
| <i>Calyptorhynchus_baudinii</i>    | 1 | 1 | 1 | 1 |
| <i>Calyptorhynchus_funereus</i>    | 1 | 1 | 1 | 1 |
| <i>Calyptorhynchus_lathamii</i>    | 1 | 1 | 1 | 1 |
| <i>Calyptorhynchus_latirostris</i> | 1 | 1 | 1 | 1 |
| <i>Camarhynchus_parvulus</i>       | 1 | 1 | 1 | 1 |
| <i>Camarhynchus_pauper</i>         | 1 | 1 | 1 | 1 |
| <i>Camarhynchus_psittacula</i>     | 1 | 1 | 1 | 1 |
| <i>Camaroptera_brachyura</i>       | 1 | 1 | 1 | 1 |
| <i>Camaroptera_chloronota</i>      | 1 | 1 | 1 | 1 |
| <i>Campephaga_flava</i>            | 1 | 1 | 1 | 1 |
| <i>Campephaga_petiti</i>           | 1 | 1 | 1 | 1 |

|                                        |   |   |   |   |
|----------------------------------------|---|---|---|---|
| <i>Campephilus_gayaquilensis</i>       | 1 | 1 | 1 | 1 |
| <i>Campephilus_guatemalensis</i>       | 1 | 1 | 1 | 1 |
| <i>Campephilus_haematogaster</i>       | 1 | 1 | 1 | 1 |
| <i>Campephilus_imperialis</i>          | 1 | 1 | 1 | 1 |
| <i>Campephilus_leucopogon</i>          | 1 | 1 | 1 | 1 |
| <i>Campephilus_magellanicus</i>        | 1 | 1 | 1 | 1 |
| <i>Campephilus_melanoleucos</i>        | 1 | 1 | 1 | 1 |
| <i>Campephilus_pollens</i>             | 1 | 1 | 1 | 1 |
| <i>Campephilus_principalis</i>         | 1 | 1 | 1 | 1 |
| <i>Campephilus_rubricollis</i>         | 1 | 1 | 1 | 1 |
| <i>Campethera_cailliautii</i>          | 1 | 1 | 1 | 1 |
| <i>Campethera_caroli</i>               | 1 | 1 | 1 | 1 |
| <i>Campethera_nivosa</i>               | 1 | 1 | 1 | 1 |
| <i>Campochaera_sloetii</i>             | 1 | 1 | 1 | 1 |
| <i>Camptostoma_imberbe</i>             | 1 | 1 | 1 | 1 |
| <i>Camptostoma_obsoletum</i>           | 1 | 1 | 1 | 1 |
| <i>Campylopterus_cuvierii</i>          | 1 | 1 | 1 | 1 |
| <i>Campylopterus_falcatus</i>          | 1 | 1 | 1 | 1 |
| <i>Campylopterus_hemileucurus</i>      | 1 | 1 | 1 | 1 |
| <i>Campylopterus_hyperythrus</i>       | 1 | 1 | 1 | 1 |
| <i>Campylopterus_largipennis</i>       | 1 | 1 | 1 | 1 |
| <i>Campylopterus_villaviscensio</i>    | 1 | 1 | 1 | 1 |
| <i>Campylorhamphus_falcularius</i>     | 1 | 1 | 1 | 1 |
| <i>Campylorhamphus_procurvoides</i>    | 1 | 1 | 1 | 1 |
| <i>Campylorhamphus_pucherani</i>       | 1 | 1 | 1 | 1 |
| <i>Campylorhamphus_pusillus</i>        | 1 | 1 | 1 | 1 |
| <i>Campylorhamphus_trochilirostris</i> | 1 | 1 | 1 | 1 |
| <i>Campylorhynchus_albobrunneus</i>    | 1 | 1 | 1 | 1 |
| <i>Campylorhynchus_brunneicapillus</i> | 1 | 1 | 1 | 1 |
| <i>Campylorhynchus_chiapensis</i>      | 1 | 1 | 1 | 1 |
| <i>Campylorhynchus_fasciatus</i>       | 1 | 1 | 1 | 1 |
| <i>Campylorhynchus_griseus</i>         | 1 | 1 | 1 | 1 |
| <i>Campylorhynchus_gularis</i>         | 1 | 1 | 1 | 1 |
| <i>Campylorhynchus_jocosus</i>         | 1 | 1 | 1 | 1 |
| <i>Campylorhynchus_megalopterus</i>    | 1 | 1 | 1 | 1 |
| <i>Campylorhynchus_nuchalis</i>        | 1 | 1 | 1 | 1 |
| <i>Campylorhynchus_rufinucha</i>       | 1 | 1 | 1 | 1 |
| <i>Campylorhynchus_turdinus</i>        | 1 | 1 | 1 | 1 |
| <i>Campylorhynchus_yucatanicus</i>     | 1 | 1 | 1 | 1 |
| <i>Campylorhynchus_zonatus</i>         | 1 | 1 | 1 | 1 |
| <i>Capito_auratus</i>                  | 1 | 1 | 1 | 1 |
| <i>Capito_aurovirens</i>               | 1 | 1 | 1 | 1 |
| <i>Capito_dayi</i>                     | 1 | 1 | 1 | 1 |
| <i>Capito_maculicoronatus</i>          | 1 | 1 | 1 | 1 |

|                                     |   |   |   |   |
|-------------------------------------|---|---|---|---|
| <i>Capito_niger</i>                 | 1 | 1 | 1 | 1 |
| <i>Capito_quinticolor</i>           | 1 | 1 | 1 | 1 |
| <i>Capito_squamatus</i>             | 1 | 1 | 1 | 1 |
| <i>Capito_wallacei</i>              | 1 | 1 | 1 | 1 |
| <i>Caprimulgus_aegyptius</i>        | 1 | 1 | 1 | 1 |
| <i>Caprimulgus_affinis</i>          | 1 | 1 | 1 | 1 |
| <i>Caprimulgus_anthonyi</i>         | 1 | 1 | 1 | 1 |
| <i>Caprimulgus_batesi</i>           | 1 | 1 | 1 | 1 |
| <i>Caprimulgus_candicans</i>        | 1 | 1 | 1 | 1 |
| <i>Caprimulgus_carolinensis</i>     | 1 | 1 | 1 | 1 |
| <i>Caprimulgus_cayennensis</i>      | 1 | 1 | 1 | 1 |
| <i>Caprimulgus_climacurus</i>       | 1 | 1 | 1 | 1 |
| <i>Caprimulgus_enarratus</i>        | 1 | 1 | 1 | 1 |
| <i>Caprimulgus_europaeus</i>        | 1 | 1 | 1 | 1 |
| <i>Caprimulgus_fossii</i>           | 1 | 1 | 1 | 1 |
| <i>Caprimulgus_fraenatus</i>        | 1 | 1 | 1 | 1 |
| <i>Caprimulgus_indicus</i>          | 1 | 1 | 1 | 1 |
| <i>Caprimulgus_inornatus</i>        | 1 | 1 | 1 | 1 |
| <i>Caprimulgus_longirostris</i>     | 1 | 1 | 1 | 1 |
| <i>Caprimulgus_macrurus</i>         | 1 | 1 | 1 | 1 |
| <i>Caprimulgus_maculicaudus</i>     | 1 | 1 | 1 | 1 |
| <i>Caprimulgus_madagascariensis</i> | 1 | 1 | 1 | 1 |
| <i>Caprimulgus_manillensis</i>      | 1 | 1 | 1 | 1 |
| <i>Caprimulgus_nigrescens</i>       | 1 | 1 | 1 | 1 |
| <i>Caprimulgus_nigriscapularis</i>  | 1 | 1 | 1 | 1 |
| <i>Caprimulgus_parvulus</i>         | 1 | 1 | 1 | 1 |
| <i>Caprimulgus_pectoralis</i>       | 1 | 1 | 1 | 1 |
| <i>Caprimulgus_poliocephalus</i>    | 1 | 1 | 1 | 1 |
| <i>Caprimulgus_ridgwayi</i>         | 1 | 1 | 1 | 1 |
| <i>Caprimulgus_rufigena</i>         | 1 | 1 | 1 | 1 |
| <i>Caprimulgus_rufus</i>            | 1 | 1 | 1 | 1 |
| <i>Caprimulgus_salvini</i>          | 1 | 1 | 1 | 1 |
| <i>Caprimulgus_saturatus</i>        | 1 | 1 | 1 | 1 |
| <i>Caprimulgus_vociferus</i>        | 1 | 1 | 1 | 1 |
| <i>Caprimulgus_whitelyi</i>         | 1 | 1 | 1 | 1 |
| <i>Capsiempis_flaveola</i>          | 1 | 1 | 1 | 1 |
| <i>Caracara_cheriway</i>            | 1 | 1 | 1 | 1 |
| <i>Caracara_plancus</i>             | 1 | 1 | 1 | 1 |
| <i>Cardellina_canadensis</i>        | 1 | 1 | 1 | 1 |
| <i>Cardellina_pusilla</i>           | 1 | 1 | 1 | 1 |
| <i>Cardellina_rubra</i>             | 1 | 1 | 1 | 1 |
| <i>Cardellina_rubrifrons</i>        | 1 | 1 | 1 | 1 |
| <i>Cardellina_versicolor</i>        | 1 | 1 | 1 | 1 |
| <i>Cardinalis_cardinalis</i>        | 1 | 1 | 1 | 1 |

|                                 |   |   |   |   |
|---------------------------------|---|---|---|---|
| <i>Cardinalis_phoeniceus</i>    | 1 | 1 | 1 | 1 |
| <i>Cardinalis_sinuatus</i>      | 1 | 1 | 1 | 1 |
| <i>Carduelis_ambigua</i>        | 1 | 1 | 1 | 1 |
| <i>Carduelis_atrata</i>         | 1 | 1 | 1 | 1 |
| <i>Carduelis_barbata</i>        | 1 | 1 | 1 | 1 |
| <i>Carduelis_cannabina</i>      | 1 | 1 | 1 | 1 |
| <i>Carduelis_carduelis</i>      | 1 | 1 | 1 | 1 |
| <i>Carduelis_chloris</i>        | 1 | 1 | 1 | 1 |
| <i>Carduelis_citrinella</i>     | 1 | 1 | 1 | 1 |
| <i>Carduelis_crassirostris</i>  | 1 | 1 | 1 | 1 |
| <i>Carduelis_cucullata</i>      | 1 | 1 | 1 | 1 |
| <i>Carduelis_flammea</i>        | 1 | 1 | 1 | 1 |
| <i>Carduelis_flavirostris</i>   | 1 | 1 | 1 | 1 |
| <i>Carduelis_hornemanni</i>     | 1 | 1 | 1 | 1 |
| <i>Carduelis_lawrencei</i>      | 1 | 1 | 1 | 1 |
| <i>Carduelis_magellanica</i>    | 1 | 1 | 1 | 1 |
| <i>Carduelis_notata</i>         | 1 | 1 | 1 | 1 |
| <i>Carduelis_olivacea</i>       | 1 | 1 | 1 | 1 |
| <i>Carduelis_pinus</i>          | 1 | 1 | 1 | 1 |
| <i>Carduelis_psaltria</i>       | 1 | 1 | 1 | 1 |
| <i>Carduelis_siemiradzkii</i>   | 1 | 1 | 1 | 1 |
| <i>Carduelis_sinica</i>         | 1 | 1 | 1 | 1 |
| <i>Carduelis_spinescens</i>     | 1 | 1 | 1 | 1 |
| <i>Carduelis_spinoides</i>      | 1 | 1 | 1 | 1 |
| <i>Carduelis_spinus</i>         | 1 | 1 | 1 | 1 |
| <i>Carduelis_tristis</i>        | 1 | 1 | 1 | 1 |
| <i>Carduelis_uropygialis</i>    | 1 | 1 | 1 | 1 |
| <i>Carduelis_xanthogastra</i>   | 1 | 1 | 1 | 1 |
| <i>Carduelis_yarrellii</i>      | 1 | 1 | 1 | 1 |
| <i>Cariama_cristata</i>         | 1 | 1 | 1 | 1 |
| <i>Carpococcyx_renauldi</i>     | 1 | 1 | 1 | 1 |
| <i>Carpodacus_cassinii</i>      | 1 | 1 | 1 | 1 |
| <i>Carpodacus_erythrinus</i>    | 1 | 1 | 1 | 1 |
| <i>Carpodacus_mexicanus</i>     | 1 | 1 | 1 | 1 |
| <i>Carpodacus_nipalensis</i>    | 1 | 1 | 1 | 1 |
| <i>Carpodacus_pulcherrimus</i>  | 1 | 1 | 1 | 1 |
| <i>Carpodacus_purpureus</i>     | 1 | 1 | 1 | 1 |
| <i>Carpodacus_rodopeplus</i>    | 1 | 1 | 1 | 1 |
| <i>Carpodacus_roseus</i>        | 1 | 1 | 1 | 1 |
| <i>Carpodacus_rubicilla</i>     | 1 | 1 | 1 | 1 |
| <i>Carpodacus_rubicilloides</i> | 1 | 1 | 1 | 1 |
| <i>Carpodacus_thura</i>         | 1 | 1 | 1 | 1 |
| <i>Carpodacus_trifasciatus</i>  | 1 | 1 | 1 | 1 |
| <i>Carpodacus_vinaceus</i>      | 1 | 1 | 1 | 1 |

|                                   |   |   |   |   |
|-----------------------------------|---|---|---|---|
| <i>Carpodectes_hopkei</i>         | 1 | 1 | 1 | 1 |
| <i>Carpornis_melanocephala</i>    | 1 | 1 | 1 | 1 |
| <i>Carpospiza_brachydactyla</i>   | 1 | 1 | 1 | 1 |
| <i>Caryothraustes_canadensis</i>  | 1 | 1 | 1 | 1 |
| <i>Caryothraustes_poliogaster</i> | 1 | 1 | 1 | 1 |
| <i>Casiornis_rufus</i>            | 1 | 1 | 1 | 1 |
| <i>Casuarius_bennetti</i>         | 1 | 1 | 0 | 1 |
| <i>Casuarius_casuarius</i>        | 1 | 1 | 0 | 1 |
| <i>Catamblyrhynchus_diadema</i>   | 1 | 1 | 1 | 1 |
| <i>Catamenia_analis</i>           | 1 | 1 | 1 | 1 |
| <i>Catamenia_inornata</i>         | 1 | 1 | 1 | 1 |
| <i>Catharacta_chilensis</i>       | 1 | 1 | 1 | 1 |
| <i>Catharacta_skua</i>            | 1 | 1 | 1 | 1 |
| <i>Catharopeza_bishopi</i>        | 1 | 1 | 1 | 1 |
| <i>Cathartes_aura</i>             | 1 | 1 | 1 | 1 |
| <i>Cathartes_burrovianus</i>      | 1 | 1 | 1 | 1 |
| <i>Cathartes_melambrotus</i>      | 1 | 1 | 1 | 1 |
| <i>Catharus_aurantiiostris</i>    | 1 | 1 | 1 | 1 |
| <i>Catharus_bicknelli</i>         | 1 | 1 | 1 | 1 |
| <i>Catharus_dryas</i>             | 1 | 1 | 1 | 1 |
| <i>Catharus_frantzii</i>          | 1 | 1 | 1 | 1 |
| <i>Catharus_fuscater</i>          | 1 | 1 | 1 | 1 |
| <i>Catharus_fuscescens</i>        | 1 | 1 | 1 | 1 |
| <i>Catharus_gracilirostris</i>    | 1 | 1 | 1 | 1 |
| <i>Catharus_guttatus</i>          | 1 | 1 | 1 | 1 |
| <i>Catharus_mexicanus</i>         | 1 | 1 | 1 | 1 |
| <i>Catharus_minimus</i>           | 1 | 1 | 1 | 1 |
| <i>Catharus_occidentalis</i>      | 1 | 1 | 1 | 1 |
| <i>Catharus_ustulatus</i>         | 1 | 1 | 1 | 1 |
| <i>Catherpes_mexicanus</i>        | 1 | 1 | 1 | 1 |
| <i>Catherpes_sumichrasti</i>      | 1 | 1 | 1 | 1 |
| <i>Catreus_wallichii</i>          | 1 | 1 | 1 | 1 |
| <i>Cecropis_abyssinica</i>        | 1 | 1 | 1 | 1 |
| <i>Cecropis_cucullata</i>         | 1 | 1 | 1 | 1 |
| <i>Cecropis_daurica</i>           | 1 | 1 | 1 | 1 |
| <i>Cecropis_semirufa</i>          | 1 | 1 | 1 | 1 |
| <i>Cecropis_striolata</i>         | 1 | 1 | 1 | 1 |
| <i>Celeus_brachyurus</i>          | 1 | 1 | 1 | 1 |
| <i>Celeus_elegans</i>             | 1 | 1 | 1 | 1 |
| <i>Celeus_flavescens</i>          | 1 | 1 | 1 | 1 |
| <i>Celeus_flavus</i>              | 1 | 1 | 1 | 1 |
| <i>Celeus_grammicus</i>           | 1 | 1 | 1 | 1 |
| <i>Celeus_loricatus</i>           | 1 | 1 | 1 | 1 |
| <i>Celeus_lugubris</i>            | 1 | 1 | 1 | 1 |

|                                  |   |   |   |   |
|----------------------------------|---|---|---|---|
| <i>Celeus_spectabilis</i>        | 1 | 1 | 1 | 1 |
| <i>Centrocercus_minimus</i>      | 1 | 1 | 1 | 1 |
| <i>Centrocercus_urophasianus</i> | 1 | 1 | 1 | 1 |
| <i>Centropus_cupreicaudus</i>    | 1 | 1 | 1 | 1 |
| <i>Centropus_grillii</i>         | 1 | 1 | 1 | 1 |
| <i>Centropus_monachus</i>        | 1 | 1 | 1 | 1 |
| <i>Centropus_phasianinus</i>     | 1 | 1 | 1 | 1 |
| <i>Centropus_senegalensis</i>    | 1 | 1 | 1 | 1 |
| <i>Centropus_sinensis</i>        | 1 | 1 | 1 | 1 |
| <i>Centropus_superciliosus</i>   | 1 | 1 | 1 | 1 |
| <i>Centropus_unirufus</i>        | 1 | 1 | 1 | 1 |
| <i>Centropus_viridis</i>         | 1 | 1 | 1 | 1 |
| <i>Cephalopterus_ornatus</i>     | 1 | 1 | 1 | 1 |
| <i>Cepphus_carbo</i>             | 1 | 1 | 1 | 1 |
| <i>Cepphus_columba</i>           | 1 | 1 | 1 | 1 |
| <i>Cepphus_grylle</i>            | 1 | 1 | 1 | 1 |
| <i>Ceratogymna_atrata</i>        | 1 | 1 | 1 | 1 |
| <i>Cercococcyx_montanus</i>      | 1 | 1 | 1 | 1 |
| <i>Cercomacra_brasiliana</i>     | 1 | 1 | 1 | 1 |
| <i>Cercomacra_carbonaria</i>     | 1 | 1 | 1 | 1 |
| <i>Cercomacra_cinerascens</i>    | 1 | 1 | 1 | 1 |
| <i>Cercomacra_laeta</i>          | 1 | 1 | 1 | 1 |
| <i>Cercomacra_manu</i>           | 1 | 1 | 1 | 1 |
| <i>Cercomacra_melanaria</i>      | 1 | 1 | 1 | 1 |
| <i>Cercomacra_nigrescens</i>     | 1 | 1 | 1 | 1 |
| <i>Cercomacra_nigricans</i>      | 1 | 1 | 1 | 1 |
| <i>Cercomacra_parkeri</i>        | 1 | 1 | 1 | 1 |
| <i>Cercomacra_serva</i>          | 1 | 1 | 1 | 1 |
| <i>Cercomacra_tyrannina</i>      | 1 | 1 | 1 | 1 |
| <i>Cercomela_dubia</i>           | 1 | 1 | 1 | 1 |
| <i>Cercomela_familiaris</i>      | 1 | 1 | 1 | 1 |
| <i>Cercomela_fusca</i>           | 1 | 1 | 1 | 1 |
| <i>Cercomela_melanura</i>        | 1 | 1 | 1 | 1 |
| <i>Cercomela_schlegelii</i>      | 1 | 1 | 1 | 1 |
| <i>Cercomela_scotocerca</i>      | 1 | 1 | 1 | 1 |
| <i>Cercomela_sinuata</i>         | 1 | 1 | 1 | 1 |
| <i>Cercomela_sordida</i>         | 1 | 1 | 1 | 1 |
| <i>Cercomela_tractrac</i>        | 1 | 1 | 1 | 1 |
| <i>Cercotrichas_barbata</i>      | 1 | 1 | 1 | 1 |
| <i>Cercotrichas_coryphoeus</i>   | 1 | 1 | 1 | 1 |
| <i>Cercotrichas_galactotes</i>   | 1 | 1 | 1 | 1 |
| <i>Cercotrichas_hartlaubi</i>    | 1 | 1 | 1 | 1 |
| <i>Cercotrichas_leucophrys</i>   | 1 | 1 | 1 | 1 |
| <i>Cercotrichas_leucosticta</i>  | 1 | 1 | 1 | 1 |

|                                   |   |   |   |   |
|-----------------------------------|---|---|---|---|
| <i>Cercotrichas paena</i>         | 1 | 1 | 1 | 1 |
| <i>Cercotrichas podobe</i>        | 1 | 1 | 1 | 1 |
| <i>Cercotrichas quadrivirgata</i> | 1 | 1 | 1 | 1 |
| <i>Cereopsis novaehollandiae</i>  | 1 | 1 | 1 | 1 |
| <i>Cerorhinca monocerata</i>      | 1 | 1 | 1 | 1 |
| <i>Certhia americana</i>          | 1 | 1 | 1 | 1 |
| <i>Certhia brachydactyla</i>      | 1 | 1 | 1 | 1 |
| <i>Certhia discolor</i>           | 1 | 1 | 1 | 1 |
| <i>Certhia familiaris</i>         | 1 | 1 | 1 | 1 |
| <i>Certhia himalayana</i>         | 1 | 1 | 1 | 1 |
| <i>Certhia hodgsoni</i>           | 1 | 1 | 1 | 1 |
| <i>Certhia manipurensis</i>       | 1 | 1 | 1 | 1 |
| <i>Certhia nipalensis</i>         | 1 | 1 | 1 | 1 |
| <i>Certhia tianquanensis</i>      | 1 | 1 | 1 | 1 |
| <i>Certhiaxis cinnamomeus</i>     | 1 | 1 | 1 | 1 |
| <i>Certhidea olivacea</i>         | 1 | 1 | 1 | 1 |
| <i>Certhilauda albescens</i>      | 1 | 1 | 1 | 1 |
| <i>Certhilauda barlowi</i>        | 1 | 1 | 1 | 1 |
| <i>Certhilauda burra</i>          | 1 | 1 | 1 | 1 |
| <i>Certhilauda chuana</i>         | 1 | 1 | 1 | 1 |
| <i>Certhilauda curvirostris</i>   | 1 | 1 | 1 | 1 |
| <i>Certhilauda semitorquata</i>   | 1 | 1 | 1 | 1 |
| <i>Certhilauda subcoronata</i>    | 1 | 1 | 1 | 1 |
| <i>Certhionyx niger</i>           | 1 | 1 | 1 | 1 |
| <i>Certhionyx pectoralis</i>      | 1 | 1 | 1 | 1 |
| <i>Certhionyx variegatus</i>      | 1 | 1 | 1 | 1 |
| <i>Ceryle rudis</i>               | 1 | 1 | 1 | 1 |
| <i>Cettia acanthizoides</i>       | 1 | 1 | 1 | 1 |
| <i>Cettia annae</i>               | 1 | 1 | 1 | 1 |
| <i>Cettia brunnescens</i>         | 1 | 1 | 1 | 1 |
| <i>Cettia cetti</i>               | 1 | 1 | 1 | 1 |
| <i>Cettia diphone</i>             | 1 | 1 | 1 | 1 |
| <i>Cettia flavolivacea</i>        | 1 | 1 | 1 | 1 |
| <i>Cettia fortipes</i>            | 1 | 1 | 1 | 1 |
| <i>Cettia parens</i>              | 1 | 1 | 1 | 1 |
| <i>Cettia ruficapilla</i>         | 1 | 1 | 1 | 1 |
| <i>Cettia seebohmi</i>            | 1 | 1 | 1 | 1 |
| <i>Cettia vulcania</i>            | 1 | 1 | 1 | 1 |
| <i>Ceyx erithaca</i>              | 1 | 1 | 1 | 1 |
| <i>Ceyx fallax</i>                | 1 | 1 | 1 | 1 |
| <i>Ceyx lecontei</i>              | 1 | 1 | 1 | 1 |
| <i>Ceyx lepidus</i>               | 1 | 1 | 1 | 1 |
| <i>Ceyx madagascariensis</i>      | 1 | 1 | 1 | 1 |
| <i>Ceyx melanurus</i>             | 1 | 1 | 1 | 1 |

|                                    |   |   |   |   |
|------------------------------------|---|---|---|---|
| <i>Ceyx pictus</i>                 | 1 | 1 | 1 | 1 |
| <i>Ceyx rufidorsa</i>              | 1 | 1 | 1 | 1 |
| <i>Chaetocercus bombus</i>         | 1 | 1 | 1 | 1 |
| <i>Chaetocercus mulsanti</i>       | 1 | 1 | 1 | 1 |
| <i>Chaetops frenatus</i>           | 1 | 1 | 1 | 1 |
| <i>Chaetorhynchus papuensis</i>    | 1 | 1 | 1 | 1 |
| <i>Chaetura chapmani</i>           | 1 | 1 | 1 | 1 |
| <i>Chaetura cinereiventris</i>     | 1 | 1 | 1 | 1 |
| <i>Chaetura pelagica</i>           | 1 | 1 | 1 | 1 |
| <i>Chaetura vauxi</i>              | 1 | 1 | 1 | 1 |
| <i>Chaimarrornis leucocephalus</i> | 1 | 1 | 1 | 1 |
| <i>Chalcites basalis</i>           | 1 | 1 | 1 | 1 |
| <i>Chalcites lucidus</i>           | 1 | 1 | 1 | 1 |
| <i>Chalcites minutillus</i>        | 1 | 1 | 1 | 1 |
| <i>Chalcophaps indica</i>          | 1 | 1 | 1 | 1 |
| <i>Chalcophaps stephani</i>        | 1 | 1 | 1 | 1 |
| <i>Chalcopsitta atra</i>           | 1 | 1 | 1 | 1 |
| <i>Chalcopsitta cardinalis</i>     | 1 | 1 | 1 | 1 |
| <i>Chalcopsitta duivenbodei</i>    | 1 | 1 | 1 | 1 |
| <i>Chalcopsitta scintillata</i>    | 1 | 1 | 1 | 1 |
| <i>Chalcostigma herrani</i>        | 1 | 1 | 1 | 1 |
| <i>Chalcostigma olivaceum</i>      | 1 | 1 | 1 | 1 |
| <i>Chalcostigma ruficeps</i>       | 1 | 1 | 1 | 1 |
| <i>Chalcostigma stanleyi</i>       | 1 | 1 | 1 | 1 |
| <i>Chalybura buffonii</i>          | 1 | 1 | 1 | 1 |
| <i>Chalybura urochrysia</i>        | 1 | 1 | 1 | 1 |
| <i>Chamaea fasciata</i>            | 1 | 1 | 1 | 1 |
| <i>Chamaepetes goudotii</i>        | 1 | 1 | 1 | 1 |
| <i>Chamaepetes unicolor</i>        | 1 | 1 | 1 | 1 |
| <i>Chamaeza campanisona</i>        | 1 | 1 | 1 | 1 |
| <i>Chamaeza meruloides</i>         | 1 | 1 | 1 | 1 |
| <i>Chamaeza mollissima</i>         | 1 | 1 | 1 | 1 |
| <i>Chamaeza nobilis</i>            | 1 | 1 | 1 | 1 |
| <i>Charadrius alexandrinus</i>     | 1 | 1 | 1 | 1 |
| <i>Charadrius alticola</i>         | 1 | 1 | 1 | 1 |
| <i>Charadrius bicinctus</i>        | 1 | 1 | 1 | 1 |
| <i>Charadrius collaris</i>         | 1 | 1 | 1 | 1 |
| <i>Charadrius dubius</i>           | 1 | 1 | 1 | 1 |
| <i>Charadrius falklandicus</i>     | 1 | 1 | 1 | 1 |
| <i>Charadrius hiaticula</i>        | 1 | 1 | 1 | 1 |
| <i>Charadrius leschenaultii</i>    | 1 | 1 | 1 | 1 |
| <i>Charadrius marginatus</i>       | 1 | 1 | 1 | 1 |
| <i>Charadrius melodus</i>          | 1 | 1 | 1 | 1 |
| <i>Charadrius modestus</i>         | 1 | 1 | 1 | 1 |



|                                  |   |   |   |   |
|----------------------------------|---|---|---|---|
| <i>Charadrius_mongolus</i>       | 1 | 1 | 1 | 1 |
| <i>Charadrius_montanus</i>       | 1 | 1 | 1 | 1 |
| <i>Charadrius_morinellus</i>     | 1 | 1 | 1 | 1 |
| <i>Charadrius_ruficapillus</i>   | 1 | 1 | 1 | 1 |
| <i>Charadrius_semipalmatus</i>   | 1 | 1 | 1 | 1 |
| <i>Charadrius_yerodus</i>        | 1 | 1 | 1 | 1 |
| <i>Charadrius_vociferus</i>      | 1 | 1 | 1 | 1 |
| <i>Charadrius_wilsonia</i>       | 1 | 1 | 1 | 1 |
| <i>Charmosyna_papou</i>          | 1 | 1 | 1 | 1 |
| <i>Charmosyna_placentis</i>      | 1 | 1 | 1 | 1 |
| <i>Charmosyna_pulchella</i>      | 1 | 1 | 1 | 1 |
| <i>Charmosyna_rubronotata</i>    | 1 | 1 | 1 | 1 |
| <i>Chasiempis_sandwichensis</i>  | 1 | 1 | 1 | 1 |
| <i>Chauna_torquata</i>           | 1 | 1 | 1 | 1 |
| <i>Chenonetta_jubata</i>         | 1 | 1 | 1 | 1 |
| <i>Cheramoeca_leucosternus</i>   | 1 | 1 | 1 | 1 |
| <i>Chersomanes_albofasciata</i>  | 1 | 1 | 1 | 1 |
| <i>Chersophilus_duponti</i>      | 1 | 1 | 1 | 1 |
| <i>Chilia_melanura</i>           | 1 | 1 | 1 | 1 |
| <i>Chionis_alba</i>              | 1 | 1 | 1 | 1 |
| <i>Chionis_minor</i>             | 1 | 1 | 1 | 1 |
| <i>Chiroxiphia_boliviana</i>     | 1 | 1 | 1 | 1 |
| <i>Chiroxiphia_caudata</i>       | 1 | 1 | 1 | 1 |
| <i>Chiroxiphia_linearis</i>      | 1 | 1 | 1 | 1 |
| <i>Chiroxiphia_pareola</i>       | 1 | 1 | 1 | 1 |
| <i>Chlamydera_cerviniventris</i> | 1 | 1 | 1 | 1 |
| <i>Chlamydera_lauterbachii</i>   | 1 | 1 | 1 | 1 |
| <i>Chlamydera_maculata</i>       | 1 | 1 | 1 | 1 |
| <i>Chlamydera_nuchalis</i>       | 1 | 1 | 1 | 1 |
| <i>Chlamydochaera_jefferyi</i>   | 1 | 1 | 1 | 1 |
| <i>Chlamydotis_undulata</i>      | 1 | 1 | 1 | 1 |
| <i>Chlidonias_hybridus</i>       | 1 | 1 | 1 | 1 |
| <i>Chlidonias_leucopterus</i>    | 1 | 1 | 1 | 1 |
| <i>Chlidonias_niger</i>          | 1 | 1 | 1 | 1 |
| <i>Chloephaga_melanoptera</i>    | 1 | 1 | 1 | 1 |
| <i>Chloephaga_picta</i>          | 1 | 1 | 1 | 1 |
| <i>Chloephaga_poliocephala</i>   | 1 | 1 | 1 | 1 |
| <i>Chloroceryle_aenea</i>        | 1 | 1 | 1 | 1 |
| <i>Chloroceryle_amazona</i>      | 1 | 1 | 1 | 1 |
| <i>Chloroceryle_americana</i>    | 1 | 1 | 1 | 1 |
| <i>Chloroceryle_inda</i>         | 1 | 1 | 1 | 1 |
| <i>Chlorocharis_emiliae</i>      | 1 | 1 | 1 | 1 |
| <i>Chlorochrysa_calliparaea</i>  | 1 | 1 | 1 | 1 |
| <i>Chlorochrysa_nitidissima</i>  | 1 | 1 | 1 | 1 |

|                                                |   |   |   |   |
|------------------------------------------------|---|---|---|---|
| <i>Chlorochrysa phoenicotis</i>                | 1 | 1 | 1 | 1 |
| <i>Chlorocichla flavicollis</i>                | 1 | 1 | 1 | 1 |
| <i>Chlorocichla flaviventris</i>               | 1 | 1 | 1 | 1 |
| <i>Chloropeta gracilirostris</i>               | 1 | 1 | 1 | 1 |
| <i>Chloropeta natalensis</i>                   | 1 | 1 | 1 | 1 |
| <i>Chloropeta similis</i>                      | 1 | 1 | 1 | 1 |
| <i>Chlorophanes spiza</i>                      | 1 | 1 | 1 | 1 |
| <i>Chlorophonia flavirostris</i>               | 1 | 1 | 1 | 1 |
| <i>Chlorophonia occipitalis</i>                | 1 | 1 | 1 | 1 |
| <i>Chloropipo uniformis</i>                    | 1 | 1 | 1 | 1 |
| <i>Chloropsis aurifrons</i>                    | 1 | 1 | 1 | 1 |
| <i>Chloropsis cochinchinensis</i>              | 1 | 1 | 1 | 1 |
| <i>Chloropsis hardwickii</i>                   | 1 | 1 | 1 | 1 |
| <i>Chlorornis riefferii</i>                    | 1 | 1 | 1 | 1 |
| <i>Chlorospingus canigularis</i>               | 1 | 1 | 1 | 1 |
| <i>Chlorospingus flavigularis</i>              | 1 | 1 | 1 | 1 |
| <i>Chlorospingus inornatus</i>                 | 1 | 1 | 1 | 1 |
| <i>Chlorospingus ophthalmicus</i>              | 1 | 1 | 1 | 1 |
| <i>Chlorospingus ophthalmicus fulvigularis</i> | 1 | 1 | 1 | 1 |
| <i>Chlorospingus parvirostris</i>              | 1 | 1 | 1 | 1 |
| <i>Chlorospingus pileatus</i>                  | 1 | 1 | 1 | 1 |
| <i>Chlorospingus semifuscus</i>                | 1 | 1 | 1 | 1 |
| <i>Chlorospingus tacarcunae</i>                | 1 | 1 | 1 | 1 |
| <i>Chlorostilbon aureoventris</i>              | 1 | 1 | 1 | 1 |
| <i>Chlorostilbon melanorhynchus</i>            | 1 | 1 | 1 | 1 |
| <i>Chlorostilbon mellisugus</i>                | 1 | 1 | 1 | 1 |
| <i>Chlorostilbon notatus</i>                   | 1 | 1 | 1 | 1 |
| <i>Chlorostilbon poortmani</i>                 | 1 | 1 | 1 | 1 |
| <i>Chlorothraupis carmioli</i>                 | 1 | 1 | 1 | 1 |
| <i>Chlorothraupis olivacea</i>                 | 1 | 1 | 1 | 1 |
| <i>Chlorothraupis stolzmanni</i>               | 1 | 1 | 1 | 1 |
| <i>Chondestes grammacus</i>                    | 1 | 1 | 1 | 1 |
| <i>Chondrohierax uncinatus</i>                 | 1 | 1 | 1 | 1 |
| <i>Chordeiles acutipennis</i>                  | 1 | 1 | 1 | 1 |
| <i>Chordeiles minor</i>                        | 1 | 1 | 1 | 1 |
| <i>Chordeiles pusillus</i>                     | 1 | 1 | 1 | 1 |
| <i>Chordeiles rupestris</i>                    | 1 | 1 | 1 | 1 |
| <i>Chroicocephalus cirrocephalus</i>           | 1 | 1 | 1 | 1 |
| <i>Chroicocephalus ridibundus</i>              | 1 | 1 | 1 | 1 |
| <i>Chroicocephalus scopulinus</i>              | 1 | 1 | 1 | 1 |
| <i>Chrysococcyx flavigularis</i>               | 1 | 1 | 1 | 1 |
| <i>Chrysococcyx klaas</i>                      | 1 | 1 | 1 | 1 |
| <i>Chrysococcyx osculans</i>                   | 1 | 1 | 1 | 1 |
| <i>Chrysocolaptes lucidus</i>                  | 1 | 1 | 1 | 1 |

|                                  |   |   |   |   |
|----------------------------------|---|---|---|---|
| <i>Chrysolampis_mosquitus</i>    | 1 | 1 | 1 | 1 |
| <i>Chrysolophus_amherstiae</i>   | 1 | 1 | 1 | 1 |
| <i>Chrysolophus_pictus</i>       | 1 | 1 | 1 | 1 |
| <i>Chrysomma_sinense</i>         | 1 | 1 | 1 | 1 |
| <i>Chrysomus_cyanopus</i>        | 1 | 1 | 1 | 1 |
| <i>Chrysomus_icterocephalus</i>  | 1 | 1 | 1 | 1 |
| <i>Chrysomus_ruficapillus</i>    | 1 | 1 | 1 | 1 |
| <i>Chrysomus_thilius</i>         | 1 | 1 | 1 | 1 |
| <i>Chrysomus_xanthophthalmus</i> | 1 | 1 | 1 | 1 |
| <i>Chrysothlypis_chrysomelas</i> | 1 | 1 | 1 | 1 |
| <i>Chrysuronia_oenone</i>        | 1 | 1 | 1 | 1 |
| <i>Ciccaba_virgata</i>           | 1 | 1 | 1 | 1 |
| <i>Cichladusa_guttata</i>        | 1 | 1 | 1 | 1 |
| <i>Cichlherminia_lherminieri</i> | 1 | 1 | 1 | 1 |
| <i>Cichlopsis_leucogenys</i>     | 1 | 1 | 1 | 1 |
| <i>Ciccinnurus_regius</i>        | 1 | 1 | 1 | 1 |
| <i>Ciconia_abdimii</i>           | 1 | 1 | 1 | 1 |
| <i>Ciconia_boyciana</i>          | 1 | 1 | 1 | 1 |
| <i>Ciconia_ciconia</i>           | 1 | 1 | 1 | 1 |
| <i>Ciconia_episcopus</i>         | 1 | 1 | 1 | 1 |
| <i>Ciconia_maguari</i>           | 1 | 1 | 1 | 1 |
| <i>Ciconia_nigra</i>             | 1 | 1 | 1 | 1 |
| <i>Ciconia_stormi</i>            | 1 | 1 | 1 | 1 |
| <i>Cinclidium_frontale</i>       | 1 | 1 | 1 | 1 |
| <i>Cinclocerthia_gutturialis</i> | 1 | 1 | 1 | 1 |
| <i>Cinclocerthia_ruficauda</i>   | 1 | 1 | 1 | 1 |
| <i>Cinclodes_albidiventris</i>   | 1 | 1 | 1 | 1 |
| <i>Cinclodes_antarcticus</i>     | 1 | 1 | 1 | 1 |
| <i>Cinclodes_aricomae</i>        | 1 | 1 | 1 | 1 |
| <i>Cinclodes_atacamensis</i>     | 1 | 1 | 1 | 1 |
| <i>Cinclodes_comechingonus</i>   | 1 | 1 | 1 | 1 |
| <i>Cinclodes_excelsior</i>       | 1 | 1 | 1 | 1 |
| <i>Cinclodes_fuscus</i>          | 1 | 1 | 1 | 1 |
| <i>Cinclodes_nigrofumosus</i>    | 1 | 1 | 1 | 1 |
| <i>Cinclodes_olrogi</i>          | 1 | 1 | 1 | 1 |
| <i>Cinclodes_oustaleti</i>       | 1 | 1 | 1 | 1 |
| <i>Cinclodes_pabsti</i>          | 1 | 1 | 1 | 1 |
| <i>Cinclodes_palliatus</i>       | 1 | 1 | 1 | 1 |
| <i>Cinclodes_patagonicus</i>     | 1 | 1 | 1 | 1 |
| <i>Cinclodes_taczanowskii</i>    | 1 | 1 | 1 | 1 |
| <i>Cincloramphus_mathewsi</i>    | 1 | 1 | 1 | 1 |
| <i>Cinclosoma_alisteri</i>       | 1 | 1 | 1 | 1 |
| <i>Cinclosoma_castaneothorax</i> | 1 | 1 | 1 | 1 |
| <i>Cinclosoma_castanotum</i>     | 1 | 1 | 1 | 1 |

|                                    |   |   |   |   |
|------------------------------------|---|---|---|---|
| <i>Cinclosoma_cinnamomeum</i>      | 1 | 1 | 1 | 1 |
| <i>Cinclosoma_punctatum</i>        | 1 | 1 | 1 | 1 |
| <i>Cinclus_cinclus</i>             | 1 | 1 | 1 | 1 |
| <i>Cinclus_mexicanus</i>           | 1 | 1 | 1 | 1 |
| <i>Cinclus_pallasii</i>            | 1 | 1 | 1 | 1 |
| <i>Cinnycerthia_peruana</i>        | 1 | 1 | 1 | 1 |
| <i>Cinnyricinclus_femoralis</i>    | 1 | 1 | 1 | 1 |
| <i>Cinnyricinclus_leucogaster</i>  | 1 | 1 | 1 | 1 |
| <i>Cinnyricinclus_sharpii</i>      | 1 | 1 | 1 | 1 |
| <i>Cinnyris_abbotti</i>            | 1 | 1 | 1 | 1 |
| <i>Cinnyris_comorensis</i>         | 1 | 1 | 1 | 1 |
| <i>Cinnyris_coquerellii</i>        | 1 | 1 | 1 | 1 |
| <i>Cinnyris_mariquensis</i>        | 1 | 1 | 1 | 1 |
| <i>Cinnyris_pulchellus</i>         | 1 | 1 | 1 | 1 |
| <i>Cinnyris_souimanga</i>          | 1 | 1 | 1 | 1 |
| <i>Cinnyris_superbus</i>           | 1 | 1 | 1 | 1 |
| <i>Circaetus_cinerascens</i>       | 1 | 1 | 1 | 1 |
| <i>Circaetus_cinereus</i>          | 1 | 1 | 1 | 1 |
| <i>Circaetus_fasciolatus</i>       | 1 | 1 | 1 | 1 |
| <i>Circaetus_gallicus</i>          | 1 | 1 | 1 | 1 |
| <i>Circaetus_pectoralis</i>        | 1 | 1 | 1 | 1 |
| <i>Circus_aeruginosus</i>          | 1 | 1 | 1 | 1 |
| <i>Circus_buffoni</i>              | 1 | 1 | 1 | 1 |
| <i>Circus_cinereus</i>             | 1 | 1 | 1 | 1 |
| <i>Circus_cyaneus</i>              | 1 | 1 | 1 | 1 |
| <i>Circus_ranivorous</i>           | 1 | 1 | 1 | 1 |
| <i>Cissa_chinensis</i>             | 1 | 1 | 1 | 1 |
| <i>Cissopis_leverianus</i>         | 1 | 1 | 1 | 1 |
| <i>Cisticola_anonymus</i>          | 1 | 1 | 1 | 1 |
| <i>Cisticola_brachypterus</i>      | 1 | 1 | 1 | 1 |
| <i>Cisticola_cantans</i>           | 1 | 1 | 1 | 1 |
| <i>Cisticola_cherina</i>           | 1 | 1 | 1 | 1 |
| <i>Cisticola_fulvicapilla</i>      | 1 | 1 | 1 | 1 |
| <i>Cisticola_galactotes</i>        | 1 | 1 | 1 | 1 |
| <i>Cisticola_juncidis</i>          | 1 | 1 | 1 | 1 |
| <i>Cistothorus_palustris</i>       | 1 | 1 | 1 | 1 |
| <i>Cistothorus_platensis</i>       | 1 | 1 | 1 | 1 |
| <i>Cittura_cyanotis</i>            | 1 | 1 | 1 | 1 |
| <i>Cladorhynchus_leucocephalus</i> | 1 | 1 | 1 | 1 |
| <i>Clamator_glandarius</i>         | 1 | 1 | 1 | 1 |
| <i>Clamator_jacobinus</i>          | 1 | 1 | 1 | 1 |
| <i>Clangula_hyemalis</i>           | 1 | 1 | 1 | 1 |
| <i>Claravis_pretiosa</i>           | 1 | 1 | 1 | 1 |
| <i>Cleptornis_marchei</i>          | 1 | 1 | 1 | 1 |

|                                       |   |   |   |   |
|---------------------------------------|---|---|---|---|
| <i>Clibanornis_dendrocolaptoides</i>  | 1 | 1 | 1 | 1 |
| <i>Climacteris_erythropros</i>        | 1 | 1 | 1 | 1 |
| <i>Climacteris_picumnus</i>           | 1 | 1 | 1 | 1 |
| <i>Climacteris_rufus</i>              | 1 | 1 | 1 | 1 |
| <i>Clytoceyx_rex</i>                  | 1 | 1 | 1 | 1 |
| <i>Clytorhynchus_hamlini</i>          | 1 | 1 | 1 | 1 |
| <i>Clytorhynchus_pachycephaloides</i> | 1 | 1 | 1 | 1 |
| <i>Clytospiza_monteiri</i>            | 1 | 1 | 1 | 1 |
| <i>Cnemarchus_erythroptygus</i>       | 1 | 1 | 1 | 1 |
| <i>Cnemophilus_loriae</i>             | 1 | 1 | 1 | 1 |
| <i>Cnemophilus_macgregorii</i>        | 1 | 1 | 1 | 1 |
| <i>Cnemoscopus_rubrirostris</i>       | 1 | 1 | 1 | 1 |
| <i>Cnemotriccus_fuscatus</i>          | 1 | 1 | 1 | 1 |
| <i>Cnipodectes_subbrunneus</i>        | 1 | 1 | 1 | 1 |
| <i>Coccothraustes_coccothraustes</i>  | 1 | 1 | 1 | 1 |
| <i>Coccyua_minuta</i>                 | 1 | 1 | 1 | 1 |
| <i>Coccyzus_americanus</i>            | 1 | 1 | 1 | 1 |
| <i>Coccyzus_erythrophthalmus</i>      | 1 | 1 | 1 | 1 |
| <i>Coccyzus_melacoryphus</i>          | 1 | 1 | 1 | 1 |
| <i>Coccyzus_minor</i>                 | 1 | 1 | 1 | 1 |
| <i>Cochlearius_cochlearius</i>        | 1 | 1 | 1 | 1 |
| <i>Cochoa_viridis</i>                 | 1 | 1 | 1 | 1 |
| <i>Coeligena_bonapartei</i>           | 1 | 1 | 1 | 1 |
| <i>Coeligena_coeligena</i>            | 1 | 1 | 1 | 1 |
| <i>Coeligena_helianthea</i>           | 1 | 1 | 1 | 1 |
| <i>Coeligena_iris</i>                 | 1 | 1 | 1 | 1 |
| <i>Coeligena_lutetiae</i>             | 1 | 1 | 1 | 1 |
| <i>Coeligena_orina</i>                | 1 | 1 | 1 | 1 |
| <i>Coeligena_phalerata</i>            | 1 | 1 | 1 | 1 |
| <i>Coeligena_prunellei</i>            | 1 | 1 | 1 | 1 |
| <i>Coeligena_torquata</i>             | 1 | 1 | 1 | 1 |
| <i>Coeligena_violifer</i>             | 1 | 1 | 1 | 1 |
| <i>Coeligena_wilsoni</i>              | 1 | 1 | 1 | 1 |
| <i>Coenocorypha_aucklandica</i>       | 1 | 1 | 1 | 1 |
| <i>Coenocorypha_pusilla</i>           | 1 | 1 | 1 | 1 |
| <i>Coereba_flaveola</i>               | 1 | 1 | 1 | 1 |
| <i>Colaptes_atricollis</i>            | 1 | 1 | 1 | 1 |
| <i>Colaptes_auratus</i>               | 1 | 1 | 1 | 1 |
| <i>Colaptes_campestris</i>            | 1 | 1 | 1 | 1 |
| <i>Colaptes_fernandinae</i>           | 1 | 1 | 1 | 1 |
| <i>Colaptes_melanochloros</i>         | 1 | 1 | 1 | 1 |
| <i>Colaptes_pitius</i>                | 1 | 1 | 1 | 1 |
| <i>Colaptes_punctigula</i>            | 1 | 1 | 1 | 1 |
| <i>Colaptes_rupicola</i>              | 1 | 1 | 1 | 1 |

|                                  |   |   |   |   |
|----------------------------------|---|---|---|---|
| <i>Colibri_coruscans</i>         | 1 | 1 | 1 | 1 |
| <i>Colibri_delphinae</i>         | 1 | 1 | 1 | 1 |
| <i>Colibri_serrirostris</i>      | 1 | 1 | 1 | 1 |
| <i>Colibri_thalassinus</i>       | 1 | 1 | 1 | 1 |
| <i>Colinus_cristatus</i>         | 1 | 1 | 1 | 1 |
| <i>Colinus_virginianus</i>       | 1 | 1 | 1 | 1 |
| <i>Colius_colius</i>             | 1 | 1 | 1 | 1 |
| <i>Colius_leucocephalus</i>      | 1 | 1 | 1 | 1 |
| <i>Colius_striatus</i>           | 1 | 1 | 1 | 1 |
| <i>Collocalia_esculenta</i>      | 1 | 1 | 1 | 1 |
| <i>Collocalia_linchi</i>         | 1 | 1 | 1 | 1 |
| <i>Collocalia_troglodytes</i>    | 1 | 1 | 1 | 1 |
| <i>Collocalia_vanikorensis</i>   | 1 | 1 | 1 | 1 |
| <i>Colluricincla_boweri</i>      | 1 | 1 | 1 | 1 |
| <i>Colluricincla_harmonica</i>   | 1 | 1 | 1 | 1 |
| <i>Colluricincla_megarhyncha</i> | 1 | 1 | 1 | 1 |
| <i>Colluricincla_woodwardi</i>   | 1 | 1 | 1 | 1 |
| <i>Colonia_colonus</i>           | 1 | 1 | 1 | 1 |
| <i>Colorhamphus_parvirostris</i> | 1 | 1 | 1 | 1 |
| <i>Columba_arquatrix</i>         | 1 | 1 | 1 | 1 |
| <i>Columba_bollii</i>            | 1 | 1 | 1 | 1 |
| <i>Columba_guinea</i>            | 1 | 1 | 1 | 1 |
| <i>Columba_junoniae</i>          | 1 | 1 | 1 | 1 |
| <i>Columba_livia</i>             | 1 | 1 | 1 | 1 |
| <i>Columba_oenas</i>             | 1 | 1 | 1 | 1 |
| <i>Columba_palumbus</i>          | 1 | 1 | 1 | 1 |
| <i>Columba_pulchricollis</i>     | 1 | 1 | 1 | 1 |
| <i>Columba_rupestris</i>         | 1 | 1 | 1 | 1 |
| <i>Columba_vitiensis</i>         | 1 | 1 | 1 | 1 |
| <i>Columbina_cruziana</i>        | 1 | 1 | 1 | 1 |
| <i>Columbina_inca</i>            | 1 | 1 | 1 | 1 |
| <i>Columbina_minuta</i>          | 1 | 1 | 1 | 1 |
| <i>Columbina_passerina</i>       | 1 | 1 | 1 | 1 |
| <i>Columbina_picui</i>           | 1 | 1 | 1 | 1 |
| <i>Columbina_talpacoti</i>       | 1 | 1 | 1 | 1 |
| <i>Conioptilon_mcilhennyi</i>    | 1 | 1 | 1 | 1 |
| <i>Conirostrum_albifrons</i>     | 1 | 1 | 1 | 1 |
| <i>Conirostrum_bicolor</i>       | 1 | 1 | 1 | 1 |
| <i>Conirostrum_margaritae</i>    | 1 | 1 | 1 | 1 |
| <i>Conirostrum_sitticolor</i>    | 1 | 1 | 1 | 1 |
| <i>Conirostrum_speciosum</i>     | 1 | 1 | 1 | 1 |
| <i>Conopophaga_ardesiaca</i>     | 1 | 1 | 1 | 1 |
| <i>Conopophaga_aurita</i>        | 1 | 1 | 1 | 1 |
| <i>Conopophaga_lineata</i>       | 1 | 1 | 1 | 1 |

|                                 |   |   |   |   |
|---------------------------------|---|---|---|---|
| <i>Conopophaga_peruviana</i>    | 1 | 1 | 1 | 1 |
| <i>Conopophila_albogularis</i>  | 1 | 1 | 1 | 1 |
| <i>Conopophila_rufogularis</i>  | 1 | 1 | 1 | 1 |
| <i>Conothraupis_speculigera</i> | 1 | 1 | 1 | 1 |
| <i>Contopus_cinereus</i>        | 1 | 1 | 1 | 1 |
| <i>Contopus_cooperi</i>         | 1 | 1 | 1 | 1 |
| <i>Contopus_fumigatus</i>       | 1 | 1 | 1 | 1 |
| <i>Contopus_pertinax</i>        | 1 | 1 | 1 | 1 |
| <i>Contopus_sordidulus</i>      | 1 | 1 | 1 | 1 |
| <i>Contopus_virens</i>          | 1 | 1 | 1 | 1 |
| <i>Copsychus_albospecularis</i> | 1 | 1 | 1 | 1 |
| <i>Copsychus_cebuensis</i>      | 1 | 1 | 1 | 1 |
| <i>Copsychus_luzoniensis</i>    | 1 | 1 | 1 | 1 |
| <i>Copsychus_malabaricus</i>    | 1 | 1 | 1 | 1 |
| <i>Copsychus_niger</i>          | 1 | 1 | 1 | 1 |
| <i>Copsychus_sauularis</i>      | 1 | 1 | 1 | 1 |
| <i>Copsychus_sechellarum</i>    | 1 | 1 | 1 | 1 |
| <i>Copsychus_stricklandii</i>   | 1 | 1 | 1 | 1 |
| <i>Coracias_abyssinica</i>      | 1 | 1 | 1 | 1 |
| <i>Coracias_caudatus</i>        | 1 | 1 | 1 | 1 |
| <i>Coracias_garrulus</i>        | 1 | 1 | 1 | 1 |
| <i>Coracias_spatulata</i>       | 1 | 1 | 1 | 1 |
| <i>Coracina_abbotti</i>         | 1 | 1 | 1 | 1 |
| <i>Coracina_analis</i>          | 1 | 1 | 1 | 1 |
| <i>Coracina_atriceps</i>        | 1 | 1 | 1 | 1 |
| <i>Coracina_azurea</i>          | 1 | 1 | 1 | 1 |
| <i>Coracina_bicolor</i>         | 1 | 1 | 1 | 1 |
| <i>Coracina_boyeri</i>          | 1 | 1 | 1 | 1 |
| <i>Coracina_caeruleogrisea</i>  | 1 | 1 | 1 | 1 |
| <i>Coracina_caesia</i>          | 1 | 1 | 1 | 1 |
| <i>Coracina_caledonica</i>      | 1 | 1 | 1 | 1 |
| <i>Coracina_ceramensis</i>      | 1 | 1 | 1 | 1 |
| <i>Coracina_cinerea</i>         | 1 | 1 | 1 | 1 |
| <i>Coracina_coerulescens</i>    | 1 | 1 | 1 | 1 |
| <i>Coracina_dispar</i>          | 1 | 1 | 1 | 1 |
| <i>Coracina_dohertyi</i>        | 1 | 1 | 1 | 1 |
| <i>Coracina_fimbriata</i>       | 1 | 1 | 1 | 1 |
| <i>Coracina_graueri</i>         | 1 | 1 | 1 | 1 |
| <i>Coracina_holopolia</i>       | 1 | 1 | 1 | 1 |
| <i>Coracina_incerta</i>         | 1 | 1 | 1 | 1 |
| <i>Coracina_ingens</i>          | 1 | 1 | 1 | 1 |
| <i>Coracina_larvata</i>         | 1 | 1 | 1 | 1 |
| <i>Coracina_leucopygia</i>      | 1 | 1 | 1 | 1 |
| <i>Coracina_lineata</i>         | 1 | 1 | 1 | 1 |

|                                 |   |   |   |   |
|---------------------------------|---|---|---|---|
| <i>Coracina_longicauda</i>      | 1 | 1 | 1 | 1 |
| <i>Coracina_macei</i>           | 1 | 1 | 1 | 1 |
| <i>Coracina_maxima</i>          | 1 | 1 | 1 | 1 |
| <i>Coracina_mcgregori</i>       | 1 | 1 | 1 | 1 |
| <i>Coracina_melanoptera</i>     | 1 | 1 | 1 | 1 |
| <i>Coracina_melaschistos</i>    | 1 | 1 | 1 | 1 |
| <i>Coracina_mindanensis</i>     | 1 | 1 | 1 | 1 |
| <i>Coracina_montana</i>         | 1 | 1 | 1 | 1 |
| <i>Coracina_morio</i>           | 1 | 1 | 1 | 1 |
| <i>Coracina_newtoni</i>         | 1 | 1 | 1 | 1 |
| <i>Coracina_novaehollandiae</i> | 1 | 1 | 1 | 1 |
| <i>Coracina_ostenta</i>         | 1 | 1 | 1 | 1 |
| <i>Coracina_papuensis</i>       | 1 | 1 | 1 | 1 |
| <i>Coracina_pectoralis</i>      | 1 | 1 | 1 | 1 |
| <i>Coracina_polioptera</i>      | 1 | 1 | 1 | 1 |
| <i>Coracina_remota</i>          | 1 | 1 | 1 | 1 |
| <i>Coracina_salomonis</i>       | 1 | 1 | 1 | 1 |
| <i>Coracina_schistacea</i>      | 1 | 1 | 1 | 1 |
| <i>Coracina_striata</i>         | 1 | 1 | 1 | 1 |
| <i>Coracina_sula</i>            | 1 | 1 | 1 | 1 |
| <i>Coracina_temminckii</i>      | 1 | 1 | 1 | 1 |
| <i>Coracina_tenuirostris</i>    | 1 | 1 | 1 | 1 |
| <i>Coracina_typica</i>          | 1 | 1 | 1 | 1 |
| <i>Coracina_welchmani</i>       | 1 | 1 | 1 | 1 |
| <i>Coracopsis_nigra</i>         | 1 | 1 | 1 | 1 |
| <i>Coracopsis_yasa</i>          | 1 | 1 | 1 | 1 |
| <i>Coracornis_raveni</i>        | 1 | 1 | 1 | 1 |
| <i>Coracornis_sanghirensis</i>  | 1 | 1 | 1 | 1 |
| <i>Coragyps_atratus</i>         | 1 | 1 | 1 | 1 |
| <i>Corapipo_altera</i>          | 1 | 1 | 1 | 1 |
| <i>Corapipo_gutturalis</i>      | 1 | 1 | 1 | 1 |
| <i>Corapipo_leucorrhoea</i>     | 1 | 1 | 1 | 1 |
| <i>Corcorax_melanorhamphos</i>  | 1 | 1 | 1 | 1 |
| <i>Cormobates_leucophaeus</i>   | 1 | 1 | 1 | 1 |
| <i>Cormobates_placens</i>       | 1 | 1 | 1 | 1 |
| <i>Corvinella_corvina</i>       | 1 | 1 | 1 | 1 |
| <i>Corvus_albicollis</i>        | 1 | 1 | 1 | 1 |
| <i>Corvus_albus</i>             | 1 | 1 | 1 | 1 |
| <i>Corvus_bennetti</i>          | 1 | 1 | 1 | 1 |
| <i>Corvus_brachyrhynchus</i>    | 1 | 1 | 1 | 1 |
| <i>Corvus_capensis</i>          | 1 | 1 | 1 | 1 |
| <i>Corvus_caurinus</i>          | 1 | 1 | 1 | 1 |
| <i>Corvus_corax</i>             | 1 | 1 | 1 | 1 |
| <i>Corvus_corone</i>            | 1 | 1 | 1 | 1 |



|                                  |   |   |   |   |
|----------------------------------|---|---|---|---|
| <i>Corvus_coronoides</i>         | 1 | 1 | 1 | 1 |
| <i>Corvus_crassirostris</i>      | 1 | 1 | 1 | 1 |
| <i>Corvus_cryptoleucus</i>       | 1 | 1 | 1 | 1 |
| <i>Corvus_culminatus</i>         | 1 | 1 | 1 | 1 |
| <i>Corvus_dauricus</i>           | 1 | 1 | 1 | 1 |
| <i>Corvus_edithae</i>            | 1 | 1 | 1 | 1 |
| <i>Corvus_enca</i>               | 1 | 1 | 1 | 1 |
| <i>Corvus_florensis</i>          | 1 | 1 | 1 | 1 |
| <i>Corvus_frugilegus</i>         | 1 | 1 | 1 | 1 |
| <i>Corvus_fuscicapillus</i>      | 1 | 1 | 1 | 1 |
| <i>Corvus_hawaiiensis</i>        | 1 | 1 | 1 | 1 |
| <i>Corvus_imparatus</i>          | 1 | 1 | 1 | 1 |
| <i>Corvus_jamaicensis</i>        | 1 | 1 | 1 | 1 |
| <i>Corvus_kubaryi</i>            | 1 | 1 | 1 | 1 |
| <i>Corvus_leucognaphalus</i>     | 1 | 1 | 1 | 1 |
| <i>Corvus_macrorhynchos</i>      | 1 | 1 | 1 | 1 |
| <i>Corvus_meeki</i>              | 1 | 1 | 1 | 1 |
| <i>Corvus_mellori</i>            | 1 | 1 | 1 | 1 |
| <i>Corvus_minutus</i>            | 1 | 1 | 1 | 1 |
| <i>Corvus_monedula</i>           | 1 | 1 | 1 | 1 |
| <i>Corvus_moneduloides</i>       | 1 | 1 | 1 | 1 |
| <i>Corvus_nasicus</i>            | 1 | 1 | 1 | 1 |
| <i>Corvus_orru</i>               | 1 | 1 | 1 | 1 |
| <i>Corvus_ossifragus</i>         | 1 | 1 | 1 | 1 |
| <i>Corvus_palmarum</i>           | 1 | 1 | 1 | 1 |
| <i>Corvus_pectoralis</i>         | 1 | 1 | 1 | 1 |
| <i>Corvus_rhipidurus</i>         | 1 | 1 | 1 | 1 |
| <i>Corvus_ruficollis</i>         | 1 | 1 | 1 | 1 |
| <i>Corvus_sinaloae</i>           | 1 | 1 | 1 | 1 |
| <i>Corvus_splendens</i>          | 1 | 1 | 1 | 1 |
| <i>Corvus_tasmanicus</i>         | 1 | 1 | 1 | 1 |
| <i>Corvus_tristis</i>            | 1 | 1 | 1 | 1 |
| <i>Corvus_typicus</i>            | 1 | 1 | 1 | 1 |
| <i>Corvus_unicolor</i>           | 1 | 1 | 1 | 1 |
| <i>Corvus_validus</i>            | 1 | 1 | 1 | 1 |
| <i>Corvus_violaceus</i>          | 1 | 1 | 1 | 1 |
| <i>Corvus_woodfordi</i>          | 1 | 1 | 1 | 1 |
| <i>Corydon_sumatranus</i>        | 1 | 1 | 1 | 1 |
| <i>Coryphistera_alaudina</i>     | 1 | 1 | 1 | 1 |
| <i>Coryphospingus_cucullatus</i> | 1 | 1 | 1 | 1 |
| <i>Coryphospingus_pileatus</i>   | 1 | 1 | 1 | 1 |
| <i>Corythaeola_cristata</i>      | 1 | 1 | 1 | 1 |
| <i>Corythaixoides_concolor</i>   | 1 | 1 | 1 | 1 |
| <i>Corythaixoides_personata</i>  | 1 | 1 | 1 | 1 |

|                                   |   |   |   |   |
|-----------------------------------|---|---|---|---|
| <i>Corythopis_delalandi</i>       | 1 | 1 | 1 | 1 |
| <i>Corythopis_torquatus</i>       | 1 | 1 | 1 | 1 |
| <i>Coscoroba_coscoroba</i>        | 1 | 1 | 1 | 1 |
| <i>Cosmopsarus_regius</i>         | 1 | 1 | 1 | 1 |
| <i>Cossypha_albicapillus</i>      | 1 | 1 | 1 | 1 |
| <i>Cossypha_anomala</i>           | 1 | 1 | 1 | 1 |
| <i>Cossypha_archeri</i>           | 1 | 1 | 1 | 1 |
| <i>Cossypha_caffra</i>            | 1 | 1 | 1 | 1 |
| <i>Cossypha_cyanocampter</i>      | 1 | 1 | 1 | 1 |
| <i>Cossypha_dichroa</i>           | 1 | 1 | 1 | 1 |
| <i>Cossypha_heuglini</i>          | 1 | 1 | 1 | 1 |
| <i>Cossypha_humeralis</i>         | 1 | 1 | 1 | 1 |
| <i>Cossypha_isabellae</i>         | 1 | 1 | 1 | 1 |
| <i>Cossypha_niveicapilla</i>      | 1 | 1 | 1 | 1 |
| <i>Cossypha_polioptera</i>        | 1 | 1 | 1 | 1 |
| <i>Cossypha_semirufa</i>          | 1 | 1 | 1 | 1 |
| <i>Cossyphicula_roberti</i>       | 1 | 1 | 1 | 1 |
| <i>Cotinga_cayana</i>             | 1 | 1 | 1 | 1 |
| <i>Cotinga_maynana</i>            | 1 | 1 | 1 | 1 |
| <i>Coturnicops_exquisitus</i>     | 1 | 1 | 1 | 1 |
| <i>Coturnicops_noveboracensis</i> | 1 | 1 | 1 | 1 |
| <i>Coturnix_australis</i>         | 1 | 1 | 1 | 1 |
| <i>Coturnix_chinensis</i>         | 1 | 1 | 1 | 1 |
| <i>Coturnix_coturnix</i>          | 1 | 1 | 1 | 1 |
| <i>Coturnix_japonica</i>          | 1 | 1 | 1 | 1 |
| <i>Coturnix_novaezealandiae</i>   | 1 | 1 | 1 | 1 |
| <i>Coturnix_pectoralis</i>        | 1 | 1 | 1 | 1 |
| <i>Coturnix_ypsilophora</i>       | 1 | 1 | 1 | 1 |
| <i>Coua_caerulea</i>              | 1 | 1 | 1 | 1 |
| <i>Coua_cristata</i>              | 1 | 1 | 1 | 1 |
| <i>Coua_cursor</i>                | 1 | 1 | 1 | 1 |
| <i>Coua_reynaudii</i>             | 1 | 1 | 1 | 1 |
| <i>Coua_ruficeps</i>              | 1 | 1 | 1 | 1 |
| <i>Coua_serriana</i>              | 1 | 1 | 1 | 1 |
| <i>Cracticus_nigrogularis</i>     | 1 | 1 | 1 | 1 |
| <i>Cracticus_quoyi</i>            | 1 | 1 | 1 | 1 |
| <i>Cranioleuca_albicapilla</i>    | 1 | 1 | 1 | 1 |
| <i>Cranioleuca_albiceps</i>       | 1 | 1 | 1 | 1 |
| <i>Cranioleuca_antisiensis</i>    | 1 | 1 | 1 | 1 |
| <i>Cranioleuca_baroni</i>         | 1 | 1 | 1 | 1 |
| <i>Cranioleuca_curtata</i>        | 1 | 1 | 1 | 1 |
| <i>Cranioleuca_demissa</i>        | 1 | 1 | 1 | 1 |
| <i>Cranioleuca_erythrope</i>      | 1 | 1 | 1 | 1 |
| <i>Cranioleuca_henricae</i>       | 1 | 1 | 1 | 1 |

|                                       |   |   |   |   |
|---------------------------------------|---|---|---|---|
| <i>Cranioleuca_marcapatae</i>         | 1 | 1 | 1 | 1 |
| <i>Cranioleuca_obsoleta</i>           | 1 | 1 | 1 | 1 |
| <i>Cranioleuca_pyrrhophia</i>         | 1 | 1 | 1 | 1 |
| <i>Cranioleuca_subcristata</i>        | 1 | 1 | 1 | 1 |
| <i>Cranioleuca_sulphurifera</i>       | 1 | 1 | 1 | 1 |
| <i>Cranioleuca_vulpina</i>            | 1 | 1 | 1 | 1 |
| <i>Crateroscelis_robusta</i>          | 1 | 1 | 1 | 1 |
| <i>Crax_alberti</i>                   | 1 | 1 | 1 | 1 |
| <i>Crax_alector</i>                   | 1 | 1 | 1 | 1 |
| <i>Crax_blumenbachii</i>              | 1 | 1 | 1 | 1 |
| <i>Crax_daubentoni</i>                | 1 | 1 | 1 | 1 |
| <i>Crax_fasciolata</i>                | 1 | 1 | 1 | 1 |
| <i>Crax_globulosa</i>                 | 1 | 1 | 1 | 1 |
| <i>Crax_rubra</i>                     | 1 | 1 | 1 | 1 |
| <i>Creagrus_furcatus</i>              | 1 | 1 | 1 | 1 |
| <i>Creatophora_cinerea</i>            | 1 | 1 | 1 | 1 |
| <i>Creurgops_dentatus</i>             | 1 | 1 | 1 | 1 |
| <i>Creurgops_verticalis</i>           | 1 | 1 | 1 | 1 |
| <i>Crex_crex</i>                      | 1 | 1 | 1 | 1 |
| <i>Crinifer_piscator</i>              | 1 | 1 | 1 | 1 |
| <i>Crinifer_zonurus</i>               | 1 | 1 | 1 | 1 |
| <i>Criniferoides_leucogaster</i>      | 1 | 1 | 1 | 1 |
| <i>Criniger_barbatus</i>              | 1 | 1 | 1 | 1 |
| <i>Criniger_bres</i>                  | 1 | 1 | 1 | 1 |
| <i>Criniger_calurus</i>               | 1 | 1 | 1 | 1 |
| <i>Criniger_chloronotus</i>           | 1 | 1 | 1 | 1 |
| <i>Criniger_ndussumensis</i>          | 1 | 1 | 1 | 1 |
| <i>Criniger_ochraceus</i>             | 1 | 1 | 1 | 1 |
| <i>Criniger_pallidus</i>              | 1 | 1 | 1 | 1 |
| <i>Criniger_phaeocephalus</i>         | 1 | 1 | 1 | 1 |
| <i>Crossleyia_xanthophrys</i>         | 1 | 1 | 1 | 1 |
| <i>Crossoptilon_auritum</i>           | 1 | 1 | 1 | 1 |
| <i>Crossoptilon_crossoptilon</i>      | 1 | 1 | 1 | 1 |
| <i>Crossoptilon_mantchuricum</i>      | 1 | 1 | 1 | 1 |
| <i>Crotophaga_ani</i>                 | 1 | 1 | 1 | 1 |
| <i>Crotophaga_major</i>               | 1 | 1 | 1 | 1 |
| <i>Crotophaga_sulcirostris</i>        | 1 | 1 | 1 | 1 |
| <i>Crypsirina_temia</i>               | 1 | 1 | 1 | 1 |
| <i>Cryptospiza_reichenovii</i>        | 1 | 1 | 1 | 1 |
| <i>Cryptospiza_shelleyi</i>           | 1 | 1 | 1 | 1 |
| <i>Cryptosylvicola_randrianasoloi</i> | 1 | 1 | 1 | 1 |
| <i>Crypturellus_obsoletus</i>         | 1 | 1 | 1 | 1 |
| <i>Crypturellus_parvirostris</i>      | 1 | 1 | 1 | 1 |
| <i>Crypturellus_soui</i>              | 1 | 1 | 1 | 1 |

|                                 |   |   |   |   |
|---------------------------------|---|---|---|---|
| <i>Crypturellus_strigulosus</i> | 1 | 1 | 1 | 1 |
| <i>Crypturellus_tataupa</i>     | 1 | 1 | 1 | 1 |
| <i>Crypturellus_undulatus</i>   | 1 | 1 | 1 | 1 |
| <i>Crypturellus_variegatus</i>  | 1 | 1 | 1 | 1 |
| <i>Cuculus_canorus</i>          | 1 | 1 | 1 | 1 |
| <i>Cuculus_fugax</i>            | 1 | 1 | 1 | 1 |
| <i>Cuculus_pallidus</i>         | 1 | 1 | 1 | 1 |
| <i>Cuculus_poliocephalus</i>    | 1 | 1 | 1 | 1 |
| <i>Cuculus_saturatus</i>        | 1 | 1 | 1 | 1 |
| <i>Cuculus_vagans</i>           | 1 | 1 | 1 | 1 |
| <i>Culicicapa_ceylonensis</i>   | 1 | 1 | 1 | 1 |
| <i>Culicicapa_helianthea</i>    | 1 | 1 | 1 | 1 |
| <i>Culicivora_caudacuta</i>     | 1 | 1 | 1 | 1 |
| <i>Curaeus_curaeus</i>          | 1 | 1 | 1 | 1 |
| <i>Cursorius_temminckii</i>     | 1 | 1 | 1 | 1 |
| <i>Cutia_nipalensis</i>         | 1 | 1 | 1 | 1 |
| <i>Cyanerpes_caeruleus</i>      | 1 | 1 | 1 | 1 |
| <i>Cyanerpes_cyaneus</i>        | 1 | 1 | 1 | 1 |
| <i>Cyanerpes_lucidus</i>        | 1 | 1 | 1 | 1 |
| <i>Cyanerpes_nitidus</i>        | 1 | 1 | 1 | 1 |
| <i>Cyanistes_caeruleus</i>      | 1 | 1 | 1 | 1 |
| <i>Cyanistes_cyanus</i>         | 1 | 1 | 1 | 1 |
| <i>Cyanistes_degener</i>        | 1 | 1 | 1 | 1 |
| <i>Cyanistes_flavipectus</i>    | 1 | 1 | 1 | 1 |
| <i>Cyanistes_ombriosus</i>      | 1 | 1 | 1 | 1 |
| <i>Cyanistes_palmensis</i>      | 1 | 1 | 1 | 1 |
| <i>Cyanistes_teneriffae</i>     | 1 | 1 | 1 | 1 |
| <i>Cyanochen_cyanopterus</i>    | 1 | 1 | 1 | 1 |
| <i>Cyanocitta_cristata</i>      | 1 | 1 | 1 | 1 |
| <i>Cyanocitta_stelleri</i>      | 1 | 1 | 1 | 1 |
| <i>Cyanocompsa_brissonii</i>    | 1 | 1 | 1 | 1 |
| <i>Cyanocompsa_cyanoides</i>    | 1 | 1 | 1 | 1 |
| <i>Cyanocompsa_parellina</i>    | 1 | 1 | 1 | 1 |
| <i>Cyanocorax_affinis</i>       | 1 | 1 | 1 | 1 |
| <i>Cyanocorax_beecheii</i>      | 1 | 1 | 1 | 1 |
| <i>Cyanocorax_caeruleus</i>     | 1 | 1 | 1 | 1 |
| <i>Cyanocorax_cayanus</i>       | 1 | 1 | 1 | 1 |
| <i>Cyanocorax_chrysops</i>      | 1 | 1 | 1 | 1 |
| <i>Cyanocorax_cristatellus</i>  | 1 | 1 | 1 | 1 |
| <i>Cyanocorax_cyanomelas</i>    | 1 | 1 | 1 | 1 |
| <i>Cyanocorax_cyanopogon</i>    | 1 | 1 | 1 | 1 |
| <i>Cyanocorax_dickeyi</i>       | 1 | 1 | 1 | 1 |
| <i>Cyanocorax_heilprini</i>     | 1 | 1 | 1 | 1 |
| <i>Cyanocorax_melanocyaneus</i> | 1 | 1 | 1 | 1 |

|                                     |   |   |   |   |
|-------------------------------------|---|---|---|---|
| <i>Cyanocorax_morio</i>             | 1 | 1 | 1 | 1 |
| <i>Cyanocorax_mystacalis</i>        | 1 | 1 | 1 | 1 |
| <i>Cyanocorax_sanblasianus</i>      | 1 | 1 | 1 | 1 |
| <i>Cyanocorax_violaceus</i>         | 1 | 1 | 1 | 1 |
| <i>Cyanocorax_yncas</i>             | 1 | 1 | 1 | 1 |
| <i>Cyanocorax_yucatanicus</i>       | 1 | 1 | 1 | 1 |
| <i>Cyanolanius_madagascarinus</i>   | 1 | 1 | 1 | 1 |
| <i>Cyanoliseus_patagonus</i>        | 1 | 1 | 1 | 1 |
| <i>Cyanoloxia_glaucocaerulea</i>    | 1 | 1 | 1 | 1 |
| <i>Cyanolyca_argentigula</i>        | 1 | 1 | 1 | 1 |
| <i>Cyanolyca_armillata</i>          | 1 | 1 | 1 | 1 |
| <i>Cyanolyca_cucullata</i>          | 1 | 1 | 1 | 1 |
| <i>Cyanolyca_mirabilis</i>          | 1 | 1 | 1 | 1 |
| <i>Cyanolyca_nanus</i>              | 1 | 1 | 1 | 1 |
| <i>Cyanolyca_pulchra</i>            | 1 | 1 | 1 | 1 |
| <i>Cyanolyca_pumilo</i>             | 1 | 1 | 1 | 1 |
| <i>Cyanolyca_turcosa</i>            | 1 | 1 | 1 | 1 |
| <i>Cyanolyca_viridicyana</i>        | 1 | 1 | 1 | 1 |
| <i>Cyanomitra_verticalis</i>        | 1 | 1 | 1 | 1 |
| <i>Cyanopica_cyanus</i>             | 1 | 1 | 1 | 1 |
| <i>Cyanopsitta_spixii</i>           | 1 | 1 | 1 | 1 |
| <i>Cyanoptila_cyanomelana</i>       | 1 | 1 | 1 | 1 |
| <i>Cyanoramphus_auriceps</i>        | 1 | 1 | 1 | 1 |
| <i>Cyanoramphus_forbesi</i>         | 1 | 1 | 1 | 1 |
| <i>Cyanoramphus_malherbi</i>        | 1 | 1 | 1 | 1 |
| <i>Cyanoramphus_novaezealandiae</i> | 1 | 1 | 1 | 1 |
| <i>Cyanoramphus_saisetti</i>        | 1 | 1 | 1 | 1 |
| <i>Cyanoramphus_unicolor</i>        | 1 | 1 | 1 | 1 |
| <i>Cyclarhis_gujanensis</i>         | 1 | 1 | 1 | 1 |
| <i>Cyclopsitta_diophtalma</i>       | 1 | 1 | 1 | 1 |
| <i>Cyclorrhynchus_psittacula</i>    | 1 | 1 | 1 | 1 |
| <i>Cygnus_atratus</i>               | 1 | 1 | 1 | 1 |
| <i>Cygnus_buccinator</i>            | 1 | 1 | 1 | 1 |
| <i>Cygnus_columbianus</i>           | 1 | 1 | 1 | 1 |
| <i>Cygnus_cygnus</i>                | 1 | 1 | 1 | 1 |
| <i>Cygnus_melancoryphus</i>         | 1 | 1 | 1 | 1 |
| <i>Cygnus_olor</i>                  | 1 | 1 | 1 | 1 |
| <i>Cymbilaimus_lineatus</i>         | 1 | 1 | 1 | 1 |
| <i>Cymbilaimus_sanctaemariae</i>    | 1 | 1 | 1 | 1 |
| <i>Cymbirhynchus_macrorhynchos</i>  | 1 | 1 | 1 | 1 |
| <i>Cynanthus_latirostris</i>        | 1 | 1 | 1 | 1 |
| <i>Cynanthus_sordidus</i>           | 1 | 1 | 1 | 1 |
| <i>Cyornis_banyumas</i>             | 1 | 1 | 1 | 1 |
| <i>Cyornis_concretus</i>            | 1 | 1 | 1 | 1 |

|                                     |   |   |   |   |
|-------------------------------------|---|---|---|---|
| <i>Cyornis_hainanus</i>             | 1 | 1 | 1 | 1 |
| <i>Cyornis_poliogenys</i>           | 1 | 1 | 1 | 1 |
| <i>Cyornis_rubeculoides</i>         | 1 | 1 | 1 | 1 |
| <i>Cyornis_rufigastra</i>           | 1 | 1 | 1 | 1 |
| <i>Cyornis_unicolor</i>             | 1 | 1 | 1 | 1 |
| <i>Cyphorhinus_arada</i>            | 1 | 1 | 1 | 1 |
| <i>Cypseloides_niger</i>            | 1 | 1 | 1 | 1 |
| <i>Cypseloides_phelpsi</i>          | 1 | 1 | 1 | 1 |
| <i>Cypseloides_rutilus</i>          | 1 | 1 | 1 | 1 |
| <i>Cypsiurus_balasiensis</i>        | 1 | 1 | 1 | 1 |
| <i>Cypsiurus_parvus</i>             | 1 | 1 | 1 | 1 |
| <i>Cypsnagra_hirundinacea</i>       | 1 | 1 | 1 | 1 |
| <i>Cyrtonyx_montezumae</i>          | 1 | 1 | 1 | 1 |
| <i>Dacelo_gaudichaud</i>            | 1 | 1 | 1 | 1 |
| <i>Dacelo_leachi</i>                | 1 | 1 | 1 | 1 |
| <i>Dacelo_novaeguineae</i>          | 1 | 1 | 1 | 1 |
| <i>Dacnis_cayana</i>                | 1 | 1 | 1 | 1 |
| <i>Dacnis_venusta</i>               | 1 | 1 | 1 | 1 |
| <i>Damophila_julie</i>              | 1 | 1 | 1 | 1 |
| <i>Daphoenositta_chrysoptera</i>    | 1 | 1 | 1 | 1 |
| <i>Daption_capense</i>              | 1 | 1 | 1 | 1 |
| <i>Daptrius_americanus</i>          | 1 | 1 | 1 | 1 |
| <i>Daptrius_ater</i>                | 1 | 1 | 1 | 1 |
| <i>Dasyornis_brachypterus</i>       | 1 | 1 | 1 | 1 |
| <i>Dasyornis_broadbenti</i>         | 1 | 1 | 1 | 1 |
| <i>Deconychura_longicauda</i>       | 1 | 1 | 1 | 1 |
| <i>Delichon_dasypus</i>             | 1 | 1 | 1 | 1 |
| <i>Delichon_nipalensis</i>          | 1 | 1 | 1 | 1 |
| <i>Delichon_urbicum</i>             | 1 | 1 | 1 | 1 |
| <i>Delothraupis_castaneiventris</i> | 1 | 1 | 1 | 1 |
| <i>Deltarhynchus_flammulatus</i>    | 1 | 1 | 1 | 1 |
| <i>Dendragapus_obscurus</i>         | 1 | 1 | 1 | 1 |
| <i>Dendrexetastes_rufigula</i>      | 1 | 1 | 1 | 1 |
| <i>Dendrocincla_anabatina</i>       | 1 | 1 | 1 | 1 |
| <i>Dendrocincla_fuliginosa</i>      | 1 | 1 | 1 | 1 |
| <i>Dendrocincla_homochroa</i>       | 1 | 1 | 1 | 1 |
| <i>Dendrocincla_merula</i>          | 1 | 1 | 1 | 1 |
| <i>Dendrocincla_turdina</i>         | 1 | 1 | 1 | 1 |
| <i>Dendrocincla_tyrannina</i>       | 1 | 1 | 1 | 1 |
| <i>Dendrocitta_formosae</i>         | 1 | 1 | 1 | 1 |
| <i>Dendrocitta_frontalis</i>        | 1 | 1 | 1 | 1 |
| <i>Dendrocitta_vagabunda</i>        | 1 | 1 | 1 | 1 |
| <i>Dendrocolaptes_certhia</i>       | 1 | 1 | 1 | 1 |
| <i>Dendrocolaptes_picumnus</i>      | 1 | 1 | 1 | 1 |

|                                    |   |   |   |   |
|------------------------------------|---|---|---|---|
| <i>Dendrocolaptes platyrostris</i> | 1 | 1 | 1 | 1 |
| <i>Dendrocolaptes sanctithomae</i> | 1 | 1 | 1 | 1 |
| <i>Dendrocopos canicapillus</i>    | 1 | 1 | 1 | 1 |
| <i>Dendrocopos hyperythrus</i>     | 1 | 1 | 1 | 1 |
| <i>Dendrocopos kizuki</i>          | 1 | 1 | 1 | 1 |
| <i>Dendrocopos leucotos</i>        | 1 | 1 | 1 | 1 |
| <i>Dendrocopos macei</i>           | 1 | 1 | 1 | 1 |
| <i>Dendrocopos maculatus</i>       | 1 | 1 | 1 | 1 |
| <i>Dendrocopos mahrattensis</i>    | 1 | 1 | 1 | 1 |
| <i>Dendrocopos major</i>           | 1 | 1 | 1 | 1 |
| <i>Dendrocopos medius</i>          | 1 | 1 | 1 | 1 |
| <i>Dendrocopos minor</i>           | 1 | 1 | 1 | 1 |
| <i>Dendrocopos moluccensis</i>     | 1 | 1 | 1 | 1 |
| <i>Dendrocopos syriacus</i>        | 1 | 1 | 1 | 1 |
| <i>Dendrocygna arborea</i>         | 1 | 1 | 1 | 1 |
| <i>Dendrocygna arcuata</i>         | 1 | 1 | 1 | 1 |
| <i>Dendrocygna autumnalis</i>      | 1 | 1 | 1 | 1 |
| <i>Dendrocygna bicolor</i>         | 1 | 1 | 1 | 1 |
| <i>Dendrocygna eytoni</i>          | 1 | 1 | 1 | 1 |
| <i>Dendrocygna guttata</i>         | 1 | 1 | 1 | 1 |
| <i>Dendrocygna javanica</i>        | 1 | 1 | 1 | 1 |
| <i>Dendrocygna viduata</i>         | 1 | 1 | 1 | 1 |
| <i>Dendropicos elliotii</i>        | 1 | 1 | 1 | 1 |
| <i>Dendropicos fuscescens</i>      | 1 | 1 | 1 | 1 |
| <i>Dendropicos goertae</i>         | 1 | 1 | 1 | 1 |
| <i>Dendropicos griseocephalus</i>  | 1 | 1 | 1 | 1 |
| <i>Dendropicos pyrrhogaster</i>    | 1 | 1 | 1 | 1 |
| <i>Deropterus accipitrinus</i>     | 1 | 1 | 1 | 1 |
| <i>Dicaeum aeneum</i>              | 1 | 1 | 1 | 1 |
| <i>Dicaeum agile</i>               | 1 | 1 | 1 | 1 |
| <i>Dicaeum anthonyi</i>            | 1 | 1 | 1 | 1 |
| <i>Dicaeum aureolimbatum</i>       | 1 | 1 | 1 | 1 |
| <i>Dicaeum australe</i>            | 1 | 1 | 1 | 1 |
| <i>Dicaeum bicolor</i>             | 1 | 1 | 1 | 1 |
| <i>Dicaeum celebicum</i>           | 1 | 1 | 1 | 1 |
| <i>Dicaeum chrysorrheum</i>        | 1 | 1 | 1 | 1 |
| <i>Dicaeum concolor</i>            | 1 | 1 | 1 | 1 |
| <i>Dicaeum cruentatum</i>          | 1 | 1 | 1 | 1 |
| <i>Dicaeum everetti</i>            | 1 | 1 | 1 | 1 |
| <i>Dicaeum eximium</i>             | 1 | 1 | 1 | 1 |
| <i>Dicaeum geelvinkianum</i>       | 1 | 1 | 1 | 1 |
| <i>Dicaeum hirundinaceum</i>       | 1 | 1 | 1 | 1 |
| <i>Dicaeum hypoleucum</i>          | 1 | 1 | 1 | 1 |
| <i>Dicaeum igniferum</i>           | 1 | 1 | 1 | 1 |

|                                 |   |   |   |   |
|---------------------------------|---|---|---|---|
| <i>Dicaeum_ignipectus</i>       | 1 | 1 | 1 | 1 |
| <i>Dicaeum_melanoxanthum</i>    | 1 | 1 | 1 | 1 |
| <i>Dicaeum_monticolum</i>       | 1 | 1 | 1 | 1 |
| <i>Dicaeum_nigrilore</i>        | 1 | 1 | 1 | 1 |
| <i>Dicaeum_pectorale</i>        | 1 | 1 | 1 | 1 |
| <i>Dicaeum_pygmaeum</i>         | 1 | 1 | 1 | 1 |
| <i>Dicaeum_sanguinolentum</i>   | 1 | 1 | 1 | 1 |
| <i>Dicaeum_trigonostigma</i>    | 1 | 1 | 1 | 1 |
| <i>Dicaeum_tristrami</i>        | 1 | 1 | 1 | 1 |
| <i>Dichrozona_cincta</i>        | 1 | 1 | 1 | 1 |
| <i>Dicrurus_adsimilis</i>       | 1 | 1 | 1 | 1 |
| <i>Dicrurus_aeneus</i>          | 1 | 1 | 1 | 1 |
| <i>Dicrurus_aldabranus</i>      | 1 | 1 | 1 | 1 |
| <i>Dicrurus_annectans</i>       | 1 | 1 | 1 | 1 |
| <i>Dicrurus_atripennis</i>      | 1 | 1 | 1 | 1 |
| <i>Dicrurus_balicassius</i>     | 1 | 1 | 1 | 1 |
| <i>Dicrurus_bracteatus</i>      | 1 | 1 | 1 | 1 |
| <i>Dicrurus_caerulescens</i>    | 1 | 1 | 1 | 1 |
| <i>Dicrurus_forficatus</i>      | 1 | 1 | 1 | 1 |
| <i>Dicrurus_fuscipennis</i>     | 1 | 1 | 1 | 1 |
| <i>Dicrurus_hottentottus</i>    | 1 | 1 | 1 | 1 |
| <i>Dicrurus_leucophaeus</i>     | 1 | 1 | 1 | 1 |
| <i>Dicrurus_ludwigii</i>        | 1 | 1 | 1 | 1 |
| <i>Dicrurus_macrocerus</i>      | 1 | 1 | 1 | 1 |
| <i>Dicrurus_megarhynchus</i>    | 1 | 1 | 1 | 1 |
| <i>Dicrurus_modestus</i>        | 1 | 1 | 1 | 1 |
| <i>Dicrurus_paradiseus</i>      | 1 | 1 | 1 | 1 |
| <i>Dicrurus_remifer</i>         | 1 | 1 | 1 | 1 |
| <i>Dicrurus_waldenii</i>        | 1 | 1 | 1 | 1 |
| <i>Didunculus_strigirostris</i> | 1 | 1 | 1 | 1 |
| <i>Diglossa_albilatera</i>      | 1 | 1 | 1 | 1 |
| <i>Diglossa_baritula</i>        | 1 | 1 | 1 | 1 |
| <i>Diglossa_brunneiventris</i>  | 1 | 1 | 1 | 1 |
| <i>Diglossa_carbonaria</i>      | 1 | 1 | 1 | 1 |
| <i>Diglossa_duidae</i>          | 1 | 1 | 1 | 1 |
| <i>Diglossa_gloriosa</i>        | 1 | 1 | 1 | 1 |
| <i>Diglossa_gloriosissima</i>   | 1 | 1 | 1 | 1 |
| <i>Diglossa_humeralis</i>       | 1 | 1 | 1 | 1 |
| <i>Diglossa_lafresnayii</i>     | 1 | 1 | 1 | 1 |
| <i>Diglossa_major</i>           | 1 | 1 | 1 | 1 |
| <i>Diglossa_mystacalis</i>      | 1 | 1 | 1 | 1 |
| <i>Diglossa_plumbea</i>         | 1 | 1 | 1 | 1 |
| <i>Diglossa_sittoides</i>       | 1 | 1 | 1 | 1 |
| <i>Diglossa_venezuelensis</i>   | 1 | 1 | 1 | 1 |



|                                  |   |   |   |   |
|----------------------------------|---|---|---|---|
| <i>Diglossopis_caerulescens</i>  | 1 | 1 | 1 | 1 |
| <i>Diglossopis_cyanea</i>        | 1 | 1 | 1 | 1 |
| <i>Diglossopis_glauca</i>        | 1 | 1 | 1 | 1 |
| <i>Diglossopis_indigotica</i>    | 1 | 1 | 1 | 1 |
| <i>Dinemellia_dinemelli</i>      | 1 | 1 | 1 | 1 |
| <i>Dinopium_javanense</i>        | 1 | 1 | 1 | 1 |
| <i>Dinopium_shorii</i>           | 1 | 1 | 1 | 1 |
| <i>Dinornis_novaezealandiae</i>  | 1 | 1 | - | 1 |
| <i>Dinornis_robustus</i>         | 1 | 1 | - | 1 |
| <i>Diomedea_amsterdamensis</i>   | 1 | 1 | 1 | 1 |
| <i>Diomedea_antipodensis</i>     | 1 | 1 | 1 | 1 |
| <i>Diomedea_chrysostoma</i>      | 1 | 1 | 1 | 1 |
| <i>Diomedea_dabbenena</i>        | 1 | 1 | 1 | 1 |
| <i>Diomedea_epomophora</i>       | 1 | 1 | 1 | 1 |
| <i>Diomedea_exulans</i>          | 1 | 1 | 1 | 1 |
| <i>Diopsittaca_nobilis</i>       | 1 | 1 | 1 | 1 |
| <i>Diphyllodes_magnificus</i>    | 1 | 1 | 1 | 1 |
| <i>Diphyllodes_respublica</i>    | 1 | 1 | 1 | 1 |
| <i>Discosura_conversii</i>       | 1 | 1 | 1 | 1 |
| <i>Discosura_langsdorffi</i>     | 1 | 1 | 1 | 1 |
| <i>Discosura_longicaudus</i>     | 1 | 1 | 1 | 1 |
| <i>Discosura_popelairii</i>      | 1 | 1 | 1 | 1 |
| <i>Diuca_diuca</i>               | 1 | 1 | 1 | 1 |
| <i>Dives_dives</i>               | 1 | 1 | 1 | 1 |
| <i>Dives_warczewiczi</i>         | 1 | 1 | 1 | 1 |
| <i>Dolichonyx_oryzivorus</i>     | 1 | 1 | 1 | 1 |
| <i>Doliornis_sclateri</i>        | 1 | 1 | 1 | 1 |
| <i>Dolospingus_fringilloides</i> | 1 | 1 | 1 | 1 |
| <i>Donacobius_atricapilla</i>    | 1 | 1 | 1 | 1 |
| <i>Donacospiza_albifrons</i>     | 1 | 1 | 1 | 1 |
| <i>Doryfera_johannae</i>         | 1 | 1 | 1 | 1 |
| <i>Doryfera_ludoviciae</i>       | 1 | 1 | 1 | 1 |
| <i>Drepanoptila_holosericea</i>  | 1 | 1 | 1 | 1 |
| <i>Drepanornis_bruijnii</i>      | 1 | 1 | 1 | 1 |
| <i>Dromaeocercus_brunneus</i>    | 1 | 1 | 1 | 1 |
| <i>Dromaius_novaehollandiae</i>  | 1 | 1 | 1 | 1 |
| <i>Dromas_ardeola</i>            | 1 | 1 | 1 | 1 |
| <i>Dromococcyx_phasianellus</i>  | 1 | 1 | 1 | 1 |
| <i>Drymodes_brunneopygia</i>     | 1 | 1 | 1 | 1 |
| <i>Dryophila_caudata</i>         | 1 | 1 | 1 | 1 |
| <i>Dryophila_devillei</i>        | 1 | 1 | 1 | 1 |
| <i>Dryophila_ferruginea</i>      | 1 | 1 | 1 | 1 |
| <i>Dryophila_genei</i>           | 1 | 1 | 1 | 1 |
| <i>Dryophila_ochropyga</i>       | 1 | 1 | 1 | 1 |

|                                  |   |   |   |   |
|----------------------------------|---|---|---|---|
| <i>Dryophila_rubricollis</i>     | 1 | 1 | 1 | 1 |
| <i>Dryophila_squamata</i>        | 1 | 1 | 1 | 1 |
| <i>Dryornis_bridgesii</i>        | 1 | 1 | 1 | 1 |
| <i>Dryocopus_lineatus</i>        | 1 | 1 | 1 | 1 |
| <i>Dryocopus_martius</i>         | 1 | 1 | 1 | 1 |
| <i>Dryocopus_pileatus</i>        | 1 | 1 | 1 | 1 |
| <i>Dryoscopus_cubla</i>          | 1 | 1 | 1 | 1 |
| <i>Dryoscopus_gambensis</i>      | 1 | 1 | 1 | 1 |
| <i>Dryotriorchis_spectabilis</i> | 1 | 1 | 1 | 1 |
| <i>Dubusia_taeniata</i>          | 1 | 1 | 1 | 1 |
| <i>Ducula_aenea</i>              | 1 | 1 | 1 | 1 |
| <i>Ducula_bicolor</i>            | 1 | 1 | 1 | 1 |
| <i>Ducula_melanochroa</i>        | 1 | 1 | 1 | 1 |
| <i>Ducula_pacifica</i>           | 1 | 1 | 1 | 1 |
| <i>Ducula_pinon</i>              | 1 | 1 | 1 | 1 |
| <i>Ducula_pistrinaria</i>        | 1 | 1 | 1 | 1 |
| <i>Ducula_rubicera</i>           | 1 | 1 | 1 | 1 |
| <i>Ducula_rufigaster</i>         | 1 | 1 | 1 | 1 |
| <i>Ducula_zoeae</i>              | 1 | 1 | 1 | 1 |
| <i>Dulus_dominicus</i>           | 1 | 1 | 1 | 1 |
| <i>Dumetella_carolinensis</i>    | 1 | 1 | 1 | 1 |
| <i>Dumetia_hyperythra</i>        | 1 | 1 | 1 | 1 |
| <i>Dyaphorophyia_blissetti</i>   | 1 | 1 | 1 | 1 |
| <i>Dyaphorophyia_castanea</i>    | 1 | 1 | 1 | 1 |
| <i>Dyaphorophyia_chalybea</i>    | 1 | 1 | 1 | 1 |
| <i>Dyaphorophyia_concreta</i>    | 1 | 1 | 1 | 1 |
| <i>Dyaphorophyia_jamesoni</i>    | 1 | 1 | 1 | 1 |
| <i>Dyaphorophyia_tonsa</i>       | 1 | 1 | 1 | 1 |
| <i>Dysithamnus_mentalis</i>      | 1 | 1 | 1 | 1 |
| <i>Dysithamnus_plumbeus</i>      | 1 | 1 | 1 | 1 |
| <i>Dysithamnus_puncticeps</i>    | 1 | 1 | 1 | 1 |
| <i>Eclectus_roratus</i>          | 1 | 1 | 1 | 1 |
| <i>Ectopistes_migratorius</i>    | 1 | 1 | 1 | 1 |
| <i>Egretta_caerulea</i>          | 1 | 1 | 1 | 1 |
| <i>Egretta_eulophotes</i>        | 1 | 1 | 1 | 1 |
| <i>Egretta_garzetta</i>          | 1 | 1 | 1 | 1 |
| <i>Egretta_rufescens</i>         | 1 | 1 | 1 | 1 |
| <i>Egretta_thula</i>             | 1 | 1 | 1 | 1 |
| <i>Egretta_tricolor</i>          | 1 | 1 | 1 | 1 |
| <i>Elaenia_albiceps</i>          | 1 | 1 | 1 | 1 |
| <i>Elaenia_cherriei</i>          | 1 | 1 | 1 | 1 |
| <i>Elaenia_chiriquensis</i>      | 1 | 1 | 1 | 1 |
| <i>Elaenia_cristata</i>          | 1 | 1 | 1 | 1 |
| <i>Elaenia_dayi</i>              | 1 | 1 | 1 | 1 |

|                                    |   |   |   |   |
|------------------------------------|---|---|---|---|
| <i>Elaenia fallax</i>              | 1 | 1 | 1 | 1 |
| <i>Elaenia flavogaster</i>         | 1 | 1 | 1 | 1 |
| <i>Elaenia frantzii</i>            | 1 | 1 | 1 | 1 |
| <i>Elaenia gigas</i>               | 1 | 1 | 1 | 1 |
| <i>Elaenia martinica</i>           | 1 | 1 | 1 | 1 |
| <i>Elaenia mesoleuca</i>           | 1 | 1 | 1 | 1 |
| <i>Elaenia obscura</i>             | 1 | 1 | 1 | 1 |
| <i>Elaenia olivina</i>             | 1 | 1 | 1 | 1 |
| <i>Elaenia pallatangae</i>         | 1 | 1 | 1 | 1 |
| <i>Elaenia parvirostris</i>        | 1 | 1 | 1 | 1 |
| <i>Elaenia pelzelni</i>            | 1 | 1 | 1 | 1 |
| <i>Elaenia ruficeps</i>            | 1 | 1 | 1 | 1 |
| <i>Elaenia sordida</i>             | 1 | 1 | 1 | 1 |
| <i>Elaenia spectabilis</i>         | 1 | 1 | 1 | 1 |
| <i>Elaenia strepera</i>            | 1 | 1 | 1 | 1 |
| <i>Elanoides forficatus</i>        | 1 | 1 | 1 | 1 |
| <i>Elanus caeruleus</i>            | 1 | 1 | 1 | 1 |
| <i>Elanus leucurus</i>             | 1 | 1 | 1 | 1 |
| <i>Eleoscytalopus indigoticus</i>  | 1 | 1 | 1 | 1 |
| <i>Eleoscytalopus psychopompus</i> | 1 | 1 | 1 | 1 |
| <i>Eleothreptus anomalus</i>       | 1 | 1 | 1 | 1 |
| <i>Elminia albicauda</i>           | 1 | 1 | 1 | 1 |
| <i>Elminia albiventris</i>         | 1 | 1 | 1 | 1 |
| <i>Elminia albonotata</i>          | 1 | 1 | 1 | 1 |
| <i>Elminia longicauda</i>          | 1 | 1 | 1 | 1 |
| <i>Elminia nigromitrata</i>        | 1 | 1 | 1 | 1 |
| <i>Elseyornis melanops</i>         | 1 | 1 | 1 | 1 |
| <i>Elvira chionura</i>             | 1 | 1 | 1 | 1 |
| <i>Elvira cupreiceps</i>           | 1 | 1 | 1 | 1 |
| <i>Emberiza aureola</i>            | 1 | 1 | 1 | 1 |
| <i>Emberiza bruniceps</i>          | 1 | 1 | 1 | 1 |
| <i>Emberiza buehanani</i>          | 1 | 1 | 1 | 1 |
| <i>Emberiza cabanisi</i>           | 1 | 1 | 1 | 1 |
| <i>Emberiza caesia</i>             | 1 | 1 | 1 | 1 |
| <i>Emberiza capensis</i>           | 1 | 1 | 1 | 1 |
| <i>Emberiza chrysophrys</i>        | 1 | 1 | 1 | 1 |
| <i>Emberiza cia</i>                | 1 | 1 | 1 | 1 |
| <i>Emberiza cioides</i>            | 1 | 1 | 1 | 1 |
| <i>Emberiza cirrus</i>             | 1 | 1 | 1 | 1 |
| <i>Emberiza citrinella</i>         | 1 | 1 | 1 | 1 |
| <i>Emberiza elegans</i>            | 1 | 1 | 1 | 1 |
| <i>Emberiza flaviventris</i>       | 1 | 1 | 1 | 1 |
| <i>Emberiza fucata</i>             | 1 | 1 | 1 | 1 |
| <i>Emberiza godlewskii</i>         | 1 | 1 | 1 | 1 |

|                                   |   |   |   |   |
|-----------------------------------|---|---|---|---|
| <i>Emberiza_hortulana</i>         | 1 | 1 | 1 | 1 |
| <i>Emberiza_impetuani</i>         | 1 | 1 | 1 | 1 |
| <i>Emberiza_jankowskii</i>        | 1 | 1 | 1 | 1 |
| <i>Emberiza_leucocephalos</i>     | 1 | 1 | 1 | 1 |
| <i>Emberiza_melanocephala</i>     | 1 | 1 | 1 | 1 |
| <i>Emberiza_pallasi</i>           | 1 | 1 | 1 | 1 |
| <i>Emberiza_pusilla</i>           | 1 | 1 | 1 | 1 |
| <i>Emberiza_rustica</i>           | 1 | 1 | 1 | 1 |
| <i>Emberiza_rutila</i>            | 1 | 1 | 1 | 1 |
| <i>Emberiza_schoeniclus</i>       | 1 | 1 | 1 | 1 |
| <i>Emberiza_spodocephala</i>      | 1 | 1 | 1 | 1 |
| <i>Emberiza_stewarti</i>          | 1 | 1 | 1 | 1 |
| <i>Emberiza_striolata</i>         | 1 | 1 | 1 | 1 |
| <i>Emberiza_sulphurata</i>        | 1 | 1 | 1 | 1 |
| <i>Emberiza_tahapisi</i>          | 1 | 1 | 1 | 1 |
| <i>Emberiza_tristrami</i>         | 1 | 1 | 1 | 1 |
| <i>Emberiza_variabilis</i>        | 1 | 1 | 1 | 1 |
| <i>Emberiza_yessoensis</i>        | 1 | 1 | 1 | 1 |
| <i>Emberizoides_herbicola</i>     | 1 | 1 | 1 | 1 |
| <i>Emberizoides_ypiranganus</i>   | 1 | 1 | 1 | 1 |
| <i>Embernagra_platensis</i>       | 1 | 1 | 1 | 1 |
| <i>Emblema_pictum</i>             | 1 | 1 | 1 | 1 |
| <i>Emeus_crassus</i>              | 1 | 1 | - | 1 |
| <i>Eminia_lepida</i>              | 1 | 1 | 1 | 1 |
| <i>Empidonax_affinis</i>          | 1 | 1 | 1 | 1 |
| <i>Empidonax_albigularis</i>      | 1 | 1 | 1 | 1 |
| <i>Empidonax_alnorum</i>          | 1 | 1 | 1 | 1 |
| <i>Empidonax_atriceps</i>         | 1 | 1 | 1 | 1 |
| <i>Empidonax_difficilis</i>       | 1 | 1 | 1 | 1 |
| <i>Empidonax_flavescens</i>       | 1 | 1 | 1 | 1 |
| <i>Empidonax_flaviventris</i>     | 1 | 1 | 1 | 1 |
| <i>Empidonax_fulvifrons</i>       | 1 | 1 | 1 | 1 |
| <i>Empidonax_hammondii</i>        | 1 | 1 | 1 | 1 |
| <i>Empidonax_minimus</i>          | 1 | 1 | 1 | 1 |
| <i>Empidonax_oberholseri</i>      | 1 | 1 | 1 | 1 |
| <i>Empidonax_occidentalis</i>     | 1 | 1 | 1 | 1 |
| <i>Empidonax_traillii</i>         | 1 | 1 | 1 | 1 |
| <i>Empidonax_virescens</i>        | 1 | 1 | 1 | 1 |
| <i>Empidonax_wrightii</i>         | 1 | 1 | 1 | 1 |
| <i>Empidonomus_varius</i>         | 1 | 1 | 1 | 1 |
| <i>Empidonis_semipartitus</i>     | 1 | 1 | 1 | 1 |
| <i>Enicognathus_leptorhynchus</i> | 1 | 1 | 1 | 1 |
| <i>Enicurus_leschenaulti</i>      | 1 | 1 | 1 | 1 |
| <i>Enicurus_maculatus</i>         | 1 | 1 | 1 | 1 |

|                                      |   |   |   |   |
|--------------------------------------|---|---|---|---|
| <i>Enicurus_ruficapillus</i>         | 1 | 1 | 1 | 1 |
| <i>Enicurus_schistaceus</i>          | 1 | 1 | 1 | 1 |
| <i>Enicurus_scouleri</i>             | 1 | 1 | 1 | 1 |
| <i>Enodes_erythrophris</i>           | 1 | 1 | 1 | 1 |
| <i>Ensifera_ensifera</i>             | 1 | 1 | 1 | 1 |
| <i>Entomodestes_coracinus</i>        | 1 | 1 | 1 | 1 |
| <i>Entomodestes_leucotis</i>         | 1 | 1 | 1 | 1 |
| <i>Entomyzon_cyanotis</i>            | 1 | 1 | 1 | 1 |
| <i>Eolophus_roseicapillus</i>        | 1 | 1 | 1 | 1 |
| <i>Eophona_migratoria</i>            | 1 | 1 | 1 | 1 |
| <i>Eophona_personata</i>             | 1 | 1 | 1 | 1 |
| <i>Eopsaltria_australis</i>          | 1 | 1 | 1 | 1 |
| <i>Eopsaltria_georgiana</i>          | 1 | 1 | 1 | 1 |
| <i>Eopsaltria_griseogularis</i>      | 1 | 1 | 1 | 1 |
| <i>Eos_bornea</i>                    | 1 | 1 | 1 | 1 |
| <i>Eos_cyanogenia</i>                | 1 | 1 | 1 | 1 |
| <i>Eos_reticulata</i>                | 1 | 1 | 1 | 1 |
| <i>Eos_squamata</i>                  | 1 | 1 | 1 | 1 |
| <i>Ephippiorhynchus_asiaticus</i>    | 1 | 1 | 1 | 1 |
| <i>Ephippiorhynchus_senegalensis</i> | 1 | 1 | 1 | 1 |
| <i>Epimachus_albertisi</i>           | 1 | 1 | 1 | 1 |
| <i>Epimachus_fastuosus</i>           | 1 | 1 | 1 | 1 |
| <i>Epimachus_meyeri</i>              | 1 | 1 | 1 | 1 |
| <i>Epinecrophylla_erythrura</i>      | 1 | 1 | 1 | 1 |
| <i>Epinecrophylla_fulviventris</i>   | 1 | 1 | 1 | 1 |
| <i>Epinecrophylla_gutturalis</i>     | 1 | 1 | 1 | 1 |
| <i>Epinecrophylla_haematonota</i>    | 1 | 1 | 1 | 1 |
| <i>Epinecrophylla_leucophthalma</i>  | 1 | 1 | 1 | 1 |
| <i>Epinecrophylla_ornata</i>         | 1 | 1 | 1 | 1 |
| <i>Epinecrophylla_spodionota</i>     | 1 | 1 | 1 | 1 |
| <i>Epthianura_albifrons</i>          | 1 | 1 | 1 | 1 |
| <i>Epthianura_aurifrons</i>          | 1 | 1 | 1 | 1 |
| <i>Epthianura_crocea</i>             | 1 | 1 | 1 | 1 |
| <i>Epthianura_tricolor</i>           | 1 | 1 | 1 | 1 |
| <i>Eremalauda_starki</i>             | 1 | 1 | 1 | 1 |
| <i>Eremobius_phoenicurus</i>         | 1 | 1 | 1 | 1 |
| <i>Eremomela_gregalis</i>            | 1 | 1 | 1 | 1 |
| <i>Eremophila_alpestris</i>          | 1 | 1 | 1 | 1 |
| <i>Eremophila_bilopha</i>            | 1 | 1 | 1 | 1 |
| <i>Eremopsaltria_mongolica</i>       | 1 | 1 | 1 | 1 |
| <i>Eremopterix_nigriceps</i>         | 1 | 1 | 1 | 1 |
| <i>Eremopterix_verticalis</i>        | 1 | 1 | 1 | 1 |
| <i>Eriocnemis_alinae</i>             | 1 | 1 | 1 | 1 |
| <i>Eriocnemis_cupreovertris</i>      | 1 | 1 | 1 | 1 |

|                                |   |   |   |   |
|--------------------------------|---|---|---|---|
| <i>Eriocnemis glaucopoides</i> | 1 | 1 | 1 | 1 |
| <i>Eriocnemis luciani</i>      | 1 | 1 | 1 | 1 |
| <i>Eriocnemis mosquera</i>     | 1 | 1 | 1 | 1 |
| <i>Eriocnemis nigrivestis</i>  | 1 | 1 | 1 | 1 |
| <i>Eriocnemis vestita</i>      | 1 | 1 | 1 | 1 |
| <i>Erithacus akahige</i>       | 1 | 1 | 1 | 1 |
| <i>Erithacus komadori</i>      | 1 | 1 | 1 | 1 |
| <i>Erithacus rubecula</i>      | 1 | 1 | 1 | 1 |
| <i>Erpornis zantholeuca</i>    | 1 | 1 | 1 | 1 |
| <i>Erythrocercus mccallii</i>  | 1 | 1 | 1 | 1 |
| <i>Erythrogonys cinctus</i>    | 1 | 1 | 1 | 1 |
| <i>Erythropitta arquata</i>    | 1 | 1 | 1 | 1 |
| <i>Erythropitta granatina</i>  | 1 | 1 | 1 | 1 |
| <i>Erythropitta kochi</i>      | 1 | 1 | 1 | 1 |
| <i>Erythropitta venusta</i>    | 1 | 1 | 1 | 1 |
| <i>Erythrura gouldiae</i>      | 1 | 1 | 1 | 1 |
| <i>Erythrura prasina</i>       | 1 | 1 | 1 | 1 |
| <i>Erythrura trichroa</i>      | 1 | 1 | 1 | 1 |
| <i>Erythrura tricolor</i>      | 1 | 1 | 1 | 1 |
| <i>Estrilda astrild</i>        | 1 | 1 | 1 | 1 |
| <i>Estrilda atricapilla</i>    | 1 | 1 | 1 | 1 |
| <i>Estrilda caerulescens</i>   | 1 | 1 | 1 | 1 |
| <i>Estrilda erythronotos</i>   | 1 | 1 | 1 | 1 |
| <i>Estrilda melanotis</i>      | 1 | 1 | 1 | 1 |
| <i>Estrilda melpoda</i>        | 1 | 1 | 1 | 1 |
| <i>Estrilda nonnula</i>        | 1 | 1 | 1 | 1 |
| <i>Estrilda paludicola</i>     | 1 | 1 | 1 | 1 |
| <i>Estrilda perreini</i>       | 1 | 1 | 1 | 1 |
| <i>Estrilda quartinia</i>      | 1 | 1 | 1 | 1 |
| <i>Estrilda rhodopyga</i>      | 1 | 1 | 1 | 1 |
| <i>Estrilda troglodytes</i>    | 1 | 1 | 1 | 1 |
| <i>Euaegotheles crinifrons</i> | 1 | 1 | 1 | 1 |
| <i>Euaegotheles insignis</i>   | 1 | 1 | 1 | 1 |
| <i>Euaegotheles tatei</i>      | 1 | 1 | 1 | 1 |
| <i>Eubucco bourcierii</i>      | 1 | 1 | 1 | 1 |
| <i>Eubucco richardsoni</i>     | 1 | 1 | 1 | 1 |
| <i>Eucometis penicillata</i>   | 1 | 1 | 1 | 1 |
| <i>Eudocimus albus</i>         | 1 | 1 | 1 | 1 |
| <i>Eudocimus ruber</i>         | 1 | 1 | 1 | 1 |
| <i>Eudromia elegans</i>        | 1 | 1 | 1 | 1 |
| <i>Eudynamys scolopaceus</i>   | 1 | 1 | 1 | 1 |
| <i>Eudynamys taitensis</i>     | 1 | 1 | 1 | 1 |
| <i>Eudytes chrysocome</i>      | 1 | 1 | 1 | 1 |
| <i>Eudytes chrysolophus</i>    | 1 | 1 | 1 | 1 |

|                                |   |   |   |   |
|--------------------------------|---|---|---|---|
| <i>Eudytes_pachyrhynchus</i>   | 1 | 1 | 1 | 1 |
| <i>Eudytes_robustus</i>        | 1 | 1 | 1 | 1 |
| <i>Eudytes_schlegeli</i>       | 1 | 1 | 1 | 1 |
| <i>Eudytes_sclateri</i>        | 1 | 1 | 1 | 1 |
| <i>Eudiptula_albosignata</i>   | 1 | 1 | 1 | 1 |
| <i>Eudiptula_minor</i>         | 1 | 1 | 1 | 1 |
| <i>Eugenes_fulgens</i>         | 1 | 1 | 1 | 1 |
| <i>Eugerygone_rubra</i>        | 1 | 1 | 1 | 1 |
| <i>Eugralla_paradoxa</i>       | 1 | 1 | 1 | 1 |
| <i>Eulacostoma_nigropectus</i> | 1 | 1 | 1 | 1 |
| <i>Eulampis_holosericeus</i>   | 1 | 1 | 1 | 1 |
| <i>Eulampis_jugularis</i>      | 1 | 1 | 1 | 1 |
| <i>Eulipoa_wallacei</i>        | 1 | 1 | 0 | 1 |
| <i>Eumyias_indigo</i>          | 1 | 1 | 1 | 1 |
| <i>Eumyias_panayensis</i>      | 1 | 1 | 1 | 1 |
| <i>Eumyias_thalassina</i>      | 1 | 1 | 1 | 1 |
| <i>Euneornis_campestris</i>    | 1 | 1 | 1 | 1 |
| <i>Eunymphicus_cornutus</i>    | 1 | 1 | 1 | 1 |
| <i>Eunymphicus_uvaeensis</i>   | 1 | 1 | 1 | 1 |
| <i>Eupetes_macrocerus</i>      | 1 | 1 | 1 | 1 |
| <i>Eupetomena_macroura</i>     | 1 | 1 | 1 | 1 |
| <i>Euphagus_carolinus</i>      | 1 | 1 | 1 | 1 |
| <i>Euphagus_cyanocephalus</i>  | 1 | 1 | 1 | 1 |
| <i>Eupherusa_eximia</i>        | 1 | 1 | 1 | 1 |
| <i>Eupherusa_nigriventris</i>  | 1 | 1 | 1 | 1 |
| <i>Euphonia_affinis</i>        | 1 | 1 | 1 | 1 |
| <i>Euphonia_chlorotica</i>     | 1 | 1 | 1 | 1 |
| <i>Euphonia_cyanocephala</i>   | 1 | 1 | 1 | 1 |
| <i>Euphonia_finschi</i>        | 1 | 1 | 1 | 1 |
| <i>Euphonia_fulvicrissa</i>    | 1 | 1 | 1 | 1 |
| <i>Euphonia_gouldi</i>         | 1 | 1 | 1 | 1 |
| <i>Euphonia_hirundinacea</i>   | 1 | 1 | 1 | 1 |
| <i>Euphonia_laniirostris</i>   | 1 | 1 | 1 | 1 |
| <i>Euphonia_musica</i>         | 1 | 1 | 1 | 1 |
| <i>Euphonia_pectoralis</i>     | 1 | 1 | 1 | 1 |
| <i>Euplectes_afer</i>          | 1 | 1 | 1 | 1 |
| <i>Euplectes_albonotatus</i>   | 1 | 1 | 1 | 1 |
| <i>Euplectes_ardens</i>        | 1 | 1 | 1 | 1 |
| <i>Euplectes_aureus</i>        | 1 | 1 | 1 | 1 |
| <i>Euplectes_axillaris</i>     | 1 | 1 | 1 | 1 |
| <i>Euplectes_capensis</i>      | 1 | 1 | 1 | 1 |
| <i>Euplectes_diadematus</i>    | 1 | 1 | 1 | 1 |
| <i>Euplectes_franciscanus</i>  | 1 | 1 | 1 | 1 |
| <i>Euplectes_gierowii</i>      | 1 | 1 | 1 | 1 |

|                                      |   |   |   |   |
|--------------------------------------|---|---|---|---|
| <i>Euplectes_hartlaubi</i>           | 1 | 1 | 1 | 1 |
| <i>Euplectes_hordeaceus</i>          | 1 | 1 | 1 | 1 |
| <i>Euplectes_jacksoni</i>            | 1 | 1 | 1 | 1 |
| <i>Euplectes_macroura</i>            | 1 | 1 | 1 | 1 |
| <i>Euplectes_nigroventris</i>        | 1 | 1 | 1 | 1 |
| <i>Euplectes_orix</i>                | 1 | 1 | 1 | 1 |
| <i>Euplectes_progne</i>              | 1 | 1 | 1 | 1 |
| <i>Euplectes_psammocromius</i>       | 1 | 1 | 1 | 1 |
| <i>Eupodotis_humilis</i>             | 1 | 1 | 1 | 1 |
| <i>Eupodotis_rueppellii</i>          | 1 | 1 | 1 | 1 |
| <i>Eupodotis_senegalensis</i>        | 1 | 1 | 1 | 1 |
| <i>Euptilotis_neoxenus</i>           | 1 | 1 | 1 | 1 |
| <i>Eurocephalus_anguitimens</i>      | 1 | 1 | 1 | 1 |
| <i>Eurostopodus_argus</i>            | 1 | 1 | 1 | 1 |
| <i>Eurostopodus_macrotis</i>         | 1 | 1 | 1 | 1 |
| <i>Eurostopodus_mystacalis</i>       | 1 | 1 | 1 | 1 |
| <i>Eurostopodus_papuensis</i>        | 1 | 1 | 1 | 1 |
| <i>Euryapteryx_curtus</i>            | 1 | 1 | - | 1 |
| <i>Euryceros_prevostii</i>           | 1 | 1 | 1 | 1 |
| <i>Eurylaimus_javanicus</i>          | 1 | 1 | 1 | 1 |
| <i>Eurylaimus_ochromalus</i>         | 1 | 1 | 1 | 1 |
| <i>Eurylaimus_steerii</i>            | 1 | 1 | 1 | 1 |
| <i>Eurynorhynchus_pygmeus</i>        | 1 | 1 | 1 | 1 |
| <i>Euryptila_subcinnamomea</i>       | 1 | 1 | 1 | 1 |
| <i>Eurypyga_helias</i>               | 1 | 1 | 1 | 1 |
| <i>Eurystomus_glaucurus</i>          | 1 | 1 | 1 | 1 |
| <i>Eurystomus_gularis</i>            | 1 | 1 | 1 | 1 |
| <i>Eurystomus_orientalis</i>         | 1 | 1 | 1 | 1 |
| <i>Euscarthmus_meloryphus</i>        | 1 | 1 | 1 | 1 |
| <i>Euscarthmus_rufomarginatus</i>    | 1 | 1 | 1 | 1 |
| <i>Euschistospiza_cinereovinacea</i> | 1 | 1 | 1 | 1 |
| <i>Euschistospiza_dybowskii</i>      | 1 | 1 | 1 | 1 |
| <i>Eutoxeres_aquila</i>              | 1 | 1 | 1 | 1 |
| <i>Eutoxeres_condamini</i>           | 1 | 1 | 1 | 1 |
| <i>Eutriorchis_astur</i>             | 1 | 1 | 1 | 1 |
| <i>Falcipennis_canadensis</i>        | 1 | 1 | 1 | 1 |
| <i>Falcipennis_falcipennis</i>       | 1 | 1 | 1 | 1 |
| <i>Falco_amurensis</i>               | 1 | 1 | 1 | 1 |
| <i>Falco_araeus</i>                  | 1 | 1 | 1 | 1 |
| <i>Falco_berigora</i>                | 1 | 1 | 1 | 1 |
| <i>Falco_biarmicus</i>               | 1 | 1 | 1 | 1 |
| <i>Falco_cenchroides</i>             | 1 | 1 | 1 | 1 |
| <i>Falco_cherrug</i>                 | 1 | 1 | 1 | 1 |
| <i>Falco_chicquera</i>               | 1 | 1 | 1 | 1 |



|                              |   |   |   |   |
|------------------------------|---|---|---|---|
| <i>Falco_columbarius</i>     | 1 | 1 | 1 | 1 |
| <i>Falco_concolor</i>        | 1 | 1 | 1 | 1 |
| <i>Falco_cuvierii</i>        | 1 | 1 | 1 | 1 |
| <i>Falco_deiroleucus</i>     | 1 | 1 | 1 | 1 |
| <i>Falco_dickinsoni</i>      | 1 | 1 | 1 | 1 |
| <i>Falco_eleonorae</i>       | 1 | 1 | 1 | 1 |
| <i>Falco_femoralis</i>       | 1 | 1 | 1 | 1 |
| <i>Falco_jugger</i>          | 1 | 1 | 1 | 1 |
| <i>Falco_longipennis</i>     | 1 | 1 | 1 | 1 |
| <i>Falco_mexicanus</i>       | 1 | 1 | 1 | 1 |
| <i>Falco_naumanni</i>        | 1 | 1 | 1 | 1 |
| <i>Falco_newtoni</i>         | 1 | 1 | 1 | 1 |
| <i>Falco_novaeseelandiae</i> | 1 | 1 | 1 | 1 |
| <i>Falco_pelegrinoides</i>   | 1 | 1 | 1 | 1 |
| <i>Falco_peregrinus</i>      | 1 | 1 | 1 | 1 |
| <i>Falco_punctatus</i>       | 1 | 1 | 1 | 1 |
| <i>Falco_rufigularis</i>     | 1 | 1 | 1 | 1 |
| <i>Falco_rupicoloides</i>    | 1 | 1 | 1 | 1 |
| <i>Falco_rusticolus</i>      | 1 | 1 | 1 | 1 |
| <i>Falco_sparverius</i>      | 1 | 1 | 1 | 1 |
| <i>Falco_subbuteo</i>        | 1 | 1 | 1 | 1 |
| <i>Falco_subniger</i>        | 1 | 1 | 1 | 1 |
| <i>Falco_tinnunculus</i>     | 1 | 1 | 1 | 1 |
| <i>Falco_vespertinus</i>     | 1 | 1 | 1 | 1 |
| <i>Falco_zoniventris</i>     | 1 | 1 | 1 | 1 |
| <i>Falculea_palliata</i>     | 1 | 1 | 1 | 1 |
| <i>Falcunculus_frontatus</i> | 1 | 1 | 1 | 1 |
| <i>Ficedula_albicilla</i>    | 1 | 1 | 1 | 1 |
| <i>Ficedula_albicollis</i>   | 1 | 1 | 1 | 1 |
| <i>Ficedula_bonthaina</i>    | 1 | 1 | 1 | 1 |
| <i>Ficedula_buruensis</i>    | 1 | 1 | 1 | 1 |
| <i>Ficedula_crypta</i>       | 1 | 1 | 1 | 1 |
| <i>Ficedula_disposita</i>    | 1 | 1 | 1 | 1 |
| <i>Ficedula_dumetoria</i>    | 1 | 1 | 1 | 1 |
| <i>Ficedula_harterti</i>     | 1 | 1 | 1 | 1 |
| <i>Ficedula_hodgsonii</i>    | 1 | 1 | 1 | 1 |
| <i>Ficedula_hyperythra</i>   | 1 | 1 | 1 | 1 |
| <i>Ficedula_hypoleuca</i>    | 1 | 1 | 1 | 1 |
| <i>Ficedula_monileger</i>    | 1 | 1 | 1 | 1 |
| <i>Ficedula_mugimaki</i>     | 1 | 1 | 1 | 1 |
| <i>Ficedula_narcissina</i>   | 1 | 1 | 1 | 1 |
| <i>Ficedula_nigrorufa</i>    | 1 | 1 | 1 | 1 |
| <i>Ficedula_parva</i>        | 1 | 1 | 1 | 1 |
| <i>Ficedula_platenae</i>     | 1 | 1 | 1 | 1 |

|                                   |   |   |   |   |
|-----------------------------------|---|---|---|---|
| <i>Ficedula_rufigula</i>          | 1 | 1 | 1 | 1 |
| <i>Ficedula_sapphira</i>          | 1 | 1 | 1 | 1 |
| <i>Ficedula_semitorquata</i>      | 1 | 1 | 1 | 1 |
| <i>Ficedula_strophiata</i>        | 1 | 1 | 1 | 1 |
| <i>Ficedula_subrubra</i>          | 1 | 1 | 1 | 1 |
| <i>Ficedula_superciliaris</i>     | 1 | 1 | 1 | 1 |
| <i>Ficedula_timorensis</i>        | 1 | 1 | 1 | 1 |
| <i>Ficedula_tricolor</i>          | 1 | 1 | 1 | 1 |
| <i>Ficedula_westermanni</i>       | 1 | 1 | 1 | 1 |
| <i>Ficedula_zanthopygia</i>       | 1 | 1 | 1 | 1 |
| <i>Florisuga_fusca</i>            | 1 | 1 | 1 | 1 |
| <i>Florisuga_mellivora</i>        | 1 | 1 | 1 | 1 |
| <i>Fluvicola_nengeta</i>          | 1 | 1 | 1 | 1 |
| <i>Fluvicola_pica</i>             | 1 | 1 | 1 | 1 |
| <i>Formicarius_analis</i>         | 1 | 1 | 1 | 1 |
| <i>Formicarius_colma</i>          | 1 | 1 | 1 | 1 |
| <i>Formicarius_nigricapillus</i>  | 1 | 1 | 1 | 1 |
| <i>Formicivora_grisea</i>         | 1 | 1 | 1 | 1 |
| <i>Formicivora_melanogaster</i>   | 1 | 1 | 1 | 1 |
| <i>Formicivora_rufa</i>           | 1 | 1 | 1 | 1 |
| <i>Forpus_passerinus</i>          | 1 | 1 | 1 | 1 |
| <i>Forpus_xanthopterygius</i>     | 1 | 1 | 1 | 1 |
| <i>Foudia_aldabrana</i>           | 1 | 1 | 1 | 1 |
| <i>Foudia_flavicans</i>           | 1 | 1 | 1 | 1 |
| <i>Foudia_madagascariensis</i>    | 1 | 1 | 1 | 1 |
| <i>Foudia_rubra</i>               | 1 | 1 | 1 | 1 |
| <i>Foudia_sechellarum</i>         | 1 | 1 | 1 | 1 |
| <i>Foulehaio_carunculata</i>      | 1 | 1 | 1 | 1 |
| <i>Francolinus_adspersus</i>      | 1 | 1 | 1 | 1 |
| <i>Francolinus_afer</i>           | 1 | 1 | 1 | 1 |
| <i>Francolinus_africanus</i>      | 1 | 1 | 1 | 1 |
| <i>Francolinus_bicalcaratus</i>   | 1 | 1 | 1 | 1 |
| <i>Francolinus_capensis</i>       | 1 | 1 | 1 | 1 |
| <i>Francolinus_castaneicollis</i> | 1 | 1 | 1 | 1 |
| <i>Francolinus_coqui</i>          | 1 | 1 | 1 | 1 |
| <i>Francolinus_erckelii</i>       | 1 | 1 | 1 | 1 |
| <i>Francolinus_finschi</i>        | 1 | 1 | 1 | 1 |
| <i>Francolinus_francolinus</i>    | 1 | 1 | 1 | 1 |
| <i>Francolinus_griseostriatus</i> | 1 | 1 | 1 | 1 |
| <i>Francolinus_gularis</i>        | 1 | 1 | 1 | 1 |
| <i>Francolinus_hartlaubi</i>      | 1 | 1 | 1 | 1 |
| <i>Francolinus_hildebrandti</i>   | 1 | 1 | 1 | 1 |
| <i>Francolinus_lathamii</i>       | 1 | 1 | 1 | 1 |
| <i>Francolinus_leucoscepus</i>    | 1 | 1 | 1 | 1 |

|                                   |   |   |   |   |
|-----------------------------------|---|---|---|---|
| <i>Francolinus_levillantii</i>    | 1 | 1 | 1 | 1 |
| <i>Francolinus_levillantoides</i> | 1 | 1 | 1 | 1 |
| <i>Francolinus_nahani</i>         | 1 | 1 | 1 | 1 |
| <i>Francolinus_natalensis</i>     | 1 | 1 | 1 | 1 |
| <i>Francolinus_pintadeanus</i>    | 1 | 1 | 1 | 1 |
| <i>Francolinus_pondicerianus</i>  | 1 | 1 | 1 | 1 |
| <i>Francolinus_sephaena</i>       | 1 | 1 | 1 | 1 |
| <i>Francolinus_shelleyi</i>       | 1 | 1 | 1 | 1 |
| <i>Francolinus_squamatus</i>      | 1 | 1 | 1 | 1 |
| <i>Francolinus_swainsonii</i>     | 1 | 1 | 1 | 1 |
| <i>Fraseria_cinerascens</i>       | 1 | 1 | 1 | 1 |
| <i>Fraseria_ocreata</i>           | 1 | 1 | 1 | 1 |
| <i>Fratercula_arctica</i>         | 1 | 1 | 1 | 1 |
| <i>Fratercula_cirrhata</i>        | 1 | 1 | 1 | 1 |
| <i>Fratercula_corniculata</i>     | 1 | 1 | 1 | 1 |
| <i>Frederickena_unduligera</i>    | 1 | 1 | 1 | 1 |
| <i>Frederickena_viridis</i>       | 1 | 1 | 1 | 1 |
| <i>Fregata_andrewsi</i>           | 1 | 1 | 1 | 1 |
| <i>Fregata_aquila</i>             | 1 | 1 | 1 | 1 |
| <i>Fregata_ariel</i>              | 1 | 1 | 1 | 1 |
| <i>Fregata_magnificens</i>        | 1 | 1 | 1 | 1 |
| <i>Fregata_minor</i>              | 1 | 1 | 1 | 1 |
| <i>Fregetta_grallaria</i>         | 1 | 1 | 1 | 1 |
| <i>Fregetta_tropica</i>           | 1 | 1 | 1 | 1 |
| <i>Fregilupus_varius</i>          | 1 | 1 | 1 | 1 |
| <i>Fringilla_coelebs</i>          | 1 | 1 | 1 | 1 |
| <i>Fringilla_montifringilla</i>   | 1 | 1 | 1 | 1 |
| <i>Fringilla_teydea</i>           | 1 | 1 | 1 | 1 |
| <i>Fulica_americana</i>           | 1 | 1 | 1 | 1 |
| <i>Fulica_ardesiaca</i>           | 1 | 1 | 1 | 1 |
| <i>Fulica_armillata</i>           | 1 | 1 | 1 | 1 |
| <i>Fulica_atra</i>                | 1 | 1 | 1 | 1 |
| <i>Fulica_cornuta</i>             | 1 | 1 | 1 | 1 |
| <i>Fulica_cristata</i>            | 1 | 1 | 1 | 1 |
| <i>Fulica_gigantea</i>            | 1 | 1 | 1 | 1 |
| <i>Fulica_rufifrons</i>           | 1 | 1 | 1 | 1 |
| <i>Fulmarus_glacialis</i>         | 1 | 1 | 1 | 1 |
| <i>Fulmarus_glacialoides</i>      | 1 | 1 | 1 | 1 |
| <i>Furnarius_cristatus</i>        | 1 | 1 | 1 | 1 |
| <i>Furnarius_figulus</i>          | 1 | 1 | 1 | 1 |
| <i>Furnarius_leucopus</i>         | 1 | 1 | 1 | 1 |
| <i>Furnarius_rufus</i>            | 1 | 1 | 1 | 1 |
| <i>Galbula_albirostris</i>        | 1 | 1 | 1 | 1 |
| <i>Galbula_cyanescens</i>         | 1 | 1 | 1 | 1 |

|                                 |   |   |   |   |
|---------------------------------|---|---|---|---|
| <i>Galbula_pastaza</i>          | 1 | 1 | 1 | 1 |
| <i>Galbula_ruficauda</i>        | 1 | 1 | 1 | 1 |
| <i>Galerida_cristata</i>        | 1 | 1 | 1 | 1 |
| <i>Galerida_magnirostris</i>    | 1 | 1 | 1 | 1 |
| <i>Galerida_malabarica</i>      | 1 | 1 | 1 | 1 |
| <i>Galerida_theklae</i>         | 1 | 1 | 1 | 1 |
| <i>Gallicolumba_beccarii</i>    | 1 | 1 | 1 | 1 |
| <i>Gallicolumba_jobiensis</i>   | 1 | 1 | 1 | 1 |
| <i>Gallicolumba_luzonica</i>    | 1 | 1 | 1 | 1 |
| <i>Gallicolumba_tristigmata</i> | 1 | 1 | 1 | 1 |
| <i>Gallinago_gallinago</i>      | 1 | 1 | 1 | 1 |
| <i>Gallinago_media</i>          | 1 | 1 | 1 | 1 |
| <i>Gallinago_megala</i>         | 1 | 1 | 1 | 1 |
| <i>Gallinago_nigripennis</i>    | 1 | 1 | 1 | 1 |
| <i>Gallinago_paraguaiae</i>     | 1 | 1 | 1 | 1 |
| <i>Gallinago_stenura</i>        | 1 | 1 | 1 | 1 |
| <i>Gallinula_chloropus</i>      | 1 | 1 | 1 | 1 |
| <i>Gallinula_melanops</i>       | 1 | 1 | 1 | 1 |
| <i>Gallinula_nesiotis</i>       | 1 | 1 | 1 | 1 |
| <i>Gallirallus_australis</i>    | 1 | 1 | 1 | 1 |
| <i>Gallirallus_insignis</i>     | 1 | 1 | 1 | 1 |
| <i>Gallirallus_okinawae</i>     | 1 | 1 | 1 | 1 |
| <i>Gallirallus_owstoni</i>      | 1 | 1 | 1 | 1 |
| <i>Gallirallus_philippensis</i> | 1 | 1 | 1 | 1 |
| <i>Gallirallus_sylvestris</i>   | 1 | 1 | 1 | 1 |
| <i>Gallirex_porphyreolophus</i> | 1 | 1 | 1 | 1 |
| <i>Galloperdix_lunulata</i>     | 1 | 1 | 1 | 1 |
| <i>Gallus_gallus</i>            | 1 | 1 | 1 | 1 |
| <i>Gallus_lafayetii</i>         | 1 | 1 | 1 | 1 |
| <i>Gallus_sonneratii</i>        | 1 | 1 | 1 | 1 |
| <i>Gallus_varius</i>            | 1 | 1 | 1 | 1 |
| <i>Gampsonyx_swainsonii</i>     | 1 | 1 | 1 | 1 |
| <i>Gampsorhynchus_rufulus</i>   | 1 | 1 | 1 | 1 |
| <i>Garrodia_nereis</i>          | 1 | 1 | 1 | 1 |
| <i>Garrulax_affinis</i>         | 1 | 1 | 1 | 1 |
| <i>Garrulax_albogularis</i>     | 1 | 1 | 1 | 1 |
| <i>Garrulax_canorus</i>         | 1 | 1 | 1 | 1 |
| <i>Garrulax_chinensis</i>       | 1 | 1 | 1 | 1 |
| <i>Garrulax_cineraceus</i>      | 1 | 1 | 1 | 1 |
| <i>Garrulax_davidi</i>          | 1 | 1 | 1 | 1 |
| <i>Garrulax_elliottii</i>       | 1 | 1 | 1 | 1 |
| <i>Garrulax_erythrocephalus</i> | 1 | 1 | 1 | 1 |
| <i>Garrulax_formosus</i>        | 1 | 1 | 1 | 1 |
| <i>Garrulax_leucolophus</i>     | 1 | 1 | 1 | 1 |

|                                 |   |   |   |   |
|---------------------------------|---|---|---|---|
| <i>Garrulax_lineatus</i>        | 1 | 1 | 1 | 1 |
| <i>Garrulax_lunulatus</i>       | 1 | 1 | 1 | 1 |
| <i>Garrulax_maesi</i>           | 1 | 1 | 1 | 1 |
| <i>Garrulax_maximus</i>         | 1 | 1 | 1 | 1 |
| <i>Garrulax_merulinus</i>       | 1 | 1 | 1 | 1 |
| <i>Garrulax_milleti</i>         | 1 | 1 | 1 | 1 |
| <i>Garrulax_milnei</i>          | 1 | 1 | 1 | 1 |
| <i>Garrulax_mitratus</i>        | 1 | 1 | 1 | 1 |
| <i>Garrulax_monileger</i>       | 1 | 1 | 1 | 1 |
| <i>Garrulax_morrisonianus</i>   | 1 | 1 | 1 | 1 |
| <i>Garrulax_nuchalis</i>        | 1 | 1 | 1 | 1 |
| <i>Garrulax_ocellatus</i>       | 1 | 1 | 1 | 1 |
| <i>Garrulax_palliatus</i>       | 1 | 1 | 1 | 1 |
| <i>Garrulax_pectoralis</i>      | 1 | 1 | 1 | 1 |
| <i>Garrulax_perspicillatus</i>  | 1 | 1 | 1 | 1 |
| <i>Garrulax_poecilorhynchus</i> | 1 | 1 | 1 | 1 |
| <i>Garrulax_sannio</i>          | 1 | 1 | 1 | 1 |
| <i>Garrulax_squamatus</i>       | 1 | 1 | 1 | 1 |
| <i>Garrulax_striatus</i>        | 1 | 1 | 1 | 1 |
| <i>Garrulax_subunicolor</i>     | 1 | 1 | 1 | 1 |
| <i>Garrulax_taewanus</i>        | 1 | 1 | 1 | 1 |
| <i>Garrulax_variegatus</i>      | 1 | 1 | 1 | 1 |
| <i>Garrulax_vassali</i>         | 1 | 1 | 1 | 1 |
| <i>Garrulax_virgatus</i>        | 1 | 1 | 1 | 1 |
| <i>Garrulus_glandarius</i>      | 1 | 1 | 1 | 1 |
| <i>Garrulus_lanceolatus</i>     | 1 | 1 | 1 | 1 |
| <i>Garrulus_lidthi</i>          | 1 | 1 | 1 | 1 |
| <i>Gavia_adamsii</i>            | 1 | 1 | 1 | 1 |
| <i>Gavia_arctica</i>            | 1 | 1 | 1 | 1 |
| <i>Gavia_immer</i>              | 1 | 1 | 1 | 1 |
| <i>Gavia_pacifica</i>           | 1 | 1 | 1 | 1 |
| <i>Gavia_stellata</i>           | 1 | 1 | 1 | 1 |
| <i>Gecinulus_grantia</i>        | 1 | 1 | 1 | 1 |
| <i>Gelochelidon_nilotica</i>    | 1 | 1 | 1 | 1 |
| <i>Geococcyx_californianus</i>  | 1 | 1 | 1 | 1 |
| <i>Geococcyx_velox</i>          | 1 | 1 | 1 | 1 |
| <i>Geocolaptes_olivaceus</i>    | 1 | 1 | 1 | 1 |
| <i>Geoffroyus_heteroclitus</i>  | 1 | 1 | 1 | 1 |
| <i>Geopelia_cuneata</i>         | 1 | 1 | 1 | 1 |
| <i>Geopelia_striata</i>         | 1 | 1 | 1 | 1 |
| <i>Geophaps_plumifera</i>       | 1 | 1 | 1 | 1 |
| <i>Geositta_antarctica</i>      | 1 | 1 | 1 | 1 |
| <i>Geositta_crassirostris</i>   | 1 | 1 | 1 | 1 |
| <i>Geositta_cunicularia</i>     | 1 | 1 | 1 | 1 |

|                                  |   |   |   |   |
|----------------------------------|---|---|---|---|
| <i>Geositta_isabellina</i>       | 1 | 1 | 1 | 1 |
| <i>Geositta_maritima</i>         | 1 | 1 | 1 | 1 |
| <i>Geositta_peruviana</i>        | 1 | 1 | 1 | 1 |
| <i>Geositta_poeciloptera</i>     | 1 | 1 | 1 | 1 |
| <i>Geositta_punensis</i>         | 1 | 1 | 1 | 1 |
| <i>Geositta_rufipennis</i>       | 1 | 1 | 1 | 1 |
| <i>Geositta_saxicolina</i>       | 1 | 1 | 1 | 1 |
| <i>Geositta_tenuirostris</i>     | 1 | 1 | 1 | 1 |
| <i>Geospiza_conirostris</i>      | 1 | 1 | 1 | 1 |
| <i>Geospiza_difficilis</i>       | 1 | 1 | 1 | 1 |
| <i>Geospiza_fortis</i>           | 1 | 1 | 1 | 1 |
| <i>Geospiza_fuliginosa</i>       | 1 | 1 | 1 | 1 |
| <i>Geospiza_magnirostris</i>     | 1 | 1 | 1 | 1 |
| <i>Geospiza_scandens</i>         | 1 | 1 | 1 | 1 |
| <i>Geothlypis_aequinoctialis</i> | 1 | 1 | 1 | 1 |
| <i>Geothlypis_beldingi</i>       | 1 | 1 | 1 | 1 |
| <i>Geothlypis_flavovelata</i>    | 1 | 1 | 1 | 1 |
| <i>Geothlypis_formosa</i>        | 1 | 1 | 1 | 1 |
| <i>Geothlypis_nelsoni</i>        | 1 | 1 | 1 | 1 |
| <i>Geothlypis_philadelphia</i>   | 1 | 1 | 1 | 1 |
| <i>Geothlypis_poliocephala</i>   | 1 | 1 | 1 | 1 |
| <i>Geothlypis_rostrata</i>       | 1 | 1 | 1 | 1 |
| <i>Geothlypis_semiflava</i>      | 1 | 1 | 1 | 1 |
| <i>Geothlypis_speciosa</i>       | 1 | 1 | 1 | 1 |
| <i>Geothlypis_tolmiei</i>        | 1 | 1 | 1 | 1 |
| <i>Geothlypis_trichas</i>        | 1 | 1 | 1 | 1 |
| <i>Geotrygon_albifacies</i>      | 1 | 1 | 1 | 1 |
| <i>Geotrygon_chiriquensis</i>    | 1 | 1 | 1 | 1 |
| <i>Geotrygon_costaricensis</i>   | 1 | 1 | 1 | 1 |
| <i>Geotrygon_frenata</i>         | 1 | 1 | 1 | 1 |
| <i>Geotrygon_goldmani</i>        | 1 | 1 | 1 | 1 |
| <i>Geotrygon_lawrencii</i>       | 1 | 1 | 1 | 1 |
| <i>Geotrygon_montana</i>         | 1 | 1 | 1 | 1 |
| <i>Geotrygon_purpurata</i>       | 1 | 1 | 1 | 1 |
| <i>Geotrygon_saphirina</i>       | 1 | 1 | 1 | 1 |
| <i>Geotrygon_veraguensis</i>     | 1 | 1 | 1 | 1 |
| <i>Geotrygon_versicolor</i>      | 1 | 1 | 1 | 1 |
| <i>Geotrygon_violacea</i>        | 1 | 1 | 1 | 1 |
| <i>Geranoaetus_melanoleucus</i>  | 1 | 1 | 1 | 1 |
| <i>Geranospiza_caerulescens</i>  | 1 | 1 | 1 | 1 |
| <i>Geronticus_calvus</i>         | 1 | 1 | 1 | 1 |
| <i>Geronticus_eremita</i>        | 1 | 1 | 1 | 1 |
| <i>Gerygone_chloronota</i>       | 1 | 1 | 1 | 1 |
| <i>Gerygone_chrysogaster</i>     | 1 | 1 | 1 | 1 |

|                                     |   |   |   |   |
|-------------------------------------|---|---|---|---|
| <i>Gerygone_cinerea</i>             | 1 | 1 | 1 | 1 |
| <i>Gerygone_flavolateralis</i>      | 1 | 1 | 1 | 1 |
| <i>Gerygone_fusca</i>               | 1 | 1 | 1 | 1 |
| <i>Gerygone_igata</i>               | 1 | 1 | 1 | 1 |
| <i>Gerygone_inornata</i>            | 1 | 1 | 1 | 1 |
| <i>Gerygone_levigaster</i>          | 1 | 1 | 1 | 1 |
| <i>Gerygone_magnirostris</i>        | 1 | 1 | 1 | 1 |
| <i>Gerygone_modesta</i>             | 1 | 1 | 1 | 1 |
| <i>Gerygone_mouki</i>               | 1 | 1 | 1 | 1 |
| <i>Gerygone_olivacea</i>            | 1 | 1 | 1 | 1 |
| <i>Gerygone_palpebrosa</i>          | 1 | 1 | 1 | 1 |
| <i>Gerygone_ruficollis</i>          | 1 | 1 | 1 | 1 |
| <i>Gerygone_sulphurea</i>           | 1 | 1 | 1 | 1 |
| <i>Gerygone_tenebrosa</i>           | 1 | 1 | 1 | 1 |
| <i>Glareola_maldivarum</i>          | 1 | 1 | 1 | 1 |
| <i>Glareola_nordmanni</i>           | 1 | 1 | 1 | 1 |
| <i>Glareola_nuchalis</i>            | 1 | 1 | 1 | 1 |
| <i>Glareola_pratincola</i>          | 1 | 1 | 1 | 1 |
| <i>Glaucidium_bolivianum</i>        | 1 | 1 | 1 | 1 |
| <i>Glaucidium_brasilianum</i>       | 1 | 1 | 1 | 1 |
| <i>Glaucidium_californicum</i>      | 1 | 1 | 1 | 1 |
| <i>Glaucidium_capense</i>           | 1 | 1 | 1 | 1 |
| <i>Glaucidium_cuculoides</i>        | 1 | 1 | 1 | 1 |
| <i>Glaucidium_gnoma</i>             | 1 | 1 | 1 | 1 |
| <i>Glaucidium_griseiceps</i>        | 1 | 1 | 1 | 1 |
| <i>Glaucidium_hardyi</i>            | 1 | 1 | 1 | 1 |
| <i>Glaucidium_jardinii</i>          | 1 | 1 | 1 | 1 |
| <i>Glaucidium_minutissimum</i>      | 1 | 1 | 1 | 1 |
| <i>Glaucidium_nanum</i>             | 1 | 1 | 1 | 1 |
| <i>Glaucidium_passerinum</i>        | 1 | 1 | 1 | 1 |
| <i>Glaucidium_perlatum</i>          | 1 | 1 | 1 | 1 |
| <i>Glaucidium_peruanum</i>          | 1 | 1 | 1 | 1 |
| <i>Glaucidium_tephronotum</i>       | 1 | 1 | 1 | 1 |
| <i>Glaucis_aeneus</i>               | 1 | 1 | 1 | 1 |
| <i>Glaucis_hirsutus</i>             | 1 | 1 | 1 | 1 |
| <i>Glossopsitta_concinna</i>        | 1 | 1 | 1 | 1 |
| <i>Glossopsitta_porphyrocephala</i> | 1 | 1 | 1 | 1 |
| <i>Glycichaera_fallax</i>           | 1 | 1 | 1 | 1 |
| <i>Glyphorynchus_spirurus</i>       | 1 | 1 | 1 | 1 |
| <i>Gnorimopsar_chopi</i>            | 1 | 1 | 1 | 1 |
| <i>Goura_cristata</i>               | 1 | 1 | 1 | 1 |
| <i>Goura_victoria</i>               | 1 | 1 | 1 | 1 |
| <i>Gracula_ptilogenys</i>           | 1 | 1 | 1 | 1 |
| <i>Gracula_religiosa</i>            | 1 | 1 | 1 | 1 |

|                                             |   |   |   |   |
|---------------------------------------------|---|---|---|---|
| <i>Grafisia_torquata</i>                    | 1 | 1 | 1 | 1 |
| <i>Grallaria_andicolus</i>                  | 1 | 1 | 1 | 1 |
| <i>Grallaria_blakei</i>                     | 1 | 1 | 1 | 1 |
| <i>Grallaria_dignissima</i>                 | 1 | 1 | 1 | 1 |
| <i>Grallaria_eludens</i>                    | 1 | 1 | 1 | 1 |
| <i>Grallaria_guatemalensis</i>              | 1 | 1 | 1 | 1 |
| <i>Grallaria_hypoleuca</i>                  | 1 | 1 | 1 | 1 |
| <i>Grallaria_nuchalis</i>                   | 1 | 1 | 1 | 1 |
| <i>Grallaria_ruficapilla</i>                | 1 | 1 | 1 | 1 |
| <i>Grallaria_rufula</i>                     | 1 | 1 | 1 | 1 |
| <i>Grallaria_squamigera</i>                 | 1 | 1 | 1 | 1 |
| <i>Grallaria_varia</i>                      | 1 | 1 | 1 | 1 |
| <i>Grallaria_watkinsi</i>                   | 1 | 1 | 1 | 1 |
| <i>Grallaricula_flavirostris</i>            | 1 | 1 | 1 | 1 |
| <i>Grallaricula_lineifrons</i>              | 1 | 1 | 1 | 1 |
| <i>Grallaricula_nana</i>                    | 1 | 1 | 1 | 1 |
| <i>Grallina_cyanoleuca</i>                  | 1 | 1 | 1 | 1 |
| <i>Graminicola_bengalensis</i>              | 1 | 1 | 1 | 1 |
| <i>Granatellus_pelzelni</i>                 | 1 | 1 | 1 | 1 |
| <i>Granatellus_sallaei</i>                  | 1 | 1 | 1 | 1 |
| <i>Granatellus_venustus</i>                 | 1 | 1 | 1 | 1 |
| <i>Grantiella_picta</i>                     | 1 | 1 | 1 | 1 |
| <i>Graydidascalus_brachyurus</i>            | 1 | 1 | 1 | 1 |
| <i>Griseotyrannus_aurantioatrocristatus</i> | 1 | 1 | 1 | 1 |
| <i>Grus_americana</i>                       | 1 | 1 | 1 | 1 |
| <i>Grus_antigone</i>                        | 1 | 1 | 1 | 1 |
| <i>Grus_canadensis</i>                      | 1 | 1 | 1 | 1 |
| <i>Grus_carunculatus</i>                    | 1 | 1 | 1 | 1 |
| <i>Grus_grus</i>                            | 1 | 1 | 1 | 1 |
| <i>Grus_japonensis</i>                      | 1 | 1 | 1 | 1 |
| <i>Grus_leucogeranus</i>                    | 1 | 1 | 1 | 1 |
| <i>Grus_monacha</i>                         | 1 | 1 | 1 | 1 |
| <i>Grus_nigricollis</i>                     | 1 | 1 | 1 | 1 |
| <i>Grus_rubicunda</i>                       | 1 | 1 | 1 | 1 |
| <i>Grus_vipio</i>                           | 1 | 1 | 1 | 1 |
| <i>Guaruba_guarouba</i>                     | 1 | 1 | 1 | 1 |
| <i>Gubernatrix_cristata</i>                 | 1 | 1 | 1 | 1 |
| <i>Gubernetes_yetapa</i>                    | 1 | 1 | 1 | 1 |
| <i>Guira_guira</i>                          | 1 | 1 | 1 | 1 |
| <i>Guttera_plumifera</i>                    | 1 | 1 | 1 | 1 |
| <i>Guttera_pucherani</i>                    | 1 | 1 | 1 | 1 |
| <i>Gyalophylax_hellmayri</i>                | 1 | 1 | 1 | 1 |
| <i>Gygis_alba</i>                           | 1 | 1 | 1 | 1 |
| <i>Gymnobucco_calvus</i>                    | 1 | 1 | 1 | 1 |



|                                  |   |   |   |   |
|----------------------------------|---|---|---|---|
| <i>Gymnocichla_nudiceps</i>      | 1 | 1 | 1 | 1 |
| <i>Gymnoderus_foetidus</i>       | 1 | 1 | 1 | 1 |
| <i>Gymnogyps_californianus</i>   | 1 | 1 | 1 | 1 |
| <i>Gymnomystax_mexicanus</i>     | 1 | 1 | 1 | 1 |
| <i>Gymnomyza_samoensis</i>       | 1 | 1 | 1 | 1 |
| <i>Gymnophaps_albertisii</i>     | 1 | 1 | 1 | 1 |
| <i>Gymnopithys_leucaspis</i>     | 1 | 1 | 1 | 1 |
| <i>Gymnopithys_lunulatus</i>     | 1 | 1 | 1 | 1 |
| <i>Gymnopithys_rufigula</i>      | 1 | 1 | 1 | 1 |
| <i>Gymnopithys_salvini</i>       | 1 | 1 | 1 | 1 |
| <i>Gymnorhina_tibicen</i>        | 1 | 1 | 1 | 1 |
| <i>Gymnorhinus_cyanocephalus</i> | 1 | 1 | 1 | 1 |
| <i>Gypaetus_barbatus</i>         | 1 | 1 | 1 | 1 |
| <i>Gypohierax_angolensis</i>     | 1 | 1 | 1 | 1 |
| <i>Gypopsitta_haematotis</i>     | 1 | 1 | 1 | 1 |
| <i>Gypopsitta_pulchra</i>        | 1 | 1 | 1 | 1 |
| <i>Gypopsitta_pyralia</i>        | 1 | 1 | 1 | 1 |
| <i>Gyps_africanus</i>            | 1 | 1 | 1 | 1 |
| <i>Gyps_bengalensis</i>          | 1 | 1 | 1 | 1 |
| <i>Gyps_coprotheres</i>          | 1 | 1 | 1 | 1 |
| <i>Gyps_fulvus</i>               | 1 | 1 | 1 | 1 |
| <i>Gyps_himalayensis</i>         | 1 | 1 | 1 | 1 |
| <i>Gyps_indicus</i>              | 1 | 1 | 1 | 1 |
| <i>Gyps_rueppellii</i>           | 1 | 1 | 1 | 1 |
| <i>Gyps_tenuirostris</i>         | 1 | 1 | 1 | 1 |
| <i>Habia_fuscicauda</i>          | 1 | 1 | 1 | 1 |
| <i>Habia_gutturalis</i>          | 1 | 1 | 1 | 1 |
| <i>Habia_rubica</i>              | 1 | 1 | 1 | 1 |
| <i>Habroptila_wallacii</i>       | 1 | 1 | 1 | 1 |
| <i>Haematoderus_militaris</i>    | 1 | 1 | 1 | 1 |
| <i>Haematopus_ater</i>           | 1 | 1 | 1 | 1 |
| <i>Haematopus_bachmani</i>       | 1 | 1 | 1 | 1 |
| <i>Haematopus_leucopodus</i>     | 1 | 1 | 1 | 1 |
| <i>Haematopus_ostralegus</i>     | 1 | 1 | 1 | 1 |
| <i>Haematopus_palliatu</i>       | 1 | 1 | 1 | 1 |
| <i>Haematopus_unicolor</i>       | 1 | 1 | 1 | 1 |
| <i>Haematortyx_sanguiniceps</i>  | 1 | 1 | 1 | 1 |
| <i>Haematospiza_sipahi</i>       | 1 | 1 | 1 | 1 |
| <i>Halcyon_badia</i>             | 1 | 1 | 1 | 1 |
| <i>Halcyon_coromanda</i>         | 1 | 1 | 1 | 1 |
| <i>Halcyon_leucocephala</i>      | 1 | 1 | 1 | 1 |
| <i>Halcyon_leucopygia</i>        | 1 | 1 | 1 | 1 |
| <i>Halcyon_malimbica</i>         | 1 | 1 | 1 | 1 |
| <i>Halcyon_senegalensis</i>      | 1 | 1 | 1 | 1 |

|                                    |   |   |   |   |
|------------------------------------|---|---|---|---|
| <i>Halcyon_tuta</i>                | 1 | 1 | 1 | 1 |
| <i>Halcyon_winchelli</i>           | 1 | 1 | 1 | 1 |
| <i>Haliaeetus_albicilla</i>        | 1 | 1 | 1 | 1 |
| <i>Haliaeetus_leucocephalus</i>    | 1 | 1 | 1 | 1 |
| <i>Haliaeetus_leucogaster</i>      | 1 | 1 | 1 | 1 |
| <i>Haliaeetus_leucoryphus</i>      | 1 | 1 | 1 | 1 |
| <i>Haliaeetus_pelagicus</i>        | 1 | 1 | 1 | 1 |
| <i>Haliaeetus_sanfordi</i>         | 1 | 1 | 1 | 1 |
| <i>Haliaeetus_vocifer</i>          | 1 | 1 | 1 | 1 |
| <i>Haliaeetus_vociferoides</i>     | 1 | 1 | 1 | 1 |
| <i>Haliastur_indus</i>             | 1 | 1 | 1 | 1 |
| <i>Haliastur_sphenurus</i>         | 1 | 1 | 1 | 1 |
| <i>Halobaena_caerulea</i>          | 1 | 1 | 1 | 1 |
| <i>Hamirostra_melanosternon</i>    | 1 | 1 | 1 | 1 |
| <i>Hapalopsittaca_amazonina</i>    | 1 | 1 | 1 | 1 |
| <i>Haplochelidon_andecola</i>      | 1 | 1 | 1 | 1 |
| <i>Haplophaedia_aureliae</i>       | 1 | 1 | 1 | 1 |
| <i>Haplophaedia_lugens</i>         | 1 | 1 | 1 | 1 |
| <i>Haplospiza_rustica</i>          | 1 | 1 | 1 | 1 |
| <i>Haplospiza_unicolor</i>         | 1 | 1 | 1 | 1 |
| <i>Harpactes_ardens</i>            | 1 | 1 | 1 | 1 |
| <i>Harpactes_diardii</i>           | 1 | 1 | 1 | 1 |
| <i>Harpactes_duvaucelii</i>        | 1 | 1 | 1 | 1 |
| <i>Harpactes_erythrocephalus</i>   | 1 | 1 | 1 | 1 |
| <i>Harpactes_fasciatus</i>         | 1 | 1 | 1 | 1 |
| <i>Harpactes_kasumba</i>           | 1 | 1 | 1 | 1 |
| <i>Harpactes_oreskios</i>          | 1 | 1 | 1 | 1 |
| <i>Harpactes_orrhophaeus</i>       | 1 | 1 | 1 | 1 |
| <i>Harpactes_wardi</i>             | 1 | 1 | 1 | 1 |
| <i>Harpactes_whiteheadi</i>        | 1 | 1 | 1 | 1 |
| <i>Harpagornis_moorei</i>          | 1 | 1 | 1 | 1 |
| <i>Harpagus_bidentatus</i>         | 1 | 1 | 1 | 1 |
| <i>Harpia_harpyja</i>              | 1 | 1 | 1 | 1 |
| <i>Harpyhaliaetus_coronatus</i>    | 1 | 1 | 1 | 1 |
| <i>Harpyhaliaetus_solitarius</i>   | 1 | 1 | 1 | 1 |
| <i>Harpyopsis_novaeguineae</i>     | 1 | 1 | 1 | 1 |
| <i>Hartertula_flavoviridis</i>     | 1 | 1 | 1 | 1 |
| <i>Heinrichia_calligyna</i>        | 1 | 1 | 1 | 1 |
| <i>Heleia_crassirostris</i>        | 1 | 1 | 1 | 1 |
| <i>Heliactin_bilophus</i>          | 1 | 1 | 1 | 1 |
| <i>Heliangelus_amethysticollis</i> | 1 | 1 | 1 | 1 |
| <i>Heliangelus_exortis</i>         | 1 | 1 | 1 | 1 |
| <i>Heliangelus_micraster</i>       | 1 | 1 | 1 | 1 |
| <i>Heliangelus_regalis</i>         | 1 | 1 | 1 | 1 |

|                                      |   |   |   |   |
|--------------------------------------|---|---|---|---|
| <i>Heliangelus_strophianus</i>       | 1 | 1 | 1 | 1 |
| <i>Heliangelus_viola</i>             | 1 | 1 | 1 | 1 |
| <i>Heliobletus_contaminatus</i>      | 1 | 1 | 1 | 1 |
| <i>Heliodoxa_aurescens</i>           | 1 | 1 | 1 | 1 |
| <i>Heliodoxa_branickii</i>           | 1 | 1 | 1 | 1 |
| <i>Heliodoxa_gularis</i>             | 1 | 1 | 1 | 1 |
| <i>Heliodoxa_imperatrix</i>          | 1 | 1 | 1 | 1 |
| <i>Heliodoxa_jacula</i>              | 1 | 1 | 1 | 1 |
| <i>Heliodoxa_leadbeateri</i>         | 1 | 1 | 1 | 1 |
| <i>Heliodoxa_rubinoides</i>          | 1 | 1 | 1 | 1 |
| <i>Heliodoxa_schreibersii</i>        | 1 | 1 | 1 | 1 |
| <i>Heliodoxa_xanthogonys</i>         | 1 | 1 | 1 | 1 |
| <i>Heliolais_erythropterus</i>       | 1 | 1 | 1 | 1 |
| <i>Heliomaster_furcifer</i>          | 1 | 1 | 1 | 1 |
| <i>Heliomaster_longirostris</i>      | 1 | 1 | 1 | 1 |
| <i>Heliopais_personatus</i>          | 1 | 1 | 1 | 1 |
| <i>Heliornis_fulica</i>              | 1 | 1 | 1 | 1 |
| <i>Heliothyx_auritus</i>             | 1 | 1 | 1 | 1 |
| <i>Heliothyx_barroti</i>             | 1 | 1 | 1 | 1 |
| <i>Hellmayrea_gularis</i>            | 1 | 1 | 1 | 1 |
| <i>Helmitheros_vermivorum</i>        | 1 | 1 | 1 | 1 |
| <i>Hemicircus_canente</i>            | 1 | 1 | 1 | 1 |
| <i>Hemignathus_flavus</i>            | 1 | 1 | 1 | 1 |
| <i>Hemignathus_kauaiensis</i>        | 1 | 1 | 1 | 1 |
| <i>Hemignathus_munroi</i>            | 1 | 1 | 1 | 1 |
| <i>Hemignathus_stejnegeri</i>        | 1 | 1 | 1 | 1 |
| <i>Hemignathus_virens</i>            | 1 | 1 | 1 | 1 |
| <i>Hemiphaga_novaeseelandiae</i>     | 1 | 1 | 1 | 1 |
| <i>Hemiprocne_comata</i>             | 1 | 1 | 1 | 1 |
| <i>Hemiprocne_longipennis</i>        | 1 | 1 | 1 | 1 |
| <i>Hemiprocne_mystacea</i>           | 1 | 1 | 1 | 1 |
| <i>Hemipus_hirundinaceus</i>         | 1 | 1 | 1 | 1 |
| <i>Hemipus_picatus</i>               | 1 | 1 | 1 | 1 |
| <i>Hemispingus_atropileus</i>        | 1 | 1 | 1 | 1 |
| <i>Hemispingus_auricularis</i>       | 1 | 1 | 1 | 1 |
| <i>Hemispingus_calophrys</i>         | 1 | 1 | 1 | 1 |
| <i>Hemispingus_frontalis</i>         | 1 | 1 | 1 | 1 |
| <i>Hemispingus_melanotis</i>         | 1 | 1 | 1 | 1 |
| <i>Hemispingus_parodii</i>           | 1 | 1 | 1 | 1 |
| <i>Hemispingus_piurae</i>            | 1 | 1 | 1 | 1 |
| <i>Hemispingus_rufosuperciliaris</i> | 1 | 1 | 1 | 1 |
| <i>Hemispingus_superciliaris</i>     | 1 | 1 | 1 | 1 |
| <i>Hemispingus_trifasciatus</i>      | 1 | 1 | 1 | 1 |
| <i>Hemispingus_verticalis</i>        | 1 | 1 | 1 | 1 |

|                                        |   |   |   |   |
|----------------------------------------|---|---|---|---|
| <i>Hemispingus_xanthophthalmus</i>     | 1 | 1 | 1 | 1 |
| <i>Hemitesia_neumanni</i>              | 1 | 1 | 1 | 1 |
| <i>Hemithraupis_flavicollis</i>        | 1 | 1 | 1 | 1 |
| <i>Hemitriccus_diops</i>               | 1 | 1 | 1 | 1 |
| <i>Hemitriccus_flammulatus</i>         | 1 | 1 | 1 | 1 |
| <i>Hemitriccus_griseipectus</i>        | 1 | 1 | 1 | 1 |
| <i>Hemitriccus_iohannis</i>            | 1 | 1 | 1 | 1 |
| <i>Hemitriccus_josephinae</i>          | 1 | 1 | 1 | 1 |
| <i>Hemitriccus_margaritaceiventris</i> | 1 | 1 | 1 | 1 |
| <i>Hemitriccus_minimus</i>             | 1 | 1 | 1 | 1 |
| <i>Hemitriccus_minor</i>               | 1 | 1 | 1 | 1 |
| <i>Hemitriccus_nidipendulus</i>        | 1 | 1 | 1 | 1 |
| <i>Hemitriccus_striaticollis</i>       | 1 | 1 | 1 | 1 |
| <i>Hemitriccus_zosterops</i>           | 1 | 1 | 1 | 1 |
| <i>Hemixos_castanonotus</i>            | 1 | 1 | 1 | 1 |
| <i>Hemixos_flavala</i>                 | 1 | 1 | 1 | 1 |
| <i>Henicopernis_longicauda</i>         | 1 | 1 | 1 | 1 |
| <i>Henicophaps_albifrons</i>           | 1 | 1 | 1 | 1 |
| <i>Henicorhina_leucophrys</i>          | 1 | 1 | 1 | 1 |
| <i>Henicorhina_leucoptera</i>          | 1 | 1 | 1 | 1 |
| <i>Henicorhina_leucosticta</i>         | 1 | 1 | 1 | 1 |
| <i>Herpetotheres_cachinnans</i>        | 1 | 1 | 1 | 1 |
| <i>Herpsilochmus_atricapillus</i>      | 1 | 1 | 1 | 1 |
| <i>Herpsilochmus_axillaris</i>         | 1 | 1 | 1 | 1 |
| <i>Herpsilochmus_dorsimaculatus</i>    | 1 | 1 | 1 | 1 |
| <i>Herpsilochmus_longirostris</i>      | 1 | 1 | 1 | 1 |
| <i>Herpsilochmus_motacilloides</i>     | 1 | 1 | 1 | 1 |
| <i>Herpsilochmus_parkeri</i>           | 1 | 1 | 1 | 1 |
| <i>Herpsilochmus_rufimarginatus</i>    | 1 | 1 | 1 | 1 |
| <i>Herpsilochmus_stictocephalus</i>    | 1 | 1 | 1 | 1 |
| <i>Hesperiphona_vespertina</i>         | 1 | 1 | 1 | 1 |
| <i>Heterocercus_flavivertex</i>        | 1 | 1 | 1 | 1 |
| <i>Heterocercus_linteatus</i>          | 1 | 1 | 1 | 1 |
| <i>Heteromunia_pectoralis</i>          | 1 | 1 | 1 | 1 |
| <i>Heteronetta_atricapilla</i>         | 1 | 1 | 1 | 1 |
| <i>Heterophasia_annectans</i>          | 1 | 1 | 1 | 1 |
| <i>Heterophasia_auricularis</i>        | 1 | 1 | 1 | 1 |
| <i>Heterophasia_capistrata</i>         | 1 | 1 | 1 | 1 |
| <i>Heterophasia_gracilis</i>           | 1 | 1 | 1 | 1 |
| <i>Heterophasia_melanoleuca</i>        | 1 | 1 | 1 | 1 |
| <i>Heterophasia_picaoides</i>          | 1 | 1 | 1 | 1 |
| <i>Heterophasia_pulchella</i>          | 1 | 1 | 1 | 1 |
| <i>Heterospingus_rubrifrons</i>        | 1 | 1 | 1 | 1 |
| <i>Heterospingus_xanthopygius</i>      | 1 | 1 | 1 | 1 |

|                                  |   |   |   |   |
|----------------------------------|---|---|---|---|
| <i>Hieraaetus_ayresii</i>        | 1 | 1 | 1 | 1 |
| <i>Hieraaetus_fasciatus</i>      | 1 | 1 | 1 | 1 |
| <i>Hieraaetus_kienerii</i>       | 1 | 1 | 1 | 1 |
| <i>Hieraaetus_morphnoides</i>    | 1 | 1 | 1 | 1 |
| <i>Hieraaetus_pennatus</i>       | 1 | 1 | 1 | 1 |
| <i>Hieraaetus_spilogaster</i>    | 1 | 1 | 1 | 1 |
| <i>Hieraaetus_wahlbergi</i>      | 1 | 1 | 1 | 1 |
| <i>Hierococcyx_sparverioides</i> | 1 | 1 | 1 | 1 |
| <i>Himantopus_himantopus</i>     | 1 | 1 | 1 | 1 |
| <i>Himantopus_mexicanus</i>      | 1 | 1 | 1 | 1 |
| <i>Himantopus_novaezelandiae</i> | 1 | 1 | 1 | 1 |
| <i>Himantornis_haematopus</i>    | 1 | 1 | 1 | 1 |
| <i>Himatione_sanguinea</i>       | 1 | 1 | 1 | 1 |
| <i>Hippolais_caligata</i>        | 1 | 1 | 1 | 1 |
| <i>Hippolais_icterina</i>        | 1 | 1 | 1 | 1 |
| <i>Hippolais_languida</i>        | 1 | 1 | 1 | 1 |
| <i>Hippolais_olivetorum</i>      | 1 | 1 | 1 | 1 |
| <i>Hippolais_opaca</i>           | 1 | 1 | 1 | 1 |
| <i>Hippolais_pallida</i>         | 1 | 1 | 1 | 1 |
| <i>Hippolais_polyglotta</i>      | 1 | 1 | 1 | 1 |
| <i>Hirundapus_caudacutus</i>     | 1 | 1 | 1 | 1 |
| <i>Hirundinea_ferruginea</i>     | 1 | 1 | 1 | 1 |
| <i>Hirundo_aethiopica</i>        | 1 | 1 | 1 | 1 |
| <i>Hirundo_albigularis</i>       | 1 | 1 | 1 | 1 |
| <i>Hirundo_angolensis</i>        | 1 | 1 | 1 | 1 |
| <i>Hirundo_atrocaerulea</i>      | 1 | 1 | 1 | 1 |
| <i>Hirundo_dimidiata</i>         | 1 | 1 | 1 | 1 |
| <i>Hirundo_leucosoma</i>         | 1 | 1 | 1 | 1 |
| <i>Hirundo_lucida</i>            | 1 | 1 | 1 | 1 |
| <i>Hirundo_megaensis</i>         | 1 | 1 | 1 | 1 |
| <i>Hirundo_neoxena</i>           | 1 | 1 | 1 | 1 |
| <i>Hirundo_nigricans</i>         | 1 | 1 | 1 | 1 |
| <i>Hirundo_nigrita</i>           | 1 | 1 | 1 | 1 |
| <i>Hirundo_nigrorufa</i>         | 1 | 1 | 1 | 1 |
| <i>Hirundo_preussi</i>           | 1 | 1 | 1 | 1 |
| <i>Hirundo_rustica</i>           | 1 | 1 | 1 | 1 |
| <i>Hirundo_smithii</i>           | 1 | 1 | 1 | 1 |
| <i>Hirundo_spilodera</i>         | 1 | 1 | 1 | 1 |
| <i>Hirundo_tahitica</i>          | 1 | 1 | 1 | 1 |
| <i>Histrionicus_histrionicus</i> | 1 | 1 | 1 | 1 |
| <i>Hodgsonius_phoenicuroides</i> | 1 | 1 | 1 | 1 |
| <i>Horizorhinus_dohrni</i>       | 1 | 1 | 1 | 1 |
| <i>Hydrobates_pelagicus</i>      | 1 | 1 | 1 | 1 |
| <i>Hydrochous_gigas</i>          | 1 | 1 | 1 | 1 |

|                                    |   |   |   |   |
|------------------------------------|---|---|---|---|
| <i>Hydrocoloeus minutus</i>        | 1 | 1 | 1 | 1 |
| <i>Hydrophasianus chirurgus</i>    | 1 | 1 | 1 | 1 |
| <i>Hydroprogne caspia</i>          | 1 | 1 | 1 | 1 |
| <i>Hydropsalis climacocerca</i>    | 1 | 1 | 1 | 1 |
| <i>Hydropsalis torquata</i>        | 1 | 1 | 1 | 1 |
| <i>Hydrornis baudii</i>            | 1 | 1 | 1 | 1 |
| <i>Hydrornis caerulea</i>          | 1 | 1 | 1 | 1 |
| <i>Hydrornis cyanea</i>            | 1 | 1 | 1 | 1 |
| <i>Hydrornis elliotii</i>          | 1 | 1 | 1 | 1 |
| <i>Hydrornis guajana</i>           | 1 | 1 | 1 | 1 |
| <i>Hydrornis gurneyi</i>           | 1 | 1 | 1 | 1 |
| <i>Hydrornis nipalensis</i>        | 1 | 1 | 1 | 1 |
| <i>Hydrornis oatesi</i>            | 1 | 1 | 1 | 1 |
| <i>Hydrornis phayrei</i>           | 1 | 1 | 1 | 1 |
| <i>Hydrornis soror</i>             | 1 | 1 | 1 | 1 |
| <i>Hylexetastes perrotii</i>       | 1 | 1 | 1 | 1 |
| <i>Hylia prasina</i>               | 1 | 1 | 1 | 1 |
| <i>Hyliota flavigaster</i>         | 1 | 1 | 1 | 1 |
| <i>Hylocharis chrysura</i>         | 1 | 1 | 1 | 1 |
| <i>Hylocharis cyanus</i>           | 1 | 1 | 1 | 1 |
| <i>Hylocharis eliciae</i>          | 1 | 1 | 1 | 1 |
| <i>Hylocharis grayi</i>            | 1 | 1 | 1 | 1 |
| <i>Hylocharis leucotis</i>         | 1 | 1 | 1 | 1 |
| <i>Hylocharis sapphirina</i>       | 1 | 1 | 1 | 1 |
| <i>Hylocharis xantusii</i>         | 1 | 1 | 1 | 1 |
| <i>Hylocichla mustelina</i>        | 1 | 1 | 1 | 1 |
| <i>Hylocitrea bonensis</i>         | 1 | 1 | 1 | 1 |
| <i>Hylocryptus erythrocephalus</i> | 1 | 1 | 1 | 1 |
| <i>Hyloctistes subulatus</i>       | 1 | 1 | 1 | 1 |
| <i>Hylomanes momotula</i>          | 1 | 1 | 1 | 1 |
| <i>Hylopezus berlepschi</i>        | 1 | 1 | 1 | 1 |
| <i>Hylopezus fulviventris</i>      | 1 | 1 | 1 | 1 |
| <i>Hylopezus ochroleucus</i>       | 1 | 1 | 1 | 1 |
| <i>Hylophilus decurtatus</i>       | 1 | 1 | 1 | 1 |
| <i>Hylophilus ochraceiceps</i>     | 1 | 1 | 1 | 1 |
| <i>Hylophylax naevioides</i>       | 1 | 1 | 1 | 1 |
| <i>Hylophylax naevius</i>          | 1 | 1 | 1 | 1 |
| <i>Hylophylax punctulatus</i>      | 1 | 1 | 1 | 1 |
| <i>Hymenolaimus malacorhynchos</i> | 1 | 1 | 1 | 1 |
| <i>Hymenops perspicillatus</i>     | 1 | 1 | 1 | 1 |
| <i>Hypargos margaritatus</i>       | 1 | 1 | 1 | 1 |
| <i>Hypargos niveoguttatus</i>      | 1 | 1 | 1 | 1 |
| <i>Hypergerus atriceps</i>         | 1 | 1 | 1 | 1 |
| <i>Hypocnemis cantator</i>         | 1 | 1 | 1 | 1 |

|                                    |   |   |   |   |
|------------------------------------|---|---|---|---|
| <i>Hypocnemis_hypoxantha</i>       | 1 | 1 | 1 | 1 |
| <i>Hypocnemoides_maculicauda</i>   | 1 | 1 | 1 | 1 |
| <i>Hypocolius_ampelinus</i>        | 1 | 1 | 1 | 1 |
| <i>Hypocryptadius_cinnamomeus</i>  | 1 | 1 | 1 | 1 |
| <i>Hypoedaleus_guttatus</i>        | 1 | 1 | 1 | 1 |
| <i>Hypogramma_hypogrammicum</i>    | 1 | 1 | 1 | 1 |
| <i>Hypopyrrhus_pyrohypogaster</i>  | 1 | 1 | 1 | 1 |
| <i>Hypositta_corallirostris</i>    | 1 | 1 | 1 | 1 |
| <i>Hypothymis_azurea</i>           | 1 | 1 | 1 | 1 |
| <i>Hypothymis_helenae</i>          | 1 | 1 | 1 | 1 |
| <i>Hypsipetes_borbonicus</i>       | 1 | 1 | 1 | 1 |
| <i>Hypsipetes_crassirostris</i>    | 1 | 1 | 1 | 1 |
| <i>Hypsipetes_leucocephalus</i>    | 1 | 1 | 1 | 1 |
| <i>Hypsipetes_madagascariensis</i> | 1 | 1 | 1 | 1 |
| <i>Hypsipetes_mcclellandii</i>     | 1 | 1 | 1 | 1 |
| <i>Hypsipetes_olivaceus</i>        | 1 | 1 | 1 | 1 |
| <i>Hypsipetes_parvirostris</i>     | 1 | 1 | 1 | 1 |
| <i>Ibidorhyncha_struthersii</i>    | 1 | 1 | 1 | 1 |
| <i>Ichthyaetus_audouinii</i>       | 1 | 1 | 1 | 1 |
| <i>Ichthyaetus_hemprichii</i>      | 1 | 1 | 1 | 1 |
| <i>Ichthyaetus_ichthyaetus</i>     | 1 | 1 | 1 | 1 |
| <i>Ichthyaetus_leucophthalmus</i>  | 1 | 1 | 1 | 1 |
| <i>Ichthyaetus_melanocephalus</i>  | 1 | 1 | 1 | 1 |
| <i>Ichthyaetus_relictus</i>        | 1 | 1 | 1 | 1 |
| <i>Ichthyophaga_humilis</i>        | 1 | 1 | 1 | 1 |
| <i>Ichthyophaga_ichthyaetus</i>    | 1 | 1 | 1 | 1 |
| <i>Icteria_virens</i>              | 1 | 1 | 1 | 1 |
| <i>Icterus_abeillei</i>            | 1 | 1 | 1 | 1 |
| <i>Icterus_auratus</i>             | 1 | 1 | 1 | 1 |
| <i>Icterus_auricapillus</i>        | 1 | 1 | 1 | 1 |
| <i>Icterus_bonana</i>              | 1 | 1 | 1 | 1 |
| <i>Icterus_bullockii</i>           | 1 | 1 | 1 | 1 |
| <i>Icterus_cayanensis</i>          | 1 | 1 | 1 | 1 |
| <i>Icterus_chrysater</i>           | 1 | 1 | 1 | 1 |
| <i>Icterus_cucullatus</i>          | 1 | 1 | 1 | 1 |
| <i>Icterus_dominicensis</i>        | 1 | 1 | 1 | 1 |
| <i>Icterus_galbula</i>             | 1 | 1 | 1 | 1 |
| <i>Icterus_graceannae</i>          | 1 | 1 | 1 | 1 |
| <i>Icterus_graduacauda</i>         | 1 | 1 | 1 | 1 |
| <i>Icterus_gularis</i>             | 1 | 1 | 1 | 1 |
| <i>Icterus_icterus</i>             | 1 | 1 | 1 | 1 |
| <i>Icterus_jamacaii</i>            | 1 | 1 | 1 | 1 |
| <i>Icterus_laudabilis</i>          | 1 | 1 | 1 | 1 |
| <i>Icterus_leucopteryx</i>         | 1 | 1 | 1 | 1 |

|                                     |   |   |   |   |
|-------------------------------------|---|---|---|---|
| <i>Icterus_maculialatus</i>         | 1 | 1 | 1 | 1 |
| <i>Icterus_mesomelas</i>            | 1 | 1 | 1 | 1 |
| <i>Icterus_nigrogularis</i>         | 1 | 1 | 1 | 1 |
| <i>Icterus_oberi</i>                | 1 | 1 | 1 | 1 |
| <i>Icterus_parisorum</i>            | 1 | 1 | 1 | 1 |
| <i>Icterus_pectoralis</i>           | 1 | 1 | 1 | 1 |
| <i>Icterus_prosthemelas</i>         | 1 | 1 | 1 | 1 |
| <i>Icterus_pustulatus</i>           | 1 | 1 | 1 | 1 |
| <i>Icterus_spurius</i>              | 1 | 1 | 1 | 1 |
| <i>Icterus_wagleri</i>              | 1 | 1 | 1 | 1 |
| <i>Ictinaetus_malayensis</i>        | 1 | 1 | 1 | 1 |
| <i>Ictinia_mississippiensis</i>     | 1 | 1 | 1 | 1 |
| <i>Ictinia_plumbea</i>              | 1 | 1 | 1 | 1 |
| <i>Idiopsar_brachyurus</i>          | 1 | 1 | 1 | 1 |
| <i>Iduna_rama</i>                   | 1 | 1 | 1 | 1 |
| <i>Ifrita_kowaldi</i>               | 1 | 1 | 1 | 1 |
| <i>Ilicura_militaris</i>            | 1 | 1 | 1 | 1 |
| <i>Illadopsis_albipectus</i>        | 1 | 1 | 1 | 1 |
| <i>Illadopsis_cleaveri</i>          | 1 | 1 | 1 | 1 |
| <i>Illadopsis_fulvescens</i>        | 1 | 1 | 1 | 1 |
| <i>Illadopsis_puveli</i>            | 1 | 1 | 1 | 1 |
| <i>Illadopsis_pyrrhopterum</i>      | 1 | 1 | 1 | 1 |
| <i>Illadopsis_rufescens</i>         | 1 | 1 | 1 | 1 |
| <i>Illadopsis_rufipennis</i>        | 1 | 1 | 1 | 1 |
| <i>Incana_incana</i>                | 1 | 1 | 1 | 1 |
| <i>Indicator_exilis</i>             | 1 | 1 | 1 | 1 |
| <i>Indicator_maculatus</i>          | 1 | 1 | 1 | 1 |
| <i>Indicator_minor</i>              | 1 | 1 | 1 | 1 |
| <i>Indicator_variegatus</i>         | 1 | 1 | 1 | 1 |
| <i>Inezia_caudata</i>               | 1 | 1 | 1 | 1 |
| <i>Inezia_inornata</i>              | 1 | 1 | 1 | 1 |
| <i>Inezia_subflava</i>              | 1 | 1 | 1 | 1 |
| <i>Iodopleura_fusca</i>             | 1 | 1 | 1 | 1 |
| <i>Iodopleura_isabellae</i>         | 1 | 1 | 1 | 1 |
| <i>Iole_olivacea</i>                | 1 | 1 | 1 | 1 |
| <i>Iole_palawanensis</i>            | 1 | 1 | 1 | 1 |
| <i>Iole_propinqua</i>               | 1 | 1 | 1 | 1 |
| <i>Irania_gutturalis</i>            | 1 | 1 | 1 | 1 |
| <i>Irediparra_gallinacea</i>        | 1 | 1 | 1 | 1 |
| <i>Irena_cyanogastra</i>            | 1 | 1 | 1 | 1 |
| <i>Irena_puella</i>                 | 1 | 1 | 1 | 1 |
| <i>Iridosornis_analis</i>           | 1 | 1 | 1 | 1 |
| <i>Iridosornis_jelskii</i>          | 1 | 1 | 1 | 1 |
| <i>Iridosornis_porphyrocephalus</i> | 1 | 1 | 1 | 1 |



|                                 |   |   |   |   |
|---------------------------------|---|---|---|---|
| <i>Iridosornis_reinhardti</i>   | 1 | 1 | 1 | 1 |
| <i>Iridosornis_rufivertex</i>   | 1 | 1 | 1 | 1 |
| <i>Ithaginis_cruentus</i>       | 1 | 1 | 1 | 1 |
| <i>Ixobrychus_cinnamomeus</i>   | 1 | 1 | 1 | 1 |
| <i>Ixobrychus_eurhythmus</i>    | 1 | 1 | 1 | 1 |
| <i>Ixobrychus_exilis</i>        | 1 | 1 | 1 | 1 |
| <i>Ixobrychus_flavicollis</i>   | 1 | 1 | 1 | 1 |
| <i>Ixobrychus_involucris</i>    | 1 | 1 | 1 | 1 |
| <i>Ixobrychus_minutus</i>       | 1 | 1 | 1 | 1 |
| <i>Ixobrychus_sinensis</i>      | 1 | 1 | 1 | 1 |
| <i>Ixonotus_guttatus</i>        | 1 | 1 | 1 | 1 |
| <i>Ixoreus_naevius</i>          | 1 | 1 | 1 | 1 |
| <i>Ixos_everetti</i>            | 1 | 1 | 1 | 1 |
| <i>Ixos_malaccensis</i>         | 1 | 1 | 1 | 1 |
| <i>Ixos_philippinus</i>         | 1 | 1 | 1 | 1 |
| <i>Ixos_rufigularis</i>         | 1 | 1 | 1 | 1 |
| <i>Ixos_siquijorensis</i>       | 1 | 1 | 1 | 1 |
| <i>Jabiru_mycteria</i>          | 1 | 1 | 1 | 1 |
| <i>Jabouilleia_danjoui</i>      | 1 | 1 | 1 | 1 |
| <i>Jacana_jacana</i>            | 1 | 1 | 1 | 1 |
| <i>Jacana_spinosa</i>           | 1 | 1 | 1 | 1 |
| <i>Junco_hyemalis</i>           | 1 | 1 | 1 | 1 |
| <i>Junco_phaeonotus</i>         | 1 | 1 | 1 | 1 |
| <i>Jynx_torquilla</i>           | 1 | 1 | 1 | 1 |
| <i>Kakamega_poliiothorax</i>    | 1 | 1 | 1 | 1 |
| <i>Kaupifalco_monogrammicus</i> | 1 | 1 | 1 | 1 |
| <i>Kenopia_striata</i>          | 1 | 1 | 1 | 1 |
| <i>Ketupa_ketupa</i>            | 1 | 1 | 1 | 1 |
| <i>Ketupa_zeylonensis</i>       | 1 | 1 | 1 | 1 |
| <i>Klais_guimeti</i>            | 1 | 1 | 1 | 1 |
| <i>Knipolegus_aterrimus</i>     | 1 | 1 | 1 | 1 |
| <i>Knipolegus_cyanirostris</i>  | 1 | 1 | 1 | 1 |
| <i>Knipolegus_franciscanus</i>  | 1 | 1 | 1 | 1 |
| <i>Knipolegus_hudsoni</i>       | 1 | 1 | 1 | 1 |
| <i>Knipolegus_lophotes</i>      | 1 | 1 | 1 | 1 |
| <i>Knipolegus_nigerrimus</i>    | 1 | 1 | 1 | 1 |
| <i>Knipolegus_poecilurus</i>    | 1 | 1 | 1 | 1 |
| <i>Knipolegus_signatus</i>      | 1 | 1 | 1 | 1 |
| <i>Knipolegus_striaticeps</i>   | 1 | 1 | 1 | 1 |
| <i>Kupeornis_chapini</i>        | 1 | 1 | 1 | 1 |
| <i>Lacedo_pulchella</i>         | 1 | 1 | 1 | 1 |
| <i>Lafresnaya_lafresnayi</i>    | 1 | 1 | 1 | 1 |
| <i>Lagonosticta_larvata</i>     | 1 | 1 | 1 | 1 |
| <i>Lagonosticta_nitidula</i>    | 1 | 1 | 1 | 1 |

|                                      |   |   |   |   |
|--------------------------------------|---|---|---|---|
| <i>Lagonosticta_rara</i>             | 1 | 1 | 1 | 1 |
| <i>Lagonosticta_rhodopareia</i>      | 1 | 1 | 1 | 1 |
| <i>Lagonosticta_rubicata</i>         | 1 | 1 | 1 | 1 |
| <i>Lagonosticta_rufopicta</i>        | 1 | 1 | 1 | 1 |
| <i>Lagonosticta_sanguinodorsalis</i> | 1 | 1 | 1 | 1 |
| <i>Lagonosticta_senegala</i>         | 1 | 1 | 1 | 1 |
| <i>Lagonosticta_umbrinodorsalis</i>  | 1 | 1 | 1 | 1 |
| <i>Lagonosticta_virata</i>           | 1 | 1 | 1 | 1 |
| <i>Lagopus_lagopus</i>               | 1 | 1 | 1 | 1 |
| <i>Lagopus_leucura</i>               | 1 | 1 | 1 | 1 |
| <i>Lagopus_muta</i>                  | 1 | 1 | 1 | 1 |
| <i>Lalage_atrovirens</i>             | 1 | 1 | 1 | 1 |
| <i>Lalage_leucomela</i>              | 1 | 1 | 1 | 1 |
| <i>Lalage_leucopyga</i>              | 1 | 1 | 1 | 1 |
| <i>Lalage_leucopygialis</i>          | 1 | 1 | 1 | 1 |
| <i>Lalage_maculosa</i>               | 1 | 1 | 1 | 1 |
| <i>Lalage_melanoleuca</i>            | 1 | 1 | 1 | 1 |
| <i>Lalage_nigra</i>                  | 1 | 1 | 1 | 1 |
| <i>Lalage_sharpei</i>                | 1 | 1 | 1 | 1 |
| <i>Lalage_sueurii</i>                | 1 | 1 | 1 | 1 |
| <i>Lalage_tricolor</i>               | 1 | 1 | 1 | 1 |
| <i>Lampornis_amethystinus</i>        | 1 | 1 | 1 | 1 |
| <i>Lampornis_calolaemus</i>          | 1 | 1 | 1 | 1 |
| <i>Lampornis_castaneiventris</i>     | 1 | 1 | 1 | 1 |
| <i>Lampornis_clemenciae</i>          | 1 | 1 | 1 | 1 |
| <i>Lampornis_hemileucus</i>          | 1 | 1 | 1 | 1 |
| <i>Lampornis_sybillae</i>            | 1 | 1 | 1 | 1 |
| <i>Lampornis_viridipallens</i>       | 1 | 1 | 1 | 1 |
| <i>Lamprolaima_rhami</i>             | 1 | 1 | 1 | 1 |
| <i>Lamprolia_victoriae</i>           | 1 | 1 | 1 | 1 |
| <i>Lamprosar_tanagrinus</i>          | 1 | 1 | 1 | 1 |
| <i>Lamprospiza_melanoleuca</i>       | 1 | 1 | 1 | 1 |
| <i>Lamprotornis_acuticaudus</i>      | 1 | 1 | 1 | 1 |
| <i>Lamprotornis_australis</i>        | 1 | 1 | 1 | 1 |
| <i>Lamprotornis_caudatus</i>         | 1 | 1 | 1 | 1 |
| <i>Lamprotornis_chalcurus</i>        | 1 | 1 | 1 | 1 |
| <i>Lamprotornis_chalybaeus</i>       | 1 | 1 | 1 | 1 |
| <i>Lamprotornis_chloropterus</i>     | 1 | 1 | 1 | 1 |
| <i>Lamprotornis_corruscus</i>        | 1 | 1 | 1 | 1 |
| <i>Lamprotornis_cupreocauda</i>      | 1 | 1 | 1 | 1 |
| <i>Lamprotornis_hildebrandti</i>     | 1 | 1 | 1 | 1 |
| <i>Lamprotornis_iris</i>             | 1 | 1 | 1 | 1 |
| <i>Lamprotornis_mevesii</i>          | 1 | 1 | 1 | 1 |
| <i>Lamprotornis_nitens</i>           | 1 | 1 | 1 | 1 |

|                                  |   |   |   |   |
|----------------------------------|---|---|---|---|
| <i>Lamprotornis_ornatus</i>      | 1 | 1 | 1 | 1 |
| <i>Lamprotornis_pulcher</i>      | 1 | 1 | 1 | 1 |
| <i>Lamprotornis_purpureiceps</i> | 1 | 1 | 1 | 1 |
| <i>Lamprotornis_purpureus</i>    | 1 | 1 | 1 | 1 |
| <i>Lamprotornis_purpuroptera</i> | 1 | 1 | 1 | 1 |
| <i>Lamprotornis_shelleyi</i>     | 1 | 1 | 1 | 1 |
| <i>Lamprotornis_splendidus</i>   | 1 | 1 | 1 | 1 |
| <i>Lamprotornis_superbus</i>     | 1 | 1 | 1 | 1 |
| <i>Lamprotornis_unicolor</i>     | 1 | 1 | 1 | 1 |
| <i>Laniarius_aethiopicus</i>     | 1 | 1 | 1 | 1 |
| <i>Laniarius_atrococcineus</i>   | 1 | 1 | 1 | 1 |
| <i>Laniarius_atroflavus</i>      | 1 | 1 | 1 | 1 |
| <i>Laniarius_barbarus</i>        | 1 | 1 | 1 | 1 |
| <i>Laniarius_bicolor</i>         | 1 | 1 | 1 | 1 |
| <i>Laniarius_erythrogaster</i>   | 1 | 1 | 1 | 1 |
| <i>Laniarius_ferrugineus</i>     | 1 | 1 | 1 | 1 |
| <i>Laniarius_fuelleborni</i>     | 1 | 1 | 1 | 1 |
| <i>Laniarius_funebris</i>        | 1 | 1 | 1 | 1 |
| <i>Laniarius_leucorhynchus</i>   | 1 | 1 | 1 | 1 |
| <i>Laniarius_luehderi</i>        | 1 | 1 | 1 | 1 |
| <i>Laniarius_mufumbiri</i>       | 1 | 1 | 1 | 1 |
| <i>Laniarius_poensis</i>         | 1 | 1 | 1 | 1 |
| <i>Laniarius_ruficeps</i>        | 1 | 1 | 1 | 1 |
| <i>Laniarius_turatii</i>         | 1 | 1 | 1 | 1 |
| <i>Laniisoma_elegans</i>         | 1 | 1 | 1 | 1 |
| <i>Lanio_aurantius</i>           | 1 | 1 | 1 | 1 |
| <i>Lanio_fulvus</i>              | 1 | 1 | 1 | 1 |
| <i>Lanio_leucothorax</i>         | 1 | 1 | 1 | 1 |
| <i>Lanio_versicolor</i>          | 1 | 1 | 1 | 1 |
| <i>Laniocera_hypopyrra</i>       | 1 | 1 | 1 | 1 |
| <i>Lanioturdus_torquatus</i>     | 1 | 1 | 1 | 1 |
| <i>Lanius_bucephalus</i>         | 1 | 1 | 1 | 1 |
| <i>Lanius_cabanisi</i>           | 1 | 1 | 1 | 1 |
| <i>Lanius_collaris</i>           | 1 | 1 | 1 | 1 |
| <i>Lanius_collurio</i>           | 1 | 1 | 1 | 1 |
| <i>Lanius_cristatus</i>          | 1 | 1 | 1 | 1 |
| <i>Lanius_dorsalis</i>           | 1 | 1 | 1 | 1 |
| <i>Lanius_excubitor</i>          | 1 | 1 | 1 | 1 |
| <i>Lanius_excubitoroides</i>     | 1 | 1 | 1 | 1 |
| <i>Lanius_isabellinus</i>        | 1 | 1 | 1 | 1 |
| <i>Lanius_ludovicianus</i>       | 1 | 1 | 1 | 1 |
| <i>Lanius_mackinnoni</i>         | 1 | 1 | 1 | 1 |
| <i>Lanius_marwitzi</i>           | 1 | 1 | 1 | 1 |
| <i>Lanius_meridionalis</i>       | 1 | 1 | 1 | 1 |

|                               |   |   |   |   |
|-------------------------------|---|---|---|---|
| <i>Lanius_minor</i>           | 1 | 1 | 1 | 1 |
| <i>Lanius_nubicus</i>         | 1 | 1 | 1 | 1 |
| <i>Lanius_schach</i>          | 1 | 1 | 1 | 1 |
| <i>Lanius_senator</i>         | 1 | 1 | 1 | 1 |
| <i>Lanius_somalicus</i>       | 1 | 1 | 1 | 1 |
| <i>Lanius_sphenocercus</i>    | 1 | 1 | 1 | 1 |
| <i>Lanius_tephronotus</i>     | 1 | 1 | 1 | 1 |
| <i>Lanius_tigrinus</i>        | 1 | 1 | 1 | 1 |
| <i>Lanius_vittatus</i>        | 1 | 1 | 1 | 1 |
| <i>Larosterna_inca</i>        | 1 | 1 | 1 | 1 |
| <i>Larus_argentatus</i>       | 1 | 1 | 1 | 1 |
| <i>Larus_armenicus</i>        | 1 | 1 | 1 | 1 |
| <i>Larus_atlanticus</i>       | 1 | 1 | 1 | 1 |
| <i>Larus_atricilla</i>        | 1 | 1 | 1 | 1 |
| <i>Larus_belcheri</i>         | 1 | 1 | 1 | 1 |
| <i>Larus_brunnicephalus</i>   | 1 | 1 | 1 | 1 |
| <i>Larus_bulleri</i>          | 1 | 1 | 1 | 1 |
| <i>Larus_cachinnans</i>       | 1 | 1 | 1 | 1 |
| <i>Larus_californicus</i>     | 1 | 1 | 1 | 1 |
| <i>Larus_canus</i>            | 1 | 1 | 1 | 1 |
| <i>Larus_crassirostris</i>    | 1 | 1 | 1 | 1 |
| <i>Larus_delawarensis</i>     | 1 | 1 | 1 | 1 |
| <i>Larus_dominicanus</i>      | 1 | 1 | 1 | 1 |
| <i>Larus_fuliginosus</i>      | 1 | 1 | 1 | 1 |
| <i>Larus_fuscus</i>           | 1 | 1 | 1 | 1 |
| <i>Larus_genei</i>            | 1 | 1 | 1 | 1 |
| <i>Larus_glaucescens</i>      | 1 | 1 | 1 | 1 |
| <i>Larus_glaucoides</i>       | 1 | 1 | 1 | 1 |
| <i>Larus_hartlaubii</i>       | 1 | 1 | 1 | 1 |
| <i>Larus_heermanni</i>        | 1 | 1 | 1 | 1 |
| <i>Larus_hyperboreus</i>      | 1 | 1 | 1 | 1 |
| <i>Larus_livens</i>           | 1 | 1 | 1 | 1 |
| <i>Larus_maculipennis</i>     | 1 | 1 | 1 | 1 |
| <i>Larus_marinus</i>          | 1 | 1 | 1 | 1 |
| <i>Larus_michahellis</i>      | 1 | 1 | 1 | 1 |
| <i>Larus_modestus</i>         | 1 | 1 | 1 | 1 |
| <i>Larus_novaehollandiae</i>  | 1 | 1 | 1 | 1 |
| <i>Larus_occidentalis</i>     | 1 | 1 | 1 | 1 |
| <i>Larus_pacificus</i>        | 1 | 1 | 1 | 1 |
| <i>Larus_philadelphia</i>     | 1 | 1 | 1 | 1 |
| <i>Larus_schistisagus</i>     | 1 | 1 | 1 | 1 |
| <i>Larus_serranus</i>         | 1 | 1 | 1 | 1 |
| <i>Larus_thayeri</i>          | 1 | 1 | 1 | 1 |
| <i>Laterallus_albigularis</i> | 1 | 1 | 1 | 1 |

|                                      |   |   |   |   |
|--------------------------------------|---|---|---|---|
| <i>Laterallus_jamaicensis</i>        | 1 | 1 | 1 | 1 |
| <i>Laterallus_melanophaius</i>       | 1 | 1 | 1 | 1 |
| <i>Lathamus_discolor</i>             | 1 | 1 | 1 | 1 |
| <i>Lathrotriccus_euleri</i>          | 1 | 1 | 1 | 1 |
| <i>Latoucheornis_siemsseni</i>       | 1 | 1 | 1 | 1 |
| <i>Legatus_leucophaius</i>           | 1 | 1 | 1 | 1 |
| <i>Leiothrix_argentauris</i>         | 1 | 1 | 1 | 1 |
| <i>Leiothrix_lutea</i>               | 1 | 1 | 1 | 1 |
| <i>Leipoa_ocellata</i>               | 1 | 1 | 0 | 1 |
| <i>Lemuresthes_nana</i>              | 1 | 1 | 1 | 1 |
| <i>Lepidocolaptes_affinis</i>        | 1 | 1 | 1 | 1 |
| <i>Lepidocolaptes_albolineatus</i>   | 1 | 1 | 1 | 1 |
| <i>Lepidocolaptes_angustirostris</i> | 1 | 1 | 1 | 1 |
| <i>Lepidocolaptes_falcinellus</i>    | 1 | 1 | 1 | 1 |
| <i>Lepidocolaptes_lacrymiger</i>     | 1 | 1 | 1 | 1 |
| <i>Lepidocolaptes_leucogaster</i>    | 1 | 1 | 1 | 1 |
| <i>Lepidocolaptes_souleyetii</i>     | 1 | 1 | 1 | 1 |
| <i>Lepidocolaptes_squamatus</i>      | 1 | 1 | 1 | 1 |
| <i>Lepidocolaptes_wagleri</i>        | 1 | 1 | 1 | 1 |
| <i>Lepidopyga_coeruleogularis</i>    | 1 | 1 | 1 | 1 |
| <i>Lepidothrix_coeruleocapilla</i>   | 1 | 1 | 1 | 1 |
| <i>Lepidothrix_coronata</i>          | 1 | 1 | 1 | 1 |
| <i>Lepidothrix_iris</i>              | 1 | 1 | 1 | 1 |
| <i>Lepidothrix_nattereri</i>         | 1 | 1 | 1 | 1 |
| <i>Lepidothrix_serena</i>            | 1 | 1 | 1 | 1 |
| <i>Lepidothrix_suavissima</i>        | 1 | 1 | 1 | 1 |
| <i>Leptasthenura_aegithaloides</i>   | 1 | 1 | 1 | 1 |
| <i>Leptasthenura_fuliginiceps</i>    | 1 | 1 | 1 | 1 |
| <i>Leptasthenura_pileata</i>         | 1 | 1 | 1 | 1 |
| <i>Leptasthenura_platensis</i>       | 1 | 1 | 1 | 1 |
| <i>Leptasthenura_yanacensis</i>      | 1 | 1 | 1 | 1 |
| <i>Leptodon_cayanensis</i>           | 1 | 1 | 1 | 1 |
| <i>Leptopoecile_elegans</i>          | 1 | 1 | 1 | 1 |
| <i>Leptopoecile_sophiae</i>          | 1 | 1 | 1 | 1 |
| <i>Leptopogon_amaurocephalus</i>     | 1 | 1 | 1 | 1 |
| <i>Leptopterus_chabert</i>           | 1 | 1 | 1 | 1 |
| <i>Leptoptilos_crumeniferus</i>      | 1 | 1 | 1 | 1 |
| <i>Leptoptilos_javanicus</i>         | 1 | 1 | 1 | 1 |
| <i>Leptosittaca_branickii</i>        | 1 | 1 | 1 | 1 |
| <i>Leptosomus_discolor</i>           | 1 | 1 | 1 | 1 |
| <i>Leptotila_cassini</i>             | 1 | 1 | 1 | 1 |
| <i>Leptotila_jamaicensis</i>         | 1 | 1 | 1 | 1 |
| <i>Leptotila_megalura</i>            | 1 | 1 | 1 | 1 |
| <i>Leptotila_plumbeiceps</i>         | 1 | 1 | 1 | 1 |

|                                   |   |   |   |   |
|-----------------------------------|---|---|---|---|
| <i>Leptotila_rufaxilla</i>        | 1 | 1 | 1 | 1 |
| <i>Leptotila_verreauxi</i>        | 1 | 1 | 1 | 1 |
| <i>Lesbia_nuna</i>                | 1 | 1 | 1 | 1 |
| <i>Lesbia_victoriae</i>           | 1 | 1 | 1 | 1 |
| <i>Lessonia_oreas</i>             | 1 | 1 | 1 | 1 |
| <i>Lessonia_rufa</i>              | 1 | 1 | 1 | 1 |
| <i>Leucippus_baeri</i>            | 1 | 1 | 1 | 1 |
| <i>Leucippus_chlorocercus</i>     | 1 | 1 | 1 | 1 |
| <i>Leucopez_a_semperi</i>         | 1 | 1 | 1 | 1 |
| <i>Leucophaeus_pipixcan</i>       | 1 | 1 | 1 | 1 |
| <i>Leucophaeus_scoresbii</i>      | 1 | 1 | 1 | 1 |
| <i>Leucopsar_rothschildi</i>      | 1 | 1 | 1 | 1 |
| <i>Leucopternis_albicollis</i>    | 1 | 1 | 1 | 1 |
| <i>Leucopternis_kuhli</i>         | 1 | 1 | 1 | 1 |
| <i>Leucopternis_lacernulatus</i>  | 1 | 1 | 1 | 1 |
| <i>Leucopternis_melanops</i>      | 1 | 1 | 1 | 1 |
| <i>Leucopternis_occidentalis</i>  | 1 | 1 | 1 | 1 |
| <i>Leucopternis_plumbeus</i>      | 1 | 1 | 1 | 1 |
| <i>Leucopternis_polionotus</i>    | 1 | 1 | 1 | 1 |
| <i>Leucopternis_princeps</i>      | 1 | 1 | 1 | 1 |
| <i>Leucopternis_schistaceus</i>   | 1 | 1 | 1 | 1 |
| <i>Leucopternis_semiplumbeus</i>  | 1 | 1 | 1 | 1 |
| <i>Leucosarcia_melanoleuca</i>    | 1 | 1 | 1 | 1 |
| <i>Leucosticte_arctoa</i>         | 1 | 1 | 1 | 1 |
| <i>Leucosticte_atrata</i>         | 1 | 1 | 1 | 1 |
| <i>Leucosticte_australis</i>      | 1 | 1 | 1 | 1 |
| <i>Leucosticte_brandti</i>        | 1 | 1 | 1 | 1 |
| <i>Leucosticte_nemoricola</i>     | 1 | 1 | 1 | 1 |
| <i>Leucosticte_tephrocotis</i>    | 1 | 1 | 1 | 1 |
| <i>Lichenostomus_flavus</i>       | 1 | 1 | 1 | 1 |
| <i>Lichenostomus_leucotis</i>     | 1 | 1 | 1 | 1 |
| <i>Lichenostomus_ornatus</i>      | 1 | 1 | 1 | 1 |
| <i>Lichenostomus_penicillatus</i> | 1 | 1 | 1 | 1 |
| <i>Lichenostomus_virescens</i>    | 1 | 1 | 1 | 1 |
| <i>Lichmera_alboauricularis</i>   | 1 | 1 | 1 | 1 |
| <i>Lichmera_indistincta</i>       | 1 | 1 | 1 | 1 |
| <i>Limicola_falcinellus</i>       | 1 | 1 | 1 | 1 |
| <i>Limnoctites_rectirostris</i>   | 1 | 1 | 1 | 1 |
| <i>Limnodromus_griseus</i>        | 1 | 1 | 1 | 1 |
| <i>Limnodromus_scolopaceus</i>    | 1 | 1 | 1 | 1 |
| <i>Limnornis_curvirostris</i>     | 1 | 1 | 1 | 1 |
| <i>Limnothlypis_swainsonii</i>    | 1 | 1 | 1 | 1 |
| <i>Limosa_fedoa</i>               | 1 | 1 | 1 | 1 |
| <i>Limosa_haemastica</i>          | 1 | 1 | 1 | 1 |

|                                  |   |   |   |   |
|----------------------------------|---|---|---|---|
| <i>Limosa_lapponica</i>          | 1 | 1 | 1 | 1 |
| <i>Limosa_limosa</i>             | 1 | 1 | 1 | 1 |
| <i>Linurgus_olivaceus</i>        | 1 | 1 | 1 | 1 |
| <i>Liocichla_omeiensis</i>       | 1 | 1 | 1 | 1 |
| <i>Liocichla_phoenicea</i>       | 1 | 1 | 1 | 1 |
| <i>Liocichla_steerii</i>         | 1 | 1 | 1 | 1 |
| <i>Lioptilus_nigricapillus</i>   | 1 | 1 | 1 | 1 |
| <i>Liosceles_thoracicus</i>      | 1 | 1 | 1 | 1 |
| <i>Lipaugus_fuscocinereus</i>    | 1 | 1 | 1 | 1 |
| <i>Lipaugus_streptophorus</i>    | 1 | 1 | 1 | 1 |
| <i>Lipaugus_unirufus</i>         | 1 | 1 | 1 | 1 |
| <i>Lipaugus_vociferans</i>       | 1 | 1 | 1 | 1 |
| <i>Lissotis_melanogaster</i>     | 1 | 1 | 1 | 1 |
| <i>Loboparadisea_sericea</i>     | 1 | 1 | 1 | 1 |
| <i>Lobotos_oriolinus</i>         | 1 | 1 | 1 | 1 |
| <i>Lochmias_nematura</i>         | 1 | 1 | 1 | 1 |
| <i>Locustella_certhiola</i>      | 1 | 1 | 1 | 1 |
| <i>Locustella_fasciolata</i>     | 1 | 1 | 1 | 1 |
| <i>Locustella_fluviatilis</i>    | 1 | 1 | 1 | 1 |
| <i>Locustella_lanceolata</i>     | 1 | 1 | 1 | 1 |
| <i>Locustella_luscinioides</i>   | 1 | 1 | 1 | 1 |
| <i>Locustella_naevia</i>         | 1 | 1 | 1 | 1 |
| <i>Locustella_ochotensis</i>     | 1 | 1 | 1 | 1 |
| <i>Locustella_pleskei</i>        | 1 | 1 | 1 | 1 |
| <i>Lonchura_bicolor</i>          | 1 | 1 | 1 | 1 |
| <i>Lonchura_cantans</i>          | 1 | 1 | 1 | 1 |
| <i>Lonchura_castaneothorax</i>   | 1 | 1 | 1 | 1 |
| <i>Lonchura_cucullata</i>        | 1 | 1 | 1 | 1 |
| <i>Lonchura_fringilloides</i>    | 1 | 1 | 1 | 1 |
| <i>Lonchura_griseicapilla</i>    | 1 | 1 | 1 | 1 |
| <i>Lonchura_kelaarti</i>         | 1 | 1 | 1 | 1 |
| <i>Lonchura_leucogastroides</i>  | 1 | 1 | 1 | 1 |
| <i>Lonchura_maja</i>             | 1 | 1 | 1 | 1 |
| <i>Lonchura_malabarica</i>       | 1 | 1 | 1 | 1 |
| <i>Lonchura_malacca</i>          | 1 | 1 | 1 | 1 |
| <i>Lonchura_pallida</i>          | 1 | 1 | 1 | 1 |
| <i>Lonchura_punctulata</i>       | 1 | 1 | 1 | 1 |
| <i>Lonchura_quinticolor</i>      | 1 | 1 | 1 | 1 |
| <i>Lonchura_striata</i>          | 1 | 1 | 1 | 1 |
| <i>Lophaetus_occipitalis</i>     | 1 | 1 | 1 | 1 |
| <i>Lophodytes_cucullatus</i>     | 1 | 1 | 1 | 1 |
| <i>Lophoictinia_isura</i>        | 1 | 1 | 1 | 1 |
| <i>Lopholaimus_antarcticus</i>   | 1 | 1 | 1 | 1 |
| <i>Lophonetta_specularioides</i> | 1 | 1 | 1 | 1 |

|                                     |   |   |   |   |
|-------------------------------------|---|---|---|---|
| <i>Lophophanes_cristatus</i>        | 1 | 1 | 1 | 1 |
| <i>Lophophanes_dichrous</i>         | 1 | 1 | 1 | 1 |
| <i>Lophophorus_impejanus</i>        | 1 | 1 | 1 | 1 |
| <i>Lophophorus_lhuysii</i>          | 1 | 1 | 1 | 1 |
| <i>Lophophorus_sclateri</i>         | 1 | 1 | 1 | 1 |
| <i>Lophorina_superba</i>            | 1 | 1 | 1 | 1 |
| <i>Lophornis_chalybeus</i>          | 1 | 1 | 1 | 1 |
| <i>Lophornis_delattrei</i>          | 1 | 1 | 1 | 1 |
| <i>Lophornis_pavoninus</i>          | 1 | 1 | 1 | 1 |
| <i>Lophospingus_griseocristatus</i> | 1 | 1 | 1 | 1 |
| <i>Lophospingus_pusillus</i>        | 1 | 1 | 1 | 1 |
| <i>Lophostrix_cristata</i>          | 1 | 1 | 1 | 1 |
| <i>Lophotis_ruficrista</i>          | 1 | 1 | 1 | 1 |
| <i>Lophotriccus_galeatus</i>        | 1 | 1 | 1 | 1 |
| <i>Lophotriccus_pileatus</i>        | 1 | 1 | 1 | 1 |
| <i>Lophotriccus_vitiosus</i>        | 1 | 1 | 1 | 1 |
| <i>Lophozosterops_goodfellowi</i>   | 1 | 1 | 1 | 1 |
| <i>Lophozosterops_javanicus</i>     | 1 | 1 | 1 | 1 |
| <i>Lophozosterops_squamiceps</i>    | 1 | 1 | 1 | 1 |
| <i>Lophozosterops_superciliaris</i> | 1 | 1 | 1 | 1 |
| <i>Lophura_bulweri</i>              | 1 | 1 | 1 | 1 |
| <i>Lophura_diardi</i>               | 1 | 1 | 1 | 1 |
| <i>Lophura_edwardsi</i>             | 1 | 1 | 1 | 1 |
| <i>Lophura_erythrophthalma</i>      | 1 | 1 | 1 | 1 |
| <i>Lophura_hatinhensis</i>          | 1 | 1 | 1 | 1 |
| <i>Lophura_ignita</i>               | 1 | 1 | 1 | 1 |
| <i>Lophura_inornata</i>             | 1 | 1 | 1 | 1 |
| <i>Lophura_leucomelanos</i>         | 1 | 1 | 1 | 1 |
| <i>Lophura_nycthemera</i>           | 1 | 1 | 1 | 1 |
| <i>Lophura_swinhoii</i>             | 1 | 1 | 1 | 1 |
| <i>Loriculus_beryllinus</i>         | 1 | 1 | 1 | 1 |
| <i>Loriculus_catamene</i>           | 1 | 1 | 1 | 1 |
| <i>Loriculus_galgulus</i>           | 1 | 1 | 1 | 1 |
| <i>Loriculus_philippensis</i>       | 1 | 1 | 1 | 1 |
| <i>Loriculus_pusillus</i>           | 1 | 1 | 1 | 1 |
| <i>Loriculus_stigmatus</i>          | 1 | 1 | 1 | 1 |
| <i>Lorius_albidinucha</i>           | 1 | 1 | 1 | 1 |
| <i>Lorius_garrulus</i>              | 1 | 1 | 1 | 1 |
| <i>Lorius_lory</i>                  | 1 | 1 | 1 | 1 |
| <i>Loxia_curvirostra</i>            | 1 | 1 | 1 | 1 |
| <i>Loxia_leucoptera</i>             | 1 | 1 | 1 | 1 |
| <i>Loxia_pytyopsittacus</i>         | 1 | 1 | 1 | 1 |
| <i>Loxia_scotica</i>                | 1 | 1 | 1 | 1 |
| <i>Loxigilla_noctis</i>             | 1 | 1 | 1 | 1 |



|                                     |   |   |   |   |
|-------------------------------------|---|---|---|---|
| <i>Loxigilla_portoricensis</i>      | 1 | 1 | 1 | 1 |
| <i>Loxigilla_violacea</i>           | 1 | 1 | 1 | 1 |
| <i>Loxioides_bailleui</i>           | 1 | 1 | 1 | 1 |
| <i>Loxipasser_anoxanthus</i>        | 1 | 1 | 1 | 1 |
| <i>Loxops_caeruleirostris</i>       | 1 | 1 | 1 | 1 |
| <i>Loxops_coccineus</i>             | 1 | 1 | 1 | 1 |
| <i>Loxops_parva</i>                 | 1 | 1 | 1 | 1 |
| <i>Lullula_arborea</i>              | 1 | 1 | 1 | 1 |
| <i>Lurocalis_rufiventris</i>        | 1 | 1 | 1 | 1 |
| <i>Lurocalis_semitorquatus</i>      | 1 | 1 | 1 | 1 |
| <i>Luscinia_brunnea</i>             | 1 | 1 | 1 | 1 |
| <i>Luscinia_calliope</i>            | 1 | 1 | 1 | 1 |
| <i>Luscinia_cyane</i>               | 1 | 1 | 1 | 1 |
| <i>Luscinia_luscinia</i>            | 1 | 1 | 1 | 1 |
| <i>Luscinia_megarhynchos</i>        | 1 | 1 | 1 | 1 |
| <i>Luscinia_pectardens</i>          | 1 | 1 | 1 | 1 |
| <i>Luscinia_pectoralis</i>          | 1 | 1 | 1 | 1 |
| <i>Luscinia_sibilans</i>            | 1 | 1 | 1 | 1 |
| <i>Luscinia_svecica</i>             | 1 | 1 | 1 | 1 |
| <i>Lybius_bidentatus</i>            | 1 | 1 | 1 | 1 |
| <i>Lybius_dubius</i>                | 1 | 1 | 1 | 1 |
| <i>Lybius_melanopterus</i>          | 1 | 1 | 1 | 1 |
| <i>Lybius_torquatus</i>             | 1 | 1 | 1 | 1 |
| <i>Lybius_vieilloti</i>             | 1 | 1 | 1 | 1 |
| <i>Lycocorax_pyrrhopterus</i>       | 1 | 1 | 1 | 1 |
| <i>Lymnocyptes_minimus</i>          | 1 | 1 | 1 | 1 |
| <i>Lyrurus_mlokosiewiczi</i>        | 1 | 1 | 1 | 1 |
| <i>Lyrurus_tetrix</i>               | 1 | 1 | 1 | 1 |
| <i>Macgregoria_pulchra</i>          | 1 | 1 | 1 | 1 |
| <i>Machaerirhynchus_flaviventer</i> | 1 | 1 | 1 | 1 |
| <i>Machaeropterus_deliciosus</i>    | 1 | 1 | 1 | 1 |
| <i>Machaeropterus_pyrocephalus</i>  | 1 | 1 | 1 | 1 |
| <i>Machaeropterus_regulus</i>       | 1 | 1 | 1 | 1 |
| <i>Macheiramphus_alcinus</i>        | 1 | 1 | 1 | 1 |
| <i>Machetornis_rixosa</i>           | 1 | 1 | 1 | 1 |
| <i>Mackenziaena_leachii</i>         | 1 | 1 | 1 | 1 |
| <i>Mackenziaena_severa</i>          | 1 | 1 | 1 | 1 |
| <i>Macroagelaius_imthurni</i>       | 1 | 1 | 1 | 1 |
| <i>Macroagelaius_subalaris</i>      | 1 | 1 | 1 | 1 |
| <i>Macrocephalon_maleo</i>          | 1 | 1 | 0 | 1 |
| <i>Macrodipteryx_longipennis</i>    | 1 | 1 | 1 | 1 |
| <i>Macrodipteryx_vexillarius</i>    | 1 | 1 | 1 | 1 |
| <i>Macronectes_giganteus</i>        | 1 | 1 | 1 | 1 |
| <i>Macronectes_halli</i>            | 1 | 1 | 1 | 1 |

|                                    |   |   |   |   |
|------------------------------------|---|---|---|---|
| <i>Macronous_gularis</i>           | 1 | 1 | 1 | 1 |
| <i>Macronous_ptilosus</i>          | 1 | 1 | 1 | 1 |
| <i>Macronous_striaticeps</i>       | 1 | 1 | 1 | 1 |
| <i>Macronyx_croceus</i>            | 1 | 1 | 1 | 1 |
| <i>Macropygiaamboinensis</i>       | 1 | 1 | 1 | 1 |
| <i>Macropygiamackinlayi</i>        | 1 | 1 | 1 | 1 |
| <i>Macropygiaphasianella</i>       | 1 | 1 | 1 | 1 |
| <i>Macropygia_tenuirostris</i>     | 1 | 1 | 1 | 1 |
| <i>Macrosphenus_flavicans</i>      | 1 | 1 | 1 | 1 |
| <i>Macrosphenuskretschmeri</i>     | 1 | 1 | 1 | 1 |
| <i>Malacocinclabbotti</i>          | 1 | 1 | 1 | 1 |
| <i>Malacocinclacinereiceps</i>     | 1 | 1 | 1 | 1 |
| <i>Malacocinclamalaccensis</i>     | 1 | 1 | 1 | 1 |
| <i>Malacocinclasepiaria</i>        | 1 | 1 | 1 | 1 |
| <i>Malaconotus_alius</i>           | 1 | 1 | 1 | 1 |
| <i>Malaconotus_blanchoti</i>       | 1 | 1 | 1 | 1 |
| <i>Malacopteron_affine</i>         | 1 | 1 | 1 | 1 |
| <i>Malacopteron_albogulare</i>     | 1 | 1 | 1 | 1 |
| <i>Malacopteron_cinereum</i>       | 1 | 1 | 1 | 1 |
| <i>Malacopteron_magnirostre</i>    | 1 | 1 | 1 | 1 |
| <i>Malacopteron_magnum</i>         | 1 | 1 | 1 | 1 |
| <i>Malacopteron_palawanense</i>    | 1 | 1 | 1 | 1 |
| <i>Malacoptila_semicincta</i>      | 1 | 1 | 1 | 1 |
| <i>Malacorhynchus_membranaceus</i> | 1 | 1 | 1 | 1 |
| <i>Malurus_amabilis</i>            | 1 | 1 | 1 | 1 |
| <i>Malurus_coronatus</i>           | 1 | 1 | 1 | 1 |
| <i>Malurus_cyaneus</i>             | 1 | 1 | 1 | 1 |
| <i>Malurus_elegans</i>             | 1 | 1 | 1 | 1 |
| <i>Malurus_lamberti</i>            | 1 | 1 | 1 | 1 |
| <i>Malurus_leucopterus</i>         | 1 | 1 | 1 | 1 |
| <i>Malurus_melanocephalus</i>      | 1 | 1 | 1 | 1 |
| <i>Malurus_pulcherrimus</i>        | 1 | 1 | 1 | 1 |
| <i>Malurus_splendens</i>           | 1 | 1 | 1 | 1 |
| <i>Manacus_aurantiacus</i>         | 1 | 1 | 1 | 1 |
| <i>Manacus_candei</i>              | 1 | 1 | 1 | 1 |
| <i>Manacus_manacus</i>             | 1 | 1 | 1 | 1 |
| <i>Manacus_vitellinus</i>          | 1 | 1 | 1 | 1 |
| <i>Mandingoa_nitidula</i>          | 1 | 1 | 1 | 1 |
| <i>Manorina_flavigula</i>          | 1 | 1 | 1 | 1 |
| <i>Manorina_melanocephala</i>      | 1 | 1 | 1 | 1 |
| <i>Manorina_melanophrys</i>        | 1 | 1 | 1 | 1 |
| <i>Manucodia_ater</i>              | 1 | 1 | 1 | 1 |
| <i>Manucodia_chalybatus</i>        | 1 | 1 | 1 | 1 |
| <i>Manucodia_comrii</i>            | 1 | 1 | 1 | 1 |

|                                    |   |   |   |   |
|------------------------------------|---|---|---|---|
| <i>Manucodia jobiensis</i>         | 1 | 1 | 1 | 1 |
| <i>Manucodia keraudrenii</i>       | 1 | 1 | 1 | 1 |
| <i>Margaroperdix madagarensis</i>  | 1 | 1 | 1 | 1 |
| <i>Margarops fuscatus</i>          | 1 | 1 | 1 | 1 |
| <i>Margarops fuscus</i>            | 1 | 1 | 1 | 1 |
| <i>Margarornis bellulus</i>        | 1 | 1 | 1 | 1 |
| <i>Margarornis rubiginosus</i>     | 1 | 1 | 1 | 1 |
| <i>Margarornis squamiger</i>       | 1 | 1 | 1 | 1 |
| <i>Marmaronetta angustirostris</i> | 1 | 1 | 1 | 1 |
| <i>Mascarinus mascarin</i>         | 1 | 1 | 1 | 1 |
| <i>Masius chrysopterus</i>         | 1 | 1 | 1 | 1 |
| <i>Mayrornis lessoni</i>           | 1 | 1 | 1 | 1 |
| <i>Mecocerculus calopterus</i>     | 1 | 1 | 1 | 1 |
| <i>Mecocerculus leucophrys</i>     | 1 | 1 | 1 | 1 |
| <i>Mecocerculus minor</i>          | 1 | 1 | 1 | 1 |
| <i>Mecocerculus poecilocercus</i>  | 1 | 1 | 1 | 1 |
| <i>Megaceryle alcyon</i>           | 1 | 1 | 1 | 1 |
| <i>Megaceryle maxima</i>           | 1 | 1 | 1 | 1 |
| <i>Megaceryle torquata</i>         | 1 | 1 | 1 | 1 |
| <i>Megacrex inepta</i>             | 1 | 1 | 1 | 1 |
| <i>Megadyptes antipodes</i>        | 1 | 1 | 1 | 1 |
| <i>Megalaima asiatica</i>          | 1 | 1 | 1 | 1 |
| <i>Megalaima chrysopogon</i>       | 1 | 1 | 1 | 1 |
| <i>Megalaima franklinii</i>        | 1 | 1 | 1 | 1 |
| <i>Megalaima haemacephala</i>      | 1 | 1 | 1 | 1 |
| <i>Megalaima lineata</i>           | 1 | 1 | 1 | 1 |
| <i>Megalaima monticola</i>         | 1 | 1 | 1 | 1 |
| <i>Megalaima mystacophanos</i>     | 1 | 1 | 1 | 1 |
| <i>Megalaima oorti</i>             | 1 | 1 | 1 | 1 |
| <i>Megalaima virens</i>            | 1 | 1 | 1 | 1 |
| <i>Megalapteryx benhami</i>        | 1 | 1 | - | 1 |
| <i>Megalapteryx didinus</i>        | 1 | 1 | - | 1 |
| <i>Megalurus gramineus</i>         | 1 | 1 | 1 | 1 |
| <i>Megalurus palustris</i>         | 1 | 1 | 1 | 1 |
| <i>Megalurus pryeri</i>            | 1 | 1 | 1 | 1 |
| <i>Megapodius cumingii</i>         | 1 | 1 | 0 | 1 |
| <i>Megapodius decollatus</i>       | 1 | 1 | 0 | 1 |
| <i>Megapodius eremita</i>          | 1 | 1 | 0 | 1 |
| <i>Megapodius freycinet</i>        | 1 | 1 | 0 | 1 |
| <i>Megapodius layardi</i>          | 1 | 1 | 0 | 1 |
| <i>Megapodius pritchardii</i>      | 1 | 1 | 0 | 1 |
| <i>Megapodius reinwardt</i>        | 1 | 1 | 0 | 1 |
| <i>Megapodius tenimberensis</i>    | 1 | 1 | 0 | 1 |
| <i>Megarynchus pitangua</i>        | 1 | 1 | 1 | 1 |

|                                   |   |   |   |   |
|-----------------------------------|---|---|---|---|
| <i>Megascops_albogularis</i>      | 1 | 1 | 1 | 1 |
| <i>Megascops_asio</i>             | 1 | 1 | 1 | 1 |
| <i>Megascops_atricapilla</i>      | 1 | 1 | 1 | 1 |
| <i>Megascops_choliba</i>          | 1 | 1 | 1 | 1 |
| <i>Megascops_guatemalae</i>       | 1 | 1 | 1 | 1 |
| <i>Megascops_hoyi</i>             | 1 | 1 | 1 | 1 |
| <i>Megascops_kennicottii</i>      | 1 | 1 | 1 | 1 |
| <i>Megascops_koepckeae</i>        | 1 | 1 | 1 | 1 |
| <i>Megascops_trichopsis</i>       | 1 | 1 | 1 | 1 |
| <i>Megascops_watsonii</i>         | 1 | 1 | 1 | 1 |
| <i>Megastictus_margaritatus</i>   | 1 | 1 | 1 | 1 |
| <i>Megaxenops_parnaguae</i>       | 1 | 1 | 1 | 1 |
| <i>Meiglyptes_tristis</i>         | 1 | 1 | 1 | 1 |
| <i>Meiglyptes_tukki</i>           | 1 | 1 | 1 | 1 |
| <i>Melaenornis_edolioides</i>     | 1 | 1 | 1 | 1 |
| <i>Melaenornis_pallidus</i>       | 1 | 1 | 1 | 1 |
| <i>Melaenornis_silens</i>         | 1 | 1 | 1 | 1 |
| <i>Melampitta_gigantea</i>        | 1 | 1 | 1 | 1 |
| <i>Melampitta_lugubris</i>        | 1 | 1 | 1 | 1 |
| <i>Melamprosops_phaeosoma</i>     | 1 | 1 | 1 | 1 |
| <i>Melanerpes_aurifrons</i>       | 1 | 1 | 1 | 1 |
| <i>Melanerpes_cactorum</i>        | 1 | 1 | 1 | 1 |
| <i>Melanerpes_candidus</i>        | 1 | 1 | 1 | 1 |
| <i>Melanerpes_carolinus</i>       | 1 | 1 | 1 | 1 |
| <i>Melanerpes_erythrocephalus</i> | 1 | 1 | 1 | 1 |
| <i>Melanerpes_flavifrons</i>      | 1 | 1 | 1 | 1 |
| <i>Melanerpes_formicivorus</i>    | 1 | 1 | 1 | 1 |
| <i>Melanerpes_herminieri</i>      | 1 | 1 | 1 | 1 |
| <i>Melanerpes_lewis</i>           | 1 | 1 | 1 | 1 |
| <i>Melanerpes_pucherani</i>       | 1 | 1 | 1 | 1 |
| <i>Melanerpes_pygmaeus</i>        | 1 | 1 | 1 | 1 |
| <i>Melanerpes_striatus</i>        | 1 | 1 | 1 | 1 |
| <i>Melanerpes_uropygialis</i>     | 1 | 1 | 1 | 1 |
| <i>Melanitta_fusca</i>            | 1 | 1 | 1 | 1 |
| <i>Melanitta_nigra</i>            | 1 | 1 | 1 | 1 |
| <i>Melanitta_perspicillata</i>    | 1 | 1 | 1 | 1 |
| <i>Melanocharis_nigra</i>         | 1 | 1 | 1 | 1 |
| <i>Melanocharis_versteri</i>      | 1 | 1 | 1 | 1 |
| <i>Melanochlora_sultanea</i>      | 1 | 1 | 1 | 1 |
| <i>Melanocorypha_bimaculata</i>   | 1 | 1 | 1 | 1 |
| <i>Melanocorypha_calandra</i>     | 1 | 1 | 1 | 1 |
| <i>Melanocorypha_mongolica</i>    | 1 | 1 | 1 | 1 |
| <i>Melanodera_melanodera</i>      | 1 | 1 | 1 | 1 |
| <i>Melanodera_xanthogramma</i>    | 1 | 1 | 1 | 1 |

|                                   |   |   |   |   |
|-----------------------------------|---|---|---|---|
| <i>Melanodryas_cucullata</i>      | 1 | 1 | 1 | 1 |
| <i>Melanodryas_vittata</i>        | 1 | 1 | 1 | 1 |
| <i>Melanopareia_elegans</i>       | 1 | 1 | 1 | 1 |
| <i>Melanopareia_maximiliani</i>   | 1 | 1 | 1 | 1 |
| <i>Melanopareia_torquata</i>      | 1 | 1 | 1 | 1 |
| <i>Melanoptila_glabrirostris</i>  | 1 | 1 | 1 | 1 |
| <i>Melanospiza_richardsoni</i>    | 1 | 1 | 1 | 1 |
| <i>Melanotis_caerulescens</i>     | 1 | 1 | 1 | 1 |
| <i>Melanotis_hypoleucus</i>       | 1 | 1 | 1 | 1 |
| <i>Meleagris_gallopavo</i>        | 1 | 1 | 1 | 1 |
| <i>Melidectes_belfordi</i>        | 1 | 1 | 1 | 1 |
| <i>Melidectes_ochromelas</i>      | 1 | 1 | 1 | 1 |
| <i>Melidectes_torquatus</i>       | 1 | 1 | 1 | 1 |
| <i>Melidora_macrorrhina</i>       | 1 | 1 | 1 | 1 |
| <i>Melierax_canorus</i>           | 1 | 1 | 1 | 1 |
| <i>Melierax_poliopterus</i>       | 1 | 1 | 1 | 1 |
| <i>Melilestes_megarhynchus</i>    | 1 | 1 | 1 | 1 |
| <i>Meliphaga_albilineata</i>      | 1 | 1 | 1 | 1 |
| <i>Meliphaga_albonotata</i>       | 1 | 1 | 1 | 1 |
| <i>Meliphaga_analoga</i>          | 1 | 1 | 1 | 1 |
| <i>Meliphaga_aruensis</i>         | 1 | 1 | 1 | 1 |
| <i>Meliphaga_flavirictus</i>      | 1 | 1 | 1 | 1 |
| <i>Meliphaga_gracilis</i>         | 1 | 1 | 1 | 1 |
| <i>Meliphaga_lewinii</i>          | 1 | 1 | 1 | 1 |
| <i>Meliphaga_mimikae</i>          | 1 | 1 | 1 | 1 |
| <i>Meliphaga_montana</i>          | 1 | 1 | 1 | 1 |
| <i>Meliphaga_notata</i>           | 1 | 1 | 1 | 1 |
| <i>Meliphaga_orientalis</i>       | 1 | 1 | 1 | 1 |
| <i>Meliphaga_reticulata</i>       | 1 | 1 | 1 | 1 |
| <i>Melipotes_fumigatus</i>        | 1 | 1 | 1 | 1 |
| <i>Melithreptus_affinis</i>       | 1 | 1 | 1 | 1 |
| <i>Melithreptus_albogularis</i>   | 1 | 1 | 1 | 1 |
| <i>Melithreptus_brevirostris</i>  | 1 | 1 | 1 | 1 |
| <i>Melithreptus_gularis</i>       | 1 | 1 | 1 | 1 |
| <i>Melithreptus_lunatus</i>       | 1 | 1 | 1 | 1 |
| <i>Melithreptus_validirostris</i> | 1 | 1 | 1 | 1 |
| <i>Melocichla_mentalis</i>        | 1 | 1 | 1 | 1 |
| <i>Melophus_lathamii</i>          | 1 | 1 | 1 | 1 |
| <i>Melopsittacus_undulatus</i>    | 1 | 1 | 1 | 1 |
| <i>Melopyrrha_nigra</i>           | 1 | 1 | 1 | 1 |
| <i>Melospiza_georgiana</i>        | 1 | 1 | 1 | 1 |
| <i>Melospiza_lincolnii</i>        | 1 | 1 | 1 | 1 |
| <i>Melospiza_melodia</i>          | 1 | 1 | 1 | 1 |
| <i>Melozone_biarcuatum</i>        | 1 | 1 | 1 | 1 |

|                               |   |   |   |   |
|-------------------------------|---|---|---|---|
| <i>Melozone_kieneri</i>       | 1 | 1 | 1 | 1 |
| <i>Melozone_leucotis</i>      | 1 | 1 | 1 | 1 |
| <i>Menura_novaehollandiae</i> | 1 | 1 | 1 | 1 |
| <i>Merganetta_armata</i>      | 1 | 1 | 1 | 1 |
| <i>Mergellus_albellus</i>     | 1 | 1 | 1 | 1 |
| <i>Mergus_merganser</i>       | 1 | 1 | 1 | 1 |
| <i>Mergus_serrator</i>        | 1 | 1 | 1 | 1 |
| <i>Mergus_squamatus</i>       | 1 | 1 | 1 | 1 |
| <i>Meropogon_forsteni</i>     | 1 | 1 | 1 | 1 |
| <i>Merops_albicollis</i>      | 1 | 1 | 1 | 1 |
| <i>Merops_apiaster</i>        | 1 | 1 | 1 | 1 |
| <i>Merops_boehmi</i>          | 1 | 1 | 1 | 1 |
| <i>Merops_breweri</i>         | 1 | 1 | 1 | 1 |
| <i>Merops_bullockoides</i>    | 1 | 1 | 1 | 1 |
| <i>Merops_bulocki</i>         | 1 | 1 | 1 | 1 |
| <i>Merops_gularis</i>         | 1 | 1 | 1 | 1 |
| <i>Merops_hirundineus</i>     | 1 | 1 | 1 | 1 |
| <i>Merops_leschenaulti</i>    | 1 | 1 | 1 | 1 |
| <i>Merops_malimbicus</i>      | 1 | 1 | 1 | 1 |
| <i>Merops_muelleri</i>        | 1 | 1 | 1 | 1 |
| <i>Merops_nubicus</i>         | 1 | 1 | 1 | 1 |
| <i>Merops_oreobates</i>       | 1 | 1 | 1 | 1 |
| <i>Merops_orientalis</i>      | 1 | 1 | 1 | 1 |
| <i>Merops_ornatus</i>         | 1 | 1 | 1 | 1 |
| <i>Merops_persicus</i>        | 1 | 1 | 1 | 1 |
| <i>Merops_philippinus</i>     | 1 | 1 | 1 | 1 |
| <i>Merops_pusillus</i>        | 1 | 1 | 1 | 1 |
| <i>Merops_superciliosus</i>   | 1 | 1 | 1 | 1 |
| <i>Merops_variegatus</i>      | 1 | 1 | 1 | 1 |
| <i>Merops_viridis</i>         | 1 | 1 | 1 | 1 |
| <i>Merulaxis_ater</i>         | 1 | 1 | 1 | 1 |
| <i>Mesitornis_unicolor</i>    | 1 | 1 | 1 | 1 |
| <i>Mesophoyx_intermedia</i>   | 1 | 1 | 1 | 1 |
| <i>Metabolus_rugensis</i>     | 1 | 1 | 1 | 1 |
| <i>Metallura_aeneocauda</i>   | 1 | 1 | 1 | 1 |
| <i>Metallura_baroni</i>       | 1 | 1 | 1 | 1 |
| <i>Metallura_eupogon</i>      | 1 | 1 | 1 | 1 |
| <i>Metallura_odomae</i>       | 1 | 1 | 1 | 1 |
| <i>Metallura_phoebe</i>       | 1 | 1 | 1 | 1 |
| <i>Metallura_theresia</i>     | 1 | 1 | 1 | 1 |
| <i>Metallura_tyrianthina</i>  | 1 | 1 | 1 | 1 |
| <i>Metallura_williami</i>     | 1 | 1 | 1 | 1 |
| <i>Metopidius_indicus</i>     | 1 | 1 | 1 | 1 |
| <i>Metopothrix_aurantiaca</i> | 1 | 1 | 1 | 1 |

|                                  |   |   |   |   |
|----------------------------------|---|---|---|---|
| <i>Metriopelia_aymara</i>        | 1 | 1 | 1 | 1 |
| <i>Metriopelia_ceciliae</i>      | 1 | 1 | 1 | 1 |
| <i>Metriopelia_melanoptera</i>   | 1 | 1 | 1 | 1 |
| <i>Metriopelia_morenoi</i>       | 1 | 1 | 1 | 1 |
| <i>Micrastur_buckleyi</i>        | 1 | 1 | 1 | 1 |
| <i>Micrastur_gilvicollis</i>     | 1 | 1 | 1 | 1 |
| <i>Micrastur_ruficollis</i>      | 1 | 1 | 1 | 1 |
| <i>Micrastur_semitorquatus</i>   | 1 | 1 | 1 | 1 |
| <i>Micrathene_whitneyi</i>       | 1 | 1 | 1 | 1 |
| <i>Microbates_cinereiventris</i> | 1 | 1 | 1 | 1 |
| <i>Microcerculus_marginatus</i>  | 1 | 1 | 1 | 1 |
| <i>Microchera_albocoronata</i>   | 1 | 1 | 1 | 1 |
| <i>Microeca_fascinans</i>        | 1 | 1 | 1 | 1 |
| <i>Microeca_flavigaster</i>      | 1 | 1 | 1 | 1 |
| <i>Microeca_flaviventris</i>     | 1 | 1 | 1 | 1 |
| <i>Microeca_griseiceps</i>       | 1 | 1 | 1 | 1 |
| <i>Microeca_papuana</i>          | 1 | 1 | 1 | 1 |
| <i>Microhierax_caerulescens</i>  | 1 | 1 | 1 | 1 |
| <i>Microhierax_erythrogenys</i>  | 1 | 1 | 1 | 1 |
| <i>Microligea_palustris</i>      | 1 | 1 | 1 | 1 |
| <i>Micronisus_gabar</i>          | 1 | 1 | 1 | 1 |
| <i>Micropalama_himantopus</i>    | 1 | 1 | 1 | 1 |
| <i>Microparra_capensis</i>       | 1 | 1 | 1 | 1 |
| <i>Micropsitta_bruijnii</i>      | 1 | 1 | 1 | 1 |
| <i>Micropsitta_finschii</i>      | 1 | 1 | 1 | 1 |
| <i>Micropsitta_keiensis</i>      | 1 | 1 | 1 | 1 |
| <i>Micropsitta_pusio</i>         | 1 | 1 | 1 | 1 |
| <i>Microrhoptias_quixensis</i>   | 1 | 1 | 1 | 1 |
| <i>Microscelis_amaurotis</i>     | 1 | 1 | 1 | 1 |
| <i>Microstilbon_burmeisteri</i>  | 1 | 1 | 1 | 1 |
| <i>Miliaria_calandra</i>         | 1 | 1 | 1 | 1 |
| <i>Milvago_chimachima</i>        | 1 | 1 | 1 | 1 |
| <i>Milvago_chimango</i>          | 1 | 1 | 1 | 1 |
| <i>Milvus_migrans</i>            | 1 | 1 | 1 | 1 |
| <i>Milvus_milvus</i>             | 1 | 1 | 1 | 1 |
| <i>Mimizuku_gurneyi</i>          | 1 | 1 | 1 | 1 |
| <i>Mimodes_graysoni</i>          | 1 | 1 | 1 | 1 |
| <i>Mimus_dorsalis</i>            | 1 | 1 | 1 | 1 |
| <i>Mimus_gilvus</i>              | 1 | 1 | 1 | 1 |
| <i>Mimus_gundlachi</i>           | 1 | 1 | 1 | 1 |
| <i>Mimus_longicaudatus</i>       | 1 | 1 | 1 | 1 |
| <i>Mimus_patagonicus</i>         | 1 | 1 | 1 | 1 |
| <i>Mimus_polyglottos</i>         | 1 | 1 | 1 | 1 |
| <i>Mimus_saturninus</i>          | 1 | 1 | 1 | 1 |

|                                 |   |   |   |   |
|---------------------------------|---|---|---|---|
| <i>Mimus_thenca</i>             | 1 | 1 | 1 | 1 |
| <i>Mimus_triurus</i>            | 1 | 1 | 1 | 1 |
| <i>Minla_cyanouroptera</i>      | 1 | 1 | 1 | 1 |
| <i>Minla_ignotincta</i>         | 1 | 1 | 1 | 1 |
| <i>Minla_strigula</i>           | 1 | 1 | 1 | 1 |
| <i>Mino_anais</i>               | 1 | 1 | 1 | 1 |
| <i>Mino_dumontii</i>            | 1 | 1 | 1 | 1 |
| <i>Mionectes_maccomelli</i>     | 1 | 1 | 1 | 1 |
| <i>Mionectes_oleagineus</i>     | 1 | 1 | 1 | 1 |
| <i>Mionectes_olivaceus</i>      | 1 | 1 | 1 | 1 |
| <i>Mionectes_rufiventris</i>    | 1 | 1 | 1 | 1 |
| <i>Mionectes_striaticollis</i>  | 1 | 1 | 1 | 1 |
| <i>Mirafra_africana</i>         | 1 | 1 | 1 | 1 |
| <i>Mirafra_javanica</i>         | 1 | 1 | 1 | 1 |
| <i>Mirafra_passerina</i>        | 1 | 1 | 1 | 1 |
| <i>Mirafra_sabota</i>           | 1 | 1 | 1 | 1 |
| <i>Mitrephanes_olivaceus</i>    | 1 | 1 | 1 | 1 |
| <i>Mitrephanes_phaeocercus</i>  | 1 | 1 | 1 | 1 |
| <i>Mitrospingus_cassinii</i>    | 1 | 1 | 1 | 1 |
| <i>Mitrospingus_oleagineus</i>  | 1 | 1 | 1 | 1 |
| <i>Mitu_mitu</i>                | 1 | 1 | 1 | 1 |
| <i>Mitu_salvini</i>             | 1 | 1 | 1 | 1 |
| <i>Mitu_tomentosum</i>          | 1 | 1 | 1 | 1 |
| <i>Mitu_tuberosum</i>           | 1 | 1 | 1 | 1 |
| <i>Mniotilta_varia</i>          | 1 | 1 | 1 | 1 |
| <i>Modulatrix_orostruthus</i>   | 1 | 1 | 1 | 1 |
| <i>Modulatrix_stictigula</i>    | 1 | 1 | 1 | 1 |
| <i>Mohoua_albicilla</i>         | 1 | 1 | 1 | 1 |
| <i>Mohoua_novaeseelandiae</i>   | 1 | 1 | 1 | 1 |
| <i>Mohoua_ochrocephala</i>      | 1 | 1 | 1 | 1 |
| <i>Molothrus_aeneus</i>         | 1 | 1 | 1 | 1 |
| <i>Molothrus_ater</i>           | 1 | 1 | 1 | 1 |
| <i>Molothrus_badius</i>         | 1 | 1 | 1 | 1 |
| <i>Molothrus_bonariensis</i>    | 1 | 1 | 1 | 1 |
| <i>Molothrus_oryzivorus</i>     | 1 | 1 | 1 | 1 |
| <i>Molothrus_rufocollaris</i>   | 1 | 1 | 1 | 1 |
| <i>Momotus_mexicanus</i>        | 1 | 1 | 1 | 1 |
| <i>Momotus_momota</i>           | 1 | 1 | 1 | 1 |
| <i>Monarcha_axillaris</i>       | 1 | 1 | 1 | 1 |
| <i>Monarcha_barbatus</i>        | 1 | 1 | 1 | 1 |
| <i>Monarcha_castaneiventris</i> | 1 | 1 | 1 | 1 |
| <i>Monarcha_chrysomela</i>      | 1 | 1 | 1 | 1 |
| <i>Monarcha_cinereascens</i>    | 1 | 1 | 1 | 1 |
| <i>Monarcha_frater</i>          | 1 | 1 | 1 | 1 |



|                                    |   |   |   |   |
|------------------------------------|---|---|---|---|
| <i>Monarcha_godefroyi</i>          | 1 | 1 | 1 | 1 |
| <i>Monarcha_guttula</i>            | 1 | 1 | 1 | 1 |
| <i>Monarcha_leucotis</i>           | 1 | 1 | 1 | 1 |
| <i>Monarcha_manadensis</i>         | 1 | 1 | 1 | 1 |
| <i>Monarcha_melanopsis</i>         | 1 | 1 | 1 | 1 |
| <i>Monarcha_mundus</i>             | 1 | 1 | 1 | 1 |
| <i>Monarcha_richardsii</i>         | 1 | 1 | 1 | 1 |
| <i>Monarcha_rubiensis</i>          | 1 | 1 | 1 | 1 |
| <i>Monarcha_takatsukasae</i>       | 1 | 1 | 1 | 1 |
| <i>Monarcha_trivirgatus</i>        | 1 | 1 | 1 | 1 |
| <i>Monias_benschi</i>              | 1 | 1 | 1 | 1 |
| <i>Monticola_angolensis</i>        | 1 | 1 | 1 | 1 |
| <i>Monticola_brevipes</i>          | 1 | 1 | 1 | 1 |
| <i>Monticola_cinclorhynchus</i>    | 1 | 1 | 1 | 1 |
| <i>Monticola_erythronotus</i>      | 1 | 1 | 1 | 1 |
| <i>Monticola_explorator</i>        | 1 | 1 | 1 | 1 |
| <i>Monticola_gularis</i>           | 1 | 1 | 1 | 1 |
| <i>Monticola_imerinus</i>          | 1 | 1 | 1 | 1 |
| <i>Monticola_rufiventris</i>       | 1 | 1 | 1 | 1 |
| <i>Monticola_rufocinereus</i>      | 1 | 1 | 1 | 1 |
| <i>Monticola_rupestris</i>         | 1 | 1 | 1 | 1 |
| <i>Monticola_saxatilis</i>         | 1 | 1 | 1 | 1 |
| <i>Monticola_sharpei</i>           | 1 | 1 | 1 | 1 |
| <i>Monticola_solitarius</i>        | 1 | 1 | 1 | 1 |
| <i>Montifringilla_adamsi</i>       | 1 | 1 | 1 | 1 |
| <i>Montifringilla_davidiana</i>    | 1 | 1 | 1 | 1 |
| <i>Montifringilla_nivalis</i>      | 1 | 1 | 1 | 1 |
| <i>Montifringilla_ruficollis</i>   | 1 | 1 | 1 | 1 |
| <i>Montifringilla_taczanowskii</i> | 1 | 1 | 1 | 1 |
| <i>Morphnus_guianensis</i>         | 1 | 1 | 1 | 1 |
| <i>Morus_bassanus</i>              | 1 | 1 | 1 | 1 |
| <i>Morus_capensis</i>              | 1 | 1 | 1 | 1 |
| <i>Morus_serrator</i>              | 1 | 1 | 1 | 1 |
| <i>Motacilla_aguimp</i>            | 1 | 1 | 1 | 1 |
| <i>Motacilla_alba</i>              | 1 | 1 | 1 | 1 |
| <i>Motacilla_capensis</i>          | 1 | 1 | 1 | 1 |
| <i>Motacilla_cinerea</i>           | 1 | 1 | 1 | 1 |
| <i>Motacilla_citreola</i>          | 1 | 1 | 1 | 1 |
| <i>Motacilla_clara</i>             | 1 | 1 | 1 | 1 |
| <i>Motacilla_flava</i>             | 1 | 1 | 1 | 1 |
| <i>Motacilla_flaviventris</i>      | 1 | 1 | 1 | 1 |
| <i>Motacilla_madaraspatensis</i>   | 1 | 1 | 1 | 1 |
| <i>Mulleripicus_funebris</i>       | 1 | 1 | 1 | 1 |
| <i>Muscicapa_adusta</i>            | 1 | 1 | 1 | 1 |

|                                    |   |   |   |   |
|------------------------------------|---|---|---|---|
| <i>Muscicapa_aquatica</i>          | 1 | 1 | 1 | 1 |
| <i>Muscicapa_caerulescens</i>      | 1 | 1 | 1 | 1 |
| <i>Muscicapa_cassini</i>           | 1 | 1 | 1 | 1 |
| <i>Muscicapa_daurica</i>           | 1 | 1 | 1 | 1 |
| <i>Muscicapa_ferruginea</i>        | 1 | 1 | 1 | 1 |
| <i>Muscicapa_gambagae</i>          | 1 | 1 | 1 | 1 |
| <i>Muscicapa_griseisticta</i>      | 1 | 1 | 1 | 1 |
| <i>Muscicapa_infuscata</i>         | 1 | 1 | 1 | 1 |
| <i>Muscicapa_muttui</i>            | 1 | 1 | 1 | 1 |
| <i>Muscicapa_olivascens</i>        | 1 | 1 | 1 | 1 |
| <i>Muscicapa_sethsmithi</i>        | 1 | 1 | 1 | 1 |
| <i>Muscicapa_sibirica</i>          | 1 | 1 | 1 | 1 |
| <i>Muscicapella_hodgsoni</i>       | 1 | 1 | 1 | 1 |
| <i>Muscigralla_brevicauda</i>      | 1 | 1 | 1 | 1 |
| <i>Muscisaxicola_albifrons</i>     | 1 | 1 | 1 | 1 |
| <i>Muscisaxicola_albilora</i>      | 1 | 1 | 1 | 1 |
| <i>Muscisaxicola_alpinus</i>       | 1 | 1 | 1 | 1 |
| <i>Muscisaxicola_capistratus</i>   | 1 | 1 | 1 | 1 |
| <i>Muscisaxicola_cinereus</i>      | 1 | 1 | 1 | 1 |
| <i>Muscisaxicola_flavinucha</i>    | 1 | 1 | 1 | 1 |
| <i>Muscisaxicola_fluviatilis</i>   | 1 | 1 | 1 | 1 |
| <i>Muscisaxicola_frontalis</i>     | 1 | 1 | 1 | 1 |
| <i>Muscisaxicola_juninensis</i>    | 1 | 1 | 1 | 1 |
| <i>Muscisaxicola_maclovianus</i>   | 1 | 1 | 1 | 1 |
| <i>Muscisaxicola_maculirostris</i> | 1 | 1 | 1 | 1 |
| <i>Muscisaxicola_rufivertex</i>    | 1 | 1 | 1 | 1 |
| <i>Musophaga_rossae</i>            | 1 | 1 | 1 | 1 |
| <i>Musophaga_violacea</i>          | 1 | 1 | 1 | 1 |
| <i>Myadestes_coloratus</i>         | 1 | 1 | 1 | 1 |
| <i>Myadestes_elisabeth</i>         | 1 | 1 | 1 | 1 |
| <i>Myadestes_genibarbis</i>        | 1 | 1 | 1 | 1 |
| <i>Myadestes_melanops</i>          | 1 | 1 | 1 | 1 |
| <i>Myadestes_obscurus</i>          | 1 | 1 | 1 | 1 |
| <i>Myadestes_occidentalis</i>      | 1 | 1 | 1 | 1 |
| <i>Myadestes_ralloides</i>         | 1 | 1 | 1 | 1 |
| <i>Myadestes_townsendi</i>         | 1 | 1 | 1 | 1 |
| <i>Myadestes_unicolor</i>          | 1 | 1 | 1 | 1 |
| <i>Mycerobas_affinis</i>           | 1 | 1 | 1 | 1 |
| <i>Mycerobas_carnipes</i>          | 1 | 1 | 1 | 1 |
| <i>Mycteria_americana</i>          | 1 | 1 | 1 | 1 |
| <i>Mycteria_cinerea</i>            | 1 | 1 | 1 | 1 |
| <i>Mycteria_ibis</i>               | 1 | 1 | 1 | 1 |
| <i>Mycteria_leucocephala</i>       | 1 | 1 | 1 | 1 |
| <i>Myiagra_alecto</i>              | 1 | 1 | 1 | 1 |

|                                   |   |   |   |   |
|-----------------------------------|---|---|---|---|
| <i>Myiagra_caledonica</i>         | 1 | 1 | 1 | 1 |
| <i>Myiagra_cyanoleuca</i>         | 1 | 1 | 1 | 1 |
| <i>Myiagra_ferrocyanea</i>        | 1 | 1 | 1 | 1 |
| <i>Myiagra_hebetior</i>           | 1 | 1 | 1 | 1 |
| <i>Myiagra_inquieta</i>           | 1 | 1 | 1 | 1 |
| <i>Myiagra_rubecula</i>           | 1 | 1 | 1 | 1 |
| <i>Myiarchus_cinerascens</i>      | 1 | 1 | 1 | 1 |
| <i>Myiarchus_crinitus</i>         | 1 | 1 | 1 | 1 |
| <i>Myiarchus_ferox</i>            | 1 | 1 | 1 | 1 |
| <i>Myiarchus_magnirostris</i>     | 1 | 1 | 1 | 1 |
| <i>Myiarchus_swainsoni</i>        | 1 | 1 | 1 | 1 |
| <i>Myiarchus_tuberculifer</i>     | 1 | 1 | 1 | 1 |
| <i>Myiarchus_tyrannulus</i>       | 1 | 1 | 1 | 1 |
| <i>Myiobius_atricaudus</i>        | 1 | 1 | 1 | 1 |
| <i>Myiobius_barbatus</i>          | 1 | 1 | 1 | 1 |
| <i>Myiobius_sulphureipygius</i>   | 1 | 1 | 1 | 1 |
| <i>Myiobius_villosus</i>          | 1 | 1 | 1 | 1 |
| <i>Myioborus_albifacies</i>       | 1 | 1 | 1 | 1 |
| <i>Myioborus_albifrons</i>        | 1 | 1 | 1 | 1 |
| <i>Myioborus_brunniceps</i>       | 1 | 1 | 1 | 1 |
| <i>Myioborus_cardonai</i>         | 1 | 1 | 1 | 1 |
| <i>Myioborus_castaneocapillus</i> | 1 | 1 | 1 | 1 |
| <i>Myioborus_flavivertex</i>      | 1 | 1 | 1 | 1 |
| <i>Myioborus_melanocephalus</i>   | 1 | 1 | 1 | 1 |
| <i>Myioborus_miniatus</i>         | 1 | 1 | 1 | 1 |
| <i>Myioborus_ornatus</i>          | 1 | 1 | 1 | 1 |
| <i>Myioborus_pariae</i>           | 1 | 1 | 1 | 1 |
| <i>Myioborus_pictus</i>           | 1 | 1 | 1 | 1 |
| <i>Myioborus_torquatus</i>        | 1 | 1 | 1 | 1 |
| <i>Myiodynastes_luteiventris</i>  | 1 | 1 | 1 | 1 |
| <i>Myiodynastes_maculatus</i>     | 1 | 1 | 1 | 1 |
| <i>Myiomela_albiventris</i>       | 1 | 1 | 1 | 1 |
| <i>Myiomela_diana</i>             | 1 | 1 | 1 | 1 |
| <i>Myiomela_leucura</i>           | 1 | 1 | 1 | 1 |
| <i>Myiopagis_caniceps</i>         | 1 | 1 | 1 | 1 |
| <i>Myiopagis_flavivertex</i>      | 1 | 1 | 1 | 1 |
| <i>Myiopagis_gaimardii</i>        | 1 | 1 | 1 | 1 |
| <i>Myiopagis_olallai</i>          | 1 | 1 | 1 | 1 |
| <i>Myiopagis_subplacens</i>       | 1 | 1 | 1 | 1 |
| <i>Myiopagis_viridicata</i>       | 1 | 1 | 1 | 1 |
| <i>Myioparus_plumbeus</i>         | 1 | 1 | 1 | 1 |
| <i>Myiophobus_cryptoxanthus</i>   | 1 | 1 | 1 | 1 |
| <i>Myiophobus_fasciatus</i>       | 1 | 1 | 1 | 1 |
| <i>Myiophobus_flavicans</i>       | 1 | 1 | 1 | 1 |

|                                   |   |   |   |   |
|-----------------------------------|---|---|---|---|
| <i>Myiophobus_lintoni</i>         | 1 | 1 | 1 | 1 |
| <i>Myiophobus_ochraceiventris</i> | 1 | 1 | 1 | 1 |
| <i>Myiophobus_phoenicomitra</i>   | 1 | 1 | 1 | 1 |
| <i>Myiophobus_pulcher</i>         | 1 | 1 | 1 | 1 |
| <i>Myiophobus_roraimae</i>        | 1 | 1 | 1 | 1 |
| <i>Myiopsitta_monachus</i>        | 1 | 1 | 1 | 1 |
| <i>Myiornis_auricularis</i>       | 1 | 1 | 1 | 1 |
| <i>Myiornis_ecaudatus</i>         | 1 | 1 | 1 | 1 |
| <i>Myiotheretes_fumigatus</i>     | 1 | 1 | 1 | 1 |
| <i>Myiotheretes_striaticollis</i> | 1 | 1 | 1 | 1 |
| <i>Myiotriccus_ornatus</i>        | 1 | 1 | 1 | 1 |
| <i>Myiozetetes_cayanensis</i>     | 1 | 1 | 1 | 1 |
| <i>Myiozetetes_luteiventris</i>   | 1 | 1 | 1 | 1 |
| <i>Myiozetetes_similis</i>        | 1 | 1 | 1 | 1 |
| <i>Myophonus_caeruleus</i>        | 1 | 1 | 1 | 1 |
| <i>Myophonus_glaucinus</i>        | 1 | 1 | 1 | 1 |
| <i>Myophonus_melanurus</i>        | 1 | 1 | 1 | 1 |
| <i>Myornis_senilis</i>            | 1 | 1 | 1 | 1 |
| <i>Myrmeciza_atrothorax</i>       | 1 | 1 | 1 | 1 |
| <i>Myrmeciza_berlepschi</i>       | 1 | 1 | 1 | 1 |
| <i>Myrmeciza_castanea</i>         | 1 | 1 | 1 | 1 |
| <i>Myrmeciza_exsul</i>            | 1 | 1 | 1 | 1 |
| <i>Myrmeciza_ferruginea</i>       | 1 | 1 | 1 | 1 |
| <i>Myrmeciza_fortis</i>           | 1 | 1 | 1 | 1 |
| <i>Myrmeciza_goeldii</i>          | 1 | 1 | 1 | 1 |
| <i>Myrmeciza_griseiceps</i>       | 1 | 1 | 1 | 1 |
| <i>Myrmeciza_hemimelaena</i>      | 1 | 1 | 1 | 1 |
| <i>Myrmeciza_hyperythra</i>       | 1 | 1 | 1 | 1 |
| <i>Myrmeciza_immaculata</i>       | 1 | 1 | 1 | 1 |
| <i>Myrmeciza_laemosticta</i>      | 1 | 1 | 1 | 1 |
| <i>Myrmeciza_longipes</i>         | 1 | 1 | 1 | 1 |
| <i>Myrmeciza_loricata</i>         | 1 | 1 | 1 | 1 |
| <i>Myrmeciza_melanoceps</i>       | 1 | 1 | 1 | 1 |
| <i>Myrmeciza_nigricauda</i>       | 1 | 1 | 1 | 1 |
| <i>Myrmeciza_pelzelni</i>         | 1 | 1 | 1 | 1 |
| <i>Myrmeciza_squamosa</i>         | 1 | 1 | 1 | 1 |
| <i>Myrmecocichla_aethiops</i>     | 1 | 1 | 1 | 1 |
| <i>Myrmecocichla_albifrons</i>    | 1 | 1 | 1 | 1 |
| <i>Myrmecocichla_arnotti</i>      | 1 | 1 | 1 | 1 |
| <i>Myrmecocichla_melaena</i>      | 1 | 1 | 1 | 1 |
| <i>Myrmecocichla_nigra</i>        | 1 | 1 | 1 | 1 |
| <i>Myrmia_micrura</i>             | 1 | 1 | 1 | 1 |
| <i>Myrmoborus_leucophrys</i>      | 1 | 1 | 1 | 1 |
| <i>Myrmoborus_myotherinus</i>     | 1 | 1 | 1 | 1 |

|                                  |   |   |   |   |
|----------------------------------|---|---|---|---|
| <i>Myrmochanes_hemileucus</i>    | 1 | 1 | 1 | 1 |
| <i>Myrmorchilus_strigilatus</i>  | 1 | 1 | 1 | 1 |
| <i>Myrmornis_torquata</i>        | 1 | 1 | 1 | 1 |
| <i>Myrmothera_campanisona</i>    | 1 | 1 | 1 | 1 |
| <i>Myrmothera_simplex</i>        | 1 | 1 | 1 | 1 |
| <i>Myrmotherula_ambigua</i>      | 1 | 1 | 1 | 1 |
| <i>Myrmotherula_assimilis</i>    | 1 | 1 | 1 | 1 |
| <i>Myrmotherula_axillaris</i>    | 1 | 1 | 1 | 1 |
| <i>Myrmotherula_behni</i>        | 1 | 1 | 1 | 1 |
| <i>Myrmotherula_brachyura</i>    | 1 | 1 | 1 | 1 |
| <i>Myrmotherula_cherriei</i>     | 1 | 1 | 1 | 1 |
| <i>Myrmotherula_grisea</i>       | 1 | 1 | 1 | 1 |
| <i>Myrmotherula_hauxwelli</i>    | 1 | 1 | 1 | 1 |
| <i>Myrmotherula_ignota</i>       | 1 | 1 | 1 | 1 |
| <i>Myrmotherula_iheringi</i>     | 1 | 1 | 1 | 1 |
| <i>Myrmotherula_klagesi</i>      | 1 | 1 | 1 | 1 |
| <i>Myrmotherula_longicauda</i>   | 1 | 1 | 1 | 1 |
| <i>Myrmotherula_longipennis</i>  | 1 | 1 | 1 | 1 |
| <i>Myrmotherula_menetriesii</i>  | 1 | 1 | 1 | 1 |
| <i>Myrmotherula_multostriata</i> | 1 | 1 | 1 | 1 |
| <i>Myrmotherula_pacifica</i>     | 1 | 1 | 1 | 1 |
| <i>Myrmotherula_schisticolor</i> | 1 | 1 | 1 | 1 |
| <i>Myrmotherula_sclateri</i>     | 1 | 1 | 1 | 1 |
| <i>Myrmotherula_surinamensis</i> | 1 | 1 | 1 | 1 |
| <i>Myrtis_fanny</i>              | 1 | 1 | 1 | 1 |
| <i>Mystacornis_crossleyi</i>     | 1 | 1 | 1 | 1 |
| <i>Myzomela_cardinalis</i>       | 1 | 1 | 1 | 1 |
| <i>Myzomela_cineracea</i>        | 1 | 1 | 1 | 1 |
| <i>Myzomela_eques</i>            | 1 | 1 | 1 | 1 |
| <i>Myzomela_erythrocephala</i>   | 1 | 1 | 1 | 1 |
| <i>Myzomela_lafargei</i>         | 1 | 1 | 1 | 1 |
| <i>Myzomela_obscura</i>          | 1 | 1 | 1 | 1 |
| <i>Myzomela_rosenbergii</i>      | 1 | 1 | 1 | 1 |
| <i>Myzomela_sanguinolenta</i>    | 1 | 1 | 1 | 1 |
| <i>Myzornis_pyrrhoura</i>        | 1 | 1 | 1 | 1 |
| <i>Namibornis_herero</i>         | 1 | 1 | 1 | 1 |
| <i>Nandayus_nenday</i>           | 1 | 1 | 1 | 1 |
| <i>Nannopsittaca_dachilleae</i>  | 1 | 1 | 1 | 1 |
| <i>Nannopsittaca_panychlora</i>  | 1 | 1 | 1 | 1 |
| <i>Napothera_brevicaudata</i>    | 1 | 1 | 1 | 1 |
| <i>Napothera_crassa</i>          | 1 | 1 | 1 | 1 |
| <i>Napothera_crispifrons</i>     | 1 | 1 | 1 | 1 |
| <i>Napothera_epilepidota</i>     | 1 | 1 | 1 | 1 |
| <i>Napothera_macroductyla</i>    | 1 | 1 | 1 | 1 |

|                                |   |   |   |   |
|--------------------------------|---|---|---|---|
| <i>Nasica_longirostris</i>     | 1 | 1 | 1 | 1 |
| <i>Neafrapus_cassini</i>       | 1 | 1 | 1 | 1 |
| <i>Necrosyrtes_monachus</i>    | 1 | 1 | 1 | 1 |
| <i>Nectarinia_adelberti</i>    | 1 | 1 | 1 | 1 |
| <i>Nectarinia_afra</i>         | 1 | 1 | 1 | 1 |
| <i>Nectarinia_alinae</i>       | 1 | 1 | 1 | 1 |
| <i>Nectarinia_balfouri</i>     | 1 | 1 | 1 | 1 |
| <i>Nectarinia_bouvieri</i>     | 1 | 1 | 1 | 1 |
| <i>Nectarinia_chalybea</i>     | 1 | 1 | 1 | 1 |
| <i>Nectarinia_chloropygia</i>  | 1 | 1 | 1 | 1 |
| <i>Nectarinia_dussumieri</i>   | 1 | 1 | 1 | 1 |
| <i>Nectarinia_erythrocerca</i> | 1 | 1 | 1 | 1 |
| <i>Nectarinia_humbloti</i>     | 1 | 1 | 1 | 1 |
| <i>Nectarinia_jugularis</i>    | 1 | 1 | 1 | 1 |
| <i>Nectarinia_kilimensis</i>   | 1 | 1 | 1 | 1 |
| <i>Nectarinia_loveridgei</i>   | 1 | 1 | 1 | 1 |
| <i>Nectarinia_mediocris</i>    | 1 | 1 | 1 | 1 |
| <i>Nectarinia_minulla</i>      | 1 | 1 | 1 | 1 |
| <i>Nectarinia_moreau</i>       | 1 | 1 | 1 | 1 |
| <i>Nectarinia_olivacea</i>     | 1 | 1 | 1 | 1 |
| <i>Nectarinia_oritis</i>       | 1 | 1 | 1 | 1 |
| <i>Nectarinia_preussi</i>      | 1 | 1 | 1 | 1 |
| <i>Nectarinia_regia</i>        | 1 | 1 | 1 | 1 |
| <i>Nectarinia_rufipennis</i>   | 1 | 1 | 1 | 1 |
| <i>Nectarinia_senegalensis</i> | 1 | 1 | 1 | 1 |
| <i>Nectarinia_sperata</i>      | 1 | 1 | 1 | 1 |
| <i>Nectarinia_talatala</i>     | 1 | 1 | 1 | 1 |
| <i>Nectarinia_venusta</i>      | 1 | 1 | 1 | 1 |
| <i>Nemosia_pileata</i>         | 1 | 1 | 1 | 1 |
| <i>Neochelidon_tibialis</i>    | 1 | 1 | 1 | 1 |
| <i>Neochen_jubata</i>          | 1 | 1 | 1 | 1 |
| <i>Neochmia_modesta</i>        | 1 | 1 | 1 | 1 |
| <i>Neochmia_phaeton</i>        | 1 | 1 | 1 | 1 |
| <i>Neochmia_ruficauda</i>      | 1 | 1 | 1 | 1 |
| <i>Neochmia_temporalis</i>     | 1 | 1 | 1 | 1 |
| <i>Neocichla_gutturalis</i>    | 1 | 1 | 1 | 1 |
| <i>Neocossyphus_poensis</i>    | 1 | 1 | 1 | 1 |
| <i>Neocossyphus_rufus</i>      | 1 | 1 | 1 | 1 |
| <i>Neoctantes_niger</i>        | 1 | 1 | 1 | 1 |
| <i>Neodrepanis_coruscans</i>   | 1 | 1 | 1 | 1 |
| <i>Neolalage_banksiana</i>     | 1 | 1 | 1 | 1 |
| <i>Neolestes_torquatus</i>     | 1 | 1 | 1 | 1 |
| <i>Neomixis_striatigula</i>    | 1 | 1 | 1 | 1 |
| <i>Neomixis_tenella</i>        | 1 | 1 | 1 | 1 |

|                                     |   |   |   |   |
|-------------------------------------|---|---|---|---|
| <i>Neomixis_viridis</i>             | 1 | 1 | 1 | 1 |
| <i>Neomorphus_geoffroyi</i>         | 1 | 1 | 1 | 1 |
| <i>Neomorphus_rufipennis</i>        | 1 | 1 | 1 | 1 |
| <i>Neopelma_aurifrons</i>           | 1 | 1 | 1 | 1 |
| <i>Neopelma_chrysocephalum</i>      | 1 | 1 | 1 | 1 |
| <i>Neopelma_pallescens</i>          | 1 | 1 | 1 | 1 |
| <i>Neopelma_sulphureiventer</i>     | 1 | 1 | 1 | 1 |
| <i>Neophema_chrysogaster</i>        | 1 | 1 | 1 | 1 |
| <i>Neophema_chrysostoma</i>         | 1 | 1 | 1 | 1 |
| <i>Neophema_elegans</i>             | 1 | 1 | 1 | 1 |
| <i>Neophema_petrophila</i>          | 1 | 1 | 1 | 1 |
| <i>Neophema_pulchella</i>           | 1 | 1 | 1 | 1 |
| <i>Neophema_splendida</i>           | 1 | 1 | 1 | 1 |
| <i>Neophron_percnopterus</i>        | 1 | 1 | 1 | 1 |
| <i>Neopipo_cinnamomea</i>           | 1 | 1 | 1 | 1 |
| <i>Neopsephotus_bourkii</i>         | 1 | 1 | 1 | 1 |
| <i>Neopsittacus_musschenbroekii</i> | 1 | 1 | 1 | 1 |
| <i>Neopsittacus_pullicauda</i>      | 1 | 1 | 1 | 1 |
| <i>Neothraupis_fasciata</i>         | 1 | 1 | 1 | 1 |
| <i>Neotis_heuglinii</i>             | 1 | 1 | 1 | 1 |
| <i>Neoxolmis_rufiventris</i>        | 1 | 1 | 1 | 1 |
| <i>Nephelornis_oneilli</i>          | 1 | 1 | 1 | 1 |
| <i>Nesillas_typica</i>              | 1 | 1 | 1 | 1 |
| <i>Nesocharis_capistrata</i>        | 1 | 1 | 1 | 1 |
| <i>Nesocharis_shelleyi</i>          | 1 | 1 | 1 | 1 |
| <i>Nesocichla_eremita</i>           | 1 | 1 | 1 | 1 |
| <i>Nesocittes_micromegas</i>        | 1 | 1 | 1 | 1 |
| <i>Nesoenas_mayeri</i>              | 1 | 1 | 1 | 1 |
| <i>Nesomimus_macdonaldi</i>         | 1 | 1 | 1 | 1 |
| <i>Nesomimus_melanotis</i>          | 1 | 1 | 1 | 1 |
| <i>Nesomimus_parvulus</i>           | 1 | 1 | 1 | 1 |
| <i>Nesomimus_trifasciatus</i>       | 1 | 1 | 1 | 1 |
| <i>Nesopsar_nigerrimus</i>          | 1 | 1 | 1 | 1 |
| <i>Nesospingus_speculiferus</i>     | 1 | 1 | 1 | 1 |
| <i>Nesospiza_acunhae</i>            | 1 | 1 | 1 | 1 |
| <i>Nesospiza_questi</i>             | 1 | 1 | 1 | 1 |
| <i>Nesospiza_wilkinsi</i>           | 1 | 1 | 1 | 1 |
| <i>Nestor_meridionalis</i>          | 1 | 1 | 1 | 1 |
| <i>Nestor_notabilis</i>             | 1 | 1 | 1 | 1 |
| <i>Netta_peposaca</i>               | 1 | 1 | 1 | 1 |
| <i>Netta_rufina</i>                 | 1 | 1 | 1 | 1 |
| <i>Nettapus_coromandelianus</i>     | 1 | 1 | 1 | 1 |
| <i>Nettapus_pulchellus</i>          | 1 | 1 | 1 | 1 |
| <i>Newtonia_amphichroa</i>          | 1 | 1 | 1 | 1 |

|                                 |   |   |   |   |
|---------------------------------|---|---|---|---|
| <i>Newtonia_archboldi</i>       | 1 | 1 | 1 | 1 |
| <i>Newtonia_brunneicauda</i>    | 1 | 1 | 1 | 1 |
| <i>Newtonia_fanovanae</i>       | 1 | 1 | 1 | 1 |
| <i>Nicator_chloris</i>          | 1 | 1 | 1 | 1 |
| <i>Nicator_vireo</i>            | 1 | 1 | 1 | 1 |
| <i>Nigrita_bicolor</i>          | 1 | 1 | 1 | 1 |
| <i>Nigrita_canicapilla</i>      | 1 | 1 | 1 | 1 |
| <i>Nilaus_afer</i>              | 1 | 1 | 1 | 1 |
| <i>Niltava_davidi</i>           | 1 | 1 | 1 | 1 |
| <i>Niltava_grandis</i>          | 1 | 1 | 1 | 1 |
| <i>Niltava_macgrigoriae</i>     | 1 | 1 | 1 | 1 |
| <i>Niltava_sundara</i>          | 1 | 1 | 1 | 1 |
| <i>Niltava_vivida</i>           | 1 | 1 | 1 | 1 |
| <i>Ninox_boobook</i>            | 1 | 1 | 1 | 1 |
| <i>Ninox_connivens</i>          | 1 | 1 | 1 | 1 |
| <i>Ninox_natalis</i>            | 1 | 1 | 1 | 1 |
| <i>Ninox_novaeseelandiae</i>    | 1 | 1 | 1 | 1 |
| <i>Ninox_philippensis</i>       | 1 | 1 | 1 | 1 |
| <i>Ninox_rudolfi</i>            | 1 | 1 | 1 | 1 |
| <i>Ninox_rufa</i>               | 1 | 1 | 1 | 1 |
| <i>Ninox_scutulata</i>          | 1 | 1 | 1 | 1 |
| <i>Ninox_squamipila</i>         | 1 | 1 | 1 | 1 |
| <i>Ninox_strenua</i>            | 1 | 1 | 1 | 1 |
| <i>Nipponia_nippon</i>          | 1 | 1 | 1 | 1 |
| <i>Nisaetus_alboniger</i>       | 1 | 1 | 1 | 1 |
| <i>Nisaetus_bartelsi</i>        | 1 | 1 | 1 | 1 |
| <i>Nisaetus_nanus</i>           | 1 | 1 | 1 | 1 |
| <i>Nisaetus_nipalensis</i>      | 1 | 1 | 1 | 1 |
| <i>Nomonyx_dominica</i>         | 1 | 1 | 1 | 1 |
| <i>Nonnula_rubecula</i>         | 1 | 1 | 1 | 1 |
| <i>Northiella_haematogaster</i> | 1 | 1 | 1 | 1 |
| <i>Notharchus_macrorhynchos</i> | 1 | 1 | 1 | 1 |
| <i>Nothocrax_urumutum</i>       | 1 | 1 | 1 | 1 |
| <i>Nothoprocta_cinerascens</i>  | 1 | 1 | 1 | 1 |
| <i>Nothoprocta_perdicaria</i>   | 1 | 1 | 1 | 1 |
| <i>Nothura_darwinii</i>         | 1 | 1 | 1 | 1 |
| <i>Nothura_maculosa</i>         | 1 | 1 | 1 | 1 |
| <i>Notiochelidon_flavipes</i>   | 1 | 1 | 1 | 1 |
| <i>Notiochelidon_murina</i>     | 1 | 1 | 1 | 1 |
| <i>Notiochelidon_pileata</i>    | 1 | 1 | 1 | 1 |
| <i>Notiomystis_cincta</i>       | 1 | 1 | 1 | 1 |
| <i>Nucifraga_caryocatactes</i>  | 1 | 1 | 1 | 1 |
| <i>Nucifraga_columbiana</i>     | 1 | 1 | 1 | 1 |
| <i>Nucifraga_multipunctata</i>  | 1 | 1 | 1 | 1 |



|                                    |   |   |   |   |
|------------------------------------|---|---|---|---|
| <i>Numenius_americanus</i>         | 1 | 1 | 1 | 1 |
| <i>Numenius_arquata</i>            | 1 | 1 | 1 | 1 |
| <i>Numenius_madagascariensis</i>   | 1 | 1 | 1 | 1 |
| <i>Numenius_minutus</i>            | 1 | 1 | 1 | 1 |
| <i>Numenius_phaeopus</i>           | 1 | 1 | 1 | 1 |
| <i>Numenius_tahitiensis</i>        | 1 | 1 | 1 | 1 |
| <i>Numida_meleagris</i>            | 1 | 1 | 1 | 1 |
| <i>Nyctanassa_violacea</i>         | 1 | 1 | 1 | 1 |
| <i>Nyctibius_aethereus</i>         | 1 | 1 | 1 | 1 |
| <i>Nyctibius_bracteatus</i>        | 1 | 1 | 1 | 1 |
| <i>Nyctibius_grandis</i>           | 1 | 1 | 1 | 1 |
| <i>Nyctibius_griseus</i>           | 1 | 1 | 1 | 1 |
| <i>Nyctibius_jamaicensis</i>       | 1 | 1 | 1 | 1 |
| <i>Nyctibius_leucopterus</i>       | 1 | 1 | 1 | 1 |
| <i>Nyctibius_maculosus</i>         | 1 | 1 | 1 | 1 |
| <i>Nycticorax_caledonicus</i>      | 1 | 1 | 1 | 1 |
| <i>Nycticorax_nycticorax</i>       | 1 | 1 | 1 | 1 |
| <i>Nycticryphes_semicollaris</i>   | 1 | 1 | 1 | 1 |
| <i>Nyctidromus_albicollis</i>      | 1 | 1 | 1 | 1 |
| <i>Nyctiphrynus_mcleodii</i>       | 1 | 1 | 1 | 1 |
| <i>Nyctiphrynus_ocellatus</i>      | 1 | 1 | 1 | 1 |
| <i>Nyctiphrynus_rosenbergi</i>     | 1 | 1 | 1 | 1 |
| <i>Nyctiphrynus_yucatanicus</i>    | 1 | 1 | 1 | 1 |
| <i>Nyctiprogne_leucopyga</i>       | 1 | 1 | 1 | 1 |
| <i>Nyctyornis_amictus</i>          | 1 | 1 | 1 | 1 |
| <i>Nymphicus_hollandicus</i>       | 1 | 1 | 1 | 1 |
| <i>Nystalus_maculatus</i>          | 1 | 1 | 1 | 1 |
| <i>Oceanites_oceanicus</i>         | 1 | 1 | 1 | 1 |
| <i>Oceanodroma_castro</i>          | 1 | 1 | 1 | 1 |
| <i>Oceanodroma_furcata</i>         | 1 | 1 | 1 | 1 |
| <i>Oceanodroma_homochroa</i>       | 1 | 1 | 1 | 1 |
| <i>Oceanodroma_leucorhoa</i>       | 1 | 1 | 1 | 1 |
| <i>Oceanodroma_melania</i>         | 1 | 1 | 1 | 1 |
| <i>Oceanodroma_microsoma</i>       | 1 | 1 | 1 | 1 |
| <i>Oceanodroma_tethys</i>          | 1 | 1 | 1 | 1 |
| <i>Oceanodroma_tristrami</i>       | 1 | 1 | 1 | 1 |
| <i>Ochthoeca_cinnamomeiventris</i> | 1 | 1 | 1 | 1 |
| <i>Ochthoeca_diadema</i>           | 1 | 1 | 1 | 1 |
| <i>Ochthoeca_oenanthoides</i>      | 1 | 1 | 1 | 1 |
| <i>Ochthoeca_pulchella</i>         | 1 | 1 | 1 | 1 |
| <i>Ochthoeca_thoracica</i>         | 1 | 1 | 1 | 1 |
| <i>Ochthornis_littoralis</i>       | 1 | 1 | 1 | 1 |
| <i>Ocreatus_underwoodii</i>        | 1 | 1 | 1 | 1 |
| <i>Oculocincta_squamifrons</i>     | 1 | 1 | 1 | 1 |

|                                    |   |   |   |   |
|------------------------------------|---|---|---|---|
| <i>Ocyalus_latirostris</i>         | 1 | 1 | 1 | 1 |
| <i>Ocyceros_gingalensis</i>        | 1 | 1 | 1 | 1 |
| <i>Ocyphaps_lophotes</i>           | 1 | 1 | 1 | 1 |
| <i>Odontorchilus_cinereus</i>      | 1 | 1 | 1 | 1 |
| <i>Oedistoma_iliolophum</i>        | 1 | 1 | 1 | 1 |
| <i>Oedistoma_pygmaeum</i>          | 1 | 1 | 1 | 1 |
| <i>Oena_capensis</i>               | 1 | 1 | 1 | 1 |
| <i>Oenanthe_albonigra</i>          | 1 | 1 | 1 | 1 |
| <i>Oenanthe_bottae</i>             | 1 | 1 | 1 | 1 |
| <i>Oenanthe_chrysopygia</i>        | 1 | 1 | 1 | 1 |
| <i>Oenanthe_cypriaca</i>           | 1 | 1 | 1 | 1 |
| <i>Oenanthe_deserti</i>            | 1 | 1 | 1 | 1 |
| <i>Oenanthe_finschii</i>           | 1 | 1 | 1 | 1 |
| <i>Oenanthe_hispanica</i>          | 1 | 1 | 1 | 1 |
| <i>Oenanthe_isabellina</i>         | 1 | 1 | 1 | 1 |
| <i>Oenanthe_leucopyga</i>          | 1 | 1 | 1 | 1 |
| <i>Oenanthe_leucura</i>            | 1 | 1 | 1 | 1 |
| <i>Oenanthe_lugens</i>             | 1 | 1 | 1 | 1 |
| <i>Oenanthe_moesta</i>             | 1 | 1 | 1 | 1 |
| <i>Oenanthe_monacha</i>            | 1 | 1 | 1 | 1 |
| <i>Oenanthe_monticola</i>          | 1 | 1 | 1 | 1 |
| <i>Oenanthe_oenanthe</i>           | 1 | 1 | 1 | 1 |
| <i>Oenanthe_phillipsi</i>          | 1 | 1 | 1 | 1 |
| <i>Oenanthe_picata</i>             | 1 | 1 | 1 | 1 |
| <i>Oenanthe_pileata</i>            | 1 | 1 | 1 | 1 |
| <i>Oenanthe_pleschanka</i>         | 1 | 1 | 1 | 1 |
| <i>Oenanthe_xanthopyrna</i>        | 1 | 1 | 1 | 1 |
| <i>Oncostoma_cinereigulare</i>     | 1 | 1 | 1 | 1 |
| <i>Onychognathus_albirostris</i>   | 1 | 1 | 1 | 1 |
| <i>Onychognathus_blythii</i>       | 1 | 1 | 1 | 1 |
| <i>Onychognathus_frater</i>        | 1 | 1 | 1 | 1 |
| <i>Onychognathus_fulgidus</i>      | 1 | 1 | 1 | 1 |
| <i>Onychognathus_morio</i>         | 1 | 1 | 1 | 1 |
| <i>Onychognathus_nabouroup</i>     | 1 | 1 | 1 | 1 |
| <i>Onychognathus_salvadorii</i>    | 1 | 1 | 1 | 1 |
| <i>Onychognathus_tenuirostris</i>  | 1 | 1 | 1 | 1 |
| <i>Onychognathus_tristramii</i>    | 1 | 1 | 1 | 1 |
| <i>Onychognathus_walleri</i>       | 1 | 1 | 1 | 1 |
| <i>Onychoprion_aleuticus</i>       | 1 | 1 | 1 | 1 |
| <i>Onychoprion_anaethetus</i>      | 1 | 1 | 1 | 1 |
| <i>Onychoprion_fuscatus</i>        | 1 | 1 | 1 | 1 |
| <i>Onychoprion_lunatus</i>         | 1 | 1 | 1 | 1 |
| <i>Onychorhynchus_coronatus</i>    | 1 | 1 | 1 | 1 |
| <i>Onychorhynchus_occidentalis</i> | 1 | 1 | 1 | 1 |

|                                   |   |   |   |   |
|-----------------------------------|---|---|---|---|
| <i>Opisthocomus_hoazin</i>        | 1 | 1 | 1 | 1 |
| <i>Opisthoprora_euryptera</i>     | 1 | 1 | 1 | 1 |
| <i>Oporornis_agilis</i>           | 1 | 1 | 1 | 1 |
| <i>Oreoica_gutturalis</i>         | 1 | 1 | 1 | 1 |
| <i>Oreomanes_fraseri</i>          | 1 | 1 | 1 | 1 |
| <i>Oreomystis_bairdi</i>          | 1 | 1 | 1 | 1 |
| <i>Oreomystis_mana</i>            | 1 | 1 | 1 | 1 |
| <i>Oreonympha_nobilis</i>         | 1 | 1 | 1 | 1 |
| <i>Oreophasis_derbianus</i>       | 1 | 1 | 1 | 1 |
| <i>Oreopholus_ruficollis</i>      | 1 | 1 | 1 | 1 |
| <i>Oreophylax_moreirae</i>        | 1 | 1 | 1 | 1 |
| <i>Oreopsar_bolivianus</i>        | 1 | 1 | 1 | 1 |
| <i>Oreopsittacus_arfaki</i>       | 1 | 1 | 1 | 1 |
| <i>Oreortyx_pictus</i>            | 1 | 1 | 1 | 1 |
| <i>Oreoscoptes_montanus</i>       | 1 | 1 | 1 | 1 |
| <i>Oreoscopus_gutturalis</i>      | 1 | 1 | 1 | 1 |
| <i>Oreothlypis_celata</i>         | 1 | 1 | 1 | 1 |
| <i>Oreothlypis_crissalis</i>      | 1 | 1 | 1 | 1 |
| <i>Oreothlypis_gutturalis</i>     | 1 | 1 | 1 | 1 |
| <i>Oreothlypis_luciae</i>         | 1 | 1 | 1 | 1 |
| <i>Oreothlypis_peregrina</i>      | 1 | 1 | 1 | 1 |
| <i>Oreothlypis_ruficapilla</i>    | 1 | 1 | 1 | 1 |
| <i>Oreothlypis_superciliosa</i>   | 1 | 1 | 1 | 1 |
| <i>Oreothlypis_virginiae</i>      | 1 | 1 | 1 | 1 |
| <i>Oreotrochilus_chimborazo</i>   | 1 | 1 | 1 | 1 |
| <i>Oreotrochilus_estella</i>      | 1 | 1 | 1 | 1 |
| <i>Oreotrochilus_leucopleurus</i> | 1 | 1 | 1 | 1 |
| <i>Oreotrochilus_melanogaster</i> | 1 | 1 | 1 | 1 |
| <i>Origma_solitaria</i>           | 1 | 1 | 1 | 1 |
| <i>Oriolia_bernieri</i>           | 1 | 1 | 1 | 1 |
| <i>Oriolus_abiloris</i>           | 1 | 1 | 1 | 1 |
| <i>Oriolus_auratus</i>            | 1 | 1 | 1 | 1 |
| <i>Oriolus_bouroensis</i>         | 1 | 1 | 1 | 1 |
| <i>Oriolus_brachyrhynchus</i>     | 1 | 1 | 1 | 1 |
| <i>Oriolus_chinensis</i>          | 1 | 1 | 1 | 1 |
| <i>Oriolus_chlorocephalus</i>     | 1 | 1 | 1 | 1 |
| <i>Oriolus_cruentus</i>           | 1 | 1 | 1 | 1 |
| <i>Oriolus_flavocinctus</i>       | 1 | 1 | 1 | 1 |
| <i>Oriolus_forsteni</i>           | 1 | 1 | 1 | 1 |
| <i>Oriolus_hosii</i>              | 1 | 1 | 1 | 1 |
| <i>Oriolus_isabellae</i>          | 1 | 1 | 1 | 1 |
| <i>Oriolus_kundoo</i>             | 1 | 1 | 1 | 1 |
| <i>Oriolus_larvatus</i>           | 1 | 1 | 1 | 1 |
| <i>Oriolus_melanotis</i>          | 1 | 1 | 1 | 1 |

|                                  |   |   |   |   |
|----------------------------------|---|---|---|---|
| <i>Oriolus_mellianus</i>         | 1 | 1 | 1 | 1 |
| <i>Oriolus_monacha</i>           | 1 | 1 | 1 | 1 |
| <i>Oriolus_nigripennis</i>       | 1 | 1 | 1 | 1 |
| <i>Oriolus_oriolus</i>           | 1 | 1 | 1 | 1 |
| <i>Oriolus_percivali</i>         | 1 | 1 | 1 | 1 |
| <i>Oriolus_phaeochromus</i>      | 1 | 1 | 1 | 1 |
| <i>Oriolus_sagittatus</i>        | 1 | 1 | 1 | 1 |
| <i>Oriolus_steerii</i>           | 1 | 1 | 1 | 1 |
| <i>Oriolus_szalayi</i>           | 1 | 1 | 1 | 1 |
| <i>Oriolus_tenuirostris</i>      | 1 | 1 | 1 | 1 |
| <i>Oriolus_traillii</i>          | 1 | 1 | 1 | 1 |
| <i>Oriolus_xanthonotus</i>       | 1 | 1 | 1 | 1 |
| <i>Oriolus_xanthornus</i>        | 1 | 1 | 1 | 1 |
| <i>Oriturus_superciliosus</i>    | 1 | 1 | 1 | 1 |
| <i>Ornithion_brunneicapillus</i> | 1 | 1 | 1 | 1 |
| <i>Ornithion_inerme</i>          | 1 | 1 | 1 | 1 |
| <i>Oroaetus_isidori</i>          | 1 | 1 | 1 | 1 |
| <i>Ortalis_canicollis</i>        | 1 | 1 | 1 | 1 |
| <i>Ortalis_cinereiceps</i>       | 1 | 1 | 1 | 1 |
| <i>Ortalis_garrula</i>           | 1 | 1 | 1 | 1 |
| <i>Ortalis_guttata</i>           | 1 | 1 | 1 | 1 |
| <i>Ortalis_leucogastra</i>       | 1 | 1 | 1 | 1 |
| <i>Ortalis_motmot</i>            | 1 | 1 | 1 | 1 |
| <i>Ortalis_poliocephala</i>      | 1 | 1 | 1 | 1 |
| <i>Ortalis_ruficauda</i>         | 1 | 1 | 1 | 1 |
| <i>Ortalis_yetula</i>            | 1 | 1 | 1 | 1 |
| <i>Orthonyx_novaeguineae</i>     | 1 | 1 | 1 | 1 |
| <i>Orthonyx_spaldingii</i>       | 1 | 1 | 1 | 1 |
| <i>Orthonyx_temminckii</i>       | 1 | 1 | 1 | 1 |
| <i>Orthopsittaca_manilata</i>    | 1 | 1 | 1 | 1 |
| <i>Orthorhyncus_cristatus</i>    | 1 | 1 | 1 | 1 |
| <i>Orthotomus_atrogularis</i>    | 1 | 1 | 1 | 1 |
| <i>Orthotomus_cinereiceps</i>    | 1 | 1 | 1 | 1 |
| <i>Orthotomus_cucullatus</i>     | 1 | 1 | 1 | 1 |
| <i>Orthotomus_derbianus</i>      | 1 | 1 | 1 | 1 |
| <i>Orthotomus_frontalis</i>      | 1 | 1 | 1 | 1 |
| <i>Orthotomus_nigriceps</i>      | 1 | 1 | 1 | 1 |
| <i>Orthotomus_ruficeps</i>       | 1 | 1 | 1 | 1 |
| <i>Orthotomus_samarensis</i>     | 1 | 1 | 1 | 1 |
| <i>Orthotomus_sepium</i>         | 1 | 1 | 1 | 1 |
| <i>Orthotomus_sericeus</i>       | 1 | 1 | 1 | 1 |
| <i>Orthotomus_sutorius</i>       | 1 | 1 | 1 | 1 |
| <i>Ortygospiza_atricollis</i>    | 1 | 1 | 1 | 1 |
| <i>Oryzoborus_angolensis</i>     | 1 | 1 | 1 | 1 |

|                                  |   |   |   |   |
|----------------------------------|---|---|---|---|
| <i>Oryzoborus_crassirostris</i>  | 1 | 1 | 1 | 1 |
| <i>Oryzoborus_funereus</i>       | 1 | 1 | 1 | 1 |
| <i>Oryzoborus_maximiliani</i>    | 1 | 1 | 1 | 1 |
| <i>Otidiphaps_nobilis</i>        | 1 | 1 | 1 | 1 |
| <i>Otis_tarda</i>                | 1 | 1 | 1 | 1 |
| <i>Otus_bakkamoena</i>           | 1 | 1 | 1 | 1 |
| <i>Otus_brucei</i>               | 1 | 1 | 1 | 1 |
| <i>Otus_capnodes</i>             | 1 | 1 | 1 | 1 |
| <i>Otus_elegans</i>              | 1 | 1 | 1 | 1 |
| <i>Otus_flammeolus</i>           | 1 | 1 | 1 | 1 |
| <i>Otus_insularis</i>            | 1 | 1 | 1 | 1 |
| <i>Otus_ireneae</i>              | 1 | 1 | 1 | 1 |
| <i>Otus_lempiji</i>              | 1 | 1 | 1 | 1 |
| <i>Otus_lettia</i>               | 1 | 1 | 1 | 1 |
| <i>Otus_longicornis</i>          | 1 | 1 | 1 | 1 |
| <i>Otus_mayottensis</i>          | 1 | 1 | 1 | 1 |
| <i>Otus_megalotis</i>            | 1 | 1 | 1 | 1 |
| <i>Otus_mirus</i>                | 1 | 1 | 1 | 1 |
| <i>Otus_moheliensis</i>          | 1 | 1 | 1 | 1 |
| <i>Otus_pauliani</i>             | 1 | 1 | 1 | 1 |
| <i>Otus_pembaensis</i>           | 1 | 1 | 1 | 1 |
| <i>Otus_petersoni</i>            | 1 | 1 | 1 | 1 |
| <i>Otus_roboratus</i>            | 1 | 1 | 1 | 1 |
| <i>Otus_rutilus</i>              | 1 | 1 | 1 | 1 |
| <i>Otus_sanctaecatarinae</i>     | 1 | 1 | 1 | 1 |
| <i>Otus_scops</i>                | 1 | 1 | 1 | 1 |
| <i>Otus_semitorques</i>          | 1 | 1 | 1 | 1 |
| <i>Otus_senegalensis</i>         | 1 | 1 | 1 | 1 |
| <i>Otus_spilocephalus</i>        | 1 | 1 | 1 | 1 |
| <i>Otus_sunia</i>                | 1 | 1 | 1 | 1 |
| <i>Oxylabes_madagascariensis</i> | 1 | 1 | 1 | 1 |
| <i>Oxypogon_guerinii</i>         | 1 | 1 | 1 | 1 |
| <i>Oxyruncus_cristatus</i>       | 1 | 1 | 1 | 1 |
| <i>Oxyura_australis</i>          | 1 | 1 | 1 | 1 |
| <i>Oxyura_jamaicensis</i>        | 1 | 1 | 1 | 1 |
| <i>Oxyura_leucocephala</i>       | 1 | 1 | 1 | 1 |
| <i>Oxyura_maccoa</i>             | 1 | 1 | 1 | 1 |
| <i>Oxyura_vittata</i>            | 1 | 1 | 1 | 1 |
| <i>Pachycaea_flavogriseum</i>    | 1 | 1 | 1 | 1 |
| <i>Pachycephala_albiventris</i>  | 1 | 1 | 1 | 1 |
| <i>Pachycephala_arctitorquis</i> | 1 | 1 | 1 | 1 |
| <i>Pachycephala_caledonica</i>   | 1 | 1 | 1 | 1 |
| <i>Pachycephala_cinerea</i>      | 1 | 1 | 1 | 1 |
| <i>Pachycephala_citreogaster</i> | 1 | 1 | 1 | 1 |

|                                     |   |   |   |   |
|-------------------------------------|---|---|---|---|
| <i>Pachycephala_griseiceps</i>      | 1 | 1 | 1 | 1 |
| <i>Pachycephala_griseonota</i>      | 1 | 1 | 1 | 1 |
| <i>Pachycephala_grisola</i>         | 1 | 1 | 1 | 1 |
| <i>Pachycephala_hyperythra</i>      | 1 | 1 | 1 | 1 |
| <i>Pachycephala_hypoxantha</i>      | 1 | 1 | 1 | 1 |
| <i>Pachycephala_inornata</i>        | 1 | 1 | 1 | 1 |
| <i>Pachycephala_lanioides</i>       | 1 | 1 | 1 | 1 |
| <i>Pachycephala_lorentzi</i>        | 1 | 1 | 1 | 1 |
| <i>Pachycephala_melanura</i>        | 1 | 1 | 1 | 1 |
| <i>Pachycephala_modesta</i>         | 1 | 1 | 1 | 1 |
| <i>Pachycephala_nudigula</i>        | 1 | 1 | 1 | 1 |
| <i>Pachycephala_olivacea</i>        | 1 | 1 | 1 | 1 |
| <i>Pachycephala_orioloides</i>      | 1 | 1 | 1 | 1 |
| <i>Pachycephala_pectoralis</i>      | 1 | 1 | 1 | 1 |
| <i>Pachycephala_phaionota</i>       | 1 | 1 | 1 | 1 |
| <i>Pachycephala_philippinensis</i>  | 1 | 1 | 1 | 1 |
| <i>Pachycephala_rufiventris</i>     | 1 | 1 | 1 | 1 |
| <i>Pachycephala_schlegelii</i>      | 1 | 1 | 1 | 1 |
| <i>Pachycephala_simplex</i>         | 1 | 1 | 1 | 1 |
| <i>Pachycephala_soror</i>           | 1 | 1 | 1 | 1 |
| <i>Pachycephala_sulfuriventer</i>   | 1 | 1 | 1 | 1 |
| <i>Pachycephala_tenebrosa</i>       | 1 | 1 | 1 | 1 |
| <i>Pachycephala_vitiensis</i>       | 1 | 1 | 1 | 1 |
| <i>Pachycephalopsis_hattamensis</i> | 1 | 1 | 1 | 1 |
| <i>Pachycephalopsis_poliiosoma</i>  | 1 | 1 | 1 | 1 |
| <i>Pachyornis_australis</i>         | 1 | 1 | - | 1 |
| <i>Pachyornis_elephantopus</i>      | 1 | 1 | - | 1 |
| <i>Pachyornis_geranoides</i>        | 1 | 1 | - | 1 |
| <i>Pachyornis_mappini</i>           | 1 | 1 | - | 1 |
| <i>Pachyptila_desolata</i>          | 1 | 1 | 1 | 1 |
| <i>Pachyptila_salvini</i>           | 1 | 1 | 1 | 1 |
| <i>Pachyptila_turtur</i>            | 1 | 1 | 1 | 1 |
| <i>Pachyptila_vittata</i>           | 1 | 1 | 1 | 1 |
| <i>Pachyramphus_aglaiae</i>         | 1 | 1 | 1 | 1 |
| <i>Pachyramphus_albogriseus</i>     | 1 | 1 | 1 | 1 |
| <i>Pachyramphus_castaneus</i>       | 1 | 1 | 1 | 1 |
| <i>Pachyramphus_cinnamomeus</i>     | 1 | 1 | 1 | 1 |
| <i>Pachyramphus_homochrous</i>      | 1 | 1 | 1 | 1 |
| <i>Pachyramphus_major</i>           | 1 | 1 | 1 | 1 |
| <i>Pachyramphus_marginatus</i>      | 1 | 1 | 1 | 1 |
| <i>Pachyramphus_minor</i>           | 1 | 1 | 1 | 1 |
| <i>Pachyramphus_polychopterus</i>   | 1 | 1 | 1 | 1 |
| <i>Pachyramphus_rufus</i>           | 1 | 1 | 1 | 1 |
| <i>Pachyramphus_spodiurus</i>       | 1 | 1 | 1 | 1 |

|                                   |   |   |   |   |
|-----------------------------------|---|---|---|---|
| <i>Pachyramphus_surinamus</i>     | 1 | 1 | 1 | 1 |
| <i>Pachyramphus_validus</i>       | 1 | 1 | 1 | 1 |
| <i>Pachyramphus_versicolor</i>    | 1 | 1 | 1 | 1 |
| <i>Pachyramphus_viridis</i>       | 1 | 1 | 1 | 1 |
| <i>Pachyramphus_xanthogenys</i>   | 1 | 1 | 1 | 1 |
| <i>Padda_oryzivora</i>            | 1 | 1 | 1 | 1 |
| <i>Pagodroma_nivea</i>            | 1 | 1 | 1 | 1 |
| <i>Pagophila_eburnea</i>          | 1 | 1 | 1 | 1 |
| <i>Palmeria_dolei</i>             | 1 | 1 | 1 | 1 |
| <i>Pandion_haliaetus</i>          | 1 | 1 | 1 | 1 |
| <i>Panterpe_insignis</i>          | 1 | 1 | 1 | 1 |
| <i>Panurus_biarmicus</i>          | 1 | 1 | 1 | 1 |
| <i>Papasula_abbotti</i>           | 1 | 1 | 1 | 1 |
| <i>Parabuteo_unicinctus</i>       | 1 | 1 | 1 | 1 |
| <i>Paradigalla_brevicauda</i>     | 1 | 1 | 1 | 1 |
| <i>Paradigalla_carunculata</i>    | 1 | 1 | 1 | 1 |
| <i>Paradisaea_apoda</i>           | 1 | 1 | 1 | 1 |
| <i>Paradisaea_decora</i>          | 1 | 1 | 1 | 1 |
| <i>Paradisaea_guilielmi</i>       | 1 | 1 | 1 | 1 |
| <i>Paradisaea_minor</i>           | 1 | 1 | 1 | 1 |
| <i>Paradisaea_raggiana</i>        | 1 | 1 | 1 | 1 |
| <i>Paradisaea_rubra</i>           | 1 | 1 | 1 | 1 |
| <i>Paradisaea_rudolphi</i>        | 1 | 1 | 1 | 1 |
| <i>Paradoxornis_alphonsianus</i>  | 1 | 1 | 1 | 1 |
| <i>Paradoxornis_davidianus</i>    | 1 | 1 | 1 | 1 |
| <i>Paradoxornis_gularis</i>       | 1 | 1 | 1 | 1 |
| <i>Paradoxornis_guttaticollis</i> | 1 | 1 | 1 | 1 |
| <i>Paradoxornis_nipalensis</i>    | 1 | 1 | 1 | 1 |
| <i>Paradoxornis_webbianus</i>     | 1 | 1 | 1 | 1 |
| <i>Paramythia_montium</i>         | 1 | 1 | 1 | 1 |
| <i>Pardalotus_punctatus</i>       | 1 | 1 | 1 | 1 |
| <i>Pardalotus_rubricatus</i>      | 1 | 1 | 1 | 1 |
| <i>Pardalotus_striatus</i>        | 1 | 1 | 1 | 1 |
| <i>Pardirallus_sanguinolentus</i> | 1 | 1 | 1 | 1 |
| <i>Parkerthraustes_humeralis</i>  | 1 | 1 | 1 | 1 |
| <i>Parkesia_motacilla</i>         | 1 | 1 | 1 | 1 |
| <i>Parkesia_noveboracensis</i>    | 1 | 1 | 1 | 1 |
| <i>Parmoptila_jamesoni</i>        | 1 | 1 | 1 | 1 |
| <i>Paroaria_baeri</i>             | 1 | 1 | 1 | 1 |
| <i>Paroaria_capitata</i>          | 1 | 1 | 1 | 1 |
| <i>Paroaria_coronata</i>          | 1 | 1 | 1 | 1 |
| <i>Paroaria_dominicana</i>        | 1 | 1 | 1 | 1 |
| <i>Paroaria_gularis</i>           | 1 | 1 | 1 | 1 |
| <i>Parophasma_galinieri</i>       | 1 | 1 | 1 | 1 |

|                                  |   |   |   |   |
|----------------------------------|---|---|---|---|
| <i>Paroreomyza_montana</i>       | 1 | 1 | 1 | 1 |
| <i>Parotia_carolae</i>           | 1 | 1 | 1 | 1 |
| <i>Parotia_helenae</i>           | 1 | 1 | 1 | 1 |
| <i>Parotia_lawesii</i>           | 1 | 1 | 1 | 1 |
| <i>Parotia_sefilata</i>          | 1 | 1 | 1 | 1 |
| <i>Parotia_wahnesi</i>           | 1 | 1 | 1 | 1 |
| <i>Parus_afer</i>                | 1 | 1 | 1 | 1 |
| <i>Parus_albiventris</i>         | 1 | 1 | 1 | 1 |
| <i>Parus_bokharensis</i>         | 1 | 1 | 1 | 1 |
| <i>Parus_fasciiventer</i>        | 1 | 1 | 1 | 1 |
| <i>Parus_funereus</i>            | 1 | 1 | 1 | 1 |
| <i>Parus_holsti</i>              | 1 | 1 | 1 | 1 |
| <i>Parus_major</i>               | 1 | 1 | 1 | 1 |
| <i>Parus_monticolus</i>          | 1 | 1 | 1 | 1 |
| <i>Parus_niger</i>               | 1 | 1 | 1 | 1 |
| <i>Parus_rufiventris</i>         | 1 | 1 | 1 | 1 |
| <i>Parus_rufonuchalis</i>        | 1 | 1 | 1 | 1 |
| <i>Parus_spilonotus</i>          | 1 | 1 | 1 | 1 |
| <i>Parus_varius</i>              | 1 | 1 | 1 | 1 |
| <i>Parus_venustulus</i>          | 1 | 1 | 1 | 1 |
| <i>Parus_xanthogenys</i>         | 1 | 1 | 1 | 1 |
| <i>Passer_ammодendri</i>         | 1 | 1 | 1 | 1 |
| <i>Passer_domesticus</i>         | 1 | 1 | 1 | 1 |
| <i>Passer_flaveolus</i>          | 1 | 1 | 1 | 1 |
| <i>Passer_griseus</i>            | 1 | 1 | 1 | 1 |
| <i>Passer_hispaniolensis</i>     | 1 | 1 | 1 | 1 |
| <i>Passer_insularis</i>          | 1 | 1 | 1 | 1 |
| <i>Passer_luteus</i>             | 1 | 1 | 1 | 1 |
| <i>Passer_melanurus</i>          | 1 | 1 | 1 | 1 |
| <i>Passer_montanus</i>           | 1 | 1 | 1 | 1 |
| <i>Passer_rutilans</i>           | 1 | 1 | 1 | 1 |
| <i>Passerculus_sandwichensis</i> | 1 | 1 | 1 | 1 |
| <i>Passerella_iliaca</i>         | 1 | 1 | 1 | 1 |
| <i>Passerina_amoena</i>          | 1 | 1 | 1 | 1 |
| <i>Passerina_caerulea</i>        | 1 | 1 | 1 | 1 |
| <i>Passerina_ciris</i>           | 1 | 1 | 1 | 1 |
| <i>Passerina_cyanea</i>          | 1 | 1 | 1 | 1 |
| <i>Passerina_leclancherii</i>    | 1 | 1 | 1 | 1 |
| <i>Passerina_rositae</i>         | 1 | 1 | 1 | 1 |
| <i>Passerina_versicolor</i>      | 1 | 1 | 1 | 1 |
| <i>Patagioenas_araucana</i>      | 1 | 1 | 1 | 1 |
| <i>Patagioenas_cayennensis</i>   | 1 | 1 | 1 | 1 |
| <i>Patagioenas_fasciata</i>      | 1 | 1 | 1 | 1 |
| <i>Patagioenas_flaviostris</i>   | 1 | 1 | 1 | 1 |



|                                  |   |   |   |   |
|----------------------------------|---|---|---|---|
| <i>Patagioenas_leucocephala</i>  | 1 | 1 | 1 | 1 |
| <i>Patagioenas_maculosa</i>      | 1 | 1 | 1 | 1 |
| <i>Patagioenas_oenops</i>        | 1 | 1 | 1 | 1 |
| <i>Patagioenas_picazuro</i>      | 1 | 1 | 1 | 1 |
| <i>Patagioenas_plumbea</i>       | 1 | 1 | 1 | 1 |
| <i>Patagioenas_speciosa</i>      | 1 | 1 | 1 | 1 |
| <i>Patagioenas_squamosa</i>      | 1 | 1 | 1 | 1 |
| <i>Patagioenas_subvinacea</i>    | 1 | 1 | 1 | 1 |
| <i>Patagona_gigas</i>            | 1 | 1 | 1 | 1 |
| <i>Pauxi_pauxi</i>               | 1 | 1 | 1 | 1 |
| <i>Pauxi_unicornis</i>           | 1 | 1 | 1 | 1 |
| <i>Pavo_cristatus</i>            | 1 | 1 | 1 | 1 |
| <i>Pavo_muticus</i>              | 1 | 1 | 1 | 1 |
| <i>Pedionomus_torquatus</i>      | 1 | 1 | 1 | 1 |
| <i>Pelagodroma_marina</i>        | 1 | 1 | 1 | 1 |
| <i>Pelargopsis_capensis</i>      | 1 | 1 | 1 | 1 |
| <i>Pelecanoides_garnotii</i>     | 1 | 1 | 1 | 1 |
| <i>Pelecanoides_georgicus</i>    | 1 | 1 | 1 | 1 |
| <i>Pelecanoides_magellani</i>    | 1 | 1 | 1 | 1 |
| <i>Pelecanoides_urinatrix</i>    | 1 | 1 | 1 | 1 |
| <i>Pelecanus_conspicillatus</i>  | 1 | 1 | 1 | 1 |
| <i>Pelecanus_crispus</i>         | 1 | 1 | 1 | 1 |
| <i>Pelecanus_erythrorhynchos</i> | 1 | 1 | 1 | 1 |
| <i>Pelecanus_occidentalis</i>    | 1 | 1 | 1 | 1 |
| <i>Pelecanus_onocrotalus</i>     | 1 | 1 | 1 | 1 |
| <i>Pellorneum_albiventre</i>     | 1 | 1 | 1 | 1 |
| <i>Pellorneum_capistratum</i>    | 1 | 1 | 1 | 1 |
| <i>Pellorneum_pyrrogenys</i>     | 1 | 1 | 1 | 1 |
| <i>Pellorneum_ruficeps</i>       | 1 | 1 | 1 | 1 |
| <i>Pellorneum_tickelli</i>       | 1 | 1 | 1 | 1 |
| <i>Peltohyas_australis</i>       | 1 | 1 | 1 | 1 |
| <i>Peltops_blainvillii</i>       | 1 | 1 | 1 | 1 |
| <i>Penelope_argyrotis</i>        | 1 | 1 | 1 | 1 |
| <i>Penelope_jacquacu</i>         | 1 | 1 | 1 | 1 |
| <i>Penelope_montagnii</i>        | 1 | 1 | 1 | 1 |
| <i>Penelope_obscura</i>          | 1 | 1 | 1 | 1 |
| <i>Penelope_ochrogaster</i>      | 1 | 1 | 1 | 1 |
| <i>Penelope_purpurascens</i>     | 1 | 1 | 1 | 1 |
| <i>Penelope_superciliaris</i>    | 1 | 1 | 1 | 1 |
| <i>Penelopides_manillae</i>      | 1 | 1 | 1 | 1 |
| <i>Penelopides_panini</i>        | 1 | 1 | 1 | 1 |
| <i>Penelopina_nigra</i>          | 1 | 1 | 1 | 1 |
| <i>Peneoanthe_pulverulenta</i>   | 1 | 1 | 1 | 1 |
| <i>Peneothello_bimaculata</i>    | 1 | 1 | 1 | 1 |

|                                   |   |   |   |   |
|-----------------------------------|---|---|---|---|
| <i>Peneothello_cyanus</i>         | 1 | 1 | 1 | 1 |
| <i>Peneothello_sigillata</i>      | 1 | 1 | 1 | 1 |
| <i>Percnostola_lophotes</i>       | 1 | 1 | 1 | 1 |
| <i>Percnostola_rufifrons</i>      | 1 | 1 | 1 | 1 |
| <i>Percnostola_saturata</i>       | 1 | 1 | 1 | 1 |
| <i>Percnostola_schistacea</i>     | 1 | 1 | 1 | 1 |
| <i>Perdicula_asiatica</i>         | 1 | 1 | 1 | 1 |
| <i>Perdix_daurica</i>             | 1 | 1 | 1 | 1 |
| <i>Perdix_hodgsoniae</i>          | 1 | 1 | 1 | 1 |
| <i>Perdix_perdix</i>              | 1 | 1 | 1 | 1 |
| <i>Pericrocotus_brevirostris</i>  | 1 | 1 | 1 | 1 |
| <i>Pericrocotus_cantonensis</i>   | 1 | 1 | 1 | 1 |
| <i>Pericrocotus_cinnamomeus</i>   | 1 | 1 | 1 | 1 |
| <i>Pericrocotus_divaricatus</i>   | 1 | 1 | 1 | 1 |
| <i>Pericrocotus_erythropygius</i> | 1 | 1 | 1 | 1 |
| <i>Pericrocotus_ethologus</i>     | 1 | 1 | 1 | 1 |
| <i>Pericrocotus_flammeus</i>      | 1 | 1 | 1 | 1 |
| <i>Pericrocotus_igneus</i>        | 1 | 1 | 1 | 1 |
| <i>Pericrocotus_lansbergei</i>    | 1 | 1 | 1 | 1 |
| <i>Pericrocotus_miniatus</i>      | 1 | 1 | 1 | 1 |
| <i>Pericrocotus_roseus</i>        | 1 | 1 | 1 | 1 |
| <i>Pericrocotus_solaris</i>       | 1 | 1 | 1 | 1 |
| <i>Pericrocotus_speciosus</i>     | 1 | 1 | 1 | 1 |
| <i>Pericrocotus_tegimae</i>       | 1 | 1 | 1 | 1 |
| <i>Periparus_amabilis</i>         | 1 | 1 | 1 | 1 |
| <i>Periparus_ater</i>             | 1 | 1 | 1 | 1 |
| <i>Periparus_elegans</i>          | 1 | 1 | 1 | 1 |
| <i>Periparus_rubidiventris</i>    | 1 | 1 | 1 | 1 |
| <i>Periporphyrus_erythromelas</i> | 1 | 1 | 1 | 1 |
| <i>Perisoreus_canadensis</i>      | 1 | 1 | 1 | 1 |
| <i>Perisoreus_infaustus</i>       | 1 | 1 | 1 | 1 |
| <i>Perisoreus_internigrans</i>    | 1 | 1 | 1 | 1 |
| <i>Perissocephalus_tricolor</i>   | 1 | 1 | 1 | 1 |
| <i>Pernis_apivorus</i>            | 1 | 1 | 1 | 1 |
| <i>Pernis_celebensis</i>          | 1 | 1 | 1 | 1 |
| <i>Pernis_ptilorhynchus</i>       | 1 | 1 | 1 | 1 |
| <i>Petrochelidon_ariel</i>        | 1 | 1 | 1 | 1 |
| <i>Petrochelidon_fluvicola</i>    | 1 | 1 | 1 | 1 |
| <i>Petrochelidon_fulva</i>        | 1 | 1 | 1 | 1 |
| <i>Petrochelidon_pyrrhonota</i>   | 1 | 1 | 1 | 1 |
| <i>Petrochelidon_rufigula</i>     | 1 | 1 | 1 | 1 |
| <i>Petrochelidon_rufocollaris</i> | 1 | 1 | 1 | 1 |
| <i>Petroica_australis</i>         | 1 | 1 | 1 | 1 |
| <i>Petroica_goodenovii</i>        | 1 | 1 | 1 | 1 |

|                                       |   |   |   |   |
|---------------------------------------|---|---|---|---|
| <i>Petroica_macrocephala</i>          | 1 | 1 | 1 | 1 |
| <i>Petroica_multicolor</i>            | 1 | 1 | 1 | 1 |
| <i>Petroica_phoenicea</i>             | 1 | 1 | 1 | 1 |
| <i>Petroica_rodinogaster</i>          | 1 | 1 | 1 | 1 |
| <i>Petroica_rosea</i>                 | 1 | 1 | 1 | 1 |
| <i>Petroica_traversi</i>              | 1 | 1 | 1 | 1 |
| <i>Petronia_petronia</i>              | 1 | 1 | 1 | 1 |
| <i>Petrophassa_albipennis</i>         | 1 | 1 | 1 | 1 |
| <i>Peucaea_botterii</i>               | 1 | 1 | 1 | 1 |
| <i>Peucedramus_taeniatus</i>          | 1 | 1 | 1 | 1 |
| <i>Pezopetes_capitalis</i>            | 1 | 1 | 1 | 1 |
| <i>Pezophaps_solitaria</i>            | 1 | 1 | 1 | 1 |
| <i>Pezoporus_occidentalis</i>         | 1 | 1 | 1 | 1 |
| <i>Pezoporus_wallicus</i>             | 1 | 1 | 1 | 1 |
| <i>Phacellodomus_erythrophthalmus</i> | 1 | 1 | 1 | 1 |
| <i>Phacellodomus_maculipectus</i>     | 1 | 1 | 1 | 1 |
| <i>Phacellodomus_ruber</i>            | 1 | 1 | 1 | 1 |
| <i>Phacellodomus_rufifrons</i>        | 1 | 1 | 1 | 1 |
| <i>Phacellodomus_striaticeps</i>      | 1 | 1 | 1 | 1 |
| <i>Phacellodomus_striaticollis</i>    | 1 | 1 | 1 | 1 |
| <i>Phaenicophaeus_curvirostris</i>    | 1 | 1 | 1 | 1 |
| <i>Phaenicophaeus_superciliosus</i>   | 1 | 1 | 1 | 1 |
| <i>Phaenicophilus_palmarum</i>        | 1 | 1 | 1 | 1 |
| <i>Phaenicophilus_poliocephalus</i>   | 1 | 1 | 1 | 1 |
| <i>Phaenostictus_mcleannani</i>       | 1 | 1 | 1 | 1 |
| <i>Phaeomyias_murina</i>              | 1 | 1 | 1 | 1 |
| <i>Phaeothlypis_fulvicauda</i>        | 1 | 1 | 1 | 1 |
| <i>Phaethon_aethereus</i>             | 1 | 1 | 1 | 1 |
| <i>Phaethon_lepturus</i>              | 1 | 1 | 1 | 1 |
| <i>Phaethon_rubricauda</i>            | 1 | 1 | 1 | 1 |
| <i>Phaethornis_anthophilus</i>        | 1 | 1 | 1 | 1 |
| <i>Phaethornis_atrimentalis</i>       | 1 | 1 | 1 | 1 |
| <i>Phaethornis_augusti</i>            | 1 | 1 | 1 | 1 |
| <i>Phaethornis_bourcierii</i>         | 1 | 1 | 1 | 1 |
| <i>Phaethornis_eurynome</i>           | 1 | 1 | 1 | 1 |
| <i>Phaethornis_griseogularis</i>      | 1 | 1 | 1 | 1 |
| <i>Phaethornis_guy</i>                | 1 | 1 | 1 | 1 |
| <i>Phaethornis_hispidus</i>           | 1 | 1 | 1 | 1 |
| <i>Phaethornis_koepckeae</i>          | 1 | 1 | 1 | 1 |
| <i>Phaethornis_longirostris</i>       | 1 | 1 | 1 | 1 |
| <i>Phaethornis_longuemareus</i>       | 1 | 1 | 1 | 1 |
| <i>Phaethornis_malaris</i>            | 1 | 1 | 1 | 1 |
| <i>Phaethornis_philippii</i>          | 1 | 1 | 1 | 1 |
| <i>Phaethornis_pretrei</i>            | 1 | 1 | 1 | 1 |

|                                   |   |   |   |   |
|-----------------------------------|---|---|---|---|
| <i>Phaethornis_ruber</i>          | 1 | 1 | 1 | 1 |
| <i>Phaethornis_striigularis</i>   | 1 | 1 | 1 | 1 |
| <i>Phaethornis_subochraceus</i>   | 1 | 1 | 1 | 1 |
| <i>Phaethornis_superciliosus</i>  | 1 | 1 | 1 | 1 |
| <i>Phaethornis_syrmatophorus</i>  | 1 | 1 | 1 | 1 |
| <i>Phaethornis_yaruqui</i>        | 1 | 1 | 1 | 1 |
| <i>Phaetusa_simplex</i>           | 1 | 1 | 1 | 1 |
| <i>Phainopepla_nitens</i>         | 1 | 1 | 1 | 1 |
| <i>Phainoptila_melanoxantha</i>   | 1 | 1 | 1 | 1 |
| <i>Phalacrocorax_aristotelis</i>  | 1 | 1 | 1 | 1 |
| <i>Phalacrocorax_atriceps</i>     | 1 | 1 | 1 | 1 |
| <i>Phalacrocorax_auritus</i>      | 1 | 1 | 1 | 1 |
| <i>Phalacrocorax_brasilianus</i>  | 1 | 1 | 1 | 1 |
| <i>Phalacrocorax_carbo</i>        | 1 | 1 | 1 | 1 |
| <i>Phalacrocorax_chalconotus</i>  | 1 | 1 | 1 | 1 |
| <i>Phalacrocorax_pelagicus</i>    | 1 | 1 | 1 | 1 |
| <i>Phalacrocorax_penicillatus</i> | 1 | 1 | 1 | 1 |
| <i>Phalacrocorax_punctatus</i>    | 1 | 1 | 1 | 1 |
| <i>Phalacrocorax_sulcirostris</i> | 1 | 1 | 1 | 1 |
| <i>Phalacrocorax_urile</i>        | 1 | 1 | 1 | 1 |
| <i>Phalacrocorax_varius</i>       | 1 | 1 | 1 | 1 |
| <i>Phalaenoptilus_nuttallii</i>   | 1 | 1 | 1 | 1 |
| <i>Phalaropus_fulicaria</i>       | 1 | 1 | 1 | 1 |
| <i>Phalaropus_lobatus</i>         | 1 | 1 | 1 | 1 |
| <i>Phalaropus_tricolor</i>        | 1 | 1 | 1 | 1 |
| <i>Phalcoboenus_albogularis</i>   | 1 | 1 | 1 | 1 |
| <i>Phalcoboenus_australis</i>     | 1 | 1 | 1 | 1 |
| <i>Phalcoboenus_carunculatus</i>  | 1 | 1 | 1 | 1 |
| <i>Phalcoboenus_megalopterus</i>  | 1 | 1 | 1 | 1 |
| <i>Phapitreron_amethystinus</i>   | 1 | 1 | 1 | 1 |
| <i>Phapitreron_leucotis</i>       | 1 | 1 | 1 | 1 |
| <i>Phaps_chalcoptera</i>          | 1 | 1 | 1 | 1 |
| <i>Pharomachrus_antisianus</i>    | 1 | 1 | 1 | 1 |
| <i>Pharomachrus_auriceps</i>      | 1 | 1 | 1 | 1 |
| <i>Pharomachrus_fulgidus</i>      | 1 | 1 | 1 | 1 |
| <i>Pharomachrus_mocinno</i>       | 1 | 1 | 1 | 1 |
| <i>Pharomachrus_pavoninus</i>     | 1 | 1 | 1 | 1 |
| <i>Phasianus_colchicus</i>        | 1 | 1 | 1 | 1 |
| <i>Phasianus_versicolor</i>       | 1 | 1 | 1 | 1 |
| <i>Phedina_borbonica</i>          | 1 | 1 | 1 | 1 |
| <i>Phedina_brazzae</i>            | 1 | 1 | 1 | 1 |
| <i>Phegornis_mitchellii</i>       | 1 | 1 | 1 | 1 |
| <i>Pheucticus_aureoventris</i>    | 1 | 1 | 1 | 1 |
| <i>Pheucticus_ludovicianus</i>    | 1 | 1 | 1 | 1 |

|                                     |   |   |   |   |
|-------------------------------------|---|---|---|---|
| <i>Pheucticus_melanocephalus</i>    | 1 | 1 | 1 | 1 |
| <i>Pheugopedius_coraya</i>          | 1 | 1 | 1 | 1 |
| <i>Phigys_solitarius</i>            | 1 | 1 | 1 | 1 |
| <i>Philemon_argenticeps</i>         | 1 | 1 | 1 | 1 |
| <i>Philemon_buceroides</i>          | 1 | 1 | 1 | 1 |
| <i>Philemon_citreogularis</i>       | 1 | 1 | 1 | 1 |
| <i>Philemon_corniculatus</i>        | 1 | 1 | 1 | 1 |
| <i>Philemon_meyeri</i>              | 1 | 1 | 1 | 1 |
| <i>Philentoma_pyrhoptera</i>        | 1 | 1 | 1 | 1 |
| <i>Philentoma_velata</i>            | 1 | 1 | 1 | 1 |
| <i>Philepitta_castanea</i>          | 1 | 1 | 1 | 1 |
| <i>Philesturnus_carunculatus</i>    | 1 | 1 | 1 | 1 |
| <i>Philetairus_socius</i>           | 1 | 1 | 1 | 1 |
| <i>Philohydor_lictor</i>            | 1 | 1 | 1 | 1 |
| <i>Philomachus_pugnax</i>           | 1 | 1 | 1 | 1 |
| <i>Philydor_atricapillus</i>        | 1 | 1 | 1 | 1 |
| <i>Philydor_lichtensteini</i>       | 1 | 1 | 1 | 1 |
| <i>Philydor_pyrrhodes</i>           | 1 | 1 | 1 | 1 |
| <i>Philydor_ruficaudatum</i>        | 1 | 1 | 1 | 1 |
| <i>Phimosus_infuscatus</i>          | 1 | 1 | 1 | 1 |
| <i>Phlegopsis_erythroptera</i>      | 1 | 1 | 1 | 1 |
| <i>Phlegopsis_nigromaculata</i>     | 1 | 1 | 1 | 1 |
| <i>Phleocryptes_melanops</i>        | 1 | 1 | 1 | 1 |
| <i>Phlogophilus_hemileucurus</i>    | 1 | 1 | 1 | 1 |
| <i>Phodilus_badius</i>              | 1 | 1 | 1 | 1 |
| <i>Phoebastria_albatrus</i>         | 1 | 1 | 1 | 1 |
| <i>Phoebastria_immutabilis</i>      | 1 | 1 | 1 | 1 |
| <i>Phoebastria_irrorata</i>         | 1 | 1 | 1 | 1 |
| <i>Phoebastria_nigripes</i>         | 1 | 1 | 1 | 1 |
| <i>Phoebetria_fusca</i>             | 1 | 1 | 1 | 1 |
| <i>Phoebetria_palpebrata</i>        | 1 | 1 | 1 | 1 |
| <i>Phoenicircus_nigricollis</i>     | 1 | 1 | 1 | 1 |
| <i>Phoeniconaias_minor</i>          | 1 | 1 | 1 | 1 |
| <i>Phoenicoparrus_andinus</i>       | 1 | 1 | 1 | 1 |
| <i>Phoenicoparrus_jamesi</i>        | 1 | 1 | 1 | 1 |
| <i>Phoenicopterus_chilensis</i>     | 1 | 1 | 1 | 1 |
| <i>Phoenicopterus_roseus</i>        | 1 | 1 | 1 | 1 |
| <i>Phoenicopterus_ruber</i>         | 1 | 1 | 1 | 1 |
| <i>Phoeniculus_damarensis</i>       | 1 | 1 | 1 | 1 |
| <i>Phoeniculus_purpureus</i>        | 1 | 1 | 1 | 1 |
| <i>Phoenicurus_aureus</i>           | 1 | 1 | 1 | 1 |
| <i>Phoenicurus_caeruleocephalus</i> | 1 | 1 | 1 | 1 |
| <i>Phoenicurus_erythrogastrus</i>   | 1 | 1 | 1 | 1 |
| <i>Phoenicurus_erythronotus</i>     | 1 | 1 | 1 | 1 |

|                                      |   |   |   |   |
|--------------------------------------|---|---|---|---|
| <i>Phoenicurus_frontalis</i>         | 1 | 1 | 1 | 1 |
| <i>Phoenicurus_hodgsoni</i>          | 1 | 1 | 1 | 1 |
| <i>Phoenicurus_moussieri</i>         | 1 | 1 | 1 | 1 |
| <i>Phoenicurus_ochruros</i>          | 1 | 1 | 1 | 1 |
| <i>Phoenicurus_phoenicurus</i>       | 1 | 1 | 1 | 1 |
| <i>Phoenicurus_schisticeps</i>       | 1 | 1 | 1 | 1 |
| <i>Pholidornis_rushiae</i>           | 1 | 1 | 1 | 1 |
| <i>Phonygammus_keraudrenii</i>       | 1 | 1 | 1 | 1 |
| <i>Phrygilus_alaudinus</i>           | 1 | 1 | 1 | 1 |
| <i>Phrygilus_atriceps</i>            | 1 | 1 | 1 | 1 |
| <i>Phrygilus_carbonarius</i>         | 1 | 1 | 1 | 1 |
| <i>Phrygilus_dorsalis</i>            | 1 | 1 | 1 | 1 |
| <i>Phrygilus_fruticeti</i>           | 1 | 1 | 1 | 1 |
| <i>Phrygilus_gayi</i>                | 1 | 1 | 1 | 1 |
| <i>Phrygilus_patagonicus</i>         | 1 | 1 | 1 | 1 |
| <i>Phrygilus_plebejus</i>            | 1 | 1 | 1 | 1 |
| <i>Phrygilus_unicolor</i>            | 1 | 1 | 1 | 1 |
| <i>Phylidonyris_albifrons</i>        | 1 | 1 | 1 | 1 |
| <i>Phylidonyris_melanops</i>         | 1 | 1 | 1 | 1 |
| <i>Phylidonyris_nigra</i>            | 1 | 1 | 1 | 1 |
| <i>Phylidonyris_novaeollandiae</i>   | 1 | 1 | 1 | 1 |
| <i>Phylidonyris_pyrrhoptera</i>      | 1 | 1 | 1 | 1 |
| <i>Phyllanthus_atripennis</i>        | 1 | 1 | 1 | 1 |
| <i>Phyllastrephus_albigularis</i>    | 1 | 1 | 1 | 1 |
| <i>Phyllastrephus_cabanisi</i>       | 1 | 1 | 1 | 1 |
| <i>Phyllastrephus_cerviniventris</i> | 1 | 1 | 1 | 1 |
| <i>Phyllastrephus_debilis</i>        | 1 | 1 | 1 | 1 |
| <i>Phyllastrephus_fischeri</i>       | 1 | 1 | 1 | 1 |
| <i>Phyllastrephus_flavostriatus</i>  | 1 | 1 | 1 | 1 |
| <i>Phyllastrephus_hypochloris</i>    | 1 | 1 | 1 | 1 |
| <i>Phyllastrephus_icterinus</i>      | 1 | 1 | 1 | 1 |
| <i>Phyllastrephus_lorenzi</i>        | 1 | 1 | 1 | 1 |
| <i>Phyllastrephus_poensis</i>        | 1 | 1 | 1 | 1 |
| <i>Phyllastrephus_strepitans</i>     | 1 | 1 | 1 | 1 |
| <i>Phyllastrephus_terrestris</i>     | 1 | 1 | 1 | 1 |
| <i>Phyllastrephus_xavieri</i>        | 1 | 1 | 1 | 1 |
| <i>Phyllomyias_burmeisteri</i>       | 1 | 1 | 1 | 1 |
| <i>Phyllomyias_fasciatus</i>         | 1 | 1 | 1 | 1 |
| <i>Phyllomyias_griseiceps</i>        | 1 | 1 | 1 | 1 |
| <i>Phyllomyias_plumbeiceps</i>       | 1 | 1 | 1 | 1 |
| <i>Phyllomyias_sclateri</i>          | 1 | 1 | 1 | 1 |
| <i>Phyllomyias_uropygialis</i>       | 1 | 1 | 1 | 1 |
| <i>Phyllomyias_virescens</i>         | 1 | 1 | 1 | 1 |
| <i>Phylloscartes_nigrifrons</i>      | 1 | 1 | 1 | 1 |

|                                    |   |   |   |   |
|------------------------------------|---|---|---|---|
| <i>Phylloscartes_ophthalmicus</i>  | 1 | 1 | 1 | 1 |
| <i>Phylloscartes_oustaleti</i>     | 1 | 1 | 1 | 1 |
| <i>Phylloscartes_superciliaris</i> | 1 | 1 | 1 | 1 |
| <i>Phylloscartes_sylviolus</i>     | 1 | 1 | 1 | 1 |
| <i>Phylloscartes_ventralis</i>     | 1 | 1 | 1 | 1 |
| <i>Phylloscopus_affinis</i>        | 1 | 1 | 1 | 1 |
| <i>Phylloscopus_amoenus</i>        | 1 | 1 | 1 | 1 |
| <i>Phylloscopus_armandii</i>       | 1 | 1 | 1 | 1 |
| <i>Phylloscopus_bonelli</i>        | 1 | 1 | 1 | 1 |
| <i>Phylloscopus_borealis</i>       | 1 | 1 | 1 | 1 |
| <i>Phylloscopus_borealoides</i>    | 1 | 1 | 1 | 1 |
| <i>Phylloscopus_canariensis</i>    | 1 | 1 | 1 | 1 |
| <i>Phylloscopus_cantator</i>       | 1 | 1 | 1 | 1 |
| <i>Phylloscopus_cebuensis</i>      | 1 | 1 | 1 | 1 |
| <i>Phylloscopus_chloronotus</i>    | 1 | 1 | 1 | 1 |
| <i>Phylloscopus_claudiae</i>       | 1 | 1 | 1 | 1 |
| <i>Phylloscopus_collybita</i>      | 1 | 1 | 1 | 1 |
| <i>Phylloscopus_coronatus</i>      | 1 | 1 | 1 | 1 |
| <i>Phylloscopus_davisoni</i>       | 1 | 1 | 1 | 1 |
| <i>Phylloscopus_emeiensis</i>      | 1 | 1 | 1 | 1 |
| <i>Phylloscopus_forresti</i>       | 1 | 1 | 1 | 1 |
| <i>Phylloscopus_fuligiventer</i>   | 1 | 1 | 1 | 1 |
| <i>Phylloscopus_fuscatus</i>       | 1 | 1 | 1 | 1 |
| <i>Phylloscopus_goodsoni</i>       | 1 | 1 | 1 | 1 |
| <i>Phylloscopus_griseolus</i>      | 1 | 1 | 1 | 1 |
| <i>Phylloscopus_hainanus</i>       | 1 | 1 | 1 | 1 |
| <i>Phylloscopus_humei</i>          | 1 | 1 | 1 | 1 |
| <i>Phylloscopus_ijimae</i>         | 1 | 1 | 1 | 1 |
| <i>Phylloscopus_inornatus</i>      | 1 | 1 | 1 | 1 |
| <i>Phylloscopus_kansuensis</i>     | 1 | 1 | 1 | 1 |
| <i>Phylloscopus_laetus</i>         | 1 | 1 | 1 | 1 |
| <i>Phylloscopus_maculipennis</i>   | 1 | 1 | 1 | 1 |
| <i>Phylloscopus_magnirostris</i>   | 1 | 1 | 1 | 1 |
| <i>Phylloscopus_nitidus</i>        | 1 | 1 | 1 | 1 |
| <i>Phylloscopus_occipitalis</i>    | 1 | 1 | 1 | 1 |
| <i>Phylloscopus_occisinensis</i>   | 1 | 1 | 1 | 1 |
| <i>Phylloscopus_ogilviegranti</i>  | 1 | 1 | 1 | 1 |
| <i>Phylloscopus_olivaceus</i>      | 1 | 1 | 1 | 1 |
| <i>Phylloscopus_orientalis</i>     | 1 | 1 | 1 | 1 |
| <i>Phylloscopus_plumbeitarsus</i>  | 1 | 1 | 1 | 1 |
| <i>Phylloscopus_poliocephalus</i>  | 1 | 1 | 1 | 1 |
| <i>Phylloscopus_presbytes</i>      | 1 | 1 | 1 | 1 |
| <i>Phylloscopus_proregulus</i>     | 1 | 1 | 1 | 1 |
| <i>Phylloscopus_pulcher</i>        | 1 | 1 | 1 | 1 |

|                                  |   |   |   |   |
|----------------------------------|---|---|---|---|
| <i>Phylloscopus_reguloides</i>   | 1 | 1 | 1 | 1 |
| <i>Phylloscopus_ricketti</i>     | 1 | 1 | 1 | 1 |
| <i>Phylloscopus_ruficapilla</i>  | 1 | 1 | 1 | 1 |
| <i>Phylloscopus_sarasinorum</i>  | 1 | 1 | 1 | 1 |
| <i>Phylloscopus_schwarzi</i>     | 1 | 1 | 1 | 1 |
| <i>Phylloscopus_sibilatrix</i>   | 1 | 1 | 1 | 1 |
| <i>Phylloscopus_sindianus</i>    | 1 | 1 | 1 | 1 |
| <i>Phylloscopus_subaffinis</i>   | 1 | 1 | 1 | 1 |
| <i>Phylloscopus_tenellipes</i>   | 1 | 1 | 1 | 1 |
| <i>Phylloscopus_trivirgatus</i>  | 1 | 1 | 1 | 1 |
| <i>Phylloscopus_trochiloides</i> | 1 | 1 | 1 | 1 |
| <i>Phylloscopus_trochilus</i>    | 1 | 1 | 1 | 1 |
| <i>Phylloscopus_tyleri</i>       | 1 | 1 | 1 | 1 |
| <i>Phylloscopus_umbrovirens</i>  | 1 | 1 | 1 | 1 |
| <i>Phylloscopus_yunnanensis</i>  | 1 | 1 | 1 | 1 |
| <i>Phytotoma_rara</i>            | 1 | 1 | 1 | 1 |
| <i>Phytotoma_rutila</i>          | 1 | 1 | 1 | 1 |
| <i>Piaya_cayana</i>              | 1 | 1 | 1 | 1 |
| <i>Piaya_melanogaster</i>        | 1 | 1 | 1 | 1 |
| <i>Pica_hudsonia</i>             | 1 | 1 | 1 | 1 |
| <i>Pica_nuttalli</i>             | 1 | 1 | 1 | 1 |
| <i>Pica_pica</i>                 | 1 | 1 | 1 | 1 |
| <i>Picathartes_gymnocephalus</i> | 1 | 1 | 1 | 1 |
| <i>Picathartes_oreas</i>         | 1 | 1 | 1 | 1 |
| <i>Picoides_albolarvatus</i>     | 1 | 1 | 1 | 1 |
| <i>Picoides_arcticus</i>         | 1 | 1 | 1 | 1 |
| <i>Picoides_arizonae</i>         | 1 | 1 | 1 | 1 |
| <i>Picoides_borealis</i>         | 1 | 1 | 1 | 1 |
| <i>Picoides_dorsalis</i>         | 1 | 1 | 1 | 1 |
| <i>Picoides_lignarius</i>        | 1 | 1 | 1 | 1 |
| <i>Picoides_mixtus</i>           | 1 | 1 | 1 | 1 |
| <i>Picoides_nuttallii</i>        | 1 | 1 | 1 | 1 |
| <i>Picoides_pubescens</i>        | 1 | 1 | 1 | 1 |
| <i>Picoides_scalaris</i>         | 1 | 1 | 1 | 1 |
| <i>Picoides_stricklandi</i>      | 1 | 1 | 1 | 1 |
| <i>Picoides_tridactylus</i>      | 1 | 1 | 1 | 1 |
| <i>Picoides_villosus</i>         | 1 | 1 | 1 | 1 |
| <i>Piculus_auricularis</i>       | 1 | 1 | 1 | 1 |
| <i>Piculus_chrysochloros</i>     | 1 | 1 | 1 | 1 |
| <i>Piculus_flavigula</i>         | 1 | 1 | 1 | 1 |
| <i>Piculus_leucolaemus</i>       | 1 | 1 | 1 | 1 |
| <i>Piculus_rivoli</i>            | 1 | 1 | 1 | 1 |
| <i>Piculus_rubiginosus</i>       | 1 | 1 | 1 | 1 |
| <i>Picumnus_aurifrons</i>        | 1 | 1 | 1 | 1 |



|                                |   |   |   |   |
|--------------------------------|---|---|---|---|
| <i>Picumnus_cirratus</i>       | 1 | 1 | 1 | 1 |
| <i>Picumnus_exilis</i>         | 1 | 1 | 1 | 1 |
| <i>Picumnus_innominatus</i>    | 1 | 1 | 1 | 1 |
| <i>Picumnus_nebulosus</i>      | 1 | 1 | 1 | 1 |
| <i>Picumnus_rufiventris</i>    | 1 | 1 | 1 | 1 |
| <i>Picumnus_spilogaster</i>    | 1 | 1 | 1 | 1 |
| <i>Picumnus_temminckii</i>     | 1 | 1 | 1 | 1 |
| <i>Picus_awokera</i>           | 1 | 1 | 1 | 1 |
| <i>Picus_canus</i>             | 1 | 1 | 1 | 1 |
| <i>Picus_chlorolophus</i>      | 1 | 1 | 1 | 1 |
| <i>Picus_erythropygius</i>     | 1 | 1 | 1 | 1 |
| <i>Picus_flavinucha</i>        | 1 | 1 | 1 | 1 |
| <i>Picus_mentalis</i>          | 1 | 1 | 1 | 1 |
| <i>Picus_miniaceus</i>         | 1 | 1 | 1 | 1 |
| <i>Picus_puniceus</i>          | 1 | 1 | 1 | 1 |
| <i>Picus_rabieri</i>           | 1 | 1 | 1 | 1 |
| <i>Picus_vaillantii</i>        | 1 | 1 | 1 | 1 |
| <i>Picus_viridanus</i>         | 1 | 1 | 1 | 1 |
| <i>Picus_viridis</i>           | 1 | 1 | 1 | 1 |
| <i>Picus_vittatus</i>          | 1 | 1 | 1 | 1 |
| <i>Picus_xanthopygaeus</i>     | 1 | 1 | 1 | 1 |
| <i>Pinaroloxias_inornata</i>   | 1 | 1 | 1 | 1 |
| <i>Pinguinus_impennis</i>      | 1 | 1 | 1 | 1 |
| <i>Pinicola_enucleator</i>     | 1 | 1 | 1 | 1 |
| <i>Pionites_leucogaster</i>    | 1 | 1 | 1 | 1 |
| <i>Pionites_melanocephalus</i> | 1 | 1 | 1 | 1 |
| <i>Pionopsitta_barrabandi</i>  | 1 | 1 | 1 | 1 |
| <i>Pionopsitta_caica</i>       | 1 | 1 | 1 | 1 |
| <i>Pionopsitta_pileata</i>     | 1 | 1 | 1 | 1 |
| <i>Pionopsitta_vulturina</i>   | 1 | 1 | 1 | 1 |
| <i>Pionus_chalcopterus</i>     | 1 | 1 | 1 | 1 |
| <i>Pionus_cyanescens</i>       | 1 | 1 | 1 | 1 |
| <i>Pionus_fuscus</i>           | 1 | 1 | 1 | 1 |
| <i>Pionus_maximiliani</i>      | 1 | 1 | 1 | 1 |
| <i>Pionus_menstruus</i>        | 1 | 1 | 1 | 1 |
| <i>Pionus_senilis</i>          | 1 | 1 | 1 | 1 |
| <i>Pionus_sordidus</i>         | 1 | 1 | 1 | 1 |
| <i>Pionus_tumultuosus</i>      | 1 | 1 | 1 | 1 |
| <i>Pipile_cujubi</i>           | 1 | 1 | 1 | 1 |
| <i>Pipile_cumanensis</i>       | 1 | 1 | 1 | 1 |
| <i>Pipile_jacutinga</i>        | 1 | 1 | 1 | 1 |
| <i>Pipile_pipile</i>           | 1 | 1 | 1 | 1 |
| <i>Pipilo_aberti</i>           | 1 | 1 | 1 | 1 |
| <i>Pipilo_albicollis</i>       | 1 | 1 | 1 | 1 |

|                                |   |   |   |   |
|--------------------------------|---|---|---|---|
| <i>Pipilo_chlorurus</i>        | 1 | 1 | 1 | 1 |
| <i>Pipilo_crissalis</i>        | 1 | 1 | 1 | 1 |
| <i>Pipilo_erythrophthalmus</i> | 1 | 1 | 1 | 1 |
| <i>Pipilo_fuscus</i>           | 1 | 1 | 1 | 1 |
| <i>Pipilo_maculatus</i>        | 1 | 1 | 1 | 1 |
| <i>Pipilo_ocai</i>             | 1 | 1 | 1 | 1 |
| <i>Pipra_aureola</i>           | 1 | 1 | 1 | 1 |
| <i>Pipra_erythrocephala</i>    | 1 | 1 | 1 | 1 |
| <i>Pipra_fasciicauda</i>       | 1 | 1 | 1 | 1 |
| <i>Pipra_filicauda</i>         | 1 | 1 | 1 | 1 |
| <i>Pipra_mentalis</i>          | 1 | 1 | 1 | 1 |
| <i>Pipra_pipra</i>             | 1 | 1 | 1 | 1 |
| <i>Pipra_rubrocapilla</i>      | 1 | 1 | 1 | 1 |
| <i>Pipraeidea_melanonota</i>   | 1 | 1 | 1 | 1 |
| <i>Pipreola_arcuata</i>        | 1 | 1 | 1 | 1 |
| <i>Pipreola_chlorolepidota</i> | 1 | 1 | 1 | 1 |
| <i>Pipreola_frontalis</i>      | 1 | 1 | 1 | 1 |
| <i>Pipreola_intermedia</i>     | 1 | 1 | 1 | 1 |
| <i>Pipreola_pulchra</i>        | 1 | 1 | 1 | 1 |
| <i>Pipreola_whitelyi</i>       | 1 | 1 | 1 | 1 |
| <i>Piprites_chloris</i>        | 1 | 1 | 1 | 1 |
| <i>Piprites_pileata</i>        | 1 | 1 | 1 | 1 |
| <i>Piranga_bidentata</i>       | 1 | 1 | 1 | 1 |
| <i>Piranga_erythrocephala</i>  | 1 | 1 | 1 | 1 |
| <i>Piranga_flava</i>           | 1 | 1 | 1 | 1 |
| <i>Piranga_leucoptera</i>      | 1 | 1 | 1 | 1 |
| <i>Piranga_ludoviciana</i>     | 1 | 1 | 1 | 1 |
| <i>Piranga_olivacea</i>        | 1 | 1 | 1 | 1 |
| <i>Piranga_roseogularis</i>    | 1 | 1 | 1 | 1 |
| <i>Piranga_rubra</i>           | 1 | 1 | 1 | 1 |
| <i>Piranga_rubriceps</i>       | 1 | 1 | 1 | 1 |
| <i>Pitangus_sulphuratus</i>    | 1 | 1 | 1 | 1 |
| <i>Pithecophaga_jefferyi</i>   | 1 | 1 | 1 | 1 |
| <i>Pithys_albifrons</i>        | 1 | 1 | 1 | 1 |
| <i>Pithys_castaneus</i>        | 1 | 1 | 1 | 1 |
| <i>Pitohui_cristatus</i>       | 1 | 1 | 1 | 1 |
| <i>Pitohui_dichrous</i>        | 1 | 1 | 1 | 1 |
| <i>Pitohui_ferrugineus</i>     | 1 | 1 | 1 | 1 |
| <i>Pitohui_incertus</i>        | 1 | 1 | 1 | 1 |
| <i>Pitohui_kirhocephalus</i>   | 1 | 1 | 1 | 1 |
| <i>Pitohui_nigrescens</i>      | 1 | 1 | 1 | 1 |
| <i>Pitohui_tenebrosus</i>      | 1 | 1 | 1 | 1 |
| <i>Pitta_anerythra</i>         | 1 | 1 | 1 | 1 |
| <i>Pitta_angolensis</i>        | 1 | 1 | 1 | 1 |

|                                  |   |   |   |   |
|----------------------------------|---|---|---|---|
| <i>Pitta_brachyura</i>           | 1 | 1 | 1 | 1 |
| <i>Pitta_elegans</i>             | 1 | 1 | 1 | 1 |
| <i>Pitta_iris</i>                | 1 | 1 | 1 | 1 |
| <i>Pitta_kochi</i>               | 1 | 1 | 1 | 1 |
| <i>Pitta_maxima</i>              | 1 | 1 | 1 | 1 |
| <i>Pitta_moluccensis</i>         | 1 | 1 | 1 | 1 |
| <i>Pitta_nympha</i>              | 1 | 1 | 1 | 1 |
| <i>Pitta_reichenowi</i>          | 1 | 1 | 1 | 1 |
| <i>Pitta_sordida</i>             | 1 | 1 | 1 | 1 |
| <i>Pitta_steerii</i>             | 1 | 1 | 1 | 1 |
| <i>Pitta_superba</i>             | 1 | 1 | 1 | 1 |
| <i>Pitta_versicolor</i>          | 1 | 1 | 1 | 1 |
| <i>Pittasoma_michleri</i>        | 1 | 1 | 1 | 1 |
| <i>Pittasoma_rufopileatum</i>    | 1 | 1 | 1 | 1 |
| <i>Pityriasis_gymnocephala</i>   | 1 | 1 | 1 | 1 |
| <i>Platalea_ajaja</i>            | 1 | 1 | 1 | 1 |
| <i>Platalea_alba</i>             | 1 | 1 | 1 | 1 |
| <i>Platalea_leucorodia</i>       | 1 | 1 | 1 | 1 |
| <i>Platalea_minor</i>            | 1 | 1 | 1 | 1 |
| <i>Platycercus_adscitus</i>      | 1 | 1 | 1 | 1 |
| <i>Platycercus_caledonicus</i>   | 1 | 1 | 1 | 1 |
| <i>Platycercus_elegans</i>       | 1 | 1 | 1 | 1 |
| <i>Platycercus_eximius</i>       | 1 | 1 | 1 | 1 |
| <i>Platycercus_icterotis</i>     | 1 | 1 | 1 | 1 |
| <i>Platycercus_venustus</i>      | 1 | 1 | 1 | 1 |
| <i>Platycichla_flavipes</i>      | 1 | 1 | 1 | 1 |
| <i>Platycichla_leucops</i>       | 1 | 1 | 1 | 1 |
| <i>Platylophus_galericulatus</i> | 1 | 1 | 1 | 1 |
| <i>Platyrinchus_coronatus</i>    | 1 | 1 | 1 | 1 |
| <i>Platyrinchus_leucoryphus</i>  | 1 | 1 | 1 | 1 |
| <i>Platyrinchus_mystaceus</i>    | 1 | 1 | 1 | 1 |
| <i>Platyrinchus_platyrynchos</i> | 1 | 1 | 1 | 1 |
| <i>Platyrinchus_saturatus</i>    | 1 | 1 | 1 | 1 |
| <i>Platysmurus_leucopterus</i>   | 1 | 1 | 1 | 1 |
| <i>Platypiza_crassirostris</i>   | 1 | 1 | 1 | 1 |
| <i>Platysteira_albifrons</i>     | 1 | 1 | 1 | 1 |
| <i>Platysteira_cyanea</i>        | 1 | 1 | 1 | 1 |
| <i>Platysteira_laticincta</i>    | 1 | 1 | 1 | 1 |
| <i>Platysteira_peltata</i>       | 1 | 1 | 1 | 1 |
| <i>Plectorhyncha_lanceolata</i>  | 1 | 1 | 1 | 1 |
| <i>Plectrophenax_hyperboreus</i> | 1 | 1 | 1 | 1 |
| <i>Plectrophenax_nivalis</i>     | 1 | 1 | 1 | 1 |
| <i>Plegadis_chihi</i>            | 1 | 1 | 1 | 1 |
| <i>Plegadis_falcinellus</i>      | 1 | 1 | 1 | 1 |

|                               |   |   |   |   |
|-------------------------------|---|---|---|---|
| <i>Plegadis_ridgwayi</i>      | 1 | 1 | 1 | 1 |
| <i>Plocepasser_mahali</i>     | 1 | 1 | 1 | 1 |
| <i>Ploceus_benghalensis</i>   | 1 | 1 | 1 | 1 |
| <i>Ploceus_bicolor</i>        | 1 | 1 | 1 | 1 |
| <i>Ploceus_capensis</i>       | 1 | 1 | 1 | 1 |
| <i>Ploceus_cucullatus</i>     | 1 | 1 | 1 | 1 |
| <i>Ploceus_hypoxanthus</i>    | 1 | 1 | 1 | 1 |
| <i>Ploceus_intermedius</i>    | 1 | 1 | 1 | 1 |
| <i>Ploceus_luteolus</i>       | 1 | 1 | 1 | 1 |
| <i>Ploceus_manyar</i>         | 1 | 1 | 1 | 1 |
| <i>Ploceus_melanocephalus</i> | 1 | 1 | 1 | 1 |
| <i>Ploceus_ocularis</i>       | 1 | 1 | 1 | 1 |
| <i>Ploceus_philippinus</i>    | 1 | 1 | 1 | 1 |
| <i>Ploceus_taeniopterus</i>   | 1 | 1 | 1 | 1 |
| <i>Ploceus_velatus</i>        | 1 | 1 | 1 | 1 |
| <i>Pluvialis_apricaria</i>    | 1 | 1 | 1 | 1 |
| <i>Pluvialis_dominica</i>     | 1 | 1 | 1 | 1 |
| <i>Pluvialis_fulva</i>        | 1 | 1 | 1 | 1 |
| <i>Pluvialis_squatarola</i>   | 1 | 1 | 1 | 1 |
| <i>Pluvianellus_socialis</i>  | 1 | 1 | 1 | 1 |
| <i>Pluvianus_aegyptius</i>    | 1 | 1 | 1 | 1 |
| <i>Pnoepyga_albiventer</i>    | 1 | 1 | 1 | 1 |
| <i>Pnoepyga_pusilla</i>       | 1 | 1 | 1 | 1 |
| <i>Podager_nacunda</i>        | 1 | 1 | 1 | 1 |
| <i>Podargus_ocellatus</i>     | 1 | 1 | 1 | 1 |
| <i>Podargus_papuensis</i>     | 1 | 1 | 1 | 1 |
| <i>Podargus_strigoides</i>    | 1 | 1 | 1 | 1 |
| <i>Podica_senegalensis</i>    | 1 | 1 | 1 | 1 |
| <i>Podiceps_auritus</i>       | 1 | 1 | 1 | 1 |
| <i>Podiceps_cristatus</i>     | 1 | 1 | 1 | 1 |
| <i>Podiceps_gallardoi</i>     | 1 | 1 | 1 | 1 |
| <i>Podiceps_grisegena</i>     | 1 | 1 | 1 | 1 |
| <i>Podiceps_major</i>         | 1 | 1 | 1 | 1 |
| <i>Podiceps_nigricollis</i>   | 1 | 1 | 1 | 1 |
| <i>Podilymbus_podiceps</i>    | 1 | 1 | 1 | 1 |
| <i>Podoces_biddulphi</i>      | 1 | 1 | 1 | 1 |
| <i>Podoces_hendersoni</i>     | 1 | 1 | 1 | 1 |
| <i>Poecile_atricapilla</i>    | 1 | 1 | 1 | 1 |
| <i>Poecile_carolinensis</i>   | 1 | 1 | 1 | 1 |
| <i>Poecile_cinctus</i>        | 1 | 1 | 1 | 1 |
| <i>Poecile_davidi</i>         | 1 | 1 | 1 | 1 |
| <i>Poecile_gambeli</i>        | 1 | 1 | 1 | 1 |
| <i>Poecile_hudsonica</i>      | 1 | 1 | 1 | 1 |
| <i>Poecile_lugubris</i>       | 1 | 1 | 1 | 1 |

|                                    |   |   |   |   |
|------------------------------------|---|---|---|---|
| <i>Poecile_montanus</i>            | 1 | 1 | 1 | 1 |
| <i>Poecile_palustris</i>           | 1 | 1 | 1 | 1 |
| <i>Poecile_rufescens</i>           | 1 | 1 | 1 | 1 |
| <i>Poecile_sclateri</i>            | 1 | 1 | 1 | 1 |
| <i>Poecile_superciliosus</i>       | 1 | 1 | 1 | 1 |
| <i>Poecilodryas_albispecularis</i> | 1 | 1 | 1 | 1 |
| <i>Poecilodryas_cerviniventris</i> | 1 | 1 | 1 | 1 |
| <i>Poecilodryas_superciliosa</i>   | 1 | 1 | 1 | 1 |
| <i>Poecilotriccus_albifascies</i>  | 1 | 1 | 1 | 1 |
| <i>Poecilotriccus_capitalis</i>    | 1 | 1 | 1 | 1 |
| <i>Poecilotriccus_latirostris</i>  | 1 | 1 | 1 | 1 |
| <i>Poecilotriccus_plumbeiceps</i>  | 1 | 1 | 1 | 1 |
| <i>Poecilotriccus_ruficeps</i>     | 1 | 1 | 1 | 1 |
| <i>Poecilotriccus_russatus</i>     | 1 | 1 | 1 | 1 |
| <i>Poecilotriccus_sylvia</i>       | 1 | 1 | 1 | 1 |
| <i>Poeoptera_kenricki</i>          | 1 | 1 | 1 | 1 |
| <i>Poeoptera_lugubris</i>          | 1 | 1 | 1 | 1 |
| <i>Poeoptera_stuhlmanni</i>        | 1 | 1 | 1 | 1 |
| <i>Poephila_acuticauda</i>         | 1 | 1 | 1 | 1 |
| <i>Poephila_cincta</i>             | 1 | 1 | 1 | 1 |
| <i>Poephila_personata</i>          | 1 | 1 | 1 | 1 |
| <i>Pogoniulus_atroflavus</i>       | 1 | 1 | 1 | 1 |
| <i>Pogoniulus_bilineatus</i>       | 1 | 1 | 1 | 1 |
| <i>Pogoniulus_chrysoconus</i>      | 1 | 1 | 1 | 1 |
| <i>Pogoniulus_coryphaeus</i>       | 1 | 1 | 1 | 1 |
| <i>Pogoniulus_pusillus</i>         | 1 | 1 | 1 | 1 |
| <i>Pogoniulus_scolopaceus</i>      | 1 | 1 | 1 | 1 |
| <i>Pogonocichla_stellata</i>       | 1 | 1 | 1 | 1 |
| <i>Pogonotriccus_poecilotis</i>    | 1 | 1 | 1 | 1 |
| <i>Poicephalus_cryptoxanthus</i>   | 1 | 1 | 1 | 1 |
| <i>Poicephalus_guilielmi</i>       | 1 | 1 | 1 | 1 |
| <i>Poicephalus_meyeri</i>          | 1 | 1 | 1 | 1 |
| <i>Poicephalus_robustus</i>        | 1 | 1 | 1 | 1 |
| <i>Poicephalus_rufiventris</i>     | 1 | 1 | 1 | 1 |
| <i>Poicephalus_senegalus</i>       | 1 | 1 | 1 | 1 |
| <i>Polemaetus_bellicosus</i>       | 1 | 1 | 1 | 1 |
| <i>Polihierax_semitorquatus</i>    | 1 | 1 | 1 | 1 |
| <i>Poliopitila_abiloris</i>        | 1 | 1 | 1 | 1 |
| <i>Poliopitila_caerulea</i>        | 1 | 1 | 1 | 1 |
| <i>Poliopitila_californica</i>     | 1 | 1 | 1 | 1 |
| <i>Poliopitila_dumicola</i>        | 1 | 1 | 1 | 1 |
| <i>Poliopitila_melanura</i>        | 1 | 1 | 1 | 1 |
| <i>Poliopitila_nigriceps</i>       | 1 | 1 | 1 | 1 |
| <i>Poliopitila_plumbea</i>         | 1 | 1 | 1 | 1 |

|                                      |   |   |   |   |
|--------------------------------------|---|---|---|---|
| <i>Polioxolmis_rufipennis</i>        | 1 | 1 | 1 | 1 |
| <i>Polyboroides_typus</i>            | 1 | 1 | 1 | 1 |
| <i>Polyonymus_caroli</i>             | 1 | 1 | 1 | 1 |
| <i>Polyplectron_bicalcaratum</i>     | 1 | 1 | 1 | 1 |
| <i>Polyplectron_chalcurum</i>        | 1 | 1 | 1 | 1 |
| <i>Polyplectron_germaini</i>         | 1 | 1 | 1 | 1 |
| <i>Polyplectron_inopinatum</i>       | 1 | 1 | 1 | 1 |
| <i>Polyplectron_katsumatae</i>       | 1 | 1 | 1 | 1 |
| <i>Polyplectron_malacense</i>        | 1 | 1 | 1 | 1 |
| <i>Polyplectron_napoleonis</i>       | 1 | 1 | 1 | 1 |
| <i>Polyplectron_schleiermachersi</i> | 1 | 1 | 1 | 1 |
| <i>Polysticta_stelleri</i>           | 1 | 1 | 1 | 1 |
| <i>Polystictus_pectoralis</i>        | 1 | 1 | 1 | 1 |
| <i>Polystictus_superciliaris</i>     | 1 | 1 | 1 | 1 |
| <i>Polytelis_alexandrae</i>          | 1 | 1 | 1 | 1 |
| <i>Polytelis_anthopeplus</i>         | 1 | 1 | 1 | 1 |
| <i>Polytmus_guainumbi</i>            | 1 | 1 | 1 | 1 |
| <i>Polytmus_theresiae</i>            | 1 | 1 | 1 | 1 |
| <i>Pomarea_dimidiata</i>             | 1 | 1 | 1 | 1 |
| <i>Pomarea_iphis</i>                 | 1 | 1 | 1 | 1 |
| <i>Pomarea_mendozae</i>              | 1 | 1 | 1 | 1 |
| <i>Pomarea_nigra</i>                 | 1 | 1 | 1 | 1 |
| <i>Pomarea_whitneyi</i>              | 1 | 1 | 1 | 1 |
| <i>Pomatorhinus_erythrocnemis</i>    | 1 | 1 | 1 | 1 |
| <i>Pomatorhinus_erythrognys</i>      | 1 | 1 | 1 | 1 |
| <i>Pomatorhinus_ferruginosus</i>     | 1 | 1 | 1 | 1 |
| <i>Pomatorhinus_horsfieldii</i>      | 1 | 1 | 1 | 1 |
| <i>Pomatorhinus_hypoleucos</i>       | 1 | 1 | 1 | 1 |
| <i>Pomatorhinus_montanus</i>         | 1 | 1 | 1 | 1 |
| <i>Pomatorhinus_musicus</i>          | 1 | 1 | 1 | 1 |
| <i>Pomatorhinus_ochraceiceps</i>     | 1 | 1 | 1 | 1 |
| <i>Pomatorhinus_ruficollis</i>       | 1 | 1 | 1 | 1 |
| <i>Pomatorhinus_schisticeps</i>      | 1 | 1 | 1 | 1 |
| <i>Pomatorhinus_swinhoei</i>         | 1 | 1 | 1 | 1 |
| <i>Pomatostomus_halli</i>            | 1 | 1 | 1 | 1 |
| <i>Pomatostomus_isidorei</i>         | 1 | 1 | 1 | 1 |
| <i>Pomatostomus_ruficeps</i>         | 1 | 1 | 1 | 1 |
| <i>Pomatostomus_superciliosus</i>    | 1 | 1 | 1 | 1 |
| <i>Pomatostomus_temporalis</i>       | 1 | 1 | 1 | 1 |
| <i>Poecetes_gramineus</i>            | 1 | 1 | 1 | 1 |
| <i>Poospiza_alticola</i>             | 1 | 1 | 1 | 1 |
| <i>Poospiza_baeri</i>                | 1 | 1 | 1 | 1 |
| <i>Poospiza_boliviana</i>            | 1 | 1 | 1 | 1 |
| <i>Poospiza_caesar</i>               | 1 | 1 | 1 | 1 |

|                                    |   |   |   |   |
|------------------------------------|---|---|---|---|
| <i>Poospiza_cinerea</i>            | 1 | 1 | 1 | 1 |
| <i>Poospiza_erythrophrys</i>       | 1 | 1 | 1 | 1 |
| <i>Poospiza_garleppi</i>           | 1 | 1 | 1 | 1 |
| <i>Poospiza_hispaniolensis</i>     | 1 | 1 | 1 | 1 |
| <i>Poospiza_hypochondria</i>       | 1 | 1 | 1 | 1 |
| <i>Poospiza_lateralis</i>          | 1 | 1 | 1 | 1 |
| <i>Poospiza_melanoleuca</i>        | 1 | 1 | 1 | 1 |
| <i>Poospiza_ornata</i>             | 1 | 1 | 1 | 1 |
| <i>Poospiza_torquata</i>           | 1 | 1 | 1 | 1 |
| <i>Poospiza_whitii</i>             | 1 | 1 | 1 | 1 |
| <i>Porphyrio_flavirostris</i>      | 1 | 1 | 1 | 1 |
| <i>Porphyrio_hochstetteri</i>      | 1 | 1 | 1 | 1 |
| <i>Porphyrio_martinica</i>         | 1 | 1 | 1 | 1 |
| <i>Porphyrio_porphyrio</i>         | 1 | 1 | 1 | 1 |
| <i>Porphyrolaema_porphyrolaema</i> | 1 | 1 | 1 | 1 |
| <i>Porphyrospiza_caerulescens</i>  | 1 | 1 | 1 | 1 |
| <i>Porzana_carolina</i>            | 1 | 1 | 1 | 1 |
| <i>Porzana_porzana</i>             | 1 | 1 | 1 | 1 |
| <i>Porzana_pusilla</i>             | 1 | 1 | 1 | 1 |
| <i>Porzana_tabuensis</i>           | 1 | 1 | 1 | 1 |
| <i>Premnoplex_brunnescens</i>      | 1 | 1 | 1 | 1 |
| <i>Premnoplex_tatei</i>            | 1 | 1 | 1 | 1 |
| <i>Premnornis_guttuligera</i>      | 1 | 1 | 1 | 1 |
| <i>Primolius_auricollis</i>        | 1 | 1 | 1 | 1 |
| <i>Primolius_couloni</i>           | 1 | 1 | 1 | 1 |
| <i>Primolius_maracana</i>          | 1 | 1 | 1 | 1 |
| <i>Prinia_atrogularis</i>          | 1 | 1 | 1 | 1 |
| <i>Prinia_bairdii</i>              | 1 | 1 | 1 | 1 |
| <i>Prinia_crinigera</i>            | 1 | 1 | 1 | 1 |
| <i>Prinia_familiaris</i>           | 1 | 1 | 1 | 1 |
| <i>Prinia_subflava</i>             | 1 | 1 | 1 | 1 |
| <i>Prioniturus_luconensis</i>      | 1 | 1 | 1 | 1 |
| <i>Prionochilus_maculatus</i>      | 1 | 1 | 1 | 1 |
| <i>Prionochilus_olivaceus</i>      | 1 | 1 | 1 | 1 |
| <i>Prionochilus_percussus</i>      | 1 | 1 | 1 | 1 |
| <i>Prionochilus_plateni</i>        | 1 | 1 | 1 | 1 |
| <i>Prionochilus_thoracicus</i>     | 1 | 1 | 1 | 1 |
| <i>Prionochilus_xanthopygius</i>   | 1 | 1 | 1 | 1 |
| <i>Prionodura_newtoniana</i>       | 1 | 1 | 1 | 1 |
| <i>Prionops_plumatus</i>           | 1 | 1 | 1 | 1 |
| <i>Prionops_retzii</i>             | 1 | 1 | 1 | 1 |
| <i>Prionops_scopifrons</i>         | 1 | 1 | 1 | 1 |
| <i>Priotelus_roseigaster</i>       | 1 | 1 | 1 | 1 |
| <i>Priotelus_temnurus</i>          | 1 | 1 | 1 | 1 |

|                                     |   |   |   |   |
|-------------------------------------|---|---|---|---|
| <i>Probosciger_aterimus</i>         | 1 | 1 | 1 | 1 |
| <i>Procellaria_aequinoctialis</i>   | 1 | 1 | 1 | 1 |
| <i>Procellaria_cinerea</i>          | 1 | 1 | 1 | 1 |
| <i>Procellaria_parkinsoni</i>       | 1 | 1 | 1 | 1 |
| <i>Procellaria_westlandica</i>      | 1 | 1 | 1 | 1 |
| <i>Procnias_albus</i>               | 1 | 1 | 1 | 1 |
| <i>Procnias_nudicollis</i>          | 1 | 1 | 1 | 1 |
| <i>Progne_chalybea</i>              | 1 | 1 | 1 | 1 |
| <i>Progne_cryptoleuca</i>           | 1 | 1 | 1 | 1 |
| <i>Progne_dominicensis</i>          | 1 | 1 | 1 | 1 |
| <i>Progne_elegans</i>               | 1 | 1 | 1 | 1 |
| <i>Progne_modesta</i>               | 1 | 1 | 1 | 1 |
| <i>Progne_murphyi</i>               | 1 | 1 | 1 | 1 |
| <i>Progne_sinaloae</i>              | 1 | 1 | 1 | 1 |
| <i>Progne_subis</i>                 | 1 | 1 | 1 | 1 |
| <i>Progne_tapera</i>                | 1 | 1 | 1 | 1 |
| <i>Promerops_cafer</i>              | 1 | 1 | 1 | 1 |
| <i>Promerops_gurneyi</i>            | 1 | 1 | 1 | 1 |
| <i>Prosopiea_tabuensis</i>          | 1 | 1 | 1 | 1 |
| <i>Prothemadera_novaeseelandiae</i> | 1 | 1 | 1 | 1 |
| <i>Protonotaria_citrea</i>          | 1 | 1 | 1 | 1 |
| <i>Prunella_atrogularis</i>         | 1 | 1 | 1 | 1 |
| <i>Prunella_collaris</i>            | 1 | 1 | 1 | 1 |
| <i>Prunella_fulvescens</i>          | 1 | 1 | 1 | 1 |
| <i>Prunella_himalayana</i>          | 1 | 1 | 1 | 1 |
| <i>Prunella_modularis</i>           | 1 | 1 | 1 | 1 |
| <i>Prunella_montanella</i>          | 1 | 1 | 1 | 1 |
| <i>Prunella_rubida</i>              | 1 | 1 | 1 | 1 |
| <i>Psolidoprocne_albiceps</i>       | 1 | 1 | 1 | 1 |
| <i>Psolidoprocne_fuliginosa</i>     | 1 | 1 | 1 | 1 |
| <i>Psolidoprocne_holomelas</i>      | 1 | 1 | 1 | 1 |
| <i>Psolidoprocne_nitens</i>         | 1 | 1 | 1 | 1 |
| <i>Psolidoprocne_obscura</i>        | 1 | 1 | 1 | 1 |
| <i>Psaltriparus_minimus</i>         | 1 | 1 | 1 | 1 |
| <i>Psarisomus_dalhousiae</i>        | 1 | 1 | 1 | 1 |
| <i>Psarocolius_angustifrons</i>     | 1 | 1 | 1 | 1 |
| <i>Psarocolius_atrovirens</i>       | 1 | 1 | 1 | 1 |
| <i>Psarocolius_bifasciatus</i>      | 1 | 1 | 1 | 1 |
| <i>Psarocolius_decumanus</i>        | 1 | 1 | 1 | 1 |
| <i>Psarocolius_montezuma</i>        | 1 | 1 | 1 | 1 |
| <i>Psarocolius_oseryi</i>           | 1 | 1 | 1 | 1 |
| <i>Psarocolius_viridis</i>          | 1 | 1 | 1 | 1 |
| <i>Psarocolius_wagleri</i>          | 1 | 1 | 1 | 1 |
| <i>Pselliophorus_luteoviridis</i>   | 1 | 1 | 1 | 1 |



|                                      |   |   |   |   |
|--------------------------------------|---|---|---|---|
| <i>Pselliophorus tibialis</i>        | 1 | 1 | 1 | 1 |
| <i>Psephotus dissimilis</i>          | 1 | 1 | 1 | 1 |
| <i>Psephotus haematonotus</i>        | 1 | 1 | 1 | 1 |
| <i>Psephotus varius</i>              | 1 | 1 | 1 | 1 |
| <i>Pseudelaenia leucospodia</i>      | 1 | 1 | 1 | 1 |
| <i>Pseudeos fuscata</i>              | 1 | 1 | 1 | 1 |
| <i>Pseudhirundo griseopyga</i>       | 1 | 1 | 1 | 1 |
| <i>Pseudoalcippe abyssinica</i>      | 1 | 1 | 1 | 1 |
| <i>Pseudobias wardi</i>              | 1 | 1 | 1 | 1 |
| <i>Pseudobulweria aterrima</i>       | 1 | 1 | 1 | 1 |
| <i>Pseudobulweria rostrata</i>       | 1 | 1 | 1 | 1 |
| <i>Pseudocalyptomena graueri</i>     | 1 | 1 | 1 | 1 |
| <i>Pseudochelidon eurystomina</i>    | 1 | 1 | 1 | 1 |
| <i>Pseudochelidon sirintarae</i>     | 1 | 1 | 1 | 1 |
| <i>Pseudocolaptes boissonneautii</i> | 1 | 1 | 1 | 1 |
| <i>Pseudocolaptes lawrencii</i>      | 1 | 1 | 1 | 1 |
| <i>Pseudocolopteryx acutipennis</i>  | 1 | 1 | 1 | 1 |
| <i>Pseudocolopteryx flaviventris</i> | 1 | 1 | 1 | 1 |
| <i>Pseudocolopteryx sclateri</i>     | 1 | 1 | 1 | 1 |
| <i>Pseudoleistes guirahuro</i>       | 1 | 1 | 1 | 1 |
| <i>Pseudoleistes virescens</i>       | 1 | 1 | 1 | 1 |
| <i>Pseudonestor xanthophrys</i>      | 1 | 1 | 1 | 1 |
| <i>Pseudopodoces humilis</i>         | 1 | 1 | 1 | 1 |
| <i>Pseudoscops clamator</i>          | 1 | 1 | 1 | 1 |
| <i>Pseudoseisura lophotes</i>        | 1 | 1 | 1 | 1 |
| <i>Pseudotriccus ruficeps</i>        | 1 | 1 | 1 | 1 |
| <i>Pseudotriccus simplex</i>         | 1 | 1 | 1 | 1 |
| <i>Psilopogon pyrolophus</i>         | 1 | 1 | 1 | 1 |
| <i>Psilopsiagon aurifrons</i>        | 1 | 1 | 1 | 1 |
| <i>Psilorhamphus guttatus</i>        | 1 | 1 | 1 | 1 |
| <i>Psittacella brehmii</i>           | 1 | 1 | 1 | 1 |
| <i>Psittacula alexandri</i>          | 1 | 1 | 1 | 1 |
| <i>Psittacula calthorpae</i>         | 1 | 1 | 1 | 1 |
| <i>Psittacula columboides</i>        | 1 | 1 | 1 | 1 |
| <i>Psittacula cyanocephala</i>       | 1 | 1 | 1 | 1 |
| <i>Psittacula derbiana</i>           | 1 | 1 | 1 | 1 |
| <i>Psittacula echo</i>               | 1 | 1 | 1 | 1 |
| <i>Psittacula eupatria</i>           | 1 | 1 | 1 | 1 |
| <i>Psittacula finschii</i>           | 1 | 1 | 1 | 1 |
| <i>Psittacula himalayana</i>         | 1 | 1 | 1 | 1 |
| <i>Psittacula krameri</i>            | 1 | 1 | 1 | 1 |
| <i>Psittacula longicauda</i>         | 1 | 1 | 1 | 1 |
| <i>Psittacula roseata</i>            | 1 | 1 | 1 | 1 |
| <i>Psittacula wardi</i>              | 1 | 1 | 1 | 1 |

|                                      |   |   |   |   |
|--------------------------------------|---|---|---|---|
| <i>Psittaculirostris_desmarestii</i> | 1 | 1 | 1 | 1 |
| <i>Psittaculirostris_edwardsii</i>   | 1 | 1 | 1 | 1 |
| <i>Psittacus_erithacus</i>           | 1 | 1 | 1 | 1 |
| <i>Psitteuteles_goldiei</i>          | 1 | 1 | 1 | 1 |
| <i>Psittinus_cyanurus</i>            | 1 | 1 | 1 | 1 |
| <i>Psittrichas_fulgidus</i>          | 1 | 1 | 1 | 1 |
| <i>Psophia_crepitans</i>             | 1 | 1 | 1 | 1 |
| <i>Psophia_leucoptera</i>            | 1 | 1 | 1 | 1 |
| <i>Psophia_viridis</i>               | 1 | 1 | 1 | 1 |
| <i>Psophocichla_litsitsirupa</i>     | 1 | 1 | 1 | 1 |
| <i>Psophodes_olivaceus</i>           | 1 | 1 | 1 | 1 |
| <i>Pteridophora_alberti</i>          | 1 | 1 | 1 | 1 |
| <i>Pterocles_bicinctus</i>           | 1 | 1 | 1 | 1 |
| <i>Pterocles_coronatus</i>           | 1 | 1 | 1 | 1 |
| <i>Pterocles_gutturalis</i>          | 1 | 1 | 1 | 1 |
| <i>Pterocles_namaqua</i>             | 1 | 1 | 1 | 1 |
| <i>Pterocles_orientalis</i>          | 1 | 1 | 1 | 1 |
| <i>Pterocnemia_pennata</i>           | 1 | 1 | 1 | 1 |
| <i>Pterodroma_alba</i>               | 1 | 1 | 1 | 1 |
| <i>Pterodroma_arminjoniana</i>       | 1 | 1 | 1 | 1 |
| <i>Pterodroma_axillaris</i>          | 1 | 1 | 1 | 1 |
| <i>Pterodroma_barau</i>              | 1 | 1 | 1 | 1 |
| <i>Pterodroma_cahow</i>              | 1 | 1 | 1 | 1 |
| <i>Pterodroma_cervicalis</i>         | 1 | 1 | 1 | 1 |
| <i>Pterodroma_cookii</i>             | 1 | 1 | 1 | 1 |
| <i>Pterodroma_externa</i>            | 1 | 1 | 1 | 1 |
| <i>Pterodroma_feae</i>               | 1 | 1 | 1 | 1 |
| <i>Pterodroma_hasitata</i>           | 1 | 1 | 1 | 1 |
| <i>Pterodroma_heraldica</i>          | 1 | 1 | 1 | 1 |
| <i>Pterodroma_hypoleuca</i>          | 1 | 1 | 1 | 1 |
| <i>Pterodroma_incerta</i>            | 1 | 1 | 1 | 1 |
| <i>Pterodroma_inexpectata</i>        | 1 | 1 | 1 | 1 |
| <i>Pterodroma_lessonii</i>           | 1 | 1 | 1 | 1 |
| <i>Pterodroma_longirostris</i>       | 1 | 1 | 1 | 1 |
| <i>Pterodroma_macroptera</i>         | 1 | 1 | 1 | 1 |
| <i>Pterodroma_madeira</i>            | 1 | 1 | 1 | 1 |
| <i>Pterodroma_magentae</i>           | 1 | 1 | 1 | 1 |
| <i>Pterodroma_mollis</i>             | 1 | 1 | 1 | 1 |
| <i>Pterodroma_neglecta</i>           | 1 | 1 | 1 | 1 |
| <i>Pterodroma_nigripennis</i>        | 1 | 1 | 1 | 1 |
| <i>Pterodroma_phaeopygia</i>         | 1 | 1 | 1 | 1 |
| <i>Pterodroma_sandwichensis</i>      | 1 | 1 | 1 | 1 |
| <i>Pterodroma_solandri</i>           | 1 | 1 | 1 | 1 |
| <i>Pteroglossus_aracari</i>          | 1 | 1 | 1 | 1 |

|                                   |   |   |   |   |
|-----------------------------------|---|---|---|---|
| <i>Pteroglossus_azara</i>         | 1 | 1 | 1 | 1 |
| <i>Pteroglossus_bailloni</i>      | 1 | 1 | 1 | 1 |
| <i>Pteroglossus_beaharnaesii</i>  | 1 | 1 | 1 | 1 |
| <i>Pteroglossus_bitorquatus</i>   | 1 | 1 | 1 | 1 |
| <i>Pteroglossus_castanotis</i>    | 1 | 1 | 1 | 1 |
| <i>Pteroglossus_erythropygius</i> | 1 | 1 | 1 | 1 |
| <i>Pteroglossus_frantzii</i>      | 1 | 1 | 1 | 1 |
| <i>Pteroglossus_inscriptus</i>    | 1 | 1 | 1 | 1 |
| <i>Pteroglossus_mariae</i>        | 1 | 1 | 1 | 1 |
| <i>Pteroglossus_pluricinctus</i>  | 1 | 1 | 1 | 1 |
| <i>Pteroglossus_sanguineus</i>    | 1 | 1 | 1 | 1 |
| <i>Pteroglossus_torquatus</i>     | 1 | 1 | 1 | 1 |
| <i>Pteroglossus_viridis</i>       | 1 | 1 | 1 | 1 |
| <i>Pteronetta_hartlaubi</i>       | 1 | 1 | 1 | 1 |
| <i>Pterophanes_cyanopterus</i>    | 1 | 1 | 1 | 1 |
| <i>Pteroptochos_castaneus</i>     | 1 | 1 | 1 | 1 |
| <i>Pteroptochos_megapodius</i>    | 1 | 1 | 1 | 1 |
| <i>Pteroptochos_tarnii</i>        | 1 | 1 | 1 | 1 |
| <i>Pteruthius_aenobarbus</i>      | 1 | 1 | 1 | 1 |
| <i>Pteruthius_flaviscapis</i>     | 1 | 1 | 1 | 1 |
| <i>Pteruthius_melanotis</i>       | 1 | 1 | 1 | 1 |
| <i>Pteruthius_rufiventer</i>      | 1 | 1 | 1 | 1 |
| <i>Pteruthius_xanthochlorus</i>   | 1 | 1 | 1 | 1 |
| <i>Ptilinopus_leclancheri</i>     | 1 | 1 | 1 | 1 |
| <i>Ptilinopus_luteovirens</i>     | 1 | 1 | 1 | 1 |
| <i>Ptilinopus_magnificus</i>      | 1 | 1 | 1 | 1 |
| <i>Ptilinopus_melanospil</i>      | 1 | 1 | 1 | 1 |
| <i>Ptilinopus_occipitalis</i>     | 1 | 1 | 1 | 1 |
| <i>Ptilinopus_pulchellus</i>      | 1 | 1 | 1 | 1 |
| <i>Ptilinopus_rarotongensis</i>   | 1 | 1 | 1 | 1 |
| <i>Ptilinopus_regina</i>          | 1 | 1 | 1 | 1 |
| <i>Ptilinopus_richardsii</i>      | 1 | 1 | 1 | 1 |
| <i>Ptilinopus_rivoli</i>          | 1 | 1 | 1 | 1 |
| <i>Ptilinopus_solomonensis</i>    | 1 | 1 | 1 | 1 |
| <i>Ptilinopus_superbus</i>        | 1 | 1 | 1 | 1 |
| <i>Ptilinopus_victor</i>          | 1 | 1 | 1 | 1 |
| <i>Ptilocichla_falcata</i>        | 1 | 1 | 1 | 1 |
| <i>Ptilocichla_leucogrammica</i>  | 1 | 1 | 1 | 1 |
| <i>Ptilocichla_mindanensis</i>    | 1 | 1 | 1 | 1 |
| <i>Ptilogonys_caudatus</i>        | 1 | 1 | 1 | 1 |
| <i>Ptilogonys_cinereus</i>        | 1 | 1 | 1 | 1 |
| <i>Ptilonorhynchus_violaceus</i>  | 1 | 1 | 1 | 1 |
| <i>Ptilopachus_petrosus</i>       | 1 | 1 | 1 | 1 |
| <i>Ptiloprora_guisei</i>          | 1 | 1 | 1 | 1 |

|                                    |   |   |   |   |
|------------------------------------|---|---|---|---|
| <i>Ptiloprora plumbea</i>          | 1 | 1 | 1 | 1 |
| <i>Ptilopsis granti</i>            | 1 | 1 | 1 | 1 |
| <i>Ptilopsis leucotis</i>          | 1 | 1 | 1 | 1 |
| <i>Ptiloris intercedens</i>        | 1 | 1 | 1 | 1 |
| <i>Ptiloris magnificus</i>         | 1 | 1 | 1 | 1 |
| <i>Ptiloris paradiseus</i>         | 1 | 1 | 1 | 1 |
| <i>Ptiloris victoriae</i>          | 1 | 1 | 1 | 1 |
| <i>Ptilorrhoa caerulescens</i>     | 1 | 1 | 1 | 1 |
| <i>Ptilorrhoa leucosticta</i>      | 1 | 1 | 1 | 1 |
| <i>Ptilostomus afer</i>            | 1 | 1 | 1 | 1 |
| <i>Ptychoramphus aleuticus</i>     | 1 | 1 | 1 | 1 |
| <i>Ptyonoprogne concolor</i>       | 1 | 1 | 1 | 1 |
| <i>Ptyonoprogne fuligula</i>       | 1 | 1 | 1 | 1 |
| <i>Ptyonoprogne rupestris</i>      | 1 | 1 | 1 | 1 |
| <i>Ptyrticus turdinus</i>          | 1 | 1 | 1 | 1 |
| <i>Pucrasia macrolopha</i>         | 1 | 1 | 1 | 1 |
| <i>Puffinus assimilis</i>          | 1 | 1 | 1 | 1 |
| <i>Puffinus bulleri</i>            | 1 | 1 | 1 | 1 |
| <i>Puffinus carneipes</i>          | 1 | 1 | 1 | 1 |
| <i>Puffinus creatopus</i>          | 1 | 1 | 1 | 1 |
| <i>Puffinus gavia</i>              | 1 | 1 | 1 | 1 |
| <i>Puffinus gravis</i>             | 1 | 1 | 1 | 1 |
| <i>Puffinus griseus</i>            | 1 | 1 | 1 | 1 |
| <i>Puffinus huttoni</i>            | 1 | 1 | 1 | 1 |
| <i>Puffinus lherminieri</i>        | 1 | 1 | 1 | 1 |
| <i>Puffinus mauretanicus</i>       | 1 | 1 | 1 | 1 |
| <i>Puffinus nativitatis</i>        | 1 | 1 | 1 | 1 |
| <i>Puffinus newelli</i>            | 1 | 1 | 1 | 1 |
| <i>Puffinus opisthomelas</i>       | 1 | 1 | 1 | 1 |
| <i>Puffinus pacificus</i>          | 1 | 1 | 1 | 1 |
| <i>Puffinus puffinus</i>           | 1 | 1 | 1 | 1 |
| <i>Puffinus tenuirostris</i>       | 1 | 1 | 1 | 1 |
| <i>Puffinus yelkouan</i>           | 1 | 1 | 1 | 1 |
| <i>Pulsatrix koeniswaldiana</i>    | 1 | 1 | 1 | 1 |
| <i>Pulsatrix perspicillata</i>     | 1 | 1 | 1 | 1 |
| <i>Purpureicephalus spurius</i>    | 1 | 1 | 1 | 1 |
| <i>Pycnonotus atriceps</i>         | 1 | 1 | 1 | 1 |
| <i>Pycnonotus barbatus</i>         | 1 | 1 | 1 | 1 |
| <i>Pycnonotus brunneus</i>         | 1 | 1 | 1 | 1 |
| <i>Pycnonotus capensis</i>         | 1 | 1 | 1 | 1 |
| <i>Pycnonotus cyaniventris</i>     | 1 | 1 | 1 | 1 |
| <i>Pycnonotus erythrophthalmos</i> | 1 | 1 | 1 | 1 |
| <i>Pycnonotus eutilotus</i>        | 1 | 1 | 1 | 1 |
| <i>Pycnonotus finlaysoni</i>       | 1 | 1 | 1 | 1 |

|                                   |   |   |   |   |
|-----------------------------------|---|---|---|---|
| <i>Pycnonotus flavescens</i>      | 1 | 1 | 1 | 1 |
| <i>Pycnonotus goiavier</i>        | 1 | 1 | 1 | 1 |
| <i>Pycnonotus jocosus</i>         | 1 | 1 | 1 | 1 |
| <i>Pycnonotus leucogenys</i>      | 1 | 1 | 1 | 1 |
| <i>Pycnonotus melanicterus</i>    | 1 | 1 | 1 | 1 |
| <i>Pycnonotus melanoleucos</i>    | 1 | 1 | 1 | 1 |
| <i>Pycnonotus nigricans</i>       | 1 | 1 | 1 | 1 |
| <i>Pycnonotus plumosus</i>        | 1 | 1 | 1 | 1 |
| <i>Pycnonotus simplex</i>         | 1 | 1 | 1 | 1 |
| <i>Pycnonotus sinensis</i>        | 1 | 1 | 1 | 1 |
| <i>Pycnonotus squamatus</i>       | 1 | 1 | 1 | 1 |
| <i>Pycnonotus taivanus</i>        | 1 | 1 | 1 | 1 |
| <i>Pycnonotus urostictus</i>      | 1 | 1 | 1 | 1 |
| <i>Pycnonotus xanthorrhous</i>    | 1 | 1 | 1 | 1 |
| <i>Pycnonotus zeylanicus</i>      | 1 | 1 | 1 | 1 |
| <i>Pycnoptilus floccosus</i>      | 1 | 1 | 1 | 1 |
| <i>Pycnopygius cinereus</i>       | 1 | 1 | 1 | 1 |
| <i>Pycnopygius stictocephalus</i> | 1 | 1 | 1 | 1 |
| <i>Pygarrhichas albogularis</i>   | 1 | 1 | 1 | 1 |
| <i>Pygiptila stellaris</i>        | 1 | 1 | 1 | 1 |
| <i>Pygochelidon cyanoleuca</i>    | 1 | 1 | 1 | 1 |
| <i>Pygoscelis adeliae</i>         | 1 | 1 | 1 | 1 |
| <i>Pygoscelis antarcticus</i>     | 1 | 1 | 1 | 1 |
| <i>Pygoscelis papua</i>           | 1 | 1 | 1 | 1 |
| <i>Pyrenestes sanguineus</i>      | 1 | 1 | 1 | 1 |
| <i>Pyrgilauda blanfordi</i>       | 1 | 1 | 1 | 1 |
| <i>Pyriglena leuconota</i>        | 1 | 1 | 1 | 1 |
| <i>Pyriglena leucoptera</i>       | 1 | 1 | 1 | 1 |
| <i>Pyrocephalus rubinus</i>       | 1 | 1 | 1 | 1 |
| <i>Pyroderus scutatus</i>         | 1 | 1 | 1 | 1 |
| <i>Pyrrhocomma ruficeps</i>       | 1 | 1 | 1 | 1 |
| <i>Pyrrhocolax graculus</i>       | 1 | 1 | 1 | 1 |
| <i>Pyrrhocolax pyrrhocolax</i>    | 1 | 1 | 1 | 1 |
| <i>Pyrrholaemus brunneus</i>      | 1 | 1 | 1 | 1 |
| <i>Pyrrholaemus sagittatus</i>    | 1 | 1 | 1 | 1 |
| <i>Pyrrhomyias cinnamomeus</i>    | 1 | 1 | 1 | 1 |
| <i>Pyrrhoplectes epauletta</i>    | 1 | 1 | 1 | 1 |
| <i>Pyrrhula aurantiaca</i>        | 1 | 1 | 1 | 1 |
| <i>Pyrrhula erythaca</i>          | 1 | 1 | 1 | 1 |
| <i>Pyrrhula erythrocephala</i>    | 1 | 1 | 1 | 1 |
| <i>Pyrrhula murina</i>            | 1 | 1 | 1 | 1 |
| <i>Pyrrhula nipalensis</i>        | 1 | 1 | 1 | 1 |
| <i>Pyrrhula pyrrhula</i>          | 1 | 1 | 1 | 1 |
| <i>Pyrrhura albipectus</i>        | 1 | 1 | 1 | 1 |

|                                |   |   |   |   |
|--------------------------------|---|---|---|---|
| <i>Pyrrhura_cruentata</i>      | 1 | 1 | 1 | 1 |
| <i>Pyrrhura_frontalis</i>      | 1 | 1 | 1 | 1 |
| <i>Pyrrhura_griseipectus</i>   | 1 | 1 | 1 | 1 |
| <i>Pyrrhura_hoffmanni</i>      | 1 | 1 | 1 | 1 |
| <i>Pyrrhura_lepida</i>         | 1 | 1 | 1 | 1 |
| <i>Pyrrhura_leucotis</i>       | 1 | 1 | 1 | 1 |
| <i>Pyrrhura_melanura</i>       | 1 | 1 | 1 | 1 |
| <i>Pyrrhura_molinae</i>        | 1 | 1 | 1 | 1 |
| <i>Pyrrhura_orcesi</i>         | 1 | 1 | 1 | 1 |
| <i>Pyrrhura_perlata</i>        | 1 | 1 | 1 | 1 |
| <i>Pyrrhura_pfrimeri</i>       | 1 | 1 | 1 | 1 |
| <i>Pyrrhura_picta</i>          | 1 | 1 | 1 | 1 |
| <i>Pyrrhura_rhodocephala</i>   | 1 | 1 | 1 | 1 |
| <i>Pyrrhura_rupicola</i>       | 1 | 1 | 1 | 1 |
| <i>Pyrrhurus_scandens</i>      | 1 | 1 | 1 | 1 |
| <i>Pytilia_afra</i>            | 1 | 1 | 1 | 1 |
| <i>Pytilia_hypogrammica</i>    | 1 | 1 | 1 | 1 |
| <i>Pytilia_lineata</i>         | 1 | 1 | 1 | 1 |
| <i>Pytilia_melba</i>           | 1 | 1 | 1 | 1 |
| <i>Pytilia_phoenicoptera</i>   | 1 | 1 | 1 | 1 |
| <i>Quelea_cardinalis</i>       | 1 | 1 | 1 | 1 |
| <i>Quelea_quelea</i>           | 1 | 1 | 1 | 1 |
| <i>Querula_purpurata</i>       | 1 | 1 | 1 | 1 |
| <i>Quiscalus_lugubris</i>      | 1 | 1 | 1 | 1 |
| <i>Quiscalus_major</i>         | 1 | 1 | 1 | 1 |
| <i>Quiscalus_mexicanus</i>     | 1 | 1 | 1 | 1 |
| <i>Quiscalus_nicaraguensis</i> | 1 | 1 | 1 | 1 |
| <i>Quiscalus_niger</i>         | 1 | 1 | 1 | 1 |
| <i>Quiscalus_quiscula</i>      | 1 | 1 | 1 | 1 |
| <i>Rallina_eurizonoides</i>    | 1 | 1 | 1 | 1 |
| <i>Rallus_aquaticus</i>        | 1 | 1 | 1 | 1 |
| <i>Rallus_elegans</i>          | 1 | 1 | 1 | 1 |
| <i>Rallus_limicola</i>         | 1 | 1 | 1 | 1 |
| <i>Rallus_longirostris</i>     | 1 | 1 | 1 | 1 |
| <i>Ramphastos_ambiguus</i>     | 1 | 1 | 1 | 1 |
| <i>Ramphastos_ariel</i>        | 1 | 1 | 1 | 1 |
| <i>Ramphastos_brevis</i>       | 1 | 1 | 1 | 1 |
| <i>Ramphastos_culminatus</i>   | 1 | 1 | 1 | 1 |
| <i>Ramphastos_cuvieri</i>      | 1 | 1 | 1 | 1 |
| <i>Ramphastos_dicolorus</i>    | 1 | 1 | 1 | 1 |
| <i>Ramphastos_sulfuratus</i>   | 1 | 1 | 1 | 1 |
| <i>Ramphastos_swainsonii</i>   | 1 | 1 | 1 | 1 |
| <i>Ramphastos_toco</i>         | 1 | 1 | 1 | 1 |
| <i>Ramphastos_tucanus</i>      | 1 | 1 | 1 | 1 |

|                                   |   |   |   |   |
|-----------------------------------|---|---|---|---|
| <i>Ramphastos_vitellinus</i>      | 1 | 1 | 1 | 1 |
| <i>Ramphocaenus_melanurus</i>     | 1 | 1 | 1 | 1 |
| <i>Ramphocelus_bresilius</i>      | 1 | 1 | 1 | 1 |
| <i>Ramphocelus_carbo</i>          | 1 | 1 | 1 | 1 |
| <i>Ramphocelus_costaricensis</i>  | 1 | 1 | 1 | 1 |
| <i>Ramphocelus_dimidiatus</i>     | 1 | 1 | 1 | 1 |
| <i>Ramphocelus_flammeigerus</i>   | 1 | 1 | 1 | 1 |
| <i>Ramphocelus_icteronotus</i>    | 1 | 1 | 1 | 1 |
| <i>Ramphocelus_melanogaster</i>   | 1 | 1 | 1 | 1 |
| <i>Ramphocelus_nigrogularis</i>   | 1 | 1 | 1 | 1 |
| <i>Ramphocelus_passerinii</i>     | 1 | 1 | 1 | 1 |
| <i>Ramphocelus_sanguinolentus</i> | 1 | 1 | 1 | 1 |
| <i>Ramphocinclus_brachyurus</i>   | 1 | 1 | 1 | 1 |
| <i>Ramphodon_naevius</i>          | 1 | 1 | 1 | 1 |
| <i>Ramphomicron_microrhynchum</i> | 1 | 1 | 1 | 1 |
| <i>Ramphotrigon_fuscicauda</i>    | 1 | 1 | 1 | 1 |
| <i>Ramphotrigon_megacephalum</i>  | 1 | 1 | 1 | 1 |
| <i>Ramphotrigon_ruficauda</i>     | 1 | 1 | 1 | 1 |
| <i>Ramsayornis_fasciatus</i>      | 1 | 1 | 1 | 1 |
| <i>Ramsayornis_modestus</i>       | 1 | 1 | 1 | 1 |
| <i>Raphidura_leucopygialis</i>    | 1 | 1 | 1 | 1 |
| <i>Raphus_cucullatus</i>          | 1 | 1 | 1 | 1 |
| <i>Recurvirostra_americana</i>    | 1 | 1 | 1 | 1 |
| <i>Recurvirostra_andina</i>       | 1 | 1 | 1 | 1 |
| <i>Recurvirostra_avosetta</i>     | 1 | 1 | 1 | 1 |
| <i>Regulus_calendula</i>          | 1 | 1 | 1 | 1 |
| <i>Regulus_goodfellowi</i>        | 1 | 1 | 1 | 1 |
| <i>Regulus_ignicapilla</i>        | 1 | 1 | 1 | 1 |
| <i>Regulus_madeirensis</i>        | 1 | 1 | 1 | 1 |
| <i>Regulus_regulus</i>            | 1 | 1 | 1 | 1 |
| <i>Regulus_satrapa</i>            | 1 | 1 | 1 | 1 |
| <i>Regulus_teneriffae</i>         | 1 | 1 | 1 | 1 |
| <i>Reinwardtipicus_validus</i>    | 1 | 1 | 1 | 1 |
| <i>Reinwardtoena_browni</i>       | 1 | 1 | 1 | 1 |
| <i>Remiz_pendulinus</i>           | 1 | 1 | 1 | 1 |
| <i>Rhabdornis_inornatus</i>       | 1 | 1 | 1 | 1 |
| <i>Rhabdornis_mystacalis</i>      | 1 | 1 | 1 | 1 |
| <i>Rhagologus_leucostigma</i>     | 1 | 1 | 1 | 1 |
| <i>Rhea_americana</i>             | 1 | 1 | 1 | 1 |
| <i>Rhegmatorhina_gymnops</i>      | 1 | 1 | 1 | 1 |
| <i>Rhegmatorhina_hoffmannsi</i>   | 1 | 1 | 1 | 1 |
| <i>Rhegmatorhina_melanosticta</i> | 1 | 1 | 1 | 1 |
| <i>Rheinardia_ocellata</i>        | 1 | 1 | 1 | 1 |
| <i>Rhinocrypta_lanceolata</i>     | 1 | 1 | 1 | 1 |

|                                  |   |   |   |   |
|----------------------------------|---|---|---|---|
| <i>Rhinomyias_additus</i>        | 1 | 1 | 1 | 1 |
| <i>Rhinomyias_insignis</i>       | 1 | 1 | 1 | 1 |
| <i>Rhinomyias_olivaceus</i>      | 1 | 1 | 1 | 1 |
| <i>Rhinomyias_ruficauda</i>      | 1 | 1 | 1 | 1 |
| <i>Rhinomyias_umbratilis</i>     | 1 | 1 | 1 | 1 |
| <i>Rhinopomastus_cyanomelas</i>  | 1 | 1 | 1 | 1 |
| <i>Rhinoptilus_africanus</i>     | 1 | 1 | 1 | 1 |
| <i>Rhinoptilus_chalcopterus</i>  | 1 | 1 | 1 | 1 |
| <i>Rhipidura_albicollis</i>      | 1 | 1 | 1 | 1 |
| <i>Rhipidura_albolimbata</i>     | 1 | 1 | 1 | 1 |
| <i>Rhipidura_atra</i>            | 1 | 1 | 1 | 1 |
| <i>Rhipidura_aureola</i>         | 1 | 1 | 1 | 1 |
| <i>Rhipidura_brachyrhyncha</i>   | 1 | 1 | 1 | 1 |
| <i>Rhipidura_cockerelli</i>      | 1 | 1 | 1 | 1 |
| <i>Rhipidura_cyaniceps</i>       | 1 | 1 | 1 | 1 |
| <i>Rhipidura_dahli</i>           | 1 | 1 | 1 | 1 |
| <i>Rhipidura_diluta</i>          | 1 | 1 | 1 | 1 |
| <i>Rhipidura_fuliginosa</i>      | 1 | 1 | 1 | 1 |
| <i>Rhipidura_fuscorufa</i>       | 1 | 1 | 1 | 1 |
| <i>Rhipidura_hyperythra</i>      | 1 | 1 | 1 | 1 |
| <i>Rhipidura_hypoxantha</i>      | 1 | 1 | 1 | 1 |
| <i>Rhipidura_javanica</i>        | 1 | 1 | 1 | 1 |
| <i>Rhipidura_leucophrys</i>      | 1 | 1 | 1 | 1 |
| <i>Rhipidura_leucothorax</i>     | 1 | 1 | 1 | 1 |
| <i>Rhipidura_nigrocinnamomea</i> | 1 | 1 | 1 | 1 |
| <i>Rhipidura_perlata</i>         | 1 | 1 | 1 | 1 |
| <i>Rhipidura_phasiana</i>        | 1 | 1 | 1 | 1 |
| <i>Rhipidura_rennelliana</i>     | 1 | 1 | 1 | 1 |
| <i>Rhipidura_rufidorsa</i>       | 1 | 1 | 1 | 1 |
| <i>Rhipidura_rufifrons</i>       | 1 | 1 | 1 | 1 |
| <i>Rhipidura_rufiventris</i>     | 1 | 1 | 1 | 1 |
| <i>Rhipidura_superciliaris</i>   | 1 | 1 | 1 | 1 |
| <i>Rhipidura_tenebrosa</i>       | 1 | 1 | 1 | 1 |
| <i>Rhipidura_teysmanni</i>       | 1 | 1 | 1 | 1 |
| <i>Rhipidura_threnothorax</i>    | 1 | 1 | 1 | 1 |
| <i>Rhipidura_verreauxi</i>       | 1 | 1 | 1 | 1 |
| <i>Rhizothera_longirostris</i>   | 1 | 1 | 1 | 1 |
| <i>Rhodinocichla_rosea</i>       | 1 | 1 | 1 | 1 |
| <i>Rhodophoneus_cruentus</i>     | 1 | 1 | 1 | 1 |
| <i>Rhodopis_vesper</i>           | 1 | 1 | 1 | 1 |
| <i>Rhodospingus_cruentus</i>     | 1 | 1 | 1 | 1 |
| <i>Rhodospiza_obsoleta</i>       | 1 | 1 | 1 | 1 |
| <i>Rhodostethia_rosea</i>        | 1 | 1 | 1 | 1 |
| <i>Rhodothraupis_celaeno</i>     | 1 | 1 | 1 | 1 |



|                                   |   |   |   |   |
|-----------------------------------|---|---|---|---|
| <i>Rhopocichla atriceps</i>       | 1 | 1 | 1 | 1 |
| <i>Rhopophilus pekinensis</i>     | 1 | 1 | 1 | 1 |
| <i>Rhopornis ardesiacus</i>       | 1 | 1 | 1 | 1 |
| <i>Rhyacornis bicolor</i>         | 1 | 1 | 1 | 1 |
| <i>Rhyacornis fuliginosa</i>      | 1 | 1 | 1 | 1 |
| <i>Rhynchocyclus brevirostris</i> | 1 | 1 | 1 | 1 |
| <i>Rhynchocyclus fulvipectus</i>  | 1 | 1 | 1 | 1 |
| <i>Rhynchocyclus olivaceus</i>    | 1 | 1 | 1 | 1 |
| <i>Rhynchopsitta pachyrhyncha</i> | 1 | 1 | 1 | 1 |
| <i>Rhynchotus rufescens</i>       | 1 | 1 | 1 | 1 |
| <i>Rhynochetos jubatus</i>        | 1 | 1 | 1 | 1 |
| <i>Rhyticeros subruficollis</i>   | 1 | 1 | 1 | 1 |
| <i>Rhyticeros undulatus</i>       | 1 | 1 | 1 | 1 |
| <i>Rhytipterna simplex</i>        | 1 | 1 | 1 | 1 |
| <i>Rigidipenna inexpectata</i>    | 1 | 1 | 1 | 1 |
| <i>Rimator malacoptilus</i>       | 1 | 1 | 1 | 1 |
| <i>Riparia cincta</i>             | 1 | 1 | 1 | 1 |
| <i>Riparia paludicola</i>         | 1 | 1 | 1 | 1 |
| <i>Riparia riparia</i>            | 1 | 1 | 1 | 1 |
| <i>Rissa brevirostris</i>         | 1 | 1 | 1 | 1 |
| <i>Rissa tridactyla</i>           | 1 | 1 | 1 | 1 |
| <i>Rollandia rolland</i>          | 1 | 1 | 1 | 1 |
| <i>Rollulus rouloul</i>           | 1 | 1 | 1 | 1 |
| <i>Roraimia adusta</i>            | 1 | 1 | 1 | 1 |
| <i>Rostratula benghalensis</i>    | 1 | 1 | 1 | 1 |
| <i>Rostrhamus sociabilis</i>      | 1 | 1 | 1 | 1 |
| <i>Rowettia goughensis</i>        | 1 | 1 | 1 | 1 |
| <i>Rupicola peruviana</i>         | 1 | 1 | 1 | 1 |
| <i>Rupicola rupicola</i>          | 1 | 1 | 1 | 1 |
| <i>Ruwenzorornis johnstoni</i>    | 1 | 1 | 1 | 1 |
| <i>Rynchops niger</i>             | 1 | 1 | 1 | 1 |
| <i>Sagittarius serpentarius</i>   | 1 | 1 | 1 | 1 |
| <i>Sakesphorus bernardi</i>       | 1 | 1 | 1 | 1 |
| <i>Sakesphorus canadensis</i>     | 1 | 1 | 1 | 1 |
| <i>Sakesphorus cristatus</i>      | 1 | 1 | 1 | 1 |
| <i>Sakesphorus luctuosus</i>      | 1 | 1 | 1 | 1 |
| <i>Sakesphorus melanonotus</i>    | 1 | 1 | 1 | 1 |
| <i>Sakesphorus melanothorax</i>   | 1 | 1 | 1 | 1 |
| <i>Salpinctes obsoletus</i>       | 1 | 1 | 1 | 1 |
| <i>Salpornis spilonotus</i>       | 1 | 1 | 1 | 1 |
| <i>Saltator albicollis</i>        | 1 | 1 | 1 | 1 |
| <i>Saltator atriceps</i>          | 1 | 1 | 1 | 1 |
| <i>Saltator atricollis</i>        | 1 | 1 | 1 | 1 |
| <i>Saltator atripennis</i>        | 1 | 1 | 1 | 1 |

|                                  |   |   |   |   |
|----------------------------------|---|---|---|---|
| <i>Saltator_aurantirostris</i>   | 1 | 1 | 1 | 1 |
| <i>Saltator_coerulescens</i>     | 1 | 1 | 1 | 1 |
| <i>Saltator_grossus</i>          | 1 | 1 | 1 | 1 |
| <i>Saltator_maximus</i>          | 1 | 1 | 1 | 1 |
| <i>Saltator_nigriceps</i>        | 1 | 1 | 1 | 1 |
| <i>Saltator_rufiventris</i>      | 1 | 1 | 1 | 1 |
| <i>Saltator_similis</i>          | 1 | 1 | 1 | 1 |
| <i>Saltator_striatipectus</i>    | 1 | 1 | 1 | 1 |
| <i>Saltatricula_multicolor</i>   | 1 | 1 | 1 | 1 |
| <i>Sapayoa_aenigma</i>           | 1 | 1 | 1 | 1 |
| <i>Sapheopipo_noguchii</i>       | 1 | 1 | 1 | 1 |
| <i>Sappho_sparganura</i>         | 1 | 1 | 1 | 1 |
| <i>Sarcogyps_calvus</i>          | 1 | 1 | 1 | 1 |
| <i>Sarcops_calvus</i>            | 1 | 1 | 1 | 1 |
| <i>Sarcoramphus_papa</i>         | 1 | 1 | 1 | 1 |
| <i>Sarkidiornis_melanotos</i>    | 1 | 1 | 1 | 1 |
| <i>Saroglossa_aurata</i>         | 1 | 1 | 1 | 1 |
| <i>Saroglossa_spiloptera</i>     | 1 | 1 | 1 | 1 |
| <i>Sarothrura_elegans</i>        | 1 | 1 | 1 | 1 |
| <i>Sasia_abnormis</i>            | 1 | 1 | 1 | 1 |
| <i>Sasia_africana</i>            | 1 | 1 | 1 | 1 |
| <i>Sasia_ochracea</i>            | 1 | 1 | 1 | 1 |
| <i>Satrapa_icterophrys</i>       | 1 | 1 | 1 | 1 |
| <i>Saundersilarus_saundersi</i>  | 1 | 1 | 1 | 1 |
| <i>Saxicola_bifasciatus</i>      | 1 | 1 | 1 | 1 |
| <i>Saxicola_caprata</i>          | 1 | 1 | 1 | 1 |
| <i>Saxicola_dacotiae</i>         | 1 | 1 | 1 | 1 |
| <i>Saxicola_ferreus</i>          | 1 | 1 | 1 | 1 |
| <i>Saxicola_gutturalis</i>       | 1 | 1 | 1 | 1 |
| <i>Saxicola_insignis</i>         | 1 | 1 | 1 | 1 |
| <i>Saxicola_jerdoni</i>          | 1 | 1 | 1 | 1 |
| <i>Saxicola_leucurus</i>         | 1 | 1 | 1 | 1 |
| <i>Saxicola_rubetra</i>          | 1 | 1 | 1 | 1 |
| <i>Saxicola_tectes</i>           | 1 | 1 | 1 | 1 |
| <i>Saxicola_torquata</i>         | 1 | 1 | 1 | 1 |
| <i>Saxicoloides_fulicatus</i>    | 1 | 1 | 1 | 1 |
| <i>Sayornis_nigricans</i>        | 1 | 1 | 1 | 1 |
| <i>Sayornis_phoebe</i>           | 1 | 1 | 1 | 1 |
| <i>Sayornis_saya</i>             | 1 | 1 | 1 | 1 |
| <i>Scardafella_squammata</i>     | 1 | 1 | 1 | 1 |
| <i>Scelorchilus_rubecula</i>     | 1 | 1 | 1 | 1 |
| <i>Scenopoeetes_dentirostris</i> | 1 | 1 | 1 | 1 |
| <i>Scepomycter_winifredae</i>    | 1 | 1 | 1 | 1 |
| <i>Schetba_rufa</i>              | 1 | 1 | 1 | 1 |

|                                      |   |   |   |   |
|--------------------------------------|---|---|---|---|
| <i>Schiffornis_major</i>             | 1 | 1 | 1 | 1 |
| <i>Schiffornis_turdina</i>           | 1 | 1 | 1 | 1 |
| <i>Schiffornis_virescens</i>         | 1 | 1 | 1 | 1 |
| <i>Schistes_geoffroyi</i>            | 1 | 1 | 1 | 1 |
| <i>Schistochlamys_melanopis</i>      | 1 | 1 | 1 | 1 |
| <i>Schistochlamys_ruficapillus</i>   | 1 | 1 | 1 | 1 |
| <i>Schistocichla_leucostigma</i>     | 1 | 1 | 1 | 1 |
| <i>Schistolais_leontica</i>          | 1 | 1 | 1 | 1 |
| <i>Schistolais_leucopogon</i>        | 1 | 1 | 1 | 1 |
| <i>Schizoeaca_fuliginosa</i>         | 1 | 1 | 1 | 1 |
| <i>Schizoeaca_harterti</i>           | 1 | 1 | 1 | 1 |
| <i>Schizoeaca_helleri</i>            | 1 | 1 | 1 | 1 |
| <i>Schoenicola_brevirostris</i>      | 1 | 1 | 1 | 1 |
| <i>Schoeniophylax_phryganophilus</i> | 1 | 1 | 1 | 1 |
| <i>Scissirostrum_dubium</i>          | 1 | 1 | 1 | 1 |
| <i>Sclateria_naevia</i>              | 1 | 1 | 1 | 1 |
| <i>Sclerurus_guatemalensis</i>       | 1 | 1 | 1 | 1 |
| <i>Sclerurus_mexicanus</i>           | 1 | 1 | 1 | 1 |
| <i>Sclerurus_scansor</i>             | 1 | 1 | 1 | 1 |
| <i>Scolopax_minor</i>                | 1 | 1 | 1 | 1 |
| <i>Scolopax_rusticola</i>            | 1 | 1 | 1 | 1 |
| <i>Scopus_umbretta</i>               | 1 | 1 | 1 | 1 |
| <i>Scotocerca_inquieta</i>           | 1 | 1 | 1 | 1 |
| <i>Scytalopus_affinis</i>            | 1 | 1 | 1 | 1 |
| <i>Scytalopus_argentifrons</i>       | 1 | 1 | 1 | 1 |
| <i>Scytalopus_atratus</i>            | 1 | 1 | 1 | 1 |
| <i>Scytalopus_canus</i>              | 1 | 1 | 1 | 1 |
| <i>Scytalopus_femoralis</i>          | 1 | 1 | 1 | 1 |
| <i>Scytalopus_fuscus</i>             | 1 | 1 | 1 | 1 |
| <i>Scytalopus_griseicollis</i>       | 1 | 1 | 1 | 1 |
| <i>Scytalopus_iraiensis</i>          | 1 | 1 | 1 | 1 |
| <i>Scytalopus_latebricola</i>        | 1 | 1 | 1 | 1 |
| <i>Scytalopus_latrans</i>            | 1 | 1 | 1 | 1 |
| <i>Scytalopus_magellanicus</i>       | 1 | 1 | 1 | 1 |
| <i>Scytalopus_micropterus</i>        | 1 | 1 | 1 | 1 |
| <i>Scytalopus_novacapitalis</i>      | 1 | 1 | 1 | 1 |
| <i>Scytalopus_pachecoi</i>           | 1 | 1 | 1 | 1 |
| <i>Scytalopus_parvirostris</i>       | 1 | 1 | 1 | 1 |
| <i>Scytalopus_schulenbergi</i>       | 1 | 1 | 1 | 1 |
| <i>Scytalopus_sp._HHH-2009a</i>      | 1 | 1 | 1 | 1 |
| <i>Scytalopus_speluncae</i>          | 1 | 1 | 1 | 1 |
| <i>Scytalopus_spillmanni</i>         | 1 | 1 | 1 | 1 |
| <i>Scytalopus_superciliaris</i>      | 1 | 1 | 1 | 1 |
| <i>Scytalopus_unicolor</i>           | 1 | 1 | 1 | 1 |

|                                  |   |   |   |   |
|----------------------------------|---|---|---|---|
| <i>Scytalopus_vicinior</i>       | 1 | 1 | 1 | 1 |
| <i>Scytalopus_zimmeri</i>        | 1 | 1 | 1 | 1 |
| <i>Scythrops_novaehollandiae</i> | 1 | 1 | 1 | 1 |
| <i>Seicercus_affinis</i>         | 1 | 1 | 1 | 1 |
| <i>Seicercus_burkii</i>          | 1 | 1 | 1 | 1 |
| <i>Seicercus_castaniceps</i>     | 1 | 1 | 1 | 1 |
| <i>Seicercus_grammiceps</i>      | 1 | 1 | 1 | 1 |
| <i>Seicercus_montis</i>          | 1 | 1 | 1 | 1 |
| <i>Seicercus_omeiensis</i>       | 1 | 1 | 1 | 1 |
| <i>Seicercus_poliogenys</i>      | 1 | 1 | 1 | 1 |
| <i>Seicercus_soror</i>           | 1 | 1 | 1 | 1 |
| <i>Seicercus_tephrocephalus</i>  | 1 | 1 | 1 | 1 |
| <i>Seicercus_valentini</i>       | 1 | 1 | 1 | 1 |
| <i>Seicercus_whistleri</i>       | 1 | 1 | 1 | 1 |
| <i>Seicercus_xanthoschistos</i>  | 1 | 1 | 1 | 1 |
| <i>Seiurus_aurocapilla</i>       | 1 | 1 | 1 | 1 |
| <i>Selasphorus_flammula</i>      | 1 | 1 | 1 | 1 |
| <i>Selasphorus_platycercus</i>   | 1 | 1 | 1 | 1 |
| <i>Selasphorus_rufus</i>         | 1 | 1 | 1 | 1 |
| <i>Selasphorus_sasin</i>         | 1 | 1 | 1 | 1 |
| <i>Selenidera_culik</i>          | 1 | 1 | 1 | 1 |
| <i>Selenidera_gouldii</i>        | 1 | 1 | 1 | 1 |
| <i>Selenidera_maculirostris</i>  | 1 | 1 | 1 | 1 |
| <i>Selenidera_reinwardtii</i>    | 1 | 1 | 1 | 1 |
| <i>Selenidera_spectabilis</i>    | 1 | 1 | 1 | 1 |
| <i>Seleucidis_melanoleucus</i>   | 1 | 1 | 1 | 1 |
| <i>Semioptera_wallacii</i>       | 1 | 1 | 1 | 1 |
| <i>Semnornis_frantzii</i>        | 1 | 1 | 1 | 1 |
| <i>Semnornis_ramphastinus</i>    | 1 | 1 | 1 | 1 |
| <i>Sephanoides_fernandensis</i>  | 1 | 1 | 1 | 1 |
| <i>Sephanoides_sephanoides</i>   | 1 | 1 | 1 | 1 |
| <i>Sericornis_citreogularis</i>  | 1 | 1 | 1 | 1 |
| <i>Sericornis_frontalis</i>      | 1 | 1 | 1 | 1 |
| <i>Sericornis_keri</i>           | 1 | 1 | 1 | 1 |
| <i>Sericornis_magnirostris</i>   | 1 | 1 | 1 | 1 |
| <i>Sericornis_nouhuysi</i>       | 1 | 1 | 1 | 1 |
| <i>Sericornis_papuensis</i>      | 1 | 1 | 1 | 1 |
| <i>Sericornis_perspicillatus</i> | 1 | 1 | 1 | 1 |
| <i>Sericossypha_albocristata</i> | 1 | 1 | 1 | 1 |
| <i>Sericulus_aureus</i>          | 1 | 1 | 1 | 1 |
| <i>Sericulus_bakeri</i>          | 1 | 1 | 1 | 1 |
| <i>Sericulus_chrysocephalus</i>  | 1 | 1 | 1 | 1 |
| <i>Serilophus_lunatus</i>        | 1 | 1 | 1 | 1 |
| <i>Serinus_alario</i>            | 1 | 1 | 1 | 1 |

|                               |   |   |   |   |
|-------------------------------|---|---|---|---|
| <i>Serinus_albogularis</i>    | 1 | 1 | 1 | 1 |
| <i>Serinus_atrogularis</i>    | 1 | 1 | 1 | 1 |
| <i>Serinus_burtoni</i>        | 1 | 1 | 1 | 1 |
| <i>Serinus_canaria</i>        | 1 | 1 | 1 | 1 |
| <i>Serinus_canicollis</i>     | 1 | 1 | 1 | 1 |
| <i>Serinus_capistratus</i>    | 1 | 1 | 1 | 1 |
| <i>Serinus_citrinella</i>     | 1 | 1 | 1 | 1 |
| <i>Serinus_citrinelloides</i> | 1 | 1 | 1 | 1 |
| <i>Serinus_citrinipectus</i>  | 1 | 1 | 1 | 1 |
| <i>Serinus_dorsostriatus</i>  | 1 | 1 | 1 | 1 |
| <i>Serinus_flaviventris</i>   | 1 | 1 | 1 | 1 |
| <i>Serinus_flavivertex</i>    | 1 | 1 | 1 | 1 |
| <i>Serinus_gularis</i>        | 1 | 1 | 1 | 1 |
| <i>Serinus_hypostictus</i>    | 1 | 1 | 1 | 1 |
| <i>Serinus_leucopygius</i>    | 1 | 1 | 1 | 1 |
| <i>Serinus_mozambicus</i>     | 1 | 1 | 1 | 1 |
| <i>Serinus_pusillus</i>       | 1 | 1 | 1 | 1 |
| <i>Serinus_reichardi</i>      | 1 | 1 | 1 | 1 |
| <i>Serinus_scotops</i>        | 1 | 1 | 1 | 1 |
| <i>Serinus_serinus</i>        | 1 | 1 | 1 | 1 |
| <i>Serinus_striolatus</i>     | 1 | 1 | 1 | 1 |
| <i>Serinus_sulphuratus</i>    | 1 | 1 | 1 | 1 |
| <i>Serinus_syriacus</i>       | 1 | 1 | 1 | 1 |
| <i>Serinus_thibetanus</i>     | 1 | 1 | 1 | 1 |
| <i>Serinus_totta</i>          | 1 | 1 | 1 | 1 |
| <i>Serinus_whytii</i>         | 1 | 1 | 1 | 1 |
| <i>Serpophaga_cinerea</i>     | 1 | 1 | 1 | 1 |
| <i>Serpophaga_hypoleuca</i>   | 1 | 1 | 1 | 1 |
| <i>Serpophaga_munda</i>       | 1 | 1 | 1 | 1 |
| <i>Serpophaga_nigricans</i>   | 1 | 1 | 1 | 1 |
| <i>Serpophaga_subcristata</i> | 1 | 1 | 1 | 1 |
| <i>Setophaga_adelaidae</i>    | 1 | 1 | 1 | 1 |
| <i>Setophaga_americana</i>    | 1 | 1 | 1 | 1 |
| <i>Setophaga_angela</i>       | 1 | 1 | 1 | 1 |
| <i>Setophaga_caerulescens</i> | 1 | 1 | 1 | 1 |
| <i>Setophaga_castanea</i>     | 1 | 1 | 1 | 1 |
| <i>Setophaga_cerulea</i>      | 1 | 1 | 1 | 1 |
| <i>Setophaga_chrysoparia</i>  | 1 | 1 | 1 | 1 |
| <i>Setophaga_citrina</i>      | 1 | 1 | 1 | 1 |
| <i>Setophaga_coronata</i>     | 1 | 1 | 1 | 1 |
| <i>Setophaga_discolor</i>     | 1 | 1 | 1 | 1 |
| <i>Setophaga_dominica</i>     | 1 | 1 | 1 | 1 |
| <i>Setophaga_fusca</i>        | 1 | 1 | 1 | 1 |
| <i>Setophaga_graciae</i>      | 1 | 1 | 1 | 1 |

|                                  |   |   |   |   |
|----------------------------------|---|---|---|---|
| <i>Setophaga_kirtlandii</i>      | 1 | 1 | 1 | 1 |
| <i>Setophaga_magnolia</i>        | 1 | 1 | 1 | 1 |
| <i>Setophaga_nigrescens</i>      | 1 | 1 | 1 | 1 |
| <i>Setophaga_occidentalis</i>    | 1 | 1 | 1 | 1 |
| <i>Setophaga_palmarum</i>        | 1 | 1 | 1 | 1 |
| <i>Setophaga_pensylvanica</i>    | 1 | 1 | 1 | 1 |
| <i>Setophaga_petechia</i>        | 1 | 1 | 1 | 1 |
| <i>Setophaga_pharetra</i>        | 1 | 1 | 1 | 1 |
| <i>Setophaga_pinus</i>           | 1 | 1 | 1 | 1 |
| <i>Setophaga_pitiayumi</i>       | 1 | 1 | 1 | 1 |
| <i>Setophaga_pityophila</i>      | 1 | 1 | 1 | 1 |
| <i>Setophaga_plumbea</i>         | 1 | 1 | 1 | 1 |
| <i>Setophaga_ruticilla</i>       | 1 | 1 | 1 | 1 |
| <i>Setophaga_striata</i>         | 1 | 1 | 1 | 1 |
| <i>Setophaga_tigrina</i>         | 1 | 1 | 1 | 1 |
| <i>Setophaga_townsendi</i>       | 1 | 1 | 1 | 1 |
| <i>Setophaga_virens</i>          | 1 | 1 | 1 | 1 |
| <i>Setophaga_vitellina</i>       | 1 | 1 | 1 | 1 |
| <i>Setornis_criniger</i>         | 1 | 1 | 1 | 1 |
| <i>Sheppardia_aequatorialis</i>  | 1 | 1 | 1 | 1 |
| <i>Sheppardia_aurantiithorax</i> | 1 | 1 | 1 | 1 |
| <i>Sheppardia_bocagei</i>        | 1 | 1 | 1 | 1 |
| <i>Sheppardia_cyornithopsis</i>  | 1 | 1 | 1 | 1 |
| <i>Sheppardia_gabela</i>         | 1 | 1 | 1 | 1 |
| <i>Sheppardia_gunningi</i>       | 1 | 1 | 1 | 1 |
| <i>Sheppardia_lowei</i>          | 1 | 1 | 1 | 1 |
| <i>Sheppardia_montana</i>        | 1 | 1 | 1 | 1 |
| <i>Sheppardia_sharpei</i>        | 1 | 1 | 1 | 1 |
| <i>Sialia_curruoides</i>         | 1 | 1 | 1 | 1 |
| <i>Sialia_mexicana</i>           | 1 | 1 | 1 | 1 |
| <i>Sialia_sialis</i>             | 1 | 1 | 1 | 1 |
| <i>Sicalis_flaveola</i>          | 1 | 1 | 1 | 1 |
| <i>Sicalis_lutea</i>             | 1 | 1 | 1 | 1 |
| <i>Sicalis_luteocephala</i>      | 1 | 1 | 1 | 1 |
| <i>Sicalis_luteola</i>           | 1 | 1 | 1 | 1 |
| <i>Sicalis_olivascens</i>        | 1 | 1 | 1 | 1 |
| <i>Simoxenops_ucayalae</i>       | 1 | 1 | 1 | 1 |
| <i>Siphonorhis_brewsteri</i>     | 1 | 1 | 1 | 1 |
| <i>Siptornis_striaticollis</i>   | 1 | 1 | 1 | 1 |
| <i>Siptornis_hypochondriaca</i>  | 1 | 1 | 1 | 1 |
| <i>Sirystes_sibilator</i>        | 1 | 1 | 1 | 1 |
| <i>Sitta_canadensis</i>          | 1 | 1 | 1 | 1 |
| <i>Sitta_carolinensis</i>        | 1 | 1 | 1 | 1 |
| <i>Sitta_europaea</i>            | 1 | 1 | 1 | 1 |

|                                   |   |   |   |   |
|-----------------------------------|---|---|---|---|
| <i>Sitta_frontalis</i>            | 1 | 1 | 1 | 1 |
| <i>Sitta_himalayensis</i>         | 1 | 1 | 1 | 1 |
| <i>Sitta_krueperi</i>             | 1 | 1 | 1 | 1 |
| <i>Sitta_ledanti</i>              | 1 | 1 | 1 | 1 |
| <i>Sitta_neumayer</i>             | 1 | 1 | 1 | 1 |
| <i>Sitta_pusilla</i>              | 1 | 1 | 1 | 1 |
| <i>Sitta_pygmaea</i>              | 1 | 1 | 1 | 1 |
| <i>Sitta_tephronota</i>           | 1 | 1 | 1 | 1 |
| <i>Sitta_villosa</i>              | 1 | 1 | 1 | 1 |
| <i>Sitta_whiteheadi</i>           | 1 | 1 | 1 | 1 |
| <i>Sittasomus_griseicapillus</i>  | 1 | 1 | 1 | 1 |
| <i>Skutchia_borbae</i>            | 1 | 1 | 1 | 1 |
| <i>Smicrornis_brevirostris</i>    | 1 | 1 | 1 | 1 |
| <i>Smithornis_capensis</i>        | 1 | 1 | 1 | 1 |
| <i>Smithornis_rufolateralis</i>   | 1 | 1 | 1 | 1 |
| <i>Smithornis_sharpei</i>         | 1 | 1 | 1 | 1 |
| <i>Snowornis_cryptolophus</i>     | 1 | 1 | 1 | 1 |
| <i>Snowornis_subalaris</i>        | 1 | 1 | 1 | 1 |
| <i>Somateria_fischeri</i>         | 1 | 1 | 1 | 1 |
| <i>Somateria_mollissima</i>       | 1 | 1 | 1 | 1 |
| <i>Somateria_spectabilis</i>      | 1 | 1 | 1 | 1 |
| <i>Spartonoica_maluroides</i>     | 1 | 1 | 1 | 1 |
| <i>Speculanas_specularis</i>      | 1 | 1 | 1 | 1 |
| <i>Speculipastor_bicolor</i>      | 1 | 1 | 1 | 1 |
| <i>Speirops_brunneus</i>          | 1 | 1 | 1 | 1 |
| <i>Speirops_leucophoeus</i>       | 1 | 1 | 1 | 1 |
| <i>Speirops_lugubris</i>          | 1 | 1 | 1 | 1 |
| <i>Speirops_melanocephalus</i>    | 1 | 1 | 1 | 1 |
| <i>Spelaeornis_chocolatinus</i>   | 1 | 1 | 1 | 1 |
| <i>Spelaeornis_troglodytoides</i> | 1 | 1 | 1 | 1 |
| <i>Spermophaga_haematina</i>      | 1 | 1 | 1 | 1 |
| <i>Sphecothes_vieilloti</i>       | 1 | 1 | 1 | 1 |
| <i>Spheniscus_demersus</i>        | 1 | 1 | 1 | 1 |
| <i>Spheniscus_humboldti</i>       | 1 | 1 | 1 | 1 |
| <i>Spheniscus_magellanicus</i>    | 1 | 1 | 1 | 1 |
| <i>Spheniscus_mendiculus</i>      | 1 | 1 | 1 | 1 |
| <i>Sphenocichla_humei</i>         | 1 | 1 | 1 | 1 |
| <i>Sphenoeacus_afer</i>           | 1 | 1 | 1 | 1 |
| <i>Sphyrapicus_nuchalis</i>       | 1 | 1 | 1 | 1 |
| <i>Sphyrapicus_ruber</i>          | 1 | 1 | 1 | 1 |
| <i>Sphyrapicus_thyroideus</i>     | 1 | 1 | 1 | 1 |
| <i>Sphyrapicus_varius</i>         | 1 | 1 | 1 | 1 |
| <i>Spiloptila_clamans</i>         | 1 | 1 | 1 | 1 |
| <i>Spilornis_cheela</i>           | 1 | 1 | 1 | 1 |

|                                   |   |   |   |   |
|-----------------------------------|---|---|---|---|
| <i>Spilornis_elgini</i>           | 1 | 1 | 1 | 1 |
| <i>Spilornis_holospilus</i>       | 1 | 1 | 1 | 1 |
| <i>Spilornis_rufipectus</i>       | 1 | 1 | 1 | 1 |
| <i>Spindalis_dominicensis</i>     | 1 | 1 | 1 | 1 |
| <i>Spindalis_zena</i>             | 1 | 1 | 1 | 1 |
| <i>Spiza_americana</i>            | 1 | 1 | 1 | 1 |
| <i>Spizaetus_africanus</i>        | 1 | 1 | 1 | 1 |
| <i>Spizaetus_cirrhatus</i>        | 1 | 1 | 1 | 1 |
| <i>Spizaetus_lanceolatus</i>      | 1 | 1 | 1 | 1 |
| <i>Spizaetus_ornatus</i>          | 1 | 1 | 1 | 1 |
| <i>Spizaetus_philippensis</i>     | 1 | 1 | 1 | 1 |
| <i>Spizaetus_tyrannus</i>         | 1 | 1 | 1 | 1 |
| <i>Spizastur_melanoleucus</i>     | 1 | 1 | 1 | 1 |
| <i>Spizella_arborea</i>           | 1 | 1 | 1 | 1 |
| <i>Spizella_atrogularis</i>       | 1 | 1 | 1 | 1 |
| <i>Spizella_breweri</i>           | 1 | 1 | 1 | 1 |
| <i>Spizella_pallida</i>           | 1 | 1 | 1 | 1 |
| <i>Spizella_passerina</i>         | 1 | 1 | 1 | 1 |
| <i>Spizella_pusilla</i>           | 1 | 1 | 1 | 1 |
| <i>Spizella_wortheni</i>          | 1 | 1 | 1 | 1 |
| <i>Spiziapteryx_circumcincta</i>  | 1 | 1 | 1 | 1 |
| <i>Spizixos_semitorques</i>       | 1 | 1 | 1 | 1 |
| <i>Spizocorys_sclateri</i>        | 1 | 1 | 1 | 1 |
| <i>Sporophila_americana</i>       | 1 | 1 | 1 | 1 |
| <i>Sporophila_bouvreuil</i>       | 1 | 1 | 1 | 1 |
| <i>Sporophila_caerulescens</i>    | 1 | 1 | 1 | 1 |
| <i>Sporophila_castaneiventris</i> | 1 | 1 | 1 | 1 |
| <i>Sporophila_cinnamomea</i>      | 1 | 1 | 1 | 1 |
| <i>Sporophila_collaris</i>        | 1 | 1 | 1 | 1 |
| <i>Sporophila_corvina</i>         | 1 | 1 | 1 | 1 |
| <i>Sporophila_falcirostris</i>    | 1 | 1 | 1 | 1 |
| <i>Sporophila_hypochroma</i>      | 1 | 1 | 1 | 1 |
| <i>Sporophila_hypoxantha</i>      | 1 | 1 | 1 | 1 |
| <i>Sporophila_intermedia</i>      | 1 | 1 | 1 | 1 |
| <i>Sporophila_leucoptera</i>      | 1 | 1 | 1 | 1 |
| <i>Sporophila_luctuosa</i>        | 1 | 1 | 1 | 1 |
| <i>Sporophila_melanogaster</i>    | 1 | 1 | 1 | 1 |
| <i>Sporophila_minuta</i>          | 1 | 1 | 1 | 1 |
| <i>Sporophila_nigricollis</i>     | 1 | 1 | 1 | 1 |
| <i>Sporophila_nigrorufa</i>       | 1 | 1 | 1 | 1 |
| <i>Sporophila_palustris</i>       | 1 | 1 | 1 | 1 |
| <i>Sporophila_plumbea</i>         | 1 | 1 | 1 | 1 |
| <i>Sporophila_ruficollis</i>      | 1 | 1 | 1 | 1 |
| <i>Sporophila_schistacea</i>      | 1 | 1 | 1 | 1 |



|                                   |   |   |   |   |
|-----------------------------------|---|---|---|---|
| <i>Sporophila_telasco</i>         | 1 | 1 | 1 | 1 |
| <i>Sporophila_torqueola</i>       | 1 | 1 | 1 | 1 |
| <i>Sporopipes_frontalis</i>       | 1 | 1 | 1 | 1 |
| <i>Spreo_albicapillus</i>         | 1 | 1 | 1 | 1 |
| <i>Spreo_bicolor</i>              | 1 | 1 | 1 | 1 |
| <i>Spreo_fischeri</i>             | 1 | 1 | 1 | 1 |
| <i>Stachyris_ambigua</i>          | 1 | 1 | 1 | 1 |
| <i>Stachyris_capitalis</i>        | 1 | 1 | 1 | 1 |
| <i>Stachyris_chrysaea</i>         | 1 | 1 | 1 | 1 |
| <i>Stachyris_dennistouni</i>      | 1 | 1 | 1 | 1 |
| <i>Stachyris_erythroptera</i>     | 1 | 1 | 1 | 1 |
| <i>Stachyris_grammiceps</i>       | 1 | 1 | 1 | 1 |
| <i>Stachyris_hypogrammica</i>     | 1 | 1 | 1 | 1 |
| <i>Stachyris_latistriata</i>      | 1 | 1 | 1 | 1 |
| <i>Stachyris_leucotis</i>         | 1 | 1 | 1 | 1 |
| <i>Stachyris_maculata</i>         | 1 | 1 | 1 | 1 |
| <i>Stachyris_melanothorax</i>     | 1 | 1 | 1 | 1 |
| <i>Stachyris_nigriceps</i>        | 1 | 1 | 1 | 1 |
| <i>Stachyris_nigricollis</i>      | 1 | 1 | 1 | 1 |
| <i>Stachyris_nigrocapitata</i>    | 1 | 1 | 1 | 1 |
| <i>Stachyris_oglei</i>            | 1 | 1 | 1 | 1 |
| <i>Stachyris_plateni</i>          | 1 | 1 | 1 | 1 |
| <i>Stachyris_poliocephala</i>     | 1 | 1 | 1 | 1 |
| <i>Stachyris_pyrrhops</i>         | 1 | 1 | 1 | 1 |
| <i>Stachyris_ruficeps</i>         | 1 | 1 | 1 | 1 |
| <i>Stachyris_rufifrons</i>        | 1 | 1 | 1 | 1 |
| <i>Stachyris_speciosa</i>         | 1 | 1 | 1 | 1 |
| <i>Stachyris_strialata</i>        | 1 | 1 | 1 | 1 |
| <i>Stachyris_striata</i>          | 1 | 1 | 1 | 1 |
| <i>Stachyris_thoracica</i>        | 1 | 1 | 1 | 1 |
| <i>Stachyris_whiteheadi</i>       | 1 | 1 | 1 | 1 |
| <i>Stactolaema_leucotis</i>       | 1 | 1 | 1 | 1 |
| <i>Stactolaema_olivacea</i>       | 1 | 1 | 1 | 1 |
| <i>Stactolaema_whytii</i>         | 1 | 1 | 1 | 1 |
| <i>Stagonopleura_guttata</i>      | 1 | 1 | 1 | 1 |
| <i>Steatornis_caripensis</i>      | 1 | 1 | 1 | 1 |
| <i>Stelgidopteryx_ruficollis</i>  | 1 | 1 | 1 | 1 |
| <i>Stelgidopteryx_serripennis</i> | 1 | 1 | 1 | 1 |
| <i>Stellula_calliope</i>          | 1 | 1 | 1 | 1 |
| <i>Stenostira_scita</i>           | 1 | 1 | 1 | 1 |
| <i>Stephanoaetus_coronatus</i>    | 1 | 1 | 1 | 1 |
| <i>Stephanophorus_diadematus</i>  | 1 | 1 | 1 | 1 |
| <i>Stephanoxis_lalandi</i>        | 1 | 1 | 1 | 1 |
| <i>Stercorarius_antarcticus</i>   | 1 | 1 | 1 | 1 |

|                                  |   |   |   |   |
|----------------------------------|---|---|---|---|
| <i>Stercorarius_longicaudus</i>  | 1 | 1 | 1 | 1 |
| <i>Stercorarius_maccormicki</i>  | 1 | 1 | 1 | 1 |
| <i>Stercorarius_parasiticus</i>  | 1 | 1 | 1 | 1 |
| <i>Stercorarius_pomarinus</i>    | 1 | 1 | 1 | 1 |
| <i>Sterna_albostrata</i>         | 1 | 1 | 1 | 1 |
| <i>Sterna_bengalensis</i>        | 1 | 1 | 1 | 1 |
| <i>Sterna_bergii</i>             | 1 | 1 | 1 | 1 |
| <i>Sterna_dougallii</i>          | 1 | 1 | 1 | 1 |
| <i>Sterna_elegans</i>            | 1 | 1 | 1 | 1 |
| <i>Sterna_forsteri</i>           | 1 | 1 | 1 | 1 |
| <i>Sterna_hirundinacea</i>       | 1 | 1 | 1 | 1 |
| <i>Sterna_hirundo</i>            | 1 | 1 | 1 | 1 |
| <i>Sterna_paradisaea</i>         | 1 | 1 | 1 | 1 |
| <i>Sterna_striata</i>            | 1 | 1 | 1 | 1 |
| <i>Sterna_sumatrana</i>          | 1 | 1 | 1 | 1 |
| <i>Sterna_trudeaui</i>           | 1 | 1 | 1 | 1 |
| <i>Sterna_vittata</i>            | 1 | 1 | 1 | 1 |
| <i>Sternula_albifrons</i>        | 1 | 1 | 1 | 1 |
| <i>Sternula_antillarum</i>       | 1 | 1 | 1 | 1 |
| <i>Sternula_nereis</i>           | 1 | 1 | 1 | 1 |
| <i>Sternula_superciliaris</i>    | 1 | 1 | 1 | 1 |
| <i>Stictonetta_naevosa</i>       | 1 | 1 | 1 | 1 |
| <i>Stigmatura_budytoides</i>     | 1 | 1 | 1 | 1 |
| <i>Stigmatura_napensis</i>       | 1 | 1 | 1 | 1 |
| <i>Stiltia_isabella</i>          | 1 | 1 | 1 | 1 |
| <i>Stiphronis_erythrothorax</i>  | 1 | 1 | 1 | 1 |
| <i>Stiphronis_sanghensis</i>     | 1 | 1 | 1 | 1 |
| <i>Stipiturus_malachurus</i>     | 1 | 1 | 1 | 1 |
| <i>Stipiturus_mallee</i>         | 1 | 1 | 1 | 1 |
| <i>Stipiturus_ruficeps</i>       | 1 | 1 | 1 | 1 |
| <i>Stizorhina_finschi</i>        | 1 | 1 | 1 | 1 |
| <i>Stizorhina_fraseri</i>        | 1 | 1 | 1 | 1 |
| <i>Strepera_graculina</i>        | 1 | 1 | 1 | 1 |
| <i>Streptocitta_albicollis</i>   | 1 | 1 | 1 | 1 |
| <i>Streptopelia_bitorquata</i>   | 1 | 1 | 1 | 1 |
| <i>Streptopelia_capicola</i>     | 1 | 1 | 1 | 1 |
| <i>Streptopelia_chinensis</i>    | 1 | 1 | 1 | 1 |
| <i>Streptopelia_decaocto</i>     | 1 | 1 | 1 | 1 |
| <i>Streptopelia_decipiens</i>    | 1 | 1 | 1 | 1 |
| <i>Streptopelia_hypopyrrha</i>   | 1 | 1 | 1 | 1 |
| <i>Streptopelia_orientalis</i>   | 1 | 1 | 1 | 1 |
| <i>Streptopelia_picturata</i>    | 1 | 1 | 1 | 1 |
| <i>Streptopelia_roseogrisea</i>  | 1 | 1 | 1 | 1 |
| <i>Streptopelia_semitorquata</i> | 1 | 1 | 1 | 1 |

|                                   |   |   |   |   |
|-----------------------------------|---|---|---|---|
| <i>Streptopelia_senegalensis</i>  | 1 | 1 | 1 | 1 |
| <i>Streptopelia_tranquebarica</i> | 1 | 1 | 1 | 1 |
| <i>Streptopelia_turtur</i>        | 1 | 1 | 1 | 1 |
| <i>Streptopelia_vinacea</i>       | 1 | 1 | 1 | 1 |
| <i>Streptoprocne_zonaris</i>      | 1 | 1 | 1 | 1 |
| <i>Strigops_habroptilus</i>       | 1 | 1 | 1 | 1 |
| <i>Strix_aluco</i>                | 1 | 1 | 1 | 1 |
| <i>Strix_butleri</i>              | 1 | 1 | 1 | 1 |
| <i>Strix_davidi</i>               | 1 | 1 | 1 | 1 |
| <i>Strix_leptogrammica</i>        | 1 | 1 | 1 | 1 |
| <i>Strix_nebulosa</i>             | 1 | 1 | 1 | 1 |
| <i>Strix_occidentalis</i>         | 1 | 1 | 1 | 1 |
| <i>Strix_rufipes</i>              | 1 | 1 | 1 | 1 |
| <i>Strix_uralensis</i>            | 1 | 1 | 1 | 1 |
| <i>Strix_varia</i>                | 1 | 1 | 1 | 1 |
| <i>Strix_woodfordii</i>           | 1 | 1 | 1 | 1 |
| <i>Struthidea_cinerea</i>         | 1 | 1 | 1 | 1 |
| <i>Struthio_camelus</i>           | 1 | 1 | 0 | 1 |
| <i>Sturnella_bellicosa</i>        | 1 | 1 | 1 | 1 |
| <i>Sturnella_loyca</i>            | 1 | 1 | 1 | 1 |
| <i>Sturnella_magna</i>            | 1 | 1 | 1 | 1 |
| <i>Sturnella_militaris</i>        | 1 | 1 | 1 | 1 |
| <i>Sturnella_neglecta</i>         | 1 | 1 | 1 | 1 |
| <i>Sturnella_superciliaris</i>    | 1 | 1 | 1 | 1 |
| <i>Sturnus_albofrontatus</i>      | 1 | 1 | 1 | 1 |
| <i>Sturnus_burmannicus</i>        | 1 | 1 | 1 | 1 |
| <i>Sturnus_cineraceus</i>         | 1 | 1 | 1 | 1 |
| <i>Sturnus_contra</i>             | 1 | 1 | 1 | 1 |
| <i>Sturnus_erythropygius</i>      | 1 | 1 | 1 | 1 |
| <i>Sturnus_malabaricus</i>        | 1 | 1 | 1 | 1 |
| <i>Sturnus_nigricollis</i>        | 1 | 1 | 1 | 1 |
| <i>Sturnus_pagodarum</i>          | 1 | 1 | 1 | 1 |
| <i>Sturnus_philippensis</i>       | 1 | 1 | 1 | 1 |
| <i>Sturnus_roseus</i>             | 1 | 1 | 1 | 1 |
| <i>Sturnus_sericeus</i>           | 1 | 1 | 1 | 1 |
| <i>Sturnus_sinensis</i>           | 1 | 1 | 1 | 1 |
| <i>Sturnus_sturninus</i>          | 1 | 1 | 1 | 1 |
| <i>Sturnus_tristis</i>            | 1 | 1 | 1 | 1 |
| <i>Sturnus_unicolor</i>           | 1 | 1 | 1 | 1 |
| <i>Sturnus_vulgaris</i>           | 1 | 1 | 1 | 1 |
| <i>Sublegatus_arenarum</i>        | 1 | 1 | 1 | 1 |
| <i>Sublegatus_modestus</i>        | 1 | 1 | 1 | 1 |
| <i>Sublegatus_obscurior</i>       | 1 | 1 | 1 | 1 |
| <i>Suiriri_suiriri</i>            | 1 | 1 | 1 | 1 |

|                                     |   |   |   |   |
|-------------------------------------|---|---|---|---|
| <i>Sula_dactylatra</i>              | 1 | 1 | 1 | 1 |
| <i>Sula_granti</i>                  | 1 | 1 | 1 | 1 |
| <i>Sula_leucogaster</i>             | 1 | 1 | 1 | 1 |
| <i>Sula_nebouxii</i>                | 1 | 1 | 1 | 1 |
| <i>Sula_sula</i>                    | 1 | 1 | 1 | 1 |
| <i>Sula_variegata</i>               | 1 | 1 | 1 | 1 |
| <i>Surnia_ulula</i>                 | 1 | 1 | 1 | 1 |
| <i>Surniculus_lugubris</i>          | 1 | 1 | 1 | 1 |
| <i>Swynnertonia_swynnertonii</i>    | 1 | 1 | 1 | 1 |
| <i>Sylvia_atricapilla</i>           | 1 | 1 | 1 | 1 |
| <i>Sylvia_balearica</i>             | 1 | 1 | 1 | 1 |
| <i>Sylvia_boehmi</i>                | 1 | 1 | 1 | 1 |
| <i>Sylvia_borin</i>                 | 1 | 1 | 1 | 1 |
| <i>Sylvia_buryi</i>                 | 1 | 1 | 1 | 1 |
| <i>Sylvia_cantillans</i>            | 1 | 1 | 1 | 1 |
| <i>Sylvia_communis</i>              | 1 | 1 | 1 | 1 |
| <i>Sylvia_conspicillata</i>         | 1 | 1 | 1 | 1 |
| <i>Sylvia_crassirostris</i>         | 1 | 1 | 1 | 1 |
| <i>Sylvia_curruca</i>               | 1 | 1 | 1 | 1 |
| <i>Sylvia_deserticola</i>           | 1 | 1 | 1 | 1 |
| <i>Sylvia_hortensis</i>             | 1 | 1 | 1 | 1 |
| <i>Sylvia_layardi</i>               | 1 | 1 | 1 | 1 |
| <i>Sylvia_leucomelaena</i>          | 1 | 1 | 1 | 1 |
| <i>Sylvia_lugens</i>                | 1 | 1 | 1 | 1 |
| <i>Sylvia_melanocephala</i>         | 1 | 1 | 1 | 1 |
| <i>Sylvia_melanothorax</i>          | 1 | 1 | 1 | 1 |
| <i>Sylvia_mystacea</i>              | 1 | 1 | 1 | 1 |
| <i>Sylvia_nana</i>                  | 1 | 1 | 1 | 1 |
| <i>Sylvia_nisoria</i>               | 1 | 1 | 1 | 1 |
| <i>Sylvia_rueppelli</i>             | 1 | 1 | 1 | 1 |
| <i>Sylvia_sarda</i>                 | 1 | 1 | 1 | 1 |
| <i>Sylvia_subcaeruleum</i>          | 1 | 1 | 1 | 1 |
| <i>Sylvia_undata</i>                | 1 | 1 | 1 | 1 |
| <i>Sylvietta_brachyura</i>          | 1 | 1 | 1 | 1 |
| <i>Sylvietta_leucophrys</i>         | 1 | 1 | 1 | 1 |
| <i>Sylvietta_rufescens</i>          | 1 | 1 | 1 | 1 |
| <i>Sylvietta_virens</i>             | 1 | 1 | 1 | 1 |
| <i>Sylvietta_whytii</i>             | 1 | 1 | 1 | 1 |
| <i>Sylviorthorhynchus_desmursii</i> | 1 | 1 | 1 | 1 |
| <i>Sylviparus_modestus</i>          | 1 | 1 | 1 | 1 |
| <i>Syma_torotoro</i>                | 1 | 1 | 1 | 1 |
| <i>Synallaxis_albescens</i>         | 1 | 1 | 1 | 1 |
| <i>Synallaxis_azarae</i>            | 1 | 1 | 1 | 1 |
| <i>Synallaxis_cabanisi</i>          | 1 | 1 | 1 | 1 |

|                                    |   |   |   |   |
|------------------------------------|---|---|---|---|
| <i>Synallaxis_candei</i>           | 1 | 1 | 1 | 1 |
| <i>Synallaxis_cinerascens</i>      | 1 | 1 | 1 | 1 |
| <i>Synallaxis_cinnamomea</i>       | 1 | 1 | 1 | 1 |
| <i>Synallaxis_erythrothorax</i>    | 1 | 1 | 1 | 1 |
| <i>Synallaxis_frontalis</i>        | 1 | 1 | 1 | 1 |
| <i>Synallaxis_ruficapilla</i>      | 1 | 1 | 1 | 1 |
| <i>Synallaxis_rutilans</i>         | 1 | 1 | 1 | 1 |
| <i>Synallaxis_scutata</i>          | 1 | 1 | 1 | 1 |
| <i>Synallaxis_spixi</i>            | 1 | 1 | 1 | 1 |
| <i>Synallaxis_stictothonax</i>     | 1 | 1 | 1 | 1 |
| <i>Syndactyla_rufosuperciliata</i> | 1 | 1 | 1 | 1 |
| <i>Synthliboramphus_antiquus</i>   | 1 | 1 | 1 | 1 |
| <i>Synthliboramphus_craveri</i>    | 1 | 1 | 1 | 1 |
| <i>Synthliboramphus_hypoleucus</i> | 1 | 1 | 1 | 1 |
| <i>Synthliboramphus_wumizusume</i> | 1 | 1 | 1 | 1 |
| <i>Syrigma_sibilatrix</i>          | 1 | 1 | 1 | 1 |
| <i>Syrmaticus_elliotti</i>         | 1 | 1 | 1 | 1 |
| <i>Syrmaticus_humiae</i>           | 1 | 1 | 1 | 1 |
| <i>Syrmaticus_mikado</i>           | 1 | 1 | 1 | 1 |
| <i>Syrmaticus_reevesii</i>         | 1 | 1 | 1 | 1 |
| <i>Syrmaticus_soemmerringii</i>    | 1 | 1 | 1 | 1 |
| <i>Syrrhaptes_paradoxus</i>        | 1 | 1 | 1 | 1 |
| <i>Tachuris_rubrigastra</i>        | 1 | 1 | 1 | 1 |
| <i>Tachybaptus_dominicus</i>       | 1 | 1 | 1 | 1 |
| <i>Tachybaptus_novaehollandiae</i> | 1 | 1 | 1 | 1 |
| <i>Tachybaptus_ruficollis</i>      | 1 | 1 | 1 | 1 |
| <i>Tachycineta_albilinea</i>       | 1 | 1 | 1 | 1 |
| <i>Tachycineta_albiventer</i>      | 1 | 1 | 1 | 1 |
| <i>Tachycineta_bicolor</i>         | 1 | 1 | 1 | 1 |
| <i>Tachycineta_cyaneoviridis</i>   | 1 | 1 | 1 | 1 |
| <i>Tachycineta_euchrysea</i>       | 1 | 1 | 1 | 1 |
| <i>Tachycineta_leucorrhoea</i>     | 1 | 1 | 1 | 1 |
| <i>Tachycineta_meyeni</i>          | 1 | 1 | 1 | 1 |
| <i>Tachycineta_stolzmanni</i>      | 1 | 1 | 1 | 1 |
| <i>Tachycineta_thalassina</i>      | 1 | 1 | 1 | 1 |
| <i>Tachyeres_brachypterus</i>      | 1 | 1 | 1 | 1 |
| <i>Tachyeres_leucocephalus</i>     | 1 | 1 | 1 | 1 |
| <i>Tachyeres_patachonicus</i>      | 1 | 1 | 1 | 1 |
| <i>Tachyeres_pteneres</i>          | 1 | 1 | 1 | 1 |
| <i>Tachymarpis_melba</i>           | 1 | 1 | 1 | 1 |
| <i>Tachyphonus_coronatus</i>       | 1 | 1 | 1 | 1 |
| <i>Tachyphonus_cristatus</i>       | 1 | 1 | 1 | 1 |
| <i>Tachyphonus_delatrii</i>        | 1 | 1 | 1 | 1 |
| <i>Tachyphonus_luctuosus</i>       | 1 | 1 | 1 | 1 |

|                                   |   |   |   |   |
|-----------------------------------|---|---|---|---|
| <i>Tachyphonus phoenicius</i>     | 1 | 1 | 1 | 1 |
| <i>Tachyphonus rufiventer</i>     | 1 | 1 | 1 | 1 |
| <i>Tachyphonus rufus</i>          | 1 | 1 | 1 | 1 |
| <i>Tachyphonus surinamus</i>      | 1 | 1 | 1 | 1 |
| <i>Tadorna cana</i>               | 1 | 1 | 1 | 1 |
| <i>Tadorna ferruginea</i>         | 1 | 1 | 1 | 1 |
| <i>Tadorna radjah</i>             | 1 | 1 | 1 | 1 |
| <i>Tadorna tadorna</i>            | 1 | 1 | 1 | 1 |
| <i>Tadorna tadornoides</i>        | 1 | 1 | 1 | 1 |
| <i>Tadorna variegata</i>          | 1 | 1 | 1 | 1 |
| <i>Taeniopygia bichenovii</i>     | 1 | 1 | 1 | 1 |
| <i>Taeniopygia guttata</i>        | 1 | 1 | 1 | 1 |
| <i>Taeniotriccus andrei</i>       | 1 | 1 | 1 | 1 |
| <i>Talegalla fuscirostris</i>     | 1 | 1 | 0 | 1 |
| <i>Tangara argyrofenges</i>       | 1 | 1 | 1 | 1 |
| <i>Tangara arthus</i>             | 1 | 1 | 1 | 1 |
| <i>Tangara callophrys</i>         | 1 | 1 | 1 | 1 |
| <i>Tangara cayana</i>             | 1 | 1 | 1 | 1 |
| <i>Tangara chilensis</i>          | 1 | 1 | 1 | 1 |
| <i>Tangara chrysotis</i>          | 1 | 1 | 1 | 1 |
| <i>Tangara cucullata</i>          | 1 | 1 | 1 | 1 |
| <i>Tangara cyanicollis</i>        | 1 | 1 | 1 | 1 |
| <i>Tangara cyanocephala</i>       | 1 | 1 | 1 | 1 |
| <i>Tangara cyanoptera</i>         | 1 | 1 | 1 | 1 |
| <i>Tangara cyanotis</i>           | 1 | 1 | 1 | 1 |
| <i>Tangara cyanoventris</i>       | 1 | 1 | 1 | 1 |
| <i>Tangara desmaresti</i>         | 1 | 1 | 1 | 1 |
| <i>Tangara dowii</i>              | 1 | 1 | 1 | 1 |
| <i>Tangara fastuosa</i>           | 1 | 1 | 1 | 1 |
| <i>Tangara florida</i>            | 1 | 1 | 1 | 1 |
| <i>Tangara fucosa</i>             | 1 | 1 | 1 | 1 |
| <i>Tangara guttata</i>            | 1 | 1 | 1 | 1 |
| <i>Tangara gyrola</i>             | 1 | 1 | 1 | 1 |
| <i>Tangara heinei</i>             | 1 | 1 | 1 | 1 |
| <i>Tangara icterocephala</i>      | 1 | 1 | 1 | 1 |
| <i>Tangara inornata</i>           | 1 | 1 | 1 | 1 |
| <i>Tangara johannae</i>           | 1 | 1 | 1 | 1 |
| <i>Tangara labradorides</i>       | 1 | 1 | 1 | 1 |
| <i>Tangara larvata</i>            | 1 | 1 | 1 | 1 |
| <i>Tangara lavinia</i>            | 1 | 1 | 1 | 1 |
| <i>Tangara mexicana</i>           | 1 | 1 | 1 | 1 |
| <i>Tangara meyerdeschauenseei</i> | 1 | 1 | 1 | 1 |
| <i>Tangara nigrocincta</i>        | 1 | 1 | 1 | 1 |
| <i>Tangara nigroviridis</i>       | 1 | 1 | 1 | 1 |

|                                   |   |   |   |   |
|-----------------------------------|---|---|---|---|
| <i>Tangara_palmeri</i>            | 1 | 1 | 1 | 1 |
| <i>Tangara_parzudakii</i>         | 1 | 1 | 1 | 1 |
| <i>Tangara_preciosa</i>           | 1 | 1 | 1 | 1 |
| <i>Tangara_pulcherrima</i>        | 1 | 1 | 1 | 1 |
| <i>Tangara_punctata</i>           | 1 | 1 | 1 | 1 |
| <i>Tangara_ruficervix</i>         | 1 | 1 | 1 | 1 |
| <i>Tangara_rufigula</i>           | 1 | 1 | 1 | 1 |
| <i>Tangara_schrankii</i>          | 1 | 1 | 1 | 1 |
| <i>Tangara_seledon</i>            | 1 | 1 | 1 | 1 |
| <i>Tangara_varia</i>              | 1 | 1 | 1 | 1 |
| <i>Tangara_vassorii</i>           | 1 | 1 | 1 | 1 |
| <i>Tangara_velia</i>              | 1 | 1 | 1 | 1 |
| <i>Tangara_viridicollis</i>       | 1 | 1 | 1 | 1 |
| <i>Tangara_vitriolina</i>         | 1 | 1 | 1 | 1 |
| <i>Tangara_xanthocephala</i>      | 1 | 1 | 1 | 1 |
| <i>Tangara_xanthogastra</i>       | 1 | 1 | 1 | 1 |
| <i>Tanygnathus_lucionensis</i>    | 1 | 1 | 1 | 1 |
| <i>Tanygnathus_megalorynchos</i>  | 1 | 1 | 1 | 1 |
| <i>Tanygnathus_sumatranus</i>     | 1 | 1 | 1 | 1 |
| <i>Tanyptera_galatea</i>          | 1 | 1 | 1 | 1 |
| <i>Tapera_naevia</i>              | 1 | 1 | 1 | 1 |
| <i>Taphrolesbia_griseiventris</i> | 1 | 1 | 1 | 1 |
| <i>Taphrospilus_hypostictus</i>   | 1 | 1 | 1 | 1 |
| <i>Taraba_major</i>               | 1 | 1 | 1 | 1 |
| <i>Tarsiger_chrysaeus</i>         | 1 | 1 | 1 | 1 |
| <i>Tarsiger_cyanurus</i>          | 1 | 1 | 1 | 1 |
| <i>Tarsiger_hyperythrus</i>       | 1 | 1 | 1 | 1 |
| <i>Tarsiger_indicus</i>           | 1 | 1 | 1 | 1 |
| <i>Tarsiger_johnstoniae</i>       | 1 | 1 | 1 | 1 |
| <i>Tauraco_bannermani</i>         | 1 | 1 | 1 | 1 |
| <i>Tauraco_corythaix</i>          | 1 | 1 | 1 | 1 |
| <i>Tauraco_erythrolophus</i>      | 1 | 1 | 1 | 1 |
| <i>Tauraco_fischeri</i>           | 1 | 1 | 1 | 1 |
| <i>Tauraco_hartlaubi</i>          | 1 | 1 | 1 | 1 |
| <i>Tauraco_leucolophus</i>        | 1 | 1 | 1 | 1 |
| <i>Tauraco_leucotis</i>           | 1 | 1 | 1 | 1 |
| <i>Tauraco_livingstonii</i>       | 1 | 1 | 1 | 1 |
| <i>Tauraco_macrorhynchus</i>      | 1 | 1 | 1 | 1 |
| <i>Tauraco_persa</i>              | 1 | 1 | 1 | 1 |
| <i>Tauraco_porphyreolophus</i>    | 1 | 1 | 1 | 1 |
| <i>Tauraco_schalowi</i>           | 1 | 1 | 1 | 1 |
| <i>Tauraco_schuetti</i>           | 1 | 1 | 1 | 1 |
| <i>Tchagra_australis</i>          | 1 | 1 | 1 | 1 |
| <i>Tchagra_minuta</i>             | 1 | 1 | 1 | 1 |

|                                    |   |   |   |   |
|------------------------------------|---|---|---|---|
| <i>Tchagra_senegalus</i>           | 1 | 1 | 1 | 1 |
| <i>Teledromas_fuscus</i>           | 1 | 1 | 1 | 1 |
| <i>Telespiza_cantans</i>           | 1 | 1 | 1 | 1 |
| <i>Telespiza_ultima</i>            | 1 | 1 | 1 | 1 |
| <i>Telophorus_bocagei</i>          | 1 | 1 | 1 | 1 |
| <i>Telophorus_dohertyi</i>         | 1 | 1 | 1 | 1 |
| <i>Telophorus_nigrifrons</i>       | 1 | 1 | 1 | 1 |
| <i>Telophorus_sulfureopectus</i>   | 1 | 1 | 1 | 1 |
| <i>Telophorus_zeylonus</i>         | 1 | 1 | 1 | 1 |
| <i>Temnurus_temnurus</i>           | 1 | 1 | 1 | 1 |
| <i>Tephrodornis_gularis</i>        | 1 | 1 | 1 | 1 |
| <i>Tephrodornis_pondicerianus</i>  | 1 | 1 | 1 | 1 |
| <i>Terathopius_ecaudatus</i>       | 1 | 1 | 1 | 1 |
| <i>Terenotriccus_erythrurus</i>    | 1 | 1 | 1 | 1 |
| <i>Terenura_callinota</i>          | 1 | 1 | 1 | 1 |
| <i>Terenura_humeralis</i>          | 1 | 1 | 1 | 1 |
| <i>Terenura_sharpei</i>            | 1 | 1 | 1 | 1 |
| <i>Teretistris_fernandinae</i>     | 1 | 1 | 1 | 1 |
| <i>Terpsiphone_cinnamomea</i>      | 1 | 1 | 1 | 1 |
| <i>Terpsiphone_paradisi</i>        | 1 | 1 | 1 | 1 |
| <i>Terpsiphone_viridis</i>         | 1 | 1 | 1 | 1 |
| <i>Tersina_viridis</i>             | 1 | 1 | 1 | 1 |
| <i>Tesia_olivea</i>                | 1 | 1 | 1 | 1 |
| <i>Tetrao_parvirostris</i>         | 1 | 1 | 1 | 1 |
| <i>Tetrao_urogallus</i>            | 1 | 1 | 1 | 1 |
| <i>Tetraogallus_altaicus</i>       | 1 | 1 | 1 | 1 |
| <i>Tetraogallus_caspius</i>        | 1 | 1 | 1 | 1 |
| <i>Tetraogallus_himalayensis</i>   | 1 | 1 | 1 | 1 |
| <i>Tetraogallus_tibetanus</i>      | 1 | 1 | 1 | 1 |
| <i>Tetraophasis_obscurus</i>       | 1 | 1 | 1 | 1 |
| <i>Tetraophasis_szechenyii</i>     | 1 | 1 | 1 | 1 |
| <i>Tetrastes_bonasia</i>           | 1 | 1 | 1 | 1 |
| <i>Tetrax_tetrax</i>               | 1 | 1 | 1 | 1 |
| <i>Thalassarche_bulleri</i>        | 1 | 1 | 1 | 1 |
| <i>Thalassarche_carteri</i>        | 1 | 1 | 1 | 1 |
| <i>Thalassarche_cauta</i>          | 1 | 1 | 1 | 1 |
| <i>Thalassarche_chlororhynchos</i> | 1 | 1 | 1 | 1 |
| <i>Thalassarche_eremita</i>        | 1 | 1 | 1 | 1 |
| <i>Thalassarche_impavida</i>       | 1 | 1 | 1 | 1 |
| <i>Thalassarche_melanophrys</i>    | 1 | 1 | 1 | 1 |
| <i>Thalassarche_salvini</i>        | 1 | 1 | 1 | 1 |
| <i>Thalassarche_steadii</i>        | 1 | 1 | 1 | 1 |
| <i>Thalasseus_maximus</i>          | 1 | 1 | 1 | 1 |
| <i>Thalasseus_sandvicensis</i>     | 1 | 1 | 1 | 1 |



|                                     |   |   |   |   |
|-------------------------------------|---|---|---|---|
| <i>Thalassoica_antarctica</i>       | 1 | 1 | 1 | 1 |
| <i>Thalassornis_leuconotus</i>      | 1 | 1 | 1 | 1 |
| <i>Thalurania_colombica</i>         | 1 | 1 | 1 | 1 |
| <i>Thalurania_fannyi</i>            | 1 | 1 | 1 | 1 |
| <i>Thalurania_furcata</i>           | 1 | 1 | 1 | 1 |
| <i>Thalurania_glaucopis</i>         | 1 | 1 | 1 | 1 |
| <i>Thamnistes_anabatinus</i>        | 1 | 1 | 1 | 1 |
| <i>Thamnolaea_cinnamomeiventris</i> | 1 | 1 | 1 | 1 |
| <i>Thamnolaea_semirufa</i>          | 1 | 1 | 1 | 1 |
| <i>Thamnomanes_ardesiacus</i>       | 1 | 1 | 1 | 1 |
| <i>Thamnomanes_caesius</i>          | 1 | 1 | 1 | 1 |
| <i>Thamnomanes_saturninus</i>       | 1 | 1 | 1 | 1 |
| <i>Thamnomanes_schistogynus</i>     | 1 | 1 | 1 | 1 |
| <i>Thamnophilus_aethiops</i>        | 1 | 1 | 1 | 1 |
| <i>Thamnophilus_amazonicus</i>      | 1 | 1 | 1 | 1 |
| <i>Thamnophilus_ambiguus</i>        | 1 | 1 | 1 | 1 |
| <i>Thamnophilus_aroyae</i>          | 1 | 1 | 1 | 1 |
| <i>Thamnophilus_atrinucha</i>       | 1 | 1 | 1 | 1 |
| <i>Thamnophilus_bridgesi</i>        | 1 | 1 | 1 | 1 |
| <i>Thamnophilus_caerulescens</i>    | 1 | 1 | 1 | 1 |
| <i>Thamnophilus_cryptoleucus</i>    | 1 | 1 | 1 | 1 |
| <i>Thamnophilus_doliatus</i>        | 1 | 1 | 1 | 1 |
| <i>Thamnophilus_insignis</i>        | 1 | 1 | 1 | 1 |
| <i>Thamnophilus_multistriatus</i>   | 1 | 1 | 1 | 1 |
| <i>Thamnophilus_murinus</i>         | 1 | 1 | 1 | 1 |
| <i>Thamnophilus_nigriceps</i>       | 1 | 1 | 1 | 1 |
| <i>Thamnophilus_nigrocinereus</i>   | 1 | 1 | 1 | 1 |
| <i>Thamnophilus_palliatus</i>       | 1 | 1 | 1 | 1 |
| <i>Thamnophilus_pelzelni</i>        | 1 | 1 | 1 | 1 |
| <i>Thamnophilus_praecox</i>         | 1 | 1 | 1 | 1 |
| <i>Thamnophilus_punctatus</i>       | 1 | 1 | 1 | 1 |
| <i>Thamnophilus_ruficapillus</i>    | 1 | 1 | 1 | 1 |
| <i>Thamnophilus_schistaceus</i>     | 1 | 1 | 1 | 1 |
| <i>Thamnophilus_stictocephalus</i>  | 1 | 1 | 1 | 1 |
| <i>Thamnophilus_sticturus</i>       | 1 | 1 | 1 | 1 |
| <i>Thamnophilus_tenuipunctatus</i>  | 1 | 1 | 1 | 1 |
| <i>Thamnophilus_torquatus</i>       | 1 | 1 | 1 | 1 |
| <i>Thamnophilus_unicolor</i>        | 1 | 1 | 1 | 1 |
| <i>Thamnophilus_zarumae</i>         | 1 | 1 | 1 | 1 |
| <i>Thamnornis_chloropetoides</i>    | 1 | 1 | 1 | 1 |
| <i>Thaumastura_cora</i>             | 1 | 1 | 1 | 1 |
| <i>Theristicus_caerulescens</i>     | 1 | 1 | 1 | 1 |
| <i>Theristicus_caudatus</i>         | 1 | 1 | 1 | 1 |
| <i>Theristicus_melanopis</i>        | 1 | 1 | 1 | 1 |

|                                    |   |   |   |   |
|------------------------------------|---|---|---|---|
| <i>Thescelocichla_leucopleura</i>  | 1 | 1 | 1 | 1 |
| <i>Thinocorus_orbignyianus</i>     | 1 | 1 | 1 | 1 |
| <i>Thinocorus_rumicivorus</i>      | 1 | 1 | 1 | 1 |
| <i>Thinornis_novaeseelandiae</i>   | 1 | 1 | 1 | 1 |
| <i>Thinornis_rubricollis</i>       | 1 | 1 | 1 | 1 |
| <i>Thlypopsis_ruficeps</i>         | 1 | 1 | 1 | 1 |
| <i>Thlypopsis_sordida</i>          | 1 | 1 | 1 | 1 |
| <i>Thraupis_abbas</i>              | 1 | 1 | 1 | 1 |
| <i>Thraupis_bonariensis</i>        | 1 | 1 | 1 | 1 |
| <i>Thraupis_cyanocephala</i>       | 1 | 1 | 1 | 1 |
| <i>Thraupis_cyanoptera</i>         | 1 | 1 | 1 | 1 |
| <i>Thraupis_episcopus</i>          | 1 | 1 | 1 | 1 |
| <i>Thraupis_ornata</i>             | 1 | 1 | 1 | 1 |
| <i>Thraupis_palmarum</i>           | 1 | 1 | 1 | 1 |
| <i>Thraupis_sayaca</i>             | 1 | 1 | 1 | 1 |
| <i>Threnetes_leucurus</i>          | 1 | 1 | 1 | 1 |
| <i>Threnetes_ruckeri</i>           | 1 | 1 | 1 | 1 |
| <i>Threskiornis_aethiopicus</i>    | 1 | 1 | 1 | 1 |
| <i>Threskiornis_molucca</i>        | 1 | 1 | 1 | 1 |
| <i>Thripadectes_flammulatus</i>    | 1 | 1 | 1 | 1 |
| <i>Thripadectes_ignobilis</i>      | 1 | 1 | 1 | 1 |
| <i>Thripadectes_rufobrunneus</i>   | 1 | 1 | 1 | 1 |
| <i>Thripophaga_fusciceps</i>       | 1 | 1 | 1 | 1 |
| <i>Thryomanes_bewickii</i>         | 1 | 1 | 1 | 1 |
| <i>Thryomanes_sissonii</i>         | 1 | 1 | 1 | 1 |
| <i>Thryophilus_pleurostictus</i>   | 1 | 1 | 1 | 1 |
| <i>Thryophilus_rufalbus</i>        | 1 | 1 | 1 | 1 |
| <i>Thryorchilus_browni</i>         | 1 | 1 | 1 | 1 |
| <i>Thryothorus_atrogularis</i>     | 1 | 1 | 1 | 1 |
| <i>Thryothorus_euophrys</i>        | 1 | 1 | 1 | 1 |
| <i>Thryothorus_fasciatoventris</i> | 1 | 1 | 1 | 1 |
| <i>Thryothorus_felix</i>           | 1 | 1 | 1 | 1 |
| <i>Thryothorus_genibarbis</i>      | 1 | 1 | 1 | 1 |
| <i>Thryothorus_guarayanus</i>      | 1 | 1 | 1 | 1 |
| <i>Thryothorus_leucopogon</i>      | 1 | 1 | 1 | 1 |
| <i>Thryothorus_leucotis</i>        | 1 | 1 | 1 | 1 |
| <i>Thryothorus_longirostris</i>    | 1 | 1 | 1 | 1 |
| <i>Thryothorus_ludovicianus</i>    | 1 | 1 | 1 | 1 |
| <i>Thryothorus_maculipectus</i>    | 1 | 1 | 1 | 1 |
| <i>Thryothorus_modestus</i>        | 1 | 1 | 1 | 1 |
| <i>Thryothorus_mystacalis</i>      | 1 | 1 | 1 | 1 |
| <i>Thryothorus_nigricapillus</i>   | 1 | 1 | 1 | 1 |
| <i>Thryothorus_rutilus</i>         | 1 | 1 | 1 | 1 |
| <i>Thryothorus_sclateri</i>        | 1 | 1 | 1 | 1 |

|                                  |   |   |   |   |
|----------------------------------|---|---|---|---|
| <i>Thryothorus_semibadius</i>    | 1 | 1 | 1 | 1 |
| <i>Thryothorus_sinaloa</i>       | 1 | 1 | 1 | 1 |
| <i>Thryothorus_superciliaris</i> | 1 | 1 | 1 | 1 |
| <i>Thryothorus_thoracicus</i>    | 1 | 1 | 1 | 1 |
| <i>Tiaris_bicolor</i>            | 1 | 1 | 1 | 1 |
| <i>Tiaris_canora</i>             | 1 | 1 | 1 | 1 |
| <i>Tiaris_fuliginosus</i>        | 1 | 1 | 1 | 1 |
| <i>Tiaris_obscura</i>            | 1 | 1 | 1 | 1 |
| <i>Tiaris_olivaceus</i>          | 1 | 1 | 1 | 1 |
| <i>Tichodroma_muraria</i>        | 1 | 1 | 1 | 1 |
| <i>Tickellia_hodgsoni</i>        | 1 | 1 | 1 | 1 |
| <i>Tigrisoma_fasciatum</i>       | 1 | 1 | 1 | 1 |
| <i>Tigrisoma_lineatum</i>        | 1 | 1 | 1 | 1 |
| <i>Tijuca_atra</i>               | 1 | 1 | 1 | 1 |
| <i>Timalia_pileata</i>           | 1 | 1 | 1 | 1 |
| <i>Timeliopsis_fulvigula</i>     | 1 | 1 | 1 | 1 |
| <i>Timeliopsis_griseigula</i>    | 1 | 1 | 1 | 1 |
| <i>Tinamotis_ingoufi</i>         | 1 | 1 | 1 | 1 |
| <i>Tinamotis_pentlandii</i>      | 1 | 1 | 1 | 1 |
| <i>Tinamus_major</i>             | 1 | 1 | 1 | 1 |
| <i>Tityra_cayana</i>             | 1 | 1 | 1 | 1 |
| <i>Tityra_inquisitor</i>         | 1 | 1 | 1 | 1 |
| <i>Tityra_semifasciata</i>       | 1 | 1 | 1 | 1 |
| <i>Tockus_alboterminatus</i>     | 1 | 1 | 1 | 1 |
| <i>Tockus_camurus</i>            | 1 | 1 | 1 | 1 |
| <i>Tockus_deckeni</i>            | 1 | 1 | 1 | 1 |
| <i>Tockus_erythrorhynchus</i>    | 1 | 1 | 1 | 1 |
| <i>Tockus_fasciatus</i>          | 1 | 1 | 1 | 1 |
| <i>Tockus_flavirostris</i>       | 1 | 1 | 1 | 1 |
| <i>Tockus_leucomelas</i>         | 1 | 1 | 1 | 1 |
| <i>Tockus_monteiri</i>           | 1 | 1 | 1 | 1 |
| <i>Tockus_nasutus</i>            | 1 | 1 | 1 | 1 |
| <i>Todiramphus_chloris</i>       | 1 | 1 | 1 | 1 |
| <i>Todiramphus_macleayi</i>      | 1 | 1 | 1 | 1 |
| <i>Todiramphus_sanctus</i>       | 1 | 1 | 1 | 1 |
| <i>Todirostrum_cinereum</i>      | 1 | 1 | 1 | 1 |
| <i>Todirostrum_maculatum</i>     | 1 | 1 | 1 | 1 |
| <i>Todirostrum_pictum</i>        | 1 | 1 | 1 | 1 |
| <i>Todus_angustirostris</i>      | 1 | 1 | 1 | 1 |
| <i>Todus_mexicanus</i>           | 1 | 1 | 1 | 1 |
| <i>Todus_multicolor</i>          | 1 | 1 | 1 | 1 |
| <i>Todus_subulatus</i>           | 1 | 1 | 1 | 1 |
| <i>Todus_todus</i>               | 1 | 1 | 1 | 1 |
| <i>Tolmomyias_assimilis</i>      | 1 | 1 | 1 | 1 |

|                                      |   |   |   |   |
|--------------------------------------|---|---|---|---|
| <i>Tolmomyias_flaviventris</i>       | 1 | 1 | 1 | 1 |
| <i>Tolmomyias_poliocephalus</i>      | 1 | 1 | 1 | 1 |
| <i>Tolmomyias_sulphurescens</i>      | 1 | 1 | 1 | 1 |
| <i>Topaza_pella</i>                  | 1 | 1 | 1 | 1 |
| <i>Torgos_tracheliotus</i>           | 1 | 1 | 1 | 1 |
| <i>Touit_batavicus</i>               | 1 | 1 | 1 | 1 |
| <i>Toxorhamphus_novaeguineae</i>     | 1 | 1 | 1 | 1 |
| <i>Toxorhamphus_poliopterus</i>      | 1 | 1 | 1 | 1 |
| <i>Toxostoma_bendirei</i>            | 1 | 1 | 1 | 1 |
| <i>Toxostoma_cinereum</i>            | 1 | 1 | 1 | 1 |
| <i>Toxostoma_crissale</i>            | 1 | 1 | 1 | 1 |
| <i>Toxostoma_curvirostre</i>         | 1 | 1 | 1 | 1 |
| <i>Toxostoma_guttatum</i>            | 1 | 1 | 1 | 1 |
| <i>Toxostoma_lecontei</i>            | 1 | 1 | 1 | 1 |
| <i>Toxostoma_longirostre</i>         | 1 | 1 | 1 | 1 |
| <i>Toxostoma_ocellatum</i>           | 1 | 1 | 1 | 1 |
| <i>Toxostoma_redivivum</i>           | 1 | 1 | 1 | 1 |
| <i>Toxostoma_rufum</i>               | 1 | 1 | 1 | 1 |
| <i>Trachyphonus_darnaudii</i>        | 1 | 1 | 1 | 1 |
| <i>Trachyphonus_erythrocephalus</i>  | 1 | 1 | 1 | 1 |
| <i>Trachyphonus_purpuratus</i>       | 1 | 1 | 1 | 1 |
| <i>Trachyphonus_usambiro</i>         | 1 | 1 | 1 | 1 |
| <i>Tragopan_blythii</i>              | 1 | 1 | 1 | 1 |
| <i>Tragopan_caboti</i>               | 1 | 1 | 1 | 1 |
| <i>Tragopan_satyra</i>               | 1 | 1 | 1 | 1 |
| <i>Tragopan_temminckii</i>           | 1 | 1 | 1 | 1 |
| <i>Tregellasia_capito</i>            | 1 | 1 | 1 | 1 |
| <i>Tregellasia_leucops</i>           | 1 | 1 | 1 | 1 |
| <i>Treron_australis</i>              | 1 | 1 | 1 | 1 |
| <i>Treron_calvus</i>                 | 1 | 1 | 1 | 1 |
| <i>Treron_sieboldii</i>              | 1 | 1 | 1 | 1 |
| <i>Treron_vernans</i>                | 1 | 1 | 1 | 1 |
| <i>Treron_waalii</i>                 | 1 | 1 | 1 | 1 |
| <i>Trichastoma_bicolor</i>           | 1 | 1 | 1 | 1 |
| <i>Trichastoma_celebense</i>         | 1 | 1 | 1 | 1 |
| <i>Trichastoma_rostratum</i>         | 1 | 1 | 1 | 1 |
| <i>Trichixos_pyrropygus</i>          | 1 | 1 | 1 | 1 |
| <i>Trichodere_cockerelli</i>         | 1 | 1 | 1 | 1 |
| <i>Trichoglossus_chlorolepidotus</i> | 1 | 1 | 1 | 1 |
| <i>Trichoglossus_euteles</i>         | 1 | 1 | 1 | 1 |
| <i>Trichoglossus_haematodus</i>      | 1 | 1 | 1 | 1 |
| <i>Trichoglossus_johnstoniae</i>     | 1 | 1 | 1 | 1 |
| <i>Trichoglossus_ornatus</i>         | 1 | 1 | 1 | 1 |
| <i>Tricholaema_diademata</i>         | 1 | 1 | 1 | 1 |

|                                 |   |   |   |   |
|---------------------------------|---|---|---|---|
| <i>Tricholaema_hirsuta</i>      | 1 | 1 | 1 | 1 |
| <i>Tricholaema_lachrymosa</i>   | 1 | 1 | 1 | 1 |
| <i>Tricholaema_leucomelas</i>   | 1 | 1 | 1 | 1 |
| <i>Tricholestes_criniger</i>    | 1 | 1 | 1 | 1 |
| <i>Trichothraupis_melanops</i>  | 1 | 1 | 1 | 1 |
| <i>Triclaria_malachitacea</i>   | 1 | 1 | 1 | 1 |
| <i>Trigonoceps_occipitalis</i>  | 1 | 1 | 1 | 1 |
| <i>Tringa_brevipes</i>          | 1 | 1 | 1 | 1 |
| <i>Tringa_erythropus</i>        | 1 | 1 | 1 | 1 |
| <i>Tringa_flavipes</i>          | 1 | 1 | 1 | 1 |
| <i>Tringa_glareola</i>          | 1 | 1 | 1 | 1 |
| <i>Tringa_incanus</i>           | 1 | 1 | 1 | 1 |
| <i>Tringa_melanoleuca</i>       | 1 | 1 | 1 | 1 |
| <i>Tringa_nebularia</i>         | 1 | 1 | 1 | 1 |
| <i>Tringa_ochropus</i>          | 1 | 1 | 1 | 1 |
| <i>Tringa_semipalmatus</i>      | 1 | 1 | 1 | 1 |
| <i>Tringa_solitaria</i>         | 1 | 1 | 1 | 1 |
| <i>Tringa_stagnatilis</i>       | 1 | 1 | 1 | 1 |
| <i>Tringa_totanus</i>           | 1 | 1 | 1 | 1 |
| <i>Trochocercus_cyanomelas</i>  | 1 | 1 | 1 | 1 |
| <i>Trochocercus_nitens</i>      | 1 | 1 | 1 | 1 |
| <i>Troglodytes_aedon</i>        | 1 | 1 | 1 | 1 |
| <i>Troglodytes_cobbi</i>        | 1 | 1 | 1 | 1 |
| <i>Troglodytes_ochraceus</i>    | 1 | 1 | 1 | 1 |
| <i>Troglodytes_rufociliatus</i> | 1 | 1 | 1 | 1 |
| <i>Troglodytes_rufulus</i>      | 1 | 1 | 1 | 1 |
| <i>Troglodytes_solstitialis</i> | 1 | 1 | 1 | 1 |
| <i>Troglodytes_troglodytes</i>  | 1 | 1 | 1 | 1 |
| <i>Trogon_aurantiiventris</i>   | 1 | 1 | 1 | 1 |
| <i>Trogon_bairdii</i>           | 1 | 1 | 1 | 1 |
| <i>Trogon_citreolus</i>         | 1 | 1 | 1 | 1 |
| <i>Trogon_clathratus</i>        | 1 | 1 | 1 | 1 |
| <i>Trogon_collaris</i>          | 1 | 1 | 1 | 1 |
| <i>Trogon_comptus</i>           | 1 | 1 | 1 | 1 |
| <i>Trogon_curucui</i>           | 1 | 1 | 1 | 1 |
| <i>Trogon_elegans</i>           | 1 | 1 | 1 | 1 |
| <i>Trogon_massena</i>           | 1 | 1 | 1 | 1 |
| <i>Trogon_melanocephalus</i>    | 1 | 1 | 1 | 1 |
| <i>Trogon_melanurus</i>         | 1 | 1 | 1 | 1 |
| <i>Trogon_mexicanus</i>         | 1 | 1 | 1 | 1 |
| <i>Trogon_personatus</i>        | 1 | 1 | 1 | 1 |
| <i>Trogon_rufus</i>             | 1 | 1 | 1 | 1 |
| <i>Trogon_surrucura</i>         | 1 | 1 | 1 | 1 |
| <i>Trogon_violaceus</i>         | 1 | 1 | 1 | 1 |

|                                  |   |   |   |   |
|----------------------------------|---|---|---|---|
| <i>Trogon_viridis</i>            | 1 | 1 | 1 | 1 |
| <i>Tropicranus_albocristatus</i> | 1 | 1 | 1 | 1 |
| <i>Trugon_terrestris</i>         | 1 | 1 | 1 | 1 |
| <i>Tryngites_subruficollis</i>   | 1 | 1 | 1 | 1 |
| <i>Tumbezia_salvini</i>          | 1 | 1 | 1 | 1 |
| <i>Turacoena_manadensis</i>      | 1 | 1 | 1 | 1 |
| <i>Turdoides_bicolor</i>         | 1 | 1 | 1 | 1 |
| <i>Turdoides_gularis</i>         | 1 | 1 | 1 | 1 |
| <i>Turdoides_jardineii</i>       | 1 | 1 | 1 | 1 |
| <i>Turdoides_plebejus</i>        | 1 | 1 | 1 | 1 |
| <i>Turdoides_reinwardtii</i>     | 1 | 1 | 1 | 1 |
| <i>Turdoides_rubiginosus</i>     | 1 | 1 | 1 | 1 |
| <i>Turdus_abyssinicus</i>        | 1 | 1 | 1 | 1 |
| <i>Turdus_albicollis</i>         | 1 | 1 | 1 | 1 |
| <i>Turdus_albocinctus</i>        | 1 | 1 | 1 | 1 |
| <i>Turdus_amaurochalinus</i>     | 1 | 1 | 1 | 1 |
| <i>Turdus_assimilis</i>          | 1 | 1 | 1 | 1 |
| <i>Turdus_atrogularis</i>        | 1 | 1 | 1 | 1 |
| <i>Turdus_aurantius</i>          | 1 | 1 | 1 | 1 |
| <i>Turdus_bewsheri</i>           | 1 | 1 | 1 | 1 |
| <i>Turdus_boulboul</i>           | 1 | 1 | 1 | 1 |
| <i>Turdus_cardis</i>             | 1 | 1 | 1 | 1 |
| <i>Turdus_celaenops</i>          | 1 | 1 | 1 | 1 |
| <i>Turdus_chiguanco</i>          | 1 | 1 | 1 | 1 |
| <i>Turdus_chrysolais</i>         | 1 | 1 | 1 | 1 |
| <i>Turdus_dissimilis</i>         | 1 | 1 | 1 | 1 |
| <i>Turdus_falcklandii</i>        | 1 | 1 | 1 | 1 |
| <i>Turdus_fcae</i>               | 1 | 1 | 1 | 1 |
| <i>Turdus_fulviventris</i>       | 1 | 1 | 1 | 1 |
| <i>Turdus_fumigatus</i>          | 1 | 1 | 1 | 1 |
| <i>Turdus_fuscater</i>           | 1 | 1 | 1 | 1 |
| <i>Turdus_grayi</i>              | 1 | 1 | 1 | 1 |
| <i>Turdus_haplochrous</i>        | 1 | 1 | 1 | 1 |
| <i>Turdus_hauxwelli</i>          | 1 | 1 | 1 | 1 |
| <i>Turdus_helleri</i>            | 1 | 1 | 1 | 1 |
| <i>Turdus_hortulorum</i>         | 1 | 1 | 1 | 1 |
| <i>Turdus_ignobilis</i>          | 1 | 1 | 1 | 1 |
| <i>Turdus_iliacus</i>            | 1 | 1 | 1 | 1 |
| <i>Turdus_infuscatus</i>         | 1 | 1 | 1 | 1 |
| <i>Turdus_jamaicensis</i>        | 1 | 1 | 1 | 1 |
| <i>Turdus_kessleri</i>           | 1 | 1 | 1 | 1 |
| <i>Turdus_lawrencii</i>          | 1 | 1 | 1 | 1 |
| <i>Turdus_leucomelas</i>         | 1 | 1 | 1 | 1 |
| <i>Turdus_libonyana</i>          | 1 | 1 | 1 | 1 |

|                              |   |   |   |   |
|------------------------------|---|---|---|---|
| <i>Turdus_ludoviciae</i>     | 1 | 1 | 1 | 1 |
| <i>Turdus_maculirostris</i>  | 1 | 1 | 1 | 1 |
| <i>Turdus_mandarinus</i>     | 1 | 1 | 1 | 1 |
| <i>Turdus_maranonicus</i>    | 1 | 1 | 1 | 1 |
| <i>Turdus_maximus</i>        | 1 | 1 | 1 | 1 |
| <i>Turdus_menachensis</i>    | 1 | 1 | 1 | 1 |
| <i>Turdus_merula</i>         | 1 | 1 | 1 | 1 |
| <i>Turdus_migratorius</i>    | 1 | 1 | 1 | 1 |
| <i>Turdus_mupinensis</i>     | 1 | 1 | 1 | 1 |
| <i>Turdus_naumanni</i>       | 1 | 1 | 1 | 1 |
| <i>Turdus_nigrescens</i>     | 1 | 1 | 1 | 1 |
| <i>Turdus_nigriceps</i>      | 1 | 1 | 1 | 1 |
| <i>Turdus_niveiceps</i>      | 1 | 1 | 1 | 1 |
| <i>Turdus_nudigenis</i>      | 1 | 1 | 1 | 1 |
| <i>Turdus_obscurus</i>       | 1 | 1 | 1 | 1 |
| <i>Turdus_obsoletus</i>      | 1 | 1 | 1 | 1 |
| <i>Turdus_olivaceofuscus</i> | 1 | 1 | 1 | 1 |
| <i>Turdus_olivaceus</i>      | 1 | 1 | 1 | 1 |
| <i>Turdus_olivater</i>       | 1 | 1 | 1 | 1 |
| <i>Turdus_pallidus</i>       | 1 | 1 | 1 | 1 |
| <i>Turdus_pelios</i>         | 1 | 1 | 1 | 1 |
| <i>Turdus_philomelos</i>     | 1 | 1 | 1 | 1 |
| <i>Turdus_pilaris</i>        | 1 | 1 | 1 | 1 |
| <i>Turdus_plebejus</i>       | 1 | 1 | 1 | 1 |
| <i>Turdus_plumbeus</i>       | 1 | 1 | 1 | 1 |
| <i>Turdus_poliocephalus</i>  | 1 | 1 | 1 | 1 |
| <i>Turdus_reevei</i>         | 1 | 1 | 1 | 1 |
| <i>Turdus_roehli</i>         | 1 | 1 | 1 | 1 |
| <i>Turdus_rubrocanus</i>     | 1 | 1 | 1 | 1 |
| <i>Turdus_ruficollis</i>     | 1 | 1 | 1 | 1 |
| <i>Turdus_rufitorques</i>    | 1 | 1 | 1 | 1 |
| <i>Turdus_rufiventris</i>    | 1 | 1 | 1 | 1 |
| <i>Turdus_rufopalliatus</i>  | 1 | 1 | 1 | 1 |
| <i>Turdus_serranus</i>       | 1 | 1 | 1 | 1 |
| <i>Turdus_smithi</i>         | 1 | 1 | 1 | 1 |
| <i>Turdus_swalesi</i>        | 1 | 1 | 1 | 1 |
| <i>Turdus_tephronotus</i>    | 1 | 1 | 1 | 1 |
| <i>Turdus_torquatus</i>      | 1 | 1 | 1 | 1 |
| <i>Turdus_unicolor</i>       | 1 | 1 | 1 | 1 |
| <i>Turdus_viscivorus</i>     | 1 | 1 | 1 | 1 |
| <i>Turnix_hottentotta</i>    | 1 | 1 | 1 | 1 |
| <i>Turnix_pyrrhothorax</i>   | 1 | 1 | 1 | 1 |
| <i>Turnix_suscitator</i>     | 1 | 1 | 1 | 1 |
| <i>Turnix_sylvatica</i>      | 1 | 1 | 1 | 1 |

|                                   |   |   |   |   |
|-----------------------------------|---|---|---|---|
| <i>Turnix_tanki</i>               | 1 | 1 | 1 | 1 |
| <i>Turnix_varia</i>               | 1 | 1 | 1 | 1 |
| <i>Turtur_afer</i>                | 1 | 1 | 1 | 1 |
| <i>Turtur_brehmeri</i>            | 1 | 1 | 1 | 1 |
| <i>Turtur_chalcospilos</i>        | 1 | 1 | 1 | 1 |
| <i>Tylas_eduardi</i>              | 1 | 1 | 1 | 1 |
| <i>Tympanuchus_cupido</i>         | 1 | 1 | 1 | 1 |
| <i>Tympanuchus_pallidicinctus</i> | 1 | 1 | 1 | 1 |
| <i>Tympanuchus_phasianellus</i>   | 1 | 1 | 1 | 1 |
| <i>Tyranneutes_stolzmanni</i>     | 1 | 1 | 1 | 1 |
| <i>Tyranneutes_virescens</i>      | 1 | 1 | 1 | 1 |
| <i>Tyrannopsis_sulphurea</i>      | 1 | 1 | 1 | 1 |
| <i>Tyrannulus_elatus</i>          | 1 | 1 | 1 | 1 |
| <i>Tyrannus_couchii</i>           | 1 | 1 | 1 | 1 |
| <i>Tyrannus_crassirostris</i>     | 1 | 1 | 1 | 1 |
| <i>Tyrannus_dominicensis</i>      | 1 | 1 | 1 | 1 |
| <i>Tyrannus_forficatus</i>        | 1 | 1 | 1 | 1 |
| <i>Tyrannus_melancholicus</i>     | 1 | 1 | 1 | 1 |
| <i>Tyrannus_savana</i>            | 1 | 1 | 1 | 1 |
| <i>Tyrannus_tyrannus</i>          | 1 | 1 | 1 | 1 |
| <i>Tyrannus_verticalis</i>        | 1 | 1 | 1 | 1 |
| <i>Tyrannus_vociferans</i>        | 1 | 1 | 1 | 1 |
| <i>Tyto_alba</i>                  | 1 | 1 | 1 | 1 |
| <i>Tyto_capensis</i>              | 1 | 1 | 1 | 1 |
| <i>Tyto_glaucops</i>              | 1 | 1 | 1 | 1 |
| <i>Tyto_longimembris</i>          | 1 | 1 | 1 | 1 |
| <i>Tyto_novaehollandiae</i>       | 1 | 1 | 1 | 1 |
| <i>Tyto_tenebricosa</i>           | 1 | 1 | 1 | 1 |
| <i>Upucerthia_albigula</i>        | 1 | 1 | 1 | 1 |
| <i>Upucerthia_andaecola</i>       | 1 | 1 | 1 | 1 |
| <i>Upucerthia_certhioides</i>     | 1 | 1 | 1 | 1 |
| <i>Upucerthia_dumetaria</i>       | 1 | 1 | 1 | 1 |
| <i>Upucerthia_harterti</i>        | 1 | 1 | 1 | 1 |
| <i>Upucerthia_jelskii</i>         | 1 | 1 | 1 | 1 |
| <i>Upucerthia_ruficaudus</i>      | 1 | 1 | 1 | 1 |
| <i>Upucerthia_serrana</i>         | 1 | 1 | 1 | 1 |
| <i>Upucerthia_validirostris</i>   | 1 | 1 | 1 | 1 |
| <i>Upupa_epops</i>                | 1 | 1 | 1 | 1 |
| <i>Uraeginthus_angolensis</i>     | 1 | 1 | 1 | 1 |
| <i>Uraeginthus_bengalus</i>       | 1 | 1 | 1 | 1 |
| <i>Uraeginthus_cyanocephalus</i>  | 1 | 1 | 1 | 1 |
| <i>Uraeginthus_granatina</i>      | 1 | 1 | 1 | 1 |
| <i>Uraeginthus_ianthinogaster</i> | 1 | 1 | 1 | 1 |
| <i>Uragus_sibiricus</i>           | 1 | 1 | 1 | 1 |



|                                |   |   |   |   |
|--------------------------------|---|---|---|---|
| <i>Uratelornis_chimaera</i>    | 1 | 1 | 1 | 1 |
| <i>Uria_aalge</i>              | 1 | 1 | 1 | 1 |
| <i>Uria_lomvia</i>             | 1 | 1 | 1 | 1 |
| <i>Urochroa_bougueri</i>       | 1 | 1 | 1 | 1 |
| <i>Urocissa_erythrorhyncha</i> | 1 | 1 | 1 | 1 |
| <i>Urocissa_flavirostris</i>   | 1 | 1 | 1 | 1 |
| <i>Urocolius_indicus</i>       | 1 | 1 | 1 | 1 |
| <i>Urocolius_macrourus</i>     | 1 | 1 | 1 | 1 |
| <i>Urocynchramus_pylzowi</i>   | 1 | 1 | 1 | 1 |
| <i>Urolais_epichlorus</i>      | 1 | 1 | 1 | 1 |
| <i>Uropelia_campestris</i>     | 1 | 1 | 1 | 1 |
| <i>Uropsalis_lyra</i>          | 1 | 1 | 1 | 1 |
| <i>Uropsalis_segmentata</i>    | 1 | 1 | 1 | 1 |
| <i>Uropsila_leucogastra</i>    | 1 | 1 | 1 | 1 |
| <i>Urosphena_squameiceps</i>   | 1 | 1 | 1 | 1 |
| <i>Urosticte_benjamani</i>     | 1 | 1 | 1 | 1 |
| <i>Urosticte_ruficrissa</i>    | 1 | 1 | 1 | 1 |
| <i>Urotriorchis_macrourus</i>  | 1 | 1 | 1 | 1 |
| <i>Vanellus_chilensis</i>      | 1 | 1 | 1 | 1 |
| <i>Vanellus_miles</i>          | 1 | 1 | 1 | 1 |
| <i>Vanellus_resplendens</i>    | 1 | 1 | 1 | 1 |
| <i>Vanellus_vanellus</i>       | 1 | 1 | 1 | 1 |
| <i>Vanga_curvirostris</i>      | 1 | 1 | 1 | 1 |
| <i>Veniliornis_affinis</i>     | 1 | 1 | 1 | 1 |
| <i>Veniliornis_callonotus</i>  | 1 | 1 | 1 | 1 |
| <i>Veniliornis_cassini</i>     | 1 | 1 | 1 | 1 |
| <i>Veniliornis_chocoensis</i>  | 1 | 1 | 1 | 1 |
| <i>Veniliornis_dignus</i>      | 1 | 1 | 1 | 1 |
| <i>Veniliornis_frontalis</i>   | 1 | 1 | 1 | 1 |
| <i>Veniliornis_kirkii</i>      | 1 | 1 | 1 | 1 |
| <i>Veniliornis_nigriceps</i>   | 1 | 1 | 1 | 1 |
| <i>Veniliornis_passerinus</i>  | 1 | 1 | 1 | 1 |
| <i>Veniliornis_spilogaster</i> | 1 | 1 | 1 | 1 |
| <i>Vermivora_bachmanii</i>     | 1 | 1 | 1 | 1 |
| <i>Vermivora_chrysoptera</i>   | 1 | 1 | 1 | 1 |
| <i>Vermivora_pinus</i>         | 1 | 1 | 1 | 1 |
| <i>Vestiaria_coccinea</i>      | 1 | 1 | 1 | 1 |
| <i>Vidua_camerunensis</i>      | 1 | 1 | 1 | 1 |
| <i>Vidua_chalybeata</i>        | 1 | 1 | 1 | 1 |
| <i>Vidua_codringtoni</i>       | 1 | 1 | 1 | 1 |
| <i>Vidua_fischeri</i>          | 1 | 1 | 1 | 1 |
| <i>Vidua_hypocherina</i>       | 1 | 1 | 1 | 1 |
| <i>Vidua_interjecta</i>        | 1 | 1 | 1 | 1 |
| <i>Vidua_macroura</i>          | 1 | 1 | 1 | 1 |

|                                      |   |   |   |   |
|--------------------------------------|---|---|---|---|
| <i>Vidua_maryae</i>                  | 1 | 1 | 1 | 1 |
| <i>Vidua_nigeriae</i>                | 1 | 1 | 1 | 1 |
| <i>Vidua_obtusa</i>                  | 1 | 1 | 1 | 1 |
| <i>Vidua_orientalis</i>              | 1 | 1 | 1 | 1 |
| <i>Vidua_paradisaea</i>              | 1 | 1 | 1 | 1 |
| <i>Vidua_purpurascens</i>            | 1 | 1 | 1 | 1 |
| <i>Vidua_raricola</i>                | 1 | 1 | 1 | 1 |
| <i>Vidua_regia</i>                   | 1 | 1 | 1 | 1 |
| <i>Vidua_wilsoni</i>                 | 1 | 1 | 1 | 1 |
| <i>Vini_australis</i>                | 1 | 1 | 1 | 1 |
| <i>Vireo_altiloquus</i>              | 1 | 1 | 1 | 1 |
| <i>Vireo_atricapilla</i>             | 1 | 1 | 1 | 1 |
| <i>Vireo_bellii</i>                  | 1 | 1 | 1 | 1 |
| <i>Vireo_cassinii</i>                | 1 | 1 | 1 | 1 |
| <i>Vireo_flavifrons</i>              | 1 | 1 | 1 | 1 |
| <i>Vireo_flavoviridis</i>            | 1 | 1 | 1 | 1 |
| <i>Vireo_gilvus</i>                  | 1 | 1 | 1 | 1 |
| <i>Vireo_griseus</i>                 | 1 | 1 | 1 | 1 |
| <i>Vireo_huttoni</i>                 | 1 | 1 | 1 | 1 |
| <i>Vireo_latimeri</i>                | 1 | 1 | 1 | 1 |
| <i>Vireo_leucophrys</i>              | 1 | 1 | 1 | 1 |
| <i>Vireo_olivaceus</i>               | 1 | 1 | 1 | 1 |
| <i>Vireo_philadelphicus</i>          | 1 | 1 | 1 | 1 |
| <i>Vireo_plumbeus</i>                | 1 | 1 | 1 | 1 |
| <i>Vireo_solitarius</i>              | 1 | 1 | 1 | 1 |
| <i>Vireo_vicinior</i>                | 1 | 1 | 1 | 1 |
| <i>Vireolanius_melitophrys</i>       | 1 | 1 | 1 | 1 |
| <i>Volatinia_jacarina</i>            | 1 | 1 | 1 | 1 |
| <i>Vultur_gryphus</i>                | 1 | 1 | 1 | 1 |
| <i>Wetmorethraupis_sterrhopteron</i> | 1 | 1 | 1 | 1 |
| <i>Willisornis_poecilnotus</i>       | 1 | 1 | 1 | 1 |
| <i>Woodfordia_superciliosa</i>       | 1 | 1 | 1 | 1 |
| <i>Xanthocephalus_xanthocephalus</i> | 1 | 1 | 1 | 1 |
| <i>Xanthomixis_cinereiceps</i>       | 1 | 1 | 1 | 1 |
| <i>Xanthomixis_tenebrosus</i>        | 1 | 1 | 1 | 1 |
| <i>Xanthomixis_zosterops</i>         | 1 | 1 | 1 | 1 |
| <i>Xanthomyza_phrygia</i>            | 1 | 1 | 1 | 1 |
| <i>Xanthopsar_flavus</i>             | 1 | 1 | 1 | 1 |
| <i>Xanthotis_flaviventer</i>         | 1 | 1 | 1 | 1 |
| <i>Xema_sabini</i>                   | 1 | 1 | 1 | 1 |
| <i>Xenerpestes_singularis</i>        | 1 | 1 | 1 | 1 |
| <i>Xenodacnis_parina</i>             | 1 | 1 | 1 | 1 |
| <i>Xenoligea_montana</i>             | 1 | 1 | 1 | 1 |
| <i>Xenoperdix_udzungwensis</i>       | 1 | 1 | 1 | 1 |

|                                        |   |   |   |   |
|----------------------------------------|---|---|---|---|
| <i>Xenopipo_atronitens</i>             | 1 | 1 | 1 | 1 |
| <i>Xenopipo_unicolor</i>               | 1 | 1 | 1 | 1 |
| <i>Xenopirostris_damii</i>             | 1 | 1 | 1 | 1 |
| <i>Xenopirostris_polleni</i>           | 1 | 1 | 1 | 1 |
| <i>Xenopirostris_xenopirostris</i>     | 1 | 1 | 1 | 1 |
| <i>Xenops_milleri</i>                  | 1 | 1 | 1 | 1 |
| <i>Xenops_minutus</i>                  | 1 | 1 | 1 | 1 |
| <i>Xenops_rutilans</i>                 | 1 | 1 | 1 | 1 |
| <i>Xenopsaris_albinucha</i>            | 1 | 1 | 1 | 1 |
| <i>Xenospiza_baileyi</i>               | 1 | 1 | 1 | 1 |
| <i>Xenus_cinereus</i>                  | 1 | 1 | 1 | 1 |
| <i>Xiphidiopicus_percussus</i>         | 1 | 1 | 1 | 1 |
| <i>Xiphirhynchus_superciliaris</i>     | 1 | 1 | 1 | 1 |
| <i>Xiphocolaptes_albicollis</i>        | 1 | 1 | 1 | 1 |
| <i>Xiphocolaptes_major</i>             | 1 | 1 | 1 | 1 |
| <i>Xiphocolaptes_promeropirhynchus</i> | 1 | 1 | 1 | 1 |
| <i>Xipholena_atropurpurea</i>          | 1 | 1 | 1 | 1 |
| <i>Xipholena_punicea</i>               | 1 | 1 | 1 | 1 |
| <i>Xiphorhynchus_elegans</i>           | 1 | 1 | 1 | 1 |
| <i>Xiphorhynchus_erythropygius</i>     | 1 | 1 | 1 | 1 |
| <i>Xiphorhynchus_flavigaster</i>       | 1 | 1 | 1 | 1 |
| <i>Xiphorhynchus_fuscus</i>            | 1 | 1 | 1 | 1 |
| <i>Xiphorhynchus_guttatus</i>          | 1 | 1 | 1 | 1 |
| <i>Xiphorhynchus_lachrymosus</i>       | 1 | 1 | 1 | 1 |
| <i>Xiphorhynchus_obsoletus</i>         | 1 | 1 | 1 | 1 |
| <i>Xiphorhynchus_ocellatus</i>         | 1 | 1 | 1 | 1 |
| <i>Xiphorhynchus_pardalotus</i>        | 1 | 1 | 1 | 1 |
| <i>Xiphorhynchus_picus</i>             | 1 | 1 | 1 | 1 |
| <i>Xiphorhynchus_spixii</i>            | 1 | 1 | 1 | 1 |
| <i>Xiphorhynchus_susurrans</i>         | 1 | 1 | 1 | 1 |
| <i>Xiphorhynchus_triangularis</i>      | 1 | 1 | 1 | 1 |
| <i>Xolmis_cinereus</i>                 | 1 | 1 | 1 | 1 |
| <i>Xolmis_coronatus</i>                | 1 | 1 | 1 | 1 |
| <i>Xolmis_irupero</i>                  | 1 | 1 | 1 | 1 |
| <i>Xolmis_pyrope</i>                   | 1 | 1 | 1 | 1 |
| <i>Xolmis_rubetra</i>                  | 1 | 1 | 1 | 1 |
| <i>Xolmis_velatus</i>                  | 1 | 1 | 1 | 1 |
| <i>Yuhina_bakeri</i>                   | 1 | 1 | 1 | 1 |
| <i>Yuhina_brunneiceps</i>              | 1 | 1 | 1 | 1 |
| <i>Yuhina_castaniceps</i>              | 1 | 1 | 1 | 1 |
| <i>Yuhina_diademata</i>                | 1 | 1 | 1 | 1 |
| <i>Yuhina_everetti</i>                 | 1 | 1 | 1 | 1 |
| <i>Yuhina_flavicollis</i>              | 1 | 1 | 1 | 1 |
| <i>Yuhina_gularis</i>                  | 1 | 1 | 1 | 1 |

|                                   |   |   |   |   |
|-----------------------------------|---|---|---|---|
| <i>Yuhina_nigrimenta</i>          | 1 | 1 | 1 | 1 |
| <i>Yuhina_occipitalis</i>         | 1 | 1 | 1 | 1 |
| <i>Zaratornis_stresemanni</i>     | 1 | 1 | 1 | 1 |
| <i>Zavattariornis_stresemanni</i> | 1 | 1 | 1 | 1 |
| <i>Zebrilus_undulatus</i>         | 1 | 1 | 1 | 1 |
| <i>Zeledonia_coronata</i>         | 1 | 1 | 1 | 1 |
| <i>Zenaida_asiatica</i>           | 1 | 1 | 1 | 1 |
| <i>Zenaida_auriculata</i>         | 1 | 1 | 1 | 1 |
| <i>Zenaida_aurita</i>             | 1 | 1 | 1 | 1 |
| <i>Zenaida_galapagoensis</i>      | 1 | 1 | 1 | 1 |
| <i>Zenaida_graysoni</i>           | 1 | 1 | 1 | 1 |
| <i>Zenaida_macroura</i>           | 1 | 1 | 1 | 1 |
| <i>Zenaida_meloda</i>             | 1 | 1 | 1 | 1 |
| <i>Zimmerius_acer</i>             | 1 | 1 | 1 | 1 |
| <i>Zimmerius_albigularis</i>      | 1 | 1 | 1 | 1 |
| <i>Zimmerius_bolivianus</i>       | 1 | 1 | 1 | 1 |
| <i>Zimmerius_chrysops</i>         | 1 | 1 | 1 | 1 |
| <i>Zimmerius_gracilipes</i>       | 1 | 1 | 1 | 1 |
| <i>Zimmerius_vilissimus</i>       | 1 | 1 | 1 | 1 |
| <i>Zimmerius_viridiflavus</i>     | 1 | 1 | 1 | 1 |
| <i>Zonotrichia_albicollis</i>     | 1 | 1 | 1 | 1 |
| <i>Zonotrichia_atricapilla</i>    | 1 | 1 | 1 | 1 |
| <i>Zonotrichia_capensis</i>       | 1 | 1 | 1 | 1 |
| <i>Zonotrichia_leucophrys</i>     | 1 | 1 | 1 | 1 |
| <i>Zonotrichia_querula</i>        | 1 | 1 | 1 | 1 |
| <i>Zoothera_andromedae</i>        | 1 | 1 | 1 | 1 |
| <i>Zoothera_camaronensis</i>      | 1 | 1 | 1 | 1 |
| <i>Zoothera_cinerea</i>           | 1 | 1 | 1 | 1 |
| <i>Zoothera_citrina</i>           | 1 | 1 | 1 | 1 |
| <i>Zoothera_crossleyi</i>         | 1 | 1 | 1 | 1 |
| <i>Zoothera_dauma</i>             | 1 | 1 | 1 | 1 |
| <i>Zoothera_dixonii</i>           | 1 | 1 | 1 | 1 |
| <i>Zoothera_dohertyi</i>          | 1 | 1 | 1 | 1 |
| <i>Zoothera_erythronota</i>       | 1 | 1 | 1 | 1 |
| <i>Zoothera_gurneyi</i>           | 1 | 1 | 1 | 1 |
| <i>Zoothera_guttata</i>           | 1 | 1 | 1 | 1 |
| <i>Zoothera_heinei</i>            | 1 | 1 | 1 | 1 |
| <i>Zoothera_interpres</i>         | 1 | 1 | 1 | 1 |
| <i>Zoothera_lunulata</i>          | 1 | 1 | 1 | 1 |
| <i>Zoothera_marginata</i>         | 1 | 1 | 1 | 1 |
| <i>Zoothera_mollissima</i>        | 1 | 1 | 1 | 1 |
| <i>Zoothera_monticola</i>         | 1 | 1 | 1 | 1 |
| <i>Zoothera_oberlaenderi</i>      | 1 | 1 | 1 | 1 |
| <i>Zoothera_peronii</i>           | 1 | 1 | 1 | 1 |

|                                  |   |   |   |   |
|----------------------------------|---|---|---|---|
| <i>Zoothera_piaggiae</i>         | 1 | 1 | 1 | 1 |
| <i>Zoothera_pinicola</i>         | 1 | 1 | 1 | 1 |
| <i>Zoothera_princei</i>          | 1 | 1 | 1 | 1 |
| <i>Zoothera_schistacea</i>       | 1 | 1 | 1 | 1 |
| <i>Zoothera_sibirica</i>         | 1 | 1 | 1 | 1 |
| <i>Zoothera_spiloptera</i>       | 1 | 1 | 1 | 1 |
| <i>Zoothera_talaseae</i>         | 1 | 1 | 1 | 1 |
| <i>Zoothera_tanganjicae</i>      | 1 | 1 | 1 | 1 |
| <i>Zoothera_wardii</i>           | 1 | 1 | 1 | 1 |
| <i>Zosterops_abyssinicus</i>     | 1 | 1 | 1 | 1 |
| <i>Zosterops_atricapilla</i>     | 1 | 1 | 1 | 1 |
| <i>Zosterops_atrifrons</i>       | 1 | 1 | 1 | 1 |
| <i>Zosterops_borbonicus</i>      | 1 | 1 | 1 | 1 |
| <i>Zosterops_capensis</i>        | 1 | 1 | 1 | 1 |
| <i>Zosterops_chloris</i>         | 1 | 1 | 1 | 1 |
| <i>Zosterops_cinerea</i>         | 1 | 1 | 1 | 1 |
| <i>Zosterops_citrinellus</i>     | 1 | 1 | 1 | 1 |
| <i>Zosterops_conspicillatus</i>  | 1 | 1 | 1 | 1 |
| <i>Zosterops_erythropleurus</i>  | 1 | 1 | 1 | 1 |
| <i>Zosterops_flavifrons</i>      | 1 | 1 | 1 | 1 |
| <i>Zosterops_fuscicapilla</i>    | 1 | 1 | 1 | 1 |
| <i>Zosterops_griseotinctus</i>   | 1 | 1 | 1 | 1 |
| <i>Zosterops_griseovirescens</i> | 1 | 1 | 1 | 1 |
| <i>Zosterops_inornatus</i>       | 1 | 1 | 1 | 1 |
| <i>Zosterops_japonicus</i>       | 1 | 1 | 1 | 1 |
| <i>Zosterops_kikuyuensis</i>     | 1 | 1 | 1 | 1 |
| <i>Zosterops_kulambangrae</i>    | 1 | 1 | 1 | 1 |
| <i>Zosterops_lateralis</i>       | 1 | 1 | 1 | 1 |
| <i>Zosterops_luteirostris</i>    | 1 | 1 | 1 | 1 |
| <i>Zosterops_luteus</i>          | 1 | 1 | 1 | 1 |
| <i>Zosterops_maderaspatanus</i>  | 1 | 1 | 1 | 1 |
| <i>Zosterops_metcalfii</i>       | 1 | 1 | 1 | 1 |
| <i>Zosterops_modestus</i>        | 1 | 1 | 1 | 1 |
| <i>Zosterops_montanus</i>        | 1 | 1 | 1 | 1 |
| <i>Zosterops_mouroniensis</i>    | 1 | 1 | 1 | 1 |
| <i>Zosterops_murphyi</i>         | 1 | 1 | 1 | 1 |
| <i>Zosterops_nigrorum</i>        | 1 | 1 | 1 | 1 |
| <i>Zosterops_oleagineus</i>      | 1 | 1 | 1 | 1 |
| <i>Zosterops_olivaceus</i>       | 1 | 1 | 1 | 1 |
| <i>Zosterops_pallidus</i>        | 1 | 1 | 1 | 1 |
| <i>Zosterops_palpebrosus</i>     | 1 | 1 | 1 | 1 |
| <i>Zosterops_poliogastrus</i>    | 1 | 1 | 1 | 1 |
| <i>Zosterops_rendovae</i>        | 1 | 1 | 1 | 1 |
| <i>Zosterops_rennellianus</i>    | 1 | 1 | 1 | 1 |

|                               |   |   |   |   |
|-------------------------------|---|---|---|---|
| <i>Zosterops_rotensis</i>     | 1 | 1 | 1 | 1 |
| <i>Zosterops_senegalensis</i> | 1 | 1 | 1 | 1 |
| <i>Zosterops_splendidus</i>   | 1 | 1 | 1 | 1 |
| <i>Zosterops_stresemanni</i>  | 1 | 1 | 1 | 1 |
| <i>Zosterops_ugiensis</i>     | 1 | 1 | 1 | 1 |
| <i>Zosterops_vellalavella</i> | 1 | 1 | 1 | 1 |
| <i>Zosterops_virens</i>       | 1 | 1 | 1 | 1 |
| <i>Zosterops_wallacei</i>     | 1 | 1 | 1 | 1 |

## References for SI Appendix

1. Li JL, Wu XC, & Zhang FC (2008) *The Chinese fossil reptiles and their kin* (Science Press, Beijing) 2nd Ed.
2. Wang Y, *et al.* (2017) A previously undescribed specimen reveals new information on the dentition of *Sapeornis chaoyangensis*. *Cretaceous Research* 74:1-10.
3. Balanoff AM & Norell MA (2012) Osteology of *Khaan mckennai* (Oviraptorosauria: Theropoda). *Bulletin of the American Museum of Natural History* (372):1-77.
4. Wang S, *et al.* (2017) Extreme ontogenetic changes in a ceratosaurian theropod. *Current Biology* 27:144-147.
5. Hamburger V & Hamilton HL (1951) A series of normal stages in the development of the chick embryo. *Journal of morphology* 88(1):49-92.
6. Wu P, Jiang TX, Suksaweang S, Widelitz RB, & Chuong C-M (2004) Molecular shaping of the beak. *Science* 305(5689):1465-1466.
7. Jiang TX, Stott S, Widelitz RB, & Chuong C-M (1998) Current methods in the study of avian skin appendages. *Molecular basis of epithelial appendage morphology*, ed Chuong CM (Landes Company, Austin), pp 395-408.
8. Wu P, Jiang TX, Shen JY, Widelitz RB, & Chuong C-M (2006) Morphoregulation of avian beaks: Comparative mapping of growth zone activities and morphological evolution. *Developmental Dynamics* 235(5):1400-1412.
9. Whitbread LA, Gregg K, & Rogers GE (1991) The structure and expression of a gene encoding chick claw keratin. *Gene* 101(2):223-229.
10. Hilton EJ, Grande L, & Bemis WE (2011) Skeletal anatomy of the shortnose sturgeon, *Acipenser brevirostrum* Lesueur, 1818, and the systematics of sturgeons (Acipenseriformes, Acipenseridae). *Fieldiana Life and Earth Sciences*:1-168.
11. Smith MM, *et al.* (2015) Making teeth to order: Conserved genes reveal an ancient molecular pattern in paddlefish (Actinopterygii). *Proceedings of the Royal Society B: Biological Sciences* 282(1805):20142700.
12. Matsuoka M (1997) Osteological development in the Japanese sardine, *Sardinops melanostictus*. *Ichthyological Research* 44(2):275.
13. Miller RR (1960) Systematics and biology of the gizzard shad (*Dorosoma cepedianum*) and related fishes. *Fisheries* 1(2):371-388.
14. Heinrichs SM (1982) Ontogenetic changes in the digestive tract of the larval gizzard shad, *Dorosoma cepedianum*. *Transactions of the American Microscopical Society* 101(2):262-275.
15. Bagarinao TU (1991) *Biology of milkfish (Chanos chanos Forsskal)* (SEAFDEC Aquaculture Department).
16. Huysseune A & Sire JY (1997) Structure and development of teeth in three armoured catfish, *Corydoras aeneus*, *C. arcuatus* and *Hoplosternum littorale* (Siluriformes, Callichthyidae). *Acta Zoologica* 78(1):69-84.
17. Golubtsov AS, Moots KA, & Dzerjinskii KF (2004) Dentition in the African catfishes *Andersonia* (Amphiliidae) and *Siluranodon* (Schilbeidae) previously considered toothless. *Journal of Fish Biology* 64(1):146-158.
18. Sabaj MH (2005) Taxonomic assessment of *Leptodoras* (Siluriformes: Doradidae) with descriptions of three new species. *Neotropical Ichthyology* 3(4):637-678.
19. Kakizawa Y & Meenakarn W (2003) Histogenesis and disappearance of the teeth of the Mekong

- giant catfish, *Pangasianodon gigas* (Teleostei). *Journal of Oral Science* 45(4):213-221.
20. Cameron J (1959) The larval and post-larval stages of *Gymnammodytes semisquamatus* (Jourdain). *Journal of the Marine Biological Association of the United Kingdom* 38(1):17-25.
  21. Fierstine HL (2006) Fossil history of billfishes (Xiphoidei). *Bulletin of Marine Science* 79(3):433-453.
  22. Nakamura H, *et al.* (1951) Notes on the life-history of the sword-fish, *Xiphias gladius* LINNAEUS. *Japanese Journal of Ichthyology* 1(4):264-271.
  23. Aguirre H (1997) Presence of dentition in the premaxilla of juvenile *Mullus barbatus* and *M.surmuletus*. *Journal of Fish Biology* 51:1186-1191.
  24. Franz-Odenaal TA & Adriaens D (2014) Comparative developmental osteology of the seahorse skeleton reveals heterochrony amongst *Hippocampus* sp. and progressive caudal fin loss. *EvoDevo* 5(1):45.
  25. Gardner JD (2003) Revision of *Habrosaurus* Gilmore (Caudata; Sirenidae) and relationships among sirenid salamanders. *Palaeontology* 46(6):1089-1122.
  26. Rose CS (2003) The developmental morphology of salamander skulls. *Amphibian biology* 5:1684-1781.
  27. Pryor GS, German DP, & Bjorndal KA (2006) Gastrointestinal fermentation in greater sirens (*Siren lacertina*). *Journal of Herpetology* 40(1):112-117.
  28. Trueb L & Gans C (1983) Feeding specializations of the Mexican burrowing toad, *Rhinophrynus dorsalis* (Anura: Rhinophrynidae). *Journal of Zoology* 199(2):189-208.
  29. Orton G (1948) The tadpole of *Rhinophrynus dorsalis*. *Occasional Papers of the Museum of Zoology, University of Michigan* (472):1-7.
  30. Henrici AC (1998) A new pipoid anuran from the Late Jurassic Morrison Formation at Dinosaur National Monument, Utah. *Journal of Vertebrate Paleontology* 18(2):321-332.
  31. Davit-Béal T, Chisaka H, Delgado S, & Sire J-Y (2007) Amphibian teeth: Current knowledge, unanswered questions, and some directions for future research. *Biological Reviews* 82(1):49-81.
  32. Davit-Béal T, Tucker AS, & Sire J-Y (2009) Loss of teeth and enamel in tetrapods: Fossil record, genetic data and morphological adaptations. *Journal of Anatomy* 214(4):477-501.
  33. Wiens JJ (1993) Systematics of the leptodactylid frog genus *Telmatobius* in the Andes of northern Peru. *Occasional Papers of the Museum of Natural History, the University of Kansas* 162:1-7.
  34. Barrionuevo JS (2017) Frogs at the summits: Phylogeny of the Andean frogs of the genus *Telmatobius* (Anura, Telmatobiidae) based on phenotypic characters. *Cladistics* 33(1):41-68.
  35. Rich TH, *et al.* (2016) The mandible and dentition of the Early Cretaceous monotreme *Teinolophos trusleri*. *Alcheringa: An Australasian Journal of Palaeontology* 40(4):475-501.
  36. Hill JP & de Beer GR (1950) Development of the monotremata.—PART VII. The development and structure of the egg-tooth and the caruncle in the monotremes and on the occurrence of vestiges of the egg-tooth and caruncle in marsupials. *The Transactions of the Zoological Society of London* 26(6):503-544.
  37. Manger PR, Hall LS, & Pettigrew JD (1998) The development of the external features of the platypus (*Ornithorhynchus anatinus*). *Philosophical Transactions of the Royal Society of London. Series B: Biological Sciences* 353(1372):1115-1125.
  38. Werneburg I & Sánchez-Villagra MR (2011) The early development of the echidna, *Tachyglossus aculeatus* (Mammalia: Monotremata), and patterns of mammalian development.



- Acta Zoologica* 92(1):75-88.
39. Musser AM & Archer M (1998) New information about the skull and dentary of the Miocene platypus *Obdurodon dicksoni*, and a discussion of ornithorhynchid relationships. *Philosophical Transactions of the Royal Society of London. Series B: Biological Sciences* 353(1372):1063-1079.
  40. Gaudin TJ, Emry RJ, & Wible JR (2009) The phylogeny of living and extinct pangolins (Mammalia, Pholidota) and associated taxa: A morphology based analysis. *Journal of Mammalian Evolution* 16(4):235.
  41. Simpson GG (1881) Metacheiromys and the Edentata. *Bulletin of the American Museum of Natural History* 59:1-295.
  42. Hatt RT, Lang H, & Chapin JP (1934) The pangolins and aard-varks collected by the American Museum Congo expedition. *Scientific Results of the Congo Expedition Mammalogy* 15(643-691).
  43. Tims HW (1908) Tooth-vestiges and associated mouth parts in the *Manidae*. *J Anat Physiol* 42(Pt 4):375-387.
  44. Thewissen JGM, *et al.* (2017) Evolutionary aspects of the development of teeth and baleen in the bowhead whale. *Journal of Anatomy* 230(4):549-566.
  45. Ishikawa H & Amasaki H (1995) Development and physiological degradation of tooth buds and development of rudiment of baleen plate in southern minke whale (*Balaenoptera acutorostrata*). *Journal of Veterinary Medical Science* 57(4):665-670.
  46. Boessenecker RW & Fordyce RE (2015) Anatomy, feeding ecology, and ontogeny of a transitional baleen whale: A new genus and species of Eomysticetidae (Mammalia: Cetacea) from the Oligocene of New Zealand. *PeerJ* 3:e1129.
  47. Boessenecker RW & Fordyce RE (2015) A new genus and species of eomysticetid (Cetacea: Mysticeti) and a reinterpretation of '*Mauicetus*' *lophocephalus* Marples, 1956: Transitional baleen whales from the upper Oligocene of New Zealand. *Zoological Journal of the Linnean Society* 175(3):607-660.
  48. Boschma H (1951) Rows of small teeth in ziphioid whales. *Zoologische Mededelingen* 31(14):139-148.
  49. Nweeia MT, *et al.* (2012) Vestigial tooth anatomy and tusk nomenclature for *Monodon monoceros*. *The Anatomical Record: Advances in Integrative Anatomy and Evolutionary Biology* 295(6):1006-1016.
  50. Nicholls EL & Manabe M (2004) Giant ichthyosaurs of the Triassic—a new species of *Shonisaurus* from the Pardonet Formation (Norian: Late Triassic) of British Columbia. *Journal of Vertebrate Paleontology* 24(4):838-849.
  51. Ji C, *et al.* (2013) A new juvenile specimen of *Guanlingsaurus* (Ichthyosauria, Shastasauridae) from the Upper Triassic of southwestern China. *Journal of Vertebrate Paleontology* 33(2):340-348.
  52. Martin JE, Fischer V, Vincent P, & Suan G (2012) A longirostrine Temnodontosaurus (Ichthyosauria) with comments on Early Jurassic ichthyosaur niche partitioning and disparity. *Palaeontology* 55:995-1005.
  53. Dick DG & Maxwell EE (2015) Ontogenetic tooth reduction in *Stenopterygius quadriscissus* (Reptilia: Ichthyosauria): Negative allometry, changes in growth rate, and early senescence of the dental lamina. *PloS one* 10(11):e0141904.

54. Zhao LJ, Sato T, Liu J, Li C, & Wu XC (2010) A new skeleton of *Miodontosaurus brevis* (Diapsida: Thalattosauria) with a further study of the taxon. *Vertebrata Palasiatica* 48:1-10.
55. Müller J, Renesto S, & Evans SE (2005) The marine diapsid reptile *Endennasaurus* from the Upper Triassic of Italy. *Palaeontology* 48(1):15-30.
56. Jiang DY, Maisch MW, Sun YL, Matzke AT, & Hao WC (2004) A new species of *Xinpusaurus* (Thalattosauria) from the Upper Triassic of China. *Journal of Vertebrate Paleontology* 24(1):80-88.
57. Rieppel FO (2002) Feeding mechanics in Triassic stem-group sauropterygians: The anatomy of a successful invasion of Mesozoic seas. *Zoological Journal of the Linnean Society* 135(1):33-63.
58. Neenan JM, Li C, Rieppel O, & Scheyer TM (2015) The cranial anatomy of Chinese placodonts and the phylogeny of Placodontia (Diapsida: Sauropterygia). *Zoological Journal of the Linnean Society* 175(2):415-428.
59. List JC (1966) Comparative osteology of the snake families Typhlopidae and Leptotyphlopidae. *Illinois biological monographs* 36:104-106.
60. Rieppel O, Kley NJ, & Maisano JA (2009) Morphology of the skull of the white-nosed blindsnake, *Liotyphlops albirostris* (Scolophorida: Anomalepididae). *Journal of morphology* 270(5):536-557.
61. Ishiyama M & Ogawa T (1981) Devolutive dentitions of the sea snake, *Emydocephalus ijimae*. *Japanese Journal of Oral Biology* 23(4):691-697.
62. Deufel A & Cundall D (2003) Feeding in *Atractaspis* (Serpentes: Atractaspididae): A study in conflicting functional constraints. *Zoology* 106(1):43-61.
63. Gans C & Oshima M (1952) Adaptations for egg eating in the snake *Elaphe climacophora* (Boie). *American Museum novitates* 1571:1-16.
64. Gartner GEA & Greene HW (2008) Adaptation in the African egg-eating snake: A comparative approach to a classic study in evolutionary functional morphology. *Journal of Zoology* 275(4):368-374.
65. Pringle JA (1954) The cranial development of certain South African snakes and the relationship of these groups. *Proceedings of the Zoological Society of London* 123(4):813-866.
66. Visser J (1981) Tooth counts for *Dasypeltis* (Serpentes: Dasypeltinae). *The Journal of the Herpetological Association of Africa* 25(1):13-14.
67. Webb JK & Shine R (1994) Feeding habits and reproductive biology of australian pygopodid lizards of the genus *Aprasia*. *Copeia* 2:390-398.
68. Greer AE & Haacke WD (1982) A new and unusual species of *Lygosoma* (Lacertilia: Scincidae) from the Horn of Africa. *Annals of the Transvaal Museum* 33(10):153-164.
69. Gao KQ & Cheng ZW (1999) A new lizard from the Lower Cretaceous of Shandong, China. *Journal of Vertebrate Paleontology* 19(3):456-465.
70. Ikeda T, Ota H, & Saegusa H (2015) A new fossil lizard from the Lower Cretaceous Sasayama Group of Hyogo Prefecture, western Honshu, Japan. *Journal of Vertebrate Paleontology* 35(1):e885032.
71. Gaffney ES (1990) The comparative osteology of the Triassic turtle *Proganochelys*. *Bulletin of the American Museum of Natural History* 194:5-263.
72. Kordikova E (2002) Comparative morphology of the palate dentition in *Proganochelys quenstedti* BAUR 1887 from the Upper Triassic of Germany and Chelonian ancestry. *Neues*

- Jahrbuch für Geologie und Paläontologie - Abhandlungen* 225(2):195-249.
73. Lyson TR, Bever GS, Bhullar B-AS, Joyce WG, & Gauthier JA (2010) Transitional fossils and the origin of turtles. *Biology Letters* 6:830-833.
  74. Schoch RR & Sues H-D (2015) A Middle Triassic stem-turtle and the evolution of the turtle body plan. *Nature* 523(7562):584-587.
  75. Colbert EH & Olsen PE (2001) A new and unusual aquatic reptile from the Lockatong Formation of New Jersey (Late Triassic, Newark Supergroup). *American Museum Novitates* 3334:1-24.
  76. Nesbitt SJ (2011) The early evolution of archosaurs: Relationships and the origin of major clades. *Bulletin of the American Museum of Natural History* (352):1-288.
  77. Nesbitt SJ (2007) The anatomy of *Effigia Okeeffeae* (Archosauria, Suchia), theropod-like convergence, and the distribution of related taxa. *Bulletin of the American Museum of Natural History* 302:1-84.
  78. Nesbitt SJ, Liu J, & Li C (2011) The oldest archosaur: A sail-backed suchian from the Heshanggou Formation (Early Triassic: Olenekian) of China. *Earth and Environmental Science Transactions of the Royal Society of Edinburgh* 101:271-284.
  79. Parker WG & Nesbitt SJ (2013) Cranial remains of *Poposaurus gracilis* (Pseudosuchia: Poposauroida) from the Upper Triassic, the distribution of the taxon, and its implications for poposauroid evolution. *Geological Society London Special Publications* 379:503-523.
  80. Göhlich UB, Chiappe LM, Clark JM, & Sues H-D (2005) The systematic position of the Late Jurassic alleged dinosaur *Macelognathus* (Crocodylomorpha: Sphenosuchia). *Canadian Journal of Earth Sciences* 42(3):307-321.
  81. Wu XC, Sues H-D, & Dong ZM (1997) *Sichuanosuchus shuhanensis*, a new ? Early Cretaceous protosuchian (Archosauria: Crocodyliformes) from Sichuan (China), and the monophyly of Protosuchia. *Journal of Vertebrate Paleontology* 17(1):89-103.
  82. Peng GZ (1996) Late Jurassic protosuchian *Sichuanosuchus huidongensis* (Archosauria: Crocodyliformes) from Zigong, Sichuan, China. *Vertebrata Palasiatica* 34(4):269-278.
  83. Clark JM (2011) A new shartegosuchid crocodyliform from the Upper Jurassic Morrison Formation of western Colorado. *Zoological Journal of the Linnean Society* 163:S152-S172.
  84. Pol D (2003) New remains of *Sphagesaurus huenei* (Crocodylomorpha: Mesoeucrocodylia) from the Late Cretaceous of Brazil. *Journal of Vertebrate Paleontology* 23(4):817-831.
  85. Sereno PC & Larsson HCE (2009) Cretaceous Crocodyliforms from the Sahara. *Zookeys* (28):1-143.
  86. Stecher R (2008) A new Triassic pterosaur from Switzerland (Central Austroalpine, Grisons), *Raeticodactylus filisurensis* gen. et sp. nov. *Swiss Journal of Geosciences* 101(1):185-201.
  87. Andres B, Clark JM, & Xu X (2014) The earliest Pterodactyloid and the origin of the group. *Current Biology* 24(9):1011-1016.
  88. Wellnhofer P (1975) Die Rhamphorhynchoidea (Pterosauria) der Oberjura-Plattenkalke Süddeutschlands. *Palaeontographica Abteilung A*:1-33.
  89. Frey E, Tischlinger H, Buchy M-C, & Martill DM (2003) New specimens of Pterosauria (Reptilia) with soft parts with implications for pterosaurian anatomy and locomotion. *Geological Society, London, Special Publications* 217(1):233-266.
  90. Dong ZM (1982) A new pterosaur (*Huanhepterus quingyangensis* gen. et sp. nov.) from Ordos, China. *Vertebrata Palasiatica* 20(2):115-121.

91. Bennett SC (2013) The morphology and taxonomy of the pterosaur *Cycnorhamphus*. *Neues Jahrbuch fuer Geologie und Palaeontologie Abhandlungen* 267(1):23-41.
92. Bennett SC (2017) Waves of bone deposition on the rostrum of the pterosaur *Pteranodon*. *Geological Society London Special Publications* 455:SP455.452.
93. Martill DM (2014) A functional odontoid in the dentary of the Early Cretaceous pterosaur *Istiodactylus latidens*: Implications for feeding. *Cretaceous Research* 47:56-65.
94. Young CC (1964) On a new pterosaurian from Sinkiang, China. *Vertebrata Palasiatica* 8(3):221-256.
95. Maisch MW, Matzke AT, & Sun G (2004) A new dsungaripteroid pterosaur from the Lower Cretaceous of the southern Junggar Basin, northwest China. *Cretaceous Research* 25(5):625-634.
96. Kellner AWA (2003) Pterosaur phylogeny and comments on the evolutionary history of the group. *Evolution and Palaeobiology of Pterosaurs*, eds Buffetaut E & Mazin J-M (Geological Society of London, London), Vol Special Publications 217, pp 105-137.
97. Unwin DM (2003) On the phylogeny and evolutionary history of pterosaurs. *Evolution and Palaeobiology of Pterosaurs*, eds Buffetaut E & Mazin J-M (Geological Society of London, London), Vol Special Publications 217, pp 139-190.
98. Holliday CM & Nesbitt SJ (2013) Morphology and diversity of the mandibular symphysis of archosauriforms. *Anatomy, Phylogeny and Palaeobiology of Early Archosaurs and Their Kin* 379:555-571.
99. Bittencourt JS, Arcucci AB, Marsicano CA, & Langer MC (2015) Osteology of the Middle Triassic archosaur *Lewisuchus admixtus* Romer (Chañares Formation, Argentina), its inclusivity, and relationships amongst early dinosauriforms. *Journal of Systematic Palaeontology* 13(3):189-219.
100. Nesbitt SJ, *et al.* (2017) The earliest bird-line archosaurs and the assembly of the dinosaur body plan. *Nature* 544(7651):484-487.
101. Nabavizadeh A & Weishampel DB (2016) The predentary bone and its significance in the evolution of feeding mechanisms in ornithischian dinosaurs. *The Anatomical Record* 299(10):1358-1388.
102. Butler RJ, Upchurch P, & Norman DB (2008) The phylogeny of the ornithischian dinosaurs. *Journal of Systematic Palaeontology* 6(1):1-40.
103. Apesteguía S (2004) *Bonitasaura salgadoi* gen. et sp. nov.: A beaked sauropod from the Late Cretaceous of Patagonia. *Die Naturwissenschaften* 91(10):493-497.
104. Gallina PA & Apesteguía S (2011) Cranial anatomy and phylogenetic position of the titanosaurian sauropod *Bonitasaura salgadoi*. *Acta Palaeontologica Polonica* 56(1):45-60.
105. Sereno PC, *et al.* (2007) Structural extremes in a Cretaceous dinosaur. *PloS one* 2(11):e1230.
106. Hieronymus TL, Witmer LM, Tanke DH, & Currie PJ (2009) The facial integument of centrosaurine ceratopsids: Morphological and histological correlates of novel skin structures. *The Anatomical Record: Advances in Integrative Anatomy and Evolutionary Biology* 292(9):1370-1396.
107. Hieronymus TL & Witmer LM (2010) Homology and evolution of avian compound rhamphothecae. *Auk* 127(3):590-604.
108. Whitlock JA, Wilson JA, & Lamanna MC (2010) Description of a nearly complete juvenile skull of *Diplodocus* (Sauropoda: Diplodocoidea) from the Late Jurassic of North America.

- Journal of Vertebrate Paleontology* 30(2):442-457.
109. Perez-Moreno BP, Sanz JL, Sudre J, & Sige B (1994) A theropod dinosaur from the Lower Cretaceous of southern France. *Revue de Paleobiologie Volume Special 7*:173-188.
  110. Norell MA, Makovicky PJ, & Currie PJ (2001) The beaks of ostrich dinosaurs. *Nature* 412:873-874.
  111. Choiniere JN, Forster CA, & de Klerk WJ (2012) New information on *Nqwebasaurus thwazi*, A coelurosaurian theropod from the Early Cretaceous Kirkwood Formation in South Africa. *Journal of African Earth Sciences* 71–72:1-17.
  112. Kobayashi Y & Barsbold R (2005) Anatomy of *Harpymimus okladnikovi* Barsbold and Perle 1984 (Dinosauria, Theropoda) of Mongolia. *The Carnivorous Dinosaurs*, ed Carpenter K (Indiana University Press, Indianapolis), pp 97-126.
  113. De Klerk WJ, Forster CA, Sampson SD, Chinsamy A, & Ross CF (2000) A new coelurosaurian dinosaur from the Early Cretaceous of South Africa. *Journal of Vertebrate Paleontology* 20(2):324-332.
  114. Ji Q, *et al.* (2003) An early ostrich dinosaur and implications for ornithomimosaur phylogeny. *American Museum Novitates* (3420):1-19.
  115. Kobayashi Y, *et al.* (1999) Palaeobiology: Herbivorous diet in an ornithomimid dinosaur. *Nature* 402(6761):480-481.
  116. Lee Y-N, *et al.* (2014) Resolving the long-standing enigmas of a giant ornithomimosaur *Deinocheirus mirificus*. *Nature* 515(7526):257-260.
  117. Makovicky PJ, Kobayashi Y, & Currie PJ (2004) Ornithomimosauria. *Dinosauria, 2nd Edition*:137-150.
  118. Xu X, Zhao XJ, & Clark JM (2001) A new therizinosaur from the Lower Jurassic Lower Lufeng Formation of Yunnan, China. *Journal of Vertebrate Paleontology* 21(3):477-483.
  119. Zanno LE, Tsogtbaatar K, Chinzorig T, & Gates TA (2016) Specializations of the mandibular anatomy and dentition of *Segnosaurus galbinensis* (Theropoda: Therizinosauria). *PeerJ* 4:e1885.
  120. Clark JM, Maryanska T, & Barsbold R (2004) Therizinosaurioidea. *Dinosauria, 2nd Edition*:151-164.
  121. Ji Q, Lü JC, Wei XF, & Wang XR (2012) A new oviraptorosaur from the Yixian Formation of Jianchang, Western Liaoning Province, China. *Geological Bulletin of China* 31(12):2102-2107.
  122. Balanoff AM, Xu X, Kobayashi Y, Matsufune Y, & Norell MA (2009) Cranial osteology of the theropod dinosaur *Incisivosaurus gauthieri* (Theropoda: Oviraptorosauria). *American Museum Novitates*:1-35.
  123. Osmólska H, Currie PJ, & Barsbold R (2004) Oviraptorosauria. *The Dinosauria*, eds Weishampel DB, Dodson P, & Osmólska H (University of California Press, Berkeley), 2<sup>nd</sup> Ed.
  124. Zhou ZH, Wang XL, Zhang FC, & Xu X (2000) Important features of *Caudipteryx*—evidence from two nearly complete new specimens. *Vertebrata Palasiatica* 38(4):241-254.
  125. Pu HY, *et al.* (2017) Perinate and eggs of a giant caenagnathid dinosaur from the Late Cretaceous of central China. *Nature communications* 8:14952.
  126. Watabe M, Weishampel D, Barsbold R, Tsogtbataar K, & Suzuki S (2000) New nearly complete skeleton of the bird-like theropod, *Avimimus*, from the Upper Cretaceous of the Gobi Desert, Mongolia. *Society of Vertebrate Paleontology, Sixtieth Annual Meeting*, p 77.
  127. Vickers-Rich P, Chiappe LM, & Kurzanov S (2002) The enigmatic birdlike dinosaur *Avimimus*

- portentosus*. *Mesozoic Birds*, eds Chiappe LM & Witmer LM (University of California Press, Berkeley and Los Angeles), pp 65-86.
128. Funston GF & Currie PJ (2016) A new caenagnathid (Dinosauria: Oviraptorosauria) from the Horseshoe Canyon Formation of Alberta, Canada, and a reevaluation of the relationships of Caenagnathidae. *Journal of Vertebrate Paleontology* 36(4):e1160910.
  129. Norell MA, *et al.* (1994) A theropod dinosaur embryo and the affinities of the flaming cliffs dinosaur eggs. *Science* 266(5186):779-782.
  130. Wang S, Zhang SK, Sullivan C, & Xu X (2016) Elongatoolithid eggs containing oviraptorid (Theropoda, Oviraptorosauria) embryos from the Upper Cretaceous of Southern China. *BMC Evolutionary Biology* 16(1):67.
  131. Zhang FC, Zhou ZH, Xu X, & Wang XL (2002) A juvenile coelurosaurian theropod from China indicates arboreal habits. *Naturwissenschaften* 89(9):394-398.
  132. Zhang FC, Zhou ZH, Xu X, Wang XL, & Sullivan C (2008) A bizarre Jurassic maniraptoran from China with elongate ribbon-like feathers. *Nature* 455(7216):1105-1108.
  133. Xu X, *et al.* (2015) A bizarre Jurassic maniraptoran theropod with preserved evidence of membranous wings. *Nature* 521(7550):70-U131.
  134. Czerkas SA & Yuan CX (2002) An arboreal maniraptoran from northeast China. *The Dinosaur Museum Journal* 1:63-95.
  135. Zhang FC, Zhou ZH, & Benton MJ (2008) A primitive confuciusornithid bird from China and its implications for early avian flight. *Science in China Series D-Earth Sciences* 51(5):625-639.
  136. Zheng XT, *et al.* (2011) Fossil evidence of avian crops from the Early Cretaceous of China. *Proceedings of the National Academy of Sciences* 108(38):15904-15907.
  137. Zhou ZH & Zhang FC (2003) Anatomy of the primitive bird *Sapeornis chaoyangensis* from the Early Cretaceous of Liaoning, China. *Canadian Journal of Earth Sciences* 40(5):731-747.
  138. Kurochkin E, Chatterjee S, & Mikhailov K (2013) An embryonic enantiornithine bird and associated eggs from the Cretaceous of Mongolia. *Paleontological Journal* 47(11):1252-1269.
  139. Elzanowski A (1981) Embryonic bird skeletons from the Late Cretaceous of Mongolia. *Palaeontologia Polonica* 42:147-176.
  140. Chiappe LM, Norell M, & Clark JM (2001) A new skull of *Gobipteryx minuta* (Aves: Enantiornithes) from the Cretaceous of the Gobi Desert. *American Museum Novitates* 3346:1-15.
  141. Elzanowski A (1976) Palaeognathous bird from the Cretaceous of Central Asia. *Nature* 264(5581):51-53.
  142. Chen YP, *et al.* (2000) Conservation of early odontogenic signaling pathways in Aves. *Proceedings of the National Academy of Sciences* 97(18):10044-10049.
  143. Hedges SB, Marin J, Suleski M, Paymer M, & Kumar S (2015) Tree of Life Reveals Clock-Like Speciation and Diversification. *Molecular Biology and Evolution* 32(4):835-845.
  144. Lyson TR, *et al.* (2016) Fossorial origin of the turtle shell. *Current Biology* 26(14):1887-1894.
  145. Bever GS, Lyson TR, Field DJ, & Bhullar B-AS (2015) Evolutionary origin of the turtle skull. *Nature* 525(7568):239-242.
  146. Day M, Rubidge B, Almond J, & Jirah S (2013) Biostratigraphic correlation in the Karoo: The case of the Middle Permian parareptile *Eunotosaurus*. *South African Journal of Science* 109:68-71.
  147. Cohen KM, Finney SC, Gibbard PL, & Fan JX (2013) The ICS international chronostratigraphic

- chart. *Episodes* 36(3):199-204.
148. Butler RJ, *et al.* (2011) The sail-backed reptile *Ctenosauriscus* from the Latest Early Triassic of Germany and the timing and biogeography of the early archosaur radiation. *PloS one* 6(10):e25693.
  149. Peacock BR, *et al.* (2013) A new silesaurid from the Upper Ntawere Formation of Zambia (Middle Triassic) demonstrates the rapid diversification of Silesauridae (Avenmetatarsalia, Dinosauriformes). *Journal of Vertebrate Paleontology* 33(5):1127-1137.
  150. Nesbitt SJ, Barrett PM, Werning S, Sidor CA, & Charig AJ (2013) The oldest dinosaur? A Middle Triassic dinosauriform from Tanzania. *Biology Letters* 9(1):20120949.
  151. Pyron RA & Burbrink FT (2014) Early origin of viviparity and multiple reversions to oviparity in squamate reptiles. *Ecology Letters* 17(1):13-21.
  152. Kupfer A, Maxwell E, Reinhard S, & Kuehnel S (2016) The evolution of parental investment in caecilian amphibians: A comparative approach. *Biological Journal of the Linnean Society* 119(1):4-14.
  153. Nishikawa K, *et al.* (2008) Field observation of egg brooding in the caecilian *Caudacaecilia asplenia* from Sabah, Malaysia (Amphibia: Gymnophiona: Ichthyophiidae). *Raffles Bulletin of Zoology* 56(1):205-208.
  154. Duellman WE & Trueb L (1994) *Biology of amphibians* (JHU press).
  155. Buckley D (2001) Evolution of viviparity in salamanders (Amphibia, Caudata). *eLS*, (John Wiley & Sons, Ltd).
  156. Anderson JD & Williamson GK (1976) Terrestrial mode of reproduction in *Ambystoma cingulatum*. *Herpetologica* 32(2):214-221.
  157. Trauth SE, Jr. Cox RL, Wilhide J, & Worley HJ (1995) Egg mass characteristics of terrestrial morphs of the mole salamander, *Ambystoma talpoideum* (Caudata: Ambystomatidae), from northeastern Arkansas and clutch comparisons with other *Ambystoma* species. *Journal of the Arkansas Academy of Science* 49(1):193-196.
  158. Gomez-Mestre I, Pyron RA, & Wiens JJ (2012) Phylogenetic analyses reveal unexpected patterns in the evolution of reproductive modes in frogs. *Evolution* 66(12):3687-3700.
  159. Gill BJ (2007) Eggshell characteristics of moa eggs (Aves: Dinornithiformes). *Journal of the Royal Society of New Zealand* 37(4):139-150.
  160. Kennett R, Christian K, & Bedford G (1998) Underwater nesting by the Australian freshwater turtle *Chelodina rugosa*: Effect of prolonged immersion and eggshell thickness on incubation period, egg survivorship, and hatchling size. *Canadian Journal of Zoology* 76(6):1019-1023.
  161. Kennett R, Christian K, & Pritchard D (1993) Underwater nesting by the tropical fresh-water turtle, *Chelodina rugosa* (Testudinata, Chelidae). *Australian Journal of Zoology* 41(1):47-52.
  162. Kennett R, Georges A, & Palmerallen M (1993) Early developmental arrest during immersion of eggs of a tropical fresh-water turtle, *Chelodina rugosa* (Testudinata, Chelidae), from northern Australia. *Australian Journal of Zoology* 41(1):37-45.
  163. Polisar J (1996) Reproductive biology of a flood-season nesting freshwater turtle of the northern neotropics: *Dermatemys mawii* in Belize. *Chelonian Conservation and Biology* 2:13-25.
  164. Jehl JR (1968) The egg tooth of some charadriiform birds. *The Wilson Bulletin* 80(3):328-330.
  165. Wiebe KL (2010) A supplemental function of the avian egg tooth. *The Condor* 112(1):1-7.
  166. Hughes RL (1984) Structural adaptations of the eggs and the fetal membranes of monotremes and marsupials for respiration and metabolic exchange. *Respiration and metabolism of*

- embryonic vertebrates: Satellite Symposium of the 29th International Congress of Physiological Sciences, Sydney, Australia, 1983*, ed Seymour RS (Springer Netherlands, Dordrecht), pp 389-421.
167. Heulin B, Ghielmi S, Vogrin N, Surget-Groba Y, & Guillaume CP (2002) Variation in eggshell characteristics and in intrauterine egg retention between two oviparous clades of the lizard *Lacerta vivipara*: Insight into the oviparity-viviparity continuum in squamates. *Journal of Morphology* 252(3):255-262.
  168. Underwood G & Lee MSY (2000) The egg teeth of *Dibamus* and their bearing on possible relationships with gekkotan lizards. *Amphibia-Reptilia* 21(4):507-511.
  169. Smith MA (1935) The fauna of British India. Reptilia, and Amphibia: vol. 2. Sauria. *London*, *xiii*:1-440.
  170. Pike DA, Andrews RM, & Du WG (2012) Eggshell morphology and gekkotan life-history evolution. *Evolutionary Ecology* 26(4):847-861.
  171. Cree A, Guilette Jr LJ, & Reader K (1996) Eggshell formation during prolonged gravidity of the tuatara *Sphenodon punctatus*. *Journal of morphology* 230(2):129-144.
  172. Kusuda S, *et al.* (2013) Diversity in the matrix structure of eggshells in the Testudines (Reptilia). *Zoological Science* 30(5):366-374.
  173. Svensson ME & Haas A (2005) Evolutionary innovation in the vertebrate jaw: A derived morphology in anuran tadpoles and its possible developmental origin. *BioEssays* 27(5):526-532.
  174. Hennig W & Davis DD (1966) *Phylogenetic Systematics* (University of Illinois Press, Champaign) p 263.
  175. Matzke N BioGeoBEARS: BioGeography with Bayesian (and Likelihood) Evolutionary Analysis in R Scripts. 2013 (University of California, Berkeley, CA).
  176. Team RC (2016) A language and environment for statistical computing. R Foundation for statistical computing, 2015; Vienna, Austria.
  177. Maddison WP & FitzJohn RG (2015 ) The unsolved challenge to phylogenetic correlation tests for categorical characters. *Systematic Biology* 64(1):127-136.
  178. Bell A & Chiappe LM (2015) Identification of a new Hesperornithiform from the Cretaceous Niobrara Chalk and implications for ecologic diversity among early diving birds. *PloS one* 10(11):e0141690.
  179. Sire JY, Davit-Beal T, Delgado S, Van Der Heyden C, & Huysseune A (2002) First-generation teeth in nonmammalian lineages: Evidence for a conserved ancestral character? *Microsc Res Tech* 59(5):408-434.
  180. Oberhammer E, Barten C, Schweizer M, Das I, & Haas A (2014) Description of the tadpoles of three rare species of megophryid frogs (Amphibia: Anura: Megophryidae) from Gunung Mulu, Sarawak, Malaysia. *2014* 3835(1):21.
  181. Hermyt M, Kaczmarek P, Kowalska M, & Rupik W (2017) Development of the egg tooth – The tool facilitating hatching of squamates: Lessons from the grass snake *Natrix natrix*. *Zoologischer Anzeiger - A Journal of Comparative Zoology* 266:61-70.
  182. Tsuihiji T, Watabe M, Barsbold R, & Tsogtbaatar K (2015) A gigantic caenagnathid oviraptorosaurian (Dinosauria: Theropoda) from the Upper Cretaceous of the Gobi Desert, Mongolia. *Cretaceous Research* 56:60-65.
  183. Lamanna MC, Sues H-D, Schachner ER, & Lyson TR (2014) A new large-bodied oviraptorosaurian theropod dinosaur from the Latest Cretaceous of Western North America.



- PloS one* 9(3):e92022.
184. Currie PJ, Godfrey SJ, & Nesson L (1993) New caenagnathid (Dinosauria: Theropoda) specimens from the Upper Cretaceous of North America and Asia. *Canadian Journal of Earth Sciences* 30(10):2255-2272.
  185. Funston GF & Currie PJ (2014) A previously undescribed caenagnathid mandible from the late Campanian of Alberta, and insights into the diet of *Chirostenotes pergracilis* (Dinosauria: Oviraptorosauria). *Canadian Journal of Earth Science* 51:156-165.
  186. Tsuihiji T, Watabe M, Tsogtbaatar K, & Barsbold R (2016) Dentaries of a caenagnathid (Dinosauria: Theropoda) from the Nemegt Formation of the Gobi Desert in Mongolia. *Cretaceous Research* 63:148-153.
  187. Sues H-D & Averianov A (2015) New material of *Caenagnathasia martinsoni* (Dinosauria: Theropoda: Oviraptorosauria) from the Bissekty Formation (Upper Cretaceous: Turonian) of Uzbekistan. *Cretaceous Research* 54:50-59.
  188. Zheng XT, *et al.* (2014) On the absence of sternal elements in *Anchiornis* (Paraves) and *Sapeornis* (Aves) and the complex early evolution of the avian sternum. *Proceedings of the National Academy of Sciences* 111(38):13900-13905.
  189. Gao CL, *et al.* (2012) A subadult specimen of the Early Cretaceous bird *Sapeornis chaoyangensis* and a taxonomic reassessment of sapeornithids. *Journal of Vertebrate Paleontology* 32(5):1103-1112.
  190. Provini P, Zhou ZH, & Zhang FC (2009) A new species of the basal bird *Sapeornis* from the Early Cretaceous of Liaoning, China. *Vertebrata Palasiatica* 47(3):194-207.
  191. Czerkas SA & Ji Q (2002) A preliminary report on an omnivorous volant bird from northeast China. *Feathered Dinosaurs and the origin of flight. The Dinosaur Museum Journal*, ed Czerkas SA (The Dinosaur Museum, Utah), Vol 1, pp 127-135.
  192. Hu DY, Li L, Hou LH, & Xu X (2010) A new sapeornithid bird from China and its implication for early avian evolution. *Acta Geologica Sinica - English Edition* 84(3):472-482.
  193. Pu HY, *et al.* (2013) A new juvenile specimen of *Sapeornis* (Pygostylia: Aves) from the Lower Cretaceous of Northeast China and allometric scaling of this basal bird. *Paleontological Research* 17(1):27-38.
  194. Yuan CX (2005) Restudy on Sapeornithids from the Lower Cretaceous of Yixian County, Liaoning. Ph.D. (China University of Geosciences, Beijing).
  195. Erickson GM, *et al.* (2009) Was dinosaurian physiology inherited by birds? Reconciling slow growth in *Archaeopteryx*. *PloS one* 4(10):e7390.
  196. Pomeroy DL (2013) A morphological and taxonomic revision of the early cretaceous Sapeornithidae (Aves:Pygostylia) of Liaoning Province, China. M. S. (California State University Long Beach, Long Beach, California).
  197. Chiappe L & Meng QJ (2016) *Birds of Stone* (Johns Hopkins University Press, Baltimore) p 304.
